# Supplementary material for: lnc-SAMD14-4 can regulate expression of the COL1A1 and COL1A2 in human chondrocytes
Source: PubMed Central journal article supplement (PMC6727836; doi:10.7717/peerj.7491), 2019-09-02
Supplement: peerj-07-7491-s002.pdf [file peerj-07-7491-s002.pdf]

A

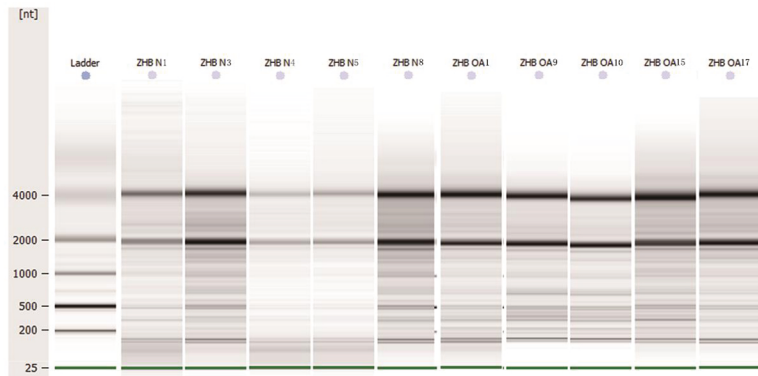

B

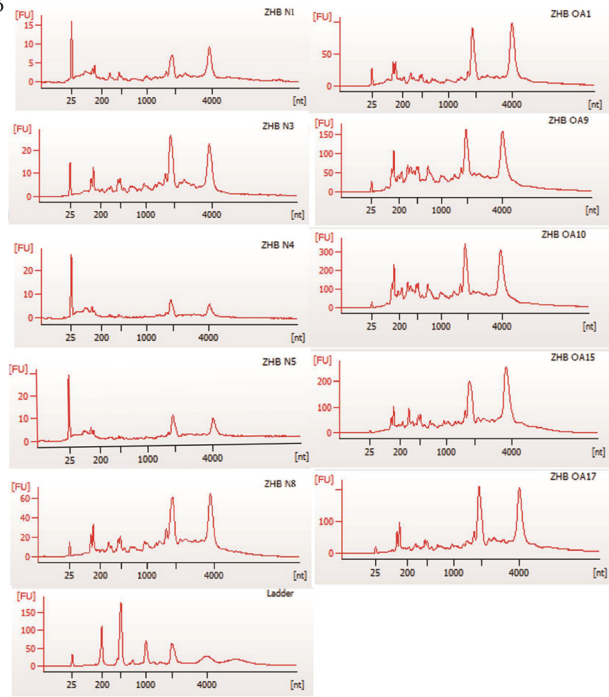

C

| No | Sample No | concentration (pg/ $\mu$ l) | Volume ( $\mu$ l) | Total quantity (pg) | 2100    |     | result |
|----|-----------|-----------------------------|-------------------|---------------------|---------|-----|--------|
|    |           |                             |                   |                     | 28S/18S | RIN |        |
| 1  | N1        | 110                         | 20                | 2200                | 1.3     | 7.1 | pass   |
| 2  | N3        | 270                         | 20                | 5400                | 1.2     | 7.0 | pass   |
| 3  | N4        | 105                         | 45                | 4725                | 0.9     | 7.1 | pass   |
| 4  | N5        | 110                         | 45                | 4950                | 0.9     | 7.7 | pass   |
| 5  | N8        | 741                         | 20                | 14820               | 1.3     | 7.0 | pass   |
| 6  | OA1       | 877                         | 45                | 39465               | 1.5     | 7.5 | pass   |
| 7  | OA9       | 818                         | 20                | 16360               | 1.5     | 7.1 | pass   |
| 8  | OA10      | 1534                        | 20                | 30680               | 1.3     | 7.3 | pass   |
| 9  | OA15      | 2678                        | 20                | 53560               | 1.7     | 7.1 | pass   |
| 10 | OA17      | 1917                        | 45                | 86265               | 1.2     | 7.2 | pass   |
