# Supplementary material for: lnc-SAMD14-4 can regulate expression of the COL1A1 and COL1A2 in human chondrocytes
Source: PubMed Central journal article supplement (PMC6727836; doi:10.7717/peerj.7491), 2019-09-02
Supplement: peerj-07-7491-s003.pdf [file peerj-07-7491-s003.pdf]

A

NCBI Resources How To truchanghabin My NCBI Sign Out

ORFinder

Open Reading Frame Viewer Help

Sequence

ORFs found: 9 Genetic code: 1 Start codons: 'ATG' only

Find:

Tools:  Tracks:

ORF Finder 11.2.201046137

ORF4 ORF5 ORF6 ORF7 ORF8 ORF9

1: 1..1.2K (1.2Kbp) Tracks shown: 2/18

ORF4 (50 aa)

```

>|1|ORF4
PTIQKGLRASSSPVPTAQHGDSGGAAHFRARISLTLEAREATVLYAGV
ALFACLTVYTRVGLSLELNSGQVYRKHFRHNRDQKCL
  
```

Mark subset... Marked 0  as

| Label | Strand | Frame | Start | Stop  | Length (nt   aa) |
|-------|--------|-------|-------|-------|------------------|
| ORF4  | +      | 3     | 180   | 452   | 273   90         |
| ORF2  | +      | 2     | 605   | 874   | 270   89         |
| ORF9  | -      | 2     | 565   | 317   | 249   82         |
| ORF7  | -      | 2     | 1117  | 920   | 198   66         |
| ORF5  | +      | 3     | 465   | 608   | 144   47         |
| ORF1  | +      | 1     | 1054  | >1176 | 123   40         |
| ORF6  | -      | 1     | 263   | 147   | 117   38         |
| ORF3  | +      | 2     | 1082  | >1177 | 96   31          |
| ORF8  | -      | 2     | 830   | 773   | 78   26          |

Six frame translation...

ORF4

BLAST Database:

B

NCBI National Center for Biotechnology Information truchanghabin My NCBI Sign Out

BLAST<sup>+</sup>

Job title:

Results for:

Hit:

Query ID:

Query length:

Database Name:

Description:

Program:

BLAST is a registered trademark of the National Library of Medicine

Support center

NCBI National Center for Biotechnology Information, U.S. National Library of Medicine  
8600 Rockville Pike, Bethesda MD, 20894 USA  
Policies and Guidelines

NIH
