# Supplementary material for: lnc-SAMD14-4 can regulate expression of the COL1A1 and COL1A2 in human chondrocytes
Source: PubMed Central journal article supplement (PMC6727836; doi:10.7717/peerj.7491), 2019-09-02

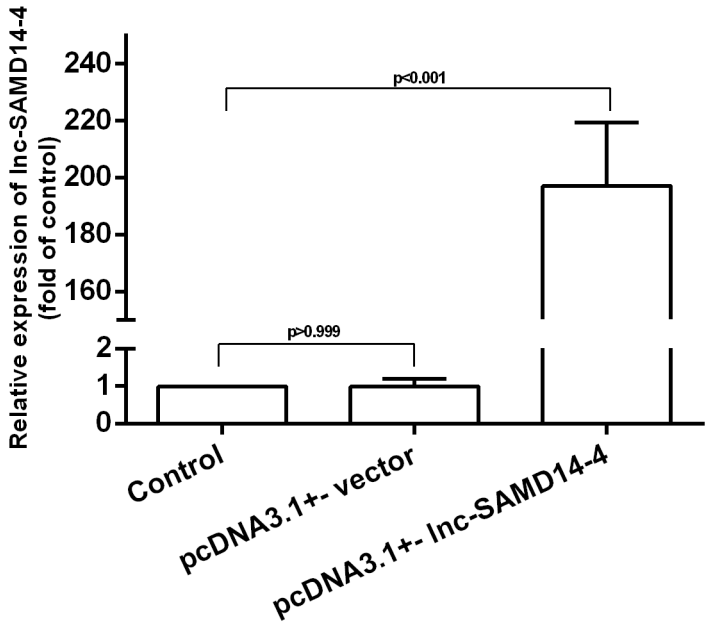

Supplement: peerj-07-7491-s005.pdf [file peerj-07-7491-s005.pdf]
