# Supplementary material for: lnc-SAMD14-4 can regulate expression of the COL1A1 and COL1A2 in human chondrocytes
Source: PeerJ. 2019 Sep 2;7:e7491. doi: 10.7717/peerj.7491 (PMC6727836; doi:10.7717/peerj.7491)
Supplement: Table S3 [file peerj-07-7491-s009.xlsx]

## Sheet: OA VS N _NonCoding_up
Probe Set ID	p ([OA] Vs [N])	Regulation ([OA] Vs [N])	FC ([OA] Vs [N])	[N2](normalized)	[N3](normalized)	[N4](normalized)	[N5](normalized)	[N6](normalized)	[OA1](normalized)	[OA10](normalized)	[OA15](normalized)	[OA17](normalized)	[OA9](normalized)	GeneSymbol	Description	EnsemblID	EntrezGeneID	HAVANAID	lncipediaID	locus type	NonCodeID	OtherDatabaseID	UCSCID	RefSeqID	Chr	strand	start	stop	Cytoband
TC1700002600.oe.1	0.00036	up	86.1105	8.9462	5.1972	6.02345	4.40576	9.58197	12.2836	13.3026	13.7192	12.7249	14.2648	NONHSAG022166//lnc-SAMD14-4	NONCODE class 'Exonic', Ensembl Cross Reference: ENST00000486572 Name: COL1A1//LNCipedia Identified Transcript//NONCODE class 'Exonic', Ensembl Cross Reference: ENST00000511732 Name: COL1A1	---	---	---	lnc-SAMD14-4:2//lnc-SAMD14-4:1	NonCoding	NONHSAT054604//NONHSAT146912	---	---	---	chr17	-	50187607	50188784	17q21.33
TSUnmapped00000933.oe.1	9.23e-05	up	80.5178	9.91847	6.94797	9.55408	7.02748	10.6865	15.7386	14.9043	15.7289	13.6187	15.8	lnc-MARCKS-7	LNCipedia Identified Transcript	---	---	---	lnc-MARCKS-7:1	NonCoding	---	---	---	---	---	---	---	---	---
TC1700002601.oe.1	1.61e-05	up	76.3916	8.54568	6.55892	7.10998	7.09236	9.30014	12.4395	13.9526	14.6366	13.7977	15.0574	lnc-SAMD14-5	NONCODE class 'Exonic', Ensembl Cross Reference: ENST00000494334 Name: COL1A1//NONCODE class 'Exonic', Ensembl Cross Reference: ENST00000504289 Name: COL1A1//NONCODE class 'Exonic', Ensembl Cross Reference: ENST00000471344 Name: COL1A1//NONCODE class 'Exonic', Ensembl Cross Reference: ENST00000463440 Name: COL1A1//LNCipedia Identified Transcript//NONCODE class 'Exonic', Ensembl Cross Reference: E…	---	---	---	lnc-SAMD14-5:1	NonCoding	NONHSAT054609//NONHSAT054612//NONHSAT054608//NONHSAT054610//NONHSAT054611	---	---	---	chr17	-	50190309	50195665	17q21.33
TC1500002122.oe.1	0.00126518	up	57.4449	10.1581	4.47672	6.92651	4.93208	9.15034	12.6035	12.9636	14.3114	13.3406	11.6452	lnc-AP3S2-2	NONCODE class 'Exonic', Ensembl Cross Reference: ENST00000559761 Name: ANPEP//LNCipedia Identified Transcript	---	---	---	lnc-AP3S2-2:1	NonCoding	NONHSAT048340	---	---	---	chr15	-	89797445	89799560	15q26.1
TC0700000919.oe.1	0.00126153	up	56.1424	12.9567	7.01551	9.47128	7.91491	11.9578	14.3016	15.7987	16.1979	15.7339	16.3392	lnc-CASD1-2	NONCODE class 'Exonic'//NONCODE class 'Exonic', Ensembl Cross Reference: ENST00000497316 Name: COL1A2//NONCODE class 'Exonic', PubMed Identifer: PMID:22140575 mixed_Pred44826//NONCODE class 'Exonic', PubMed Identifer: PMID:22140575 mixed_Pred44825//NONCODE class 'Exonic', Ensembl Cross Reference: ENST00000467931 Name: COL1A2//LNCipedia Identified Transcript//NONCODE class 'Exonic', Ensembl Cross …	---	---	---	lnc-CASD1-2:1	NonCoding	NONHSAT122039//NONHSAT122035//NONHSAT122040//NONHSAT122038//NONHSAT122036//NONHSAT122043//NONHSAT122041//NONHSAT122034	---	---	---	chr7	+	94417464	94427492	7q21.3
TC0700000183.oe.1	6.33e-06	up	50.9158	8.77314	6.58515	8.37177	7.42222	9.18076	13.3276	13.518	14.0938	13.1233	14.6206	lnc-TSPAN13-4	LNCipedia Identified Transcript//NONCODE class 'Exonic', Ensembl Cross Reference: ENST00000475440 Name: AHR	---	---	---	lnc-TSPAN13-4:1	NonCoding	NONHSAT119326	---	---	---	chr7	+	17329858	17333950	7p21.1
TC1900001040.oe.1	0.00931296	up	47.8036	13.5	5.29342	5.22078	5.51574	6.70679	13.9637	12.1904	12.1425	12.1276	13.7078	lnc-PPM1N-1	LNCipedia Identified Transcript//NONCODE class 'Exonic', Ensembl Cross Reference: ENST00000586113 Name: FOSB	---	---	---	lnc-PPM1N-1:1	NonCoding	NONHSAT066780	---	---	---	chr19	+	45469886	45472067	19q13.32
TC1300001114.oe.1	0.00982566	up	47.4302	7.94064	4.67378	4.8414	4.60553	10.3378	8.0243	11.5351	15.3135	12.307	13.058	lnc-TRPC4-2	NONCODE class 'Exonic', Ensembl Cross Reference: ENST00000474646 Name: POSTN//LNCipedia Identified Transcript//NONCODE class 'Exonic', Ensembl Cross Reference: ENST00000497145 Name: POSTN//NONCODE class 'Exonic', Ensembl Cross Reference: ENST00000473823 Name: POSTN//NONCODE class 'Exonic', Ensembl Cross Reference: ENST00000478947 Name: POSTN	---	---	---	lnc-TRPC4-2:1	NonCoding	NONHSAT033254//NONHSAT033253//NONHSAT033252//NONHSAT033251	---	---	---	chr13	-	37562697	37571535	13q13.3
TC0100000248.oe.1	2.02e-05	up	40.1254	5.81357	5.62223	5.94337	5.33513	7.78186	11.8458	10.1531	12.6675	11.2946	11.1674	lnc-C1orf196-1	NONCODE class 'Linc', External ID: TCONS_00002146//gene_id XLOC_000057; transcript_id TCONS_00000842; oId TCONS_00000072; linc_name linc-KAZ-1; tss_id TSS110; class_code u; gene_name linc-KAZ;//LNCipedia Identified Transcript - Alternate transcript name(s): FPKM1_group_147_transcript_2//LNCipedia Identified Transcript//NONCODE class 'Linc', PubMed Identifer: PMID:23818866 FPKM1_group_147_transcrip	---	---	---	lnc-C1orf196-1:1	NonCoding	NONHSAT000993//NONHSAT000992	TCONS_00000842	---	---	chr1	+	14205478	14206373	1p36.21
TC0500001220.oe.1	0.0225672	up	39.5853	15.2086	5.84568	7.63487	8.86626	12.9408	13.0037	15.2779	17.2886	16.604	14.8566	lnc-SMAD5-7	NONCODE class 'Exonic', Ensembl Cross Reference: ENST00000509749 Name: TGFBI//LNCipedia Identified Transcript	---	---	---	lnc-SMAD5-7:1	NonCoding	NONHSAT103943	---	---	---	chr5	+	136047353	136049807	5q31.1
TC0700000184.oe.1	7.7e-07	up	37.4391	6.32989	5.47745	6.9709	6.37074	7.22573	11.6225	11.3908	12.0209	11.0806	12.3923	lnc-TSPAN13-5	NONCODE class 'Exonic', Ensembl Cross Reference: ENST00000481944 Name: AHR//LNCipedia Identified Transcript	---	---	---	lnc-TSPAN13-5:1	NonCoding	NONHSAT119327	---	---	---	chr7	+	17334910	17336075	7p21.1
TC0800001704.oe.1	0.00103528	up	36.9693	7.65446	8.08344	8.75685	7.53059	12.8813	13.3303	14.7394	14.8796	13.8214	14.1773	lnc-SFRP1-2	LNCipedia Identified Transcript//NONCODE class 'Exonic'	---	---	---	lnc-SFRP1-2:1	NonCoding	NONHSAT126216	---	---	---	chr8	-	41261949	41262485	8p11.21
TC0200004844.oe.1	0.000862	up	36.9144	7.623	5.92055	6.71088	6.24961	9.53671	10.9561	11.0581	15.2085	12.7056	12.1429	lnc-HJURP-12	LNCipedia Identified Transcript//NONCODE class 'Exonic'	---	---	---	lnc-HJURP-12:1	NonCoding	NONHSAT077537	---	---	---	chr2	-	234493046	234495144	2q37.1
TC1700002782.oe.1	0.000572	up	33.9237	5.68137	5.18232	6.4003	4.69175	5.5876	12.6087	10.631	10.6775	7.38892	11.6584	lnc-TEX2-2	LNCipedia Identified Transcript//NONCODE class 'Exonic'	---	---	---	lnc-TEX2-2:1	NonCoding	NONHSAT055277	---	---	---	chr17	-	64322504	64323845	17q23.3
TC1100000680.oe.1	0.00108742	up	31.0008	5.87837	5.74435	6.96234	5.44322	6.58777	14.1552	10.5158	12.2509	8.85678	9.6085	lnc-MS4A6E-1	NONCODE class 'Exonic', Ensembl Cross Reference: ENST00000529991 Name: MS4A4A//LNCipedia Identified Transcript	---	---	---	lnc-MS4A6E-1:1	NonCoding	NONHSAT021565	---	---	---	chr11	+	60305733	60308364	11q12.2
TC1900001041.oe.1	0.0148517	up	30.2532	17.7792	10.1803	9.92357	9.47144	10.6167	16.5602	16.1783	16.0812	15.9896	17.7571	lnc-FOSB-1	LNCipedia Identified Transcript//NONCODE class 'Exonic'	---	---	---	lnc-FOSB-1:1	NonCoding	NONHSAT066782	---	---	---	chr19	+	45474939	45475181	19q13.32
TSUnmapped00000235.oe.1	0.0084196	up	29.4092	10.5314	5.63746	7.3146	6.37016	10.2704	9.48473	12.8106	15.5477	13.0583	13.6136	lnc-FANK1-2	LNCipedia Identified Transcript	---	---	---	lnc-FANK1-2:1	NonCoding	---	---	---	---	---	---	---	---	---
TC0700001830.oe.1	0.000281	up	26.8693	5.92641	5.72422	5.64631	5.88741	7.71525	8.80459	10.4466	12.9235	10.9997	11.4646	lnc-FERD3L-1	LNCipedia Identified Transcript//NONCODE class 'Linc'	---	---	---	lnc-FERD3L-1:1	NonCoding	NONHSAT119378	---	---	---	chr7	-	19093102	19093378	7p21.1
TC0200001932.oe.1	0.00957296	up	26.39	15.613	9.49764	10.3597	10.9116	13.6508	13.5459	17.244	17.9489	17.6473	17.256	lnc-GULP1-4	LNCipedia Identified Transcript//NONCODE class 'Exonic'	---	---	---	lnc-GULP1-4:1	NonCoding	NONHSAT076043	---	---	---	chr2	+	189006929	189008986	2q32.2
TC0300000559.oe.1	1.05e-05	up	26.0991	7.14186	7.12501	8.17643	7.04561	8.27529	13.0964	11.4753	13.1773	12.291	11.2539	lnc-NISCH-1	NONCODE class 'Exonic', Ensembl Cross Reference: ENST00000484850 Name: STAB1//LNCipedia Identified Transcript	---	---	---	lnc-NISCH-1:1	NonCoding	NONHSAT089933	---	---	---	chr3	+	52507961	52509476	3p21.1
TC0700002635.oe.1	2.1e-05	up	25.6453	6.36127	6.77179	7.11863	5.3557	7.12416	11.578	10.5871	12.4615	10.0732	11.4348	lnc-TMEM168-4	LNCipedia Identified Transcript//NONCODE class 'Sense No Exonic'	---	---	---	lnc-TMEM168-4:1	NonCoding	NONHSAT122778	---	---	---	chr7	-	112180961	112181499	7q31.1
TC1300000814.oe.1	3.58e-05	up	25.1358	8.58968	8.23877	10.4502	7.4679	9.33131	13.4751	13.5541	13.1134	12.8569	14.3367	lnc-CARKD-2	LNCipedia Identified Transcript//NONCODE class 'Sense No Exonic', External ID: TCONS_00009641	---	---	---	lnc-CARKD-2:1	NonCoding	NONHSAT035144	---	---	---	chr13	+	110385456	110385847	13q34
TC0700002375.oe.1	0.00132716	up	22.3578	9.24033	5.83844	8.47429	6.0432	10.3773	11.8255	12.4033	13.4258	12.5289	12.2035	lnc-GNAT3-5	LNCipedia Identified Transcript//NONCODE class 'Exonic', Ensembl Cross Reference: ENST00000459652 Name: SEMA3C	---	---	---	lnc-GNAT3-5:1	NonCoding	NONHSAT121753	---	---	---	chr7	-	80815949	80818409	7q21.11
TC0300001397.oe.1	0.000777	up	22.2409	4.93127	4.67016	4.86229	4.30352	6.97743	10.7301	8.05613	11.8183	8.49882	9.01703	lnc-GMPS-5	LNCipedia Identified Transcript//NONCODE class 'Exonic', Ensembl Cross Reference: ENST00000493888 Name: MME	---	---	---	lnc-GMPS-5:1	NonCoding	NONHSAT092820	---	---	---	chr3	+	155172104	155180738	3q25.2
TC0700000346.oe.1	0.000395	up	22.1906	6.93244	5.03156	5.42498	4.67141	7.71942	9.02137	10.978	11.4081	11.2876	9.44417	lnc-RP5-877J2.1.1-1	LNCipedia Identified Transcript//NONCODE class 'Exonic'	---	---	---	lnc-RP5-877J2.1.1-1:1	NonCoding	NONHSAT119933	---	---	---	chr7	+	30922579	30924072	7p14.3
TC1100003015.oe.1	5.66e-06	up	21.9829	7.85479	8.22253	9.11779	8.05592	9.52633	12.5055	12.2859	13.7519	13.2422	13.2834	lnc-FAM55D-2	NONCODE class 'Exonic', Ensembl Cross Reference: ENST00000540373 Name: CADM1//LNCipedia Identified Transcript	---	---	---	lnc-FAM55D-2:1	NonCoding	NONHSAT024300	---	---	---	chr11	-	115214699	115218144	11q23.3
TC0300002485.oe.1	0.000518	up	21.6061	5.5023	4.31501	6.2415	4.72761	6.25501	11.2541	9.71485	9.66546	7.4355	11.1383	lnc-PRICKLE2-6	NONCODE class 'Exonic', Ensembl Cross Reference: ENST00000494004 Name: ADAMTS9//LNCipedia Identified Transcript	---	---	---	lnc-PRICKLE2-6:1	NonCoding	NONHSAT090260	---	---	---	chr3	-	64654390	64656044	3p14.1
TC0500003341.oe.1	0.000327	up	21.5152	7.80516	5.07137	5.03771	4.40709	6.25706	8.57018	10.914	10.7416	10.5843	9.90466	lnc-GRM6-4	NONCODE class 'Exonic', PubMed Identifer: PMID:22140575 mixed_Pred40169 , PubMed Identifer: PMID:22140575 brain_Pred33776//LNCipedia Identified Transcript//NONCODE class 'Exonic'	---	---	---	lnc-GRM6-4:1	NonCoding	NONHSAT105574//NONHSAT105575	---	---	---	chr5	-	179110853	179113735	5q35.3
TC0X00001225.oe.1	2.43e-06	up	21.4709	6.0784	4.87666	6.21832	5.23173	6.06209	9.43291	10.3597	10.0207	9.80121	10.9743	lnc-RPGR-4	LNCipedia Identified Transcript//NONCODE class 'Exonic', Ensembl Cross Reference: ENST00000479015 Name: SRPX	---	---	---	lnc-RPGR-4:1	NonCoding	NONHSAT136639	---	---	---	chrX	-	38149351	38160098	Xp11.4
TC1700002603.oe.1	0.000111	up	21.3532	5.27245	4.26675	5.13836	5.50439	5.63034	7.57721	9.42947	10.313	9.50901	11.0655	lnc-COL1A1-5	LNCipedia Identified Transcript//NONCODE class 'Exonic', Ensembl Cross Reference: ENST00000474644 Name: COL1A1	---	---	---	lnc-COL1A1-5:1	NonCoding	NONHSAT054618	---	---	---	chr17	-	50199278	50201632	17q21.33
TC1000002619.oe.1	0.0101586	up	21.2214	8.50763	4.54403	5.51666	5.10133	8.71429	7.6025	10.5343	13.6249	10.9786	11.6808	lnc-DHX32-1	NONCODE Identified Transcript//LNCipedia Identified Transcript//NONCODE class 'Exonic'	---	---	---	lnc-DHX32-1:1	NonCoding	NONHSAT016929//NONHSAT016928	---	---	---	chr10	-	126012387	126014767	10q26.2
TC1200002589.oe.1	0.000894	up	19.6595	5.81013	5.37888	6.98272	5.46592	5.94435	12.7238	9.06442	10.7366	8.10716	10.4358	lnc-E2F7-7	LNCipedia Identified Transcript//NONCODE class 'Exonic', Ensembl Cross Reference: ENST00000548783 Name: CSRP2	---	---	---	lnc-E2F7-7:1	NonCoding	NONHSAT029595	---	---	---	chr12	-	76858716	76864954	12q21.2
TC0700002096.oe.1	0.0244813	up	19.2291	13.9308	5.58589	8.20544	6.94913	9.97623	14.5462	11.8557	14.2479	12.1344	13.1894	lnc-AC011294.3.1-6	LNCipedia Identified Transcript//NONCODE class 'Exonic', Ensembl Cross Reference: ENST00000460209 Name: IGFBP3	---	---	---	lnc-AC011294.3.1-6:1	NonCoding	NONHSAT120476	---	---	---	chr7	-	45913773	45915325	7p12.3
TC0100001913.oe.1	0.000894	up	18.844	6.77177	6.24214	7.85527	5.98531	7.64075	13.3769	10.6639	12.2265	9.28816	10.12	lnc-FCER1G-1	LNCipedia Identified Transcript//NONCODE class 'Exonic', Ensembl Cross Reference: ENST00000490414 Name: FCER1G	---	---	---	lnc-FCER1G-1:1	NonCoding	NONHSAT007139	---	---	---	chr1	+	161215234	161219248	1q23.3
TC1100001092.oe.1	0.000339	up	18.5923	6.01461	5.97354	6.32299	5.70754	6.63628	12.5211	9.68157	11.3885	9.14311	9.00384	lnc-SLCO2B1-4	LNCipedia Identified Transcript//NONCODE class 'Exonic', Ensembl Cross Reference: ENST00000526660 Name: SLCO2B1	---	---	---	lnc-SLCO2B1-4:1	NonCoding	NONHSAT023077	---	---	---	chr11	+	75100563	75188233	11q13.4
TC1700002319.oe.1	0.00123955	up	18.163	5.62727	6.23005	4.5899	5.5061	7.74608	8.31561	9.1352	12.088	11.1899	9.88537	lnc-ARL5C-8	LNCipedia Identified Transcript//NONCODE class 'Exonic', Ensembl Cross Reference: ENST00000444435 Name: PLXDC1	---	---	---	lnc-ARL5C-8:1	NonCoding	NONHSAT053409	---	---	---	chr17	-	39096868	39107468	17q12
TC0700000246.oe.1	0.00044	up	18.0454	6.19454	6.50268	7.51231	5.75489	9.11769	10.1309	10.7089	12.5766	11.5286	11.0049	lnc-C7orf30-2	LNCipedia Identified Transcript//NONCODE class 'Exonic', Ensembl Cross Reference: ENST00000470994 Name: GPNMB//NONCODE class 'Exonic', Ensembl Cross Reference: ENST00000468723 Name: GPNMB	---	---	---	lnc-C7orf30-2:1	NonCoding	NONHSAT119523//NONHSAT119522	---	---	---	chr7	+	23270043	23274550	7p15.3
TC0800002069.oe.1	0.00046	up	17.9246	6.70157	8.28443	8.43728	8.51696	8.12705	11.1344	13.3724	10.187	12.7044	13.4885	lnc-DCAF4L2-3	LNCipedia Identified Transcript//NONCODE class 'Linc'	---	---	---	lnc-DCAF4L2-3:1	NonCoding	NONHSAT127587	---	---	---	chr8	-	88032016	88034562	8q21.3
TC0700001512.oe.1	0.0111398	up	17.7066	6.19048	5.2833	7.1314	5.37537	6.18944	14.338	9.75013	10.3092	6.71463	9.78907	lnc-GIMAP7-1	LNCipedia Identified Transcript//NONCODE class 'Exonic'	---	---	---	lnc-GIMAP7-1:1	NonCoding	NONHSAT124144	---	---	---	chr7	+	150573570	150573952	7q36.1
TC0700002613.oe.1	0.000736	up	17.4032	5.43519	4.83537	6.75421	5.48232	7.73277	11.8532	9.09508	11.1906	8.99023	9.7171	lnc-LAMB4-1	LNCipedia Identified Transcript//NONCODE class 'Exonic', Ensembl Cross Reference: ENST00000479448 Name: LAMB1	---	---	---	lnc-LAMB4-1:1	NonCoding	NONHSAT122724	---	---	---	chr7	-	107951101	107952090	7q31.1
TC1700002318.oe.1	0.000366	up	17.214	6.72782	6.06083	5.9375	5.84305	7.84234	8.75021	10.0184	12.2133	11.3517	10.6055	lnc-ARL5C-9	NONCODE class 'Exonic', Ensembl Cross Reference: ENST00000578277 Name: PLXDC1//LNCipedia Identified Transcript//NONCODE class 'Exonic', Ensembl Cross Reference: ENST00000579417 Name: PLXDC1//NONCODE class 'Exonic', Ensembl Cross Reference: ENST00000582025 Name: PLXDC1	---	---	---	lnc-ARL5C-9:1	NonCoding	NONHSAT053406//NONHSAT053405//NONHSAT053404	---	---	---	chr17	-	39067922	39079270	17q12
TC0100001222.oe.1	0.00295004	up	17.1975	10.8892	7.4071	8.46946	5.81184	9.45747	14.0406	12.7585	11.9575	11.3823	12.4169	lnc-LRRC8B-4	LNCipedia Identified Transcript - Alternate transcript name(s): expReg_chr1_11632_+	---	---	---	lnc-LRRC8B-4:1	NonCoding	---	---	---	---	chr1	+	89636325	89636628	1p22.2
TC0200004871.oe.1	0.00194257	up	17.1395	8.65286	4.91446	5.69242	6.25491	7.66409	8.42638	10.7747	11.8322	11.5252	11.1166	lnc-AC112721.1.1-4	LNCipedia Identified Transcript//NONCODE class 'Exonic', Ensembl Cross Reference: ENST00000493608 Name: COL6A3	---	---	---	lnc-AC112721.1.1-4:1	NonCoding	NONHSAT077639	---	---	---	chr2	-	237332968	237334786	2q37.3
TC0500001221.oe.1	0.0175647	up	17.1194	12.6911	6.92296	7.55684	7.16135	10.0116	10.3182	12.7916	15.1362	14.152	12.4336	lnc-SMAD5-6	LNCipedia Identified Transcript//NONCODE class 'Exonic', Ensembl Cross Reference: ENST00000513497 Name: TGFBI//NONCODE class 'Exonic', Ensembl Cross Reference: ENST00000504411 Name: TGFBI	---	---	---	lnc-SMAD5-6:1	NonCoding	NONHSAT103945//NONHSAT103944	---	---	---	chr5	+	136058767	136063803	5q31.1
TC0100000250.oe.1	3.92e-05	up	17.1157	5.66234	5.50808	5.88208	4.80711	7.36933	10.0742	9.15913	10.797	10.1274	9.55733	lnc-C1orf196-4	NONCODE class 'Linc', PubMed Identifer: PMID:23818866 FPKM1_group_166_transcrip//LNCipedia Identified Transcript - Alternate transcript name(s): FPKM1_group_166_transcript_4	---	---	---	lnc-C1orf196-4:1	NonCoding	NONHSAT001006	---	---	---	chr1	+	14380006	14381388	1p36.21
TC1000002622.oe.1	0.0157446	up	16.6518	10.9319	5.36169	6.01846	6.57484	9.65946	9.12608	11.4703	13.7572	12.2944	12.1865	lnc-DHX32-4	LNCipedia Identified Transcript//NONCODE class 'Exonic', Ensembl Cross Reference: ENST00000494661 Name: ADAM12	---	---	---	lnc-DHX32-4:1	NonCoding	NONHSAT016934	---	---	---	chr10	-	126135368	126155305	10q26.2
TC0500000786.oe.1	0.00141752	up	16.0167	11.5765	6.65655	9.23751	7.99874	9.26765	13.3195	13.3477	12.2353	12.7633	13.0786	lnc-XRCC4-6	LNCipedia Identified Transcript//NONCODE class 'Exonic', Ensembl Cross Reference: ENST00000507162 Name: VCAN	---	---	---	lnc-XRCC4-6:1	NonCoding	NONHSAT102522	---	---	---	chr5	+	83541948	83553474	5q14.3
TSUnmapped00000569.oe.1	0.000695	up	15.4953	4.88618	5.90993	6.73204	5.27311	6.15443	11.6217	8.73648	11.0617	8.96097	8.34371	lnc-LILRB5-1	LNCipedia Identified Transcript	---	---	---	lnc-LILRB5-1:1	NonCoding	---	---	---	---	---	---	---	---	---
TC0200002626.oe.1	0.00142164	up	15.3924	8.17739	5.58062	8.14782	6.90257	9.86539	12.1595	11.7371	12.6908	10.1909	11.6163	lnc-RNASEH1-7	LNCipedia Identified Transcript//NONCODE Identified Transcript, Ensembl Cross Reference: ENST00000335179 Name: TMSB4XP2//NONCODE class 'Antisense'	---	---	---	lnc-RNASEH1-7:1	NonCoding	NONHSAT068750//NONHSAT068751	---	---	---	chr2	-	3617300	3617757	2p25.3
TC0500001872.oe.1	0.000216	up	15.2725	6.22769	4.61215	6.4278	4.54269	6.63288	10.2252	9.18115	10.9436	8.9536	8.80397	lnc-TAS2R1-24	LNCipedia Identified Transcript//NONCODE class 'Exonic'	---	---	---	lnc-TAS2R1-24:1	NonCoding	NONHSAT100322	---	---	---	chr5	-	9035032	9037299	5p15.31
TC1700002602.oe.1	7.66e-05	up	14.8684	7.28393	6.36672	6.18861	5.90869	7.58846	9.48375	9.82835	11.0883	10.6458	11.7611	lnc-SAMD14-6	NONCODE class 'Exonic', Ensembl Cross Reference: ENST00000485870 Name: COL1A1//LNCipedia Identified Transcript//NONCODE class 'Exonic', Ensembl Cross Reference: ENST00000495677 Name: COL1A1	---	---	---	lnc-SAMD14-6:1	NonCoding	NONHSAT054614//NONHSAT054617	---	---	---	chr17	-	50196079	50198702	17q21.33
TC2100000769.oe.1	0.0038923	up	14.8198	9.8582	5.09883	6.1684	4.81634	7.77497	10.851	9.87237	11.2091	11.0264	10.2051	lnc-RCAN1-6	LNCipedia Identified Transcript//NONCODE class 'Sense No Exonic'	---	---	---	lnc-RCAN1-6:1	NonCoding	NONHSAT081901	---	---	---	chr21	-	34941817	34945040	21q22.12
TSUnmapped00000234.oe.1	0.0146154	up	13.9648	7.86105	4.27373	4.72439	4.5221	7.60213	6.51746	9.27248	12.3381	9.69395	10.18	lnc-FANK1-1	LNCipedia Identified Transcript	---	---	---	lnc-FANK1-1:1	NonCoding	---	---	---	---	---	---	---	---	---
TC0700000839.oe.1	0.0050529	up	13.9331	3.79697	3.27302	4.39277	3.44019	3.6842	10.6486	7.24407	6.99104	4.6012	8.10449	lnc-CD36-5	NONCODE class 'Exonic', Ensembl Cross Reference: ENST00000464213 Name: CD36//LNCipedia Identified Transcript	---	---	---	lnc-CD36-5:1	NonCoding	NONHSAT121750	---	---	---	chr7	+	80665914	80679277	7q21.11
TC0800001134.oe.1	0.00510003	up	13.9152	10.4551	5.40509	6.6121	6.76854	9.05548	10.7731	10.874	12.9465	11.3905	11.3053	lnc-WISP1-5//WISP1-OT1//NONHSAG051330	LNCipedia Identified Transcript//WISP1 overlapping transcript 1 [Source:HGNC Symbol;Acc:HGNC:49126]//NONCODE class 'Exonic', Ensembl Cross Reference: ENST00000602893 Name: CTC-458A3.8	ENST00000602893.1//ENST00000602893	---	---	lnc-WISP1-5:2	NonCoding	NONHSAT129217	---	---	---	chr8	+	133229056	133229697	8q24.22
TC0100001920.oe.1	0.00358038	up	13.5733	5.58986	5.56847	5.77216	5.3821	5.86414	12.3445	8.19343	10.7596	8.11517	7.57747	lnc-HSPA6-2//NONHSAG003264//NONHSAG003269//RP11-25K21.6	N/A//NONCODE class 'Exonic', Ensembl Cross Reference: ENST00000508651 Name: FCGR2C//NONCODE class 'Exonic', Ensembl Cross Reference: ENST00000491841 Name: FCGR2A//LNCipedia Identified Transcript//NONCODE class 'Exonic', Ensembl Cross Reference: ENST00000467903 Name: FCGR2C//NONCODE class 'Exonic', Ensembl Cross Reference: ENST00000459885 Name: FCGR2A//NONCODE class 'Exonic', External ID: TCONS_00…	ENST00000537821//ENST00000537821.2	---	---	lnc-HSPA6-2:2//lnc-HSPA6-2:11//lnc-HSPA6-2:10//lnc-HSPA6-2:3//lnc-HSPA6-2:4//lnc-HSPA6-2:9//lnc-HSPA6-2:1	NonCoding	NONHSAT007191//NONHSAT007175//NONHSAT007174//NONHSAT007173//NONHSAT007190//NONHSAT007192	---	---	---	chr1	+	161513176	161605662	1q23.3
TC0700002011.oe.1	0.00325205	up	13.5311	7.71862	6.16464	8.10715	5.69684	6.19279	13.4583	10.1693	10.3379	8.89117	9.81431	lnc-ELMO1-2	NONCODE class 'Exonic', Ensembl Cross Reference: ENST00000478975 Name: SFRP4//LNCipedia Identified Transcript	---	---	---	lnc-ELMO1-2:1	NonCoding	NONHSAT120157	---	---	---	chr7	-	37907262	37909839	7p14.1
TC1500002123.oe.1	0.000402	up	13.3705	6.15743	4.26412	4.59763	3.954	6.09697	8.91172	8.38713	10.0214	9.134	7.32082	lnc-AP3S2-1	NONCODE class 'Exonic', Ensembl Cross Reference: ENST00000559887 Name: ANPEP//LNCipedia Identified Transcript	---	---	---	lnc-AP3S2-1:1	NonCoding	NONHSAT048341	---	---	---	chr15	-	89803985	89804851	15q26.1
TC1300001234.oe.1	0.00202683	up	13.359	5.42578	4.62105	6.18175	4.99925	6.09074	11.5145	8.58147	10.0237	6.834	9.06368	lnc-RCBTB2-5	LNCipedia Identified Transcript//NONCODE class 'Antisense,Exonic', Ensembl Cross Reference: ENST00000482024 Name: LPAR6	---	---	---	lnc-RCBTB2-5:1	NonCoding	NONHSAT033714	---	---	---	chr13	-	48411741	48412489	13q14.2
TC0200004872.oe.1	0.00437588	up	13.2795	15.8027	11.2419	12.3072	11.8912	14.4746	15.2768	16.9966	17.4581	17.4251	17.2167	lnc-AC112721.1.1-3	LNCipedia Identified Transcript//NONCODE class 'Exonic', Ensembl Cross Reference: ENST00000468792 Name: COL6A3	---	---	---	lnc-AC112721.1.1-3:1	NonCoding	NONHSAT077640	---	---	---	chr2	-	237338940	237340602	2q37.3
TC21000425.hg.4	0.00344527	up	13.1943	9.67259	5.11263	5.83357	5.63828	8.20759	11.0781	10.0443	11.2181	10.6364	10.097	RUNX1-IT1	RUNX1 intronic transcript 1 (non-protein coding)	---	80215	---	---	NonCoding	---	---	uc011adz.2	NR_026812	chr21	-	35037936	35039426	21q22.12
TC2200001091.oe.1	0.00181158	up	12.8024	5.84403	4.56859	6.07338	4.95339	4.28619	11.0332	9.25547	9.17185	6.69414	7.9626	lnc-SSTR3-2	LNCipedia Identified Transcript//NONCODE class 'Exonic', Ensembl Cross Reference: ENST00000417990 Name: Z82188.1	---	---	---	lnc-SSTR3-2:1	NonCoding	NONHSAT085150	---	---	---	chr22	-	37225264	37225995	22q13.1
TC0100001152.oe.1	0.000875	up	12.6209	6.35893	6.26018	8.08645	6.23498	7.68966	12.5459	9.95155	11.1315	9.09427	10.1957	lnc-IFI44-3	LNCipedia Identified Transcript//NONCODE class 'Exonic', Ensembl Cross Reference: ENST00000476911 Name: IFI44	---	---	---	lnc-IFI44-3:1	NonCoding	NONHSAT004080	---	---	---	chr1	+	78662616	78664078	1p31.1
TC1500001944.oe.1	7.63e-05	up	12.548	8.04163	6.78714	8.48698	6.79638	8.76391	11.4888	11.0375	12.3076	10.7663	11.5228	lnc-TSPAN3-2	LNCipedia Identified Transcript//NONCODE class 'Exonic'	---	---	---	lnc-TSPAN3-2:1	NonCoding	NONHSAT047424	---	---	---	chr15	-	77108869	77109184	15q24.3
TC0500002177.oe.1	0.000797	up	12.5114	5.05045	4.58914	5.23876	5.32752	5.47574	10.6116	7.46292	10.2152	8.14719	7.4706	lnc-MOCS2-9	LNCipedia Identified Transcript//NONCODE class 'Exonic'	---	---	---	lnc-MOCS2-9:1	NonCoding	NONHSAT101365	---	---	---	chr5	-	50396481	50396809	5q11.1
TC0500003248.oe.1	5.12e-05	up	12.3425	9.10775	8.54203	7.81396	7.55254	9.71172	12.1412	11.6167	12.8544	11.7241	12.5193	lnc-UBTD2-1	NONCODE class 'Exonic', Ensembl Cross Reference: ENST00000523651 Name: SH3PXD2B//LNCipedia Identified Transcript	---	---	---	lnc-UBTD2-1:1	NonCoding	NONHSAT105114	---	---	---	chr5	-	172333499	172334235	5q35.1
TC1700002231.oe.1	1.69e-06	up	11.8555	5.73755	4.34479	4.85237	4.97575	5.37843	9.10843	8.29094	8.83805	8.24007	8.64884	lnc-SLFN12-6	NONCODE class 'Exonic', Ensembl Cross Reference: ENST00000586099 Name: SLFN11//LNCipedia Identified Transcript	---	---	---	lnc-SLFN12-6:1	NonCoding	NONHSAT053086	---	---	---	chr17	-	35360019	35362992	17q12
TC0500003064.oe.1	0.000591	up	11.6633	5.03012	4.14946	5.62822	4.13071	5.20302	10.4155	7.8467	8.79604	7.61949	7.18335	lnc-PDGFRB-2	LNCipedia Identified Transcript//NONCODE class 'Exonic', Ensembl Cross Reference: ENST00000513609 Name: CSF1R	---	---	---	lnc-PDGFRB-2:1	NonCoding	NONHSAT104535	---	---	---	chr5	-	150059778	150067181	5q32
TC0100001457.oe.1	0.006254	up	11.5487	6.63726	6.02707	6.36036	5.77809	6.64509	13.2462	9.15011	10.2897	7.86489	8.54533	lnc-CEPT1-2	NONCODE class 'Exonic', Ensembl Cross Reference: ENST00000464329 Name: CD53//LNCipedia Identified Transcript//NONCODE class 'Exonic', Ensembl Cross Reference: ENST00000497404 Name: CD53	---	---	---	lnc-CEPT1-2:1	NonCoding	NONHSAT005149//NONHSAT005150	---	---	---	chr1	+	110894309	110899851	1p13.3
TC0700002612.oe.1	0.00116664	up	11.3539	3.26051	3.89685	4.08371	3.48382	5.22427	9.56552	6.69023	8.27266	6.15591	6.79042	lnc-LAMB4-2	LNCipedia Identified Transcript//NONCODE class 'Sense No Exonic'	---	---	---	lnc-LAMB4-2:1	NonCoding	NONHSAT122723	---	---	---	chr7	-	107948414	107950027	7q31.1
TC0200004870.oe.1	0.00376946	up	11.2467	13.4738	9.69769	10.9226	10.4825	12.6954	13.0214	14.9117	15.7709	15.6268	15.3983	lnc-COL6A3-7	LNCipedia Identified Transcript//NONCODE class 'Exonic', Ensembl Cross Reference: ENST00000473258 Name: COL6A3	---	---	---	lnc-COL6A3-7:1	NonCoding	NONHSAT077638	---	---	---	chr2	-	237324003	237330180	2q37.3
TC1200002181.oe.1	0.0441971	up	11.192	16.0933	10.1177	10.9021	12.2695	13.1904	12.2713	17.4185	15.3014	17.7286	17.2752	lnc-VDR-1	LNCipedia Identified Transcript//NONCODE class 'Exonic', Ensembl Cross Reference: ENST00000546974 Name: COL2A1	---	---	---	lnc-VDR-1:1	NonCoding	NONHSAT027965	---	---	---	chr12	-	47975353	47977445	12q13.11
TC0400001124.oe.1	0.000193	up	11.1838	6.40279	6.01144	6.42091	6.52623	6.05509	9.5627	10.5303	9.44655	8.09508	11.1985	lnc-EDNRA-2	LNCipedia Identified Transcript//endothelin receptor type A (EDNRA), transcript variant 4, non-coding RNA.//NONCODE class 'Exonic'	---	---	---	lnc-EDNRA-2:1	NonCoding	NONHSAT098681	---	---	NR_045958	chr4	+	147480917	147544954	4q31.23
TC0200004360.oe.1	5.24e-07	up	11.1766	3.78572	4.31111	3.94953	4.10409	3.77823	6.93984	7.67781	7.95884	6.94371	7.82052	lnc-CHRNA1-2	LNCipedia Identified Transcript//NONCODE class 'Exonic', Ensembl Cross Reference: ENST00000492964 Name: CHN1	---	---	---	lnc-CHRNA1-2:6	NonCoding	NONHSAT075584	---	---	---	chr2	-	174799897	174802057	2q31.1
TC0200004873.oe.1	0.00628044	up	11.1075	11.152	7.68581	8.26539	8.21598	9.4194	9.68812	12.5378	13.7201	13.3724	12.7874	lnc-AC112721.1.1-2	LNCipedia Identified Transcript//NONCODE class 'Exonic', Ensembl Cross Reference: ENST00000493475 Name: COL6A3	---	---	---	lnc-AC112721.1.1-2:1	NonCoding	NONHSAT077641	---	---	---	chr2	-	237357017	237357883	2q37.3
TC0200004751.oe.1	0.0157995	up	11.0705	12.5071	7.0696	6.40858	6.61614	8.3845	11.8532	11.2903	11.5041	11.7778	11.9037	lnc-WDFY1-2	NONCODE class 'Exonic', Ensembl Cross Reference: ENST00000473202 Name: SERPINE2//LNCipedia Identified Transcript	---	---	---	lnc-WDFY1-2:3	NonCoding	NONHSAT077159	---	---	---	chr2	-	223975153	223982780	2q36.1
TC0X00001279.oe.1	0.00660361	up	10.8946	11.868	7.90564	10.9774	8.72236	11.3833	11.7794	13.1568	14.6859	13.9	14.5624	RP6-99M1.3//NONHSAG054346//lnc-CXorf36-6	NONCODE class 'Linc', Ensembl Cross Reference: ENST00000602277 Name: RP6-99M1.3//LNCipedia Identified Transcript//N/A	ENST00000602277.1//ENST00000602277	---	---	lnc-CXorf36-6:1	NonCoding	NONHSAT136808	---	---	---	chrX	-	45764772	45765299	Xp11.3
TC0200001931.oe.1	0.0126753	up	10.8852	13.7967	9.50243	9.64061	9.84701	11.784	11.6619	14.7863	15.4194	15.1739	14.7507	lnc-GULP1-3	LNCipedia Identified Transcript//NONCODE class 'Exonic', Ensembl Cross Reference: ENST00000467886 Name: COL3A1//NONCODE class 'Exonic'	---	---	---	lnc-GULP1-3:1	NonCoding	NONHSAT076042//NONHSAT076041	---	---	---	chr2	+	189003423	189005463	2q32.2
TC0600002377.oe.1	0.00383876	up	10.8695	6.70556	6.30782	7.35866	7.79383	6.28263	13.1057	9.37443	11.1608	8.80223	9.21636	lnc-HLA-DMB-1	NONCODE class 'Exonic', Ensembl Cross Reference: ENST00000487996 Name: HLA-DMB//NONCODE class 'Exonic', Ensembl Cross Reference: ENST00000477537 Name: HLA-DMB//LNCipedia Identified Transcript	---	---	---	lnc-HLA-DMB-1:1	NonCoding	NONHSAT108949//NONHSAT108950	---	---	---	chr6	-	32934629	32936901	6p21.32
TC0800000673.oe.1	0.00108702	up	10.7805	10.6049	8.34433	8.66644	8.87258	8.51901	10.4958	13.0558	11.9285	13.5716	13.1073	lnc-C8orf34-7	LNCipedia Identified Transcript//NONCODE class 'Exonic', Ensembl Cross Reference: ENST00000526654 Name: SULF1	---	---	---	lnc-C8orf34-7:1	NonCoding	NONHSAT127133	---	---	---	chr8	+	69638811	69641147	8q13.3
TC1300001091.oe.1	2.11e-05	up	10.6314	6.74621	5.28456	6.13378	5.52473	6.44933	9.62709	8.7074	9.35004	9.16524	10.3401	lnc-MAB21L1-4	LNCipedia Identified Transcript//NONCODE class 'Exonic', Ensembl Cross Reference: ENST00000486239 Name: DCLK1	---	---	---	lnc-MAB21L1-4:1	NonCoding	NONHSAT033187	---	---	---	chr13	-	35805316	35808337	13q13.3
TC0600001356.oe.1	0.000522	up	10.5025	4.92414	4.04162	4.39956	4.37775	4.78914	6.30494	6.98746	9.12587	7.76506	9.3122	lnc-HSF2-4	gene_id XLOC_005452; transcript_id TCONS_00012593; oId TCONS_00038936; linc_name linc-HSF2-1; tss_id TSS8750; class_code u; gene_name linc-HSF2-1;//gene_id XLOC_005452; transcript_id TCONS_00011943; oId TCONS_00012065; linc_name linc-HSF2-1; tss_id TSS8750; class_code .; gene_name linc-HSF2-1;//LNCipedia Identified Transcript - Alternate transcript name(s): FPKM1_group_28325_transcript_1//NONCODE…	---	---	---	lnc-HSF2-4:2	NonCoding	NONHSAT114749//NONHSAT114750//NONHSAT114748	TCONS_00011943//TCONS_00011942//TCONS_00012593	---	---	chr6	+	121917345	121962421	6q22.31
TC0800000670.oe.1	0.00102657	up	10.4722	8.57122	6.72017	6.42957	6.81767	7.05336	8.66513	11.2981	9.75708	11.597	11.2171	lnc-C8orf34-4	LNCipedia Identified Transcript//NONCODE class 'Exonic', Ensembl Cross Reference: ENST00000528286 Name: SULF1	---	---	---	lnc-C8orf34-4:1	NonCoding	NONHSAT127125	---	---	---	chr8	+	69466817	69495850	8q13.2
TC0400002166.oe.1	0.00109365	up	10.3131	8.28757	6.20374	8.57598	7.15394	9.66634	11.5909	11.4339	12.3126	10.3856	10.9966	lnc-RP11-763F8.1.1-2	LNCipedia Identified Transcript//NONCODE class 'Antisense', Ensembl Cross Reference: ENST00000380638 Name: TMSB4XP8	---	---	---	lnc-RP11-763F8.1.1-2:1	NonCoding	NONHSAT097413	---	---	---	chr4	-	90838501	90839112	4q22.1
TC0200000906.oe.1	0.00049	up	10.2668	11.285	9.57569	11.4357	10.8384	12.321	15.0404	14.1152	15.4575	13.1828	14.4594	lnc-TMSB10-1	LNCipedia Identified Transcript//NONCODE class 'Exonic', PubMed Identifer: PMID:22140575 mixed_Pred29243	---	---	---	lnc-TMSB10-1:1	NonCoding	NONHSAT071961	---	---	---	chr2	+	84905639	84906675	2p11.2
TC0700002611.oe.1	8.31e-05	up	10.2611	6.94644	7.62054	8.02189	7.21571	8.62626	12.1153	10.6838	11.4792	10.0635	10.8845	lnc-LAMB4-3	LNCipedia Identified Transcript//NONCODE class 'Exonic', Ensembl Cross Reference: ENST00000470995 Name: LAMB1	---	---	---	lnc-LAMB4-3:1	NonCoding	NONHSAT122722	---	---	---	chr7	-	107935374	107937163	7q31.1
TC0700000245.oe.1	0.000195	up	10.2554	5.73407	6.29272	7.03086	6.36872	7.95836	9.58359	9.27721	11.2356	10.4101	9.66976	lnc-C7orf30-3	NONCODE class 'Exonic', Ensembl Cross Reference: ENST00000487890 Name: GPNMB//NONCODE class 'Exonic', Ensembl Cross Reference: ENST00000459927 Name: GPNMB//NONCODE class 'Exonic', Ensembl Cross Reference: ENST00000474157 Name: GPNMB//LNCipedia Identified Transcript	---	---	---	lnc-C7orf30-3:1	NonCoding	NONHSAT119519//NONHSAT119520//NONHSAT119521	---	---	---	chr7	+	23246766	23256910	7p15.3
TC0400000235.oe.1	0.00238827	up	10.2316	6.29507	6.20545	6.94671	5.85007	7.06525	12.4097	9.75867	8.85503	8.07487	10.039	lnc-PACRGL-7	LNCipedia Identified Transcript//NONCODE class 'Exonic', Ensembl Cross Reference: ENST00000509099 Name: SLIT2	---	---	---	lnc-PACRGL-7:1	NonCoding	NONHSAT095733	---	---	---	chr4	+	20533399	20539566	4p15.31
TC0900000657.oe.1	0.00783447	up	10.1056	6.71148	4.85619	8.0281	6.0621	8.81425	12.5549	9.09788	10.6071	9.26984	9.6278	lnc-CTSL1-8	LNCipedia Identified Transcript//NONCODE class 'Exonic', Ensembl Cross Reference: ENST00000463069 Name: DAPK1	---	---	---	lnc-CTSL1-8:1	NonCoding	NONHSAT132862	---	---	---	chr9	+	87639438	87640412	9q21.33
TC0X00000208.oe.1	0.00413153	up	10.0811	7.18316	7.09908	7.46831	5.94722	7.38662	12.8751	9.33458	11.5544	9.17247	8.81578	lnc-XK-2	NONCODE class 'Exonic', Ensembl Cross Reference: ENST00000492288 Name: CYBB//LNCipedia Identified Transcript	---	---	---	lnc-XK-2:1	NonCoding	NONHSAT136629	---	---	---	chrX	+	37798220	37804079	Xp11.4
TC0400001687.oe.1	0.000732	up	10.032	3.88866	4.2568	4.4827	4.30296	4.6021	9.63311	7.39411	6.59785	6.22056	8.32027	lnc-TAPT1-4	LNCipedia Identified Transcript//NONCODE class 'Exonic', Ensembl Cross Reference: ENST00000503829 Name: LDB2	---	---	---	lnc-TAPT1-4:1	NonCoding	NONHSAT095692	---	---	---	chr4	-	16585976	16626993	4p15.32
TC2100000770.oe.1	0.00418649	up	9.8426	9.58001	5.55848	6.03603	5.51443	7.86834	10.4841	9.62998	11.0068	10.2314	9.70022	RUNX1-IT1	LNCipedia Identified Transcript//NONCODE class 'Sense No Exonic'//RUNX1 intronic transcript 1 (non-protein coding) (RUNX1-IT1), long non-coding RNA.	---	---	---	RUNX1-IT1:1	NonCoding	NONHSAT081904	---	---	NR_026812	chr21	-	35037936	35039426	21q22.12
TC0500002062.oe.1	0.00825839	up	9.81797	3.81869	3.99084	4.28584	3.67697	5.5133	4.44208	8.06506	9.88313	7.29933	8.07316	lnc-SLC45A2-2	LNCipedia Identified Transcript//NONCODE class 'Linc'	---	---	---	lnc-SLC45A2-2:1	NonCoding	NONHSAT100959	---	---	---	chr5	-	33523536	33525166	5p13.3
TC1000000078.oe.1	0.000665	up	9.67546	8.06399	5.99291	7.0153	6.3051	8.32639	11.5434	9.99266	11.1843	9.68242	9.67262	lnc-AKR1C3-3	LNCipedia Identified Transcript//NONCODE class 'Exonic', Ensembl Cross Reference: ENST00000603484 Name: AKR1C3	---	---	---	lnc-AKR1C3-3:1	NonCoding	NONHSAT011139	---	---	---	chr10	+	5105275	5107686	10p15.1
TC0500000785.oe.1	0.000205	up	9.67522	6.5117	3.91197	4.36869	4.44634	4.95341	8.78925	8.41251	7.37515	7.85624	8.13042	lnc-XRCC4-5	LNCipedia Identified Transcript//NONCODE class 'Exonic', Ensembl Cross Reference: ENST00000503923 Name: VCAN	---	---	---	lnc-XRCC4-5:1	NonCoding	NONHSAT102517	---	---	---	chr5	+	83471618	83483604	5q14.2
TC2100000465.oe.1	1.03e-06	up	9.55364	4.93791	4.59157	4.65197	4.78255	4.8481	8.03655	8.26212	8.03831	7.15781	8.59757	lnc-PCBP3-5	LNCipedia Identified Transcript//NONCODE class 'Sense No Exonic', External ID: TCONS_00024700//NONCODE class 'Sense No Exonic', External ID: TCONS_00024701	---	---	---	lnc-PCBP3-5:1	NonCoding	NONHSAT082963//NONHSAT082964	---	---	---	chr21	+	45483805	45484746	21q22.3
TC1100001449.oe.1	0.00157138	up	9.54579	6.32082	5.93527	7.08461	5.48906	6.19255	11.0363	9.00841	10.2081	7.24287	9.801	lnc-SIDT2-1	LNCipedia Identified Transcript//NONCODE class 'Exonic'	---	---	---	lnc-SIDT2-1:1	NonCoding	NONHSAT024389	---	---	---	chr11	+	117203015	117204356	11q23.3
TC0700002633.oe.1	8.25e-05	up	9.34966	5.9683	6.15979	6.54925	5.94467	6.55706	10.6728	8.65498	10.2378	8.64723	9.09081	lnc-IMMP2L-4	LNCipedia Identified Transcript//NONCODE class 'Exonic', Ensembl Cross Reference: ENST00000492532 Name: DOCK4	---	---	---	lnc-IMMP2L-4:1	NonCoding	NONHSAT122775	---	---	---	chr7	-	111869460	111872347	7q31.1
TC0400002141.oe.1	0.0497435	up	9.31629	7.67931	6.28135	11.1233	6.79953	10.6986	14.1849	12.3325	10.6738	8.59638	12.8932	lnc-HSD17B11-3	LNCipedia Identified Transcript//NONCODE class 'Exonic'	---	---	---	lnc-HSD17B11-3:1	NonCoding	NONHSAT097316	---	---	---	chr4	-	87495008	87529209	4q22.1
TC0200004235.oe.1	0.0106057	up	9.16873	10.9384	6.50865	9.28605	8.99981	10.4985	10.4073	12.5396	13.909	12.9848	12.3745	lnc-GCG-2	NONCODE class 'Exonic', Ensembl Cross Reference: ENST00000465424 Name: FAP//LNCipedia Identified Transcript//NONCODE class 'Exonic', Ensembl Cross Reference: ENST00000465088 Name: FAP	---	---	---	lnc-GCG-2:1	NonCoding	NONHSAT075200//NONHSAT075199	---	---	---	chr2	-	162193559	162203145	2q24.2
TC0200004506.oe.1	4.67e-05	up	9.01688	5.4454	5.82806	5.54442	5.10433	5.23921	9.96347	8.35309	8.29353	7.67412	8.74036	lnc-STK17B-1	LNCipedia Identified Transcript//NONCODE class 'Exonic', Ensembl Cross Reference: ENST00000462290 Name: HECW2	---	---	---	lnc-STK17B-1:1	NonCoding	NONHSAT076184	---	---	---	chr2	-	196257736	196278679	2q32.3
TC1100001098.oe.1	0.00118405	up	8.98244	11.91	9.50175	10.5289	10.4396	10.8748	11.8506	14.2878	14.6059	13.7525	14.5936	lnc-MOGAT2-5	LNCipedia Identified Transcript//NONCODE class 'Exonic'	---	---	---	lnc-MOGAT2-5:1	NonCoding	NONHSAT023112	---	---	---	chr11	+	75572299	75572779	11q13.5
TC0200001716.oe.1	1.06e-06	up	8.92266	6.38335	6.02152	7.31579	6.24083	6.79557	9.89063	9.4651	9.75303	9.78144	9.65423	lnc-SCN2A-4	NONCODE class 'Exonic', Ensembl Cross Reference: ENST00000464503 Name: CSRNP3//LNCipedia Identified Transcript	---	---	---	lnc-SCN2A-4:1	NonCoding	NONHSAT075253	---	---	---	chr2	+	165469706	165566981	2q24.3
TC1300001618.oe.1	0.000147	up	8.89461	4.74591	4.24913	5.10503	4.20303	5.47681	7.32843	8.04133	8.24597	6.80234	9.12649	lnc-COL4A2-AS2-2//RP11-212E4.1//NONHSAG014172	LNCipedia Identified Transcript//NONCODE class 'Sense No Exonic'//N/A	ENST00000624845.1	---	---	lnc-COL4A2-AS2-2:1	NonCoding	NONHSAT035141	---	---	---	chr13	-	110265251	110266113	13q34
TC0200004234.oe.1	0.0100891	up	8.80626	14.3638	9.76221	12.5554	12.0039	13.7607	13.729	15.8552	16.4044	16.2914	15.8586	lnc-GCG-1	LNCipedia Identified Transcript//NONCODE class 'Exonic', Ensembl Cross Reference: ENST00000461506 Name: FAP	---	---	---	lnc-GCG-1:1	NonCoding	NONHSAT075198	---	---	---	chr2	-	162172841	162183583	2q24.2
TC0200004100.oe.1	0.00178833	up	8.7856	9.25581	6.45361	9.37496	7.70197	9.42073	12.3958	11.4548	12.3234	10.6685	11.0403	lnc-GTDC1-9	LNCipedia Identified Transcript//NONCODE class 'Exonic'	---	---	---	lnc-GTDC1-9:1	NonCoding	NONHSAT074757	---	---	---	chr2	-	144385475	144385990	2q22.3
TC0500003099.oe.1	0.00261005	up	8.75601	12.5906	10.2907	10.5564	10.6325	11.1076	11.845	14.7183	14.1886	14.9899	15.0875	lnc-ATOX1-2	LNCipedia Identified Transcript//NONCODE class 'Exonic', Ensembl Cross Reference: ENST00000521327 Name: SPARC	---	---	---	lnc-ATOX1-2:1	NonCoding	NONHSAT104622	---	---	---	chr5	-	151672597	151686975	5q33.1
TC1400000771.oe.1	1.7e-05	up	8.6613	5.27609	6.30472	6.72595	5.64724	6.12852	8.62291	8.60608	9.79826	9.38416	9.24402	lnc-RP11-497E19.2.1-4	NONCODE class 'Exonic', Ensembl Cross Reference: ENST00000553650 Name: FLRT2//LNCipedia Identified Transcript	---	---	---	lnc-RP11-497E19.2.1-4:1	NonCoding	NONHSAT038124	---	---	---	chr14	+	85623690	85626228	14q31.3
TC0600001687.oe.1	0.00283148	up	8.64543	7.1015	5.1135	5.83259	5.66429	6.93457	7.52192	8.56196	11.2123	8.9849	9.92504	lnc-C6orf99-2//NONHSAG045282//OTTHUMG00000015929//FNDC1-IT1	FNDC1 intronic transcript 1 (non-protein coding) [Source:HGNC Symbol;Acc:HGNC:41460]//LNCipedia Identified Transcript - Alternate transcript name(s): FNDC1-IT1-001//NONCODE class 'Sense No Exonic', External ID: TCONS_00032525 Name: FNDC1-IT1, Ensembl Cross Reference: ENST00000419703 Name: FNDC1-IT1	ENST00000419703.1//ENST00000419703	---	OTTHUMT00000042901.1	lnc-C6orf99-2:1	NonCoding	NONHSAT115835	---	---	---	chr6	+	159240786	159243329	6q25.3
TC0500003224.oe.1	0.0106879	up	8.6328	4.54141	3.82974	4.25446	3.55269	4.18259	10.3307	6.039	7.82828	4.88187	6.83015	lnc-KCNMB1-5	NONCODE class 'Exonic', Ensembl Cross Reference: ENST00000520322 Name: LCP2//LNCipedia Identified Transcript	---	---	---	lnc-KCNMB1-5:1	NonCoding	NONHSAT105044	---	---	---	chr5	-	170247572	170251692	5q35.1
TC0800000671.oe.1	0.000455	up	8.56705	9.77953	7.94768	8.42642	8.39177	8.48573	10.2602	12.4662	11.0432	12.4031	12.3523	lnc-C8orf34-5	LNCipedia Identified Transcript//NONCODE class 'Exonic', Ensembl Cross Reference: ENST00000525112 Name: SULF1//NONCODE class 'Exonic', Ensembl Cross Reference: ENST00000529041 Name: SULF1	---	---	---	lnc-C8orf34-5:1	NonCoding	NONHSAT127127//NONHSAT127126	---	---	---	chr8	+	69492832	69563877	8q13.2
TC0500003152.oe.1	0.0015664	up	8.50509	6.31715	5.77105	6.61145	5.63646	7.80753	11.4986	9.31768	8.80751	8.42002	9.54139	lnc-EBF1-3	LNCipedia Identified Transcript//NONCODE class 'Exonic'	---	---	---	lnc-EBF1-3:1	NonCoding	NONHSAT104805	---	---	---	chr5	-	158695902	158697268	5q33.3
TC0700001178.oe.1	0.0231818	up	8.36569	4.79622	4.24977	4.57534	4.28251	4.31883	9.46059	8.11946	4.77379	5.14098	10.0503	lnc-WNT16-6	NONCODE class 'Exonic', Ensembl Cross Reference: ENST00000468641 Name: PTPRZ1//LNCipedia Identified Transcript//NONCODE class 'Exonic', Ensembl Cross Reference: ENST00000489114 Name: PTPRZ1//NONCODE class 'Exonic', Ensembl Cross Reference: ENST00000483995 Name: PTPRZ1	---	---	---	lnc-WNT16-6:1	NonCoding	NONHSAT123019//NONHSAT123017//NONHSAT123018	---	---	---	chr7	+	122028218	122036632	7q31.32
TC0100000249.oe.1	8.29e-05	up	8.23188	4.79376	3.97588	5.10328	5.0996	5.70022	7.77791	7.10534	9.00917	8.07381	7.91262	lnc-C1orf196-3	LNCipedia Identified Transcript - Alternate transcript name(s): FPKM1_group_158_transcript_5//NONCODE class 'Linc', PubMed Identifer: PMID:23818866 FPKM1_group_158_transcrip	---	---	---	lnc-C1orf196-3:1	NonCoding	NONHSAT000998	---	---	---	chr1	+	14333425	14339151	1p36.21
TC0900001142.oe.1	0.000176	up	8.16698	6.97717	5.71463	6.91358	5.71555	7.63435	9.9779	9.69249	10.2339	8.69027	9.50975	lnc-TMSL4-1	NONCODE class 'Sense No Exonic', Ensembl Cross Reference: ENST00000323496 Name: TMSB4XP4//LNCipedia Identified Transcript	---	---	---	lnc-TMSL4-1:1	NonCoding	NONHSAT134945	---	---	---	chr9	+	128342153	128342770	9q34.11
TC1100002684.oe.1	0.000294	up	8.11498	6.8459	6.18726	6.32536	6.25302	7.17361	9.29669	8.76452	11.3519	9.06576	9.40926	lnc-PRKRIR-4	LNCipedia Identified Transcript//NONCODE class 'Exonic', Ensembl Cross Reference: ENST00000464145 Name: LRRC32	---	---	---	lnc-PRKRIR-4:1	NonCoding	NONHSAT023179	---	---	---	chr11	-	76657570	76665971	11q13.5
TC1000002633.oe.1	0.000131	up	8.10228	6.19602	5.18794	4.75603	4.70561	6.08699	7.69631	8.34502	8.76479	7.86117	9.35694	lnc-CLRN3-3	NONCODE class 'Exonic', Ensembl Cross Reference: ENST00000484853 Name: MKI67//LNCipedia Identified Transcript	---	---	---	lnc-CLRN3-3:1	NonCoding	NONHSAT016971	---	---	---	chr10	-	128111520	128112449	10q26.2
TC1200002182.oe.1	0.0309929	up	8.04361	10.2464	6.5451	6.66498	7.32542	7.71905	7.67517	11.9686	9.37164	12.448	12.0768	lnc-RP1-228P16.5.1-3	LNCipedia Identified Transcript//NONCODE class 'Exonic', Ensembl Cross Reference: ENST00000483376 Name: COL2A1	---	---	---	lnc-RP1-228P16.5.1-3:1	NonCoding	NONHSAT027966	---	---	---	chr12	-	47981343	47983855	12q13.11
TC1100002163.oe.1	0.000488	up	8.03542	7.33967	7.11717	7.71333	8.19693	7.92978	11.7852	11.2692	9.70103	9.26441	11.3088	lnc-SYT13-7	NONCODE class 'Exonic', Ensembl Cross Reference: ENST00000524774 Name: TP53I11//LNCipedia Identified Transcript	---	---	---	lnc-SYT13-7:1	NonCoding	NONHSAT018996	---	---	---	chr11	-	44934948	44936056	11p11.2
TC0200001954.oe.1	4.29e-05	up	7.93112	13.4953	11.8987	12.9172	12.8409	13.3687	15.1403	16.041	16.411	15.5238	16.3421	lnc-OBFC2A-13	LNCipedia Identified Transcript//NONCODE class 'Exonic', Ensembl Cross Reference: ENST00000496992 Name: MYO1B	---	---	---	lnc-OBFC2A-13:1	NonCoding	NONHSAT076119	---	---	---	chr2	+	191377522	191383339	2q32.3
TC1000001834.oe.1	0.0257445	up	7.85304	6.43644	5.91791	7.10749	6.20622	7.75045	13.2893	8.67376	10.3751	7.21827	8.72832	lnc-C10orf10-6	LNCipedia Identified Transcript//NONCODE class 'Exonic'	---	---	---	lnc-C10orf10-6:1	NonCoding	NONHSAT013031	---	---	---	chr10	-	44376885	44377100	10q11.21
TC1100002308.oe.1	0.0107749	up	7.85219	5.42361	5.52001	6.0754	4.89825	5.59563	11.656	7.61231	9.05853	6.83829	7.21326	lnc-MS4A6A-1	NONCODE class 'Exonic', Ensembl Cross Reference: ENST00000528925 Name: MS4A6A//NONCODE class 'Exonic', Ensembl Cross Reference: ENST00000526697 Name: MS4A6A//NONCODE class 'Exonic', Ensembl Cross Reference: ENST00000530179 Name: MS4A6A//LNCipedia Identified Transcript//NONCODE class 'Exonic', Ensembl Cross Reference: ENST00000526677 Name: MS4A6A//NONCODE class 'Exonic', Ensembl Cross Reference: E…	---	---	---	lnc-MS4A6A-1:2	NonCoding	NONHSAT021564//NONHSAT021562//NONHSAT021561//NONHSAT021563//NONHSAT021560	---	---	---	chr11	-	60177019	60184666	11q12.2
TC0300000928.oe.1	0.00017	up	7.70485	4.99847	4.49091	5.6368	4.55182	5.66686	9.0755	7.05446	8.63461	7.58177	7.72736	lnc-ABHD10-2	LNCipedia Identified Transcript//NONCODE class 'Exonic', Ensembl Cross Reference: ENST00000491694 Name: PHLDB2	---	---	---	lnc-ABHD10-2:1	NonCoding	NONHSAT091153	---	---	---	chr3	+	111939527	111945440	3q13.2
TC1000002621.oe.1	0.0132547	up	7.69822	7.56085	5.99908	5.21204	5.14661	6.87553	6.61729	8.59148	11.6137	9.351	9.34331	lnc-DHX32-3	NONCODE class 'Exonic', Ensembl Cross Reference: ENST00000485388 Name: ADAM12//LNCipedia Identified Transcript	---	---	---	lnc-DHX32-3:1	NonCoding	NONHSAT016933	---	---	---	chr10	-	126090736	126109788	10q26.2
TC0600002683.oe.1	0.00088	up	7.65944	8.95609	7.7362	9.0555	9.10352	8.483	9.97227	10.894	12.7288	12.1115	12.3139	lnc-COX7A2-1	LNCipedia Identified Transcript//NONCODE class 'Exonic', Ensembl Cross Reference: ENST00000511023 Name: COL12A1	---	---	---	lnc-COX7A2-1:1	NonCoding	NONHSAT113598	---	---	---	chr6	-	75089160	75101911	6q13
TC1800000129.oe.1	0.000499	up	7.65767	11.1828	8.74308	10.0153	9.05295	10.9713	12.7348	13.0073	13.5165	12.9659	12.4254	lnc-TXNDC2-7	LNCipedia Identified Transcript//NONCODE class 'Exonic', Ensembl Cross Reference: ENST00000577284 Name: RAB31//NONCODE class 'Exonic', Ensembl Cross Reference: ENST00000435762 Name: RAB31//NONCODE class 'Exonic', Ensembl Cross Reference: ENST00000580795 Name: RAB31	---	---	---	lnc-TXNDC2-7:1	NonCoding	NONHSAT057240//NONHSAT057234//NONHSAT057241	---	---	---	chr18	+	9775287	9859592	18p11.22
TC0200001956.oe.1	0.000221	up	7.62978	9.69784	8.5601	9.24085	8.14537	9.39474	11.2313	11.7232	12.7881	11.1503	12.8043	lnc-OBFC2A-11	NONCODE class 'Exonic', Ensembl Cross Reference: ENST00000461714 Name: MYO1B//LNCipedia Identified Transcript	---	---	---	lnc-OBFC2A-11:1	NonCoding	NONHSAT076120	---	---	---	chr2	+	191407658	191409073	2q32.3
TC0500002565.oe.1	0.000224	up	7.61521	4.39981	4.3372	3.6642	3.22345	3.51957	7.33128	5.9967	7.25814	5.60332	7.59922	lnc-FAM172A-10	LNCipedia Identified Transcript//NONCODE class 'Linc'	---	---	---	lnc-FAM172A-10:1	NonCoding	NONHSAT102799	---	---	---	chr5	-	93428289	93428640	5q15
TC0X00000463.oe.1	4.03e-05	up	7.5937	7.0176	5.51226	6.40666	6.21485	7.35456	9.44316	9.83898	9.74269	9.03871	9.06639	lnc-MSN-5	LNCipedia Identified Transcript//NONCODE class 'Exonic'	---	---	---	lnc-MSN-5:1	NonCoding	NONHSAT137359	---	---	---	chrX	+	66266855	66267394	Xq12
TC0500003098.oe.1	0.00113229	up	7.55329	16.2249	14.4541	14.7351	14.4883	15.1925	16.0476	18.7275	17.9568	18.3507	18.5979	lnc-ATOX1-3	LNCipedia Identified Transcript//NONCODE class 'Exonic', Ensembl Cross Reference: ENST00000537849 Name: SPARC//NONCODE class 'Exonic'	---	---	---	lnc-ATOX1-3:1	NonCoding	NONHSAT104621//NONHSAT104620	---	---	---	chr5	-	151666425	151667609	5q33.1
TC0400002616.oe.1	8.38e-05	up	7.50906	6.93176	6.17204	7.26006	5.59301	7.3449	10.324	9.54181	9.28685	9.07663	9.6157	lnc-C4orf46-4	LNCipedia Identified Transcript//NONCODE class 'Exonic', Ensembl Cross Reference: ENST00000589306 Name: FAM198B	---	---	---	lnc-C4orf46-4:1	NonCoding	NONHSAT098979	---	---	---	chr4	-	158130800	158173023	4q32.1
TC0700002374.oe.1	0.00045	up	7.37889	8.42113	7.08212	6.73523	6.46495	8.46906	9.81931	10.1789	11.3879	10.0992	10.1042	lnc-GNAT3-4	LNCipedia Identified Transcript//NONCODE class 'Exonic', Ensembl Cross Reference: ENST00000475955 Name: SEMA3C	---	---	---	lnc-GNAT3-4:1	NonCoding	NONHSAT121752	---	---	---	chr7	-	80796389	80798238	7q21.11
TC0600001488.oe.1	0.000668	up	7.24132	9.10828	8.06534	8.27825	7.79475	8.45573	12.4664	10.8893	11.1285	9.61784	11.8816	lnc-KIAA1244-2	LNCipedia Identified Transcript//NONCODE class 'Exonic'	---	---	---	lnc-KIAA1244-2:1	NonCoding	NONHSAT115190	---	---	---	chr6	+	137874861	137875744	6q23.3
TC1400001442.oe.1	0.000934	up	7.23358	7.32879	6.53615	7.11161	6.05198	7.65414	7.96725	9.99938	10.6689	10.4921	9.82862	lnc-NID2-5	LNCipedia Identified Transcript//NONCODE class 'Antisense'	---	---	---	lnc-NID2-5:1	NonCoding	NONHSAT036876	---	---	---	chr14	-	51998175	51999916	14q22.1
TC0700001883.oe.1	0.00053	up	7.14008	8.07273	6.13661	5.68138	5.65682	6.99912	8.63911	9.5915	9.88792	9.52558	9.08227	lnc-DFNA5-5	NONCODE class 'Exonic', Ensembl Cross Reference: ENST00000487020 Name: OSBPL3//LNCipedia Identified Transcript	---	---	---	lnc-DFNA5-5:4	NonCoding	NONHSAT119577	---	---	---	chr7	-	24800029	24815093	7p15.3
TC1600000863.oe.1	0.00416467	up	7.11153	3.16007	4.76519	5.25677	4.82276	6.49983	6.92682	6.74061	9.25081	8.36413	7.37306	RP11-212I21.3	N/A	ENST00000623886.1	---	---	---	NonCoding	---	---	---	---	chr16	+	55486618	55488777	16q12.2
TC0600000825.oe.1	0.000382	up	7.04455	4.74536	5.41677	6.1733	5.07054	5.02098	7.97669	8.3506	8.42455	6.6264	9.13125	lnc-ENPP4-3	NONCODE Identified Transcript, Ensembl Cross Reference: ENST00000483243 Name: RUNX2//NONCODE Identified Transcript, Ensembl Cross Reference: ENST00000473041 Name: RUNX2//runt-related transcription factor 2 (RUNX2), transcript variant 6, non-coding RNA.//NONCODE class 'Antisense,Exonic'//LNCipedia Identified Transcript//runt-related transcription factor 2 (RUNX2), transcript variant 5, non-coding …	---	---	---	lnc-ENPP4-3:1	NonCoding	NONHSAT112978//NONHSAT112980//NONHSAT112979	---	---	NR_103533//NR_103532	chr6	+	45328317	45372055	6p21.1
TC0500003213.oe.1	2.64e-05	up	7.01891	5.02462	5.68549	5.16111	5.78908	5.01662	7.9608	7.3961	9.0114	8.53198	7.83289	lnc-PANK3-14	LNCipedia Identified Transcript//NONCODE class 'Exonic', Ensembl Cross Reference: ENST00000518092 Name: SLIT3	---	---	---	lnc-PANK3-14:1	NonCoding	NONHSAT105000	---	---	---	chr5	-	168683966	168696311	5q34
TC0200004103.oe.1	0.00150416	up	7.0142	6.42417	4.33017	6.68847	5.52575	6.64325	9.91319	8.1531	9.40052	7.92266	8.27373	RP11-107E5.3//lnc-GTDC1-12//NONHSAG029466	LNCipedia Identified Transcript//NONCODE class 'Sense No Exonic'//N/A	ENST00000623674.1	---	---	lnc-GTDC1-12:1	NonCoding	NONHSAT074765	---	---	---	chr2	-	144494265	144496878	2q22.3
TC1700001589.oe.1	0.000127	up	6.98096	10.077	9.13302	9.0023	9.17424	9.97223	11.2802	13.101	12.8853	11.7905	12.319	lnc-RPH3AL-2	LNCipedia Identified Transcript//NONCODE class 'Exonic'	---	---	---	lnc-RPH3AL-2:1	NonCoding	NONHSAT144709	---	---	---	chr17	-	439982	442563	17p13.3
TC1800000130.oe.1	1.79e-05	up	6.97749	9.97118	8.5	8.97811	8.41456	9.6007	11.8625	11.8967	12.115	11.8201	11.7836	lnc-TXNDC2-6	NONCODE class 'Exonic', Ensembl Cross Reference: ENST00000577796 Name: RAB31//LNCipedia Identified Transcript//NONCODE class 'Exonic', Ensembl Cross Reference: ENST00000577371 Name: RAB31//NONCODE class 'Exonic', Ensembl Cross Reference: ENST00000580361 Name: RAB31	---	---	---	lnc-TXNDC2-6:1	NonCoding	NONHSAT057236//NONHSAT057235//NONHSAT057237	---	---	---	chr18	+	9814048	9845692	18p11.22
TC1200002795.oe.1	0.000343	up	6.92736	3.75056	3.89476	4.12189	3.44613	5.24571	8.08091	6.11022	7.20406	6.29709	6.72832	lnc-PMCH-4	NONCODE class 'Exonic', Ensembl Cross Reference: ENST00000481539 Name: IGF1//LNCipedia Identified Transcript	---	---	---	lnc-PMCH-4:1	NonCoding	NONHSAT030332	---	---	---	chr12	-	102402247	102415746	12q23.2
TC0500003074.oe.1	0.0374057	up	6.90944	5.89909	5.28955	7.29898	7.81734	6.67989	12.6065	7.38246	10.9352	8.34882	7.65479	lnc-RPS14-4	LNCipedia Identified Transcript//NONCODE class 'Exonic'	---	---	---	lnc-RPS14-4:1	NonCoding	NONHSAT104550	---	---	---	chr5	-	150403111	150403322	5q33.1
TC0700000833.oe.1	4.81e-05	up	6.87636	7.542	6.73266	6.9988	6.34762	7.75019	10.2175	10.4016	9.32237	9.23629	10.1017	lnc-CD36-3	LNCipedia Identified Transcript//NONCODE class 'Exonic'	---	---	---	lnc-CD36-3:1	NonCoding	NONHSAT121733	---	---	---	chr7	+	80218678	80219288	7q21.11
TC0700001884.oe.1	0.000168	up	6.86422	5.49089	4.37665	4.05856	4.47633	4.73886	6.44623	7.26673	8.27339	8.09607	6.95435	lnc-DFNA5-10	NONCODE class 'Exonic', Ensembl Cross Reference: ENST00000461835 Name: OSBPL3//LNCipedia Identified Transcript	---	---	---	lnc-DFNA5-10:1	NonCoding	NONHSAT119578	---	---	---	chr7	-	24842376	24849336	7p15.3
TSUnmapped00001214.oe.1	0.0195186	up	6.83619	4.75354	5.01572	4.79085	5.5024	5.37083	11.1562	6.5531	8.71875	6.04243	6.82882	lnc-NOTCH2-5	LNCipedia Identified Transcript	---	---	---	lnc-NOTCH2-5:2	NonCoding	---	---	---	---	---	---	---	---	---
TC0300002754.oe.1	0.00180693	up	6.79303	13.8795	11.0252	11.5924	11.7605	13.3354	14.1558	15.2184	15.4315	15.6295	14.978	lnc-LRRC58-3	LNCipedia Identified Transcript//NONCODE class 'Exonic', Ensembl Cross Reference: ENST00000468098 Name: FSTL1	---	---	---	lnc-LRRC58-3:1	NonCoding	NONHSAT091446	---	---	---	chr3	-	120404895	120411326	3q13.33
TC1200000851.oe.1	7.97e-05	up	6.71878	5.74165	5.89736	6.5475	6.78546	7.20004	9.84242	8.67948	9.57333	8.51367	9.30412	lnc-SRGAP1-1	LNCipedia Identified Transcript//NONCODE class 'Exonic'	---	---	---	lnc-SRGAP1-1:1	NonCoding	NONHSAT029130	---	---	---	chr12	+	64147112	64147833	12q14.2
TC0300001044.oe.1	0.0021029	up	6.71637	7.20325	3.98132	6.30542	5.0319	5.28613	8.86122	7.77993	8.38939	8.92218	7.59372	lnc-DTX3L-2	LNCipedia Identified Transcript//NONCODE class 'Exonic', Ensembl Cross Reference: ENST00000473627 Name: PARP15	---	---	---	lnc-DTX3L-2:1	NonCoding	NONHSAT091504	---	---	---	chr3	+	122621348	122632173	3q21.1
TC0200002091.oe.1	0.0366719	up	6.6968	12.2542	6.49425	8.76886	7.32903	9.53689	12.6779	10.7059	12.4883	11.7654	10.4631	lnc-PARD3B-4	NONCODE class 'Sense No Exonic', Ensembl Cross Reference: ENST00000315950 Name: AC007362.1//LNCipedia Identified Transcript	---	---	---	lnc-PARD3B-4:1	NonCoding	NONHSAT076526	---	---	---	chr2	+	205777816	205779709	2q33.3
TC1200000327.oe.1	2.03e-05	up	6.69546	5.72937	4.781	6.06962	4.81855	5.53204	7.69852	8.3345	8.55157	7.72645	8.33546	lnc-SLCO1C1-2	LNCipedia Identified Transcript//NONCODE class 'Exonic'	---	---	---	lnc-SLCO1C1-2:1	NonCoding	NONHSAT027230	---	---	---	chr12	+	20682297	20684072	12p12.2
TC1500000403.oe.1	0.003192	up	6.67956	8.3101	6.44525	7.78438	6.23251	8.79625	11.112	9.64708	11.3141	9.11047	10.0836	lnc-GALK2-2	LNCipedia Identified Transcript//NONCODE class 'Antisense,Exonic', Ensembl Cross Reference: ENST00000560704 Name: FGF7	---	---	---	lnc-GALK2-2:1	NonCoding	NONHSAT042379	---	---	---	chr15	+	49434396	49484520	15q21.2
TC0300000828.oe.1	0.000953	up	6.66696	5.19307	5.21429	5.19398	4.94162	5.53378	7.66999	7.59829	9.88312	6.65003	7.96044	lnc-COL8A1-3	NONCODE class 'Exonic', Ensembl Cross Reference: ENST00000463753 Name: COL8A1//LNCipedia Identified Transcript//NONCODE class 'Exonic', Ensembl Cross Reference: ENST00000483969 Name: COL8A1//NONCODE class 'Exonic', Ensembl Cross Reference: ENST00000474648 Name: COL8A1	---	---	---	lnc-COL8A1-3:1	NonCoding	NONHSAT090848//NONHSAT090847//NONHSAT090846	---	---	---	chr3	+	99638475	99703618	3q12.1
TC0100002255.oe.1	0.00167257	up	6.65861	9.19665	7.32524	7.64706	7.18102	8.28357	9.53169	10.1505	12.297	10.5945	10.7359	lnc-RGS2-1	NONCODE class 'Exonic', Ensembl Cross Reference: ENST00000483295 Name: RGS2//LNCipedia Identified Transcript//NONCODE class 'Exonic', Ensembl Cross Reference: ENST00000487236 Name: RGS2//NONCODE class 'Exonic', Ensembl Cross Reference: ENST00000464302 Name: RGS2	---	---	---	lnc-RGS2-1:1	NonCoding	NONHSAT008544//NONHSAT008545//NONHSAT008543	---	---	---	chr1	+	192809039	192811239	1q31.2
TC0600002542.oe.1	0.00194533	up	6.64014	4.40685	4.31956	4.43802	4.08261	4.93872	8.63765	7.50665	6.62611	5.20589	7.86552	lnc-PLA2G7-3	LNCipedia Identified Transcript//NONCODE class 'Exonic'	---	---	---	lnc-PLA2G7-3:1	NonCoding	NONHSAT113020	---	---	---	chr6	-	46858718	46859058	6p12.3
TC1100000683.oe.1	0.00318493	up	6.61277	5.93721	5.4806	6.30675	6.29146	5.94276	10.6114	8.08549	9.67804	6.98759	8.22256	lnc-MS4A5-3	LNCipedia Identified Transcript//NONCODE class 'Exonic', Ensembl Cross Reference: ENST00000528500 Name: MS4A7//NONCODE class 'Exonic', Ensembl Cross Reference: ENST00000528587 Name: MS4A7//NONCODE class 'Exonic', Ensembl Cross Reference: ENST00000528808 Name: MS4A7	---	---	---	lnc-MS4A5-3:1	NonCoding	NONHSAT021572//NONHSAT021570//NONHSAT021571	---	---	---	chr11	+	60378532	60393977	11q12.2
TC0800000423.oe.1	0.000235	up	6.60289	8.72526	8.17867	8.7409	7.29407	9.66934	11.0573	10.9174	11.9571	11.3007	10.9911	lnc-ADAM32-3	LNCipedia Identified Transcript//NONCODE class 'Exonic', Ensembl Cross Reference: ENST00000484143 Name: ADAM9	---	---	---	lnc-ADAM32-3:1	NonCoding	NONHSAT126140	---	---	---	chr8	+	39075888	39082726	8p11.22
TC0100000486.oe.1	0.000394	up	6.58432	6.87175	6.20026	5.87419	5.32609	6.03004	9.68174	8.10213	9.7283	8.54146	7.84387	lnc-PPP1R8-3	LNCipedia Identified Transcript//NONCODE class 'Exonic', Ensembl Cross Reference: ENST00000492877 Name: THEMIS2	---	---	---	lnc-PPP1R8-3:1	NonCoding	NONHSAT001921	---	---	---	chr1	+	27883398	27886673	1p35.3
TC0400000658.oe.1	0.000725	up	6.55787	7.84244	7.44953	8.09524	7.773	7.86417	12.2939	9.87003	10.9648	9.68295	9.77884	lnc-ANXA3-4	NONCODE class 'Exonic', Ensembl Cross Reference: ENST00000505725 Name: BMP2K//NONCODE class 'Exonic', Ensembl Cross Reference: ENST00000515075 Name: BMP2K//LNCipedia Identified Transcript	---	---	---	lnc-ANXA3-4:1	NonCoding	NONHSAT097087//NONHSAT097088	---	---	---	chr4	+	78850892	78865773	4q21.21
TC0400002820.oe.1	5.93e-05	up	6.4955	8.13697	7.01813	6.88999	6.70113	6.78364	9.02119	9.61686	9.87969	10.388	10.1214	lnc-MTNR1A-4	NONCODE class 'Exonic', Ensembl Cross Reference: ENST00000503253 Name: FAT1//LNCipedia Identified Transcript	---	---	---	lnc-MTNR1A-4:1	NonCoding	NONHSAT099671	---	---	---	chr4	-	186600331	186601700	4q35.2
TC1100003104.oe.1	0.000253	up	6.45023	5.66707	5.14335	4.8783	5.03881	5.73953	6.58475	7.62237	8.52772	8.68591	8.49305	lnc-USP2-2	NONCODE class 'Exonic'//NONCODE class 'Exonic', Ensembl Cross Reference: ENST00000584021 Name: THY1//LNCipedia Identified Transcript//NONCODE class 'Exonic', Ensembl Cross Reference: ENST00000533840 Name: THY1	---	---	---	lnc-USP2-2:1	NonCoding	NONHSAT024671//NONHSAT024669//NONHSAT024670	---	---	---	chr11	-	119418820	119423201	11q23.3
TC0200000335.oe.1	0.000445	up	6.42263	7.53757	5.79514	5.39285	5.46001	6.41058	8.34692	8.3839	9.71253	8.90512	8.6635	RP11-373D23.2//lnc-BRE-2//NONHSAG027354	NONCODE class 'Sense No Exonic', Ensembl Cross Reference: ENST00000604052 Name: RP11-373D23.2//LNCipedia Identified Transcript//N/A	ENST00000604052.1//ENST00000604052	---	---	lnc-BRE-2:1	NonCoding	NONHSAT069824	---	---	---	chr2	+	28396815	28397110	2p23.2
TC1600002293.oe.1	5.18e-05	up	6.40695	5.91997	6.0125	6.53104	4.86802	6.36173	8.50918	8.35814	9.30633	8.27549	8.64231	RP11-229O3.1	N/A	ENST00000624875.1	---	---	---	NonCoding	---	---	---	---	chr16	-	64981123	64983227	16q21
TC1100002760.oe.1	0.0127757	up	6.39932	10.618	7.23139	8.25989	7.35206	9.37572	10.8023	11.3891	11.9281	9.45515	12.652	lnc-CCDC89-2	LNCipedia Identified Transcript - Alternate transcript name(s): expReg_chr11_8280_-	---	---	---	lnc-CCDC89-2:1	NonCoding	---	---	---	---	chr11	-	85694324	85694600	11q14.1
TC0700000395.oe.1	0.00262138	up	6.38674	6.35159	5.13989	4.5493	4.37677	6.05303	6.59019	7.78817	9.21433	7.38586	8.86744	lnc-EEPD1-3	NONCODE class 'Exonic', Ensembl Cross Reference: ENST00000460598 Name: ANLN//NONCODE class 'Exonic', Ensembl Cross Reference: ENST00000495714 Name: ANLN//LNCipedia Identified Transcript	---	---	---	lnc-EEPD1-3:1	NonCoding	NONHSAT120126//NONHSAT120127	---	---	---	chr7	+	36403493	36417148	7p14.2
TC0600003065.oe.1	0.0109339	up	6.38335	9.53311	5.37897	5.61839	5.74013	6.80549	9.13846	8.61083	10.1928	9.37872	9.12686	lnc-SLC2A12-7	NONCODE class 'Exonic', Ensembl Cross Reference: ENST00000525700 Name: SGK1//NONCODE class 'Exonic', Ensembl Cross Reference: ENST00000490149 Name: SGK1//NONCODE class 'Exonic', Ensembl Cross Reference: ENST00000473704 Name: SGK1//NONCODE class 'Exonic', Ensembl Cross Reference: ENST00000524764 Name: SGK1//NONCODE class 'Exonic', Ensembl Cross Reference: ENST00000472859 Name: SGK1//LNCipedia Iden…	---	---	---	lnc-SLC2A12-7:1	NonCoding	NONHSAT115017//NONHSAT115015//NONHSAT115019//NONHSAT115018//NONHSAT115016//NONHSAT115020	---	---	---	chr6	-	134169248	134177847	6q23.2
TC0500003225.oe.1	0.0125633	up	6.3591	5.02738	5.27771	5.06209	4.6666	5.37139	10.8081	6.8898	8.03407	6.09861	6.9187	lnc-KCNMB1-4	LNCipedia Identified Transcript//NONCODE class 'Exonic', Ensembl Cross Reference: ENST00000523369 Name: LCP2	---	---	---	lnc-KCNMB1-4:1	NonCoding	NONHSAT105045	---	---	---	chr5	-	170256526	170258498	5q35.1
TC1200001827.oe.1	0.000266	up	6.35531	8.08896	6.81648	7.29916	6.74938	7.56719	10.4549	8.8046	10.8848	9.70455	10.0122	lnc-SLC2A14-4	NONCODE class 'Exonic', Ensembl Cross Reference: ENST00000541671 Name: SLC2A3//LNCipedia Identified Transcript//NONCODE class 'Exonic', Ensembl Cross Reference: ENST00000476634 Name: SLC2A3	---	---	---	lnc-SLC2A14-4:1	NonCoding	NONHSAT026277//NONHSAT026278	---	---	---	chr12	-	7932646	7936187	12p13.31
TC0700001323.oe.1	0.000908	up	6.3208	9.65516	6.93198	8.23711	8.01738	8.83825	10.7122	10.5175	11.9525	10.697	11.1013	lnc-AGBL3-4	NONCODE class 'Exonic', Ensembl Cross Reference: ENST00000489019 Name: CALD1//NONCODE class 'Exonic', Ensembl Cross Reference: ENST00000498254 Name: CALD1//LNCipedia Identified Transcript//NONCODE class 'Exonic', Ensembl Cross Reference: ENST00000475772 Name: CALD1	---	---	---	lnc-AGBL3-4:1	NonCoding	NONHSAT123473//NONHSAT123471//NONHSAT123475	---	---	---	chr7	+	134779634	134900053	7q33
TC0100001461.oe.1	0.0482932	up	6.31382	15.5419	10.0588	11.1602	11.3604	12.8104	16.6855	13.4105	15.3176	15.4327	13.3781	NONHSAG002397//lnc-CHIA-3	LNCipedia Identified Transcript//NONCODE class 'Exonic', Ensembl Cross Reference: ENST00000529459 Name: CHI3L2	---	---	---	lnc-CHIA-3:1	NonCoding	NONHSAT005171	---	---	---	chr1	+	111239306	111243438	1p13.2
TC0900002153.oe.1	0.000107	up	6.24477	6.48876	6.43929	6.90811	7.12392	7.52486	10.5301	9.35747	8.98259	8.85347	9.97457	lnc-TXNDC8-1	LNCipedia Identified Transcript//NONCODE class 'Exonic', Ensembl Cross Reference: ENST00000476205 Name: SVEP1	---	---	---	lnc-TXNDC8-1:1	NonCoding	NONHSAT133965	---	---	---	chr9	-	110376811	110379378	9q31.3
TC0100002527.oe.1	0.000905	up	6.15165	7.66184	5.10142	6.23865	5.64573	5.82554	8.52167	7.8944	9.33565	8.50979	9.31654	lnc-ATF3-3	LNCipedia Identified Transcript//NONCODE class 'Exonic', Ensembl Cross Reference: ENST00000492118 Name: ATF3	---	---	---	lnc-ATF3-3:1	NonCoding	NONHSAT009381	---	---	---	chr1	+	212613436	212620777	1q32.3
TC1200001707.oe.1	9.13e-05	up	6.15	7.98209	6.99678	6.64179	6.426	7.0739	9.1277	9.67988	10.0676	10.2931	9.05517	lnc-DCP1B-6	NONCODE class 'Antisense', External ID: TCONS_00008261//LNCipedia Identified Transcript//NONCODE class 'Antisense', External ID: TCONS_00008262	---	---	---	lnc-DCP1B-6:1	NonCoding	NONHSAT025451//NONHSAT025450	---	---	---	chr12	-	2255804	2256163	12p13.33
TC1900002384.oe.1	0.0100054	up	6.12333	9.66151	6.05833	6.29161	6.76722	8.40298	9.67661	9.50186	11.4083	10.1665	9.49994	lnc-CADM4-2	LNCipedia Identified Transcript//NONCODE class 'Exonic', Ensembl Cross Reference: ENST00000593396 Name: PLAUR	---	---	---	lnc-CADM4-2:1	NonCoding	NONHSAT066616	---	---	---	chr19	-	43656566	43661548	19q13.31
TC0100004976.oe.1	0.000588	up	6.10378	5.21507	5.0912	5.04388	4.36624	5.79998	6.9019	7.49051	8.97284	6.83446	8.36517	lnc-ZBTB41-8	LNCipedia Identified Transcript//NONCODE class 'Exonic'	---	---	---	lnc-ZBTB41-8:1	NonCoding	NONHSAT008614	---	---	---	chr1	-	197143956	197146535	1q31.3
TC0X00001097.oe.1	0.000116	up	6.05953	5.45356	4.94398	4.51991	4.72771	5.17254	6.61592	6.91178	7.87805	8.18849	8.21948	lnc-ARHGAP6-7	NONCODE Identified Transcript//LNCipedia Identified Transcript//NONCODE class 'Exonic'	---	---	---	lnc-ARHGAP6-7:3	NonCoding	NONHSAT136243//NONHSAT136236//NONHSAT136242//NONHSAT136245//NONHSAT136241//NONHSAT136237//NONHSAT136235//NONHSAT136238	---	---	---	chrX	-	10449391	10567162	Xp22.2
TC0500000856.oe.1	0.0038092	up	6.03447	6.46056	6.38235	7.72155	6.79869	5.7068	10.7759	8.97078	8.94171	7.45304	9.8947	lnc-ANKRD32-11	LNCipedia Identified Transcript//NONCODE class 'Exonic'	---	---	---	lnc-ANKRD32-11:1	NonCoding	NONHSAT102816	---	---	---	chr5	+	93594017	93594611	5q15
TC0400002475.oe.1	0.000383	up	6.02287	5.27996	5.29142	6.7099	4.9627	5.80661	9.12816	7.23374	8.48857	7.81706	8.33532	lnc-RNF150-4	LNCipedia Identified Transcript//NONCODE class 'Linc'	---	---	---	lnc-RNF150-4:1	NonCoding	NONHSAT098514	---	---	---	chr4	-	140861176	140864188	4q31.21
TC2100000175.oe.1	0.00227487	up	5.98564	9.05881	6.92994	8.51432	7.02033	9.35994	11.5907	10.2603	11.2735	10.0874	10.5791	lnc-C21orf7-5//AP000240.9	LNCipedia Identified Transcript//N/A	ENST00000609910//ENST00000609910.1	---	---	lnc-C21orf7-5:1	NonCoding	---	---	---	---	chr21	+	29359002	29359453	21q21.3
TC0800001157.oe.1	0.00240611	up	5.97617	5.375	5.67027	5.5552	5.74803	6.93281	8.50212	7.2012	10.1804	7.54446	8.74925	lnc-WISP1-15	NONCODE class 'Exonic', Ensembl Cross Reference: ENST00000522079 Name: KHDRBS3//LNCipedia Identified Transcript//NONCODE class 'Exonic', Ensembl Cross Reference: ENST00000522578 Name: KHDRBS3//NONCODE class 'Exonic', Ensembl Cross Reference: ENST00000522433 Name: KHDRBS3	---	---	---	lnc-WISP1-15:1	NonCoding	NONHSAT129288//NONHSAT129289//NONHSAT129292	---	---	---	chr8	+	135557456	135656513	8q24.23
TC1200001224.oe.1	4.57e-06	up	5.96918	8.54506	7.99469	8.41505	7.69993	8.2477	10.7872	10.728	10.0914	11.0938	11.0898	lnc-C12orf45-3	NONCODE class 'Exonic', PubMed Identifer: PMID:22140575 mixed_Pred12026 , PubMed Identifer: PMID:22140575 brain_Pred9823//LNCipedia Identified Transcript	---	---	---	lnc-C12orf45-3:1	NonCoding	NONHSAT030431	---	---	---	chr12	+	104758170	104762005	12q23.3
TC0500003157.oe.1	0.00227737	up	5.96356	6.65226	5.59673	6.81832	5.94732	7.47601	10.9046	8.1342	8.82652	8.48226	9.02396	lnc-RNF145-1	LNCipedia Identified Transcript//NONCODE class 'Sense No Exonic'	---	---	---	lnc-RNF145-1:1	NonCoding	NONHSAT104810	---	---	---	chr5	-	159043610	159045785	5q33.3
TC0500000699.oe.1	0.00455293	up	5.94552	5.97862	5.27042	5.68533	4.80068	5.68014	10.2671	6.94293	8.60224	7.03189	7.43009	lnc-F2R-5	LNCipedia Identified Transcript//NONCODE class 'Exonic', Ensembl Cross Reference: ENST00000504815 Name: IQGAP2	---	---	---	lnc-F2R-5:1	NonCoding	NONHSAT102240	---	---	---	chr5	+	76597074	76600878	5q13.3
TC0400001925.oe.1	0.00204471	up	5.92191	9.45034	6.2892	7.69651	7.23447	8.64339	10.484	10.8405	10.5896	9.86402	10.366	lnc-IGFBP7-1	NONCODE class 'Exonic', External ID: TCONS_00029941 Name: IGFBP7, Ensembl Cross Reference: ENST00000514062 Name: IGFBP7//LNCipedia Identified Transcript - Alternate transcript name(s): RP11-738E22.2-001//NONCODE class 'Exonic'//LNCipedia Identified Transcript - Alternate transcript name(s): RP11-738E22.2-002//LNCipedia Identified Transcript//insulin-like growth factor binding protein 7 [Source:HG…	ENST00000512512//ENST00000514062	---	OTTHUMT00000362249.1//OTTHUMT00000362250.1	lnc-IGFBP7-1:1	NonCoding	NONHSAT096540//NONHSAT096541	---	---	---	chr4	-	57030773	57110279	4q12
TC0800000424.oe.1	0.000329	up	5.89104	10.2166	9.02004	10.4461	9.80143	11.4457	12.4856	12.4654	13.3163	12.6237	12.8316	lnc-ADAM32-2	LNCipedia Identified Transcript//NONCODE class 'Exonic', Ensembl Cross Reference: ENST00000463437 Name: ADAM9	---	---	---	lnc-ADAM32-2:5	NonCoding	NONHSAT126141	---	---	---	chr8	+	39089785	39103629	8p11.22
TC0700001177.oe.1	0.0177111	up	5.83782	4.55072	3.84455	4.16743	4.15969	4.07394	8.08899	6.92551	4.37476	5.23455	8.89967	lnc-WNT16-5	NONCODE class 'Exonic', Ensembl Cross Reference: ENST00000483028 Name: PTPRZ1//LNCipedia Identified Transcript	---	---	---	lnc-WNT16-5:1	NonCoding	NONHSAT123016	---	---	---	chr7	+	122011208	122013312	7q31.32
TSUnmapped00001368.oe.1	0.000445	up	5.79733	8.61193	6.92066	6.80321	6.42672	7.19569	10.6446	9.56761	9.50514	9.31006	9.60776	lnc-POTEG-4	LNCipedia Identified Transcript	---	---	---	lnc-POTEG-4:9	NonCoding	---	---	---	---	---	---	---	---	---
TC1500000705.oe.1	0.00321394	up	5.76426	11.4001	9.17463	9.97144	9.60842	11.1129	11.2539	12.9164	13.9056	13.0829	12.7444	lnc-C15orf60-2	LNCipedia Identified Transcript//NONCODE class 'Exonic', Ensembl Cross Reference: ENST00000559465 Name: CD276//NONCODE class 'Exonic', Ensembl Cross Reference: ENST00000559978 Name: CD276	---	---	---	lnc-C15orf60-2:1	NonCoding	NONHSAT047153//NONHSAT047152	---	---	---	chr15	+	73709565	73714514	15q24.1
TC0200004758.oe.1	0.000487	up	5.75094	3.93427	5.05522	5.38139	4.59194	4.95777	8.15018	6.42579	8.07696	6.47378	7.41288	lnc-CUL3-1	LNCipedia Identified Transcript//NONCODE class 'Exonic', Ensembl Cross Reference: ENST00000489831 Name: DOCK10	---	---	---	lnc-CUL3-1:1	NonCoding	NONHSAT077173	---	---	---	chr2	-	224807245	224807933	2q36.2
TC0300001396.oe.1	0.00188966	up	5.66091	5.08579	4.98468	4.61424	4.70126	5.11385	8.10157	5.97748	9.09319	6.90336	6.92939	lnc-GMPS-6	NONCODE class 'Exonic', Ensembl Cross Reference: ENST00000477669 Name: MME//LNCipedia Identified Transcript	---	---	---	lnc-GMPS-6:1	NonCoding	NONHSAT092818	---	---	---	chr3	+	155112294	155115147	3q25.2
TC0400002819.oe.1	9.17e-05	up	5.65433	10.9069	9.53532	9.75267	9.29222	10.4857	12.0979	12.7532	12.0672	12.8159	12.7353	lnc-MTNR1A-3	LNCipedia Identified Transcript//NONCODE class 'Exonic', Ensembl Cross Reference: ENST00000507662 Name: FAT1//NONCODE class 'Exonic', Ensembl Cross Reference: ENST00000512347 Name: FAT1	---	---	---	lnc-MTNR1A-3:1	NonCoding	NONHSAT099669//NONHSAT099670	---	---	---	chr4	-	186597111	186598821	4q35.2
TC1700000634.oe.1	0.00126771	up	5.60809	3.70793	3.63647	4.07999	4.00213	3.74403	5.94248	5.87956	8.20252	5.21501	6.36853	lnc-CCL2-8	NONCODE class 'Exonic', Ensembl Cross Reference: ENST00000578429//LNCipedia Identified Transcript//NONCODE class 'Exonic', Ensembl Cross Reference: ENST00000582017 Name: CCL2	---	---	---	lnc-CCL2-8:1	NonCoding	NONHSAT053018//NONHSAT053019	---	---	---	chr17	+	34255218	34257203	17q12
TC1200002857.oe.1	2.08e-05	up	5.60138	6.85249	7.16572	6.15942	6.58244	6.45721	8.57254	8.73611	9.70492	9.0727	9.55993	lnc-SELPLG-2	LNCipedia Identified Transcript//NONCODE class 'Exonic', PubMed Identifer: PMID:22140575 mixed_Pred12066	---	---	---	lnc-SELPLG-2:1	NonCoding	NONHSAT030561	---	---	---	chr12	-	108589848	108598118	12q23.3
TSUnmapped00001834.oe.1	0.048539	up	5.55972	16.6349	11.3305	12.3624	12.6698	13.9937	17.5753	14.7427	16.2576	16.1618	14.629	lnc-CHIA-3	LNCipedia Identified Transcript	---	---	---	lnc-CHIA-3:1	NonCoding	---	---	---	---	---	---	---	---	---
TC1400001005.oe.1	0.0127585	up	5.55923	9.42127	8.42826	10.698	9.24843	10.5648	14.5852	10.914	12.0876	11.2159	11.9325	lnc-EXOC3L4-3	LNCipedia Identified Transcript//NONCODE class 'Exonic', Ensembl Cross Reference: ENST00000561217 Name: TNFAIP2	---	---	---	lnc-EXOC3L4-3:1	NonCoding	NONHSAT040137	---	---	---	chr14	+	103136403	103137432	14q32.32
TC0500003342.oe.1	0.000188	up	5.50044	5.91294	5.08774	5.2516	4.64679	5.78227	6.82757	8.10369	8.32315	8.34704	7.37761	lnc-GRM6-5	NONCODE class 'Exonic', Ensembl Cross Reference: ENST00000518335 Name: ADAMTS2//LNCipedia Identified Transcript//NONCODE class 'Exonic', Ensembl Cross Reference: ENST00000523450 Name: ADAMTS2	---	---	---	lnc-GRM6-5:1	NonCoding	NONHSAT105577//NONHSAT105576	---	---	---	chr5	-	179114289	179122839	5q35.3
TC1100002627.oe.1	0.00311024	up	5.46646	7.40563	6.56199	6.67769	7.31595	7.62401	11.0003	9.02909	10.6966	8.97688	8.13547	lnc-UCP3-4	NONCODE class 'Exonic', Ensembl Cross Reference: ENST00000545562 Name: UCP2//LNCipedia Identified Transcript	---	---	---	lnc-UCP3-4:1	NonCoding	NONHSAT022867	---	---	---	chr11	-	73975670	73977064	11q13.4
TC1100003095.oe.1	0.00549751	up	5.4526	8.73613	8.12307	8.40771	7.85008	8.28317	12.7115	10.9894	10.6227	8.7347	10.5766	lnc-C1QTNF5-6	LNCipedia Identified Transcript//NONCODE class 'Exonic', Ensembl Cross Reference: ENST00000524940 Name: MCAM	---	---	---	lnc-C1QTNF5-6:1	NonCoding	NONHSAT024642	---	---	---	chr11	-	119309887	119311118	11q23.3
TC1200001825.oe.1	0.00169951	up	5.43012	11.394	9.44272	10.3207	10.4845	10.9351	12.4494	11.9928	14.447	12.8315	13.0611	lnc-SLC2A14-2	LNCipedia Identified Transcript//NONCODE class 'Exonic', Ensembl Cross Reference: ENST00000543435 Name: SLC2A3	---	---	---	lnc-SLC2A14-2:1	NonCoding	NONHSAT026275	---	---	---	chr12	-	7919231	7919750	12p13.31
TC0900000399.oe.1	0.00131442	up	5.42919	4.55153	4.58019	4.9703	5.21752	4.44304	8.25856	7.9471	6.51975	5.65166	7.58919	lnc-ANKRD20A2-4	LNCipedia Identified Transcript//NONCODE class 'Linc', Ensembl Cross Reference: ENST00000417418 Name: RP11-216M21.6	---	---	---	lnc-ANKRD20A2-4:1	NonCoding	NONHSAT131288	---	---	---	chr9	+	40167392	40171327	9p11.2
TC1100003014.oe.1	4.51e-05	up	5.39325	4.55989	5.34667	4.96993	5.07616	5.15155	6.96715	6.85206	8.41059	7.53343	7.49674	lnc-CADM1-5	NONCODE class 'Exonic', Ensembl Cross Reference: ENST00000441886 Name: CADM1//NONCODE class 'Exonic', Ensembl Cross Reference: ENST00000545960 Name: CADM1//LNCipedia Identified Transcript//NONCODE class 'Exonic', Ensembl Cross Reference: ENST00000603607 Name: CADM1	---	---	---	lnc-CADM1-5:1	NonCoding	NONHSAT024299//NONHSAT024297//NONHSAT024296	---	---	---	chr11	-	115169218	115214694	11q23.3
TC0600001787.oe.1	0.0424594	up	5.35915	9.47348	4.67306	4.53413	5.13593	4.43323	8.43549	7.46436	7.75546	9.01006	7.69449	lnc-SMOC2-5	LNCipedia Identified Transcript//NONCODE class 'Linc', External ID: TCONS_00033655//gene_id XLOC_005549; transcript_id TCONS_00012022; oId TCONS_00012155; linc_name linc-C6orf120-6; tss_id TSS8898; class_code u; gene_name linc-C6orf120-6;	---	---	---	lnc-SMOC2-5:1	NonCoding	NONHSAT116170	TCONS_00012022	---	---	chr6	+	168965275	168967576	6q27
TC0400002275.oe.1	1.18e-06	up	5.33064	5.05349	5.01264	5.10687	4.82237	4.97364	6.9135	7.47988	7.11938	7.59209	7.9357	lnc-LEF1-1	NONCODE class 'Exonic', Ensembl Cross Reference: ENST00000505379 Name: LEF1//NONCODE class 'Exonic', Ensembl Cross Reference: ENST00000514444 Name: LEF1//NONCODE class 'Exonic', Ensembl Cross Reference: ENST00000503879 Name: LEF1//LNCipedia Identified Transcript - Alternate transcript name(s): predAs_engstrom06_AK123292_1//NONCODE class 'Exonic', Ensembl Cross Reference: ENST00000507470 Name: LEF…	---	---	---	lnc-LEF1-1:2	NonCoding	NONHSAT097735//NONHSAT097737//NONHSAT097739//NONHSAT097742//NONHSAT097738//NONHSAT097740//NONHSAT097734//NONHSAT097741//NONHSAT097736	---	---	---	chr4	-	108047573	108198372	4q25
TC0100001922.oe.1	0.00927633	up	5.31485	4.82319	4.5827	4.76276	4.93611	4.91643	9.4531	5.83537	8.2862	6.28653	6.21014	lnc-HSPA6-6	NONCODE class 'Exonic', Ensembl Cross Reference: ENST00000496692 Name: FCGR2C//LNCipedia Identified Transcript//NONCODE class 'Exonic', Ensembl Cross Reference: ENST00000502411 Name: FCGR2C//NONCODE class 'Exonic', Ensembl Cross Reference: ENST00000465075 Name: FCGR2C	---	---	---	lnc-HSPA6-6:1	NonCoding	NONHSAT007189//NONHSAT007187//NONHSAT007188	---	---	---	chr1	+	161581339	161591291	1q23.3
TC1500002193.oe.1	0.0173037	up	5.2859	5.34252	5.2712	6.57754	4.91209	6.07705	10.4268	8.1166	7.14514	5.96149	8.54114	lnc-AC016251.1-12	LNCipedia Identified Transcript//NONCODE class 'Linc'	---	---	---	lnc-AC016251.1-12:1	NonCoding	NONHSAT050228	---	---	---	chr15	-	96250321	96251048	15q26.2
TC1400001899.oe.1	0.000714	up	5.28402	4.98306	4.26511	3.34714	4.40989	5.0122	6.66118	6.23853	7.85342	7.24535	6.02709	lnc-FBLN5-1	NONCODE class 'Exonic', Ensembl Cross Reference: ENST00000556961 Name: FBLN5//LNCipedia Identified Transcript	---	---	---	lnc-FBLN5-1:1	NonCoding	NONHSAT039289	---	---	---	chr14	-	91869412	91874816	14q32.12
TSUnmapped00000930.oe.1	0.0253479	up	5.26745	4.77671	4.49392	4.17443	4.01849	4.60302	9.80208	5.72771	7.71334	5.39264	5.41631	lnc-LILRA4-1	LNCipedia Identified Transcript	---	---	---	lnc-LILRA4-1:2	NonCoding	---	---	---	---	---	---	---	---	---
TC1500001700.oe.1	0.000292	up	5.20993	5.53433	6.16394	5.20625	4.83972	4.74302	7.54112	7.31374	8.63918	7.97163	6.9279	NONHSAG017122//OTTHUMG00000172146//RP11-244F12.2//lnc-RPS27L-1	LNCipedia Identified Transcript - Alternate transcript name(s): RP11-244F12.2-001//NONCODE class 'Antisense', External ID: TCONS_00012318 Name: RP11-244F12.2, Ensembl Cross Reference: ENST00000558905 Name: RP11-244F12.2//N/A	ENST00000558905//ENST00000558905.1	---	OTTHUMT00000417108.1	lnc-RPS27L-1:1	NonCoding	NONHSAT046594	---	---	---	chr15	-	63070025	63071911	15q22.2
TC1400000085.oe.1	0.00882973	up	5.19668	6.5731	5.65158	6.69631	6.78069	7.90217	8.29034	7.57634	10.7821	10.1209	8.72208	lnc-MRPL52-2	NONCODE class 'Exonic', Ensembl Cross Reference: ENST00000547596 Name: MMP14//LNCipedia Identified Transcript//NONCODE class 'Exonic', Ensembl Cross Reference: ENST00000547074 Name: MMP14	---	---	---	lnc-MRPL52-2:1	NonCoding	NONHSAT035820//NONHSAT035821	---	---	---	chr14	+	22836560	22842468	14q11.2
TC1500001652.oe.1	0.000103	up	5.16445	8.40604	7.53571	7.92262	7.66621	8.8017	10.9553	9.87363	10.799	9.85853	10.6889	lnc-GTF2A2-6	NONCODE class 'Exonic', Ensembl Cross Reference: ENST00000558646 Name: MYO1E//LNCipedia Identified Transcript	---	---	---	lnc-GTF2A2-6:1	NonCoding	NONHSAT044162	---	---	---	chr15	-	59272246	59372871	15q22.2
TC0X00001099.oe.1	0.000806	up	5.16247	6.34405	5.42484	5.49878	5.43298	5.87419	6.62524	7.70491	8.72838	8.89834	8.45827	lnc-ARHGAP6-4	LNCipedia Identified Transcript//NONCODE class 'Exonic'	---	---	---	lnc-ARHGAP6-4:1	NonCoding	NONHSAT136247	---	---	---	chrX	-	10567552	10620551	Xp22.2
TC2000000456.oe.1	0.00599382	up	5.16104	5.11144	4.25629	4.96711	5.07743	6.78317	7.01552	6.84866	9.46048	7.67896	7.03013	lnc-WISP2-1	LNCipedia Identified Transcript//NONCODE class 'Exonic', Ensembl Cross Reference: ENST00000471629 Name: WISP2	---	---	---	lnc-WISP2-1:1	NonCoding	NONHSAT079913	---	---	---	chr20	+	44723657	44728509	20q13.12
TC0100004852.oe.1	0.00882954	up	5.15892	9.08371	6.58659	6.28656	5.72807	6.77244	8.15159	8.71765	10.3289	9.61582	9.47879	lnc-ANGPTL1-6	LNCipedia Identified Transcript//NONCODE class 'Exonic', Ensembl Cross Reference: ENST00000508127 Name: ABL2	---	---	---	lnc-ANGPTL1-6:1	NonCoding	NONHSAT007849	---	---	---	chr1	-	179131212	179143074	1q25.2
TC0100001921.oe.1	0.000331	up	5.14336	4.58079	4.43548	4.84779	4.36611	4.43386	8.04134	6.98954	7.35216	6.00367	6.09087	lnc-HSPA6-1	LNCipedia Identified Transcript - Alternate transcript name(s): NONHSAT007178	---	---	---	lnc-HSPA6-1:1	NonCoding	---	---	---	---	chr1	+	161526474	161527283	1q23.3
TC0600002619.oe.1	0.00479605	up	5.11645	7.60436	5.02223	6.27876	5.529	7.16657	7.53449	8.30762	9.71076	9.17602	8.64776	lnc-RAB23-6	RAB23, member RAS oncogene family (RAB23), transcript variant 6, non-coding RNA.//LNCipedia Identified Transcript//NONCODE class 'Exonic'	---	---	---	lnc-RAB23-6:1	NonCoding	NONHSAT113287	---	---	NR_103822	chr6	-	57186993	57222314	6p11.2
TC0900002331.oe.1	0.000433	up	5.10155	9.09516	7.19715	7.3924	7.97168	8.05208	11.0655	9.82915	10.4221	10.4108	9.7356	lnc-SH2D3C-2	LNCipedia Identified Transcript//NONCODE class 'Exonic', Ensembl Cross Reference: ENST00000480266 Name: ENG//NONCODE class 'Exonic', Ensembl Cross Reference: ENST00000486329 Name: ENG	---	---	---	lnc-SH2D3C-2:1	NonCoding	NONHSAT134851//NONHSAT134853	---	---	---	chr9	-	127817149	127825264	9q34.11
TC0500002150.oe.1	0.0154498	up	5.08288	7.37718	8.24333	10.1498	8.45222	10.1755	13.1856	10.8321	11.1728	10.0076	10.9282	lnc-C5orf39-8	NONCODE class 'Antisense,Exonic', Ensembl Cross Reference: ENST00000508937 Name: SEPP1//NONCODE class 'Antisense,Exonic', Ensembl Cross Reference: ENST00000514403 Name: SEPP1//NONCODE class 'Antisense,Exonic', Ensembl Cross Reference: ENST00000510650 Name: SEPP1//NONCODE class 'Antisense,Exonic', Ensembl Cross Reference: ENST00000505309 Name: SEPP1//LNCipedia Identified Transcript//NONCODE class …	---	---	---	lnc-C5orf39-8:1	NonCoding	NONHSAT101226//NONHSAT101230//NONHSAT101228//NONHSAT101227//NONHSAT101229//NONHSAT101225	---	---	---	chr5	-	42801105	42811893	5p12
TC1000001166.oe.1	0.00026	up	5.07808	10.8529	9.38757	10.363	9.9011	11.3236	12.9427	12.4542	12.9655	12.1934	12.994	lnc-MXI1-1	NONCODE class 'Exonic', Ensembl Cross Reference: ENST00000492162 Name: ADD3//LNCipedia Identified Transcript	---	---	---	lnc-MXI1-1:1	NonCoding	NONHSAT016335	---	---	---	chr10	+	110124240	110130393	10q25.2
TC0600002916.oe.1	0.00109667	up	5.07228	6.09064	5.29778	5.9128	7.00243	6.64353	9.52016	8.42398	8.42125	7.30976	8.98519	lnc-TRAF3IP2-2	LNCipedia Identified Transcript - Alternate transcript name(s): expReg_chr6_8819_-	---	---	---	lnc-TRAF3IP2-2:1	NonCoding	---	---	---	---	chr6	-	111767513	111767805	6q21
TC1700001143.oe.1	0.00184453	up	5.03342	13.3622	10.949	11.452	10.9297	12.3944	13.8927	13.6653	14.8621	14.0625	14.2624	lnc-VMP1-3	LNCipedia Identified Transcript//NONCODE class 'Exonic', Ensembl Cross Reference: ENST00000591782 Name: VMP1//NONCODE class 'Exonic', Ensembl Cross Reference: ENST00000587470 Name: VMP1//NONCODE class 'Exonic', Ensembl Cross Reference: ENST00000592790 Name: VMP1	---	---	---	lnc-VMP1-3:2	NonCoding	NONHSAT055029//NONHSAT055030//NONHSAT055028	---	---	---	chr17	+	59837628	59842255	17q23.1
TC0200001930.oe.1	0.0356952	up	5.0291	17.8575	14.4307	14.509	15.3958	17.4232	15.9818	18.7168	19.106	18.827	18.6362	lnc-GULP1-2	LNCipedia Identified Transcript//NONCODE class 'Exonic', Ensembl Cross Reference: ENST00000470167 Name: COL3A1	---	---	---	lnc-GULP1-2:1	NonCoding	NONHSAT076037	---	---	---	chr2	+	188974394	188985212	2q32.2
TC1000000977.oe.1	0.00680407	up	5.02221	5.624	4.5059	5.67387	5.5041	5.51652	9.67798	8.14481	7.26724	5.98259	7.39338	lnc-C10orf131-2	LNCipedia Identified Transcript//NONCODE class 'Exonic', Ensembl Cross Reference: ENST00000461927 Name: ENTPD1	---	---	---	lnc-C10orf131-2:1	NonCoding	NONHSAT015768	---	---	---	chr10	+	95839300	95842413	10q24.1
TC0900000680.oe.1	0.00488319	up	5.02081	8.26961	6.31355	6.94097	6.73157	7.52173	8.38321	9.69716	10.351	8.26884	10.7168	lnc-SECISBP2-1	LNCipedia Identified Transcript//NONCODE class 'Exonic'	---	---	---	lnc-SECISBP2-1:1	NonCoding	NONHSAT132953	---	---	---	chr9	+	89311294	89316422	9q22.2
TC0700002661.oe.1	0.000609	up	5.0166	4.40671	4.00399	4.58254	4.23403	4.04892	7.70621	6.2856	7.35538	6.07922	5.48332	lnc-AC106873.4.1-8	LNCipedia Identified Transcript//NONCODE class 'Exonic', Ensembl Cross Reference: ENST00000462828 Name: TFEC	---	---	---	lnc-AC106873.4.1-8:1	NonCoding	NONHSAT122855	---	---	---	chr7	-	115939949	115950894	7q31.2
TC0300000857.oe.1	0.00145785	up	5.01041	9.0411	7.13436	8.15224	8.21652	8.23243	11.4249	10.7034	10.4625	10.7313	9.07924	lnc-NFKBIZ-3	LNCipedia Identified Transcript - Alternate transcript name(s): FPKM1_group_21610_transcript_3//NONCODE class 'Linc', PubMed Identifer: PMID:23818866 FPKM1_group_21610_transcr	---	---	---	lnc-NFKBIZ-3:1	NonCoding	NONHSAT090916	---	---	---	chr3	+	101864213	101864800	3q12.3
TC1400000613.oe.1	0.00423203	up	4.99751	12.4385	9.26938	9.47704	10.0879	10.2319	13.1462	12.414	12.6301	12.753	12.1674	RP11-1046B16.3	N/A	ENST00000611191.1	---	---	---	NonCoding	---	---	---	---	chr14	+	69617122	69617648	14q24.1
TC0600002923.oe.1	1.91e-05	up	4.99709	9.94725	10.3155	11.3702	10.864	11.048	13.0498	12.9858	13.0203	13.1637	12.9308	lnc-TUBE1-5	NONCODE class 'Exonic', Ensembl Cross Reference: ENST00000524032 Name: LAMA4//LNCipedia Identified Transcript//NONCODE class 'Exonic', Ensembl Cross Reference: ENST00000423735 Name: LAMA4	---	---	---	lnc-TUBE1-5:1	NonCoding	NONHSAT114505//NONHSAT114507	---	---	---	chr6	-	112191719	112216754	6q21
TC0400002218.oe.1	0.0175899	up	4.98287	5.99282	5.79575	6.43599	5.86123	5.52776	10.603	8.39721	7.7032	5.87343	8.62157	lnc-EMCN-1	LNCipedia Identified Transcript//NONCODE class 'Exonic'	---	---	---	lnc-EMCN-1:1	NonCoding	NONHSAT097559	---	---	---	chr4	-	100395341	100397576	4q24
TC2200000466.oe.1	0.00100359	up	4.96333	8.68637	7.91464	8.89379	9.04594	9.73216	10.0172	11.3711	12.136	10.8478	11.4573	lnc-NOL12.1-1	LNCipedia Identified Transcript//NONCODE class 'Exonic', Ensembl Cross Reference: ENST00000464120 Name: LGALS1	---	---	---	lnc-NOL12.1-1:1	NonCoding	NONHSAT086623	---	---	---	chr22	+	37675652	37677228	22q13.1
TC0800000880.oe.1	0.00806495	up	4.96156	11.6356	10.519	10.8817	11.1186	12.3399	11.319	14.4524	14.2618	13.9904	14.025	lnc-C8orf47-2	LNCipedia Identified Transcript//NONCODE class 'Exonic', Ensembl Cross Reference: ENST00000523561 Name: MATN2	---	---	---	lnc-C8orf47-2:1	NonCoding	NONHSAT127893	---	---	---	chr8	+	98031442	98036158	8q22.2
TC1100002665.oe.1	0.000728	up	4.94642	7.14384	6.60285	6.70456	6.35188	6.6945	7.46608	9.08883	9.96264	9.11253	9.39947	lnc-MAP6-1	LNCipedia Identified Transcript - Alternate transcript name(s): ENST00000534545, OTTHUMT00000383738.1, RP11-939C17.2-001//NONCODE class 'Antisense', External ID: TCONS_00005889//LNCipedia Identified Transcript - Alternate transcript name(s): ENST00000531652, OTTHUMT00000383739.1, RP11-939C17.2-003//NONCODE class 'Antisense', External ID: TCONS_00005887//LNCipedia Identified Transcript - Alternate…	---	---	---	lnc-MAP6-1:1	NonCoding	NONHSAT023110//NONHSAT023109//NONHSAT023111	---	---	---	chr11	-	75571899	75572787	11q13.5
TC0400000647.oe.1	0.00043	up	4.91417	8.44271	7.5842	9.18974	7.60342	8.98946	10.9261	10.2635	11.3142	10.1389	10.6517	lnc-CCNG2-2	LNCipedia Identified Transcript//NONCODE class 'Exonic', Ensembl Cross Reference: ENST00000513373 Name: 11-Sep//NONCODE class 'Exonic', Ensembl Cross Reference: ENST00000513697 Name: 11-Sep//NONCODE class 'Exonic', Ensembl Cross Reference: ENST00000515671 Name: 11-Sep	---	---	---	lnc-CCNG2-2:1	NonCoding	NONHSAT097032//NONHSAT097034//NONHSAT097033	---	---	---	chr4	+	77030783	77040152	4q21.1
TC0200001955.oe.1	3.1e-06	up	4.90916	5.21365	5.23955	5.26343	5.78734	5.56095	7.24897	7.73016	8.25011	7.51143	7.80164	lnc-OBFC2A-12	LNCipedia Identified Transcript - Alternate transcript name(s): l_2009_chr2:192263425-192270385_placenta	---	---	---	lnc-OBFC2A-12:1	NonCoding	---	---	---	---	chr2	+	191398700	191417159	2q32.3
TC01001053.hg.4	0.000927	up	4.86129	5.43298	5.55306	6.36253	5.24841	5.57883	8.88469	7.90583	8.71899	7.2996	6.77341	EMBP1	embigin pseudogene 1	---	647121	---	---	NonCoding	---	BC127741	uc001eiu.1	NR_003955	chr1	+	121519112	121571888	1p11.2
TC0700000059.oe.1	0.000533	up	4.82797	7.97438	8.19957	7.98054	7.58357	8.00309	10.3138	10.0046	11.69	9.59629	9.49348	lnc-AMZ1-3	NONCODE class 'Exonic', Ensembl Cross Reference: ENST00000477439 Name: TTYH3//LNCipedia Identified Transcript	---	---	---	lnc-AMZ1-3:1	NonCoding	NONHSAT118815	---	---	---	chr7	+	2647956	2649987	7p22.3
TC0400000662.oe.1	0.000599	up	4.80106	7.40361	6.20997	6.67093	5.95769	7.07541	9.76979	8.77619	8.83471	7.88905	9.36464	lnc-ANXA3-8	LNCipedia Identified Transcript//NONCODE class 'Linc'	---	---	---	lnc-ANXA3-8:1	NonCoding	NONHSAT097093	---	---	---	chr4	+	78913230	78916363	4q21.21
TC0200003823.oe.1	0.000932	up	4.78993	6.55408	5.71247	5.57493	5.14465	5.89185	8.15203	7.72864	9.17591	6.85016	8.27126	NONHSAG028949//lnc-AC108463.1-2//OTTHUMG00000153694//AC017002.2	NONCODE class 'Linc', External ID: TCONS_00023173 Name: AC017002.2, Ensembl Cross Reference: ENST00000432268 Name: AC017002.2//N/A//LNCipedia Identified Transcript - Alternate transcript name(s): AC017002.2-001	ENST00000432268//ENST00000432268.1	---	OTTHUMT00000332148.1	lnc-AC108463.1-2:1	NonCoding	NONHSAT073657	---	---	---	chr2	-	111491943	111494811	2q13
TC0500003215.oe.1	0.000484	up	4.75071	4.32195	4.38084	4.63954	4.14639	4.33767	5.54704	6.0169	7.77912	6.67343	7.05062	lnc-PANK3-17	LNCipedia Identified Transcript//NONCODE class 'Sense No Exonic'	---	---	---	lnc-PANK3-17:1	NonCoding	NONHSAT105020	---	---	---	chr5	-	169154854	169156216	5q35.1
TC1100002916.oe.1	0.0162187	up	4.74599	5.50461	5.59094	5.99698	5.62318	6.4881	10.6338	7.48377	8.34656	6.29236	7.68084	lnc-CARD16-1	NONCODE class 'Exonic', Ensembl Cross Reference: ENST00000528424 Name: CASP1//LNCipedia Identified Transcript	---	---	---	lnc-CARD16-1:1	NonCoding	NONHSAT023950	---	---	---	chr11	-	105030854	105034358	11q22.3
TC1700000866.oe.1	0.000881	up	4.70156	9.41458	7.29723	8.63294	8.42933	8.93338	11.2345	10.9203	11.3419	10.3335	10.0431	lnc-GRN-1	LNCipedia Identified Transcript//NONCODE class 'Exonic'	---	---	---	lnc-GRN-1:1	NonCoding	NONHSAT053947	---	---	---	chr17	+	44352748	44353102	17q21.31
TC0400002241.oe.1	0.000433	up	4.69225	4.6917	4.913	5.25012	3.81256	4.63839	6.78196	6.44756	7.97358	6.19926	7.05482	lnc-BDH2-3	LNCipedia Identified Transcript//NONCODE class 'Exonic'	---	---	---	lnc-BDH2-3:1	NonCoding	NONHSAT097625	---	---	---	chr4	-	103138370	103140407	4q24
TC1200002179.oe.1	0.000467	up	4.67764	9.05723	9.15657	9.46402	9.28357	8.88137	12.4833	12.0509	10.4851	10.7686	11.1838	lnc-HDAC7-2	LNCipedia Identified Transcript//NONCODE class 'Exonic'	---	---	---	lnc-HDAC7-2:1	NonCoding	NONHSAT027957	---	---	---	chr12	-	47865053	47879044	12q13.11
TC0600002370.oe.1	0.0228539	up	4.66863	5.43541	3.83566	4.25266	4.01619	4.53791	9.2827	5.81591	7.22791	5.53479	5.33151	lnc-HLA-DRB1-3	LNCipedia Identified Transcript//NONCODE class 'Exonic', External ID: TCONS_00034102 Name: XXbac-BPG254F23.6, Ensembl Cross Reference: ENST00000443574 Name: XXbac-BPG254F23.6//NONCODE class 'Exonic', Ensembl Cross Reference: ENST00000460185 Name: HLA-DQB1//LNCipedia Identified Transcript - Alternate transcript name(s): OTTHUMT00000276134.1, XXbac-BPG254F23.6-001//N/A	ENST00000443574	---	---	lnc-HLA-DRB1-3:1	NonCoding	NONHSAT108922//NONHSAT108923	---	---	---	chr6	-	32659886	32662450	6p21.32
TC0500002574.oe.1	0.000591	up	4.66638	4.20791	4.14019	3.99943	4.21903	3.93773	7.36907	5.41761	6.32647	5.44274	7.05992	lnc-TTC37-4	NONCODE class 'Exonic', Ensembl Cross Reference: ENST00000512568 Name: MCTP1//LNCipedia Identified Transcript//NONCODE class 'Exonic', Ensembl Cross Reference: ENST00000513695 Name: MCTP1//NONCODE class 'Exonic', Ensembl Cross Reference: ENST00000513857 Name: MCTP1	---	---	---	lnc-TTC37-4:1	NonCoding	NONHSAT102835//NONHSAT102836//NONHSAT102838	---	---	---	chr5	-	94942350	95166175	5q15
TC0700002376.oe.1	3.56e-05	up	4.65862	9.83927	9.38706	9.25349	8.66505	9.70132	11.0628	11.4286	12.0981	11.8133	11.5429	lnc-GNAT3-7	NONCODE class 'Exonic', Ensembl Cross Reference: ENST00000487621 Name: SEMA3C//LNCipedia Identified Transcript//NONCODE class 'Exonic', Ensembl Cross Reference: ENST00000470581 Name: SEMA3C	---	---	---	lnc-GNAT3-7:1	NonCoding	NONHSAT121755//NONHSAT121754	---	---	---	chr7	-	80847260	80919183	7q21.11
TC12002129.hg.4	0.00694919	up	4.64904	6.77083	5.07141	6.02857	5.4664	7.33979	6.87142	8.21357	8.57686	9.71676	8.38305	FZD10-AS1	FZD10 antisense RNA 1 (head to head)	ENST00000509760//ENST00000505807//ENST00000537095	440119	---	---	NonCoding	---	AK056047	uc001uih.2//uc001uig.2	NR_033834	chr12	-	130150349	130162256	12q24.33
TC0100002292.oe.1	0.0287691	up	4.61775	6.39439	5.1737	5.29827	5.23148	5.43449	10.7839	6.77066	7.76642	6.47536	6.77194	lnc-NEK7-2	NONCODE class 'Exonic', Ensembl Cross Reference: ENST00000484135 Name: PTPRC//NONCODE class 'Exonic', Ensembl Cross Reference: ENST00000462363 Name: PTPRC//LNCipedia Identified Transcript//NONCODE class 'Exonic', Ensembl Cross Reference: ENST00000391970 Name: PTPRC//NONCODE class 'Exonic', Ensembl Cross Reference: ENST00000427110 Name: PTPRC	---	---	---	lnc-NEK7-2:2	NonCoding	NONHSAT008643//NONHSAT008650//NONHSAT008645//NONHSAT008644	---	---	---	chr1	+	198639073	198703874	1q31.3
TC0500002722.oe.1	0.000923	up	4.61294	4.69928	4.70556	4.45286	4.22238	4.47046	7.77754	5.70106	6.85091	7.45515	5.79431	lnc-ATG12-7	NONCODE class 'Exonic', Ensembl Cross Reference: ENST00000503402 Name: SEMA6A//LNCipedia Identified Transcript	---	---	---	lnc-ATG12-7:1	NonCoding	NONHSAT103372	---	---	---	chr5	-	116482459	116487229	5q23.1
TC1800000257.oe.1	6.09e-05	up	4.61094	4.50175	5.19551	4.75109	4.68626	4.45554	7.7374	6.32542	7.24091	6.48639	6.82534	lnc-TTC39C-1	LNCipedia Identified Transcript//NONCODE class 'Exonic', Ensembl Cross Reference: ENST00000592442 Name: LAMA3	---	---	---	lnc-TTC39C-1:1	NonCoding	NONHSAT058678	---	---	---	chr18	+	23931155	23932585	18q11.2
TC0200000949.oe.1	0.00147724	up	4.59465	8.85447	6.92504	7.27664	7.37255	7.83879	10.1343	9.48349	10.6954	8.81191	10.1421	NONHSAG028438//LINC00152//lnc-PLGLB2-1//OTTHUMG00000130273	long intergenic non-protein coding RNA 152 (LINC00152), transcript variant 1, long non-coding RNA.//NONCODE class 'Linc', External ID: TCONS_00022713 Name: LINC00152, Ensembl Cross Reference: ENST00000414584 Name: LINC00152//NONCODE class 'Linc', External ID: TCONS_00021219 Name: LINC00152, Ensembl Cross Reference: ENST00000331944 Name: LINC00152//NONCODE class 'Linc', External ID: TCONS_00022717…	ENST00000413202.1//ENST00000603948.4//ENST00000413202//ENST00000603948//ENST00000409898//ENST00000414584.1//ENST00000414030//ENST00000409898.2//ENST00000629257.1//ENST00000423846//ENST00000331944//ENST00000414030.4//ENST00000331944.9//ENST00000423846.4//ENST00000612724.1//ENST00000414584//ENST00000409139.4//ENST00000455131//ENST00000419680//ENST00000437561.1//ENST00000455131.4//ENST00000437561//E…	---	OTTHUMT00000330387.3//OTTHUMT00000330386.4//OTTHUMT00000330385.4//OTTHUMT00000330392.1//OTTHUMT00000330393.4//OTTHUMT00000330384.3//OTTHUMT00000330390.3//OTTHUMT00000252606.5//OTTHUMT00000330391.2//OTTHUMT00000330388.4//OTTHUMT00000330389.2	lnc-PLGLB2-1:3//lnc-PLGLB2-1:9//lnc-PLGLB2-1:1//lnc-PLGLB2-1:15//lnc-PLGLB2-1:16//lnc-PLGLB2-1:6//lnc-PLGLB2-1:13//lnc-PLGLB2-1:14//lnc-PLGLB2-1:8//lnc-PLGLB2-1:2//lnc-PLGLB2-1:11//lnc-PLGLB2-1:12//lnc-PLGLB2-1:5//lnc-PLGLB2-1:4//lnc-PLGLB2-1:7//lnc-PLGLB2-1:10	NonCoding	NONHSAT072152//NONHSAT072153//NONHSAT072145//NONHSAT072142//NONHSAT072149//NONHSAT072143//NONHSAT072151//NONHSAT072147//NONHSAT072150//NONHSAT072144//NONHSAT072146//NONHSAT072156//NONHSAT072148	---	---	NR_024204//NR_024206//NR_024205	chr2	+	87455368	87606805	2p11.2
TC1100001750.oe.1	0.00184502	up	4.58622	8.44826	8.26587	7.55879	8.15896	7.42303	11.3628	9.86979	8.70459	10.4474	10.4568	NONHSAG007410//lnc-INS-IGF2-1//OTTHUMG00000009394//AC132217.4	NONCODE class 'Exonic', External ID: TCONS_00006987 Name: AC132217.4, Ensembl Cross Reference: ENST00000430034 Name: AC132217.4//LNCipedia Identified Transcript - Alternate transcript name(s): AC132217.4-001//N/A	ENST00000430034.1//ENST00000430034	---	OTTHUMT00000026052.1	lnc-INS-IGF2-1:1	NonCoding	NONHSAT017479	---	---	---	chr11	-	2129121	2129964	11p15.5
TC1200001233.oe.1	0.00971839	up	4.57888	3.81979	3.8229	3.97059	3.81833	3.61503	3.67759	6.75643	5.51968	7.21101	6.85691	lnc-C12orf75-6	LNCipedia Identified Transcript//NONCODE class 'Linc'	---	---	---	lnc-C12orf75-6:1	NonCoding	NONHSAT030458	---	---	---	chr12	+	105552904	105579408	12q23.3
TC0300003259.oe.1	0.000297	up	4.57167	7.10117	6.79697	6.87729	6.94614	7.72091	8.59555	8.94402	10.3754	8.87796	9.61314	lnc-ZMAT3-4	LNCipedia Identified Transcript//NONCODE class 'Exonic'	---	---	---	lnc-ZMAT3-4:1	NonCoding	NONHSAT093385	---	---	---	chr3	-	179017223	179020088	3q26.32
TC2200000934.oe.1	3.81e-05	up	4.56111	6.04115	5.6199	5.44306	5.69644	6.65057	8.17504	7.57081	8.58743	8.03593	8.02884	lnc-TPST2-1	LNCipedia Identified Transcript - Alternate transcript name(s): CTA-445C9.15-001//NONCODE class 'Linc', External ID: TCONS_00025244 Name: CTA-445C9.15, Ensembl Cross Reference: ENST00000564772 Name: CTA-445C9.15//LNCipedia Identified Transcript//N/A//NONCODE class 'Linc'	ENST00000564772	---	OTTHUMT00000420343.2	lnc-TPST2-1:1	NonCoding	NONHSAT084500//NONHSAT084499	---	---	---	chr22	-	26521983	26525036	22q12.1
TC0100000706.oe.1	0.0075869	up	4.55774	7.27313	6.7837	6.58238	6.16802	6.83856	11.1446	8.0219	9.11976	8.10964	8.1915	lnc-ZNF643-2	LNCipedia Identified Transcript//NONCODE class 'Exonic', Ensembl Cross Reference: ENST00000487871 Name: SMAP2	---	---	---	lnc-ZNF643-2:1	NonCoding	NONHSAT002636	---	---	---	chr1	+	40413977	40415369	1p34.2
TC1700000561.oe.1	0.016351	up	4.55696	6.91151	7.5755	8.00794	7.02414	8.16318	11.6095	8.93611	11.055	8.13601	8.88597	lnc-RNF135-3	LNCipedia Identified Transcript//NONCODE class 'Linc', Ensembl Cross Reference: ENST00000582674 Name: RNF135	---	---	---	lnc-RNF135-3:1	NonCoding	NONHSAT052844	---	---	---	chr17	+	30968785	30970307	17q11.2
TC0600002378.oe.1	0.0227299	up	4.55229	7.98208	8.6903	9.40792	10.2689	9.1632	13.6703	10.6369	11.8834	9.96646	10.2883	lnc-HLA-DMA-2	NONCODE class 'Exonic', Ensembl Cross Reference: ENST00000480785 Name: HLA-DMA//LNCipedia Identified Transcript	---	---	---	lnc-HLA-DMA-2:1	NonCoding	NONHSAT108951	---	---	---	chr6	-	32948613	32949671	6p21.32
TC1000002413.oe.1	0.000397	up	4.54941	8.58284	8.17607	7.96654	8.04873	8.63655	9.34739	11.3039	10.5205	10.1052	11.0622	lnc-ARL3-2	NONCODE class 'Exonic', Ensembl Cross Reference: ENST00000469683 Name: CYP17A1//LNCipedia Identified Transcript	---	---	---	lnc-ARL3-2:1	NonCoding	NONHSAT016147	---	---	---	chr10	-	102830948	102831703	10q24.32
TC1900002105.oe.1	0.00111427	up	4.53213	6.60564	5.6086	5.07623	6.46191	6.18354	7.65766	7.91159	9.39056	8.34267	7.53439	lnc-ANKRD27-9	LNCipedia Identified Transcript//NONCODE class 'Sense No Exonic', External ID: TCONS_00019760, Ensembl Cross Reference: ENST00000587007	---	---	---	lnc-ANKRD27-9:1	NonCoding	NONHSAT064137	---	---	---	chr19	-	31336998	31338924	19q12
TC0100001588.oe.1	0.00504861	up	4.48604	5.51389	5.26132	5.23487	5.74704	5.46587	8.85628	6.87978	9.00598	6.2236	7.08457	lnc-FAM72B-15	embigin pseudogene 1 (EMBP1), non-coding RNA.//LNCipedia Identified Transcript//NONCODE class 'Linc'//NONCODE class 'Linc', Ensembl Cross Reference: ENST00000458200 Name: EMBP1	---	---	---	lnc-FAM72B-15:1	NonCoding	NONHSAT005619//NONHSAT005620	---	---	NR_003955	chr1	+	121519112	121571888	1p11.2
TC0200000252.oe.1	0.00465066	up	4.48433	8.68125	6.68109	6.42408	6.71056	7.2757	7.94303	10.0077	9.23225	9.36214	10.052	lnc-AC010872.2.1-9	LNCipedia Identified Transcript - Alternate transcript name(s): l_1792_chr2:21723914-21725685_testes	---	---	---	lnc-AC010872.2.1-9:1	NonCoding	---	---	---	---	chr2	+	21501043	21502813	2p24.1
TC0800000112.oe.1	0.0374816	up	4.47115	9.6742	10.5939	9.01907	6.92969	7.20778	11.0294	9.45193	11.8329	11.9761	9.93751	lnc-FDFT1-1	LNCipedia Identified Transcript - Alternate transcript name(s): expReg_chr8_457_+	---	---	---	lnc-FDFT1-1:1	NonCoding	---	---	---	---	chr8	+	11844094	11844561	8p23.1
TC0700001388.oe.1	0.00775503	up	4.46033	5.53028	5.21866	6.3284	4.90696	5.09947	9.48084	7.39459	8.01937	6.43572	6.53901	lnc-CLEC2L-3	NONCODE class 'Exonic', Ensembl Cross Reference: ENST00000492560 Name: TBXAS1//LNCipedia Identified Transcript//NONCODE class 'Exonic', Ensembl Cross Reference: ENST00000476637 Name: TBXAS1	---	---	---	lnc-CLEC2L-3:2	NonCoding	NONHSAT123655//NONHSAT123656	---	---	---	chr7	+	139829249	139953517	7q34
TC0800001506.oe.1	0.0218513	up	4.45829	5.49343	5.73466	6.24026	6.25079	6.05145	10.744	6.88768	8.76739	7.30357	6.85037	lnc-GFRA2-4	NONCODE class 'Exonic', Ensembl Cross Reference: ENST00000522011 Name: DOK2//LNCipedia Identified Transcript	---	---	---	lnc-GFRA2-4:1	NonCoding	NONHSAT125437	---	---	---	chr8	-	21909834	21911075	8p21.3
TC17001223.hg.4	0.00317693	up	4.45085	6.99338	5.0706	5.04521	4.40496	5.43713	6.93548	7.27412	8.41706	7.99462	7.10039	FAM106A//FAM106CP	family with sequence similarity 106, member C pseudogene//family with sequence similarity 106, member A	ENST00000392176	80039//100129396	---	---	NonCoding	---	---	uc002gtz.2	NR_026809	chr17	-	18524566	18526846	17p11.2
TC0500003066.oe.1	0.00108285	up	4.45084	9.87511	10.0491	10.5558	9.84976	11.1134	11.1841	12.3036	13.3084	12.907	12.5105	lnc-CSF1R-1	NONCODE class 'Exonic', Ensembl Cross Reference: ENST00000520851 Name: PDGFRB//LNCipedia Identified Transcript	---	---	---	lnc-CSF1R-1:1	NonCoding	NONHSAT104538	---	---	---	chr5	-	150113842	150114958	5q32
TC0600003340.oe.1	9.41e-07	up	4.45049	4.92814	4.68622	5.24272	4.96079	4.64099	7.13857	6.89494	6.94125	6.78792	7.466	lnc-C6orf118-2	LNCipedia Identified Transcript//NONCODE class 'Exonic'	---	---	---	lnc-C6orf118-2:2	NonCoding	NONHSAT116002	---	---	---	chr6	-	165327486	165328978	6q27
TC1200001826.oe.1	0.00102033	up	4.44962	11.1134	9.8447	9.94389	10.0654	10.2941	12.0427	11.3751	13.5911	12.5913	12.4298	lnc-SLC2A14-3	LNCipedia Identified Transcript//NONCODE class 'Exonic'	---	---	---	lnc-SLC2A14-3:1	NonCoding	NONHSAT026276	---	---	---	chr12	-	7921547	7925908	12p13.31
TC0600002475.oe.1	0.0469894	up	4.44752	8.92245	5.74046	4.99775	4.44365	5.60677	7.56314	7.87992	9.80235	8.312	6.91867	lnc-TREML2-2	NONCODE class 'Exonic', Ensembl Cross Reference: ENST00000589882 Name: TREM1//LNCipedia Identified Transcript	---	---	---	lnc-TREML2-2:1	NonCoding	NONHSAT112729	---	---	---	chr6	-	41280191	41282066	6p21.1
TC1500000708.oe.1	0.00899037	up	4.44604	6.45106	5.83931	5.95857	6.66201	7.79656	7.61539	7.72453	10.502	8.98318	8.64502	lnc-LOXL1-2	LNCipedia Identified Transcript//NONCODE class 'Exonic', Ensembl Cross Reference: ENST00000562548 Name: LOXL1	---	---	---	lnc-LOXL1-2:1	NonCoding	NONHSAT047191	---	---	---	chr15	+	73947216	73952137	15q24.1
TC1700000294.oe.1	8.78e-07	up	4.43768	6.44338	6.55269	6.65644	6.6597	6.93782	8.81095	9.10887	9.01223	8.32048	8.74654	lnc-TRPV2-2	NONCODE class 'Exonic', Ensembl Cross Reference: ENST00000493434 Name: TRPV2//LNCipedia Identified Transcript//NONCODE class 'Exonic', Ensembl Cross Reference: ENST00000475513 Name: TRPV2	---	---	---	lnc-TRPV2-2:1	NonCoding	NONHSAT145914//NONHSAT145915	---	---	---	chr17	+	16433232	16437003	17p11.2
TC0500003067.oe.1	0.00406731	up	4.43666	7.93261	8.80354	8.77437	7.91945	9.64622	9.66667	10.391	11.7661	11.8073	10.1925	lnc-CSF1R-2	NONCODE class 'Exonic', Ensembl Cross Reference: ENST00000520229 Name: PDGFRB//LNCipedia Identified Transcript	---	---	---	lnc-CSF1R-2:1	NonCoding	NONHSAT104539	---	---	---	chr5	-	150124170	150125520	5q32
TC2100000822.oe.1	0.000165	up	4.41885	5.21903	4.83461	4.86329	5.12922	5.3104	7.56834	6.46924	7.85025	7.72477	6.4623	lnc-DSCR4-1//NONHSAG032837//OTTHUMG00000090613//AP001434.2	NONCODE class 'Antisense', External ID: TCONS_00024590 Name: AP001434.2, Ensembl Cross Reference: ENST00000444977 Name: AP001434.2//LNCipedia Identified Transcript - Alternate transcript name(s): AP001434.2-001//N/A	ENST00000444977//ENST00000444977.1	---	OTTHUMT00000207201.1	lnc-DSCR4-1:1	NonCoding	NONHSAT082083	---	---	---	chr21	-	38237217	38238201	21q22.13
TC0500002178.oe.1	0.00116086	up	4.41713	5.14982	5.14544	4.97037	4.97417	4.60857	7.10453	6.45921	8.75309	6.64774	6.59935	lnc-EMB-6	LNCipedia Identified Transcript//NONCODE class 'Exonic', Ensembl Cross Reference: ENST00000506190 Name: EMB	---	---	---	lnc-EMB-6:1	NonCoding	NONHSAT101366	---	---	---	chr5	-	50403256	50443248	5q11.1
TC0200004461.oe.1	0.00810394	up	4.41214	4.24295	4.2181	4.63543	4.73344	4.39159	8.4843	6.89216	5.98758	4.79887	6.766	lnc-TFPI-1	NONCODE class 'Exonic', Ensembl Cross Reference: ENST00000485973 Name: CALCRL//LNCipedia Identified Transcript//NONCODE class 'Exonic', Ensembl Cross Reference: ENST00000461244 Name: CALCRL//NONCODE class 'Exonic', Ensembl Cross Reference: ENST00000474212 Name: CALCRL//NONCODE class 'Exonic', Ensembl Cross Reference: ENST00000479784 Name: CALCRL	---	---	---	lnc-TFPI-1:1	NonCoding	NONHSAT076017//NONHSAT076016//NONHSAT076015//NONHSAT076019	---	---	---	chr2	-	187387338	187448253	2q32.1
TC0300002015.oe.1	0.00406528	up	4.37295	10.9829	9.49379	9.26475	8.77965	9.87761	10.446	11.473	12.5246	12.35	12.2481	lnc-HACL1-9	LNCipedia Identified Transcript//NONCODE class 'Exonic', Ensembl Cross Reference: ENST00000461696 Name: ANKRD28	---	---	---	lnc-HACL1-9:1	NonCoding	NONHSAT088495	---	---	---	chr3	-	15781437	15797979	3p25.1
TC0800000214.oe.1	0.00246497	up	4.37138	8.94916	6.89508	7.28547	7.77942	8.13091	8.97502	9.82191	10.868	10.4928	9.52272	lnc-SFTPC-3	NONCODE class 'Exonic', Ensembl Cross Reference: ENST00000523749 Name: BMP1//LNCipedia Identified Transcript	---	---	---	lnc-SFTPC-3:1	NonCoding	NONHSAT125467	---	---	---	chr8	+	22192090	22194506	8p21.3
TC0700001014.oe.1	0.000519	up	4.37094	7.03549	6.4571	6.96709	7.2986	7.74953	8.03385	9.2824	9.56922	9.89237	9.36968	lnc-FBXO24-1	NONCODE class 'Exonic', Ensembl Cross Reference: ENST00000468214 Name: PCOLCE//NONCODE class 'Exonic', Ensembl Cross Reference: ENST00000490909 Name: PCOLCE//LNCipedia Identified Transcript//NONCODE class 'Exonic', Ensembl Cross Reference: ENST00000482863 Name: PCOLCE//NONCODE class 'Exonic', Ensembl Cross Reference: ENST00000462260 Name: PCOLCE//NONCODE class 'Exonic', Ensembl Cross Reference: E…	---	---	---	lnc-FBXO24-1:1	NonCoding	NONHSAT122393//NONHSAT122396//NONHSAT122397//NONHSAT122395//NONHSAT122394	---	---	---	chr7	+	100603163	100605765	7q22.1
TC0400002818.oe.1	0.00148063	up	4.36512	13.0702	10.5876	11.3893	11.3194	11.6345	13.0354	13.8149	14.0344	14.1019	13.6445	lnc-MTNR1A-2	LNCipedia Identified Transcript//NONCODE class 'Exonic'	---	---	---	lnc-MTNR1A-2:1	NonCoding	NONHSAT099668	---	---	---	chr4	-	186589073	186595800	4q35.2
TC0600002925.oe.1	0.000338	up	4.35638	6.01046	6.15134	7.4501	7.05871	7.28818	9.38955	8.82824	9.22748	8.25556	8.87359	NONHSAG044627//RP1-142L7.8//lnc-TUBE1-7	LNCipedia Identified Transcript//NONCODE class 'Sense No Exonic', Ensembl Cross Reference: ENST00000605586 Name: RP1-142L7.8//N/A	ENST00000605586//ENST00000605586.1	---	---	lnc-TUBE1-7:1	NonCoding	NONHSAT114509	---	---	---	chr6	-	112234165	112234758	6q21
TC0600000621.oe.1	0.0273519	up	4.34791	4.38784	4.22796	4.33393	3.69923	4.30316	8.73787	5.00785	7.58049	5.19527	5.03225	lnc-HLA-DQA1-7	NONCODE class 'Antisense', External ID: TCONS_00032929//LNCipedia Identified Transcript//NONCODE class 'Antisense', External ID: TCONS_00032928	---	---	---	lnc-HLA-DQA1-7:1	NonCoding	NONHSAT108910//NONHSAT108916	---	---	---	chr6	+	32519397	32581831	6p21.32
TC0X00000809.oe.1	0.019576	up	4.34643	8.53496	5.38674	5.83008	5.61994	6.65225	7.00276	8.99095	8.03086	9.13969	9.45886	lnc-XIAP-9	LNCipedia Identified Transcript//NONCODE class 'Exonic', Ensembl Cross Reference: ENST00000460123 Name: GRIA3	---	---	---	lnc-XIAP-9:1	NonCoding	NONHSAT138420	---	---	---	chrX	+	123482723	123488942	Xq25
TSUnmapped00000128.oe.1	0.0014349	up	4.33142	7.28836	5.558	6.44163	5.65677	6.75219	9.58524	8.11555	8.15436	7.89797	8.51803	LINC01296	LNCipedia Identified Transcript	---	---	---	LINC01296:18	NonCoding	---	---	---	---	---	---	---	---	---
TC0200001888.oe.1	0.00416405	up	4.31395	4.90504	4.54061	5.00498	4.72279	4.05885	8.39721	6.168	7.13602	5.36944	6.70666	lnc-SSFA2-2	NONCODE class 'Exonic', Ensembl Cross Reference: ENST00000468948 Name: ITGA4//LNCipedia Identified Transcript	---	---	---	lnc-SSFA2-2:1	NonCoding	NONHSAT075874	---	---	---	chr2	+	181523335	181524365	2q31.3
TC0600003029.oe.1	0.00104493	up	4.30803	5.5881	4.99734	5.79396	5.35289	5.68236	8.67834	6.76834	8.40112	7.19974	6.90225	lnc-C6orf191-3	NONCODE class 'Exonic', Ensembl Cross Reference: ENST00000463225 Name: ARHGAP18//LNCipedia Identified Transcript	---	---	---	lnc-C6orf191-3:1	NonCoding	NONHSAT114890	---	---	---	chr6	-	129578419	129598961	6q22.33
TC1400000137.oe.1	0.00048	up	4.30472	8.41022	7.2805	7.30172	7.02506	7.96544	9.10761	9.16792	10.5809	9.93155	9.72455	lnc-NYNRIN-1	NONCODE class 'Exonic', Ensembl Cross Reference: ENST00000555821 Name: NFATC4//LNCipedia Identified Transcript	---	---	---	lnc-NYNRIN-1:1	NonCoding	NONHSAT036055	---	---	---	chr14	+	24376074	24378056	14q12
TC0100003408.oe.1	0.00564329	up	4.30245	8.98586	9.56572	9.64065	10.5828	10.0549	10.1903	12.3517	11.3401	12.908	12.5657	lnc-BAI2-2	LNCipedia Identified Transcript//NONCODE class 'Exonic', Ensembl Cross Reference: ENST00000532877 Name: COL16A1	---	---	---	lnc-BAI2-2:1	NonCoding	NONHSAT002132	---	---	---	chr1	-	31698490	31704060	1p35.2
TC0200004612.oe.1	0.000533	up	4.28873	6.94973	5.73873	6.9148	6.96306	7.38747	9.52828	8.58361	9.50359	8.41559	8.42548	lnc-MDH1B-8	Kruppel-like factor 7 (ubiquitous) (KLF7), transcript variant 5, non-coding RNA.//LNCipedia Identified Transcript//NONCODE Identified Transcript, Ensembl Cross Reference: ENST00000467833 Name: KLF7//NONCODE class 'Exonic'	---	---	---	lnc-MDH1B-8:1	NonCoding	NONHSAT076575//NONHSAT076577	---	---	NR_073108	chr2	-	207074138	207166186	2q33.3
TC0500003223.oe.1	0.0380436	up	4.28739	4.7903	4.70403	5.02456	4.48934	5.43319	10.012	5.90979	7.36329	5.24813	6.40874	lnc-LCP2-3	LNCipedia Identified Transcript//NONCODE class 'Linc'	---	---	---	lnc-LCP2-3:1	NonCoding	NONHSAT105043	---	---	---	chr5	-	170246237	170246857	5q35.1
TC1200001819.oe.1	0.0158516	up	4.28377	9.79342	10.1705	9.70466	9.54262	10.5396	14.211	11.0216	12.9893	11.1936	10.8297	lnc-APOBEC1-2	NONCODE class 'Exonic', Ensembl Cross Reference: ENST00000534848 Name: CD163//LNCipedia Identified Transcript//NONCODE class 'Exonic', Ensembl Cross Reference: ENST00000542705 Name: CD163	---	---	---	lnc-APOBEC1-2:1	NonCoding	NONHSAT026255//NONHSAT026254	---	---	---	chr12	-	7470974	7473179	12p13.31
TSUnmapped00001336.oe.1	0.000793	up	4.28125	6.03218	4.42307	4.72363	4.84373	5.3434	8.29439	6.90907	7.04621	6.72457	6.88193	lnc-POTEM-2	LNCipedia Identified Transcript	---	---	---	lnc-POTEM-2:4	NonCoding	---	---	---	---	---	---	---	---	---
TC0700001325.oe.1	0.000533	up	4.27403	13.1646	11.117	12.4308	11.9243	12.7858	14.322	14.0687	14.774	14.2229	14.5129	lnc-AGBL3-2	LNCipedia Identified Transcript//NONCODE class 'Exonic'	---	---	---	lnc-AGBL3-2:1	NonCoding	NONHSAT123480	---	---	---	chr7	+	134970102	134970588	7q33
TC0700002781.oe.1	0.00247263	up	4.27331	6.08444	5.90112	6.36625	6.41557	6.42092	9.96604	8.19132	7.95193	7.07386	8.48193	lnc-PLXNA4-1	NONCODE class 'Exonic', Ensembl Cross Reference: ENST00000482581 Name: PODXL//LNCipedia Identified Transcript	---	---	---	lnc-PLXNA4-1:1	NonCoding	NONHSAT123415	---	---	---	chr7	-	131509069	131510898	7q32.3
TSUnmapped00001353.oe.1	0.00133834	up	4.25334	8.41537	7.02592	6.73426	6.61249	7.20683	10.1816	9.04509	9.59977	8.43058	9.18082	lnc-POTEM-2	LNCipedia Identified Transcript	---	---	---	lnc-POTEM-2:2	NonCoding	---	---	---	---	---	---	---	---	---
TC2100000821.oe.1	0.000129	up	4.25039	5.46345	4.90187	5.48875	4.423	4.76701	7.63142	6.50503	7.48892	7.2052	6.65149	lnc-DSCR4-9	LNCipedia Identified Transcript - Alternate transcript name(s): refGeneNc_68_NR_033800	---	---	---	lnc-DSCR4-9:1	NonCoding	---	---	---	---	chr21	-	38235809	38236836	21q22.13
TC0500002245.oe.1	0.00421722	up	4.22858	4.40518	4.23121	4.08479	4.00617	4.25973	7.91108	6.3372	5.9474	4.66589	6.52637	lnc-CTD-2117L12.1.1-3	NONCODE class 'Exonic', Ensembl Cross Reference: ENST00000511326 Name: PLK2//LNCipedia Identified Transcript	---	---	---	lnc-CTD-2117L12.1.1-3:1	NonCoding	NONHSAT101604	---	---	---	chr5	-	58454706	58455116	5q11.2
TC0300002753.oe.1	0.00453502	up	4.21803	10.388	7.67291	8.29306	8.35691	9.20002	9.99796	10.8459	11.5233	11.1325	10.7942	lnc-LRRC58-2	NONCODE class 'Exonic', Ensembl Cross Reference: ENST00000488318 Name: FSTL1//LNCipedia Identified Transcript	---	---	---	lnc-LRRC58-2:1	NonCoding	NONHSAT091445	---	---	---	chr3	-	120396891	120400089	3q13.33
TSUnmapped00001536.oe.1	0.00253512	up	4.20989	8.84469	7.0356	6.87033	7.24751	7.73553	10.7494	9.69397	9.38943	8.76853	9.50122	lnc-POTEG-4	LNCipedia Identified Transcript	---	---	---	lnc-POTEG-4:19	NonCoding	---	---	---	---	---	---	---	---	---
TC1800000528.oe.1	0.000258	up	4.20663	6.39035	5.8213	5.64493	5.27042	5.83021	7.85039	7.52614	8.93136	7.32247	7.69017	lnc-MALT1-10	NONCODE class 'Exonic', Ensembl Cross Reference: ENST00000590506 Name: NEDD4L//LNCipedia Identified Transcript	---	---	---	lnc-MALT1-10:1	NonCoding	NONHSAT059496	---	---	---	chr18	+	58390064	58398157	18q21.31
TC0200001727.oe.1	0.0106176	up	4.19874	4.71084	4.29428	5.67669	4.50273	4.58135	8.90662	6.33901	6.33978	5.48779	7.04246	lnc-G6PC2-1	NONCODE class 'Exonic', Ensembl Cross Reference: ENST00000472260 Name: NOSTRIN//LNCipedia Identified Transcript//NONCODE class 'Exonic', Ensembl Cross Reference: ENST00000495202 Name: NOSTRIN	---	---	---	lnc-G6PC2-1:1	NonCoding	NONHSAT075342//NONHSAT075341	---	---	---	chr2	+	168855686	168865054	2q24.3
TC1500000841.oe.1	0.0146468	up	4.16916	5.40576	4.60313	4.42331	4.21224	5.4145	6.23887	5.48968	8.85186	7.70186	6.07544	lnc-MESDC1-1	LNCipedia Identified Transcript//NONCODE class 'Exonic', Ensembl Cross Reference: ENST00000559966 Name: KIAA1199	---	---	---	lnc-MESDC1-1:1	NonCoding	NONHSAT047716	---	---	---	chr15	+	80946944	80949162	15q25.1
TC0500003063.oe.1	0.00580301	up	4.16686	4.91034	4.70463	5.22788	5.43708	4.90912	8.81492	6.69599	7.81466	5.90368	6.25461	lnc-TIGD6-4	LNCipedia Identified Transcript//NONCODE class 'Exonic', Ensembl Cross Reference: ENST00000509861 Name: CSF1R	---	---	---	lnc-TIGD6-4:4	NonCoding	NONHSAT104534	---	---	---	chr5	-	150053838	150054820	5q32
TC1000001596.oe.1	0.00258334	up	4.16518	5.40858	5.76429	6.15874	5.43096	5.95589	9.15982	7.39974	8.5573	6.72693	7.16658	lnc-BEND7-2	LNCipedia Identified Transcript//NONCODE class 'Exonic', Ensembl Cross Reference: ENST00000475325 Name: FRMD4A	---	---	---	lnc-BEND7-2:1	NonCoding	NONHSAT011517	---	---	---	chr10	-	13646272	13654526	10p13
TC0500000335.oe.1	0.00120412	up	4.16332	8.5988	6.5779	7.26124	7.57571	8.14737	9.1729	9.41581	10.4938	9.9029	9.46431	lnc-TTC23L-2	NONCODE class 'Exonic', Ensembl Cross Reference: ENST00000511652 Name: RAI14//NONCODE class 'Exonic', Ensembl Cross Reference: ENST00000505185 Name: RAI14//LNCipedia Identified Transcript//NONCODE class 'Exonic', Ensembl Cross Reference: ENST00000509247 Name: RAI14//NONCODE class 'Exonic', Ensembl Cross Reference: ENST00000510386 Name: RAI14	---	---	---	lnc-TTC23L-2:1	NonCoding	NONHSAT100992//NONHSAT100990//NONHSAT100989//NONHSAT100991	---	---	---	chr5	+	34684527	34811071	5p13.2
TSUnmapped00001538.oe.1	0.00358866	up	4.16139	8.1697	6.41079	6.33712	5.65159	7.0724	9.86589	8.5903	8.54242	8.3386	8.58972	lnc-POTEM-2	LNCipedia Identified Transcript	---	---	---	lnc-POTEM-2:22	NonCoding	---	---	---	---	---	---	---	---	---
TC0100001040.oe.1	0.000699	up	4.15162	6.0049	5.13099	5.45598	5.19626	5.51729	6.24841	7.42271	7.95218	7.61568	8.33482	lnc-ROR1-2	NONCODE class 'Exonic', PubMed Identifer: PMID:22140575 mixed_Pred2426//LNCipedia Identified Transcript	---	---	---	lnc-ROR1-2:1	NonCoding	NONHSAT003705	---	---	---	chr1	+	64179628	64181498	1p31.3
TC1800000525.oe.1	0.000116	up	4.1503	6.06201	5.50686	5.79194	5.64497	6.23114	8.03096	7.26162	8.81813	7.82469	7.56759	lnc-MALT1-13	LNCipedia Identified Transcript//NONCODE class 'Exonic', Ensembl Cross Reference: ENST00000589167 Name: NEDD4L	---	---	---	lnc-MALT1-13:1	NonCoding	NONHSAT059493	---	---	---	chr18	+	58330851	58336092	18q21.31
TC1600000622.oe.1	0.00996902	up	4.14802	4.5347	4.30132	4.65695	4.02037	4.0541	8.58484	5.75268	6.6206	5.26483	5.60659	lnc-ITGAD-2	LNCipedia Identified Transcript//NONCODE class 'Exonic', Ensembl Cross Reference: ENST00000562138 Name: ITGAX	---	---	---	lnc-ITGAD-2:1	NonCoding	NONHSAT141898	---	---	---	chr16	+	31371474	31372654	16p11.2
TC0200001717.oe.1	0.000228	up	4.13889	5.61009	5.78464	4.87128	5.22267	5.34738	7.42633	8.24467	7.2795	6.49501	7.63676	lnc-SCN2A-7	LNCipedia Identified Transcript//NONCODE class 'Exonic'	---	---	---	lnc-SCN2A-7:1	NonCoding	NONHSAT075254	---	---	---	chr2	+	165687311	165689406	2q24.3
TC1200000044.oe.1	0.000353	up	4.12834	6.03673	5.87712	6.52644	6.52754	6.09114	7.65552	7.74848	9.06477	9.00536	7.81264	lnc-FKBP4-3	LNCipedia Identified Transcript//NONCODE class 'Exonic', Ensembl Cross Reference: ENST00000496818 Name: CACNA1C	---	---	---	lnc-FKBP4-3:1	NonCoding	NONHSAT025462	---	---	---	chr12	+	2607880	2610699	12p13.33
TC1100001094.oe.1	0.002975	up	4.11108	5.28127	5.0852	5.25229	4.92453	5.37125	8.52496	6.84843	8.19186	6.29086	6.25602	lnc-NEU3-3	NONCODE class 'Exonic', Ensembl Cross Reference: ENST00000524599//LNCipedia Identified Transcript//NONCODE class 'Exonic', Ensembl Cross Reference: ENST00000528108 Name: SLCO2B1//NONCODE class 'Exonic', Ensembl Cross Reference: ENST00000530015 Name: SLCO2B1	---	---	---	lnc-NEU3-3:1	NonCoding	NONHSAT023079//NONHSAT023081//NONHSAT023080	---	---	---	chr11	+	75196275	75206400	11q13.4
TC1500001945.oe.1	4.8e-05	up	4.10379	8.81692	8.11093	9.04869	8.19963	8.69918	10.3855	10.2516	11.2792	10.4181	10.7257	lnc-PEAK1.1-1	NONCODE class 'Exonic', Ensembl Cross Reference: ENST00000569819 Name: PEAK1//NONCODE class 'Exonic', Ensembl Cross Reference: ENST00000569159 Name: PEAK1//NONCODE class 'Exonic', External ID: TCONS_00013240//NONCODE class 'Exonic', External ID: TCONS_00013241//NONCODE class 'Exonic', External ID: TCONS_00013237//gene_id XLOC_011535; transcript_id TCONS_00024175; oId TCONS_00016223; linc_name lin…	---	---	---	lnc-PEAK1.1-1:1	NonCoding	NONHSAT047439//NONHSAT047437//NONHSAT047427//NONHSAT047435//NONHSAT047440//NONHSAT047432//NONHSAT047431//NONHSAT047436//NONHSAT047438//NONHSAT047430	TCONS_00023744//TCONS_00024175//TCONS_00024176//TCONS_00024173//TCONS_00024174	---	---	chr15	-	77181979	77420214	15q24.3
TC1100001317.oe.1	0.0234737	up	4.09986	7.5395	5.92895	6.89743	5.84507	6.33934	11.1378	7.81174	8.27915	7.66732	7.83212	lnc-BIRC2-2	NONCODE class 'Exonic', Ensembl Cross Reference: ENST00000527336 Name: BIRC3//LNCipedia Identified Transcript	---	---	---	lnc-BIRC2-2:1	NonCoding	NONHSAT023878	---	---	---	chr11	+	102336521	102337291	11q22.2
TC0800000059.oe.1	0.00253074	up	4.0848	4.77527	5.16406	5.99062	5.53756	5.92319	8.96076	6.8901	6.63049	7.32054	7.74016	lnc-AC068020.1-2	LNCipedia Identified Transcript//NONCODE class 'Linc'	---	---	---	lnc-AC068020.1-2:1	NonCoding	NONHSAT124852	---	---	---	chr8	+	8138866	8140001	8p23.1
TC0700001324.oe.1	0.000677	up	4.08013	11.5688	9.60483	11.1452	10.2379	11.1673	12.4547	12.5506	13.1156	12.8502	12.8961	lnc-AGBL3-3	NONCODE class 'Exonic', Ensembl Cross Reference: ENST00000480638 Name: CALD1//LNCipedia Identified Transcript//NONCODE class 'Exonic', Ensembl Cross Reference: ENST00000473714 Name: CALD1	---	---	---	lnc-AGBL3-3:1	NonCoding	NONHSAT123478//NONHSAT123479	---	---	---	chr7	+	134960531	134968723	7q33
TC0100002250.oe.1	0.00129072	up	4.07544	3.95439	3.57287	3.55177	4.22103	4.45419	6.53545	4.83859	6.89393	6.24498	5.37606	lnc-RGS13-2	NONCODE class 'Exonic', Ensembl Cross Reference: ENST00000583155 Name: RGS1//LNCipedia Identified Transcript//NONCODE class 'Exonic', Ensembl Cross Reference: ENST00000474373 Name: RGS1//NONCODE class 'Exonic', Ensembl Cross Reference: ENST00000462589 Name: RGS1	---	---	---	lnc-RGS13-2:1	NonCoding	NONHSAT008534//NONHSAT008535//NONHSAT008536	---	---	---	chr1	+	192575763	192577276	1q31.2
TC1200001817.oe.1	0.00342963	up	4.06694	5.01787	4.50963	4.40839	4.34176	4.04788	8.15599	6.08843	6.83757	5.6312	5.73206	lnc-CD163-2	LNCipedia Identified Transcript//NONCODE class 'Exonic', Ensembl Cross Reference: ENST00000545597 Name: CD163L1	---	---	---	lnc-CD163-2:1	NonCoding	NONHSAT026251	---	---	---	chr12	-	7368837	7369493	12p13.31
TC1200002229.oe.1	0.0011955	up	4.06624	6.31662	6.67699	7.48586	7.32846	7.46945	10.2977	8.56343	8.87853	8.39475	9.26147	lnc-FAM186B-4	NONCODE class 'Antisense,Exonic', Ensembl Cross Reference: ENST00000550668 Name: FMNL3//LNCipedia Identified Transcript	---	---	---	lnc-FAM186B-4:1	NonCoding	NONHSAT028127	---	---	---	chr12	-	49637942	49639143	12q13.12
TC0400001690.oe.1	0.00653395	up	4.05287	3.16994	3.45959	4.28951	3.00648	3.64997	7.22383	4.90893	5.35351	4.23614	5.9478	lnc-QDPR-5	LNCipedia Identified Transcript//NONCODE class 'Sense No Exonic'	---	---	---	lnc-QDPR-5:1	NonCoding	NONHSAT095695	---	---	---	chr4	-	16874468	16877607	4p15.32
TC0100001146.oe.1	0.000528	up	4.03756	6.13608	5.24339	6.2254	5.178	5.84421	8.42953	7.04604	8.02699	7.06377	8.12817	lnc-DNAJB4-3	LNCipedia Identified Transcript//NONCODE class 'Exonic', Ensembl Cross Reference: ENST00000464998 Name: NEXN	---	---	---	lnc-DNAJB4-3:1	NonCoding	NONHSAT004052	---	---	---	chr1	+	77926569	77935970	1p31.1
TC0700000252.oe.1	0.0290742	up	4.03496	7.37954	7.66721	8.0302	8.37358	8.40245	7.07031	10.439	10.7835	10.784	10.839	lnc-CCDC126-4	LNCipedia Identified Transcript//NONCODE class 'Linc', Ensembl Cross Reference: ENST00000428259 Name: AC079780.3	---	---	---	lnc-CCDC126-4:1	NonCoding	NONHSAT119532	---	---	---	chr7	+	23480753	23480959	7p15.3
TC1100000225.oe.1	0.0092294	up	4.02806	9.37282	8.31582	8.19673	7.77643	9.12621	8.95537	10.8327	11.5196	11.6344	9.89635	lnc-MICALCL-3	LNCipedia Identified Transcript//NONCODE class 'Exonic', Ensembl Cross Reference: ENST00000529562 Name: MICAL2	---	---	---	lnc-MICALCL-3:1	NonCoding	NONHSAT018044	---	---	---	chr11	+	12225585	12227098	11p15.3
TC0100001410.oe.1	0.0143562	up	4.02619	7.33666	7.16096	7.17962	6.69206	7.18026	6.66149	9.81572	9.12551	9.89109	10.1028	lnc-STXBP3-3	LNCipedia Identified Transcript - Alternate transcript name(s): ucscGeneNc_uc001dwo_1	---	---	---	lnc-STXBP3-3:1	NonCoding	---	---	---	---	chr1	+	108901716	108902135	1p13.3
TC0400002571.oe.1	4.96e-05	up	4.0202	7.97672	8.19774	8.18439	7.74463	8.07998	9.3652	9.69388	10.2052	10.1773	10.7782	lnc-TMEM154-3	NONCODE class 'Exonic', Ensembl Cross Reference: ENST00000604822 Name: FBXW7//LNCipedia Identified Transcript	---	---	---	lnc-TMEM154-3:1	NonCoding	NONHSAT098802	---	---	---	chr4	-	152346812	152352696	4q31.3
TC0200004101.oe.1	0.00065	up	4.00419	5.71861	5.38638	5.63948	5.69325	5.96032	8.86545	6.90839	8.08289	7.0584	7.49046	lnc-GTDC1-10	LNCipedia Identified Transcript - Alternate transcript name(s): NONHSAT074758	---	---	---	lnc-GTDC1-10:1	NonCoding	---	---	---	---	chr2	-	144404883	144406655	2q22.3
TC1200001176.oe.1	0.00378843	up	3.99571	5.99716	5.34457	5.5783	5.33596	6.26643	9.00127	6.90674	8.53552	6.62806	7.44308	lnc-NR1H4-2	NONCODE class 'Exonic', Ensembl Cross Reference: ENST00000548113 Name: GAS2L3//NONCODE class 'Exonic', Ensembl Cross Reference: ENST00000548067 Name: GAS2L3//LNCipedia Identified Transcript	---	---	---	lnc-NR1H4-2:1	NonCoding	NONHSAT030262//NONHSAT030261	---	---	---	chr12	+	100601642	100618687	12q23.1
TC0800001585.oe.1	0.0188168	up	3.99132	8.01641	5.38091	6.01796	4.57392	6.11364	9.20393	7.613	8.56292	7.29973	7.40759	lnc-DUSP4-6	LNCipedia Identified Transcript//NONCODE class 'Exonic'	---	---	---	lnc-DUSP4-6:1	NonCoding	NONHSAT125813	---	---	---	chr8	-	29333063	29335165	8p12
TC0300003026.oe.1	0.00611096	up	3.99028	4.23853	4.6073	4.72697	4.70002	4.77403	7.72125	7.07773	6.34859	4.66733	7.2144	lnc-TM4SF1-3	LNCipedia Identified Transcript//NONCODE class 'Exonic', Ensembl Cross Reference: ENST00000468398 Name: TM4SF18	---	---	---	lnc-TM4SF1-3:1	NonCoding	NONHSAT092642	---	---	---	chr3	-	149329928	149333328	3q25.1
TC0800002329.oe.1	0.000512	up	3.98569	7.38266	5.72375	7.63305	6.96866	7.43436	9.20869	9.10495	9.16997	8.69251	8.94052	lnc-SAMD12-4	LNCipedia Identified Transcript//NONCODE class 'Sense No Exonic'	---	---	---	lnc-SAMD12-4:1	NonCoding	NONHSAT128404	---	---	---	chr8	-	118085495	118088259	8q24.11
TC0100003202.oe.1	4.97e-05	up	3.97453	10.7375	9.47569	9.61199	9.89747	10.2206	12.2988	11.7392	12.2019	11.8003	11.857	lnc-PADI2-1	LNCipedia Identified Transcript//NONCODE class 'Exonic', Ensembl Cross Reference: ENST00000474892 Name: RCC2	---	---	---	lnc-PADI2-1:1	NonCoding	NONHSAT001243	---	---	---	chr1	-	17407839	17409046	1p36.13
TC0100004648.oe.1	0.00477821	up	3.96432	11.5579	9.92494	9.83667	10.6173	11.4771	12.0376	12.712	13.9524	12.7174	11.9297	lnc-IGSF9-1	LNCipedia Identified Transcript//NONCODE class 'Exonic'	---	---	---	lnc-IGSF9-1:1	NonCoding	NONHSAT007029	---	---	---	chr1	-	159918397	159918653	1q23.2
TC0700002006.oe.1	0.0497471	up	3.95918	5.81387	4.92929	5.56576	5.19008	5.4818	10.6061	6.36146	7.53984	6.03766	6.3617	lnc-ELMO1-1	LNCipedia Identified Transcript//NONCODE class 'Exonic', Ensembl Cross Reference: ENST00000543742 Name: AOAH	---	---	---	lnc-ELMO1-1:1	NonCoding	NONHSAT120133	---	---	---	chr7	-	36623190	36661300	7p14.2
TC1300001389.oe.1	0.000628	up	3.94413	7.00902	7.65847	7.50386	7.62923	7.94557	9.85042	9.01243	10.2229	8.49856	10.0604	lnc-DIS3-4	LNCipedia Identified Transcript//NONCODE class 'Linc'	---	---	---	lnc-DIS3-4:1	NonCoding	NONHSAT034295	---	---	---	chr13	-	73093626	73100948	13q22.1
TC1300000957.oe.1	6.61e-05	up	3.92785	8.42138	7.27604	7.46509	7.61736	7.95477	9.12855	9.7923	10.0259	10.0265	9.63009	lnc-AL136219.1-4	LNCipedia Identified Transcript//NONCODE class 'Exonic'	---	---	---	lnc-AL136219.1-4:7	NonCoding	NONHSAT032378	---	---	---	chr13	-	21372577	21374512	13q12.11
TC1700001197.oe.1	0.000698	up	3.92695	6.22755	4.72935	5.45457	5.43556	5.978	7.65804	6.65691	8.30976	7.61412	7.45324	lnc-ACE-4	LNCipedia Identified Transcript//NONCODE class 'Sense No Exonic', Ensembl Cross Reference: ENST00000581424 Name: TANC2	---	---	---	lnc-ACE-4:1	NonCoding	NONHSAT055190	---	---	---	chr17	+	63148228	63155226	17q23.3
TC1500001507.oe.1	0.000908	up	3.91483	9.86854	8.82107	9.34943	8.77111	9.67455	10.8663	10.6406	12.0337	12.031	10.7578	lnc-MYEF2-7	NONCODE class 'Exonic', Ensembl Cross Reference: ENST00000560820 Name: FBN1//LNCipedia Identified Transcript	---	---	---	lnc-MYEF2-7:1	NonCoding	NONHSAT042346	---	---	---	chr15	-	48437622	48445412	15q21.1
TC1900000438.oe.1	0.00207433	up	3.91265	8.22229	6.64357	7.05064	6.56745	7.78577	8.74826	8.79362	10.3693	9.02297	9.17627	lnc-RAB8A-1	NONCODE class 'Exonic', Ensembl Cross Reference: ENST00000586193 Name: TPM4//NONCODE class 'Exonic', Ensembl Cross Reference: ENST00000590180 Name: TPM4//NONCODE class 'Exonic', Ensembl Cross Reference: ENST00000591645 Name: TPM4//NONCODE class 'Exonic', Ensembl Cross Reference: ENST00000591226 Name: TPM4//NONCODE class 'Exonic', PubMed Identifer: PMID:22140575 mixed_Pred25835//LNCipedia Identifi…	---	---	---	lnc-RAB8A-1:1	NonCoding	NONHSAT062766//NONHSAT062767//NONHSAT062768//NONHSAT062764//NONHSAT062765	---	---	---	chr19	+	16080056	16102338	19p13.12
TC1100001197.oe.1	0.00346283	up	3.9102	8.05557	7.46884	8.11688	7.30426	7.9579	8.20884	9.83069	10.7803	9.43993	10.48	lnc-TMEM135-6	NONCODE class 'Antisense', Ensembl Cross Reference: ENST00000528769 Name: PRSS23//LNCipedia Identified Transcript//NONCODE class 'Antisense', Ensembl Cross Reference: ENST00000531521 Name: PRSS23	---	---	---	lnc-TMEM135-6:1	NonCoding	NONHSAT023505//NONHSAT023504	---	---	---	chr11	+	86940786	86951736	11q14.2
TC1800000336.oe.1	0.00312864	up	3.90424	4.48226	4.71312	4.77185	4.44473	4.22609	7.61945	5.24378	7.44276	5.78226	6.375	lnc-MAPRE2-2	NONCODE class 'Exonic', Ensembl Cross Reference: ENST00000592449 Name: DTNA//LNCipedia Identified Transcript	---	---	---	lnc-MAPRE2-2:1	NonCoding	NONHSAT058894	---	---	---	chr18	+	34882089	34891140	18q12.1
TC0300000114.oe.1	0.014052	up	3.90289	4.62916	4.15957	4.41856	4.3428	4.86643	8.81232	5.62033	6.52017	5.55619	5.73022	lnc-TSEN2-4	LNCipedia Identified Transcript//NONCODE class 'Sense No Exonic'	---	---	---	lnc-TSEN2-4:1	NonCoding	NONHSAT088008	---	---	---	chr3	+	12408874	12410425	3p25.2
TC1200000326.oe.1	0.000305	up	3.90281	4.53456	4.01754	4.39455	3.91481	4.19036	5.28226	5.62403	6.80603	6.49484	6.66724	lnc-SLCO1C1-3	NONCODE class 'Exonic', Ensembl Cross Reference: ENST00000542675 Name: PDE3A//LNCipedia Identified Transcript	---	---	---	lnc-SLCO1C1-3:1	NonCoding	NONHSAT027229	---	---	---	chr12	+	20370125	20557224	12p12.2
TC0500002439.oe.1	9.02e-05	up	3.88132	9.45395	8.13067	8.68207	8.71967	9.16095	11.1827	10.6252	11.0964	10.6018	10.424	lnc-LHFPL2-1	NONCODE class 'Exonic', Ensembl Cross Reference: ENST00000521011 Name: ARSB//LNCipedia Identified Transcript	---	---	---	lnc-LHFPL2-1:1	NonCoding	NONHSAT102338	---	---	---	chr5	-	78780352	78783494	5q14.1
TC0X00001879.oe.1	0.0355647	up	3.87906	5.44811	6.33987	7.88238	6.81627	7.38454	11.1883	7.99683	8.34761	7.4159	8.70112	lnc-MAGEA10-2	NONCODE class 'Exonic', Ensembl Cross Reference: ENST00000491339 Name: GABRE//LNCipedia Identified Transcript	---	---	---	lnc-MAGEA10-2:1	NonCoding	NONHSAT139027	---	---	---	chrX	-	151969852	151972660	Xq28
TC1500000840.oe.1	0.0382111	up	3.87023	9.89853	6.98968	7.2686	7.02477	8.76063	9.5651	8.7178	11.6379	10.6669	9.11664	lnc-FAM108C1-1	LNCipedia Identified Transcript - Alternate transcript name(s): l_1198_chr15:81114243-81115969_testes	---	---	---	lnc-FAM108C1-1:1	NonCoding	---	---	---	---	chr15	+	80821903	80823665	15q25.1
TC0100003080.oe.1	0.00680781	up	3.86945	6.96025	5.59065	5.34805	5.48185	6.23002	7.78578	7.07313	9.5759	7.73639	7.20026	lnc-SLC2A7-2	LNCipedia Identified Transcript//NONCODE class 'Exonic'	---	---	---	lnc-SLC2A7-2:1	NonCoding	NONHSAT000778	---	---	---	chr1	-	9041842	9057545	1p36.23
TC0700000837.oe.1	0.0165508	up	3.86861	4.6673	4.26461	4.69187	4.00695	4.49178	8.47916	6.40046	5.32676	4.85967	6.81554	lnc-GNAI1-5	LNCipedia Identified Transcript//NONCODE class 'Exonic', Ensembl Cross Reference: ENST00000526804 Name: CD36//NONCODE class 'Exonic', Ensembl Cross Reference: ENST00000441109 Name: CD36//NONCODE class 'Exonic', Ensembl Cross Reference: ENST00000480599 Name: CD36	---	---	---	lnc-GNAI1-5:1	NonCoding	NONHSAT121745//NONHSAT121748//NONHSAT121746	---	---	---	chr7	+	80602150	80656683	7q21.11
TC0100000247.oe.1	0.00100582	up	3.86272	5.68214	5.55433	5.9285	5.89	5.66665	7.63881	6.50892	8.91193	7.65742	7.75263	lnc-C1orf196-2	NONCODE class 'Linc', PubMed Identifer: PMID:23818866 FPKM1_group_146_transcrip//LNCipedia Identified Transcript - Alternate transcript name(s): FPKM1_group_146_transcript_1	---	---	---	lnc-C1orf196-2:1	NonCoding	NONHSAT000991	---	---	---	chr1	+	14195193	14198320	1p36.21
TC1200001006.oe.1	2.09e-05	up	3.86189	4.0572	3.72346	4.29399	3.68317	3.97885	6.23323	5.35064	6.33053	5.57119	5.99762	lnc-SYT1-9	NONCODE class 'Exonic', Ensembl Cross Reference: ENST00000547725 Name: NAV3//LNCipedia Identified Transcript	---	---	---	lnc-SYT1-9:1	NonCoding	NONHSAT029621	---	---	---	chr12	+	77966276	78006594	12q21.2
TC0500002628.oe.1	0.000298	up	3.84367	3.94999	4.10098	4.50703	3.93649	4.50135	6.65568	6.12778	6.68503	5.06548	6.17429	lnc-SLCO4C1-4	NONCODE class 'Exonic', Ensembl Cross Reference: ENST00000507360 Name: ST8SIA4//LNCipedia Identified Transcript	---	---	---	lnc-SLCO4C1-4:1	NonCoding	NONHSAT103013	---	---	---	chr5	-	100886352	100890882	5q21.1
TC0700001287.oe.1	0.00145087	up	3.83835	4.98097	5.66177	5.51367	5.87367	5.44864	8.21838	6.48452	7.56859	6.62767	8.28201	lnc-CPA1-3	NONCODE class 'Exonic', Ensembl Cross Reference: ENST00000494868 Name: MEST//NONCODE class 'Exonic', Ensembl Cross Reference: ENST00000488093 Name: MEST//LNCipedia Identified Transcript	---	---	---	lnc-CPA1-3:1	NonCoding	NONHSAT123353//NONHSAT123354	---	---	---	chr7	+	130498225	130501069	7q32.2
TC0200002090.oe.1	0.0185253	up	3.82883	9.65693	6.47775	7.58237	7.27427	8.46711	10.4129	9.11721	10.7422	10.0385	8.83211	lnc-PARD3B-3	NONCODE class 'Exonic', Ensembl Cross Reference: ENST00000472299 Name: NRP2//LNCipedia Identified Transcript//NONCODE class 'Exonic', Ensembl Cross Reference: ENST00000468256 Name: NRP2	---	---	---	lnc-PARD3B-3:1	NonCoding	NONHSAT076520//NONHSAT076524	---	---	---	chr2	+	205752468	205767064	2q33.3
TC0500002830.oe.1	0.018635	up	3.8266	10.6868	7.67207	7.76444	8.41895	8.64564	9.15745	10.8517	11.2879	10.6575	10.9137	lnc-ACSL6-1	prolyl 4-hydroxylase, alpha polypeptide II [Source:HGNC Symbol;Acc:HGNC:8547]//NONCODE class 'Exonic', Ensembl Cross Reference: ENST00000474628 Name: P4HA2//NONCODE class 'Exonic', External ID: TCONS_00032207 Name: P4HA2, Ensembl Cross Reference: ENST00000506807 Name: P4HA2//NONCODE class 'Exonic', Ensembl Cross Reference: ENST00000467587 Name: P4HA2//LNCipedia Identified Transcript - Alternate t…	ENST00000506807	---	---	lnc-ACSL6-1:1	NonCoding	NONHSAT103727//NONHSAT103725//NONHSAT103726	---	---	---	chr5	-	132192671	132195730	5q31.1
TSUnmapped00001547.oe.1	0.0277362	up	3.82135	7.18864	6.84609	8.33184	8.14982	8.85268	12.0597	9.40566	9.91368	8.35231	9.3081	lnc-IFI27L1-1	LNCipedia Identified Transcript	---	---	---	lnc-IFI27L1-1:7	NonCoding	---	---	---	---	---	---	---	---	---
TC0500000701.oe.1	0.0202117	up	3.81428	5.39446	4.29117	5.71949	5.04687	4.84715	9.04302	6.32318	7.31037	5.26116	7.01849	lnc-F2R-3	NONCODE class 'Exonic', Ensembl Cross Reference: ENST00000509741 Name: IQGAP2//LNCipedia Identified Transcript	---	---	---	lnc-F2R-3:1	NonCoding	NONHSAT102243	---	---	---	chr5	+	76674641	76677542	5q13.3
TC0700002867.oe.1	0.00957301	up	3.80743	3.91658	4.05239	3.96898	4.3414	4.54557	6.41303	5.44334	8.11785	4.97259	5.52219	lnc-TAS2R38-1	LNCipedia Identified Transcript//NONCODE class 'Exonic', Ensembl Cross Reference: ENST00000470595 Name: CLEC5A//NONCODE class 'Exonic', Ensembl Cross Reference: ENST00000481301 Name: CLEC5A	---	---	---	lnc-TAS2R38-1:1	NonCoding	NONHSAT123760//NONHSAT123761	---	---	---	chr7	-	141931508	141946887	7q34
TC0400001688.oe.1	0.00109464	up	3.79055	5.80184	5.54282	6.72603	6.03946	6.49823	8.98178	7.94399	7.83533	7.05441	8.40492	lnc-TAPT1-6	LNCipedia Identified Transcript//NONCODE class 'Exonic', Ensembl Cross Reference: ENST00000504189 Name: LDB2	---	---	---	lnc-TAPT1-6:1	NonCoding	NONHSAT095694	---	---	---	chr4	-	16750850	16898378	4p15.32
TC0200004091.oe.1	0.0102238	up	3.7866	10.0913	7.3672	8.64125	7.33509	8.33876	10.877	10.1442	10.8844	9.44529	10.0272	lnc-ZEB2-15	LNCipedia Identified Transcript - Alternate transcript name(s): uc_76_-	---	---	---	lnc-ZEB2-15:1	NonCoding	---	---	---	---	chr2	-	144120036	144120370	2q22.3
TC0600002924.oe.1	0.00109176	up	3.77708	6.20656	7.30316	7.20441	7.65472	8.04786	9.51694	9.23553	9.53049	8.29232	9.42779	lnc-TUBE1-6//NONHSAG044626//RP1-142L7.9	LNCipedia Identified Transcript//N/A//NONCODE class 'Sense No Exonic', Ensembl Cross Reference: ENST00000603682 Name: RP1-142L7.9	ENST00000603682.1//ENST00000603682	---	---	lnc-TUBE1-6:1	NonCoding	NONHSAT114508	---	---	---	chr6	-	112217640	112219570	6q21
TC0200003818.oe.1	0.000342	up	3.77497	7.1539	5.96941	6.29078	6.34229	6.49017	8.42659	8.01839	9.23797	7.7175	8.42843	OTTHUMG00000150313//NONHSAG056025//RP11-181E10.3//NONHSAG056026//MIR4435-1HG//lnc-AC108463.1-3	LNCipedia Identified Transcript - Alternate transcript name(s): AC068491.1-011//NONCODE Identified Transcript, External ID: TCONS_00023171//LNCipedia Identified Transcript - Alternate transcript name(s): AC068491.1-010//NONCODE Identified Transcript, Ensembl Cross Reference: ENST00000603827 Name: MIR4435-1HG//NONCODE Identified Transcript, External ID: TCONS_00023170 Name: MIR4435-1HG, Ensembl Cr…	ENST00000432818.4//ENST00000603748.1//ENST00000431385.4//ENST00000609902//ENST00000604981//ENST00000371162//ENST00000443467.4//ENST00000441075//ENST00000443467//ENST00000441075.1//ENST00000603748//ENST00000605570//ENST00000603827//ENST00000308604.5//ENST00000371162.4//ENST00000432818//ENST00000442293.4//ENST00000439494//ENST00000444301.4//ENST00000603827.1//ENST00000604981.4//ENST00000609220//ENS…	---	OTTHUMT00000332137.1//OTTHUMT00000332130.1//OTTHUMT00000332133.1//OTTHUMT00000332138.1//OTTHUMT00000332129.1//OTTHUMT00000332135.1//OTTHUMT00000332136.1//OTTHUMT00000317535.1//OTTHUMT00000317532.1//OTTHUMT00000332128.1//OTTHUMT00000332139.1//OTTHUMT00000332134.1//OTTHUMT00000332132.1	lnc-AC108463.1-3:26//lnc-AC108463.1-3:20//lnc-AC108463.1-3:11//lnc-AC108463.1-3:3//lnc-AC108463.1-3:21//lnc-AC108463.1-3:14//lnc-AC108463.1-3:16//lnc-AC108463.1-3:12//lnc-AC108463.1-3:2//lnc-AC108463.1-3:27//lnc-AC108463.1-3:6//lnc-AC108463.1-3:15//lnc-AC108463.1-3:25//lnc-AC108463.1-3:8//lnc-AC108463.1-3:23//lnc-AC108463.1-3:22//lnc-AC108463.1-3:10//lnc-AC108463.1-3:7//lnc-AC108463.1-3:1//lnc-AC…	NonCoding	NONHSAT073644//NONHSAT073638//NONHSAT073650//NONHSAT073624//NONHSAT073630//NONHSAT073636//NONHSAT073646//NONHSAT073652//NONHSAT073629//NONHSAT073622//NONHSAT073633//NONHSAT073643//NONHSAT073648//NONHSAT073651//NONHSAT073627//NONHSAT073626//NONHSAT073649//NONHSAT073639//NONHSAT073645//NONHSAT073640//NONHSAT073620//NONHSAT073628//NONHSAT073642	---	---	NR_024373//NR_015395	chr2	-	111145784	111495115	2q13
TC0900000427.oe.1	0.00694884	up	3.77142	8.49142	6.08596	7.3869	6.8222	8.28702	9.75536	8.74255	10.0387	8.59052	9.52194	lnc-CNTNAP3B-7	LNCipedia Identified Transcript//NONCODE class 'Linc', Ensembl Cross Reference: ENST00000509595 Name: BX005214.1//NONCODE class 'Linc', Ensembl Cross Reference: ENST00000441829 Name: BX005214.1	---	---	---	lnc-CNTNAP3B-7:1	NonCoding	NONHSAT131379//NONHSAT131380	---	---	---	chr9	+	42625429	42627004	9p11.1
TC1100001195.oe.1	0.000582	up	3.76499	5.60579	5.81196	5.71187	5.66342	6.37216	6.58277	7.80056	8.42546	7.70042	8.21921	lnc-TMEM135-8	LNCipedia Identified Transcript//NONCODE class 'Exonic', Ensembl Cross Reference: ENST00000533880 Name: PRSS23//NONCODE class 'Exonic', Ensembl Cross Reference: ENST00000531475 Name: PRSS23//NONCODE class 'Exonic'	---	---	---	lnc-TMEM135-8:1	NonCoding	NONHSAT023495//NONHSAT023499//NONHSAT023498//NONHSAT023496	---	---	---	chr11	+	86800544	86937818	11q14.2
TC0100004305.oe.1	0.000277	up	3.75735	10.958	10.2032	10.6823	10.2062	11.179	12.8966	12.8533	13.0802	11.92	12.0272	lnc-IGSF3-2	LNCipedia Identified Transcript//NONCODE class 'Exonic'	---	---	---	lnc-IGSF3-2:2	NonCoding	NONHSAT005450	---	---	---	chr1	-	116521882	116544566	1p13.1
TC0500002454.oe.1	0.00195175	up	3.75627	7.68911	9.39051	9.4998	8.80833	9.49355	10.1866	10.5166	11.3121	10.9242	11.4884	lnc-MTX3-4	LNCipedia Identified Transcript//NONCODE class 'Exonic'	---	---	---	lnc-MTX3-4:1	NonCoding	NONHSAT102391	---	---	---	chr5	-	80138880	80140167	5q14.1
TC0700001092.oe.1	0.0329351	up	3.75181	3.86404	3.94404	3.95919	3.6671	3.86403	8.35692	5.01095	6.45586	4.50443	4.50817	lnc-PRKAR2B-3	LNCipedia Identified Transcript//NONCODE class 'Exonic', Ensembl Cross Reference: ENST00000466738 Name: PIK3CG	---	---	---	lnc-PRKAR2B-3:1	NonCoding	NONHSAT122667	---	---	---	chr7	+	106882164	106882936	7q22.3
TC0100004551.oe.1	0.0338778	up	3.743	11.2964	7.48403	8.48821	8.88764	9.52815	9.59338	11.2061	11.3721	11.9566	11.0771	lnc-THBS3-2	LNCipedia Identified Transcript//NONCODE class 'Exonic', Ensembl Cross Reference: ENST00000498500 Name: THBS3	---	---	---	lnc-THBS3-2:3	NonCoding	NONHSAT006702	---	---	---	chr1	-	155195588	155196442	1q22
TC0500000599.oe.1	0.00041	up	3.73261	6.88004	6.28374	6.09959	6.24509	6.80176	7.97799	8.53492	8.97828	7.44734	8.87261	lnc-CENPH-1	LNCipedia Identified Transcript//NONCODE class 'Exonic', Ensembl Cross Reference: ENST00000513102 Name: CCNB1	---	---	---	lnc-CENPH-1:1	NonCoding	NONHSAT101893	---	---	---	chr5	+	69177061	69177697	5q13.2
TC0X00001078.oe.1	0.00192119	up	3.73161	8.44974	7.22389	8.00779	8.23706	8.56727	10.0596	8.96656	10.0955	9.75067	11.1124	lnc-VCX3A-5	LNCipedia Identified Transcript//NONCODE class 'Exonic'	---	---	---	lnc-VCX3A-5:1	NonCoding	NONHSAT136161	---	---	---	chrX	-	5890060	5891417	Xp22.32
TC0X00001358.oe.1	0.0109788	up	3.72554	10.1113	7.84663	7.60102	8.10102	8.3028	8.86973	10.3377	10.8351	10.6293	10.7782	lnc-RP11-363G10.2.1-1	LNCipedia Identified Transcript//NONCODE class 'Exonic', Ensembl Cross Reference: ENST00000471617 Name: MAGED4B	---	---	---	lnc-RP11-363G10.2.1-1:1	NonCoding	NONHSAT137067	---	---	---	chrX	-	52061839	52064077	Xp11.22
TC0600002068.oe.1	0.00156463	up	3.72536	6.7588	5.97104	6.18793	5.15133	6.52585	9.00873	7.7506	7.6944	7.31574	8.31239	lnc-ERVFRD-1-1	LNCipedia Identified Transcript//NONCODE class 'Sense No Exonic'	---	---	---	lnc-ERVFRD-1-1:1	NonCoding	NONHSAT107742	---	---	---	chr6	-	11208518	11209015	6p24.2
TC0400000305.oe.1	0.0241343	up	3.72523	4.31108	3.8855	4.19798	3.81613	3.80461	8.225	5.42981	5.07471	4.31449	6.45794	lnc-STIM2-9	NONCODE class 'Exonic', Ensembl Cross Reference: ENST00000507864 Name: PCDH7//LNCipedia Identified Transcript	---	---	---	lnc-STIM2-9:1	NonCoding	NONHSAT095933	---	---	---	chr4	+	30723050	30724596	4p15.1
TC0600002544.oe.1	0.0257825	up	3.71083	4.24831	4.44796	5.23468	4.42999	4.68014	8.61989	6.27831	5.94121	4.55443	7.10595	lnc-GPR110-1	LNCipedia Identified Transcript//NONCODE class 'Exonic', Ensembl Cross Reference: ENST00000478711 Name: GPR116	---	---	---	lnc-GPR110-1:1	NonCoding	NONHSAT113023	---	---	---	chr6	-	46886599	46888416	6p12.3
TC0800000672.oe.1	0.00180893	up	3.7101	6.70771	6.3588	6.36689	6.5393	5.80741	6.85736	8.95593	7.98151	8.68291	8.75971	lnc-C8orf34-6	NONCODE class 'Sense No Exonic', Ensembl Cross Reference: ENST00000528146 Name: SULF1//LNCipedia Identified Transcript//NONCODE class 'Sense No Exonic', Ensembl Cross Reference: ENST00000534088 Name: SULF1	---	---	---	lnc-C8orf34-6:1	NonCoding	NONHSAT127128//NONHSAT127129	---	---	---	chr8	+	69592884	69597592	8q13.2
TC0700002439.oe.1	0.00476613	up	3.70231	7.99426	5.67058	6.15345	6.07283	6.29117	7.76886	7.67714	8.95693	8.95198	8.2695	lnc-FAM133B-4	NONCODE class 'Exonic', Ensembl Cross Reference: ENST00000473078 Name: CDK6//LNCipedia Identified Transcript	---	---	---	lnc-FAM133B-4:1	NonCoding	NONHSAT121991	---	---	---	chr7	-	92671235	92725710	7q21.2
TC0900001136.oe.1	0.0112692	up	3.66766	8.96863	7.37729	7.21574	7.15788	8.311	8.11084	9.89087	10.3297	10.6738	9.39965	lnc-SWI5-3	NONCODE class 'Exonic', Ensembl Cross Reference: ENST00000463998 Name: DNM1//LNCipedia Identified Transcript	---	---	---	lnc-SWI5-3:1	NonCoding	NONHSAT134920	---	---	---	chr9	+	128233564	128239783	9q34.11
TC0100001924.oe.1	0.0281547	up	3.65619	4.73091	4.34627	4.72914	4.81228	4.64278	8.71641	5.69761	7.60011	5.32545	5.27348	lnc-FCRLA-1	LNCipedia Identified Transcript//NONCODE class 'Exonic', Ensembl Cross Reference: ENST00000485778 Name: FCGR2B	---	---	---	lnc-FCRLA-1:1	NonCoding	NONHSAT007197	---	---	---	chr1	+	161663199	161674116	1q23.3
TC0700002437.oe.1	0.0100281	up	3.65556	8.43776	5.41447	6.12656	6.01647	6.90925	7.8125	8.19129	8.61883	8.75188	8.88046	lnc-FAM133B-2	LNCipedia Identified Transcript//NONCODE class 'Exonic'	---	---	---	lnc-FAM133B-2:1	NonCoding	NONHSAT121988	---	---	---	chr7	-	92611468	92613924	7q21.2
TC1100001907.oe.1	0.0434144	up	3.62821	9.75354	8.03958	7.69776	7.70384	8.83135	7.6614	10.6847	11.339	11.1277	10.5096	lnc-DKK3-4	LNCipedia Identified Transcript//NONCODE class 'Exonic', Ensembl Cross Reference: ENST00000527132 Name: DKK3	---	---	---	lnc-DKK3-4:1	NonCoding	NONHSAT018032	---	---	---	chr11	-	11963106	12008630	11p15.3
TC0100000915.oe.1	0.00139834	up	3.62664	4.68149	4.86008	4.89273	4.75318	5.5908	6.93647	5.98328	8.09085	6.54437	6.51648	lnc-SCP2-4	LNCipedia Identified Transcript//NONCODE class 'Exonic', Ensembl Cross Reference: ENST00000471285 Name: PODN	---	---	---	lnc-SCP2-4:1	NonCoding	NONHSAT003287	---	---	---	chr1	+	53078611	53082094	1p32.3
TC1700002004.oe.1	0.0032616	up	3.60981	7.59047	6.15345	7.01151	6.78226	8.15687	9.89852	8.46847	9.43119	8.67618	8.47981	lnc-B9D1-3	LNCipedia Identified Transcript//NONCODE class 'Antisense,Exonic', Ensembl Cross Reference: ENST00000574313 Name: MFAP4	---	---	---	lnc-B9D1-3:1	NonCoding	NONHSAT146474	---	---	---	chr17	-	19383446	19384229	17p11.2
TC0500002355.oe.1	0.0305665	up	3.6085	4.31582	4.64252	4.63248	3.82775	4.45869	8.70827	6.32486	5.42599	4.58409	6.09105	NONHSAG040671//lnc-ZNF366-1//RP11-389C8.2//OTTHUMG00000173465	LNCipedia Identified Transcript - Alternate transcript name(s): RP11-389C8.2-001//NONCODE class 'Linc', External ID: TCONS_00032160 Name: RP11-389C8.2, Ensembl Cross Reference: ENST00000564956 Name: RP11-389C8.2//LNCipedia Identified Transcript//N/A	ENST00000564956.1//ENST00000564956	---	OTTHUMT00000423207.1	lnc-ZNF366-1:1//lnc-ZNF366-1:2	NonCoding	NONHSAT102058	---	---	---	chr5	-	72439899	72442387	5q13.2
TC0100004134.oe.1	0.000803	up	3.60238	5.28438	4.77757	5.32753	5.85991	5.02095	7.54648	7.13306	7.90727	6.15263	6.77566	lnc-SASS6-5	LNCipedia Identified Transcript//NONCODE class 'Exonic', Ensembl Cross Reference: ENST00000492943 Name: FRRS1//NONCODE class 'Exonic', Ensembl Cross Reference: ENST00000489209 Name: FRRS1	---	---	---	lnc-SASS6-5:1	NonCoding	NONHSAT004758//NONHSAT004757	---	---	---	chr1	-	99710825	99715659	1p21.2
TC0200004135.oe.1	0.0221104	up	3.5999	8.36721	5.40144	6.50192	5.86092	7.08119	8.34754	7.2494	9.62854	8.99868	8.22831	lnc-AC023469.1.1-2	LNCipedia Identified Transcript//NONCODE class 'Exonic', Ensembl Cross Reference: ENST00000473639 Name: RND3	---	---	---	lnc-AC023469.1.1-2:1	NonCoding	NONHSAT074931	---	---	---	chr2	-	150470141	150471960	2q23.3
TC1100000251.oe.1	0.000952	up	3.5995	6.15397	6.898	7.79648	6.85761	6.92779	8.74056	8.32646	9.19134	9.48115	8.13333	lnc-FAR1-7	LNCipedia Identified Transcript - Alternate transcript name(s): ENST00000526298//LNCipedia Identified Transcript - Alternate transcript name(s): ENST00000533633//LNCipedia Identified Transcript - Alternate transcript name(s): ENST00000310358	---	---	---	lnc-FAR1-7:1	NonCoding	---	---	---	---	chr11	+	13962367	14268100	11p15.2
TC1700001452.oe.1	0.000224	up	3.59688	4.35978	4.36001	4.28279	4.28237	4.64137	7.23471	5.74034	6.05903	5.69017	6.43579	NONHSAG022913//lnc-C1QTNF1-2	LNCipedia Identified Transcript//NONCODE class 'Exonic', Ensembl Cross Reference: ENST00000582295 Name: C1QTNF1	---	---	---	lnc-C1QTNF1-2:1	NonCoding	NONHSAT056289	---	---	---	chr17	+	79024169	79025052	17q25.3
TC0700002598.oe.1	0.0173187	up	3.5953	9.46565	8.33747	7.70786	7.64733	8.60908	12.2696	9.51115	9.68185	9.80811	9.7272	lnc-NAMPT-2	LNCipedia Identified Transcript//NONCODE class 'Exonic'	---	---	---	lnc-NAMPT-2:1	NonCoding	NONHSAT122658	---	---	---	chr7	-	106656768	106658957	7q22.3
TC0300001547.oe.1	0.000687	up	3.59209	5.50863	5.28343	4.95492	4.55781	5.26124	6.86065	6.07801	7.48255	6.60268	7.76626	lnc-FNDC3B-11	NONCODE class 'Exonic', Ensembl Cross Reference: ENST00000460860 Name: ECT2//LNCipedia Identified Transcript	---	---	---	lnc-FNDC3B-11:1	NonCoding	NONHSAT093263	---	---	---	chr3	+	172802861	172806107	3q26.31
TSUnmapped00000506.oe.1	0.0004	up	3.58725	6.89684	5.68599	5.65599	6.33469	5.72793	8.42038	7.58749	7.96871	7.31392	8.22533	LINC01296	LNCipedia Identified Transcript	---	---	---	LINC01296:7	NonCoding	---	---	---	---	---	---	---	---	---
TC1600000784.oe.1	0.00206775	up	3.57549	7.92864	6.83346	7.62674	6.3703	7.61115	10.0515	8.61151	9.54258	8.69064	8.66477	lnc-TMEM188-4	LNCipedia Identified Transcript//NONCODE class 'Exonic', Ensembl Cross Reference: ENST00000561525 Name: HEATR3	---	---	---	lnc-TMEM188-4:1	NonCoding	NONHSAT142397	---	---	---	chr16	+	50078944	50084620	16q12.1
TC1200000260.oe.1	0.00155207	up	3.56336	11.2864	9.36265	9.73082	9.77449	9.84267	11.8602	11.0884	11.966	11.9031	12.3456	lnc-KIAA1467-3	NONCODE class 'Exonic', Ensembl Cross Reference: ENST00000535134 Name: EMP1//NONCODE class 'Exonic', Ensembl Cross Reference: ENST00000541935 Name: EMP1//LNCipedia Identified Transcript//NONCODE class 'Exonic', Ensembl Cross Reference: ENST00000542289 Name: EMP1	---	---	---	lnc-KIAA1467-3:1	NonCoding	NONHSAT027039//NONHSAT027038//NONHSAT027037	---	---	---	chr12	+	13196726	13215395	12p13.1
TC1100000226.oe.1	0.018264	up	3.55764	7.98356	6.41333	6.66905	7.0283	7.25834	6.95892	9.16227	9.75845	10.1183	8.50928	lnc-MICALCL-2	LNCipedia Identified Transcript//NONCODE class 'Exonic', Ensembl Cross Reference: ENST00000526672 Name: MICAL2//NONCODE class 'Exonic', Ensembl Cross Reference: ENST00000530021 Name: MICAL2//NONCODE class 'Exonic', Ensembl Cross Reference: ENST00000525444 Name: MICAL2	---	---	---	lnc-MICALCL-2:1	NonCoding	NONHSAT018046//NONHSAT018045//NONHSAT018047	---	---	---	chr11	+	12249941	12263782	11p15.3
TC1700000293.oe.1	8.73e-05	up	3.5562	4.24017	4.20053	4.0642	4.02091	4.08514	5.74644	5.99007	6.79876	5.96502	5.26236	AC093484.4//OTTHUMG00000058991//lnc-UBB-2//NONHSAG020955	LNCipedia Identified Transcript - Alternate transcript name(s): AC093484.4-001//NONCODE class 'Exonic', External ID: TCONS_00016822 Name: AC093484.4, Ensembl Cross Reference: ENST00000441875 Name: AC093484.4//LNCipedia Identified Transcript//N/A//NONCODE class 'Exonic', Ensembl Cross Reference: ENST00000583241 Name: TRPV2	ENST00000441875.1//ENST00000441875	---	OTTHUMT00000130487.1	lnc-UBB-2:1//lnc-UBB-2:2	NonCoding	NONHSAT145912//NONHSAT145913	---	---	---	chr17	+	16427474	16432269	17p11.2
TSUnmapped00001717.oe.1	0.00131172	up	3.55437	5.57573	5.64663	5.79007	5.35961	5.51484	8.64446	7.15613	7.82678	6.787	6.62049	lnc-CLEC2L-3	LNCipedia Identified Transcript	---	---	---	lnc-CLEC2L-3:3	NonCoding	---	---	---	---	---	---	---	---	---
TSUnmapped00000180.oe.1	0.000711	up	3.55393	6.09218	4.76173	4.92312	4.79283	5.36075	7.92276	6.71941	6.91315	6.58926	6.93312	lnc-POTEG-4	LNCipedia Identified Transcript	---	---	---	lnc-POTEG-4:4	NonCoding	---	---	---	---	---	---	---	---	---
TC0300003263.oe.1	0.000147	up	3.54505	9.096	8.02437	8.87406	8.93802	9.4757	10.6882	10.629	10.9519	10.278	10.9901	lnc-GNB4-1	LNCipedia Identified Transcript//N/A//NONCODE class 'Exonic', External ID: TCONS_00028137 Name: RP11-145M9.4, Ensembl Cross Reference: ENST00000595265 Name: RP11-145M9.4	ENST00000595265	---	---	lnc-GNB4-1:1	NonCoding	NONHSAT093395	---	---	---	chr3	-	179396089	179398177	3q26.33
TC0800000341.oe.1	0.00277867	up	3.53965	7.69337	7.17949	8.37988	7.06593	8.2122	10.6546	8.87564	9.90797	8.90648	9.30424	lnc-GS1-211B7.1.1-4	NONCODE class 'Exonic', Ensembl Cross Reference: ENST00000522099 Name: RBPMS//LNCipedia Identified Transcript	---	---	---	lnc-GS1-211B7.1.1-4:1	NonCoding	NONHSAT125859	---	---	---	chr8	+	30545200	30547519	8p12
TC1100001123.oe.1	0.000736	up	3.53315	8.11651	7.30896	7.54378	7.482	7.93997	10.6756	9.31786	9.38402	8.83834	9.28016	lnc-B3GNT6-2	NONCODE class 'Exonic', Ensembl Cross Reference: ENST00000525325 Name: ACER3//LNCipedia Identified Transcript//NONCODE class 'Exonic', Ensembl Cross Reference: ENST00000527508 Name: ACER3//NONCODE class 'Exonic', Ensembl Cross Reference: ENST00000530921 Name: ACER3	---	---	---	lnc-B3GNT6-2:1	NonCoding	NONHSAT023199//NONHSAT023196//NONHSAT023198	---	---	---	chr11	+	76926557	77020600	11q13.5
TSUnmapped00001150.oe.1	0.0120276	up	3.53133	6.80418	5.58385	6.30364	6.24181	7.40024	6.70402	7.91859	9.47349	8.38533	8.95336	MIR222HG	LNCipedia Identified Transcript	---	---	---	MIR222HG:6	NonCoding	---	---	---	---	---	---	---	---	---
TC0700002008.oe.1	0.00674633	up	3.52974	9.48761	7.13119	7.8083	7.17075	8.32198	10.0796	9.65408	10.2827	10.1075	8.89382	lnc-AOAH-3	LNCipedia Identified Transcript//NONCODE class 'Exonic', Ensembl Cross Reference: ENST00000464262 Name: ELMO1	---	---	---	lnc-AOAH-3:2	NonCoding	NONHSAT147544	---	---	---	chr7	-	36870393	36986116	7p14.2
TC1100002915.oe.1	0.0431455	up	3.52513	5.83929	5.33733	5.94478	5.59638	6.6116	10.2251	7.32362	7.18726	5.76922	7.91253	lnc-CASP5-2	LNCipedia Identified Transcript//NONCODE class 'Exonic', Ensembl Cross Reference: ENST00000527625 Name: CASP1	---	---	---	lnc-CASP5-2:1	NonCoding	NONHSAT023949	---	---	---	chr11	-	105025508	105027172	11q22.3
TC0200004352.oe.1	0.000282	up	3.51106	9.41115	8.80736	9.59646	9.54064	10.2423	11.399	11.0326	11.9421	11.429	10.8547	lnc-GPR155-4	LNCipedia Identified Transcript//NONCODE class 'Exonic', Ensembl Cross Reference: ENST00000467149 Name: WIPF1	---	---	---	lnc-GPR155-4:1	NonCoding	NONHSAT075573	---	---	---	chr2	-	174567077	174570646	2q31.1
TC1600000487.oe.1	0.000462	up	3.50573	6.98686	6.96319	6.6483	7.20897	7.17188	9.80368	8.38798	9.15264	8.57214	8.11132	lnc-CTD-3203P2.2.1-3	LNCipedia Identified Transcript//NONCODE class 'Exonic', Ensembl Cross Reference: ENST00000563787 Name: IL4R	---	---	---	lnc-CTD-3203P2.2.1-3:1	NonCoding	NONHSAT141446	---	---	---	chr16	+	27315397	27345039	16p12.1
TC0300002691.oe.1	0.028908	up	3.50186	14.8618	11.2254	12.0225	12.0688	12.3536	13.8098	14.4082	13.6039	15.2082	14.5425	LINC01279	LNCipedia Identified Transcript//long intergenic non-protein coding RNA 1279 (LINC01279), long non-coding RNA.//long intergenic non-protein coding RNA 1279 [Source:HGNC Symbol;Acc:HGNC:50335]//NONCODE class 'Linc'	ENST00000610103	---	---	LINC01279:1	NonCoding	NONHSAT091188	---	---	NR_109779	chr3	-	112596794	112601969	3q13.2
TC0300000856.oe.1	0.00627149	up	3.49148	9.2505	7.40834	9.08432	8.4868	9.08486	11.0019	10.5878	10.36	11.205	9.17935	lnc-NFKBIZ-2	NONCODE class 'Linc', PubMed Identifer: PMID:23818866 FPKM1_group_21610_transcr//LNCipedia Identified Transcript - Alternate transcript name(s): FPKM1_group_21610_transcript_2	---	---	---	lnc-NFKBIZ-2:1	NonCoding	NONHSAT090915	---	---	---	chr3	+	101863568	101864089	3q12.3
TC0200002089.oe.1	0.011765	up	3.48999	10.3289	7.9242	8.0854	8.1704	9.19711	11.0265	9.8634	11.4352	10.5792	9.81785	lnc-PARD3B-2	NONCODE class 'Exonic', Ensembl Cross Reference: ENST00000483917 Name: NRP2//NONCODE class 'Exonic', Ensembl Cross Reference: ENST00000464003 Name: NRP2//LNCipedia Identified Transcript	---	---	---	lnc-PARD3B-2:1	NonCoding	NONHSAT076518//NONHSAT076519	---	---	---	chr2	+	205681990	205701557	2q33.3
TC0400002160.oe.1	0.00596209	up	3.48936	6.08767	6.48956	7.23693	6.13764	6.99742	9.95524	7.99007	8.46746	7.38654	8.16473	lnc-GPRIN3-2	LNCipedia Identified Transcript//NONCODE class 'Linc', PubMed Identifer: PMID:22140575 mixed_Pred38038 , PubMed Identifer: PMID:22140575 brain_Pred31970	---	---	---	lnc-GPRIN3-2:1	NonCoding	NONHSAT097386	---	---	---	chr4	-	89241270	89243485	4q22.1
TC1000000694.oe.1	9.6e-05	up	3.48628	8.43629	7.20995	7.63378	7.23475	7.83474	9.71558	9.50362	9.52391	9.05051	9.56431	lnc-UNC5B-1	NONCODE class 'Exonic', PubMed Identifer: PMID:22140575 mixed_Pred5673 , PubMed Identifer: PMID:22140575 brain_Pred4593//LNCipedia Identified Transcript	---	---	---	lnc-UNC5B-1:1	NonCoding	NONHSAT013879	---	---	---	chr10	+	71300174	71302878	10q22.1
TSUnmapped00002033.oe.1	0.00219795	up	3.4854	5.70969	5.92624	6.24984	5.59408	6.22447	9.06152	7.33983	8.10601	6.87559	7.32797	lnc-LILRA3-1	LNCipedia Identified Transcript	---	---	---	lnc-LILRA3-1:2	NonCoding	---	---	---	---	---	---	---	---	---
TC0600001610.oe.1	0.0035696	up	3.48453	7.44699	5.57272	5.44328	5.77916	6.4135	8.87526	7.73387	7.80815	7.45783	7.78537	lnc-PLEKHG1-1	NONCODE class 'Sense No Exonic', Ensembl Cross Reference: ENST00000404372 Name: RP1-99E18.2//LNCipedia Identified Transcript	---	---	---	lnc-PLEKHG1-1:1	NonCoding	NONHSAT115547	---	---	---	chr6	+	150934968	150935566	6q25.1
TC0700002009.oe.1	0.00369493	up	3.48191	9.20799	7.00859	7.08369	7.7999	8.18123	9.75784	9.3167	10.2226	9.80988	9.17376	lnc-SFRP4-2	LNCipedia Identified Transcript//NONCODE class 'Exonic', Ensembl Cross Reference: ENST00000463390 Name: ELMO1	---	---	---	lnc-SFRP4-2:1	NonCoding	NONHSAT120145	---	---	---	chr7	-	37269454	37448856	7p14.1
TC1600000785.oe.1	0.00227069	up	3.46556	7.69918	6.04195	6.48407	6.58763	7.2967	9.29759	8.27708	9.23274	7.89272	8.37483	lnc-PAPD5-1	LNCipedia Identified Transcript//NONCODE class 'Linc', PubMed Identifer: PMID:22140575 mixed_Pred18662 , PubMed Identifer: PMID:22140575 brain_Pred15535	---	---	---	lnc-PAPD5-1:1	NonCoding	NONHSAT142400	---	---	---	chr16	+	50105841	50106384	16q12.1
TC0100000423.oe.1	9.87e-06	up	3.45929	12.7788	12.204	12.2827	12.0175	12.7731	13.9491	14.4968	14.2284	14.0386	14.2955	lnc-RHD-3	NONCODE class 'Exonic', Ensembl Cross Reference: ENST00000487234 Name: TMEM50A//LNCipedia Identified Transcript//NONCODE class 'Exonic', Ensembl Cross Reference: ENST00000498135 Name: TMEM50A//NONCODE class 'Exonic', Ensembl Cross Reference: ENST00000468704 Name: TMEM50A	---	---	---	lnc-RHD-3:1	NonCoding	NONHSAT001715//NONHSAT001716//NONHSAT001718	---	---	---	chr1	+	25338317	25360967	1p36.11
TC0200004759.oe.1	0.00108634	up	3.45784	3.69533	3.39112	4.091	3.77943	3.94881	6.24826	5.58724	6.17526	4.35687	5.48742	lnc-CUL3-2	LNCipedia Identified Transcript//NONCODE class 'Exonic', Ensembl Cross Reference: ENST00000472652 Name: DOCK10	---	---	---	lnc-CUL3-2:1	NonCoding	NONHSAT077174	---	---	---	chr2	-	224837729	224840205	2q36.2
TC0Y000352.hg.4	0.0105075	up	3.45157	11.4401	10.2705	11.225	10.5123	11.8179	11.1219	13.505	12.8027	13.1342	13.6384	XGY2//SRY	sex determining region Y//Xg pseudogene, Y-linked 2	---	100132596//6736	---	---	NonCoding	---	Z48513	uc010nwb.1	NR_003254	chrY	+	2752296	2787634	Yp11.31//Yp11.3
TC0800002392.oe.1	0.0171491	up	3.44885	6.80224	5.42196	5.8479	5.36083	5.58913	9.4543	7.24403	8.02655	6.50221	6.72554	lnc-TATDN1-4	NONCODE class 'Exonic', Ensembl Cross Reference: ENST00000519671 Name: MTSS1//LNCipedia Identified Transcript//NONCODE class 'Exonic', Ensembl Cross Reference: ENST00000529463 Name: MTSS1//NONCODE class 'Exonic'	---	---	---	lnc-TATDN1-4:1	NonCoding	NONHSAT128598//NONHSAT128599//NONHSAT128600	---	---	---	chr8	-	124585087	124704200	8q24.13
TC0200004026.oe.1	0.0114563	up	3.44183	3.8121	4.07917	4.04994	4.06406	4.25094	7.31818	5.53963	5.49496	4.16343	6.6559	lnc-LYPD1-2	LNCipedia Identified Transcript//NONCODE class 'Exonic', Ensembl Cross Reference: ENST00000473859 Name: NCKAP5	---	---	---	lnc-LYPD1-2:1	NonCoding	NONHSAT074540	---	---	---	chr2	-	132731949	132782023	2q21.2
TC2100000136.oe.1	2e-05	up	3.43242	4.61853	4.78983	4.63638	4.58066	4.64221	5.90417	6.64031	7.06127	6.21756	6.34043	lnc-GABPA-10	NONCODE class 'Sense No Exonic', Ensembl Cross Reference: ENST00000420965 Name: RNGTTP1//LNCipedia Identified Transcript	---	---	---	lnc-GABPA-10:1	NonCoding	NONHSAT081505	---	---	---	chr21	+	25643489	25644216	21q21.3
TC1000001958.oe.1	0.00016	up	3.42707	6.21762	5.96881	6.90065	5.87856	6.87441	8.29927	7.92904	7.86067	7.96264	8.67333	lnc-SLC16A9-5	LNCipedia Identified Transcript//NONCODE class 'Exonic', Ensembl Cross Reference: ENST00000507862 Name: FAM13C//NONCODE class 'Exonic', Ensembl Cross Reference: ENST00000510215 Name: FAM13C	---	---	---	lnc-SLC16A9-5:1	NonCoding	NONHSAT013520//NONHSAT013523	---	---	---	chr10	-	59300706	59352353	10q21.1
TC2100000139.oe.1	1.01e-05	up	3.427	9.62138	9.70452	9.65968	10.1701	9.60193	11.1974	11.4578	11.567	11.3528	12.0673	lnc-GABPA-8	NONCODE class 'Exonic', Ensembl Cross Reference: ENST00000477351 Name: JAM2//NONCODE class 'Exonic', Ensembl Cross Reference: ENST00000471689 Name: JAM2//LNCipedia Identified Transcript	---	---	---	lnc-GABPA-8:3	NonCoding	NONHSAT081508//NONHSAT081509	---	---	---	chr21	+	25711388	25714889	21q21.3
TC2000000765.oe.1	3.24e-05	up	3.42442	9.46504	9.63232	9.84318	9.97021	10.1267	11.7906	11.5192	11.83	10.9161	11.8608	lnc-FKBP1A-1	NONCODE class 'Exonic', Ensembl Cross Reference: ENST00000460490 Name: FKBP1A//LNCipedia Identified Transcript//NONCODE class 'Exonic', Ensembl Cross Reference: ENST00000474657 Name: FKBP1A	---	---	---	lnc-FKBP1A-1:1	NonCoding	NONHSAT078105//NONHSAT078104	---	---	---	chr20	-	1368978	1375603	20p13
TC0500003068.oe.1	0.00301241	up	3.4238	9.49074	10.5363	10.7533	10.4706	11.1774	11.2482	12.0717	13.1593	12.6619	12.1652	lnc-CSF1R-3	NONCODE class 'Exonic', Ensembl Cross Reference: ENST00000522466 Name: PDGFRB//LNCipedia Identified Transcript	---	---	---	lnc-CSF1R-3:1	NonCoding	NONHSAT104540	---	---	---	chr5	-	150133695	150134110	5q32
TC1200000043.oe.1	0.000135	up	3.41565	5.12298	4.77914	4.49657	5.07477	5.55985	6.67774	6.29393	7.05508	7.34931	6.51806	lnc-FKBP4-4	LNCipedia Identified Transcript//NONCODE class 'Exonic'	---	---	---	lnc-FKBP4-4:1	NonCoding	NONHSAT025458	---	---	---	chr12	+	2512925	2566509	12p13.33
TC0600002427.oe.1	0.000142	up	3.4031	11.5804	10.8337	10.9667	10.6523	11.5875	12.6685	13.0322	13.4616	12.4319	12.8607	lnc-STK38-1	LNCipedia Identified Transcript//NONCODE class 'Exonic'	---	---	---	lnc-STK38-1:1	NonCoding	NONHSAT112221	---	---	---	chr6	-	36493890	36494353	6p21.31
TC0100001830.oe.1	0.00718535	up	3.4017	7.60851	6.0003	6.446	6.57864	7.16146	7.15766	8.28946	9.5816	9.00653	8.59097	lnc-SEMA4A-1	LNCipedia Identified Transcript//NONCODE class 'Exonic', Ensembl Cross Reference: ENST00000506981 Name: LMNA	---	---	---	lnc-SEMA4A-1:1	NonCoding	NONHSAT006813	---	---	---	chr1	+	156137462	156139103	1q22
TC1200000722.oe.1	0.0213645	up	3.39676	7.02804	7.45564	7.66368	7.49204	7.2813	11.3321	8.81393	9.49141	7.98037	8.12369	lnc-PDE1B-2	LNCipedia Identified Transcript//NONCODE class 'Exonic', Ensembl Cross Reference: ENST00000548980 Name: NCKAP1L	---	---	---	lnc-PDE1B-2:1	NonCoding	NONHSAT028637	---	---	---	chr12	+	54532207	54536552	12q13.2
TC0100003260.oe.1	0.0375862	up	3.39042	10.3472	7.05364	7.94128	8.26344	8.14546	9.93579	9.78427	11.0258	11.146	8.66651	lnc-USP48-5	LNCipedia Identified Transcript//NONCODE class 'Exonic', Ensembl Cross Reference: ENST00000498495 Name: HSPG2	---	---	---	lnc-USP48-5:1	NonCoding	NONHSAT001441	---	---	---	chr1	-	21874478	21875208	1p36.12
TC2100000138.oe.1	0.000145	up	3.39019	9.66487	9.19147	9.63166	9.87983	9.52529	10.5995	11.2181	11.7163	11.2046	11.9614	lnc-GABPA-21	LNCipedia Identified Transcript//NONCODE class 'Exonic', Ensembl Cross Reference: ENST00000492962 Name: JAM2	---	---	---	lnc-GABPA-21:1	NonCoding	NONHSAT081507	---	---	---	chr21	+	25702178	25710179	21q21.3
TC0400002239.oe.1	0.012005	up	3.37182	6.51333	6.57087	7.97355	7.14855	6.34396	9.01003	9.98567	8.37401	7.19929	8.74889	lnc-BDH2-1	NONCODE class 'Exonic', Ensembl Cross Reference: ENST00000512806 Name: SLC9B2//LNCipedia Identified Transcript	---	---	---	lnc-BDH2-1:1	NonCoding	NONHSAT097623	---	---	---	chr4	-	103076427	103077202	4q24
TC0X00000762.oe.1	0.002622	up	3.36987	10.846	9.89342	9.76827	9.53447	9.96155	12.0364	11.042	12.7206	12.0586	10.9097	lnc-WDR44-1	NONCODE class 'Exonic', Ensembl Cross Reference: ENST00000498252 Name: DOCK11//LNCipedia Identified Transcript	---	---	---	lnc-WDR44-1:1	NonCoding	NONHSAT138295	---	---	---	chrX	+	118578568	118588310	Xq24
TC1700001199.oe.1	0.00464529	up	3.36915	6.62915	5.35592	6.05694	5.11452	6.4736	7.89925	6.64998	8.19843	8.47684	7.16755	lnc-ACE-2	NONCODE class 'Exonic', Ensembl Cross Reference: ENST00000579541 Name: TANC2//LNCipedia Identified Transcript	---	---	---	lnc-ACE-2:1	NonCoding	NONHSAT055196	---	---	---	chr17	+	63413171	63415585	17q23.3
TC1000002620.oe.1	0.0147778	up	3.36044	7.07206	5.80105	5.72762	5.81308	6.56236	6.65133	7.50211	9.69073	8.08479	7.79045	lnc-DHX32-2	LNCipedia Identified Transcript//NONCODE class 'Exonic', Ensembl Cross Reference: ENST00000467145 Name: ADAM12//NONCODE class 'Exonic', Ensembl Cross Reference: ENST00000482291 Name: ADAM12	---	---	---	lnc-DHX32-2:1	NonCoding	NONHSAT016931//NONHSAT016932	---	---	---	chr10	-	126049603	126070633	10q26.2
TC1300001617.oe.1	0.00423761	up	3.35372	5.84768	5.47146	5.44446	5.76346	5.49549	6.30753	8.41513	7.70899	6.33974	7.97997	lnc-COL4A2-AS2-3	NONCODE class 'Exonic', Ensembl Cross Reference: ENST00000474391 Name: COL4A1//LNCipedia Identified Transcript	---	---	---	lnc-COL4A2-AS2-3:1	NonCoding	NONHSAT035140	---	---	---	chr13	-	110161958	110163558	13q34
TC1100000463.oe.1	0.000164	up	3.35301	9.08752	9.21543	9.48418	8.7905	9.58166	11.1743	10.101	11.2397	11.2882	11.0834	NONHSAG008052//lnc-PDHX-1//RP1-68D18.2//OTTHUMG00000166288	LNCipedia Identified Transcript - Alternate transcript name(s): RP1-68D18.2-001//N/A//NONCODE class 'Sense No Exonic', External ID: TCONS_00005358 Name: RP1-68D18.2, Ensembl Cross Reference: ENST00000510619 Name: RP1-68D18.2	ENST00000510619//ENST00000510619.2	---	OTTHUMT00000388934.1	lnc-PDHX-1:1	NonCoding	NONHSAT018785	---	---	---	chr11	+	35212550	35214007	11p13
TC1100000321.oe.1	0.0179315	up	3.34462	4.11857	3.96543	4.3582	4.32722	4.22563	4.0868	5.18906	7.15036	7.05457	6.22346	lnc-SLC6A5-1	LNCipedia Identified Transcript//NONCODE class 'Exonic', Ensembl Cross Reference: ENST00000524738 Name: NELL1//NONCODE class 'Exonic', Ensembl Cross Reference: ENST00000528046 Name: NELL1	---	---	---	lnc-SLC6A5-1:1	NonCoding	NONHSAT018369//NONHSAT018370	---	---	---	chr11	+	20769225	20885537	11p15.1
TC1100000462.oe.1	0.000834	up	3.34237	8.93108	8.46397	8.95735	7.96181	9.65109	10.959	9.88358	10.784	10.5628	10.4803	lnc-PDHX-4	LNCipedia Identified Transcript//NONCODE class 'Exonic', Ensembl Cross Reference: ENST00000528922 Name: CD44	---	---	---	lnc-PDHX-4:1	NonCoding	NONHSAT018780	---	---	---	chr11	+	35197162	35198555	11p13
TC1500000297.oe.1	0.00553033	up	3.34192	7.75907	6.71034	6.77314	6.85174	7.36965	8.06319	8.95737	9.33192	7.77006	10.0448	lnc-RTF1-2	NONCODE class 'Exonic', Ensembl Cross Reference: ENST00000560318 Name: NUSAP1//LNCipedia Identified Transcript	---	---	---	lnc-RTF1-2:1	NonCoding	NONHSAT041943	---	---	---	chr15	+	41365747	41377288	15q15.1
TC1100001908.oe.1	0.0124766	up	3.33295	6.50358	5.97363	5.67135	5.92634	6.36663	6.10634	7.77822	8.57509	9.15979	7.5061	lnc-GALNTL4-6	LNCipedia Identified Transcript//NONCODE class 'Exonic', Ensembl Cross Reference: ENST00000525927 Name: DKK3	---	---	---	lnc-GALNTL4-6:1	NonCoding	NONHSAT018033	---	---	---	chr11	-	11965873	11979916	11p15.3
TC1000001762.oe.1	0.00289461	up	3.32646	15.762	14.3491	14.5239	14.3649	14.9118	15.3973	16.7456	17.2205	16.3397	16.8783	lnc-NRP1-6	LNCipedia Identified Transcript//NONCODE class 'Exonic', Ensembl Cross Reference: ENST00000464001 Name: ITGB1	---	---	---	lnc-NRP1-6:1	NonCoding	NONHSAT012662	---	---	---	chr10	-	32929932	32932717	10p11.22
TC1500001946.oe.1	0.000285	up	3.32447	5.99867	5.97594	5.02023	5.31099	6.17249	6.90649	7.3015	7.98568	7.45406	7.4962	lnc-TSPAN3-4	long intergenic non-protein coding RNA 597 (LINC00597), long non-coding RNA.//LNCipedia Identified Transcript//NONCODE class 'Sense No Exonic'	---	---	---	lnc-TSPAN3-4:1	NonCoding	NONHSAT047429	---	---	NR_026813	chr15	-	77223908	77225404	15q24.3
TC0100001141.oe.1	0.0019789	up	3.32348	5.51926	5.3346	5.8203	4.92946	5.38989	7.9704	7.37193	7.1138	5.8223	7.37857	lnc-ST6GALNAC5-3//NONHSAG001865	LNCipedia Identified Transcript//NONCODE class 'Exonic', Ensembl Cross Reference: ENST00000466114 Name: AK5	---	---	---	lnc-ST6GALNAC5-3:1	NonCoding	NONHSAT004026	---	---	---	chr1	+	77293793	77298025	1p31.1
TC17_KI270909v1_alt00000002.oe.1	0.00804153	up	3.32049	5.10432	5.0472	4.86126	4.49828	5.07163	6.09102	6.78612	8.46938	5.9587	5.93446	lnc-CCL3L1-1	NONCODE class 'Exonic', Ensembl Cross Reference: ENST00000492788 Name: CCL3L1//LNCipedia Identified Transcript	---	---	---	lnc-CCL3L1-1:1	NonCoding	NONHSAT053196	---	---	---	chr17_KI270909v1_alt	-	250577	252455	17_KI270909v1_alt
TC1300000704.oe.1	0.000243	up	3.30931	9.07097	7.99398	8.38398	7.84715	8.29281	10.6285	10.1366	9.74341	9.62044	10.0927	RP11-128N14.5	N/A	ENST00000613261.1	---	---	---	NonCoding	---	---	---	---	chr13	+	97435946	97436168	13q32.1
TC0300000321.oe.1	0.0143249	up	3.30552	8.04733	7.84208	8.52338	8.43151	8.32741	11.9607	10.2027	9.29381	9.33556	9.00341	lnc-CTDSPL-4	LNCipedia Identified Transcript//NONCODE class 'Exonic', Ensembl Cross Reference: ENST00000461533 Name: ITGA9	---	---	---	lnc-CTDSPL-4:1	NonCoding	NONHSAT089018	---	---	---	chr3	+	37683876	37732999	3p22.2
TSUnmapped00001953.oe.1	0.0308199	up	3.30454	5.5074	5.23444	5.77887	6.38594	6.20954	9.90689	7.06519	7.63617	6.43088	6.6993	lnc-IFI27L1-2	LNCipedia Identified Transcript	---	---	---	lnc-IFI27L1-2:2	NonCoding	---	---	---	---	---	---	---	---	---
TC0Y00000005.oe.1	0.0136621	up	3.3004	4.79384	4.93145	4.94311	5.01361	5.10166	8.14017	5.85514	7.87337	5.88052	5.64766	lnc-RPS4Y1-13	NONCODE class 'Exonic'//LNCipedia Identified Transcript - Alternate transcript name(s): NR_027760	---	---	---	lnc-RPS4Y1-13:1	NonCoding	NONHSAT139265	---	---	---	chrY	+	1268800	1309935	Yp11.2
TC0500001889.oe.1	0.00745107	up	3.28928	5.5558	5.61787	5.98879	4.16957	5.27656	7.32101	7.0405	8.12461	5.82662	6.88471	lnc-TAS2R1-3//CTD-2201E9.2//OTTHUMG00000161717//NONHSAG039838	NONCODE class 'Sense No Exonic', External ID: TCONS_00030500 Name: CTD-2201E9.2, Ensembl Cross Reference: ENST00000515377 Name: CTD-2201E9.2//LNCipedia Identified Transcript - Alternate transcript name(s): CTD-2201E9.2-001//N/A	ENST00000515377.1//ENST00000515377	---	OTTHUMT00000365859.1	lnc-TAS2R1-3:1	NonCoding	NONHSAT100366	---	---	---	chr5	-	9519853	9523178	5p15.31
TC0400000660.oe.1	0.00669193	up	3.28243	6.24063	6.59408	7.22272	5.61374	6.21351	9.16546	7.69313	8.7276	6.93676	7.93554	lnc-ANXA3-5	LNCipedia Identified Transcript//NONCODE class 'Exonic', Ensembl Cross Reference: ENST00000507670 Name: BMP2K	---	---	---	lnc-ANXA3-5:1	NonCoding	NONHSAT097089	---	---	---	chr4	+	78872328	78879432	4q21.21
TC0400001815.oe.1	0.0205844	up	3.28015	4.23531	4.40855	4.51198	4.54012	4.51199	8.51273	5.37407	5.65294	5.74782	5.48918	lnc-APBB2-4	LNCipedia Identified Transcript//NONCODE class 'Exonic', Ensembl Cross Reference: ENST00000515809 Name: RBM47	---	---	---	lnc-APBB2-4:1	NonCoding	NONHSAT096134	---	---	---	chr4	-	40432703	40466645	4p14
TC0200004231.oe.1	0.0414586	up	3.27992	6.38997	5.07153	7.63196	5.68914	8.24418	7.26945	8.74446	9.51978	8.26552	7.79588	lnc-GCG-4	LNCipedia Identified Transcript//NONCODE class 'Exonic', Ensembl Cross Reference: ENST00000468903 Name: DPP4	---	---	---	lnc-GCG-4:1	NonCoding	NONHSAT075190	---	---	---	chr2	-	162016820	162021593	2q24.2
TC1700000865.oe.1	0.00028	up	3.26604	9.70681	8.82662	9.18536	9.14108	9.42624	11.2923	10.8356	11.5261	11.0265	10.1434	lnc-RUNDC3A-5	NONCODE class 'Exonic', Ensembl Cross Reference: ENST00000590984 Name: GRN//LNCipedia Identified Transcript//NONCODE class 'Exonic', Ensembl Cross Reference: ENST00000589923 Name: GRN//NONCODE class 'Exonic', Ensembl Cross Reference: ENST00000585348 Name: GRN	---	---	---	lnc-RUNDC3A-5:1	NonCoding	NONHSAT053945//NONHSAT053946//NONHSAT053944	---	---	---	chr17	+	44350289	44351795	17q21.31
TC0800002391.oe.1	0.00690088	up	3.26582	6.33747	5.29068	5.45017	5.05292	5.8602	8.86743	6.55988	7.42778	6.83335	6.84022	lnc-TATDN1-3	LNCipedia Identified Transcript//NONCODE class 'Exonic', Ensembl Cross Reference: ENST00000519226 Name: MTSS1//NONCODE class 'Exonic', Ensembl Cross Reference: ENST00000522722 Name: MTSS1	---	---	---	lnc-TATDN1-3:1	NonCoding	NONHSAT128596//NONHSAT128597	---	---	---	chr8	-	124556261	124566209	8q24.13
TC0100002172.oe.1	0.00870184	up	3.26494	6.08303	6.27022	6.13265	6.30822	6.02293	9.19419	7.47823	8.84903	6.64091	7.18997	lnc-DHX9-2	LNCipedia Identified Transcript//NONCODE class 'Exonic', Ensembl Cross Reference: ENST00000460179 Name: NPL	---	---	---	lnc-DHX9-2:1	NonCoding	NONHSAT008334	---	---	---	chr1	+	182818638	182829909	1q25.3
TC0400002075.oe.1	0.000723	up	3.25823	7.30192	7.01419	6.85691	6.33953	7.45751	9.19639	8.00442	9.36662	8.55447	8.36858	lnc-GK2-4	LNCipedia Identified Transcript//NONCODE class 'Exonic', Ensembl Cross Reference: ENST00000514959 Name: ANTXR2	---	---	---	lnc-GK2-4:1	NonCoding	NONHSAT097127	---	---	---	chr4	-	80054281	80079600	4q21.21
TC1500001415.oe.1	0.00406123	up	3.24566	6.68466	6.23089	6.28758	5.5496	6.66236	9.06353	8.01561	8.3233	6.78081	7.72442	lnc-SPTBN5-4	LNCipedia Identified Transcript//NONCODE class 'Exonic'	---	---	---	lnc-SPTBN5-4:1	NonCoding	NONHSAT041986	---	---	---	chr15	-	41899432	41900010	15q15.1
TC0300000627.oe.1	0.00111041	up	3.24513	6.84446	7.44158	7.77971	7.3097	8.27764	9.91666	8.69733	9.58314	8.667	9.28036	lnc-C3orf14-2	LNCipedia Identified Transcript//NONCODE class 'Sense No Exonic', External ID: TCONS_00026716	---	---	---	lnc-C3orf14-2:1	NonCoding	NONHSAT090171	---	---	---	chr3	+	61679556	61681172	3p14.2
TC0100004100.oe.1	0.0165597	up	3.23215	4.23275	4.45656	4.60469	4.48601	4.21549	5.10879	5.09681	7.8415	5.45593	6.95494	NONHSAG002125//lnc-ARHGAP29-7	NONCODE class 'Exonic', Ensembl Cross Reference: ENST00000480356 Name: F3//LNCipedia Identified Transcript	---	---	---	lnc-ARHGAP29-7:1	NonCoding	NONHSAT004593	---	---	---	chr1	-	94533106	94541759	1p21.3
TC0200001115.oe.1	0.000338	up	3.23143	8.18714	7.86469	8.5023	8.53142	9.08233	10.0804	9.86727	10.9	9.80855	9.97257	lnc-AC005035.1-3	LNCipedia Identified Transcript//NONCODE class 'Exonic', Ensembl Cross Reference: ENST00000489490 Name: MAP4K4	---	---	---	lnc-AC005035.1-3:1	NonCoding	NONHSAT072833	---	---	---	chr2	+	101825319	101829754	2q11.2
TC1500000803.oe.1	0.00324684	up	3.22498	4.27695	3.78201	4.14175	3.50514	3.84491	6.57297	6.08429	5.67832	4.29041	5.37123	lnc-DNAJA4-2	LNCipedia Identified Transcript//NONCODE class 'Exonic', Ensembl Cross Reference: ENST00000560753 Name: CRABP1	---	---	---	lnc-DNAJA4-2:1	NonCoding	NONHSAT047564	---	---	---	chr15	+	78347821	78348221	15q25.1
TC0100002340.oe.1	0.00257129	up	3.21889	7.72325	6.38292	6.83027	6.80185	7.28438	7.93077	8.52645	9.82975	8.78605	8.38248	lnc-NAV1-4	LNCipedia Identified Transcript - Alternate transcript name(s): expReg_chr1_21908_+	---	---	---	lnc-NAV1-4:1	NonCoding	---	---	---	---	chr1	+	201573138	201573382	1q32.1
TC0500001392.oe.1	0.00947361	up	3.21727	5.81897	4.4321	4.56293	4.78277	4.82322	7.18065	5.82519	7.98329	5.95329	5.90677	lnc-AFAP1L1-1	LNCipedia Identified Transcript//NONCODE class 'Exonic', Ensembl Cross Reference: ENST00000502855 Name: ABLIM3	---	---	---	lnc-AFAP1L1-1:1	NonCoding	NONHSAT104484	---	---	---	chr5	+	149252344	149258574	5q32
TC1600001856.oe.1	0.00109554	up	3.2167	7.44756	6.91828	6.73156	7.17201	7.5311	9.52475	9.50761	8.32447	8.02798	8.84361	lnc-COG7-2//NONHSAG018883//OTTHUMG00000177263//RP11-20G6.3	NONCODE class 'Exonic', External ID: TCONS_00015126 Name: RP11-20G6.3, Ensembl Cross Reference: ENST00000563129 Name: RP11-20G6.3//LNCipedia Identified Transcript//N/A//LNCipedia Identified Transcript - Alternate transcript name(s): RP11-20G6.3-001	ENST00000563129.2//ENST00000563129	---	OTTHUMT00000436062.1	lnc-COG7-2:2//lnc-COG7-2:1	NonCoding	NONHSAT141098	---	---	---	chr16	-	23061406	23064173	16p12.2
TC1300000813.oe.1	5.14e-05	up	3.21449	5.46464	5.30636	5.24237	5.29013	5.49817	6.58089	7.12564	7.47911	6.53755	7.50142	lnc-CARKD-3	NONCODE class 'Exonic', Ensembl Cross Reference: ENST00000478681 Name: COL4A2//NONCODE class 'Exonic', Ensembl Cross Reference: ENST00000480771 Name: COL4A2//NONCODE class 'Exonic'//LNCipedia Identified Transcript//NONCODE class 'Exonic', Ensembl Cross Reference: ENST00000494852 Name: COL4A2//NONCODE class 'Exonic', Ensembl Cross Reference: ENST00000483683 Name: COL4A2//NONCODE class 'Exonic', En…	---	---	---	lnc-CARKD-3:1	NonCoding	NONHSAT035151//NONHSAT035146//NONHSAT035143//NONHSAT035149//NONHSAT035150//NONHSAT035142	---	---	---	chr13	+	110307267	110485757	13q34
TC0500002213.oe.1	7.59e-06	up	3.21294	6.12207	6.26749	6.30627	5.72563	6.34145	8.22536	7.75274	7.80539	7.47813	7.92075	lnc-PPAP2A-1	LNCipedia Identified Transcript//NONCODE class 'Antisense'	---	---	---	lnc-PPAP2A-1:1	NonCoding	NONHSAT101495	---	---	---	chr5	-	55421526	55423800	5q11.2
TC09001056.hg.4	0.000423	up	3.1999	13.6701	13.7416	13.4866	13.5954	14.5994	15.2117	15.7869	15.7285	14.8077	15.9484	RMRP	RNA component of mitochondrial RNA processing endoribonuclease	ENST00000363046	6023	---	---	NonCoding	---	---	uc003zxh.2	NR_003051	chr9	-	35657751	35658018	9p21-p12
TC0400001125.oe.1	0.000387	up	3.19778	4.11766	4.44849	4.44601	4.3143	4.43332	6.14655	6.00127	6.20417	5.03415	6.759	lnc-TMEM184C-2//NONHSAG039063//RP11-752L20.3	LNCipedia Identified Transcript//NONCODE class 'Sense No Exonic'//N/A	ENST00000623125.1	---	---	lnc-TMEM184C-2:1	NonCoding	NONHSAT098682	---	---	---	chr4	+	147486829	147496062	4q31.22
TC0400002292.oe.1	0.0119194	up	3.19385	9.64316	7.19575	7.28562	7.46582	8.73364	10.2882	9.72025	9.25085	9.99837	9.44285	lnc-PLA2G12A-1	NONCODE class 'Exonic', Ensembl Cross Reference: ENST00000515512 Name: CFI//LNCipedia Identified Transcript	---	---	---	lnc-PLA2G12A-1:1	NonCoding	NONHSAT097794	---	---	---	chr4	-	109741876	109746292	4q25
TC0200004786.oe.1	0.00119806	up	3.18875	9.77447	9.56794	9.58131	9.8512	9.69671	10.1449	11.344	12.0641	11.9094	11.3741	lnc-DNER-3	NONCODE class 'Exonic', Ensembl Cross Reference: ENST00000477441 Name: TRIP12//LNCipedia Identified Transcript	---	---	---	lnc-DNER-3:1	NonCoding	NONHSAT077249	---	---	---	chr2	-	229810957	229814493	2q36.3
TC1000001979.oe.1	0.0231626	up	3.18679	8.74128	7.43267	7.4703	6.78219	7.20968	10.7286	7.97727	9.51821	9.54047	8.23215	lnc-RTKN2-1	LNCipedia Identified Transcript - Alternate transcript name(s): ENST00000503286	---	---	---	lnc-RTKN2-1:1	NonCoding	---	---	---	---	chr10	-	62092764	62096941	10q21.2
TC03001957.hg.4	0.0205682	up	3.1849	12.1416	12.6368	11.7874	11.0181	13.5543	12.9392	14.414	15.0581	13.1137	13.9693	SCARNA7	small Cajal body-specific RNA 7	ENST00000458797	677767	---	---	NonCoding	---	---	uc003fdo.3	NR_003001	chr3	-	160514907	160515236	3q25.22
TC0200002412.oe.1	0.0185109	up	3.18171	6.63446	5.88459	6.29527	6.82983	6.42788	10.1944	7.53738	8.03799	7.31381	7.33751	lnc-ATG16L1-4	LNCipedia Identified Transcript//NONCODE class 'Exonic', Ensembl Cross Reference: ENST00000493078 Name: INPP5D	---	---	---	lnc-ATG16L1-4:1	NonCoding	NONHSAT077459	---	---	---	chr2	+	233161789	233169329	2q37.1
TC1900000168.oe.1	0.00201533	up	3.17607	11.7837	11.5356	10.3741	10.3709	11.2195	12.7175	12.0805	13.0737	13.3482	12.4003	CTC-518P12.6//lnc-FEM1A-4//NONHSAG024544	NONCODE class 'Antisense', External ID: TCONS_00019109 Name: CTC-518P12.6, Ensembl Cross Reference: ENST00000591657 Name: CTC-518P12.6//LNCipedia Identified Transcript//N/A	ENST00000591657//ENST00000591657.1	---	---	lnc-FEM1A-4:1	NonCoding	NONHSAT060659	---	---	---	chr19	+	4838332	4838907	19p13.3
TC1400001900.oe.1	0.00221654	up	3.17365	6.21662	5.28822	5.32224	6.00805	6.67925	7.85579	7.06536	7.65075	8.36415	6.90903	lnc-TRIP11-2	LNCipedia Identified Transcript//NONCODE class 'Exonic', Ensembl Cross Reference: ENST00000557462 Name: FBLN5	---	---	---	lnc-TRIP11-2:1	NonCoding	NONHSAT039290	---	---	---	chr14	-	91937011	91947236	14q32.12
TC0200004874.oe.1	0.0150623	up	3.17108	6.38745	5.38127	5.48585	5.22759	5.97081	6.1456	6.58611	8.86075	8.08523	7.10014	AC112721.1	N/A	ENST00000409162.1	---	---	---	NonCoding	---	---	---	---	chr2	-	237421420	237425276	2q37.3
TC0100005296.oe.1	0.00306053	up	3.17051	8.40571	6.51361	7.03059	7.19329	7.84995	8.82167	8.46685	9.32162	8.94253	9.76406	lnc-LBR-3	LNCipedia Identified Transcript - Alternate transcript name(s): NONHSAT009842	---	---	---	lnc-LBR-3:1	NonCoding	---	---	---	---	chr1	-	225577218	225587099	1q42.12
TC0800000744.oe.1	0.028671	up	3.16984	3.75494	3.81206	3.67934	4.03751	3.98646	7.43136	3.95812	4.88707	4.88719	6.42864	lnc-FAM164A-1//NONHSAG050578//OTTHUMG00000173421//RP11-79H23.3	LNCipedia Identified Transcript - Alternate transcript name(s): RP11-79H23.3-001//NONCODE class 'Linc', External ID: TCONS_00036439 Name: RP11-79H23.3, Ensembl Cross Reference: ENST00000565297 Name: RP11-79H23.3//N/A	ENST00000565297//ENST00000565297.1	---	OTTHUMT00000423044.1	lnc-FAM164A-1:1	NonCoding	NONHSAT127376	---	---	---	chr8	+	78837529	78840522	8q21.13
TC0200003819.oe.1	0.000408	up	3.16718	6.64682	6.26305	6.3422	6.52859	6.60819	7.47461	8.13135	9.00233	7.64079	8.45577	lnc-AC108463.1-5	LNCipedia Identified Transcript//NONCODE class 'Linc', Ensembl Cross Reference: ENST00000450258 Name: AC108463.2	---	---	---	lnc-AC108463.1-5:1	NonCoding	NONHSAT073619	---	---	---	chr2	-	111203964	111206215	2q13
TC0X00000546.oe.1	0.000781	up	3.15853	5.77367	5.349	6.27127	5.85751	6.04743	8.51728	7.08147	7.67085	6.98083	7.34473	lnc-ZCCHC13-10	NONCODE class 'Linc', Ensembl Cross Reference: ENST00000373488 Name: BMP2KL//LNCipedia Identified Transcript	---	---	---	lnc-ZCCHC13-10:1	NonCoding	NONHSAT137600	---	---	---	chrX	+	74186940	74187155	Xq13.2
TC0300002795.oe.1	0.000546	up	3.15337	5.87306	5.05743	5.55833	6.22399	6.22441	8.14842	7.12804	7.64849	7.15974	7.13701	lnc-MUC13-6	LNCipedia Identified Transcript//NONCODE class 'Exonic', Ensembl Cross Reference: ENST00000488654 Name: HEG1	---	---	---	lnc-MUC13-6:1	NonCoding	NONHSAT091579	---	---	---	chr3	-	125009515	125010549	3q21.2
TC0500002201.oe.1	0.0116352	up	3.14635	8.85259	8.34311	8.59193	8.59605	9.11801	11.5527	10.0167	10.9594	8.66528	10.5761	lnc-MOCS2-8	LNCipedia Identified Transcript - Alternate transcript name(s): expReg_chr5_2018_-	---	---	---	lnc-MOCS2-8:1	NonCoding	---	---	---	---	chr5	-	54011393	54011596	5q11.2
TC1100001909.oe.1	0.0422809	up	3.14387	12.2184	10.7245	10.0119	10.4646	11.4118	10.4474	13.0333	13.4128	13.5523	12.6482	lnc-GALNTL4-7	LNCipedia Identified Transcript//NONCODE class 'Exonic', Ensembl Cross Reference: ENST00000531309 Name: DKK3	---	---	---	lnc-GALNTL4-7:1	NonCoding	NONHSAT018034	---	---	---	chr11	-	11998200	12002426	11p15.3
TC0300002014.oe.1	0.0170062	up	3.14346	11.5398	9.84703	9.6833	8.53936	10.2576	10.9486	11.2464	11.8585	11.6074	12.4679	lnc-HACL1-8	LNCipedia Identified Transcript - Alternate transcript name(s): expReg_chr3_846_-	---	---	---	lnc-HACL1-8:1	NonCoding	---	---	---	---	chr3	-	15772213	15772491	3p25.1
TC1200001008.oe.1	0.00528227	up	3.13914	3.61777	4.30066	3.34704	3.79674	3.72478	6.33849	4.63589	6.1247	4.28453	5.65519	lnc-SYT1-7	LNCipedia Identified Transcript//NONCODE class 'Exonic', Ensembl Cross Reference: ENST00000547884 Name: NAV3	---	---	---	lnc-SYT1-7:1	NonCoding	NONHSAT029624	---	---	---	chr12	+	78199159	78200562	12q21.2
TC1700002261.oe.1	0.021951	up	3.13824	4.3278	3.91231	4.72609	4.22094	4.21892	6.07179	5.17297	8.06031	4.8959	5.45487	lnc-CCL3L3-1	LNCipedia Identified Transcript//NONCODE class 'Exonic', Ensembl Cross Reference: ENST00000589736 Name: CCL3L3//NONCODE class 'Exonic', Ensembl Cross Reference: ENST00000588817 Name: CCL3L3	---	---	---	lnc-CCL3L3-1:1	NonCoding	NONHSAT053188//NONHSAT053189	---	---	---	chr17	-	36194869	36196747	17q12
TC1400000770.oe.1	0.00114218	up	3.13469	5.70047	6.07457	7.09923	6.15852	6.15664	8.12041	7.0979	8.57506	7.84118	7.79649	lnc-RP11-497E19.2.1-3	NONCODE class 'Exonic', Ensembl Cross Reference: ENST00000556335 Name: FLRT2//NONCODE class 'Exonic', Ensembl Cross Reference: ENST00000557419 Name: FLRT2//LNCipedia Identified Transcript//NONCODE class 'Exonic', Ensembl Cross Reference: ENST00000555398 Name: FLRT2//NONCODE class 'Exonic', External ID: TCONS_00011107 Name: FLRT2, Ensembl Cross Reference: ENST00000553627 Name: FLRT2	---	---	---	lnc-RP11-497E19.2.1-3:1	NonCoding	NONHSAT038121//NONHSAT038122//NONHSAT038123//NONHSAT038120	---	---	---	chr14	+	85530146	85563052	14q31.3
TC0200002722.oe.1	8.5e-06	up	3.13015	6.94583	6.28176	6.20857	6.51745	6.75575	7.99184	8.3258	8.44912	8.02435	8.14941	lnc-E2F6-4	LNCipedia Identified Transcript//NONCODE class 'Exonic', Ensembl Cross Reference: ENST00000484951 Name: ROCK2	---	---	---	lnc-E2F6-4:1	NonCoding	NONHSAT069152	---	---	---	chr2	-	11217776	11221340	2p25.1
TC0600002543.oe.1	0.00275793	up	3.12658	4.75474	4.99606	4.93061	5.11625	5.08163	7.90703	6.47145	5.95208	5.81011	6.96154	lnc-GPR110-2	LNCipedia Identified Transcript - Alternate transcript name(s): NONHSAT113022	---	---	---	lnc-GPR110-2:1	NonCoding	---	---	---	---	chr6	-	46866255	46869117	6p12.3
TC2200001068.oe.1	0.000383	up	3.10941	8.76375	7.56656	7.91035	7.74789	8.4326	9.99078	9.39559	10.2289	9.62005	9.36906	lnc-APOL2-2	NONCODE class 'Exonic'//LNCipedia Identified Transcript//NONCODE Identified Transcript, Ensembl Cross Reference: ENST00000495928 Name: MYH9	---	---	---	lnc-APOL2-2:1	NonCoding	NONHSAT085100//NONHSAT085099	---	---	---	chr22	-	36295546	36301714	22q12.3
TC1300000570.oe.1	0.00114954	up	3.10785	6.1145	6.65077	7.06811	5.76856	6.45813	8.02882	7.77843	8.06909	7.43972	8.92357	lnc-AL359392.1-4	NONCODE class 'Exonic', Ensembl Cross Reference: ENST00000532785 Name: LMO7//LNCipedia Identified Transcript	---	---	---	lnc-AL359392.1-4:1	NonCoding	NONHSAT034372	---	---	---	chr13	+	75816786	75819498	13q22.2
TC0300002384.oe.1	0.023457	up	3.0957	6.64543	6.77823	6.52907	6.27745	7.53183	6.65955	7.91481	9.89579	9.04766	8.39552	lnc-PBRM1-2	NONCODE class 'Exonic', Ensembl Cross Reference: ENST00000490681 Name: NT5DC2//LNCipedia Identified Transcript	---	---	---	lnc-PBRM1-2:1	NonCoding	NONHSAT089935	---	---	---	chr3	-	52528913	52532514	3p21.1
TC1000000978.oe.1	0.00846322	up	3.09504	5.14684	4.43593	5.02506	4.68636	4.91401	7.66124	6.31277	5.91541	5.17742	7.29114	lnc-ENTPD1-2	LNCipedia Identified Transcript//NONCODE class 'Linc'	---	---	---	lnc-ENTPD1-2:1	NonCoding	NONHSAT015779	---	---	---	chr10	+	95880076	95900155	10q24.1
TC1000001957.oe.1	0.00118444	up	3.09465	5.93566	5.76914	6.46961	5.2684	6.75729	8.10428	6.90465	7.88831	7.72562	7.72611	lnc-SLC16A9-6	NONCODE class 'Exonic', Ensembl Cross Reference: ENST00000507568 Name: FAM13C//LNCipedia Identified Transcript//NONCODE class 'Exonic', Ensembl Cross Reference: ENST00000477101 Name: FAM13C	---	---	---	lnc-SLC16A9-6:1	NonCoding	NONHSAT013518//NONHSAT013517	---	---	---	chr10	-	59268592	59297258	10q21.1
TC0X00001877.oe.1	0.0317571	up	3.09189	5.1621	5.99853	5.84558	6.51237	6.52455	9.7897	6.78233	7.19674	6.62783	7.78899	lnc-MAGEA10-4	LNCipedia Identified Transcript//NONCODE class 'Exonic', Ensembl Cross Reference: ENST00000495862 Name: GABRE//NONCODE class 'Exonic', Ensembl Cross Reference: ENST00000462018 Name: GABRE	---	---	---	lnc-MAGEA10-4:1	NonCoding	NONHSAT139020//NONHSAT139019	---	---	---	chrX	-	151955053	151957512	Xq28
TC0100004237.oe.1	0.0134865	up	3.08921	3.38887	3.53791	3.46138	3.88775	3.62259	6.91954	4.30251	5.80112	4.30275	4.70878	lnc-WDR77-6	LNCipedia Identified Transcript//NONCODE class 'Exonic', Ensembl Cross Reference: ENST00000486342 Name: ADORA3	---	---	---	lnc-WDR77-6:1	NonCoding	NONHSAT005193	---	---	---	chr1	-	111500510	111503087	1p13.2
TC0500002683.oe.1	0.0289479	up	3.0828	9.52548	10.0435	10.297	10.5316	10.3309	9.43534	12.4791	12.1662	12.3213	12.4477	lnc-STARD4-4	NONCODE class 'Exonic', Ensembl Cross Reference: ENST00000505864 Name: NREP//NONCODE class 'Exonic', Ensembl Cross Reference: ENST00000503429 Name: NREP//LNCipedia Identified Transcript//NONCODE class 'Exonic', Ensembl Cross Reference: ENST00000507742 Name: NREP//NONCODE class 'Exonic', Ensembl Cross Reference: ENST00000513684 Name: NREP	---	---	---	lnc-STARD4-4:1	NonCoding	NONHSAT103202//NONHSAT103203//NONHSAT103204//NONHSAT103201	---	---	---	chr5	-	111730642	111757633	5q22.1
TC1000000841.oe.1	0.0141437	up	3.07678	6.62272	6.5861	6.91784	6.46762	7.06844	10.2835	8.09917	8.09105	7.27192	8.02416	lnc-SH2D4B-5	NONCODE class 'Exonic', Ensembl Cross Reference: ENST00000265450 Name: TSPAN14//LNCipedia Identified Transcript	---	---	---	lnc-SH2D4B-5:1	NonCoding	NONHSAT015258	---	---	---	chr10	+	80515467	80519635	10q23.1
TC0600002615.oe.1	0.0179288	up	3.07251	6.81402	5.6374	5.89108	6.24586	6.52693	6.35358	7.71746	9.49472	8.04265	7.60397	lnc-RAB23-10	LNCipedia Identified Transcript//NONCODE class 'Sense No Exonic'	---	---	---	lnc-RAB23-10:1	NonCoding	NONHSAT113254	---	---	---	chr6	-	56952841	56953574	6p12.1
TC1200001334.oe.1	0.00190094	up	3.07111	4.3722	4.26145	4.62815	4.54739	4.51989	7.26345	5.46103	6.51819	5.61632	5.56389	lnc-OAS2-2	LNCipedia Identified Transcript//NONCODE class 'Exonic', Ensembl Cross Reference: ENST00000549918 Name: OAS3	---	---	---	lnc-OAS2-2:1	NonCoding	NONHSAT030815	---	---	---	chr12	+	112969332	112970705	12q24.13
TC1600002202.oe.1	6.34e-05	up	3.06322	6.41708	5.60363	5.85884	6.2798	6.58789	7.40994	7.84464	7.97123	7.61933	7.97733	XLOC_011950//lnc-IRX3-4//OTTHUMG00000172236//CRNDE//NONHSAG019500	NONCODE class 'Linc', External ID: TCONS_00014145 Name: CRNDE, Ensembl Cross Reference: ENST00000560912 Name: CRNDE//NONCODE class 'Linc', External ID: TCONS_00014144 Name: CRNDE, Ensembl Cross Reference: ENST00000559432 Name: CRNDE//NONCODE class 'Linc', External ID: TCONS_00014139 Name: CRNDE, Ensembl Cross Reference: ENST00000501177 Name: CRNDE//NONCODE class 'Linc', External ID: TCONS_0001414…	ENST00000501177.6//ENST00000502066.5//ENST00000559432//ENST00000558031//ENST00000558952//ENST00000560029.4//ENST00000560912//ENST00000558031.4//ENST00000557792.1//ENST00000558952.1//ENST00000560208.1//ENST00000559432.4//ENST00000557792//ENST00000560029//ENST00000560208//ENST00000559598//ENST00000502066//ENST00000559598.5//ENST00000501177//ENST00000560912.4	---	OTTHUMT00000417435.1//OTTHUMT00000417433.1//OTTHUMT00000417434.1//OTTHUMT00000417436.1//OTTHUMT00000417438.1//OTTHUMT00000417431.1//OTTHUMT00000417439.1//OTTHUMT00000417432.1//OTTHUMT00000417430.2//OTTHUMT00000417437.1	lnc-IRX3-4:15//lnc-IRX3-4:8//lnc-IRX3-4:14//lnc-IRX3-4:20//lnc-IRX3-4:10//lnc-IRX3-4:12//lnc-IRX3-4:9//lnc-IRX3-4:19//lnc-IRX3-4:25//lnc-IRX3-4:24//lnc-IRX3-4:21//lnc-IRX3-4:16//lnc-IRX3-4:22//lnc-IRX3-4:5//lnc-IRX3-4:6//lnc-IRX3-4:18//lnc-IRX3-4:11//lnc-IRX3-4:7//lnc-IRX3-4:13//lnc-IRX3-4:23//lnc-IRX3-4:2//lnc-IRX3-4:3//lnc-IRX3-4:4//lnc-IRX3-4:17//lnc-IRX3-4:1//lnc-IRX3-4:26	NonCoding	NONHSAT142610//NONHSAT142616//NONHSAT142620//NONHSAT142613//NONHSAT142615//NONHSAT142609//NONHSAT142619//NONHSAT142608//NONHSAT142617//NONHSAT142614//NONHSAT142611//NONHSAT142612//NONHSAT142618	TCONS_00024662//TCONS_00024663//TCONS_00024270//TCONS_00024236//TCONS_00024235//TCONS_00024664//TCONS_00024665	---	NR_034105//NR_110454//NR_034106//NR_110453	chr16	-	54917939	54929641	16q12.2
TC1200000455.oe.1	0.00245903	up	3.06238	7.80721	6.1547	6.6115	6.90221	6.96032	8.28558	7.91737	9.2504	8.944	8.11187	RP11-817I4.1	N/A	ENST00000622688.1	---	---	---	NonCoding	---	---	---	---	chr12	+	32339368	32340724	12p11.21
TC0900000972.oe.1	0.000165	up	3.05538	7.66154	8.05386	8.1909	7.31488	8.21428	9.80949	9.33955	9.95859	9.3604	9.02418	lnc-ATP6V1G1-3	LNCipedia Identified Transcript//NONCODE class 'Exonic', Ensembl Cross Reference: ENST00000482552 Name: C9orf91	---	---	---	lnc-ATP6V1G1-3:1	NonCoding	NONHSAT134390	---	---	---	chr9	+	114643267	114644704	9q32
TC0400002243.oe.1	7.78e-05	up	3.05272	4.81673	4.63786	4.68824	4.57927	5.08583	6.34665	6.15745	6.96868	5.79064	6.59498	lnc-BDH2-5	LNCipedia Identified Transcript//NONCODE class 'Exonic', Ensembl Cross Reference: ENST00000509120 Name: CENPE	---	---	---	lnc-BDH2-5:1	NonCoding	NONHSAT097627	---	---	---	chr4	-	103180305	103181963	4q24
TC0200004353.oe.1	0.00034	up	3.05009	8.64737	8.08091	8.46379	8.29468	9.00831	10.2875	9.63411	10.8768	9.8733	9.86758	lnc-GPR155-5	LNCipedia Identified Transcript//NONCODE class 'Exonic', Ensembl Cross Reference: ENST00000480400 Name: WIPF1	---	---	---	lnc-GPR155-5:1	NonCoding	NONHSAT075575	---	---	---	chr2	-	174581140	174597804	2q31.1
TC1200002590.oe.1	0.000529	up	3.04511	4.99894	4.98019	4.98032	4.81535	4.83283	6.04792	6.19825	6.90686	6.0166	7.47048	lnc-E2F7-6	LNCipedia Identified Transcript//NONCODE class 'Exonic', Ensembl Cross Reference: ENST00000547557 Name: CSRP2	---	---	---	lnc-E2F7-6:1	NonCoding	NONHSAT029596	---	---	---	chr12	-	76865669	76878997	12q21.2
TC0200004145.oe.1	0.0281086	up	3.04299	7.54482	5.15006	5.59255	5.13558	6.16884	8.95037	7.09753	7.79094	7.10453	6.67593	lnc-NMI-2	LNCipedia Identified Transcript//NONCODE class 'Antisense'	---	---	---	lnc-NMI-2:1	NonCoding	NONHSAT074954	---	---	---	chr2	-	151379494	151379864	2q23.3
TC2100000344.oe.1	0.00285992	up	3.04189	8.43571	7.92981	7.90201	7.85569	8.37009	8.79583	9.58505	10.9659	9.81025	9.36116	lnc-FAM3B-5	LNCipedia Identified Transcript//NONCODE class 'Exonic'	---	---	---	lnc-FAM3B-5:1	NonCoding	NONHSAT082244	---	---	---	chr21	+	41245959	41275538	21q22.3
TC1700001170.oe.1	0.00548739	up	3.03764	5.41946	5.15202	5.37048	5.07932	5.52089	7.57629	7.43776	6.29684	5.56956	7.67648	lnc-C17orf82-1	LNCipedia Identified Transcript//NONCODE class 'Exonic'	---	---	---	lnc-C17orf82-1:1	NonCoding	NONHSAT055133	---	---	---	chr17	+	61401773	61403163	17q23.2
TC1200000721.oe.1	0.0039935	up	3.0374	6.31372	6.55306	6.25916	5.87417	6.32584	8.91374	8.3921	8.01385	6.76414	7.25629	lnc-PDE1B-4	LNCipedia Identified Transcript - Alternate transcript name(s): expReg_chr12_5678_+	---	---	---	lnc-PDE1B-4:1	NonCoding	---	---	---	---	chr12	+	54508252	54508461	12q13.2
TC1900001119.oe.1	0.00014	up	3.03587	10.2461	9.67365	10.0336	10.3079	10.4927	11.3816	11.9608	12.197	12.0027	11.2224	lnc-SYNGR4-1	LNCipedia Identified Transcript//NONCODE class 'Exonic', Ensembl Cross Reference: ENST00000597529 Name: EMP3	---	---	---	lnc-SYNGR4-1:1	NonCoding	NONHSAT067064	---	---	---	chr19	+	48325547	48327800	19q13.33
TC0800001791.oe.1	0.0177361	up	3.02704	4.42442	4.18185	5.96018	5.79123	5.64978	8.11784	6.07172	5.97167	6.81538	7.0204	lnc-ATP6V1H-1//OTTHUMG00000164264//XLOC_007085//NONHSAG050230//RP11-400K9.4	N/A//NONCODE class 'Linc'//gene_id XLOC_007085; transcript_id TCONS_00014514; oId ucscTCONS_00070051; linc_name linc-OPRK1-4; tss_id TSS11350; class_code .; gene_name linc-OPRK1-4;//LNCipedia Identified Transcript//LNCipedia Identified Transcript - Alternate transcript name(s): RP11-400K9.4-001//NONCODE class 'Linc', External ID: TCONS_00036773 Name: RP11-400K9.4, Ensembl Cross Reference: ENST000…	ENST00000426023.1//ENST00000426023	---	OTTHUMT00000377988.1	lnc-ATP6V1H-1:3//lnc-ATP6V1H-1:1//lnc-ATP6V1H-1:2	NonCoding	NONHSAT126595//NONHSAT126597//NONHSAT126594	TCONS_00014514	---	---	chr8	-	53514075	53523931	8q11.23
TC1200000847.oe.1	0.000738	up	3.02446	6.86006	6.65191	6.61169	7.13994	7.35646	9.04033	7.77116	9.20544	8.22443	8.36209	NONHSAG011520//OTTHUMG00000168751//lnc-TMEM5-1//RP11-274J7.2	LNCipedia Identified Transcript - Alternate transcript name(s): RP11-274J7.2-001//NONCODE class 'Sense No Exonic', External ID: TCONS_00007358 Name: RP11-274J7.2, Ensembl Cross Reference: ENST00000541870 Name: RP11-274J7.2//N/A	ENST00000541870.1//ENST00000541870	---	OTTHUMT00000400902.1	lnc-TMEM5-1:1	NonCoding	NONHSAT029124	---	---	---	chr12	+	63878787	63879474	12q14.2
TC0100002797.oe.1	0.000924	up	3.02178	8.89114	8.98656	9.01093	9.11674	9.18824	10.1553	10.3297	11.7797	10.7689	10.137	lnc-GPR137B-3	LNCipedia Identified Transcript//NONCODE class 'Antisense,Exonic', Ensembl Cross Reference: ENST00000477559 Name: GPR137B	---	---	---	lnc-GPR137B-3:1	NonCoding	NONHSAT010399	---	---	---	chr1	+	236183778	236221865	1q42.3
TC0900001061.oe.1	0.0192056	up	3.011	11.7117	8.91476	9.07217	9.64033	10.0761	12.0964	10.9592	11.7884	11.4078	11.1144	lnc-NEK6-2	NONCODE class 'Antisense', PubMed Identifer: PMID:22140575 brain_Pred40630//NONCODE class 'Antisense', PubMed Identifer: PMID:22140575 mixed_Pred48800//LNCipedia Identified Transcript//uncharacterized LOC100129034 (LOC100129034), long non-coding RNA.//NONCODE class 'Antisense'	---	---	---	lnc-NEK6-2:1	NonCoding	NONHSAT134685//NONHSAT134684//NONHSAT134686	---	---	NR_027406	chr9	+	124353473	124359186	9q33.3
TC0X00000517.oe.1	0.000184	up	3.00917	5.02736	5.71669	6.02685	6.27372	5.78742	7.72416	6.95572	7.43803	7.25811	7.40283	lnc-NHSL2-2	LNCipedia Identified Transcript//NONCODE class 'Sense No Exonic'	---	---	---	lnc-NHSL2-2:1	NonCoding	NONHSAT137492	---	---	---	chrX	+	72150884	72153285	Xq13.1
TSUnmapped00001611.oe.1	0.0250793	up	3.00819	5.15268	5.04974	4.989	4.16977	4.85182	8.38526	5.80271	6.89842	5.4133	5.6578	lnc-LILRA4-1	LNCipedia Identified Transcript	---	---	---	lnc-LILRA4-1:5	NonCoding	---	---	---	---	---	---	---	---	---
TC0X00000026.oe.1	0.0141732	up	3.00469	9.72871	8.87594	9.79903	8.66296	10.3033	9.50709	11.5483	11.2294	11.1874	11.8338	lnc-RPS4Y1-11	LNCipedia Identified Transcript - Alternate transcript name(s): NR_003254//NONCODE class 'Exonic', Ensembl Cross Reference: ENST00000503018 Name: XG	---	---	---	lnc-RPS4Y1-11:2	NonCoding	NONHSAT136092	---	---	---	chrX	+	2752296	2774996	Xp22.33
TSUnmapped00001610.oe.1	0.0462225	up	3.0046	4.92809	4.93384	4.61584	4.30849	4.64145	8.67027	5.51051	6.7549	5.19103	5.23687	lnc-LILRA4-1	LNCipedia Identified Transcript	---	---	---	lnc-LILRA4-1:6	NonCoding	---	---	---	---	---	---	---	---	---
TC1100000449.oe.1	0.00898758	up	3.00426	9.92912	8.29347	9.28	9.47862	9.70075	12.3218	10.2808	10.9284	10.675	10.4111	lnc-EHF-7	LNCipedia Identified Transcript//NONCODE class 'Exonic', Ensembl Cross Reference: ENST00000528104 Name: CAT	---	---	---	lnc-EHF-7:1	NonCoding	NONHSAT018752	---	---	---	chr11	+	34456149	34456964	11p13
TC0400002517.oe.1	0.00596528	up	2.99938	11.144	9.13664	9.53185	9.63492	10.0744	10.5179	11.5152	11.9176	11.8567	11.6377	lnc-SLC10A7-8	LNCipedia Identified Transcript//NONCODE class 'Linc'	---	---	---	lnc-SLC10A7-8:1	NonCoding	NONHSAT098643	---	---	---	chr4	-	145759008	145760121	4q31.21
TC0300002484.oe.1	0.00276242	up	2.99893	5.74309	6.25417	5.8368	6.28709	5.63325	8.25528	7.66794	7.65383	6.21807	7.88153	lnc-ADAMTS9-4	NONCODE class 'Exonic', Ensembl Cross Reference: ENST00000477180 Name: ADAMTS9//LNCipedia Identified Transcript//NONCODE class 'Exonic', Ensembl Cross Reference: ENST00000467257 Name: ADAMTS9	---	---	---	lnc-ADAMTS9-4:1	NonCoding	NONHSAT090244//NONHSAT090243	---	---	---	chr3	-	64515657	64533286	3p14.1
TC0500001455.oe.1	0.0257868	up	2.99665	9.12928	7.34032	7.85404	8.08881	8.54892	8.01261	10.0914	10.36	10.8935	9.52061	lnc-ITK-7	LNCipedia Identified Transcript//NONCODE class 'Exonic'	---	---	---	lnc-ITK-7:1	NonCoding	NONHSAT104739	---	---	---	chr5	+	156760480	156762334	5q33.3
TC1800000351.oe.1	0.00092	up	2.9907	5.99093	4.8772	5.34737	4.74763	4.84229	6.8098	6.47148	7.49867	6.59171	6.33618	lnc-GALNT1-1//RP11-873E20.1//NONHSAG023691	LNCipedia Identified Transcript - Alternate transcript name(s): FPKM1_group_13828_transcript_2//LNCipedia Identified Transcript//NONCODE class 'Linc', External ID: TCONS_00018042 Name: RP11-873E20.1, Ensembl Cross Reference: ENST00000590983 Name: RP11-873E20.1//N/A//NONCODE class 'Linc', PubMed Identifer: PMID:23818866 FPKM1_group_13828_transcr	ENST00000590983.1//ENST00000590983	---	---	lnc-GALNT1-1:2//lnc-GALNT1-1:1	NonCoding	NONHSAT058943//NONHSAT058942	---	---	---	chr18	+	35714547	35718274	18q12.2
TC0500002898.oe.1	0.00652387	up	2.98809	5.88438	4.34494	4.64553	4.33051	5.16101	6.13647	5.56736	7.42688	6.84979	6.28199	lnc-TRPC7-6	LNCipedia Identified Transcript//NONCODE class 'Exonic', Ensembl Cross Reference: ENST00000508642 Name: SPOCK1	---	---	---	lnc-TRPC7-6:1	NonCoding	NONHSAT103971	---	---	---	chr5	-	136988553	136993160	5q31.2
TC1500001260.oe.1	0.00262856	up	2.98603	10.078	9.43279	9.84135	9.44699	10.3816	12.5914	11.2847	11.2972	10.6493	11.2492	lnc-FAM189A1-5	LNCipedia Identified Transcript//NONCODE class 'Exonic', Ensembl Cross Reference: ENST00000561307 Name: TJP1	---	---	---	lnc-FAM189A1-5:1	NonCoding	NONHSAT041302	---	---	---	chr15	-	29718893	29720128	15q13.1
TC1400001449.oe.1	0.0212636	up	2.98591	8.50915	7.31383	6.96504	6.59002	7.8739	8.31876	8.20687	10.5105	9.51875	8.58788	lnc-GNPNAT1-2	LNCipedia Identified Transcript//NONCODE class 'Exonic', Ensembl Cross Reference: ENST00000557178 Name: ERO1L	---	---	---	lnc-GNPNAT1-2:1	NonCoding	NONHSAT036893	---	---	---	chr14	-	52671574	52672235	14q22.1
TC0700001050.oe.1	0.00768715	up	2.98575	6.5914	6.11686	6.55917	6.15258	7.17187	7.13518	7.68089	8.83027	7.57627	9.25972	lnc-FAM185A-3	NONCODE class 'Antisense,Exonic', Ensembl Cross Reference: ENST00000485478 Name: LRRC17//LNCipedia Identified Transcript	---	---	---	lnc-FAM185A-3:1	NonCoding	NONHSAT122528	---	---	---	chr7	+	102936184	102944670	7q22.1
TC0X00001918.oe.1	0.00110323	up	2.98205	9.30878	9.14283	9.0139	8.65149	9.15863	11.1084	10.2112	11.4294	10.631	9.77724	lnc-DNASE1L1-3	NONCODE class 'Exonic', Ensembl Cross Reference: ENST00000465144 Name: FLNA//LNCipedia Identified Transcript	---	---	---	lnc-DNASE1L1-3:1	NonCoding	NONHSAT139151	---	---	---	chrX	-	154364632	154365207	Xq28
TC0100004481.oe.1	0.0107013	up	2.97853	12.2876	10.6554	10.5776	10.755	11.4513	11.446	12.8429	13.5053	13.117	12.6888	lnc-S100A11-2	LNCipedia Identified Transcript//NONCODE Identified Transcript, Ensembl Cross Reference: ENST00000478348 Name: S100A10//NONCODE Identified Transcript, Ensembl Cross Reference: ENST00000478574 Name: S100A10//NONCODE class 'Exonic'	---	---	---	lnc-S100A11-2:1	NonCoding	NONHSAT006453//NONHSAT006455//NONHSAT006454	---	---	---	chr1	-	151983167	151993829	1q21.3
TC1000000709.oe.1	0.000141	up	2.97166	7.27542	7.24809	7.34927	7.05698	8.01004	9.06503	8.41807	9.34931	8.77239	9.19136	RP11-354E23.4	N/A	ENST00000624201.1	---	---	---	NonCoding	---	---	---	---	chr10	+	72756398	72757016	10q22.1
TC0800002285.oe.1	0.000812	up	2.96862	4.05888	4.06489	3.90996	3.99209	4.32925	6.60266	4.99616	6.01224	5.28609	5.30689	lnc-ABRA-2	LNCipedia Identified Transcript//NONCODE class 'Exonic', Ensembl Cross Reference: ENST00000521950 Name: ANGPT1//NONCODE class 'Exonic', Ensembl Cross Reference: ENST00000518386 Name: ANGPT1//NONCODE class 'Exonic', Ensembl Cross Reference: ENST00000522400 Name: ANGPT1	---	---	---	lnc-ABRA-2:1	NonCoding	NONHSAT128259//NONHSAT128261//NONHSAT128262	---	---	---	chr8	-	107251527	107321993	8q23.1
TC1600001812.oe.1	6.3e-05	up	2.96843	8.49963	7.84636	8.25864	7.80508	8.38437	9.28922	9.59631	10.1992	9.86863	9.68926	lnc-C16orf88-4	LNCipedia Identified Transcript//NONCODE class 'Exonic', Ensembl Cross Reference: ENST00000563645 Name: GDE1	---	---	---	lnc-C16orf88-4:1	NonCoding	NONHSAT140892	---	---	---	chr16	-	19503101	19505132	16p12.3
TC1600000332.oe.1	8.84e-05	up	2.96725	6.99213	6.03832	6.45238	6.81542	6.85029	8.08679	8.19029	8.45956	7.77393	8.4836	CTB-193M12.5	N/A	ENST00000624682.1	---	---	---	NonCoding	---	---	---	---	chr16	+	15701237	15702118	16p13.11
TC1200002785.oe.1	0.00119833	up	2.96515	10.6153	9.54772	10.1958	9.577	9.76753	11.9619	12.0899	11.4373	10.7094	11.3453	lnc-SYCP3-4	LNCipedia Identified Transcript//NONCODE class 'Exonic', Ensembl Cross Reference: ENST00000552009 Name: GNPTAB	---	---	---	lnc-SYCP3-4:1	NonCoding	NONHSAT030298	---	---	---	chr12	-	101765761	101768103	12q23.2
TC0X00001916.oe.1	0.000271	up	2.9588	9.71869	9.3427	9.7619	9.51574	10.127	11.5154	10.9413	11.9433	11.1816	10.7094	lnc-DNASE1L1-5	LNCipedia Identified Transcript//NONCODE class 'Exonic', Ensembl Cross Reference: ENST00000498411 Name: FLNA	---	---	---	lnc-DNASE1L1-5:1	NonCoding	NONHSAT139148	---	---	---	chrX	-	154348530	154352883	Xq28
TC0500002199.oe.1	0.000252	up	2.9582	4.79781	4.8721	5.05541	4.70715	5.41554	6.91987	6.11895	7.04439	5.93903	6.64936	lnc-ARL15-4//CTD-2081C10.7	LNCipedia Identified Transcript//N/A	ENST00000606482//ENST00000606482.1	---	---	lnc-ARL15-4:1	NonCoding	---	---	---	---	chr5	-	53880293	53881051	5q11.2
TC0900002211.oe.1	0.00433388	up	2.9509	4.77149	4.59561	3.99618	4.45156	4.86654	7.38857	5.71748	6.35	5.25974	5.77139	lnc-TNFSF8-1	NONCODE class 'Exonic', Ensembl Cross Reference: ENST00000474301 Name: TNFSF8//LNCipedia Identified Transcript	---	---	---	lnc-TNFSF8-1:1	NonCoding	NONHSAT134405	---	---	---	chr9	-	114893723	114904308	9q32
TC1000001165.oe.1	0.00215569	up	2.94753	8.6068	6.88102	8.48039	7.71746	8.23806	9.6784	9.11793	10.0285	9.55666	9.33977	lnc-MXI1-2	LNCipedia Identified Transcript//NONCODE class 'Exonic', Ensembl Cross Reference: ENST00000488104 Name: ADD3	---	---	---	lnc-MXI1-2:1	NonCoding	NONHSAT016334	---	---	---	chr10	+	110119315	110119690	10q25.2
TC1400000857.oe.1	0.0195307	up	2.9399	5.67371	5.33029	5.78116	6.35881	6.15865	9.34611	7.03183	7.30866	6.44029	6.95454	lnc-IFI27L1-2	NONCODE class 'Exonic', Ensembl Cross Reference: ENST00000555121 Name: IFI27//NONCODE class 'Exonic'//NONCODE class 'Exonic', PubMed Identifer: PMID:22140575 brain_Pred11962//LNCipedia Identified Transcript//NONCODE class 'Exonic', Ensembl Cross Reference: ENST00000555081 Name: IFI27//NONCODE class 'Exonic', PubMed Identifer: PMID:22140575 brain_Pred11965//NONCODE class 'Exonic', Ensembl Cross Re…	---	---	---	lnc-IFI27L1-2:2	NonCoding	NONHSAT039382//NONHSAT039381//NONHSAT039379//NONHSAT039387//NONHSAT039383//NONHSAT039385//NONHSAT039380	---	---	---	chr14	+	94110733	94116690	14q32.12
TSUnmapped00000245.oe.1	0.00673667	up	2.93928	4.94122	4.63591	5.32713	4.87125	4.83844	5.70082	5.46403	7.71476	6.99147	6.52018	lnc-CRYBA4-2	LNCipedia Identified Transcript	---	---	---	lnc-CRYBA4-2:1	NonCoding	---	---	---	---	---	---	---	---	---
TC1200001822.oe.1	0.00170458	up	2.93899	7.08595	7.39015	7.17657	6.96429	7.35759	9.00545	7.61461	9.62965	8.80568	8.69575	lnc-CLEC4C-2	NONCODE class 'Exonic', Ensembl Cross Reference: ENST00000539738 Name: SLC2A14//LNCipedia Identified Transcript	---	---	---	lnc-CLEC4C-2:1	NonCoding	NONHSAT026268	---	---	---	chr12	-	7831264	7832765	12p13.31
TC1600002324.oe.1	0.00388377	up	2.93573	10.218	7.98375	8.58478	9.3693	9.29684	10.3797	10.7465	10.8159	10.5465	10.7327	lnc-KIAA0895L-1	LNCipedia Identified Transcript//NONCODE class 'Antisense,Exonic', Ensembl Cross Reference: ENST00000562514 Name: KIAA0895L	---	---	---	lnc-KIAA0895L-1:1	NonCoding	NONHSAT143092	---	---	---	chr16	-	67175602	67176455	16q22.1
TC1200000524.oe.1	0.00660382	up	2.93135	7.65535	6.85058	6.29457	6.17699	7.75406	8.11913	7.94363	9.27099	8.13347	9.02216	RP11-139E19.3	N/A	ENST00000619826.1	---	---	---	NonCoding	---	---	---	---	chr12	+	45256473	45256726	12q12
TSUnmapped00001233.oe.1	0.00230221	up	2.92389	7.32767	6.00996	6.11338	6.24789	6.24995	8.9146	7.65674	7.65382	7.46509	7.99803	LINC01296	LNCipedia Identified Transcript	---	---	---	LINC01296:14	NonCoding	---	---	---	---	---	---	---	---	---
TC0800002446.oe.1	0.0181937	up	2.91447	8.42875	7.78177	8.31172	8.06061	8.62393	11.2918	9.92208	10.2656	8.38196	9.06147	lnc-GSDMC-5	NONCODE class 'Exonic', Ensembl Cross Reference: ENST00000520887 Name: FAM49B//LNCipedia Identified Transcript	---	---	---	lnc-GSDMC-5:8	NonCoding	NONHSAT129134	---	---	---	chr8	-	129842080	129847317	8q24.21
TC1900002385.oe.1	0.00352905	up	2.91159	8.76065	7.9984	8.11423	7.59757	8.58404	9.17963	9.81494	10.9145	9.21683	9.63797	lnc-CADM4-1	LNCipedia Identified Transcript//NONCODE class 'Sense No Exonic', Ensembl Cross Reference: ENST00000473384 Name: RN7SL368P	---	---	---	lnc-CADM4-1:1	NonCoding	NONHSAT066617	---	---	---	chr19	-	43660500	43660776	19q13.31
TC0800002022.oe.1	0.0100152	up	2.90942	4.5522	4.50109	4.60789	4.48732	4.76144	7.68619	5.81088	6.47668	4.99259	5.64723	lnc-ZNF704-5	NONCODE class 'Exonic', Ensembl Cross Reference: ENST00000522811 Name: PAG1//LNCipedia Identified Transcript	---	---	---	lnc-ZNF704-5:1	NonCoding	NONHSAT127435	---	---	---	chr8	-	80985228	80987534	8q21.13
TC0200001117.oe.1	0.00086	up	2.90648	6.26119	6.49701	7.13227	6.23426	6.88384	7.91081	7.74616	9.07619	7.87963	8.09215	lnc-AC005035.1-1	LNCipedia Identified Transcript//NONCODE class 'Exonic', Ensembl Cross Reference: ENST00000491743 Name: MAP4K4	---	---	---	lnc-AC005035.1-1:1	NonCoding	NONHSAT072835	---	---	---	chr2	+	101867856	101870085	2q11.2
TC0X00000369.oe.1	0.0248722	up	2.90292	9.96644	8.51721	8.39954	8.07767	7.99448	8.54614	10.2299	11.0209	10.1127	10.7332	lnc-RP11-363G10.2.1-1	LNCipedia Identified Transcript//NONCODE class 'Exonic', Ensembl Cross Reference: ENST00000497416 Name: MAGED4	---	---	---	lnc-RP11-363G10.2.1-1:1	NonCoding	NONHSAT137071	---	---	---	chrX	+	52190018	52192256	Xp11.22
TC0500000336.oe.1	0.000795	up	2.89815	7.25281	6.38108	6.4484	6.19149	7.09444	7.71442	7.93378	8.62962	8.76079	8.00527	lnc-TTC23L-1	LNCipedia Identified Transcript//NONCODE class 'Exonic', Ensembl Cross Reference: ENST00000507883 Name: RAI14	---	---	---	lnc-TTC23L-1:1	NonCoding	NONHSAT100995	---	---	---	chr5	+	34826004	34830918	5p13.2
TC1400000011.oe.1	0.000503	up	2.89665	7.58545	6.81899	6.67377	6.56065	6.78806	9.22055	8.27719	8.26327	8.04817	8.28967	lnc-POTEG-4	NONCODE class 'Linc', External ID: TCONS_00010317 Name: AL589743.1, Ensembl Cross Reference: ENST00000412017 Name: AL589743.1//double homeobox A pseudogene 10 [Source:HGNC Symbol;Acc:HGNC:32189]//NONCODE class 'Linc', External ID: TCONS_00010326 Name: AL589743.1, Ensembl Cross Reference: ENST00000548271 Name: AL589743.1//LNCipedia Identified Transcript - Alternate transcript name(s): AL589743.1-0…	ENST00000549484//ENST00000547220	---	---	lnc-POTEG-4:1	NonCoding	NONHSAT035477//NONHSAT035483//NONHSAT035473//NONHSAT035471//NONHSAT035489//NONHSAT035490//NONHSAT035476//NONHSAT035485//NONHSAT035478//NONHSAT035481//NONHSAT035484//NONHSAT035472//NONHSAT035479	---	---	---	chr14	+	19062358	19130873	14q11.2
TC0900001864.oe.1	1.65e-05	up	2.89459	10.7594	10.4042	10.6655	9.98019	10.5923	12.2053	12.0351	12.2065	11.6988	11.9228	lnc-GNA14-3	LNCipedia Identified Transcript//NONCODE class 'Exonic', PubMed Identifer: PMID:22140575 brain_Pred40124	---	---	---	lnc-GNA14-3:1	NonCoding	NONHSAT131984	---	---	---	chr9	-	77716723	77720497	9q21.2
TC0300003142.oe.1	0.0195245	up	2.89061	10.9948	11.2688	10.5279	10.0149	12.2118	11.5614	12.9939	13.6215	11.8658	12.6325	lnc-TRIM59-2	NONCODE class 'Sense No Exonic', PubMed Identifer: PMID:22140575 mixed_Pred36868 Name: SCARNA7, PubMed Identifer: PMID:22140575 brain_Pred30981 Name: SCARNA7, Ensembl Cross Reference: ENST00000458797 Name: SCARNA7//LNCipedia Identified Transcript//small Cajal body-specific RNA 7 (SCARNA7), guide RNA.	---	---	---	lnc-TRIM59-2:1	NonCoding	NONHSAT092997	---	---	NR_003001	chr3	-	160514907	160515236	3q25.33
TC0X00001586.oe.1	0.000191	up	2.89051	7.81159	7.41672	7.09941	6.83474	7.31256	9.05278	9.23081	9.00208	8.3485	8.49747	lnc-PCDH19-3	LNCipedia Identified Transcript//NONCODE class 'Linc'	---	---	---	lnc-PCDH19-3:1	NonCoding	NONHSAT137887	---	---	---	chrX	-	99938208	99938520	Xq22.1
TC0900002039.oe.1	0.0037036	up	2.89042	6.44532	7.91668	7.98037	7.26073	7.91965	8.20202	8.81633	9.39111	9.36021	9.40946	lnc-ZNF367-2	NONCODE class 'Exonic', Ensembl Cross Reference: ENST00000481149 Name: CDC14B//LNCipedia Identified Transcript	---	---	---	lnc-ZNF367-2:1	NonCoding	NONHSAT133433	---	---	---	chr9	-	96514503	96522603	9q22.33
TC1300001092.oe.1	0.0025401	up	2.88686	4.14632	4.72108	4.58924	3.74547	4.6645	6.09238	6.12459	5.96179	4.77107	6.56427	lnc-SOHLH2-3	LNCipedia Identified Transcript//NONCODE class 'Exonic', PubMed Identifer: PMID:22140575 mixed_Pred12947 , PubMed Identifer: PMID:22140575 brain_Pred10653	---	---	---	lnc-SOHLH2-3:1	NonCoding	NONHSAT033188	---	---	---	chr13	-	35845901	35847623	13q13.3
TSUnmapped00000615.oe.1	0.00230954	up	2.88419	4.64827	4.16093	3.79062	4.43442	4.16748	6.99142	5.40585	5.42561	5.26055	5.75912	LINC01296	LNCipedia Identified Transcript	---	---	---	LINC01296:27	NonCoding	---	---	---	---	---	---	---	---	---
TC0X00000958.oe.1	0.0014941	up	2.88133	14.6121	14.4586	14.3557	14.3029	14.6599	16.5749	15.5337	16.951	15.4488	15.5145	lnc-FMR1NB-3	NONCODE class 'Linc', Ensembl Cross Reference: ENST00000498161 Name: FTH1P8//LNCipedia Identified Transcript	---	---	---	lnc-FMR1NB-3:1	NonCoding	NONHSAT138916	---	---	---	chrX	+	148052233	148052746	Xq28
TC0400000283.oe.1	0.000392	up	2.8737	11.8538	11.4821	11.7614	11.3489	11.8317	13.6045	12.6285	13.8309	13.1497	12.679	lnc-RBPJ-2	LNCipedia Identified Transcript//NONCODE class 'Exonic', PubMed Identifer: PMID:22140575 mixed_Pred37654 , PubMed Identifer: PMID:22140575 brain_Pred31671//NONCODE class 'Exonic'	---	---	---	lnc-RBPJ-2:1	NonCoding	NONHSAT095875//NONHSAT095876	---	---	---	chr4	+	26432993	26434919	4p15.2
TC1700000139.oe.1	0.00516122	up	2.8729	8.25263	8.46147	9.42775	9.78759	9.03147	11.4706	10.1067	10.6775	10.4606	9.85804	lnc-FBXO39-1	NONCODE class 'Exonic', Ensembl Cross Reference: ENST00000573518 Name: XAF1//LNCipedia Identified Transcript	---	---	---	lnc-FBXO39-1:1	NonCoding	NONHSAT145291	---	---	---	chr17	+	6761718	6770780	17p13.1
TSUnmapped00001381.oe.1	0.000509	up	2.86915	8.89285	7.70396	7.89319	7.77919	8.3469	10.2093	9.7159	9.55826	9.36202	9.37375	lnc-POTEG-4	LNCipedia Identified Transcript	---	---	---	lnc-POTEG-4:7	NonCoding	---	---	---	---	---	---	---	---	---
TC0500002294.oe.1	0.0378695	up	2.86339	4.18229	4.15498	4.03016	4.56593	4.13263	8.02232	4.79089	5.83594	4.78893	5.21653	lnc-SGTB-7	LNCipedia Identified Transcript//NONCODE class 'Exonic', Ensembl Cross Reference: ENST00000515027 Name: CD180	---	---	---	lnc-SGTB-7:1	NonCoding	NONHSAT101806	---	---	---	chr5	-	67184522	67186297	5q12.3
TC1500001649.oe.1	0.000617	up	2.85926	6.98805	6.93232	7.01542	7.30956	7.67842	9.29127	7.9887	9.01451	8.29557	8.91194	lnc-SLTM-8	LNCipedia Identified Transcript//NONCODE class 'Exonic'	---	---	---	lnc-SLTM-8:1	NonCoding	NONHSAT044159	---	---	---	chr15	-	59227514	59236687	15q22.2
TSUnmapped00002034.oe.1	0.0333754	up	2.85793	6.30494	6.09833	6.75145	6.34253	6.38205	10.0033	7.21675	8.27918	6.88935	7.06561	lnc-LILRA3-1	LNCipedia Identified Transcript	---	---	---	lnc-LILRA3-1:3	NonCoding	---	---	---	---	---	---	---	---	---
TC0200004361.oe.1	3.87e-05	up	2.85454	5.64327	5.76431	5.85515	5.54128	5.85117	6.9523	7.12648	7.2516	6.97808	7.913	lnc-CHRNA1-5	NONCODE class 'Exonic', Ensembl Cross Reference: ENST00000491801 Name: CHN1//LNCipedia Identified Transcript//NONCODE class 'Exonic', Ensembl Cross Reference: ENST00000481174 Name: CHN1//NONCODE class 'Exonic', Ensembl Cross Reference: ENST00000485882 Name: CHN1//NONCODE class 'Exonic', Ensembl Cross Reference: ENST00000469597 Name: CHN1	---	---	---	lnc-CHRNA1-5:1	NonCoding	NONHSAT075587//NONHSAT075588//NONHSAT075585//NONHSAT075586	---	---	---	chr2	-	174810900	175005219	2q31.1
TC0900000658.oe.1	0.0397367	up	2.85319	4.31889	4.07423	4.96003	4.22593	5.40905	8.27709	5.3438	6.14895	5.34815	5.43302	lnc-CTSL1-7	LNCipedia Identified Transcript//NONCODE class 'Exonic', Ensembl Cross Reference: ENST00000475804 Name: DAPK1	---	---	---	lnc-CTSL1-7:1	NonCoding	NONHSAT132863	---	---	---	chr9	+	87648575	87651590	9q21.33
TC0900002330.oe.1	0.000304	up	2.84751	8.63568	7.36125	7.82869	7.70679	8.02458	9.89821	9.45666	9.39548	9.12431	9.23085	lnc-SH2D3C-1	LNCipedia Identified Transcript//NONCODE class 'Exonic'	---	---	---	lnc-SH2D3C-1:1	NonCoding	NONHSAT134849	---	---	---	chr9	-	127815020	127815295	9q34.11
TC0X00001278.oe.1	0.0184641	up	2.84611	7.58175	6.08346	7.13449	6.51032	7.78849	7.18421	8.54241	9.5508	8.30777	9.05829	MIR222HG//XLOC_008149//lnc-CXorf36-1//NONHSAG054345	MIR222 host gene (non-protein coding) [Source:HGNC Symbol;Acc:HGNC:49555]//LNCipedia Identified Transcript//gene_id XLOC_008149; transcript_id TCONS_00017313; oId TCONS_00014891; linc_name linc-CXorf36-1; tss_id TSS12999; class_code .; gene_name linc-CXorf36-1;//NONCODE class 'Linc', External ID: TCONS_00040134 Name: RP6-99M1.2, Ensembl Cross Reference: ENST00000602507 Name: RP6-99M1.2	ENST00000602507.1//ENST00000602461.1//ENST00000602507	---	---	lnc-CXorf36-1:1//lnc-CXorf36-1:6	NonCoding	NONHSAT136809	TCONS_00017313	---	---	chrX	-	45745211	45770274	Xp11.3
TC1700000894.oe.1	0.00684861	up	2.84411	4.68633	4.7703	4.78065	4.61273	4.57941	7.6161	5.72129	6.55545	5.86544	5.21103	lnc-HEXIM2-5	LNCipedia Identified Transcript//NONCODE class 'Exonic', Ensembl Cross Reference: ENST00000591434 Name: FMNL1	---	---	---	lnc-HEXIM2-5:1	NonCoding	NONHSAT054041	---	---	---	chr17	+	45234080	45236594	17q21.31
TC0100002025.oe.1	0.0143672	up	2.84355	8.6073	6.10136	7.06094	7.07658	7.8267	7.88933	9.00218	9.08549	9.22039	9.01395	lnc-GORAB-1//RP1-79C4.4	LNCipedia Identified Transcript//N/A	ENST00000606154.1//ENST00000606154	---	---	lnc-GORAB-1:1	NonCoding	---	---	---	---	chr1	+	170667381	170669425	1q24.2
TC0400002398.oe.1	0.000569	up	2.84003	5.43479	5.87031	5.85316	5.74299	6.38506	7.59566	6.74596	6.92077	7.61468	7.93877	lnc-MFSD8-4	NONCODE class 'Linc', External ID: TCONS_00029655//LNCipedia Identified Transcript//NONCODE class 'Linc', External ID: TCONS_00029656//gene_id XLOC_004067; transcript_id TCONS_00008571; oId TCONS_00010721; linc_name linc-ANKRD50-5; tss_id TSS6525; class_code .; gene_name linc-ANKRD50-5;//gene_id XLOC_004067; transcript_id TCONS_00008572; oId TCONS_00010722; linc_name linc-ANKRD50-5; tss_id TSS652…	---	---	---	lnc-MFSD8-4:1	NonCoding	NONHSAT098229//NONHSAT098230	TCONS_00008572//TCONS_00008571	---	---	chr4	-	127094431	127096723	4q28.1
TC0900001627.oe.1	0.000434	up	2.83779	13.309	13.3923	12.9939	13.4638	14.1428	14.7433	14.9789	15.5049	14.4334	15.1651	RNase_MRP//lnc-C9orf100-1//RMRP//NONHSAG052119	NONCODE class 'Linc', PubMed Identifer: PMID:22140575 mixed_Pred47909 Name: RMRP, PubMed Identifer: PMID:22140575 brain_Pred39943 Name: RMRP, PubMed Identifer: PMID:23040067 HI-LNC760 Name: RMRP, Ensembl Cross Reference: ENST00000602361 Name: RMRP, Ensembl Cross Reference: ENST00000363046 Name: RMRP//RNA component of mitochondrial RNA processing endoribonuclease [Source:HGNC Symbol;Acc:HGNC:10031…	ENST00000602361//ENST00000363046//ENST00000602361.1	---	---	lnc-C9orf100-1:1//lnc-C9orf100-1:2	NonCoding	NONHSAT130962	---	---	NR_003051	chr9	-	35657751	35658018	9p13.3
TC0X00001917.oe.1	0.000998	up	2.83646	10.3139	9.70342	9.82007	9.40775	10.4069	11.6158	10.9314	12.1672	11.513	10.9451	lnc-DNASE1L1-4	NONCODE class 'Exonic', Ensembl Cross Reference: ENST00000466319 Name: FLNA//LNCipedia Identified Transcript	---	---	---	lnc-DNASE1L1-4:1	NonCoding	NONHSAT139150	---	---	---	chrX	-	154357541	154358664	Xq28
TC0X00000137.oe.1	0.00146226	up	2.83596	11.6183	10.1496	10.193	10.2008	10.5709	12.5604	12.0053	12.1825	11.7123	11.7912	lnc-SAT1-1	NONCODE class 'Exonic', Ensembl Cross Reference: ENST00000487713 Name: SAT1//NONCODE class 'Exonic', PubMed Identifer: PMID:22140575 mixed_Pred50034//NONCODE class 'Exonic'//spermidine/spermine N1-acetyltransferase 1 (SAT1), transcript variant 2, non-coding RNA.//NONCODE class 'Exonic', Ensembl Cross Reference: ENST00000462639 Name: SAT1//LNCipedia Identified Transcript//NONCODE class 'Exonic', E…	---	---	---	lnc-SAT1-1:1	NonCoding	NONHSAT136496//NONHSAT136495//NONHSAT136494//NONHSAT136497//NONHSAT136498	---	---	NR_027783	chrX	+	23783158	23786210	Xp22.11
TC2200000249.oe.1	0.0102025	up	2.8341	7.41638	6.12652	5.43789	6.66029	7.10939	7.14465	8.2748	8.80672	8.25216	7.7866	lnc-GGT1-5	LNCipedia Identified Transcript//NONCODE class 'Linc', Ensembl Cross Reference: ENST00000442565 Name: CRIP1P4//NONCODE class 'Linc', Ensembl Cross Reference: ENST00000330974 Name: CRIP1P4	---	---	---	lnc-GGT1-5:1	NonCoding	NONHSAT084380//NONHSAT084381	---	---	---	chr22	+	24712292	24712522	22q11.23
TC1400001933.oe.1	0.022497	up	2.82866	8.46085	6.07537	6.95978	7.15244	7.35576	10.1003	8.0193	8.68319	8.51401	8.188	lnc-DICER1-5	NONCODE class 'Exonic', Ensembl Cross Reference: ENST00000557215 Name: CLMN//NONCODE class 'Exonic', Ensembl Cross Reference: ENST00000556416 Name: CLMN//NONCODE class 'Exonic', Ensembl Cross Reference: ENST00000557696 Name: CLMN//LNCipedia Identified Transcript	---	---	---	lnc-DICER1-5:1	NonCoding	NONHSAT039432//NONHSAT039431//NONHSAT039433	---	---	---	chr14	-	95191527	95196584	14q32.13
TC0900000520.oe.1	0.0394233	up	2.82732	7.68891	6.07947	7.16435	6.46624	8.49512	7.16059	8.80185	9.18282	9.74048	8.50553	lnc-SMC5-7	LNCipedia Identified Transcript//NONCODE class 'Exonic', Ensembl Cross Reference: ENST00000460688 Name: MAMDC2	---	---	---	lnc-SMC5-7:1	NonCoding	NONHSAT131801	---	---	---	chr9	+	70168615	70170782	9q21.12
TC0700001288.oe.1	0.0016324	up	2.80914	4.6634	4.60254	5.18084	4.90485	4.83852	7.38317	5.81398	6.00735	5.8081	6.62821	NONHSAG048811//RP11-2E11.9//lnc-MEST-2	NONCODE class 'Antisense', Ensembl Cross Reference: ENST00000604965 Name: RP11-2E11.9//LNCipedia Identified Transcript//N/A	ENST00000604965.1//ENST00000604965	---	---	lnc-MEST-2:1	NonCoding	NONHSAT123356	---	---	---	chr7	+	130507660	130508282	7q32.2
TC0900000819.oe.1	0.0274697	up	2.80765	9.85889	7.68976	7.30469	7.88636	8.16657	8.78423	10.5141	9.94727	10.1085	8.999	lnc-TGFBR1-2	LNCipedia Identified Transcript//NONCODE class 'Exonic', Ensembl Cross Reference: ENST00000496686 Name: COL15A1	---	---	---	lnc-TGFBR1-2:1	NonCoding	NONHSAT133632	---	---	---	chr9	+	99038673	99041377	9q22.33
TC0200004097.oe.1	0.00149095	up	2.80649	7.81615	6.90354	7.53116	7.19388	7.28546	9.42924	8.21678	9.55447	8.41101	8.56254	lnc-ZEB2-8	LNCipedia Identified Transcript//NONCODE class 'Exonic', Ensembl Cross Reference: ENST00000467352 Name: GTDC1	---	---	---	lnc-ZEB2-8:1	NonCoding	NONHSAT074756	---	---	---	chr2	-	144210835	144319870	2q22.3
TC0500002244.oe.1	0.00369075	up	2.7994	4.45548	4.47855	4.70054	4.40551	4.24266	6.92234	5.61389	6.28185	4.77258	6.11765	lnc-CTD-2117L12.1.1-4	NONCODE class 'Exonic', Ensembl Cross Reference: ENST00000502671 Name: PLK2//NONCODE class 'Exonic', Ensembl Cross Reference: ENST00000509555 Name: PLK2//NONCODE class 'Exonic', Ensembl Cross Reference: ENST00000510629 Name: PLK2//LNCipedia Identified Transcript//NONCODE class 'Exonic', Ensembl Cross Reference: ENST00000503713 Name: PLK2//NONCODE class 'Exonic', Ensembl Cross Reference: ENST00000…	---	---	---	lnc-CTD-2117L12.1.1-4:1	NonCoding	NONHSAT101609//NONHSAT101607//NONHSAT101605//NONHSAT101603//NONHSAT101606//NONHSAT101608	---	---	---	chr5	-	58453985	58460086	5q11.2
TC1900002386.oe.1	0.00231617	up	2.79716	8.56411	6.91298	7.87421	7.50365	8.08643	9.41577	8.9649	9.60682	9.6858	8.6879	lnc-KCNN4-4	NONCODE class 'Exonic', Ensembl Cross Reference: ENST00000594081 Name: SMG9//LNCipedia Identified Transcript//NONCODE class 'Exonic', Ensembl Cross Reference: ENST00000598860 Name: SMG9	---	---	---	lnc-KCNN4-4:1	NonCoding	NONHSAT066622//NONHSAT066623	---	---	---	chr19	-	43733344	43734825	19q13.31
TC1900001137.oe.1	0.00153971	up	2.79376	6.22263	6.36884	6.33527	6.04084	6.12341	7.57625	7.42946	8.91028	7.40902	7.17701	lnc-FTL-2	NONCODE Identified Transcript//LNCipedia Identified Transcript//NONCODE class 'Exonic'	---	---	---	lnc-FTL-2:2	NonCoding	NONHSAT067130//NONHSAT067131	---	---	---	chr19	+	48955667	48961011	19q13.33
TC0200004466.oe.1	0.0467215	up	2.79327	9.73815	7.22193	7.70665	7.99382	8.5725	8.01958	9.59128	10.3542	10.6083	10.0695	lnc-DIRC1-3	LNCipedia Identified Transcript//NONCODE class 'Exonic', Ensembl Cross Reference: ENST00000470524 Name: COL5A2	---	---	---	lnc-DIRC1-3:1	NonCoding	NONHSAT076046	---	---	---	chr2	-	189056766	189063038	2q32.2
TC0700001735.oe.1	0.000352	up	2.78723	5.99224	5.53918	5.20934	4.98064	6.0645	7.03153	6.65593	7.4272	7.18809	6.8773	lnc-CYTH3-1	LNCipedia Identified Transcript//NONCODE class 'Exonic', Ensembl Cross Reference: ENST00000482460 Name: CYTH3	---	---	---	lnc-CYTH3-1:1	NonCoding	NONHSAT118990	---	---	---	chr7	-	6187064	6272644	7p22.1
TC1300000958.oe.1	0.00107784	up	2.78496	10.2355	9.43905	9.27109	9.36603	9.57614	10.2796	10.948	11.6964	11.4167	10.9355	lnc-AL136219.1-7	NONCODE class 'Exonic', Ensembl Cross Reference: ENST00000464055 Name: ZDHHC20//NONCODE class 'Exonic', Ensembl Cross Reference: ENST00000494731 Name: ZDHHC20//LNCipedia Identified Transcript//NONCODE class 'Exonic', Ensembl Cross Reference: ENST00000484277 Name: ZDHHC20//NONCODE class 'Exonic', Ensembl Cross Reference: ENST00000477811 Name: ZDHHC20	---	---	---	lnc-AL136219.1-7:1	NonCoding	NONHSAT032381//NONHSAT032380//NONHSAT032382//NONHSAT032387	---	---	---	chr13	-	21376347	21421107	13q12.11
TSUnmapped00000120.oe.1	0.00443081	up	2.77922	6.93523	5.94322	6.0029	6.2709	6.5604	9.10709	7.56785	7.68272	7.3569	7.37147	lnc-POTEG-4	LNCipedia Identified Transcript	---	---	---	lnc-POTEG-4:17	NonCoding	---	---	---	---	---	---	---	---	---
TC0100004349.oe.1	0.00379857	up	2.77282	7.50857	7.88805	7.34478	6.53726	6.84548	8.70524	8.55622	9.58581	8.77412	7.85952	lnc-FCGR1B-7//NONHSAG002615	NONCODE class 'Linc', External ID: TCONS_00001936//LNCipedia Identified Transcript	---	---	---	lnc-FCGR1B-7:1	NonCoding	NONHSAT005607	---	---	---	chr1	-	121389265	121395862	1p11.2
TC0400001205.oe.1	0.00328446	up	2.77127	8.28427	7.51042	8.19664	8.33596	8.60623	10.2596	9.13125	10.5329	9.24171	9.12085	lnc-TDO2-4	LNCipedia Identified Transcript//NONCODE class 'Linc', Ensembl Cross Reference: ENST00000512179 Name: FTH1P21	---	---	---	lnc-TDO2-4:1	NonCoding	NONHSAT098939	---	---	---	chr4	+	156006478	156006988	4q32.1
TC0100002294.oe.1	0.0265087	up	2.76708	6.19611	6.00267	5.76743	5.00033	5.87822	9.15305	6.89166	7.11076	6.2251	6.80602	lnc-NEK7-3	LNCipedia Identified Transcript//NONCODE class 'Exonic', Ensembl Cross Reference: ENST00000491302 Name: PTPRC	---	---	---	lnc-NEK7-3:1	NonCoding	NONHSAT008651	---	---	---	chr1	+	198712790	198718299	1q32.1
TC2000000476.oe.1	0.000725	up	2.76444	11.6985	10.321	10.8134	10.8269	11.28	12.152	12.5028	12.9629	12.4942	12.163	lnc-CTSA-1	LNCipedia Identified Transcript//NONCODE class 'Antisense,Exonic', Ensembl Cross Reference: ENST00000484855 Name: CTSA	---	---	---	lnc-CTSA-1:1	NonCoding	NONHSAT079990	---	---	---	chr20	+	45897781	45898820	20q13.12
TC1600002438.oe.1	0.00942911	up	2.76016	12.3552	10.3892	10.3945	10.0659	10.9815	12.48	12.5067	12.5927	11.8625	12.0683	AC002044.4	N/A	ENST00000606707.1	---	---	---	NonCoding	---	---	---	---	chr16	-	73014319	73014476	16q22.3
TC2200000009.oe.1	0.00239196	up	2.75958	7.73017	6.84952	7.02962	6.75783	6.98538	9.64064	8.05681	8.42923	8.10004	8.44805	NONHSAG033142//DUXAP8//lnc-AP000525.1-3	NONCODE class 'Linc', Ensembl Cross Reference: ENST00000437781 Name: AP000525.9//NONCODE class 'Linc', Ensembl Cross Reference: ENST00000458623 Name: AP000525.9//NONCODE class 'Linc', Ensembl Cross Reference: ENST00000413768 Name: AP000525.9//NONCODE class 'Linc', Ensembl Cross Reference: ENST00000447898 Name: AP000525.9//NONCODE class 'Linc'//NONCODE class 'Linc', Ensembl Cross Reference: ENST00…	ENST00000383038//ENST00000383038.6//ENST00000437781//ENST00000413768.4//ENST00000458623.1//ENST00000458623//ENST00000437781.4//ENST00000413768//ENST00000607933.1//ENST00000607933//ENST00000447898.4//ENST00000447898	---	---	lnc-AP000525.1-3:5//lnc-AP000525.1-3:2//lnc-AP000525.1-3:1//lnc-AP000525.1-3:3//lnc-AP000525.1-3:6//lnc-AP000525.1-3:4//lnc-AP000525.1-3:7	NonCoding	NONHSAT083092//NONHSAT083084//NONHSAT083090//NONHSAT083085//NONHSAT083087//NONHSAT083086	---	---	---	chr22	+	15784959	15829984	22q11.1
TC0200004232.oe.1	0.0226087	up	2.75878	4.81763	4.71741	6.09898	4.80342	6.80247	6.23975	7.48595	7.74083	6.3691	6.72444	lnc-GCG-3	LNCipedia Identified Transcript//NONCODE class 'Exonic', Ensembl Cross Reference: ENST00000461836 Name: DPP4	---	---	---	lnc-GCG-3:1	NonCoding	NONHSAT075191	---	---	---	chr2	-	162038374	162073463	2q24.2
TC0300001776.oe.1	0.0196012	up	2.75613	10.4151	9.05226	8.55628	8.98239	9.70909	11.9772	11.2058	10.1735	9.80506	10.8669	lnc-HES1-10	LNCipedia Identified Transcript//NONCODE class 'Exonic'	---	---	---	lnc-HES1-10:1	NonCoding	NONHSAT094119	---	---	---	chr3	+	194686320	194686712	3q29
TC2200000455.oe.1	0.00876917	up	2.75351	5.33809	5.22895	5.34896	4.60149	5.24542	7.97996	5.83562	7.00602	6.35076	5.8969	lnc-KCTD17-5	LNCipedia Identified Transcript//NONCODE class 'Exonic', Ensembl Cross Reference: ENST00000447919 Name: CYTH4	---	---	---	lnc-KCTD17-5:1	NonCoding	NONHSAT085158	---	---	---	chr22	+	37300882	37303295	22q13.1
TSUnmapped00000194.oe.1	0.0011503	up	2.75249	4.66624	4.26373	3.90663	3.66546	4.14988	6.48645	5.63945	5.4867	5.07738	5.26565	LINC01296	LNCipedia Identified Transcript	---	---	---	LINC01296:25	NonCoding	---	---	---	---	---	---	---	---	---
TC0100002408.oe.1	0.0194663	up	2.74971	5.02452	4.79737	5.00735	4.85289	5.363	5.2479	6.02186	7.97934	7.19294	5.89948	lnc-CNTN2-2	LNCipedia Identified Transcript//NONCODE class 'Exonic'	---	---	---	lnc-CNTN2-2:1	NonCoding	NONHSAT008975	---	---	---	chr1	+	205019656	205022129	1q32.1
TC0100004552.oe.1	0.0467621	up	2.74369	10.5732	8.06501	8.04573	8.36262	8.58705	8.96248	9.91713	10.728	11.3327	9.97384	lnc-MUC1-1	NONCODE class 'Exonic', Ensembl Cross Reference: ENST00000465596 Name: THBS3//LNCipedia Identified Transcript	---	---	---	lnc-MUC1-1:1	NonCoding	NONHSAT006705	---	---	---	chr1	-	155198071	155200049	1q22
TC0800002454.oe.1	0.000625	up	2.73902	6.71428	6.98423	6.52565	6.66977	7.0572	8.29338	7.52894	9.0347	8.39117	7.97125	lnc-FAM49B-9	NONCODE class 'Exonic', Ensembl Cross Reference: ENST00000520625 Name: ASAP1//LNCipedia Identified Transcript	---	---	---	lnc-FAM49B-9:1	NonCoding	NONHSAT129153	---	---	---	chr8	-	130360689	130401915	8q24.21
TC0600003399.oe.1	0.00028	up	2.73733	6.65238	6.09126	6.29627	6.41629	6.54	7.62324	7.32387	8.62613	7.80523	7.88158	lnc-WDR27-5	LNCipedia Identified Transcript//NONCODE class 'Exonic', Ensembl Cross Reference: ENST00000461848 Name: THBS2	---	---	---	lnc-WDR27-5:1	NonCoding	NONHSAT116191	---	---	---	chr6	-	169234510	169237412	6q27
TC1100000320.oe.1	0.000959	up	2.73489	8.96092	7.66901	8.04368	7.58322	8.18173	9.1947	9.74668	9.98355	9.27086	9.50019	lnc-PRMT3-1	NONCODE class 'Exonic', Ensembl Cross Reference: ENST00000533914 Name: HTATIP2//LNCipedia Identified Transcript	---	---	---	lnc-PRMT3-1:1	NonCoding	NONHSAT018365	---	---	---	chr11	+	20376017	20383778	11p15.1
TC08001644.hg.4	0.00534829	up	2.73353	5.33073	5.32008	6.41722	6.39477	6.19477	7.92614	6.7831	8.11915	6.68562	7.39736	ASAP1-IT1	ASAP1 intronic transcript 1 (non-protein coding)	---	29065	---	---	NonCoding	---	---	---	NR_002765	chr8	-	130295355	130296533	8q24.21
TC0100004990.oe.1	0.0303043	up	2.72946	4.0781	3.74041	3.72113	4.01523	4.51687	7.01446	5.95232	4.7431	3.90103	5.7039	lnc-ATP6V1G3-8	NONCODE class 'Linc', PubMed Identifer: PMID:23818866 FPKM1_group_2049_transcri//LNCipedia Identified Transcript - Alternate transcript name(s): FPKM1_group_2049_transcript_3	---	---	---	lnc-ATP6V1G3-8:1	NonCoding	NONHSAT008657	---	---	---	chr1	-	198840255	198840470	1q32.1
TC0100005316.oe.1	0.00167925	up	2.72934	7.63983	6.87642	6.46339	6.5207	7.29067	7.95393	7.93128	8.98385	8.81725	8.34747	lnc-CDC42BPA-5	LNCipedia Identified Transcript//NONCODE class 'Sense No Exonic'	---	---	---	lnc-CDC42BPA-5:1	NonCoding	NONHSAT009902	---	---	---	chr1	-	226732613	226734911	1q42.12
TC0900001858.oe.1	0.0248215	up	2.72486	6.23704	5.40318	6.4649	6.14664	6.42144	5.73082	7.63305	8.4722	8.29751	7.77052	lnc-RFK-5	NONCODE class 'Exonic', Ensembl Cross Reference: ENST00000464414 Name: PRUNE2//LNCipedia Identified Transcript	---	---	---	lnc-RFK-5:1	NonCoding	NONHSAT131960	---	---	---	chr9	-	76614008	76615162	9q21.2
TC1100000973.oe.1	0.00131476	up	2.71909	7.48511	6.88905	6.85532	6.66302	7.09744	7.72776	8.28026	8.88178	9.19426	8.1215	lnc-FADD-2	LNCipedia Identified Transcript//NONCODE class 'Exonic', Ensembl Cross Reference: ENST00000529913 Name: ANO1	---	---	---	lnc-FADD-2:2	NonCoding	NONHSAT022633	---	---	---	chr11	+	70104129	70116579	11q13.3
TC2100000445.oe.1	0.0192391	up	2.71817	8.17656	6.79761	6.96115	6.9564	7.32752	7.93852	8.28124	9.50516	9.89955	7.80796	lnc-FAM207A-8	LNCipedia Identified Transcript//NONCODE class 'Antisense'	---	---	---	lnc-FAM207A-8:1	NonCoding	NONHSAT082883	---	---	---	chr21	+	44849589	44850088	21q22.3
TC0400002792.oe.1	0.00317547	up	2.71431	6.13125	5.46084	5.06773	5.80343	5.73072	6.92684	6.93576	7.68969	6.11622	7.7284	lnc-CASP3-2	LNCipedia Identified Transcript//NONCODE class 'Exonic', Ensembl Cross Reference: ENST00000508095 Name: MLF1IP//NONCODE class 'Exonic', Ensembl Cross Reference: ENST00000502461 Name: MLF1IP	---	---	---	lnc-CASP3-2:2	NonCoding	NONHSAT099560//NONHSAT099559	---	---	---	chr4	-	184695129	184702481	4q35.1
TC0100004337.oe.1	0.00506452	up	2.7139	6.97466	5.11593	5.5578	5.31908	6.47297	7.59733	7.1689	7.26168	7.0044	7.60998	lnc-ZNF697-2	LNCipedia Identified Transcript//NONCODE class 'Exonic'	---	---	---	lnc-ZNF697-2:1	NonCoding	NONHSAT005572	---	---	---	chr1	-	119619415	119621498	1p12
TC0500000350.oe.1	0.0334741	up	2.71194	4.87936	5.3187	4.86788	5.09	5.50726	8.66698	6.21481	6.35025	5.43992	6.18787	lnc-NIPBL-6	NONCODE class 'Exonic', Ensembl Cross Reference: ENST00000504121 Name: SLC1A3//LNCipedia Identified Transcript//NONCODE class 'Exonic', Ensembl Cross Reference: ENST00000502864 Name: SLC1A3//NONCODE class 'Exonic', Ensembl Cross Reference: ENST00000509272 Name: SLC1A3	---	---	---	lnc-NIPBL-6:1	NonCoding	NONHSAT101038//NONHSAT101036//NONHSAT101037	---	---	---	chr5	+	36606611	36671234	5p13.2
TC0800002328.oe.1	0.000951	up	2.70922	6.30103	5.91354	6.76823	5.77349	7.01696	7.99584	7.87476	8.14915	7.27806	7.66485	lnc-SAMD12-5	LNCipedia Identified Transcript//NONCODE class 'Sense No Exonic'	---	---	---	lnc-SAMD12-5:1	NonCoding	NONHSAT128403	---	---	---	chr8	-	118034970	118035547	8q24.11
TC05001364.hg.4	0.00837654	up	2.70813	6.36257	4.94624	5.38084	4.89107	4.57337	7.24648	5.63101	6.80015	6.76876	6.89418	RNF138P1	ring finger protein 138, E3 ubiquitin protein ligase pseudogene 1	---	379013	---	---	NonCoding	---	---	uc003jqc.1	NR_001575	chr5	-	55528842	55534542	5q11.2
TC0100004989.oe.1	0.000673	up	2.7067	4.88027	4.82164	5.04066	4.97448	4.8014	6.4288	6.68145	6.18002	5.42907	6.98178	XLOC_001148//XLOC_001147//XLOC_001149//lnc-ATP6V1G3-3//NONHSAG003880//LINC01222//MIR181A1HG//lnc-ATP6V1G3-4//OTTHUMG00000035888//OTTHUMG00000035892	LNCipedia Identified Transcript - Alternate transcript name(s): RP11-31E23.1-001//LNCipedia Identified Transcript - Alternate transcript name(s): RP11-16L9.3-001//gene_id XLOC_001149; transcript_id TCONS_00000112; oId ucscTCONS_00006887; linc_name linc-ATP6V1G3-3; tss_id TSS1768; class_code .; gene_name linc-ATP6V1G3-3;//long intergenic non-protein coding RNA 1222 (LINC01222), long non-coding RNA…	ENST00000432296//ENST00000427439.1//ENST00000432296.1//ENST00000436880//ENST00000412162.1//ENST00000427439//ENST00000436880.2//ENST00000412162	---	OTTHUMT00000087441.1//OTTHUMT00000087435.1//OTTHUMT00000087436.1//OTTHUMT00000087434.1	lnc-ATP6V1G3-4:1//lnc-ATP6V1G3-3:4//lnc-ATP6V1G3-3:2//lnc-ATP6V1G3-4:4//lnc-ATP6V1G3-3:3//lnc-ATP6V1G3-4:5//lnc-ATP6V1G3-4:3//lnc-ATP6V1G3-4:6//lnc-ATP6V1G3-3:1//lnc-ATP6V1G3-4:2	NonCoding	NONHSAT008656//NONHSAT008655//NONHSAT008670//NONHSAT008664//NONHSAT008654	TCONS_00000712//TCONS_00000111//TCONS_00000112	---	NR_110525//NR_040073	chr1	-	198802218	199021037	1q32.1
TC0500001876.oe.1	0.00104762	up	2.7063	4.6022	4.25655	4.17162	4.10091	4.58206	6.23291	5.61001	6.50292	4.99133	5.55778	lnc-TAS2R1-20	LNCipedia Identified Transcript//NONCODE class 'Sense No Exonic'	---	---	---	lnc-TAS2R1-20:1	NonCoding	NONHSAT100334	---	---	---	chr5	-	9185858	9186226	5p15.31
TC0500000598.oe.1	0.0142709	up	2.69672	6.71206	6.94918	7.06731	7.28726	7.29342	7.60268	8.77618	9.51792	7.29334	9.27514	lnc-CENPH-2	LNCipedia Identified Transcript//NONCODE class 'Exonic'	---	---	---	lnc-CENPH-2:1	NonCoding	NONHSAT101891	---	---	---	chr5	+	69174926	69175546	5q13.2
TC0800002451.oe.1	0.000341	up	2.69248	9.07125	9.36961	9.7744	9.4248	9.71687	11.1673	10.6767	11.5592	10.4347	10.6637	lnc-FAM49B-5	LNCipedia Identified Transcript//NONCODE class 'Exonic', Ensembl Cross Reference: ENST00000524018 Name: ASAP1	---	---	---	lnc-FAM49B-5:1	NonCoding	NONHSAT129149	---	---	---	chr8	-	130152605	130160063	8q24.21
TC1500000436.oe.1	0.00565796	up	2.68007	9.47427	10.0752	9.49057	8.23034	10.1969	10.5042	10.7317	11.3944	11.061	10.8874	RP11-56B16.6	N/A	ENST00000621102.1	---	---	---	NonCoding	---	---	---	---	chr15	+	51833134	51833426	15q21.2
TC0800001428.oe.1	0.0100072	up	2.67407	10.6699	11.4479	10.8933	10.5559	11.1635	12.7876	11.7186	13.5761	12.3706	11.3728	lnc-RP11-297N6.4.1-3	LNCipedia Identified Transcript//NONCODE class 'Exonic', Ensembl Cross Reference: ENST00000532409 Name: CTSB	---	---	---	lnc-RP11-297N6.4.1-3:1	NonCoding	NONHSAT125096	---	---	---	chr8	-	11847093	11849578	8p23.1
TC0900001784.oe.1	0.00721075	up	2.67396	4.50032	4.17974	4.40195	4.70141	4.079	6.63401	6.01709	5.88876	4.35792	6.0595	lnc-ANKRD20A3-3	LNCipedia Identified Transcript - Alternate transcript name(s): ENST00000450911, OTTHUMT00000037052.2, RP11-327I22.8-001//LNCipedia Identified Transcript - Alternate transcript name(s): ENST00000450911//NONCODE class 'Linc', External ID: TCONS_00038401 Name: RP11-327I22.8, Ensembl Cross Reference: ENST00000450911 Name: RP11-327I22.8	---	---	---	lnc-ANKRD20A3-3:1	NonCoding	NONHSAT131356	---	---	---	chr9	-	66203445	66208833	9q21.11
TC1400001776.oe.1	0.000339	up	2.67107	9.91117	9.63486	9.2953	9.03971	9.95402	11.4798	11.0199	11.1395	10.6195	10.6634	lnc-ISM2-1	LNCipedia Identified Transcript//NONCODE class 'Exonic'	---	---	---	lnc-ISM2-1:1	NonCoding	NONHSAT037992	---	---	---	chr14	-	77506038	77506802	14q24.3
TC0300001754.oe.1	0.0173628	up	2.67087	6.41848	7.27052	5.69474	5.82958	6.14151	6.77272	7.85699	8.36801	8.61672	6.82695	lnc-HRASLS-4	LNCipedia Identified Transcript//NONCODE class 'Linc'	---	---	---	lnc-HRASLS-4:1	NonCoding	NONHSAT094005	---	---	---	chr3	+	193155972	193156339	3q29
TC0300002021.oe.1	0.000915	up	2.6697	4.64199	4.24058	4.80732	4.5654	4.93543	6.9048	5.89341	6.25417	5.42021	5.80151	lnc-DAZL-4	LNCipedia Identified Transcript//NONCODE class 'Exonic', Ensembl Cross Reference: ENST00000484752 Name: RFTN1	---	---	---	lnc-DAZL-4:1	NonCoding	NONHSAT088516	---	---	---	chr3	-	16378053	16484835	3p24.3
TC1700002908.oe.1	0.000423	up	2.66629	5.48761	5.97471	5.0446	5.40568	5.79415	7.14972	7.05195	7.40995	6.30389	6.86543	lnc-NT5C-3	LNCipedia Identified Transcript//NONCODE class 'Exonic', Ensembl Cross Reference: ENST00000481094 Name: HN1	---	---	---	lnc-NT5C-3:3	NonCoding	NONHSAT055860	---	---	---	chr17	-	75135984	75146780	17q25.1
TC0500000080.oe.1	0.00412275	up	2.66494	5.9342	5.74349	5.92894	5.94811	6.49892	7.20734	7.01346	8.02827	8.34066	6.53446	lnc-KIAA0947-3	LNCipedia Identified Transcript//NONCODE class 'Exonic', PubMed Identifer: PMID:22140575 brain_Pred32363 Name: ADAMTS16, Ensembl Cross Reference: ENST00000513709 Name: ADAMTS16	---	---	---	lnc-KIAA0947-3:1	NonCoding	NONHSAT100168	---	---	---	chr5	+	5235014	5239274	5p15.32
TC0400002608.oe.1	0.00129656	up	2.66442	6.39995	5.24716	5.21317	5.03797	5.67103	6.80698	6.86215	7.55143	6.64299	6.77485	lnc-RP11-171N4.2.1-4	NONCODE class 'Exonic', Ensembl Cross Reference: ENST00000513664 Name: PDGFC//LNCipedia Identified Transcript	---	---	---	lnc-RP11-171N4.2.1-4:1	NonCoding	NONHSAT098960	---	---	---	chr4	-	156967329	156970965	4q32.1
TC0500000343.oe.1	0.0367301	up	2.66282	4.88066	4.83065	4.51297	4.50626	4.61097	8.02622	5.64693	6.07217	4.5736	6.08735	lnc-SPEF2-1	LNCipedia Identified Transcript//NONCODE class 'Exonic', Ensembl Cross Reference: ENST00000509668 Name: IL7R	---	---	---	lnc-SPEF2-1:1	NonCoding	NONHSAT101015	---	---	---	chr5	+	35873201	35875521	5p13.2
TC1600000310.oe.1	0.00154323	up	2.66192	8.25186	8.06441	8.62702	8.39976	8.43922	10.7452	9.01644	9.68817	9.48206	9.91275	lnc-ERCC4-5	LNCipedia Identified Transcript//NONCODE class 'Exonic'	---	---	---	lnc-ERCC4-5:1	NonCoding	NONHSAT140673	---	---	---	chr16	+	14210204	14218915	16p13.12
TC0300002013.oe.1	0.00692516	up	2.65788	10.5928	10.4518	10.1237	9.71815	10.4247	10.6684	11.1019	12.4165	12.5004	11.6753	lnc-HACL1-7	NONCODE class 'Exonic', Ensembl Cross Reference: ENST00000460278 Name: ANKRD28//LNCipedia Identified Transcript	---	---	---	lnc-HACL1-7:1	NonCoding	NONHSAT088490	---	---	---	chr3	-	15724397	15756548	3p25.1
TC0100004336.oe.1	0.000438	up	2.65304	6.99596	6.02573	6.39847	6.22659	6.57921	7.2205	7.95305	8.34822	7.83425	7.90816	OTTHUMG00000176048//lnc-ZNF697-1//NONHSAG002594//LINC00622	long intergenic non-protein coding RNA 622 [Source:HGNC Symbol;Acc:HGNC:44251]//LNCipedia Identified Transcript - Alternate transcript name(s): RP4-599G15.7-001//LNCipedia Identified Transcript//NONCODE class 'Linc', External ID: TCONS_00003230 Name: LINC00622, Ensembl Cross Reference: ENST00000562811 Name: LINC00622//long intergenic non-protein coding RNA 622 (LINC00622), long non-coding RNA.	ENST00000562811.1//ENST00000562811	---	OTTHUMT00000431421.1	lnc-ZNF697-1:1//lnc-ZNF697-1:2	NonCoding	NONHSAT005570	---	---	NR_036540	chr1	-	119597702	119599291	1p12
TC1800000581.oe.1	0.00328335	up	2.65273	4.77477	4.66111	4.9276	4.29169	4.25988	7.0428	6.15038	5.82878	5.10656	5.82391	lnc-KIAA1468-3	NONCODE class 'Exonic', Ensembl Cross Reference: ENST00000587697 Name: TNFRSF11A//LNCipedia Identified Transcript	---	---	---	lnc-KIAA1468-3:1	NonCoding	NONHSAT059634	---	---	---	chr18	+	62357903	62360043	18q21.33
TC1500002253.oe.1	0.00314525	up	2.65181	7.25187	5.79716	6.50832	6.34948	6.37852	7.51334	7.08555	8.40369	8.18243	8.13523	lnc-SELS.1-2	LNCipedia Identified Transcript//NONCODE class 'Sense No Exonic', Ensembl Cross Reference: ENST00000561143 Name: CHSY1	---	---	---	lnc-SELS.1-2:1	NonCoding	NONHSAT051157	---	---	---	chr15	-	101187541	101189567	15q26.3
TC2100000663.oe.1	0.00128367	up	2.65163	12.3985	12.2988	11.441	11.3119	12.3698	13.0258	13.111	13.8419	13.6682	13.2075	lnc-ATP5J-3	LNCipedia Identified Transcript//NONCODE class 'Exonic', Ensembl Cross Reference: ENST00000548570 Name: APP	---	---	---	lnc-ATP5J-3:1	NonCoding	NONHSAT081527	---	---	---	chr21	-	26051160	26068338	21q21.3
TC1800000911.oe.1	0.00402916	up	2.64803	8.02966	7.0646	7.38729	6.55858	7.89882	9.37374	8.47946	8.83058	8.12226	9.1575	lnc-POTEC-9	NONCODE class 'Linc', Ensembl Cross Reference: ENST00000582820 Name: FGF7P1//LNCipedia Identified Transcript	---	---	---	lnc-POTEC-9:1	NonCoding	NONHSAT058537	---	---	---	chr18	-	14888709	14890086	18p11.21
TC1200000042.oe.1	4.34e-05	up	2.64333	5.65221	6.34271	6.27902	6.02171	6.05978	7.16544	7.21615	7.70052	7.79852	7.48659	lnc-FKBP4-5	NONCODE class 'Sense No Exonic', External ID: TCONS_00008041//LNCipedia Identified Transcript	---	---	---	lnc-FKBP4-5:1	NonCoding	NONHSAT025457	---	---	---	chr12	+	2377751	2386656	12p13.33
TC1200001961.oe.1	0.023594	up	2.64307	8.62263	7.91705	8.1712	8.29731	9.27779	8.21604	9.62065	10.3926	10.4907	10.5771	lnc-KIAA0528-4	LNCipedia Identified Transcript//NONCODE class 'Exonic'	---	---	---	lnc-KIAA0528-4:1	NonCoding	NONHSAT027269	---	---	---	chr12	-	22200648	22201136	12p12.1
TC1900000894.oe.1	0.000299	up	2.63643	6.79607	5.94509	6.51764	6.5533	6.25965	8.32065	7.30625	8.08808	7.59444	7.75526	lnc-ZFP36-1	LNCipedia Identified Transcript//NONCODE class 'Exonic', Ensembl Cross Reference: ENST00000474449 Name: PLEKHG2	---	---	---	lnc-ZFP36-1:1	NonCoding	NONHSAT066293	---	---	---	chr19	+	39421666	39422828	19q13.2
TC2100000305.oe.1	0.00851265	up	2.63585	5.72067	5.52341	5.18254	5.06638	4.89772	8.13316	6.05103	6.43167	6.55366	6.21254	lnc-DSCR8-5	LNCipedia Identified Transcript//NONCODE class 'Exonic'	---	---	---	lnc-DSCR8-5:1	NonCoding	NONHSAT082081	---	---	---	chr21	+	38229963	38291747	21q22.13
TC1100001263.oe.1	0.0322384	up	2.63542	11.6729	9.47143	9.66028	9.07724	9.91336	11.3574	11.6808	11.8954	10.209	11.6428	lnc-C11orf54-1//NONHSAG009372//OTTHUMG00000167450//SCARNA9	LNCipedia Identified Transcript - Alternate transcript name(s): SCARNA9-001//small Cajal body-specific RNA 9 [Source:HGNC Symbol;Acc:HGNC:32566]//LNCipedia Identified Transcript//NONCODE class 'Sense No Exonic', PubMed Identifer: PMID:22140575 mixed_Pred9464 Name: SCARNA9, PubMed Identifer: PMID:22140575 brain_Pred7735 Name: SCARNA9, External ID: TCONS_00005535 Name: SCARNA9, Ensembl Cross Refere…	ENST00000530422//ENST00000530422.1	---	OTTHUMT00000394646.2	lnc-C11orf54-1:2//lnc-C11orf54-1:1	NonCoding	NONHSAT023657//NONHSAT023656	---	---	---	chr11	+	93721513	93721865	11q21
TC1200001816.oe.1	0.0216707	up	2.62831	4.79012	5.19989	5.47463	5.21723	5.15309	8.12583	6.66279	6.70499	5.18329	6.12874	lnc-CD163-3	NONCODE class 'Exonic', Ensembl Cross Reference: ENST00000542055 Name: CD163L1//LNCipedia Identified Transcript//NONCODE class 'Exonic', Ensembl Cross Reference: ENST00000543841 Name: CD163L1	---	---	---	lnc-CD163-3:1	NonCoding	NONHSAT026250//NONHSAT026249	---	---	---	chr12	-	7354960	7367548	12p13.31
TC1600000788.oe.1	0.00111148	up	2.62474	5.05472	4.60375	4.73466	4.43338	5.01042	6.06881	5.80262	7.00045	6.39691	5.529	lnc-PAPD5-3	LNCipedia Identified Transcript//NONCODE class 'Exonic', Ensembl Cross Reference: ENST00000568731 Name: ADCY7	---	---	---	lnc-PAPD5-3:1	NonCoding	NONHSAT142406	---	---	---	chr16	+	50300820	50301964	16q12.1
TC0600002602.oe.1	0.000911	up	2.62413	5.34238	5.53908	5.55289	5.66484	5.7463	6.05182	6.87901	7.46493	6.90383	7.5051	lnc-BMP5-2	NONCODE class 'Exonic', Ensembl Cross Reference: ENST00000461489 Name: COL21A1//NONCODE class 'Exonic', External ID: TCONS_00033218//LNCipedia Identified Transcript//NONCODE class 'Exonic', Ensembl Cross Reference: ENST00000467045 Name: COL21A1//NONCODE class 'Exonic', Ensembl Cross Reference: ENST00000467216 Name: COL21A1	---	---	---	lnc-BMP5-2:1	NonCoding	NONHSAT113237//NONHSAT113238//NONHSAT113235//NONHSAT113236	---	---	---	chr6	-	56056591	56091688	6p12.1
TC1600002330.oe.1	0.00198599	up	2.62188	8.00901	6.32423	7.30649	7.17545	7.32017	8.5334	8.34785	9.02738	8.26489	8.91483	lnc-FHOD1-1	LNCipedia Identified Transcript//NONCODE class 'Exonic', Ensembl Cross Reference: ENST00000569085 Name: FHOD1	---	---	---	lnc-FHOD1-1:1	NonCoding	NONHSAT143103	---	---	---	chr16	-	67229387	67230196	16q22.1
TC0800001413.oe.1	0.00164911	up	2.62109	6.24022	5.73393	4.9922	5.77908	5.27557	6.86142	6.49117	7.53836	7.417	6.66388	lnc-AF131215.4.1-2	LNCipedia Identified Transcript - Alternate transcript name(s): ucscGeneNc_uc010lrv_1	---	---	---	lnc-AF131215.4.1-2:1	NonCoding	---	---	---	---	chr8	-	11160791	11162227	8p23.1
TC0100001482.oe.1	0.00035	up	2.62079	8.15731	7.90778	8.65699	9.11666	8.53619	9.96463	9.75342	10.2347	9.63848	9.73369	lnc-CTTNBP2NL-1	LNCipedia Identified Transcript - Alternate transcript name(s): ENST00000508462, OTTHUMT00000030690.1, RP4-671G15.3-001//NONCODE class 'Exonic', External ID: TCONS_00002970 Name: RP4-671G15.3, Ensembl Cross Reference: ENST00000508462 Name: RP4-671G15.3	---	---	---	lnc-CTTNBP2NL-1:1	NonCoding	NONHSAT005233	---	---	---	chr1	+	112456818	112463456	1p13.2
TC0700000049.oe.1	0.000126	up	2.61825	6.22787	5.82957	5.70084	5.44362	5.93522	7.30189	7.32926	7.29773	6.62202	7.52926	lnc-NUDT1-1	LNCipedia Identified Transcript//NONCODE class 'Exonic', Ensembl Cross Reference: ENST00000487426 Name: NUDT1	---	---	---	lnc-NUDT1-1:1	NonCoding	NONHSAT118783	---	---	---	chr7	+	2249285	2251146	7p22.3
TC0800001488.oe.1	0.0357041	up	2.61472	6.5968	5.72796	5.7996	6.47961	6.45539	5.84453	7.83064	8.55649	8.64086	7.12012	RP11-108A14.1	N/A	ENST00000623639.1	---	---	---	NonCoding	---	---	---	---	chr8	-	18864681	18865247	8p22
TC0900001487.oe.1	0.00203603	up	2.61421	5.7708	5.74075	6.05796	5.77172	6.1124	6.57428	6.67958	8.16548	7.65022	7.31595	lnc-C9orf92-4	NONCODE Identified Transcript//LNCipedia Identified Transcript//LNCipedia Identified Transcript - Alternate transcript name(s): uc_252_-//NONCODE class 'Exonic'	---	---	---	lnc-C9orf92-4:1	NonCoding	NONHSAT130291//NONHSAT130290	---	---	---	chr9	-	16583061	16714978	9p22.2
TC1900001532.oe.1	0.00149656	up	2.61256	5.92377	5.65259	5.68738	5.95841	6.0399	7.80117	6.80697	7.97837	7.09309	6.50975	lnc-AP3D1-1	LNCipedia Identified Transcript//NONCODE class 'Exonic', Ensembl Cross Reference: ENST00000592143 Name: MOB3A	---	---	---	lnc-AP3D1-1:1	NonCoding	NONHSAT060399	---	---	---	chr19	-	2073035	2085337	19p13.3
TC0800002448.oe.1	0.00474669	up	2.61237	8.53428	8.67744	9.35432	9.55227	9.66649	10.8209	9.9227	11.4622	10.1629	10.3429	lnc-FAM49B-4	LNCipedia Identified Transcript//NONCODE class 'Exonic', Ensembl Cross Reference: ENST00000520189 Name: ASAP1	---	---	---	lnc-FAM49B-4:1	NonCoding	NONHSAT129147	---	---	---	chr8	-	130076397	130112414	8q24.21
TC2000000475.oe.1	0.00045	up	2.6103	8.78911	8.1765	7.98949	7.79556	8.5896	9.70986	9.44388	10.0691	9.86249	9.17597	lnc-ZSWIM1-1	LNCipedia Identified Transcript//NONCODE class 'Exonic', Ensembl Cross Reference: ENST00000493522 Name: CTSA	---	---	---	lnc-ZSWIM1-1:1	NonCoding	NONHSAT079989	---	---	---	chr20	+	45892961	45894680	20q13.12
TC0500000419.oe.1	5e-05	up	2.60887	8.3588	8.05899	7.75346	7.7228	7.91786	9.33182	9.25146	9.84906	9.07402	9.22269	lnc-AC114947.1.1-8	LNCipedia Identified Transcript//NONCODE class 'Exonic', Ensembl Cross Reference: ENST00000506893 Name: NNT	---	---	---	lnc-AC114947.1.1-8:1	NonCoding	NONHSAT101326	---	---	---	chr5	+	43644745	43645665	5p12
TC1900001027.oe.1	0.000348	up	2.60809	6.58551	6.56265	6.01472	6.64598	6.68418	8.58308	7.44502	7.94496	7.86494	7.57001	lnc-CLASRP-2	LNCipedia Identified Transcript//NONCODE class 'Exonic', Ensembl Cross Reference: ENST00000510184 Name: RELB	---	---	---	lnc-CLASRP-2:1	NonCoding	NONHSAT066744	---	---	---	chr19	+	45021830	45025678	19q13.32
TSUnmapped00001598.oe.1	0.00852076	up	2.60579	4.73066	4.71662	4.58825	4.09561	4.30586	7.09885	5.81766	5.74531	4.71417	5.96962	lnc-ATP5SL-1	LNCipedia Identified Transcript	---	---	---	lnc-ATP5SL-1:11	NonCoding	---	---	---	---	---	---	---	---	---
TC1200001005.oe.1	0.000746	up	2.6041	5.8482	5.15435	5.36194	6.23756	5.93003	7.26041	6.79965	7.61096	6.63664	7.12835	lnc-SYT1-10	LNCipedia Identified Transcript//NONCODE class 'Exonic', Ensembl Cross Reference: ENST00000549369 Name: NAV3//NONCODE class 'Exonic', Ensembl Cross Reference: ENST00000551277 Name: NAV3	---	---	---	lnc-SYT1-10:1	NonCoding	NONHSAT029620//NONHSAT029619	---	---	---	chr12	+	77940267	77950895	12q21.2
TC1100002220.oe.1	3.56e-06	up	2.60321	11.0076	10.7869	10.7121	10.4592	10.9771	11.9662	12.2677	12.3857	12.1002	12.1246	lnc-C1QTNF4-1	NONCODE class 'Exonic', Ensembl Cross Reference: ENST00000534074 Name: MTCH2//LNCipedia Identified Transcript	---	---	---	lnc-C1QTNF4-1:1	NonCoding	NONHSAT021266	---	---	---	chr11	-	47618704	47629355	11p11.2
TC0400002108.oe.1	0.0123929	up	2.60292	4.59037	3.95234	3.86627	3.89049	3.96819	7.02945	4.72842	5.18441	5.02883	5.19719	lnc-COQ2-2	LNCipedia Identified Transcript//NONCODE class 'Exonic'	---	---	---	lnc-COQ2-2:1	NonCoding	NONHSAT097214	---	---	---	chr4	-	83292462	83294883	4q21.23
TC1200002817.oe.1	0.030013	up	2.60194	10.3775	8.50802	9.67993	9.12352	10.2086	9.67443	11.2809	12.1009	10.9595	10.7797	lnc-ALDH1L2-4	LNCipedia Identified Transcript//NONCODE class 'Exonic', Ensembl Cross Reference: ENST00000549713 Name: SLC41A2	---	---	---	lnc-ALDH1L2-4:1	NonCoding	NONHSAT030432	---	---	---	chr12	-	104804975	104834179	12q23.3
TC0X00001066.oe.1	0.000456	up	2.60157	5.47927	5.36878	5.81305	5.72268	5.68802	7.84112	6.58979	6.68656	7.08768	6.76354	lnc-RP11-706O15.1.1-8	LNCipedia Identified Transcript//NONCODE class 'Exonic', Ensembl Cross Reference: ENST00000462736 Name: PRKX//NONCODE class 'Exonic', Ensembl Cross Reference: ENST00000496648 Name: PRKX	---	---	---	lnc-RP11-706O15.1.1-8:1	NonCoding	NONHSAT136116//NONHSAT136117	---	---	---	chrX	-	3608625	3612281	Xp22.33
TC0800000237.oe.1	0.000538	up	2.59233	9.60726	8.91032	8.93264	9.71692	9.86533	10.7618	10.5541	11.0967	11.1007	10.3904	lnc-R3HCC1-3	LNCipedia Identified Transcript//NONCODE class 'Exonic', Ensembl Cross Reference: ENST00000521656 Name: CHMP7	---	---	---	lnc-R3HCC1-3:1	NonCoding	NONHSAT125551	---	---	---	chr8	+	23259893	23260587	8p21.3
TC1800000495.oe.1	0.00304089	up	2.59225	6.24874	5.82259	6.48263	6.26554	5.98723	7.36006	8.00767	7.22006	6.6698	8.42016	lnc-C18orf26-4	LNCipedia Identified Transcript//NONCODE class 'Exonic', Ensembl Cross Reference: ENST00000586594 Name: RAB27B	---	---	---	lnc-C18orf26-4:1	NonCoding	NONHSAT059353	---	---	---	chr18	+	54828481	54888113	18q21.2
TC2100000108.oe.1	0.00465601	up	2.59193	5.05109	4.5415	3.83068	4.64748	4.94448	6.70925	5.06025	6.39432	5.80132	5.92023	lnc-CHODL-12	LNCipedia Identified Transcript//NONCODE class 'Sense No Exonic'	---	---	---	lnc-CHODL-12:1	NonCoding	NONHSAT081379	---	---	---	chr21	+	21487090	21487379	21q21.1
TC0100001919.oe.1	0.0145548	up	2.58865	5.7783	5.39336	5.76071	5.90165	5.61079	8.4603	6.7819	7.60553	6.3658	6.09227	lnc-HSPA6-3	NONCODE class 'Exonic', Ensembl Cross Reference: ENST00000497474 Name: FCGR2A//LNCipedia Identified Transcript//NONCODE class 'Exonic', Ensembl Cross Reference: ENST00000473080 Name: FCGR2A	---	---	---	lnc-HSPA6-3:1	NonCoding	NONHSAT007171//NONHSAT007172	---	---	---	chr1	+	161505453	161506449	1q23.3
TC0300002991.oe.1	0.0197695	up	2.58842	7.89793	7.02699	7.03033	7.66483	7.53777	7.30305	8.91302	9.54336	9.77501	8.4838	lnc-PLOD2-4	LNCipedia Identified Transcript//NONCODE class 'Linc'	---	---	---	lnc-PLOD2-4:1	NonCoding	NONHSAT092544	---	---	---	chr3	-	146049631	146053016	3q24
TC1000000711.oe.1	0.000382	up	2.58821	6.96855	7.22657	7.21928	6.34225	7.27958	8.01855	8.16619	8.90311	8.26737	8.54076	lnc-OIT3-3	LNCipedia Identified Transcript//NONCODE class 'Exonic', Ensembl Cross Reference: ENST00000483185 Name: MCU	---	---	---	lnc-OIT3-3:2	NonCoding	NONHSAT013932	---	---	---	chr10	+	72859995	72868806	10q22.1
TSUnmapped00001937.oe.1	0.00033	up	2.58317	5.27054	5.3533	5.35131	5.33977	5.71365	7.50704	6.67596	6.64204	6.18125	6.868	lnc-C1QTNF1-2	LNCipedia Identified Transcript	---	---	---	lnc-C1QTNF1-2:1	NonCoding	---	---	---	---	---	---	---	---	---
TC0700001733.oe.1	0.000391	up	2.58244	6.61661	6.33386	7.05048	6.28754	7.21478	7.74587	7.74532	8.47349	8.1905	8.19177	lnc-EIF2AK1-2	LNCipedia Identified Transcript//NONCODE class 'Exonic', Ensembl Cross Reference: ENST00000465320 Name: CYTH3	---	---	---	lnc-EIF2AK1-2:1	NonCoding	NONHSAT118985	---	---	---	chr7	-	6164740	6170221	7p22.1
TC1000000160.oe.1	0.0056214	up	2.58124	5.61646	5.75448	5.41208	5.31087	5.60073	8.29111	6.54053	6.82274	6.58884	6.29172	lnc-ECHDC3-9	LNCipedia Identified Transcript//NONCODE class 'Sense No Exonic'	---	---	---	lnc-ECHDC3-9:1	NonCoding	NONHSAT011406	---	---	---	chr10	+	11177740	11179293	10p14
TC1400000415.oe.1	0.002882	up	2.58064	6.8442	6.20592	6.07092	5.71487	6.10612	7.74457	7.40931	8.15349	6.60452	7.86878	lnc-CDKN3-2	NONCODE class 'Exonic', Ensembl Cross Reference: ENST00000216414 Name: CDKN3//NONCODE class 'Exonic', Ensembl Cross Reference: ENST00000556305 Name: CDKN3//LNCipedia Identified Transcript//NONCODE class 'Exonic', Ensembl Cross Reference: ENST00000555837 Name: CDKN3//NONCODE class 'Exonic', PubMed Identifer: PMID:22140575 mixed_Pred14128	---	---	---	lnc-CDKN3-2:1	NonCoding	NONHSAT036957//NONHSAT036954//NONHSAT036955//NONHSAT036956	---	---	---	chr14	+	54396849	54420214	14q22.2
TC0600001937.oe.1	0.00904212	up	2.57854	11.8164	9.81317	10.0542	10.1454	10.2489	11.1028	11.8631	11.8984	11.8963	12.1503	lnc-SLC22A23-7	LNCipedia Identified Transcript//NONCODE class 'Exonic'	---	---	---	lnc-SLC22A23-7:1	NonCoding	NONHSAT107018	---	---	---	chr6	-	3224484	3225132	6p25.2
TC1700001222.oe.1	0.00266094	up	2.57554	7.78969	7.27309	6.9157	6.28909	6.98729	9.09806	8.10498	8.58756	8.35656	7.93208	lnc-CEP95-2	NONCODE class 'Exonic', External ID: TCONS_00016209//LNCipedia Identified Transcript	---	---	---	lnc-CEP95-2:1	NonCoding	NONHSAT055278	---	---	---	chr17	+	64465453	64466651	17q23.3
TC1500001030.oe.1	0.0010335	up	2.57448	6.74679	6.65762	7.11821	6.44176	6.99055	8.9902	7.98637	8.04364	8.26525	7.49088	lnc-ST8SIA2-1	LNCipedia Identified Transcript//NONCODE class 'Exonic', Ensembl Cross Reference: ENST00000556649 Name: SLCO3A1	---	---	---	lnc-ST8SIA2-1:1	NonCoding	NONHSAT048511	---	---	---	chr15	+	91941318	92104537	15q26.1
TC0300001516.oe.1	0.039433	up	2.57441	12.1541	9.21347	9.7635	9.76941	10.4274	11.3066	12.481	11.4848	11.578	11.2988	lnc-SKIL-4	LNCipedia Identified Transcript//NONCODE class 'Exonic'	---	---	---	lnc-SKIL-4:1	NonCoding	NONHSAT093199	---	---	---	chr3	+	170394617	170397227	3q26.2
TC0400000841.oe.1	0.000246	up	2.57276	12.0709	11.4892	11.5631	11.5765	11.9589	13.1042	13.2969	13.6458	12.8543	12.574	lnc-GAR1-2	LNCipedia Identified Transcript//NONCODE class 'Exonic', Ensembl Cross Reference: ENST00000494604 Name: CCDC109B	---	---	---	lnc-GAR1-2:1	NonCoding	NONHSAT097791	---	---	---	chr4	+	109684440	109687716	4q25
TC1000000976.oe.1	0.00115982	up	2.57199	5.41079	5.47258	5.43893	5.48105	5.26045	7.45343	7.01289	6.80666	5.78463	6.8206	lnc-C10orf131-1//OTTHUMG00000018817//RP11-429G19.3//NONHSAG006589	NONCODE class 'Exonic', External ID: TCONS_00005027 Name: RP11-429G19.3, Ensembl Cross Reference: ENST00000433113 Name: RP11-429G19.3//N/A//LNCipedia Identified Transcript - Alternate transcript name(s): RP11-429G19.3-001	ENST00000433113.1//ENST00000433113	---	OTTHUMT00000049558.1	lnc-C10orf131-1:1	NonCoding	NONHSAT015767	---	---	---	chr10	+	95833508	95873758	10q24.1
TC0400000158.oe.1	0.00162188	up	2.57161	4.17042	4.09016	4.24962	3.8765	3.80891	4.52827	5.05803	5.72921	5.54532	6.14812	lnc-METTL19-7	LNCipedia Identified Transcript//NONCODE class 'Exonic', Ensembl Cross Reference: ENST00000513486 Name: CPZ	---	---	---	lnc-METTL19-7:1	NonCoding	NONHSAT095112	---	---	---	chr4	+	8618092	8619487	4p16.1
TC0200002738.oe.1	0.0417347	up	2.57081	5.86808	5.65476	5.75421	6.57283	5.46255	5.20245	7.30995	8.18667	7.47669	7.94779	AC064875.2//lnc-NTSR2-5//XLOC_001992//NONHSAG027039//OTTHUMG00000151711//LOC100506474	NONCODE class 'Linc', External ID: TCONS_00022304//gene_id XLOC_001992; transcript_id TCONS_00004152; oId TCONS_00007596; linc_name linc-NTSR2-2; tss_id TSS3165; class_code u; gene_name linc-NTSR2-2;//gene_id XLOC_001992; transcript_id TCONS_00003208; oId ENST00000422996; linc_name linc-NTSR2-2; tss_id TSS3163; class_code u; gene_name linc-NTSR2-2;//LNCipedia Identified Transcript - Alternate tra…	ENST00000425974//ENST00000414661//ENST00000421112//ENST00000425974.4//ENST00000421112.1//ENST00000422996.1//ENST00000422996//ENST00000414661.1	---	OTTHUMT00000323587.1//OTTHUMT00000323590.1//OTTHUMT00000323588.1//OTTHUMT00000323589.1	lnc-NTSR2-5:8//lnc-NTSR2-5:4//lnc-NTSR2-5:5//lnc-NTSR2-5:9//lnc-NTSR2-5:2//lnc-NTSR2-5:6//lnc-NTSR2-5:7//lnc-NTSR2-5:3//lnc-NTSR2-5:1	NonCoding	NONHSAT069238//NONHSAT069236//NONHSAT069244//NONHSAT069237//NONHSAT069241//NONHSAT069243//NONHSAT069242	TCONS_00004151//TCONS_00002746//TCONS_00003208//TCONS_00004150//TCONS_00004152//TCONS_00003207	---	NR_038434	chr2	-	12966782	13007013	2p24.3
TC2100000173.oe.1	0.0175945	up	2.57048	8.72348	7.60049	8.29795	7.51845	8.32573	9.80416	8.53005	10.6718	9.60865	8.66163	lnc-C21orf7-1	LNCipedia Identified Transcript//NONCODE class 'Exonic'	---	---	---	lnc-C21orf7-1:3	NonCoding	NONHSAT081636	---	---	---	chr21	+	29329488	29329693	21q21.3
TC1800001340.oe.1	0.00260211	up	2.56904	6.49376	5.70476	5.9383	6.23385	6.62937	8.3397	7.70275	7.75305	6.74626	7.26442	lnc-FBXO15-6	NONCODE class 'Exonic', Ensembl Cross Reference: ENST00000580678 Name: CYB5A//NONCODE class 'Exonic', Ensembl Cross Reference: ENST00000579405 Name: CYB5A//LNCipedia Identified Transcript//NONCODE class 'Exonic', Ensembl Cross Reference: ENST00000579064 Name: CYB5A	---	---	---	lnc-FBXO15-6:1	NonCoding	NONHSAT059869//NONHSAT059866//NONHSAT059867	---	---	---	chr18	-	74253295	74261681	18q22.3
TC1400000529.oe.1	0.0287083	up	2.56438	5.16017	4.79836	4.6833	4.32759	4.50128	7.77259	6.16446	5.88028	4.75802	5.68839	lnc-RP11-47I22.3.1-1	LNCipedia Identified Transcript//NONCODE class 'Exonic', Ensembl Cross Reference: ENST00000556245 Name: PRKCH	---	---	---	lnc-RP11-47I22.3.1-1:1	NonCoding	NONHSAT037258	---	---	---	chr14	+	61543362	61550972	14q23.1
TC1500001569.oe.1	0.000376	up	2.56233	7.53176	7.02815	7.73794	7.19725	7.68058	9.07258	8.36829	9.255	8.92033	8.34676	lnc-MYO5C-1	NONCODE class 'Exonic', Ensembl Cross Reference: ENST00000465290 Name: MYO5A//LNCipedia Identified Transcript	---	---	---	lnc-MYO5C-1:1	NonCoding	NONHSAT043929	---	---	---	chr15	-	52321469	52323896	15q21.2
TC0500001880.oe.1	0.00941581	up	2.56075	4.38692	4.17787	3.94131	4.33451	4.29415	6.61983	4.71039	6.38899	4.86314	5.33523	lnc-TAS2R1-16	LNCipedia Identified Transcript//NONCODE class 'Sense No Exonic'	---	---	---	lnc-TAS2R1-16:1	NonCoding	NONHSAT100345	---	---	---	chr5	-	9257121	9257367	5p15.31
TC0600003021.oe.1	0.000741	up	2.56048	5.36305	5.45949	5.11504	4.68758	5.09342	5.6512	6.56885	6.62134	6.81565	6.84361	lnc-THEMIS-1	NONCODE class 'Sense No Exonic', External ID: TCONS_00032739 Name: RP1-86D1.2, Ensembl Cross Reference: ENST00000434560 Name: RP1-86D1.2//LNCipedia Identified Transcript - Alternate transcript name(s): RP1-86D1.2-001//N/A	ENST00000434560	---	OTTHUMT00000042172.1	lnc-THEMIS-1:1	NonCoding	NONHSAT114865	---	---	---	chr6	-	128430941	128432768	6q22.33
TC0200000206.oe.1	0.00386795	up	2.56044	5.53658	5.3484	6.34616	5.30343	6.23197	7.70573	6.85778	7.38155	6.2511	7.35231	lnc-MSGN1-1	LNCipedia Identified Transcript//NONCODE class 'Exonic', Ensembl Cross Reference: ENST00000534451 Name: GEN1	---	---	---	lnc-MSGN1-1:1	NonCoding	NONHSAT069358	---	---	---	chr2	+	17772648	17774472	2p24.2
TC1000001484.oe.1	0.000258	up	2.56034	11.8793	10.8822	11.2385	11.0077	11.5092	12.5717	12.3278	12.9355	12.4987	12.9649	lnc-KLF6-8	NONCODE class 'Exonic', Ensembl Cross Reference: ENST00000461124 Name: KLF6//LNCipedia Identified Transcript//NONCODE class 'Exonic', Ensembl Cross Reference: ENST00000173785 Name: KLF6	---	---	---	lnc-KLF6-8:2	NonCoding	NONHSAT011054//NONHSAT139949	---	---	---	chr10	-	3775996	3782051	10p15.2
TC1100002761.oe.1	0.0167841	up	2.5599	7.07497	5.91798	6.13523	6.2612	6.35466	7.21986	7.3824	8.43877	6.64409	8.83936	lnc-CCDC89-4	LNCipedia Identified Transcript//NONCODE Identified Transcript, Ensembl Cross Reference: ENST00000528566 Name: SYTL2//NONCODE Identified Transcript, Ensembl Cross Reference: ENST00000530894 Name: SYTL2//NONCODE Identified Transcript, Ensembl Cross Reference: ENST00000534554 Name: SYTL2//NONCODE class 'Exonic'	---	---	---	lnc-CCDC89-4:1	NonCoding	NONHSAT023446//NONHSAT023445//NONHSAT023447//NONHSAT023444	---	---	---	chr11	-	85704966	85719180	11q14.1
TC0100004136.oe.1	0.00101262	up	2.55777	6.5885	6.01633	5.80005	6.5107	6.1274	7.81225	7.65363	8.08224	6.74902	7.52029	lnc-FRRS1-3	NONCODE class 'Exonic', Ensembl Cross Reference: ENST00000370176 Name: FRRS1//LNCipedia Identified Transcript	---	---	---	lnc-FRRS1-3:1	NonCoding	NONHSAT004759	---	---	---	chr1	-	99747595	99766631	1p21.2
TSUnmapped00000145.oe.1	0.0153197	up	2.55705	4.82205	4.41529	4.87876	4.40476	4.28432	7.48151	5.07193	5.55396	5.38945	6.08074	lnc-POTEG-4	LNCipedia Identified Transcript	---	---	---	lnc-POTEG-4:11	NonCoding	---	---	---	---	---	---	---	---	---
TC0100005568.oe.1	0.00241485	up	2.55553	9.57502	8.58616	9.0046	8.39521	9.46071	10.9612	10.402	10.6176	9.86052	9.94842	NONHSAG004919//lnc-ZNF124-1//RP11-488L18.10//OTTHUMG00000176477	NONCODE class 'Linc', External ID: TCONS_00001251 Name: RP11-488L18.10, Ensembl Cross Reference: ENST00000566446 Name: RP11-488L18.10//N/A//LNCipedia Identified Transcript - Alternate transcript name(s): RP11-488L18.10-001	ENST00000566446.1//ENST00000566446	---	OTTHUMT00000432177.1	lnc-ZNF124-1:1	NonCoding	NONHSAT010762	---	---	---	chr1	-	247187281	247188526	1q44
TC0100002628.oe.1	0.00102766	up	2.55505	12.6812	13.0662	12.9355	13.1525	13.0412	13.4341	14.6869	14.948	14.3431	14.2314	lnc-CAPN2-1	LNCipedia Identified Transcript//NONCODE class 'Exonic', Ensembl Cross Reference: ENST00000463997 Name: CAPN2	---	---	---	lnc-CAPN2-1:1	NonCoding	NONHSAT009744	---	---	---	chr1	+	223770623	223776018	1q41
TC0300002012.oe.1	0.00760098	up	2.55298	11.5876	11.2376	10.773	10.8962	11.0642	11.3774	11.8694	13.1251	13.0698	12.8778	lnc-HACL1-6	LNCipedia Identified Transcript//NONCODE class 'Exonic', Ensembl Cross Reference: ENST00000462657 Name: ANKRD28	---	---	---	lnc-HACL1-6:1	NonCoding	NONHSAT088488	---	---	---	chr3	-	15689840	15696231	3p25.1
TC0100005060.oe.1	0.00134483	up	2.55161	5.89383	5.63553	5.6023	5.56856	5.59906	8.00679	6.51414	6.7496	6.59636	7.18942	lnc-PPP1R15B-1	LNCipedia Identified Transcript//NONCODE class 'Exonic', Ensembl Cross Reference: ENST00000462752 Name: PIK3C2B	---	---	---	lnc-PPP1R15B-1:1	NonCoding	NONHSAT008950	---	---	---	chr1	-	204431340	204432271	1q32.1
TC1200000290.oe.1	0.00593005	up	2.54554	4.91693	4.90973	5.24293	4.49049	5.25414	7.53719	6.41827	5.9984	5.56588	6.03433	lnc-DERA-4	NONCODE Identified Transcript, Ensembl Cross Reference: ENST00000534835 Name: MGST1//NONCODE Identified Transcript, Ensembl Cross Reference: ENST00000395815//NONCODE class 'Exonic'//NONCODE Identified Transcript, Ensembl Cross Reference: ENST00000537878 Name: MGST1//NONCODE Identified Transcript//LNCipedia Identified Transcript//NONCODE Identified Transcript, Ensembl Cross Reference: ENST00000542…	---	---	---	lnc-DERA-4:1	NonCoding	NONHSAT027137//NONHSAT027134//NONHSAT027139//NONHSAT027135//NONHSAT027136//NONHSAT027138	---	---	NR_048545	chr12	+	16347643	16370408	12p12.3
TC1200002796.oe.1	0.00472484	up	2.5453	4.29323	4.38657	4.13749	4.251	4.73664	6.69605	5.11371	6.24092	4.95051	5.54294	lnc-PMCH-5	LNCipedia Identified Transcript - Alternate transcript name(s): predAs_chen_N92597_1	---	---	---	lnc-PMCH-5:1	NonCoding	---	---	---	---	chr12	-	102470972	102477775	12q23.2
TC0100001216.oe.1	0.0146858	up	2.545	6.35682	5.5191	6.87975	6.12977	6.58292	8.83934	7.31821	7.63263	6.57217	7.84432	lnc-LRRC8C-2	LNCipedia Identified Transcript - Alternate transcript name(s): ENST00000507783, OTTHUMT00000029424.1, RP5-1007M22.3-001//NONCODE class 'Exonic', External ID: TCONS_00002928	---	---	---	lnc-LRRC8C-2:1	NonCoding	NONHSAT004358	---	---	---	chr1	+	89584488	89596573	1p22.2
TC0200001923.oe.1	0.00290581	up	2.54433	9.57704	9.00454	8.37893	9.04079	9.07637	9.76963	10.2095	11.2178	10.6239	9.99325	lnc-FAM171B-2	LNCipedia Identified Transcript//NONCODE class 'Exonic', Ensembl Cross Reference: ENST00000460641 Name: ITGAV	---	---	---	lnc-FAM171B-2:1	NonCoding	NONHSAT076000	---	---	---	chr2	+	186665126	186668020	2q32.1
TC1000001673.oe.1	0.000599	up	2.54223	8.54665	7.36986	7.79922	7.27097	7.80852	8.82822	9.03332	9.27877	9.38332	9.00204	lnc-PRTFDC1-2	NONCODE class 'Exonic', Ensembl Cross Reference: ENST00000483114 Name: ARHGAP21//LNCipedia Identified Transcript	---	---	---	lnc-PRTFDC1-2:1	NonCoding	NONHSAT011787	---	---	---	chr10	-	24620879	24622842	10p12.1
TC1500000563.oe.1	0.0026468	up	2.542	7.65575	7.36878	8.11214	7.73478	7.80728	9.85885	8.65063	9.51162	8.24427	9.14317	lnc-LACTB-2	LNCipedia Identified Transcript//NONCODE class 'Exonic', Ensembl Cross Reference: ENST00000561242 Name: TPM1//NONCODE class 'Exonic', Ensembl Cross Reference: ENST00000560131 Name: TPM1//NONCODE class 'Exonic', Ensembl Cross Reference: ENST00000559108 Name: TPM1	---	---	---	lnc-LACTB-2:1	NonCoding	NONHSAT046593//NONHSAT046591//NONHSAT046592	---	---	---	chr15	+	63061234	63066093	15q22.2
TC0100003258.oe.1	0.0323108	up	2.54043	11.9653	9.225	9.55137	9.8278	10.0077	11.4409	11.6185	11.6416	11.8813	10.7202	lnc-USP48-2	LNCipedia Identified Transcript//NONCODE class 'Exonic', Ensembl Cross Reference: ENST00000469378 Name: HSPG2	---	---	---	lnc-USP48-2:1	NonCoding	NONHSAT001439	---	---	---	chr1	-	21833116	21833614	1p36.12
TC1100002344.oe.1	0.00210038	up	2.54042	11.7245	11.7391	11.8392	11.9457	12.1295	13.8561	12.7363	14.0096	12.7749	12.7265	lnc-RAB3IL1-2	NONCODE class 'Exonic', Ensembl Cross Reference: ENST00000533138 Name: FTH1//LNCipedia Identified Transcript//NONCODE class 'Exonic'	---	---	---	lnc-RAB3IL1-2:1	NonCoding	NONHSAT021727//NONHSAT021728	---	---	---	chr11	-	61964838	61967633	11q12.3
TC10001030.hg.4	0.00116181	up	2.53907	5.26299	4.93153	4.8089	4.68138	4.84586	6.58133	5.99761	6.81514	5.38053	6.47756	SFTA1P	surfactant associated 1, pseudogene//novel transcript	ENST00000434919//ENST00000415590//ENST00000446372	207107	OTTHUMT00000046743//OTTHUMT00000046744//OTTHUMT00000046745	---	NonCoding	---	---	uc001ikf.1	NR_027082	chr10	-	10784439	10794980	10p14
TC1100000558.oe.1	0.00616652	up	2.53453	5.30037	5.78076	5.98923	6.09446	6.19672	6.10308	7.48638	8.0075	6.91458	7.55858	lnc-DGKZ-1	LNCipedia Identified Transcript//NONCODE class 'Exonic', Ensembl Cross Reference: ENST00000534616 Name: CREB3L1	---	---	---	lnc-DGKZ-1:1	NonCoding	NONHSAT021166	---	---	---	chr11	+	46315479	46320299	11p11.2
TC1700000668.oe.1	0.00893442	up	2.53084	5.03269	5.57021	4.89032	5.45407	5.15079	7.1107	6.00018	7.73201	6.13652	5.81679	lnc-CCL18-3//NONHSAG021581	LNCipedia Identified Transcript//NONCODE class 'Exonic', Ensembl Cross Reference: ENST00000591883 Name: CCL4	---	---	---	lnc-CCL18-3:1	NonCoding	NONHSAT053178	---	---	---	chr17	+	36103841	36105614	17q12
TC1900000865.oe.1	0.000961	up	2.52766	8.69488	7.72963	7.68174	7.38998	8.16291	9.01035	9.78517	9.20688	9.20687	9.1389	lnc-KCNK6-1	LNCipedia Identified Transcript//N/A//NONCODE class 'Linc', External ID: TCONS_00019372 Name: AC026806.2, Ensembl Cross Reference: ENST00000602211 Name: AC026806.2	ENST00000602211	---	---	lnc-KCNK6-1:1	NonCoding	NONHSAT066205	---	---	---	chr19	+	38331634	38332076	19q13.2
TC0500002492.oe.1	0.00231932	up	2.52543	4.43711	4.00853	4.12798	3.77256	4.30582	5.60485	5.34135	4.75983	6.45086	5.17777	lnc-HAPLN1-1//NONHSAG040910//OTTHUMG00000162571//VCAN-AS1	VCAN antisense RNA 1 [Source:HGNC Symbol;Acc:HGNC:40163]//LNCipedia Identified Transcript - Alternate transcript name(s): VCAN-AS1-001//NONCODE class 'Antisense', External ID: TCONS_00030663 Name: VCAN-AS1, Ensembl Cross Reference: ENST00000513899 Name: VCAN-AS1	ENST00000513899//ENST00000513899.1	---	OTTHUMT00000369639.1	lnc-HAPLN1-1:1	NonCoding	NONHSAT102521	---	---	---	chr5	-	83541477	83581320	5q14.3
TC0100003330.oe.1	0.0214113	up	2.52224	6.93894	8.29148	8.66179	7.66764	8.51008	9.77746	9.12431	9.44503	8.18025	10.2164	lnc-PAQR7-1	LNCipedia Identified Transcript//NONCODE class 'Exonic', Ensembl Cross Reference: ENST00000465604 Name: STMN1//NONCODE class 'Exonic'	---	---	---	lnc-PAQR7-1:1	NonCoding	NONHSAT001763//NONHSAT001762	---	---	---	chr1	-	25900568	25906417	1p36.11
TC1700002356.oe.1	0.024345	up	2.51838	6.03225	6.16725	5.95024	4.86469	6.01149	6.32203	6.68131	8.39557	6.42167	7.8678	lnc-GJD3-2	LNCipedia Identified Transcript//NONCODE class 'Exonic'	---	---	---	lnc-GJD3-2:1	NonCoding	NONHSAT053548	---	---	---	chr17	-	40416817	40417915	17q21.2
TC1300001082.oe.1	0.00144665	up	2.51737	6.88637	6.06506	6.40871	6.40947	6.96525	8.15161	7.59405	8.62854	7.4025	7.61776	RP11-141M1.1//NONHSAG013196//lnc-STARD13-3	NONCODE Identified Transcript, External ID: TCONS_00009701 Name: RP11-141M1.1, Ensembl Cross Reference: ENST00000443576 Name: RP11-141M1.1//LNCipedia Identified Transcript//NONCODE class 'Sense No Exonic'//N/A	ENST00000443576.3//ENST00000443576	---	---	lnc-STARD13-3:2//lnc-STARD13-3:3//lnc-STARD13-3:1	NonCoding	NONHSAT033141//NONHSAT033142	---	---	---	chr13	-	33308987	33350656	13q13.1
TC0900000660.oe.1	0.0116743	up	2.51708	4.22257	4.62192	4.36394	4.27221	4.77224	7.2562	5.46252	5.83694	4.93009	5.42589	lnc-CTSL1-4	LNCipedia Identified Transcript//NONCODE class 'Exonic', Ensembl Cross Reference: ENST00000468482 Name: DAPK1	---	---	---	lnc-CTSL1-4:1	NonCoding	NONHSAT132866	---	---	---	chr9	+	87698409	87700217	9q21.33
TC1100002912.oe.1	0.000853	up	2.51501	4.84645	4.50337	5.08502	4.31168	4.70512	6.65084	5.65633	6.38092	5.4724	5.94397	lnc-CASP12-3	NONCODE class 'Linc', Ensembl Cross Reference: ENST00000530264 Name: RP11-693N9.2//NONCODE class 'Linc', Ensembl Cross Reference: ENST00000532510 Name: RP11-693N9.2//NONCODE class 'Linc', External ID: TCONS_00006413//LNCipedia Identified Transcript//NONCODE class 'Linc', Ensembl Cross Reference: ENST00000534659 Name: RP11-693N9.2//NONCODE class 'Linc', Ensembl Cross Reference: ENST00000531371 Nam…	---	---	---	lnc-CASP12-3:1	NonCoding	NONHSAT023941//NONHSAT023944//NONHSAT140037//NONHSAT023942//NONHSAT023943	---	---	---	chr11	-	104901549	104919073	11q22.3
TC0100002104.oe.1	9.52e-05	up	2.51031	7.25523	6.6506	6.90876	6.8512	7.1013	7.82281	8.30405	8.74936	8.40398	8.1262	lnc-C1orf49-1	NONCODE class 'Exonic', Ensembl Cross Reference: ENST00000465723 Name: RASAL2//LNCipedia Identified Transcript	---	---	---	lnc-C1orf49-1:1	NonCoding	NONHSAT007816	---	---	---	chr1	+	178120961	178300055	1q25.2
TC1600001252.oe.1	0.00435277	up	2.5053	5.62464	4.74332	5.05711	4.88986	5.42856	5.69038	6.09185	7.36779	6.8666	6.35178	lnc-PLCG2-2	NONCODE class 'Exonic', Ensembl Cross Reference: ENST00000561605 Name: CMIP//LNCipedia Identified Transcript	---	---	---	lnc-PLCG2-2:1	NonCoding	NONHSAT143955	---	---	---	chr16	+	81703857	81707085	16q23.3
TC0500002440.oe.1	2.77e-05	up	2.50187	6.75683	6.67217	7.0446	6.57262	6.89953	8.26435	8.24623	8.40289	7.98383	7.66348	lnc-DMGDH-2	LNCipedia Identified Transcript//NONCODE class 'Exonic', Ensembl Cross Reference: ENST00000521800 Name: ARSB	---	---	---	lnc-DMGDH-2:1	NonCoding	NONHSAT102339	---	---	---	chr5	-	78884294	78885830	5q14.1
TC0400002081.oe.1	0.0295646	up	2.50055	8.27279	6.55861	7.38586	7.16437	7.41894	10.0345	7.73978	8.7907	8.98218	7.86466	lnc-PRKG2-1	LNCipedia Identified Transcript//NONCODE class 'Exonic', Ensembl Cross Reference: ENST00000514889 Name: RASGEF1B	---	---	---	lnc-PRKG2-1:1	NonCoding	NONHSAT097148	---	---	---	chr4	-	81452029	81457602	4q21.21
TC0100003580.oe.1	0.00646578	up	2.50025	7.70995	6.68452	7.11371	7.25228	7.13877	7.3839	8.4426	9.22653	9.0452	8.41137	lnc-CLDN19-2	NONCODE class 'Exonic', Ensembl Cross Reference: ENST00000472802 Name: LEPRE1//LNCipedia Identified Transcript//NONCODE class 'Exonic', Ensembl Cross Reference: ENST00000460831 Name: LEPRE1//NONCODE class 'Exonic', Ensembl Cross Reference: ENST00000462474 Name: LEPRE1	---	---	---	lnc-CLDN19-2:1	NonCoding	NONHSAT002747//NONHSAT002748//NONHSAT002749	---	---	---	chr1	-	42746508	42748743	1p34.2
TC1200002469.oe.1	0.00251782	up	2.49858	6.97173	8.10242	7.36872	7.01417	7.57545	9.59875	8.40719	8.66899	8.38161	8.5815	OTTHUMG00000168756//RP11-196H14.3//lnc-C12orf66-1//NONHSAG011525	LNCipedia Identified Transcript - Alternate transcript name(s): RP11-196H14.3-001//NONCODE class 'Antisense', External ID: TCONS_00007801 Name: RP11-196H14.3, Ensembl Cross Reference: ENST00000536455 Name: RP11-196H14.3//N/A	ENST00000536455.1//ENST00000536455	---	OTTHUMT00000400907.1	lnc-C12orf66-1:1	NonCoding	NONHSAT029129	---	---	---	chr12	-	64146388	64147857	12q14.2
TC0300002010.oe.1	0.00931492	up	2.49832	11.9032	11.535	11.5432	11.3791	11.3983	11.4622	12.7426	13.4766	13.2269	13.4551	lnc-HACL1-4	LNCipedia Identified Transcript//NONCODE class 'Exonic', Ensembl Cross Reference: ENST00000479043 Name: ANKRD28	---	---	---	lnc-HACL1-4:1	NonCoding	NONHSAT088486	---	---	---	chr3	-	15676596	15677606	3p25.1
TC0600002564.oe.1	0.00107936	up	2.49486	12.2891	11.819	11.8812	11.8354	12.0928	13.7463	13.1182	14.0253	12.7794	12.8431	lnc-PKHD1-6	NONCODE class 'Linc', Ensembl Cross Reference: ENST00000425761 Name: FTH1P5//LNCipedia Identified Transcript	---	---	---	lnc-PKHD1-6:1	NonCoding	NONHSAT113088	---	---	---	chr6	-	50912712	50913256	6p12.3
TC0100004515.oe.1	0.00125644	up	2.49243	9.81107	8.97905	9.47285	9.59397	9.45724	10.1611	10.8074	11.5358	10.4445	10.9532	lnc-JTB-1	NONCODE class 'Exonic', Ensembl Cross Reference: ENST00000484297 Name: RAB13//LNCipedia Identified Transcript	---	---	---	lnc-JTB-1:2	NonCoding	NONHSAT006570	---	---	---	chr1	-	153982745	153985362	1q21.3
TC0100004900.oe.1	0.0130382	up	2.49221	8.35324	6.52005	7.33773	6.90483	7.72511	9.09298	8.45247	9.30311	8.7845	7.79506	lnc-ARPC5-1	LNCipedia Identified Transcript//NONCODE class 'Linc', Ensembl Cross Reference: ENST00000602484 Name: RP1-127C7.6//N/A	ENST00000602484	---	---	lnc-ARPC5-1:1	NonCoding	NONHSAT008366	---	---	---	chr1	-	183620846	183621491	1q25.3
TC0200004354.oe.1	0.000466	up	2.49072	7.96467	7.11527	7.51454	7.63638	8.1412	8.72966	8.78564	9.546	9.02211	8.87144	lnc-CHRNA1-4	NONCODE class 'Exonic', Ensembl Cross Reference: ENST00000470752 Name: WIPF1//LNCipedia Identified Transcript//NONCODE class 'Exonic', Ensembl Cross Reference: ENST00000488830 Name: WIPF1//NONCODE class 'Exonic', Ensembl Cross Reference: ENST00000490887 Name: WIPF1	---	---	---	lnc-CHRNA1-4:1	NonCoding	NONHSAT075576//NONHSAT075578//NONHSAT075577	---	---	---	chr2	-	174623481	174634605	2q31.1
TC1500000146.oe.1	5.53e-05	up	2.49009	10.0503	9.64782	9.49065	9.74986	10.3052	11.2637	11.4313	10.9438	11.1664	11.0197	lnc-FAN1-6	NONCODE class 'Exonic', Ensembl Cross Reference: ENST00000558673 Name: KLF13//LNCipedia Identified Transcript	---	---	---	lnc-FAN1-6:1	NonCoding	NONHSAT041454	---	---	---	chr15	+	31376524	31377898	15q13.3
TC0300002776.oe.1	0.000139	up	2.4893	8.56239	8.5409	8.84686	8.4111	9.1348	10.2868	9.99866	9.89724	9.54885	10.3432	lnc-ADCY5-1	NONCODE class 'Linc', PubMed Identifer: PMID:22140575 mixed_Pred36321 , PubMed Identifer: PMID:22140575 brain_Pred30600//LNCipedia Identified Transcript	---	---	---	lnc-ADCY5-1:1	NonCoding	NONHSAT091524	---	---	---	chr3	-	123491557	123492833	3q21.1
TC0200001116.oe.1	0.000685	up	2.48872	6.60049	6.56188	6.85078	6.85947	6.81642	7.73416	7.869	8.9886	7.73427	7.94004	lnc-AC005035.1-2	LNCipedia Identified Transcript//NONCODE class 'Exonic', Ensembl Cross Reference: ENST00000477711 Name: MAP4K4	---	---	---	lnc-AC005035.1-2:1	NonCoding	NONHSAT072834	---	---	---	chr2	+	101866493	101867730	2q11.2
TC0500000471.oe.1	0.0411005	up	2.48646	9.21271	7.50267	8.2599	8.66056	8.8092	8.07818	9.80063	10.5501	10.0229	10.5636	lnc-GZMA-2	LNCipedia Identified Transcript//NONCODE class 'Antisense,Exonic', Ensembl Cross Reference: ENST00000511617 Name: GPX8//NONCODE class 'Antisense,Exonic', Ensembl Cross Reference: ENST00000502733 Name: GPX8//NONCODE class 'Antisense,Exonic', Ensembl Cross Reference: ENST00000505096 Name: GPX8	---	---	---	lnc-GZMA-2:1	NonCoding	NONHSAT101473//NONHSAT101471//NONHSAT101472	---	---	---	chr5	+	55160167	55164686	5q11.2
TC1100000881.oe.1	0.00923271	up	2.4845	6.20863	4.79837	5.43064	5.34896	5.79971	6.69179	6.48341	7.96701	6.82988	6.179	lnc-RCE1-2	NONCODE class 'Exonic', Ensembl Cross Reference: ENST00000526270 Name: C11orf80//LNCipedia Identified Transcript//NONCODE class 'Exonic', Ensembl Cross Reference: ENST00000533143 Name: C11orf80	---	---	---	lnc-RCE1-2:1	NonCoding	NONHSAT022355//NONHSAT022354	---	---	---	chr11	+	66815708	66828797	11q13.2
TC1000000487.oe.1	0.0311445	up	2.48435	5.69293	5.54111	5.7352	6.19951	5.35548	8.65009	6.53395	7.57426	6.1161	6.21417	lnc-ZNF22-4	NONCODE class 'Antisense,Exonic', Ensembl Cross Reference: ENST00000462822 Name: RASSF4//LNCipedia Identified Transcript	---	---	---	lnc-ZNF22-4:1	NonCoding	NONHSAT013050	---	---	---	chr10	+	44970169	44983912	10q11.21
TC1200001870.oe.1	0.00151624	up	2.48336	4.9355	5.67277	4.64156	5.19132	5.44665	6.37545	7.08291	6.34625	5.85037	6.79427	lnc-CLEC2A-3	NONCODE class 'Exonic', Ensembl Cross Reference: ENST00000540743 Name: CLEC2B//LNCipedia Identified Transcript//NONCODE class 'Exonic', Ensembl Cross Reference: ENST00000539028 Name: CLEC2B	---	---	---	lnc-CLEC2A-3:1	NonCoding	NONHSAT026851//NONHSAT026852	---	---	---	chr12	-	9856901	9869386	12p13.31
TC1200000400.oe.1	0.012088	up	2.4817	7.17703	5.95355	6.00241	5.6026	5.73296	6.70097	7.11382	8.43894	7.58173	7.18971	lnc-REP15-1	LNCipedia Identified Transcript//NONCODE class 'Linc', Ensembl Cross Reference: ENST00000418882 Name: RP11-1060J15.5	---	---	---	lnc-REP15-1:1	NonCoding	NONHSAT027450	---	---	---	chr12	+	27702338	27702906	12p11.22
TC2100000104.oe.1	0.000887	up	2.48064	3.56771	4.13843	3.75157	3.41012	3.84541	5.12359	4.41741	5.79506	5.05985	4.87088	lnc-CHODL-8	LNCipedia Identified Transcript - Alternate transcript name(s): NONHSAT081371, ucscGeneNc_uc002ylg_1	---	---	---	lnc-CHODL-8:1	NonCoding	---	---	---	---	chr21	+	21020490	21038400	21q21.1
TC0700001720.oe.1	0.00193939	up	2.47836	14.6593	13.5639	13.4103	13.3391	13.8785	15.2801	14.9183	15.6011	14.8992	14.6994	lnc-ACTB-2	LNCipedia Identified Transcript//NONCODE class 'Exonic', Ensembl Cross Reference: ENST00000464611 Name: ACTB//NONCODE class 'Exonic'	---	---	---	lnc-ACTB-2:1	NonCoding	NONHSAT118924//NONHSAT118923	---	---	---	chr7	-	5527151	5528204	7p22.1
TC2200000010.oe.1	0.000278	up	2.47813	4.96521	4.39067	4.51565	4.40624	4.66948	6.10919	6.20047	6.17779	5.22189	5.78414	NONHSAG033144//LL22NC03-N64E9.1//lnc-AP000525.1-4	NONCODE class 'Linc', Ensembl Cross Reference: ENST00000603308 Name: LL22NC03-N64E9.1//LNCipedia Identified Transcript//N/A	ENST00000603308.1//ENST00000603308	---	---	lnc-AP000525.1-4:1	NonCoding	NONHSAT083089	---	---	---	chr22	+	15796959	15798346	22q11.1
TC0400002520.oe.1	0.00609287	up	2.47768	9.24289	7.7907	8.09192	8.37483	8.55386	9.25414	9.58256	10.3604	10.2772	9.12485	lnc-SLC10A7-6	LNCipedia Identified Transcript//NONCODE class 'Exonic', Ensembl Cross Reference: ENST00000508995 Name: ZNF827	---	---	---	lnc-SLC10A7-6:1	NonCoding	NONHSAT098646	---	---	---	chr4	-	145870301	145892415	4q31.21
TC1400001287.oe.1	0.000337	up	2.47764	8.727	8.22122	8.3431	8.20871	8.7642	10.0464	9.30296	10.3099	9.62095	9.5288	lnc-EAPP-3	NONCODE class 'Exonic', Ensembl Cross Reference: ENST00000555541 Name: SNX6//LNCipedia Identified Transcript	---	---	---	lnc-EAPP-3:1	NonCoding	NONHSAT036334	---	---	---	chr14	-	34575591	34586316	14q13.1
TC0300000430.oe.1	0.000852	up	2.47452	5.91889	5.54554	5.37376	5.60825	6.22508	7.35853	6.92132	7.28862	7.34234	6.29644	lnc-CLEC3B-1	LNCipedia Identified Transcript - Alternate transcript name(s): l_2360_chr3:45074279-45084878_76bGuttman_hLF	---	---	---	lnc-CLEC3B-1:1	NonCoding	---	---	---	---	chr3	+	45032788	45043386	3p21.31
TC1400001642.oe.1	0.00486185	up	2.47326	11.6347	10.3771	10.6643	10.2664	11.2329	11.7963	11.8729	12.9497	12.2404	11.8481	lnc-ZFP36L1-4	LNCipedia Identified Transcript//NONCODE class 'Exonic'	---	---	---	lnc-ZFP36L1-4:1	NonCoding	NONHSAT037498	---	---	---	chr14	-	68879954	68880912	14q24.1
TC0Y00000012.oe.1	0.0159754	up	2.47274	7.64281	7.01642	7.54812	7.07958	8.0352	7.24555	9.32061	9.04305	9.02035	9.22313	lnc-RPS4Y1-11	LNCipedia Identified Transcript - Alternate transcript name(s): NR_003254//NONCODE Identified Transcript//LNCipedia Identified Transcript//NONCODE class 'Antisense'	---	---	---	lnc-RPS4Y1-11:1	NonCoding	NONHSAT139288//NONHSAT139287	---	---	---	chrY	+	2752296	2787634	Yp11.2
TC0100005021.oe.1	0.0002	up	2.4713	5.2469	5.02249	4.98433	5.47092	5.66327	6.20703	6.40338	6.75368	6.45413	7.09606	lnc-PTPN7-3	NONCODE class 'Exonic', Ensembl Cross Reference: ENST00000460852 Name: UBE2T//LNCipedia Identified Transcript	---	---	---	lnc-PTPN7-3:1	NonCoding	NONHSAT008813	---	---	---	chr1	-	202333010	202335818	1q32.1
TC1200000399.oe.1	0.0226027	up	2.47038	7.34204	5.77317	5.32841	5.94069	6.0676	6.88321	7.17381	8.57612	7.49826	6.84415	RP11-1060J15.9	N/A	ENST00000619202.1	---	---	---	NonCoding	---	---	---	---	chr12	+	27700066	27700574	12p11.22
TC1100002111.oe.1	0.00726141	up	2.46896	5.17908	5.72089	5.59167	5.05187	5.37208	5.38501	7.05171	6.71053	7.37637	6.91148	lnc-SLC1A2-3	LNCipedia Identified Transcript//NONCODE class 'Exonic', Ensembl Cross Reference: ENST00000531219 Name: PAMR1	---	---	---	lnc-SLC1A2-3:1	NonCoding	NONHSAT018792	---	---	---	chr11	-	35434568	35436225	11p13
TC1300000571.oe.1	0.00131108	up	2.46324	5.49639	6.22378	6.15958	5.38173	6.01389	7.00415	7.14418	7.00983	6.69608	7.92394	lnc-AL359392.1-3	NONCODE class 'Exonic', Ensembl Cross Reference: ENST00000467686 Name: LMO7//LNCipedia Identified Transcript	---	---	---	lnc-AL359392.1-3:1	NonCoding	NONHSAT034373	---	---	---	chr13	+	75854949	75856676	13q22.2
TC1300000888.oe.1	0.0227607	up	2.46263	7.86454	7.31516	6.65063	6.91125	7.19239	7.96529	8.15944	10.1241	8.27446	7.91172	lnc-GRK1-1	LNCipedia Identified Transcript//NONCODE class 'Exonic', Ensembl Cross Reference: ENST00000483678 Name: TMEM255B	---	---	---	lnc-GRK1-1:1	NonCoding	NONHSAT035376	---	---	---	chr13	+	113766164	113769815	13q34
TC1800000464.oe.1	0.00347228	up	2.46213	7.92461	9.01352	9.07676	8.72611	8.92686	10.7043	9.97819	10.3826	9.33989	9.76239	lnc-ELAC1-1	NONCODE class 'Exonic', Ensembl Cross Reference: ENST00000591925 Name: ME2//LNCipedia Identified Transcript	---	---	---	lnc-ELAC1-1:1	NonCoding	NONHSAT059285	---	---	---	chr18	+	50940130	50947154	18q21.2
TC0500002128.oe.1	0.00726086	up	2.45997	12.1595	11.1847	11.7437	11.6797	12.7931	13.5451	12.8874	13.9627	13.0746	12.584	lnc-FYB-2	LNCipedia Identified Transcript//NONCODE class 'Exonic', Ensembl Cross Reference: ENST00000502879 Name: DAB2	---	---	---	lnc-FYB-2:1	NonCoding	NONHSAT101122	---	---	---	chr5	-	39374745	39376042	5p13.1
TC0700002632.oe.1	0.00187252	up	2.45696	6.76483	7.13581	7.08478	6.96904	7.10367	8.8071	8.24305	8.93508	7.37534	8.18191	lnc-IMMP2L-3	LNCipedia Identified Transcript//NONCODE class 'Exonic', Ensembl Cross Reference: ENST00000464338 Name: DOCK4	---	---	---	lnc-IMMP2L-3:1	NonCoding	NONHSAT122773	---	---	---	chr7	-	111778327	111788920	7q31.1
TC0100005452.oe.1	0.00539987	up	2.45688	8.56356	8.91775	9.48838	9.53135	9.4081	11.3692	9.93966	10.8479	9.83822	10.3983	lnc-GNG4-8	LNCipedia Identified Transcript//NONCODE class 'Exonic', Ensembl Cross Reference: ENST00000461526 Name: LYST	---	---	---	lnc-GNG4-8:1	NonCoding	NONHSAT010376	---	---	---	chr1	-	235737990	235744032	1q42.3
TC1400000353.oe.1	0.00959221	up	2.45411	9.43974	8.01495	8.19762	7.37831	8.65146	9.48109	9.57318	10.2758	9.55152	9.27647	lnc-ARF6-3	LNCipedia Identified Transcript//NONCODE class 'Exonic'	---	---	---	lnc-ARF6-3:1	NonCoding	NONHSAT036756	---	---	---	chr14	+	49894417	49897054	14q21.3
TC0800001669.oe.1	0.0215174	up	2.45371	9.27243	8.8554	9.01719	8.64876	8.56919	8.61101	10.3782	11.2206	10.6224	10.0055	OTTHUMG00000165098//RP11-350N15.3//lnc-FGFR1-1//NONHSAG050008	LNCipedia Identified Transcript - Alternate transcript name(s): RP11-350N15.3-001//NONCODE class 'Antisense', External ID: TCONS_00036735 Name: RP11-350N15.3, Ensembl Cross Reference: ENST00000533301 Name: RP11-350N15.3//LNCipedia Identified Transcript//N/A	ENST00000533301.1//ENST00000533301	---	OTTHUMT00000381802.1	lnc-FGFR1-1:2//lnc-FGFR1-1:1	NonCoding	NONHSAT126093	---	---	---	chr8	-	38400536	38402392	8p11.23
TC0200002987.oe.1	0.0389265	up	2.45064	6.20809	6.24596	6.14855	6.45315	6.43825	9.60989	7.17454	6.67144	7.03264	7.47129	lnc-ATL2-4	LNCipedia Identified Transcript//NONCODE class 'Exonic', Ensembl Cross Reference: ENST00000462864 Name: CYP1B1	---	---	---	lnc-ATL2-4:1	NonCoding	NONHSAT070157	---	---	---	chr2	-	38071176	38076154	2p22.2
TC1400000521.oe.1	0.00413252	up	2.44973	13.2119	11.9563	11.9875	12.0386	12.4507	12.9778	14.1441	14.1035	13.4857	13.3972	lnc-MNAT1-8	NONCODE class 'Exonic', Ensembl Cross Reference: ENST00000554498 Name: SLC38A6//LNCipedia Identified Transcript//NONCODE class 'Exonic', Ensembl Cross Reference: ENST00000556938 Name: SLC38A6	---	---	---	lnc-MNAT1-8:1	NonCoding	NONHSAT037240//NONHSAT037241	---	---	---	chr14	+	61051815	61052464	14q23.1
TC0300002451.oe.1	0.000142	up	2.44842	5.32967	5.40905	5.1434	5.29924	4.99835	6.81921	6.67073	6.92519	6.18585	6.03797	lnc-FAM107A-4	LNCipedia Identified Transcript//NONCODE class 'Exonic', Ensembl Cross Reference: ENST00000459888 Name: ACOX2	---	---	---	lnc-FAM107A-4:1	NonCoding	NONHSAT090133	---	---	---	chr3	-	58526505	58529206	3p14.3
TC1400000214.oe.1	0.00106459	up	2.44631	10.0827	9.90568	10.7695	10.3444	10.6399	12.066	11.5829	12.1275	11.1226	11.2962	RP11-671J11.5	N/A	ENST00000623080.1	---	---	---	NonCoding	---	---	---	---	chr14	+	34541044	34541714	14q13.1
TC0200000948.oe.1	0.00279637	up	2.44328	6.3906	5.2081	5.67816	5.28591	5.93007	7.45516	6.73908	7.17801	6.28538	7.27931	lnc-PLGLB2-2	LNCipedia Identified Transcript - Alternate transcript name(s): ENST00000502627	---	---	---	lnc-PLGLB2-2:1	NonCoding	---	---	---	---	chr2	+	87449518	87458989	2p11.2
TC2000001230.oe.1	0.0183884	up	2.44273	6.07272	5.64277	5.90264	5.43754	5.87431	8.36181	6.52233	7.77948	6.54208	6.16676	lnc-NEURL2-1//RP3-337O18.9	LNCipedia Identified Transcript//N/A	ENST00000607703.1//ENST00000607703	---	---	lnc-NEURL2-1:1	NonCoding	---	---	---	---	chr20	-	45892694	45893419	20q13.12
TC2200001096.oe.1	0.00508637	up	2.44112	4.0732	4.39354	4.43709	4.43277	4.21179	6.56872	5.18387	6.1494	4.7855	5.29863	lnc-CARD10-3	LNCipedia Identified Transcript//NONCODE class 'Exonic', Ensembl Cross Reference: ENST00000489515 Name: MFNG	---	---	---	lnc-CARD10-3:1	NonCoding	NONHSAT086601	---	---	---	chr22	-	37469068	37472724	22q13.1
TC0900000950.oe.1	0.000192	up	2.43919	6.81137	6.81195	6.54916	6.52632	6.95111	8.64069	7.67142	8.15246	7.94576	7.6716	lnc-SLC31A1-3	LNCipedia Identified Transcript//NONCODE class 'Exonic'	---	---	---	lnc-SLC31A1-3:1	NonCoding	NONHSAT134321	---	---	---	chr9	+	113157722	113162914	9q32
TC1800000113.oe.1	0.0208469	up	2.43628	4.86484	4.77733	5.02186	5.21264	5.3106	5.35281	5.95929	7.94199	5.99205	6.36452	lnc-CCDC165-1	NONCODE class 'Exonic', Ensembl Cross Reference: ENST00000581670 Name: SOGA2//LNCipedia Identified Transcript	---	---	---	lnc-CCDC165-1:1	NonCoding	NONHSAT057188	---	---	---	chr18	+	8829923	8832778	18p11.22
TSUnmapped00000970.oe.1	0.00102074	up	2.43276	8.00135	7.91855	7.16738	7.57611	7.59288	9.59843	9.06644	8.64932	8.98919	8.36587	LINC01296	LNCipedia Identified Transcript	---	---	---	LINC01296:31	NonCoding	---	---	---	---	---	---	---	---	---
TC1500001299.oe.1	0.0482961	up	2.4317	4.57367	4.80692	4.77898	4.36846	4.60417	7.91756	5.34187	6.13274	4.80974	5.34012	NONHSAG016469//RP11-12O16.1//lnc-RP11-632K20.1.1-6	LNCipedia Identified Transcript//NONCODE class 'Sense No Exonic'//N/A	ENST00000623516.1	---	---	lnc-RP11-632K20.1.1-6:1	NonCoding	NONHSAT041540	---	---	---	chr15	-	33105758	33106236	15q13.3
TC0200001553.oe.1	0.0187138	up	2.43149	4.71763	3.87812	4.01971	4.04552	3.88911	6.57474	5.085	5.02725	4.25265	6.01963	lnc-KYNU-12	NONCODE class 'Exonic', Ensembl Cross Reference: ENST00000549060 Name: ARHGAP15//LNCipedia Identified Transcript	---	---	---	lnc-KYNU-12:1	NonCoding	NONHSAT074746	---	---	---	chr2	+	143706411	143768348	2q22.3
TC0900001826.oe.1	0.00554328	up	2.42958	10.5459	8.89701	9.94163	9.95361	10.2395	10.8642	11.6658	11.5836	11.2166	10.6511	lnc-C9orf57-2	NONCODE class 'Linc', Ensembl Cross Reference: ENST00000423240 Name: HSPB1P1//LNCipedia Identified Transcript	---	---	---	lnc-C9orf57-2:1	NonCoding	NONHSAT131842	---	---	---	chr9	-	72007881	72008136	9q21.13
TC1100000322.oe.1	0.011574	up	2.42854	5.08397	4.58728	4.46445	4.70284	5.03391	4.77963	5.71105	6.88384	6.29612	6.60225	lnc-SLC6A5-2	LNCipedia Identified Transcript//NONCODE class 'Exonic', Ensembl Cross Reference: ENST00000528495 Name: NELL1	---	---	---	lnc-SLC6A5-2:1	NonCoding	NONHSAT018371	---	---	---	chr11	+	20927025	20928444	11p15.1
TC0200000394.oe.1	0.00751868	up	2.4282	13.7506	12.6924	12.6979	12.8328	12.7085	13.2832	14.7219	14.6346	14.6993	13.7427	lnc-RASGRP3-11	LNCipedia Identified Transcript//NONCODE class 'Exonic', Ensembl Cross Reference: ENST00000489740 Name: LTBP1	---	---	---	lnc-RASGRP3-11:1	NonCoding	NONHSAT070009	---	---	---	chr2	+	33301632	33317940	2p22.3
TC1100003168.oe.1	0.00838452	up	2.42806	5.8899	6.17886	6.25617	6.02166	6.67989	6.50895	7.30871	8.6458	7.38044	7.58162	lnc-FEZ1-1	NONCODE class 'Exonic', Ensembl Cross Reference: ENST00000530096 Name: FEZ1//LNCipedia Identified Transcript//NONCODE class 'Exonic', Ensembl Cross Reference: ENST00000528863 Name: FEZ1//NONCODE class 'Exonic', Ensembl Cross Reference: ENST00000532778 Name: FEZ1//NONCODE class 'Exonic', Ensembl Cross Reference: ENST00000526507 Name: FEZ1	---	---	---	lnc-FEZ1-1:1	NonCoding	NONHSAT024954//NONHSAT024953//NONHSAT024952//NONHSAT024951	---	---	---	chr11	-	125445750	125454357	11q24.2
TC1100000769.oe.1	0.0175498	up	2.42681	5.16274	5.23206	5.1388	4.78445	4.95391	7.83107	6.25445	6.484	5.69651	5.40125	lnc-NUDT22-2	LNCipedia Identified Transcript//NONCODE class 'Exonic', Ensembl Cross Reference: ENST00000540554 Name: FERMT3	---	---	---	lnc-NUDT22-2:1	NonCoding	NONHSAT021952	---	---	---	chr11	+	64220835	64223120	11q13.1
TC0800002098.oe.1	0.00957745	up	2.42644	7.80633	8.39391	9.22431	8.36514	9.3789	9.42877	9.27482	10.4299	10.3666	10.0627	lnc-TMEM55A-5	NONCODE class 'Exonic', PubMed Identifer: PMID:22140575 brain_Pred39085//LNCipedia Identified Transcript	---	---	---	lnc-TMEM55A-5:1	NonCoding	NONHSAT127684	---	---	---	chr8	-	91956502	91957933	8q21.3
TC0200004424.oe.1	0.00274244	up	2.42465	10.033	9.77386	9.89604	9.9819	10.104	11.6806	10.7319	12.1763	10.8378	10.751	lnc-CERKL-7	LNCipedia Identified Transcript//NONCODE class 'Linc', Ensembl Cross Reference: ENST00000434913 Name: FTH1P20	---	---	---	lnc-CERKL-7:1	NonCoding	NONHSAT075851	---	---	---	chr2	-	180872867	180873414	2q31.3
TC1600000865.oe.1	0.0214829	up	2.42349	4.78093	6.006	6.27017	6.22236	5.57771	8.01477	6.25451	7.77066	6.55169	6.65096	RP11-212I21.4//lnc-CAPNS2-1//NONHSAG019513//OTTHUMG00000177970	LNCipedia Identified Transcript - Alternate transcript name(s): RP11-212I21.4-001//NONCODE class 'Sense No Exonic', External ID: TCONS_00013695 Name: RP11-212I21.4, Ensembl Cross Reference: ENST00000576365 Name: RP11-212I21.4//N/A	ENST00000576365.1//ENST00000576365	---	OTTHUMT00000440031.1	lnc-CAPNS2-1:1	NonCoding	NONHSAT142638	---	---	---	chr16	+	55538200	55542027	16q12.2
TC0300001263.oe.1	0.000351	up	2.42265	10.7931	10.5403	10.7179	10.6199	10.8107	11.6799	12.2292	12.1065	11.3328	12.5164	lnc-GRK7-2	NONCODE class 'Exonic', Ensembl Cross Reference: ENST00000482635 Name: ATP1B3//NONCODE class 'Exonic', Ensembl Cross Reference: ENST00000484727 Name: ATP1B3//NONCODE class 'Exonic', Ensembl Cross Reference: ENST00000486782 Name: ATP1B3//LNCipedia Identified Transcript	---	---	---	lnc-GRK7-2:1	NonCoding	NONHSAT092450//NONHSAT092453//NONHSAT092452	---	---	---	chr3	+	141903728	141925985	3q23
TC0500001390.oe.1	0.00665971	up	2.41868	5.49931	4.71966	4.54633	4.49794	4.80156	6.89541	5.73451	6.73432	5.48013	5.59153	lnc-AFAP1L1-3	LNCipedia Identified Transcript//NONCODE class 'Exonic', Ensembl Cross Reference: ENST00000515796 Name: ABLIM3	---	---	---	lnc-AFAP1L1-3:1	NonCoding	NONHSAT104481	---	---	---	chr5	+	149183549	149200620	5q32
TC1100002883.oe.1	0.0239998	up	2.41775	5.03705	4.85426	5.22229	5.02114	4.67807	5.97986	6.86171	6.20066	4.74256	7.39635	lnc-PGR-5	LNCipedia Identified Transcript//NONCODE class 'Exonic', Ensembl Cross Reference: ENST00000532184 Name: TRPC6	---	---	---	lnc-PGR-5:1	NonCoding	NONHSAT023857	---	---	---	chr11	-	101453641	101455577	11q22.1
TC1600002338.oe.1	0.00433887	up	2.41715	7.10119	6.34361	6.1445	6.93926	6.52956	8.55958	7.35536	8.50341	7.3566	7.64969	lnc-ZDHHC1-2	LNCipedia Identified Transcript//NONCODE class 'Exonic'	---	---	---	lnc-ZDHHC1-2:1	NonCoding	NONHSAT143126	---	---	---	chr16	-	67438503	67438997	16q22.1
TC1500000968.oe.1	0.0100682	up	2.41669	8.81231	7.78917	8.32127	7.94598	9.09233	10.4263	9.16117	10.3052	9.27671	9.15684	RP11-617F23.2//NONHSAG017855//lnc-SEMA4B-6	LNCipedia Identified Transcript//NONCODE class 'Sense No Exonic'//N/A	ENST00000614119.1	---	---	lnc-SEMA4B-6:1	NonCoding	NONHSAT048357	---	---	---	chr15	+	90024955	90026003	15q26.1
TC1400001908.oe.1	0.00210983	up	2.41657	9.11201	8.0441	8.66398	9.06701	8.8094	10.6493	9.71121	10.3765	9.74721	9.5771	lnc-ITPK1-3	LNCipedia Identified Transcript//NONCODE class 'Exonic', Ensembl Cross Reference: ENST00000556790 Name: LGMN	---	---	---	lnc-ITPK1-3:1	NonCoding	NONHSAT039327	---	---	---	chr14	-	92704276	92704905	14q32.12
TC1500001570.oe.1	0.00095	up	2.41595	7.55038	7.34522	7.43573	7.31366	7.51488	9.02369	7.98203	9.37928	8.78747	8.35036	lnc-MYO5C-2	NONCODE Identified Transcript//LNCipedia Identified Transcript//NONCODE class 'Exonic'	---	---	---	lnc-MYO5C-2:1	NonCoding	NONHSAT043934//NONHSAT043930//NONHSAT043932//NONHSAT043931	---	---	---	chr15	-	52330455	52351481	15q21.2
TC0500001887.oe.1	0.0199199	up	2.41514	4.05811	4.40632	4.03699	4.17795	4.83474	5.42674	4.65919	6.99516	4.91201	5.88152	CTD-2201E9.3	N/A	ENST00000624030.1	---	---	---	NonCoding	---	---	---	---	chr5	-	9498401	9498775	5p15.31
TC1100000724.oe.1	0.0192414	up	2.41445	7.00825	6.20438	5.59011	6.50073	5.82434	6.12015	7.96038	7.98664	7.49171	7.92741	lnc-FEN1-4	NONCODE class 'Exonic', Ensembl Cross Reference: ENST00000522359 Name: FADS2//LNCipedia Identified Transcript	---	---	---	lnc-FEN1-4:1	NonCoding	NONHSAT021717	---	---	---	chr11	+	61861973	61865319	11q12.2
TC1100002914.oe.1	0.0312196	up	2.41171	7.9669	8.33699	8.94182	8.45494	9.40055	11.4652	9.21468	10.0289	9.39439	9.34826	lnc-CASP5-4	NONCODE class 'Exonic', Ensembl Cross Reference: ENST00000531333 Name: CASP4//LNCipedia Identified Transcript	---	---	---	lnc-CASP5-4:1	NonCoding	NONHSAT023948	---	---	---	chr11	-	104949661	104968639	11q22.3
TC1300001259.oe.1	0.00579177	up	2.41116	9.52945	9.37058	10.0284	9.02216	10.2484	10.7823	10.4082	11.6993	10.3672	11.2906	lnc-SPRYD7-4	LNCipedia Identified Transcript - Alternate transcript name(s): l_842_chr13:50662771-50664021_testes	---	---	---	lnc-SPRYD7-4:1	NonCoding	---	---	---	---	chr13	-	50088636	50089901	13q14.2
TC0100003261.oe.1	0.0374268	up	2.41003	10.5083	7.5191	8.72614	8.65059	8.88367	10.2055	9.91301	10.4825	10.4678	9.56425	lnc-USP48-6	LNCipedia Identified Transcript//NONCODE class 'Exonic', Ensembl Cross Reference: ENST00000480900 Name: HSPG2	---	---	---	lnc-USP48-6:1	NonCoding	NONHSAT001442	---	---	---	chr1	-	21877514	21879074	1p36.12
TC0200004283.oe.1	0.00825015	up	2.41	10.3632	9.1472	9.04345	8.8376	9.65383	9.82025	11.0904	11.1591	10.5772	10.7434	lnc-C2orf77-5	NONCODE class 'Exonic', Ensembl Cross Reference: ENST00000490590 Name: FASTKD1//LNCipedia Identified Transcript//NONCODE class 'Exonic', Ensembl Cross Reference: ENST00000495505 Name: FASTKD1//NONCODE class 'Exonic', Ensembl Cross Reference: ENST00000488516 Name: FASTKD1//NONCODE class 'Exonic', Ensembl Cross Reference: ENST00000488951 Name: FASTKD1	---	---	---	lnc-C2orf77-5:1	NonCoding	NONHSAT075354//NONHSAT075355//NONHSAT075357//NONHSAT075353	---	---	---	chr2	-	169529755	169540124	2q31.1
TC1500000435.oe.1	0.00561828	up	2.40862	8.04513	7.38047	8.6654	7.09427	8.27241	9.51002	9.15272	8.71188	8.82903	9.59506	lnc-TMOD3-2	LNCipedia Identified Transcript//NONCODE class 'Exonic'	---	---	---	lnc-TMOD3-2:1	NonCoding	NONHSAT043881	---	---	---	chr15	+	51815263	51815911	15q21.2
TC0400002179.oe.1	0.0003	up	2.40859	5.0776	5.20967	5.39806	4.69407	5.30074	5.95763	6.14541	6.92518	6.39965	6.59321	lnc-HPGDS-5	NONCODE class 'Exonic', Ensembl Cross Reference: ENST00000506331 Name: HPGDS//LNCipedia Identified Transcript//NONCODE class 'Exonic', Ensembl Cross Reference: ENST00000514774 Name: HPGDS	---	---	---	lnc-HPGDS-5:2	NonCoding	NONHSAT097445//NONHSAT097446	---	---	---	chr4	-	94303763	94342876	4q22.3
TC0100005072.oe.1	5.04e-05	up	2.40845	10.0877	9.90956	10.4752	9.72399	10.3275	11.4456	11.5315	11.2509	11.5435	11.0931	lnc-SLC45A3-4	LNCipedia Identified Transcript//NONCODE class 'Exonic', PubMed Identifer: PMID:22140575 mixed_Pred4446 , PubMed Identifer: PMID:22140575 brain_Pred3663	---	---	---	lnc-SLC45A3-4:1	NonCoding	NONHSAT009016	---	---	---	chr1	-	205607945	205609670	1q32.1
TC0500001886.oe.1	0.0319516	up	2.40793	4.43878	4.30071	5.1524	4.61488	4.10859	6.37152	5.24146	7.30471	4.91113	5.12553	lnc-TAS2R1-9	NONCODE Identified Transcript//LNCipedia Identified Transcript//NONCODE class 'Sense No Exonic'	---	---	---	lnc-TAS2R1-9:1	NonCoding	NONHSAT100355//NONHSAT100356	---	---	---	chr5	-	9361753	9362276	5p15.31
TC1100003047.oe.1	0.00215589	up	2.40578	10.3158	10.1431	10.1546	9.52828	10.8292	11.0043	11.3174	12.0184	11.8118	11.1517	lnc-AP000892.4.1-4	LNCipedia Identified Transcript//NONCODE class 'Exonic'	---	---	---	lnc-AP000892.4.1-4:1	NonCoding	NONHSAT024402	---	---	---	chr11	-	117290487	117291765	11q23.3
TC1200000941.oe.1	0.000278	up	2.40564	13.3817	12.5165	12.8576	12.7026	13.1653	13.8802	14.4465	14.4997	13.8707	14.2588	lnc-CCT2-1	LNCipedia Identified Transcript//NONCODE class 'Exonic', Ensembl Cross Reference: ENST00000550653 Name: CCT2	---	---	---	lnc-CCT2-1:1	NonCoding	NONHSAT029375	---	---	---	chr12	+	69599714	69601570	12q15
TC0200001204.oe.1	0.00208936	up	2.40389	11.874	10.5816	11.1512	10.8598	11.6453	12.4236	12.3541	13.0601	12.1702	12.4307	lnc-RANBP2-2	LNCipedia Identified Transcript//NONCODE class 'Exonic'	---	---	---	lnc-RANBP2-2:1	NonCoding	NONHSAT073110	---	---	---	chr2	+	108685522	108687241	2q12.3
TC1500000332.oe.1	0.0218573	up	2.40282	6.14916	5.63434	5.56454	5.51517	5.91279	6.12601	6.40433	8.34415	7.71784	6.5073	lnc-CKMT1B-1	LNCipedia Identified Transcript//NONCODE class 'Exonic'	---	---	---	lnc-CKMT1B-1:1	NonCoding	NONHSAT042087	---	---	---	chr15	+	43527596	43528110	15q15.3
TC2100000767.oe.1	0.0478772	up	2.40233	12.7306	10.2294	10.3594	10.1957	11.2522	12.6054	11.7866	12.4245	12.7608	11.512	lnc-RCAN1-5	LNCipedia Identified Transcript//NONCODE class 'Exonic', Ensembl Cross Reference: ENST00000467577 Name: RUNX1//NONCODE class 'Exonic', Ensembl Cross Reference: ENST00000469087 Name: RUNX1	---	---	---	lnc-RCAN1-5:1	NonCoding	NONHSAT081894//NONHSAT081893	---	---	---	chr21	-	34832961	34859578	21q22.12
TC1200001809.oe.1	0.0102302	up	2.40175	9.29512	8.67641	9.77606	9.42299	10.162	11.2532	10.0582	11.0735	11.2538	10.0143	lnc-RBP5-5	NONCODE class 'Exonic', Ensembl Cross Reference: ENST00000543851 Name: C1R//LNCipedia Identified Transcript	---	---	---	lnc-RBP5-5:1	NonCoding	NONHSAT026224	---	---	---	chr12	-	7089648	7090358	12p13.31
TC1900001923.oe.1	0.00374456	up	2.40162	5.50537	5.1249	5.66	5.09515	5.51633	7.68629	6.3465	6.8681	6.09794	6.22298	lnc-PLVAP-4	LNCipedia Identified Transcript//NONCODE class 'Exonic', Ensembl Cross Reference: ENST00000527220 Name: BST2//NONCODE class 'Exonic', Ensembl Cross Reference: ENST00000533098 Name: BST2	---	---	---	lnc-PLVAP-4:1	NonCoding	NONHSAT062869//NONHSAT062870	---	---	---	chr19	-	17403241	17405530	19p13.11
TC1100001414.oe.1	0.022867	up	2.39943	13.5165	11.3773	11.08	11.4574	11.6194	12.9278	12.8742	13.1362	13.4809	12.9448	lnc-ZBTB16-1	LNCipedia Identified Transcript//NONCODE class 'Sense No Exonic'	---	---	---	lnc-ZBTB16-1:1	NonCoding	NONHSAT024276	---	---	---	chr11	+	114306709	114309729	11q23.2
TC0300000367.oe.1	0.0286098	up	2.396	7.25502	5.98976	7.04702	6.58551	6.81005	7.35262	7.18095	9.53969	8.13483	7.78241	OTTHUMG00000156011//RP11-761N21.1//lnc-ZNF621-2//XLOC_002622//NONHSAG034841	NONCODE class 'Linc', External ID: TCONS_00025998 Name: RP11-761N21.1, Ensembl Cross Reference: ENST00000412811 Name: RP11-761N21.1//LNCipedia Identified Transcript - Alternate transcript name(s): RP11-761N21.1-001//N/A//gene_id XLOC_002622; transcript_id TCONS_00005514; oId ENST00000412811; linc_name linc-CTNNB1-2; tss_id TSS4170; class_code u; gene_name linc-CTNNB1-2;	ENST00000412811//ENST00000412811.1	---	OTTHUMT00000342724.1	lnc-ZNF621-2:1	NonCoding	NONHSAT089182	TCONS_00005514	---	---	chr3	+	40766207	40862626	3p22.1
TC0200004102.oe.1	0.000319	up	2.395	5.46865	5.24506	5.64661	5.33656	5.73128	7.32866	6.3894	7.04502	6.39126	6.57393	lnc-ZEB2-1	zinc finger E-box binding homeobox 2 (ZEB2), transcript variant 3, non-coding RNA.//NONCODE class 'Exonic', Ensembl Cross Reference: ENST00000475115 Name: ZEB2//NONCODE class 'Exonic', External ID: TCONS_00021676//NONCODE class 'Exonic', External ID: TCONS_00022501//gene_id XLOC_002344; transcript_id TCONS_00004467; oId TCONS_00007944; linc_name linc-ZEB2-7; tss_id TSS3723; class_code .; gene_nam…	---	---	---	lnc-ZEB2-1:1	NonCoding	NONHSAT074783//NONHSAT074767//NONHSAT074762//NONHSAT074784//NONHSAT074771//NONHSAT074782//NONHSAT074768//NONHSAT074769//NONHSAT074759//NONHSAT074763//NONHSAT074770//NONHSAT074760//NONHSAT074766	TCONS_00004467//TCONS_00004466//TCONS_00004465	---	NR_033258	chr2	-	144429769	144524661	2q22.3
TC0400002238.oe.1	0.0264475	up	2.39285	6.9764	7.08228	7.63673	6.55649	6.90421	8.49828	9.77394	7.86852	7.17812	8.1309	lnc-BDH2-2	NONCODE class 'Exonic', Ensembl Cross Reference: ENST00000515424 Name: SLC9B2//LNCipedia Identified Transcript//NONCODE class 'Exonic', Ensembl Cross Reference: ENST00000505838 Name: SLC9B2	---	---	---	lnc-BDH2-2:1	NonCoding	NONHSAT097621//NONHSAT097622	---	---	---	chr4	-	103048591	103076336	4q24
TC1300001550.oe.1	7.13e-05	up	2.39237	6.62636	6.61133	6.60897	6.12769	6.60625	7.74637	7.94051	8.19222	7.60111	7.39262	lnc-SLC15A1-3	LNCipedia Identified Transcript - Alternate transcript name(s): l_907_chr13:99535821-99539229_liver	---	---	---	lnc-SLC15A1-3:1	NonCoding	---	---	---	---	chr13	-	98883568	98886976	13q32.3
TC0400000209.oe.1	0.000231	up	2.39196	4.7627	4.7151	4.32871	4.31239	4.39994	5.66437	5.33895	6.25352	5.47996	6.07301	lnc-CC2D2A-2	NONCODE class 'Exonic', Ensembl Cross Reference: ENST00000512144 Name: C1QTNF7//LNCipedia Identified Transcript//NONCODE class 'Exonic', Ensembl Cross Reference: ENST00000510958 Name: C1QTNF7	---	---	---	lnc-CC2D2A-2:1	NonCoding	NONHSAT095621//NONHSAT095620	---	---	---	chr4	+	15339988	15381867	4p15.32
TC1700003032.oe.1	0.000427	up	2.39122	8.65831	8.0375	8.69713	7.88913	8.9062	9.50168	9.70142	9.74233	9.99972	9.53185	lnc-SGSH-4	LNCipedia Identified Transcript//NONCODE class 'Exonic', Ensembl Cross Reference: ENST00000570837 Name: EIF4A3	---	---	---	lnc-SGSH-4:1	NonCoding	NONHSAT056344	---	---	---	chr17	-	80139686	80140476	17q25.3
TC1000001597.oe.1	0.0134938	up	2.39033	4.09164	4.23057	4.21289	3.97048	4.30246	6.7306	5.38628	5.5908	4.30434	5.08209	lnc-BEND7-3	LNCipedia Identified Transcript//NONCODE class 'Exonic', Ensembl Cross Reference: ENST00000492155 Name: FRMD4A//NONCODE class 'Exonic', Ensembl Cross Reference: ENST00000477221 Name: FRMD4A	---	---	---	lnc-BEND7-3:1	NonCoding	NONHSAT011527//NONHSAT011526	---	---	---	chr10	-	13692169	13707757	10p13
TC0100001837.oe.1	0.0029852	up	2.38592	5.62212	4.85906	5.60662	5.57048	5.29392	7.16139	6.53928	5.94724	6.2633	7.31371	lnc-PMF1-1	LNCipedia Identified Transcript//NONCODE class 'Exonic', Ensembl Cross Reference: ENST00000471413 Name: BGLAP	---	---	---	lnc-PMF1-1:1	NonCoding	NONHSAT006824	---	---	---	chr1	+	156242189	156243289	1q22
TC0600002603.oe.1	0.00129479	up	2.38589	7.34607	6.91317	7.19225	6.94069	7.37789	7.63041	8.64903	8.91854	8.08314	8.76161	lnc-BMP5-3	NONCODE class 'Exonic', Ensembl Cross Reference: ENST00000469682 Name: COL21A1//LNCipedia Identified Transcript	---	---	---	lnc-BMP5-3:1	NonCoding	NONHSAT113239	---	---	---	chr6	-	56125391	56126643	6p12.1
TC1100001829.oe.1	0.0073375	up	2.38583	8.30644	8.28437	8.03252	8.32936	8.53784	10.4767	9.00306	10.2494	9.27243	8.76138	lnc-TAF10-2	LNCipedia Identified Transcript//NONCODE class 'Exonic', Ensembl Cross Reference: ENST00000524924 Name: TPP1//NONCODE class 'Exonic', Ensembl Cross Reference: ENST00000532191 Name: TPP1	---	---	---	lnc-TAF10-2:1	NonCoding	NONHSAT017745//NONHSAT017744	---	---	---	chr11	-	6615216	6616104	11p15.4
TC0700000974.oe.1	0.0130062	up	2.38102	11.5149	9.98624	11.2289	11.159	11.4741	12.6082	12.3912	13.1114	11.4572	12.053	lnc-ARPC1B-1	NONCODE class 'Antisense,Exonic', Ensembl Cross Reference: ENST00000463078 Name: ARPC1B//LNCipedia Identified Transcript	---	---	---	lnc-ARPC1B-1:1	NonCoding	NONHSAT122231	---	---	---	chr7	+	99394042	99394801	7q22.1
TC0900001003.oe.1	0.00466306	up	2.37833	5.8837	5.96708	5.92178	5.7405	6.01722	8.34741	6.63984	7.24015	6.62105	6.93158	lnc-TRIM32-12	LNCipedia Identified Transcript//NONCODE class 'Exonic', Ensembl Cross Reference: ENST00000490685 Name: TLR4	---	---	---	lnc-TRIM32-12:1	NonCoding	NONHSAT134466	---	---	---	chr9	+	117708197	117708979	9q33.1
TC0200003822.oe.1	0.00144001	up	2.37817	5.73117	5.58701	4.95741	4.95664	5.53669	6.74503	6.33263	7.20075	5.99659	6.74317	RP11-803D5.1	N/A	ENST00000622940.1	---	---	---	NonCoding	---	---	---	---	chr2	-	111321433	111324812	2q13
TC0700000814.oe.1	0.00599491	up	2.37772	7.38751	6.38419	6.78167	6.59963	7.32593	8.8144	7.68039	8.67671	8.1441	7.41123	lnc-PTPN12-1	LNCipedia Identified Transcript - Alternate transcript name(s): FPKM1_group_29926_transcript_1//NONCODE class 'Linc', PubMed Identifer: PMID:23818866 FPKM1_group_29926_transcr	---	---	---	lnc-PTPN12-1:1	NonCoding	NONHSAT121667	---	---	---	chr7	+	77654944	77656519	7q11.23
TC2000000978.oe.1	0.0292043	up	2.37389	3.93463	3.93218	4.13	3.6948	4.132	6.89503	5.26945	5.14442	4.20731	4.54368	lnc-CD93-4	LNCipedia Identified Transcript - Alternate transcript name(s): NONHSAT079033//LNCipedia Identified Transcript - Alternate transcript name(s): refGeneNc_4391_NR_034149	---	---	---	lnc-CD93-4:1	NonCoding	---	---	---	---	chr20	-	23073068	23080636	20p11.21
TC0500002058.oe.1	0.0403823	up	2.37255	5.7443	5.04406	5.42418	5.05598	5.74164	5.02405	7.0276	7.85426	7.16252	6.17392	NONHSAG040146//CTD-2066L21.2//XLOC_004772//OTTHUMG00000162005//lnc-ADAMTS12-4	LNCipedia Identified Transcript - Alternate transcript name(s): CTD-2066L21.2-001//gene_id XLOC_004772; transcript_id TCONS_00009631; oId ENST00000511840; linc_name linc-ZFR-3; tss_id TSS7684; class_code u; gene_name linc-ZFR-3;//N/A//NONCODE class 'Linc', External ID: TCONS_00030547 Name: CTD-2066L21.2, Ensembl Cross Reference: ENST00000511840 Name: CTD-2066L21.2	ENST00000511840.1//ENST00000511840	---	OTTHUMT00000366716.1	lnc-ADAMTS12-4:1	NonCoding	NONHSAT100942	TCONS_00009631	---	---	chr5	-	33011322	33017607	5p13.3
TC0X00001929.oe.1	0.0275912	up	2.36483	6.68351	6.11491	6.61804	6.85778	6.94765	9.46076	7.28922	8.23866	7.26417	7.17775	lnc-CTAG2-1	NONCODE class 'Exonic', Ensembl Cross Reference: ENST00000475685 Name: GAB3//LNCipedia Identified Transcript	---	---	---	lnc-CTAG2-1:2	NonCoding	NONHSAT139207	---	---	---	chrX	-	154678290	154696092	Xq28
TC0900002164.oe.1	0.00490922	up	2.35848	5.49232	5.11778	5.96715	4.99598	5.51051	7.57402	6.06311	6.94934	6.26379	6.42275	lnc-PTBP3-6	NONCODE class 'Exonic', Ensembl Cross Reference: ENST00000529933 Name: SUSD1//LNCipedia Identified Transcript	---	---	---	lnc-PTBP3-6:1	NonCoding	NONHSAT134000	---	---	---	chr9	-	112080074	112104958	9q31.3
TC0700000675.oe.1	0.000434	up	2.35429	7.98102	8.17262	8.2241	7.46794	7.556	9.12686	8.61521	9.51765	9.05523	9.26319	lnc-CRCP-1	LNCipedia Identified Transcript - Alternate transcript name(s): l_3431_chr7:65761393-65766051_brain	---	---	---	lnc-CRCP-1:1	NonCoding	---	---	---	---	chr7	+	66296407	66301064	7q11.21
TC1000001893.oe.1	0.0306098	up	2.35363	4.14914	3.64672	3.99645	4.01225	3.80397	4.8834	3.96192	6.49168	5.92727	4.5187	lnc-FRMPD2-4	NONCODE class 'Sense No Exonic', Ensembl Cross Reference: ENST00000412463 Name: RP11-541M12.3//LNCipedia Identified Transcript	---	---	---	lnc-FRMPD2-4:1	NonCoding	NONHSAT013275	---	---	---	chr10	-	48546472	48546713	10q11.22
TC1600001754.oe.1	0.00163887	up	2.3491	9.95199	9.13613	9.91719	9.39628	10.2418	10.5132	10.8453	11.5661	10.8646	11.0147	lnc-RRN3-2	LNCipedia Identified Transcript//NONCODE class 'Exonic', Ensembl Cross Reference: ENST00000570292 Name: NTAN1	---	---	---	lnc-RRN3-2:1	NonCoding	NONHSAT140733	---	---	---	chr16	-	15038608	15040467	16p13.11
TC0800001427.oe.1	0.0135727	up	2.34826	5.09005	5.82479	5.50276	5.19128	5.77804	6.8699	5.94986	8.02669	6.26588	6.43255	lnc-RP11-297N6.4.1-2//RP11-589N15.2//NONHSAG049557	LNCipedia Identified Transcript//NONCODE class 'Sense No Exonic', Ensembl Cross Reference: ENST00000602711 Name: RP11-589N15.2//N/A	ENST00000602711//ENST00000602711.1	---	---	lnc-RP11-297N6.4.1-2:1	NonCoding	NONHSAT125094	---	---	---	chr8	-	11846154	11846391	8p23.1
TC0800002204.oe.1	0.00194685	up	2.34785	6.25926	5.38215	5.57236	5.68481	6.16406	6.70936	7.11213	7.78931	7.04305	6.56547	lnc-YWHAZ-1//OTTHUMG00000172766//NONHSAG050902//RP11-521I2.3	LNCipedia Identified Transcript - Alternate transcript name(s): RP11-521I2.3-001//LNCipedia Identified Transcript//NONCODE class 'Linc'//N/A//NONCODE Identified Transcript, External ID: TCONS_00038029 Name: RP11-521I2.3, Ensembl Cross Reference: ENST00000564694 Name: RP11-521I2.3	ENST00000564694//ENST00000564694.1	---	OTTHUMT00000420385.2	lnc-YWHAZ-1:2//lnc-YWHAZ-1:1	NonCoding	NONHSAT128023//NONHSAT128022	---	---	---	chr8	-	100912760	100914388	8q22.3
TC2100000177.oe.1	0.0057297	up	2.34704	5.39908	4.87793	5.85181	5.61646	5.84817	7.44911	6.39923	7.38478	6.34479	6.16974	lnc-GRIK1-AS2-4	LNCipedia Identified Transcript - Alternate transcript name(s): ncRnaDb_ncrna_FR054959_1	---	---	---	lnc-GRIK1-AS2-4:1	NonCoding	---	---	---	---	chr21	+	29423741	29423959	21q21.3
TC0400002569.oe.1	0.0112313	up	2.34314	6.79868	7.9664	7.33696	7.19846	7.57958	7.56798	8.9404	9.51667	8.42186	8.57538	RP11-461L13.3//NONHSAG039119//lnc-FBXW7-5	NONCODE class 'Linc', Ensembl Cross Reference: ENST00000603766 Name: RP11-461L13.3//LNCipedia Identified Transcript//N/A	ENST00000603766.1//ENST00000603766	---	---	lnc-FBXW7-5:1	NonCoding	NONHSAT098798	---	---	---	chr4	-	152320544	152321044	4q31.3
TC1200002900.oe.1	3.04e-05	up	2.34132	11.5724	11.6603	11.7832	11.3212	11.9655	12.9947	12.7044	13.1361	12.9936	12.6103	lnc-HVCN1-3	LNCipedia Identified Transcript//NONCODE class 'Exonic', Ensembl Cross Reference: ENST00000546904 Name: PPP1CC	---	---	---	lnc-HVCN1-3:1	NonCoding	NONHSAT030703	---	---	---	chr12	-	110720366	110722467	12q24.11
TC0500002144.oe.1	0.00516981	up	2.34088	8.07467	7.71883	7.98775	7.64506	8.2479	8.26849	10.1397	9.02294	9.03194	9.34637	lnc-PLCXD3-2	NONCODE class 'Exonic', Ensembl Cross Reference: ENST00000503374 Name: OXCT1//LNCipedia Identified Transcript	---	---	---	lnc-PLCXD3-2:1	NonCoding	NONHSAT101176	---	---	---	chr5	-	41731739	41739721	5p13.1
TC1000001674.oe.1	0.000161	up	2.34037	9.41052	8.41332	8.63199	8.81004	8.81482	9.98606	10.0466	10.241	10.168	9.77265	lnc-PRTFDC1-1	NONCODE class 'Exonic', Ensembl Cross Reference: ENST00000476499 Name: ARHGAP21//LNCipedia Identified Transcript//NONCODE class 'Exonic', Ensembl Cross Reference: ENST00000472150 Name: ARHGAP21//NONCODE class 'Exonic', Ensembl Cross Reference: ENST00000463892 Name: ARHGAP21	---	---	---	lnc-PRTFDC1-1:1	NonCoding	NONHSAT011791//NONHSAT011790//NONHSAT011788	---	---	---	chr10	-	24629014	24723247	10p12.1
TC2000000827.oe.1	0.00351146	up	2.34034	9.2366	8.7508	8.6341	8.74515	8.15581	10.4171	10.0934	9.56572	9.16741	10.4125	lnc-PROKR2-4	LNCipedia Identified Transcript//NONCODE class 'Exonic', Ensembl Cross Reference: ENST00000473797 Name: GPCPD1	---	---	---	lnc-PROKR2-4:1	NonCoding	NONHSAT078508	---	---	---	chr20	-	5567521	5574123	20p12.3
TC1100001728.oe.1	0.00136156	up	2.33834	7.56635	7.85321	7.8356	7.519	7.86502	8.0354	9.22418	9.42993	8.91191	9.1652	lnc-POLR2L-5	LNCipedia Identified Transcript//NONCODE class 'Sense No Exonic', PubMed Identifer: PMID:22140575 mixed_Pred6924 , PubMed Identifer: PMID:22140575 brain_Pred5662	---	---	---	lnc-POLR2L-5:1	NonCoding	NONHSAT017355	---	---	---	chr11	-	880867	881475	11p15.5
TC0200001459.oe.1	0.00206811	up	2.33804	7.08449	6.70271	6.44135	5.8379	6.77715	8.11538	7.6158	8.2319	7.25271	7.7543	lnc-C2orf27A-5	LNCipedia Identified Transcript//NONCODE class 'Linc', External ID: TCONS_00021304	---	---	---	lnc-C2orf27A-5:1	NonCoding	NONHSAT074494	---	---	---	chr2	+	131682496	131697003	2q21.1
TC0X00000771.oe.1	0.00431216	up	2.33747	9.05647	7.87329	8.23953	8.34899	8.46712	9.08154	9.4228	10.4449	9.88231	9.27858	lnc-SLC25A5-3	NONCODE class 'Exonic', Ensembl Cross Reference: ENST00000484058 Name: SLC25A43//LNCipedia Identified Transcript	---	---	---	lnc-SLC25A5-3:1	NonCoding	NONHSAT138313	---	---	---	chrX	+	119406556	119452941	Xq24
TC1300001580.oe.1	0.0107804	up	2.33687	6.19545	5.37301	5.08109	5.20339	5.4163	5.49787	6.8222	6.83094	6.83969	7.40143	lnc-C13orf27-1	LNCipedia Identified Transcript//NONCODE class 'Exonic', Ensembl Cross Reference: ENST00000486540 Name: KDELC1	---	---	---	lnc-C13orf27-1:1	NonCoding	NONHSAT035013	---	---	---	chr13	-	102793153	102793678	13q33.1
TC0400000210.oe.1	0.0100219	up	2.33649	4.59325	4.61225	4.21573	4.25758	4.10823	4.76246	4.75942	6.04223	5.8597	6.48494	lnc-CC2D2A-1	LNCipedia Identified Transcript//NONCODE class 'Sense No Exonic'	---	---	---	lnc-CC2D2A-1:1	NonCoding	NONHSAT095623	---	---	---	chr4	+	15410698	15412199	4p15.32
TC0300000607.oe.1	0.00520719	up	2.33608	6.82963	5.43831	6.33516	5.4366	6.48183	7.1917	7.09362	7.70752	7.67254	6.97659	lnc-RPP14-2	LNCipedia Identified Transcript//NONCODE class 'Exonic', Ensembl Cross Reference: ENST00000470440 Name: ABHD6	---	---	---	lnc-RPP14-2:1	NonCoding	NONHSAT090112	---	---	---	chr3	+	58285197	58293658	3p14.3
TC0400000449.oe.1	0.00796693	up	2.33269	3.99834	4.48199	4.48951	3.40549	4.49776	5.41235	5.90978	4.37323	5.83215	5.45556	lnc-SPATA18-4	LNCipedia Identified Transcript - Alternate transcript name(s): l_2641_chr4:53220577-53222845_kidney	---	---	---	lnc-SPATA18-4:1	NonCoding	---	---	---	---	chr4	+	52354412	52356679	4q12
TC2200001226.oe.1	0.00822025	up	2.33206	6.89466	6.90736	6.01207	7.03381	7.04168	7.47745	7.71231	8.69833	8.70725	7.40225	lnc-SMC1B-7	NONCODE class 'Exonic', Ensembl Cross Reference: ENST00000483374 Name: KIAA0930//LNCipedia Identified Transcript	---	---	---	lnc-SMC1B-7:1	NonCoding	NONHSAT087213	---	---	---	chr22	-	45196702	45198033	22q13.31
TC0500002423.oe.1	0.00278381	up	2.32956	8.70705	7.95937	7.73218	7.59469	8.47369	9.52499	8.71843	9.83542	9.39568	9.09273	lnc-OTP-3	LNCipedia Identified Transcript//NONCODE class 'Linc'	---	---	---	lnc-OTP-3:1	NonCoding	NONHSAT102298	---	---	---	chr5	-	77786124	77786602	5q14.1
TC1000001164.oe.1	0.00189198	up	2.32682	6.374	5.15945	5.91452	5.30391	5.88392	7.0245	6.65387	7.48835	6.87673	6.68415	lnc-MXI1-3	LNCipedia Identified Transcript//NONCODE class 'Exonic', Ensembl Cross Reference: ENST00000459738 Name: ADD3//NONCODE class 'Exonic', Ensembl Cross Reference: ENST00000495661 Name: ADD3//NONCODE class 'Exonic', Ensembl Cross Reference: ENST00000497125 Name: ADD3	---	---	---	lnc-MXI1-3:1	NonCoding	NONHSAT016332//NONHSAT016330//NONHSAT016331	---	---	---	chr10	+	110008209	110118630	10q25.1
TC2000000592.oe.1	0.0251377	up	2.32469	6.71577	6.67584	6.42234	7.28352	6.83955	6.72385	7.40987	8.6127	9.06058	8.2152	lnc-PFDN4-5	LNCipedia Identified Transcript//NONCODE class 'Exonic', Ensembl Cross Reference: ENST00000484860 Name: DOK5	---	---	---	lnc-PFDN4-5:1	NonCoding	NONHSAT080420	---	---	---	chr20	+	54554933	54555557	20q13.2
TC0800000868.oe.1	0.00199192	up	2.32464	10.2094	9.76527	10.1716	10.4149	10.6406	10.6518	11.3884	11.8813	11.91	11.4552	lnc-SDC2-4	LNCipedia Identified Transcript//NONCODE class 'Exonic'	---	---	---	lnc-SDC2-4:1	NonCoding	NONHSAT127867	---	---	---	chr8	+	96785128	96835191	8q22.1
TC0100000375.oe.1	0.00453527	up	2.32322	5.68073	5.54693	5.03287	4.60412	5.3172	5.57244	6.29604	6.80308	6.9447	6.64621	lnc-KDM1A-3	NONCODE class 'Exonic', Ensembl Cross Reference: ENST00000490436 Name: EPHB2//LNCipedia Identified Transcript	---	---	---	lnc-KDM1A-3:1	NonCoding	NONHSAT001495	---	---	---	chr1	+	22865159	22882840	1p36.12
TC1000000681.oe.1	0.0150693	up	2.31636	6.43062	6.00672	6.04046	5.92884	6.09154	7.40799	7.4685	7.15421	6.06386	8.46294	lnc-H2AFY2-3	NONCODE class 'Sense No Exonic', Ensembl Cross Reference: ENST00000484990 Name: COL13A1//LNCipedia Identified Transcript	---	---	---	lnc-H2AFY2-3:1	NonCoding	NONHSAT013817	---	---	---	chr10	+	69877296	69879427	10q22.1
TC1100000679.oe.1	0.00934373	up	2.31606	4.91456	4.97965	5.24522	4.50623	4.90409	6.93945	5.57969	6.58375	5.11641	6.38884	lnc-MS4A3-2	LNCipedia Identified Transcript//NONCODE class 'Exonic', Ensembl Cross Reference: ENST00000440896 Name: MS4A2//NONCODE class 'Exonic'	---	---	---	lnc-MS4A3-2:1	NonCoding	NONHSAT021558//NONHSAT021557	---	---	---	chr11	+	60088664	60095587	11q12.1
TC0700002805.oe.1	0.0155479	up	2.31573	6.70195	5.75158	5.28796	5.53806	6.13438	5.97315	7.41059	7.22306	7.82312	7.04133	lnc-SLC13A4-1	NONCODE class 'Exonic', External ID: TCONS_00036169 Name: AC091736.10, Ensembl Cross Reference: ENST00000422620 Name: AC091736.10//NONCODE class 'Exonic', External ID: TCONS_00036168 Name: AC091736.10, Ensembl Cross Reference: ENST00000378428 Name: AC091736.10//solute carrier family 13 (sodium/sulfate symporter), member 4 [Source:HGNC Symbol;Acc:HGNC:15827]//LNCipedia Identified Transcript - Alte…	ENST00000378428//ENST00000422620	---	OTTHUMT00000340811.1//OTTHUMT00000340553.1	lnc-SLC13A4-1:1	NonCoding	NONHSAT123528//NONHSAT123529	---	---	---	chr7	-	135708141	135729258	7q33
TC1400001200.oe.1	0.0458517	up	2.31556	6.19714	5.51169	5.78102	5.85058	5.93208	8.93851	6.96723	6.54912	5.9669	6.90756	lnc-CIDEB-1	NONCODE class 'Exonic', Ensembl Cross Reference: ENST00000555684 Name: ADCY4//LNCipedia Identified Transcript	---	---	---	lnc-CIDEB-1:1	NonCoding	NONHSAT036047	---	---	---	chr14	-	24318364	24319209	14q12
TC0900000464.oe.1	0.00510054	up	2.3151	8.95264	7.51478	8.27485	7.76049	8.57442	9.57035	9.02492	9.9543	9.02593	9.55704	lnc-RP11-262H14.4.1-7	NONCODE class 'Linc', Ensembl Cross Reference: ENST00000402994 Name: RP11-262H14.11//LNCipedia Identified Transcript	---	---	---	lnc-RP11-262H14.4.1-7:1	NonCoding	NONHSAT131549	---	---	---	chr9	+	62888535	62889921	9q13
TC0300000136.oe.1	0.0221573	up	2.31413	5.18823	5.07511	5.16078	4.98084	5.47877	5.86099	5.94861	8.05678	6.11918	5.95052	lnc-LSM3-5	NONCODE class 'Sense No Exonic', External ID: TCONS_00026663//LNCipedia Identified Transcript//NONCODE class 'Sense No Exonic'	---	---	---	lnc-LSM3-5:1	NonCoding	NONHSAT088346//NONHSAT088347	---	---	---	chr3	+	14418870	14420124	3p25.1
TC0900001488.oe.1	0.00106286	up	2.31241	6.18529	5.66937	5.82278	6.30904	6.39145	6.62672	7.48497	7.82814	7.29965	7.18543	lnc-C9orf92-5	NONCODE class 'Sense No Exonic', Ensembl Cross Reference: ENST00000438629 Name: RP11-335H2.2//LNCipedia Identified Transcript	---	---	---	lnc-C9orf92-5:1	NonCoding	NONHSAT130296	---	---	---	chr9	-	16775573	16775845	9p22.2
TC0600000296.oe.1	0.000436	up	2.31221	6.21488	6.51638	5.369	5.92605	5.95584	6.97512	7.34662	7.47621	7.05095	7.17962	lnc-C6orf228-4	LNCipedia Identified Transcript//NONCODE class 'Exonic'	---	---	---	lnc-C6orf228-4:1	NonCoding	NONHSAT107739	---	---	---	chr6	+	11136920	11138738	6p24.2
TC1400001747.oe.1	0.04464	up	2.31117	7.61965	6.35268	6.51387	6.67615	7.08529	6.67981	7.59298	9.37612	8.57974	8.06209	lnc-C14orf1-2	LNCipedia Identified Transcript//NONCODE class 'Exonic', Ensembl Cross Reference: ENST00000556507 Name: TGFB3	---	---	---	lnc-C14orf1-2:1	NonCoding	NONHSAT037878	---	---	---	chr14	-	75959289	75960957	14q24.3
TC2100000665.oe.1	0.00133196	up	2.31023	7.20921	5.94886	6.41446	6.36309	6.42033	7.72811	7.81342	8.00822	7.1361	7.71028	lnc-CYYR1-5	NONCODE Identified Transcript//LNCipedia Identified Transcript//NONCODE class 'Sense No Exonic'	---	---	---	lnc-CYYR1-5:1	NonCoding	NONHSAT081532//NONHSAT081531	---	---	---	chr21	-	26165897	26167324	21q21.3
TC0100005295.oe.1	0.00976446	up	2.30898	11.9181	10.3396	10.9916	10.9603	11.3461	11.7973	11.6974	12.9635	12.4471	12.6869	lnc-ENAH-2	NONCODE class 'Exonic', Ensembl Cross Reference: ENST00000488523 Name: ENAH//LNCipedia Identified Transcript//NONCODE class 'Exonic', Ensembl Cross Reference: ENST00000358675 Name: ENAH//NONCODE class 'Exonic', Ensembl Cross Reference: ENST00000483952 Name: ENAH//NONCODE class 'Exonic', Ensembl Cross Reference: ENST00000498108 Name: ENAH	---	---	---	lnc-ENAH-2:1	NonCoding	NONHSAT009838//NONHSAT009840//NONHSAT009839//NONHSAT009841	---	---	---	chr1	-	225489800	225515397	1q42.12
TC1900001707.oe.1	0.0057916	up	2.30825	7.26159	6.49504	6.69795	7.09623	7.3238	9.28784	7.97895	7.87832	8.0079	7.75561	lnc-MYO1F-1	LNCipedia Identified Transcript//NONCODE class 'Exonic', Ensembl Cross Reference: ENST00000596911 Name: ADAMTS10	---	---	---	lnc-MYO1F-1:1	NonCoding	NONHSAT060922	---	---	---	chr19	-	8586622	8589691	19p13.2
TC0100002626.oe.1	0.00189635	up	2.30806	9.00524	9.10998	8.97422	8.89861	9.25564	9.5651	10.0547	10.9988	10.6865	9.97199	lnc-FBXO28-6	NONCODE class 'Exonic', Ensembl Cross Reference: ENST00000492565 Name: CAPN2//LNCipedia Identified Transcript	---	---	---	lnc-FBXO28-6:1	NonCoding	NONHSAT009742	---	---	---	chr1	+	223759434	223764207	1q41
TC1400000528.oe.1	0.0111029	up	2.30768	5.69318	5.40164	6.1758	4.73644	5.08578	7.23773	6.80538	6.09336	5.88296	7.10563	lnc-RP11-47I22.4.1-1	LNCipedia Identified Transcript//NONCODE class 'Exonic', Ensembl Cross Reference: ENST00000555110 Name: PRKCH	---	---	---	lnc-RP11-47I22.4.1-1:1	NonCoding	NONHSAT037256	---	---	---	chr14	+	61525090	61529205	14q23.1
TC1100001448.oe.1	0.00132971	up	2.30751	6.63938	6.33878	6.86516	6.83866	6.60328	8.50348	7.78126	8.07674	7.0808	7.87465	lnc-TAGLN-1	LNCipedia Identified Transcript//NONCODE class 'Exonic', PubMed Identifer: PMID:22140575 brain_Pred7888	---	---	---	lnc-TAGLN-1:1	NonCoding	NONHSAT024388	---	---	---	chr11	+	117199324	117204787	11q23.3
TC06004124.hg.4	0.0202691	up	2.30661	3.19571	3.09542	3.23617	3.81252	2.89803	5.42667	4.31999	5.27458	3.6109	3.6346	HLA-DRB6	major histocompatibility complex, class II, DR beta 6 (pseudogene)	ENST00000411500	3128	---	---	NonCoding	---	L76565	uc003obn.1//uc003obm.1	NR_001298	chr6	-	32552713	32560002	6p21.3
TC1300000520.oe.1	0.00142629	up	2.30605	8.24903	7.75663	7.47436	7.69716	7.85562	8.55403	8.83543	9.82072	9.08196	8.7678	lnc-BORA-25	LNCipedia Identified Transcript//NONCODE class 'Linc', Ensembl Cross Reference: ENST00000411421 Name: ZDHHC20P4	---	---	---	lnc-BORA-25:1	NonCoding	NONHSAT034239	---	---	---	chr13	+	68985058	68986064	13q21.33
TC1100003141.oe.1	0.000483	up	2.29873	15.0667	14.1458	13.9628	14.1298	14.4172	15.3478	15.8626	15.4751	15.51	15.5309	lnc-CLMP-3	LNCipedia Identified Transcript//NONCODE class 'Exonic', Ensembl Cross Reference: ENST00000532167 Name: HSPA8//NONCODE class 'Exonic', PubMed Identifer: PMID:22140575 brain_Pred8093	---	---	---	lnc-CLMP-3:1	NonCoding	NONHSAT024832//NONHSAT024836	---	---	---	chr11	-	123057493	123062136	11q24.1
TC1100001093.oe.1	0.00340485	up	2.29764	4.95152	5.17617	5.26662	4.94003	5.13826	7.0881	5.87692	6.87357	5.94114	5.69365	lnc-NEU3-2	LNCipedia Identified Transcript//NONCODE class 'Exonic', Ensembl Cross Reference: ENST00000531457 Name: SLCO2B1	---	---	---	lnc-NEU3-2:1	NonCoding	NONHSAT023078	---	---	---	chr11	+	75151079	75162923	11q13.4
TC0500000705.oe.1	0.0474646	up	2.29721	5.13893	4.43212	5.40207	4.86606	4.80223	8.04333	5.78656	5.83253	5.35075	5.62764	lnc-S100Z-2	NONCODE class 'Exonic', Ensembl Cross Reference: ENST00000503763 Name: CRHBP//LNCipedia Identified Transcript	---	---	---	lnc-S100Z-2:1	NonCoding	NONHSAT102254	---	---	---	chr5	+	76963235	76968956	5q13.3
TC2100000345.oe.1	0.00269771	up	2.29357	6.38282	6.45348	6.35586	6.15713	6.63978	6.80925	7.55155	8.48537	7.69304	7.43781	lnc-FAM3B-4	NONCODE class 'Exonic', Ensembl Cross Reference: ENST00000475618 Name: BACE2//LNCipedia Identified Transcript	---	---	---	lnc-FAM3B-4:1	NonCoding	NONHSAT082245	---	---	---	chr21	+	41252465	41257326	21q22.3
TC0500001133.oe.1	0.00786075	up	2.2931	8.57058	7.03203	7.16832	7.92537	7.71551	8.19522	8.81356	8.856	9.21069	9.32284	lnc-KIAA1024L-1	LNCipedia Identified Transcript//NONCODE class 'Exonic', Ensembl Cross Reference: ENST00000507545 Name: CHSY3	---	---	---	lnc-KIAA1024L-1:1	NonCoding	NONHSAT103671	---	---	---	chr5	+	129908087	130184502	5q23.3
TC0500003214.oe.1	0.00233551	up	2.29079	4.25992	4.3006	4.2564	4.06954	4.2017	4.61534	5.2375	6.1033	5.18728	5.92396	NONHSAG042182//lnc-PANK3-15//CTB-174D11.3	LNCipedia Identified Transcript//NONCODE class 'Sense No Exonic'//N/A	ENST00000623273.1	---	---	lnc-PANK3-15:1	NonCoding	NONHSAT105007	---	---	---	chr5	-	169011947	169013146	5q35.1
TC1700002388.oe.1	0.0348632	up	2.28589	9.57546	8.19346	7.58032	7.81147	8.1746	8.30651	9.98931	9.74957	9.99072	9.26299	lnc-KLHL11-2	NONCODE class 'Exonic', Ensembl Cross Reference: ENST00000588547 Name: ACLY//LNCipedia Identified Transcript	---	---	---	lnc-KLHL11-2:1	NonCoding	NONHSAT053663	---	---	---	chr17	-	41904440	41905641	17q21.2
TC1100002215.oe.1	0.0016406	up	2.28496	8.47113	8.33703	8.80313	8.56393	9.24478	10.2078	9.56181	10.4132	9.87636	9.32163	lnc-KBTBD4-4	NONCODE class 'Exonic', PubMed Identifer: PMID:22140575 brain_Pred6400//LNCipedia Identified Transcript//NONCODE class 'Exonic', Ensembl Cross Reference: ENST00000524648 Name: CELF1	---	---	---	lnc-KBTBD4-4:1	NonCoding	NONHSAT021253//NONHSAT021252	---	---	---	chr11	-	47470329	47553136	11p11.2
TC0700002384.oe.1	0.001098	up	2.28458	9.80083	8.80351	9.63851	9.61988	9.35348	10.8937	10.2952	10.3446	11.1385	10.5038	lnc-HGF-5	LNCipedia Identified Transcript//NONCODE class 'Exonic', Ensembl Cross Reference: ENST00000469297 Name: CACNA2D1	---	---	---	lnc-HGF-5:1	NonCoding	NONHSAT121767	---	---	---	chr7	-	81961894	81964282	7q21.11
TC0500002758.oe.1	0.00605532	up	2.28238	9.41313	8.54551	8.68274	8.55617	9.10727	9.11369	10.7047	10.1186	10.4326	9.88798	lnc-PPIC-4	LNCipedia Identified Transcript//NONCODE class 'Linc', Ensembl Cross Reference: ENST00000577215 Name: RN7SL689P	---	---	---	lnc-PPIC-4:1	NonCoding	NONHSAT103498	---	---	---	chr5	-	123022489	123022783	5q23.2
TC0100002646.oe.1	0.0051671	up	2.28212	4.90506	4.55446	4.47119	4.10981	4.98368	5.43419	5.11457	6.68542	5.70322	6.03869	OTTHUMG00000037739//NONHSAG004453//XLOC_000587//RP11-145A3.1//lnc-SRP9-1	NONCODE class 'Linc', External ID: TCONS_00002417//N/A//gene_id XLOC_000587; transcript_id TCONS_00001308; oId TCONS_00000585; linc_name linc-SRP9-1; tss_id TSS914; class_code .; gene_name linc-SRP9-1;//NONCODE class 'Linc', External ID: TCONS_00000577 Name: RP11-145A3.1, Ensembl Cross Reference: ENST00000448264 Name: RP11-145A3.1//NONCODE class 'Linc', External ID: TCONS_00002415//gene_id XLOC_0…	ENST00000448264.1//ENST00000448264	---	OTTHUMT00000092057.1	lnc-SRP9-1:2//lnc-SRP9-1:4//lnc-SRP9-1:1//lnc-SRP9-1:3//lnc-SRP9-1:5	NonCoding	NONHSAT009847//NONHSAT009844//NONHSAT009845//NONHSAT009846//NONHSAT009848	TCONS_00001308//TCONS_00002241//TCONS_00001306//TCONS_00001307	---	---	chr1	+	225700604	225752243	1q42.12
TC1000001671.oe.1	0.0040355	up	2.28137	9.88791	8.19976	9.40298	9.54063	9.57745	10.3399	10.6669	10.5345	10.6311	10.3859	lnc-PRTFDC1-4	LNCipedia Identified Transcript//NONCODE class 'Exonic', Ensembl Cross Reference: ENST00000477190 Name: ARHGAP21	---	---	---	lnc-PRTFDC1-4:1	NonCoding	NONHSAT011784	---	---	---	chr10	-	24585920	24590042	10p12.1
TC1900002684.oe.1	0.0248777	up	2.27977	4.26506	4.52686	4.35462	4.6426	4.62945	7.31141	5.19795	5.66991	4.97558	5.20818	lnc-MBOAT7-3	LNCipedia Identified Transcript//NONCODE class 'Exonic', Ensembl Cross Reference: ENST00000460208 Name: LILRB3	---	---	---	lnc-MBOAT7-3:3	NonCoding	NONHSAT067881	---	---	---	chr19	-	54217096	54217698	19q13.42
TC0600002553.oe.1	0.010777	up	2.27902	5.293	6.01923	5.53308	5.23204	5.38265	6.45463	5.92302	7.91061	6.46065	6.65318	lnc-C6orf138-2	LNCipedia Identified Transcript//NONCODE class 'Linc'	---	---	---	lnc-C6orf138-2:1	NonCoding	NONHSAT113049	---	---	---	chr6	-	48088289	48096471	6p12.3
TC0100002432.oe.1	0.00118983	up	2.27853	10.3031	11.2167	10.9924	11.026	10.7665	12.4823	11.5807	12.3726	12.1598	11.6498	lnc-C1orf186-5	LNCipedia Identified Transcript - Alternate transcript name(s): NONHSAT009036	---	---	---	lnc-C1orf186-5:1	NonCoding	---	---	---	---	chr1	+	206222289	206227567	1q32.1
TC1400001643.oe.1	0.0139794	up	2.27663	10.59	9.09587	9.37152	8.7253	9.85328	10.3869	10.4696	11.2821	11.0994	10.3323	lnc-ZFP36L1-5	LNCipedia Identified Transcript//NONCODE class 'Exonic', Ensembl Cross Reference: ENST00000556343 Name: ACTN1	---	---	---	lnc-ZFP36L1-5:1	NonCoding	NONHSAT037499	---	---	---	chr14	-	68883265	68884295	14q24.1
TC0900000509.oe.1	0.00300367	up	2.27605	5.13747	5.17736	5.29023	5.31162	4.98164	7.42925	6.03363	6.25737	6.25677	5.85394	lnc-PGM5-2	LNCipedia Identified Transcript//NONCODE class 'Exonic', Ensembl Cross Reference: ENST00000496758 Name: PGM5	---	---	---	lnc-PGM5-2:1	NonCoding	NONHSAT131747	---	---	---	chr9	+	68496825	68531061	9q21.11
TC0200004875.oe.1	0.0355921	up	2.27534	4.85947	4.4659	4.53655	4.59771	4.44958	4.63734	5.62761	7.32445	6.14718	5.10304	AC112721.2//OTTHUMG00000152980//lnc-AC112721.1.1-1//NONHSAG030913//XLOC_002531	NONCODE class 'Linc', External ID: TCONS_00021069 Name: AC112721.2, Ensembl Cross Reference: ENST00000409910 Name: AC112721.2//gene_id XLOC_002531; transcript_id TCONS_00003518; oId ENST00000409910; linc_name linc-COL6A3-2; tss_id TSS4015; class_code u; gene_name linc-COL6A3-2;//N/A//LNCipedia Identified Transcript - Alternate transcript name(s): AC112721.2-001	ENST00000409910.1//ENST00000409910	---	OTTHUMT00000328876.2	lnc-AC112721.1.1-1:1	NonCoding	NONHSAT077643	TCONS_00003518	---	---	chr2	-	237428920	237434822	2q37.3
TC0500002627.oe.1	0.0123636	up	2.27093	4.1685	4.08704	4.9424	4.56888	4.28283	6.66944	5.42336	5.98894	4.81323	5.07111	lnc-SLCO4C1-5	LNCipedia Identified Transcript//NONCODE class 'Sense No Exonic'	---	---	---	lnc-SLCO4C1-5:1	NonCoding	NONHSAT103012	---	---	---	chr5	-	100870499	100872011	5q21.1
TC0900000938.oe.1	0.00466348	up	2.27076	7.96109	8.35522	7.73817	8.16019	8.14633	9.37679	8.43139	9.73682	9.95371	8.77816	lnc-DNAJC25-GNG10-2	NONCODE class 'Exonic', Ensembl Cross Reference: ENST00000474306 Name: UGCG//LNCipedia Identified Transcript	---	---	---	lnc-DNAJC25-GNG10-2:1	NonCoding	NONHSAT133993	---	---	---	chr9	+	111929249	111931308	9q31.3
TC1100001767.oe.1	0.0137867	up	2.27073	7.68954	6.74753	7.11338	6.30183	7.37309	7.6736	7.86267	9.18183	8.61045	7.8126	lnc-NAP1L4-3	LNCipedia Identified Transcript//NONCODE class 'Exonic', Ensembl Cross Reference: ENST00000465240 Name: CARS	---	---	---	lnc-NAP1L4-3:1	NonCoding	NONHSAT017549	---	---	---	chr11	-	3019190	3029057	11p15.4
TC0400001689.oe.1	0.0210512	up	2.2692	4.61427	4.73908	5.10636	4.5253	4.83829	7.31613	5.53829	5.76588	4.91337	6.20056	lnc-TAPT1-5	LNCipedia Identified Transcript - Alternate transcript name(s): ucscGeneNc_uc003gpc_2	---	---	---	lnc-TAPT1-5:1	NonCoding	---	---	---	---	chr4	-	16780856	16795155	4p15.32
TC0800002455.oe.1	0.000904	up	2.26914	6.59529	6.00875	6.73388	6.87758	6.57164	7.86817	7.21706	7.96912	7.45236	8.19116	lnc-FAM49B-8	LNCipedia Identified Transcript - Alternate transcript name(s): ucscGeneNc_uc003ytc_1	---	---	---	lnc-FAM49B-8:1	NonCoding	---	---	---	---	chr8	-	130364537	130365715	8q24.21
TC0700002155.oe.1	0.00327012	up	2.26813	11.1734	10.0807	9.91682	10.0039	10.4136	10.8652	11.7034	11.753	11.7479	11.4265	lnc-VOPP1-2	LNCipedia Identified Transcript//NONCODE class 'Linc'	---	---	---	lnc-VOPP1-2:6	NonCoding	NONHSAT120691	---	---	---	chr7	-	55681153	55682769	7p11.2
TC1500000301.oe.1	0.00243639	up	2.26807	5.84274	4.65562	5.34061	4.42717	5.44959	6.43843	6.4133	6.13451	6.46645	6.17037	lnc-TYRO3-1	LNCipedia Identified Transcript//NONCODE class 'Exonic', Ensembl Cross Reference: ENST00000568490 Name: TYRO3	---	---	---	lnc-TYRO3-1:1	NonCoding	NONHSAT041954	---	---	---	chr15	+	41577335	41579338	15q15.1
TC0900001337.oe.1	0.00503989	up	2.26756	4.72216	4.75475	4.74629	4.80572	5.23592	6.42766	5.28832	6.92064	5.56898	5.96493	lnc-LCNL1-2	NONCODE class 'Exonic', Ensembl Cross Reference: ENST00000462514 Name: PTGDS//LNCipedia Identified Transcript	---	---	---	lnc-LCNL1-2:1	NonCoding	NONHSAT135638	---	---	---	chr9	+	136979916	136981056	9q34.3
TC1100002731.oe.1	6.86e-05	up	2.26698	7.75147	7.37322	7.53506	7.71139	7.92707	9.17031	8.94832	8.67368	8.45083	8.95892	lnc-FAM181B-5	NONCODE class 'Exonic', Ensembl Cross Reference: ENST00000531283 Name: PRCP//NONCODE class 'Exonic', Ensembl Cross Reference: ENST00000532767//NONCODE class 'Exonic', Ensembl Cross Reference: ENST00000526918 Name: PRCP//LNCipedia Identified Transcript//NONCODE class 'Exonic', Ensembl Cross Reference: ENST00000532476 Name: PRCP//NONCODE class 'Exonic', Ensembl Cross Reference: ENST00000524642 Name…	---	---	---	lnc-FAM181B-5:1	NonCoding	NONHSAT023354//NONHSAT023353//NONHSAT023355//NONHSAT023357//NONHSAT023352//NONHSAT023356//NONHSAT023351	---	---	---	chr11	-	82824367	82846179	11q14.1
TC1100001501.oe.1	0.00337225	up	2.26627	4.07644	4.11676	3.94001	3.50566	4.16648	4.57929	5.29954	6.07743	4.87116	4.87952	RP11-334E6.12//NONHSAG009826//OTTHUMG00000179599//lnc-RP11-334E6.3.1-2	NONCODE class 'Antisense', External ID: TCONS_00005598 Name: RP11-334E6.12, Ensembl Cross Reference: ENST00000578216 Name: RP11-334E6.12//N/A//LNCipedia Identified Transcript - Alternate transcript name(s): RP11-334E6.12-001	ENST00000578216//ENST00000578216.1	---	OTTHUMT00000447246.1	lnc-RP11-334E6.3.1-2:1	NonCoding	NONHSAT024668	---	---	---	chr11	+	119417951	119419114	11q23.3
TC0200004536.oe.1	0.0359463	up	2.26357	4.17528	4.22869	4.27691	3.86055	3.92374	6.39797	5.61588	4.03403	4.35023	5.96005	lnc-AC073043.2.1-3	LNCipedia Identified Transcript//NONCODE class 'Exonic', Ensembl Cross Reference: ENST00000463386 Name: SATB2	---	---	---	lnc-AC073043.2.1-3:1	NonCoding	NONHSAT076252	---	---	---	chr2	-	199456053	199465167	2q33.1
TC1800000798.oe.1	0.0199201	up	2.26351	5.51079	4.57333	4.37484	5.15055	4.71077	7.19794	5.35538	6.49912	5.49447	5.66616	lnc-ZFP161-2	LNCipedia Identified Transcript//NONCODE class 'Exonic', Ensembl Cross Reference: ENST00000578432 Name: EPB41L3	---	---	---	lnc-ZFP161-2:1	NonCoding	NONHSAT057078	---	---	---	chr18	-	5429248	5433559	18p11.31
TC1700001837.oe.1	0.0104823	up	2.26184	5.98682	5.7968	6.06779	6.51627	5.89363	7.91686	6.47856	8.12831	6.87583	6.74924	lnc-MYH13-3	NONCODE class 'Sense No Exonic', External ID: TCONS_00015681 Name: CTB-104H12.4, Ensembl Cross Reference: ENST00000584264 Name: CTB-104H12.4//LNCipedia Identified Transcript - Alternate transcript name(s): CTB-104H12.4-001, ENST00000584264, OTTHUMT00000442085.1//LNCipedia Identified Transcript	---	---	---	lnc-MYH13-3:1	NonCoding	NONHSAT145608	---	---	---	chr17	-	10130894	10131387	17p13.1
TC0100004241.oe.1	7.25e-05	up	2.26179	5.8684	5.5819	5.68198	5.73299	6.24384	6.75872	6.79772	7.14511	7.33497	6.95992	lnc-KCND3-3	LNCipedia Identified Transcript//NONCODE class 'Exonic'	---	---	---	lnc-KCND3-3:1	NonCoding	NONHSAT005199	---	---	---	chr1	-	111722804	111725438	1p13.2
TC0300002857.oe.1	0.00555967	up	2.26078	9.50016	10.2926	10.3566	10.327	10.2324	12.2081	11.0348	11.6605	10.8327	10.8567	lnc-TMCC1-7	LNCipedia Identified Transcript//NONCODE class 'Exonic', Ensembl Cross Reference: ENST00000514990 Name: PLXND1	---	---	---	lnc-TMCC1-7:1	NonCoding	NONHSAT092066	---	---	---	chr3	-	129569189	129571204	3q22.1
TC02001686.hg.4	0.00414047	up	2.26053	7.05181	6.48662	6.68134	6.59091	7.10675	8.29048	7.29908	8.8248	7.61638	7.77001	FTH1P3	ferritin, heavy polypeptide 1 pseudogene 3	---	2498	---	---	NonCoding	---	---	uc002rkn.1	NR_002201	chr2	-	27392623	27393576	2p23.3
TC0900000261.oe.1	0.000783	up	2.25808	11.0289	10.0158	9.88946	10.473	10.5906	11.7807	11.4375	11.7658	11.3254	11.5639	lnc-SPINK4-3	LNCipedia Identified Transcript//NONCODE class 'Exonic', Ensembl Cross Reference: ENST00000495015 Name: DNAJA1	---	---	---	lnc-SPINK4-3:1	NonCoding	NONHSAT130699	---	---	---	chr9	+	33025286	33038726	9p21.1
TC0X00001930.oe.1	0.00567136	up	2.25803	8.61431	9.03401	9.20542	9.35908	9.47548	10.8391	9.96118	11.0586	9.59093	10.1138	lnc-GAB3-1	LNCipedia Identified Transcript//NONCODE class 'Exonic', Ensembl Cross Reference: ENST00000482757 Name: MPP1	---	---	---	lnc-GAB3-1:1	NonCoding	NONHSAT139213	---	---	---	chrX	-	154778723	154781596	Xq28
TC0800000878.oe.1	0.00422596	up	2.25595	5.12039	5.32709	5.58323	5.61504	5.71443	5.80381	6.42272	6.94288	7.46928	6.59015	lnc-LAPTM4B-3	LNCipedia Identified Transcript//NONCODE class 'Exonic', Ensembl Cross Reference: ENST00000520160 Name: MATN2	---	---	---	lnc-LAPTM4B-3:1	NonCoding	NONHSAT127889	---	---	---	chr8	+	97887834	97931106	8q22.2
TC1100002538.oe.1	0.0125566	up	2.25367	10.5927	9.70801	9.65228	9.87553	10.0536	9.90473	11.8028	11.4394	11.271	11.3255	lnc-SUV420H1-1	LNCipedia Identified Transcript//NONCODE class 'Exonic', Ensembl Cross Reference: ENST00000531745 Name: C11orf24	---	---	---	lnc-SUV420H1-1:1	NonCoding	NONHSAT022516	---	---	---	chr11	-	68261463	68263355	11q13.2
TC1000000749.oe.1	0.0111742	up	2.25157	6.35942	5.74351	6.93869	5.5527	6.0337	6.49737	6.94805	7.69824	7.94288	7.39614	lnc-VCL-2	NONCODE class 'Antisense', External ID: TCONS_00004994 Name: RP11-178G16.5, Ensembl Cross Reference: ENST00000599110 Name: RP11-178G16.5//LNCipedia Identified Transcript//N/A	ENST00000599110	---	---	lnc-VCL-2:1	NonCoding	NONHSAT014050	---	---	---	chr10	+	74121042	74121363	10q22.2
TC0600001723.oe.1	0.000761	up	2.25114	8.5829	8.31779	8.60726	8.43439	8.49347	10.2932	9.26273	9.97143	9.1334	9.6283	lnc-PACRG-4	LNCipedia Identified Transcript - Alternate transcript name(s): NONHSAT115965	---	---	---	lnc-PACRG-4:1	NonCoding	---	---	---	---	chr6	+	163506573	163508155	6q26
TC0700002400.oe.1	0.0327811	up	2.2502	6.15255	6.27726	6.82642	6.16358	7.25601	6.58871	7.2633	8.07688	8.96346	7.63373	lnc-C7orf23-3	NONCODE class 'Exonic', Ensembl Cross Reference: ENST00000480216 Name: KIAA1324L//LNCipedia Identified Transcript	---	---	---	lnc-C7orf23-3:2	NonCoding	NONHSAT121806	---	---	---	chr7	-	86891195	86892935	7q21.12
TC0500002436.oe.1	0.0131964	up	2.2489	7.11078	6.32612	6.78524	6.00064	6.91009	7.51259	7.48066	8.862	8.04826	7.07546	lnc-AP3B1-4	LNCipedia Identified Transcript//NONCODE class 'Exonic', Ensembl Cross Reference: ENST00000502722 Name: LHFPL2	---	---	---	lnc-AP3B1-4:1	NonCoding	NONHSAT102329	---	---	---	chr5	-	78488812	78491306	5q14.1
TC0700001256.oe.1	0.0324125	up	2.24695	14.1207	12.3237	12.8358	12.8608	13.3109	12.9384	14.6379	14.772	14.3511	14.5924	lnc-CCDC136-1	LNCipedia Identified Transcript//NONCODE class 'Exonic'	---	---	---	lnc-CCDC136-1:2	NonCoding	NONHSAT123250	---	---	---	chr7	+	128771089	128771474	7q32.1
TC2100000035.oe.1	0.000903	up	2.24567	8.43418	7.64536	8.26052	7.69961	8.17916	9.64465	8.96393	9.56781	8.84297	9.03517	lnc-POTED-10	LNCipedia Identified Transcript//NONCODE class 'Linc', Ensembl Cross Reference: ENST00000332473 Name: FGF7P2	---	---	---	lnc-POTED-10:1	NonCoding	NONHSAT081102	---	---	---	chr21	+	13349265	13350648	21q11.2
TC0100002119.oe.1	0.00237426	up	2.24251	8.52675	7.25086	7.55119	7.22127	7.78006	9.2551	8.68679	8.77022	8.55593	8.88767	lnc-SOAT1-4	NONCODE class 'Antisense', Ensembl Cross Reference: ENST00000451239 Name: EIF4A1P11//LNCipedia Identified Transcript	---	---	---	lnc-SOAT1-4:1	NonCoding	NONHSAT007855	---	---	---	chr1	+	179201705	179201926	1q25.2
TC1600000011.oe.1	7.97e-05	up	2.24235	13.111	12.9715	12.5022	12.3201	12.8487	13.9783	13.8554	13.8527	14.1094	13.7828	lnc-ARHGDIG-1	LNCipedia Identified Transcript//NONCODE class 'Exonic', Ensembl Cross Reference: ENST00000496874 Name: ITFG3	---	---	---	lnc-ARHGDIG-1:2	NonCoding	NONHSAT051756	---	---	---	chr16	+	254122	259520	16p13.3
TC1700001901.oe.1	0.00416859	up	2.24225	6.92144	6.1148	5.40332	6.12879	6.07738	7.69716	6.82364	7.56448	7.41011	6.97508	lnc-CDRT1-1	NONCODE class 'Exonic', Ensembl Cross Reference: ENST00000473368 Name: TRIM16//LNCipedia Identified Transcript	---	---	---	lnc-CDRT1-1:1	NonCoding	NONHSAT145835	---	---	---	chr17	-	15631659	15632923	17p12
TC0400002521.oe.1	0.00259128	up	2.2419	6.89465	6.55139	6.30084	6.22559	6.71929	7.30379	7.35758	8.07404	8.46542	7.31454	lnc-SLC10A7-5	NONCODE class 'Exonic', Ensembl Cross Reference: ENST00000513840 Name: ZNF827//LNCipedia Identified Transcript	---	---	---	lnc-SLC10A7-5:1	NonCoding	NONHSAT098647	---	---	---	chr4	-	145876496	145885748	4q31.21
TC0100001260.oe.1	0.00108857	up	2.24174	7.81004	6.87271	7.00538	6.93391	7.01366	7.75401	8.40597	8.7264	8.21754	8.35487	lnc-CCDC18-3	LNCipedia Identified Transcript//NONCODE class 'Exonic', Ensembl Cross Reference: ENST00000481583 Name: DR1	---	---	---	lnc-CCDC18-3:1	NonCoding	NONHSAT004531	---	---	---	chr1	+	93354975	93360935	1p22.1
TC0300001437.oe.1	9.37e-05	up	2.23983	10.1225	10.176	10.0367	10.0024	10.3909	11.5646	11.3982	11.654	10.9747	10.9539	lnc-MFSD1-5	LNCipedia Identified Transcript//NONCODE class 'Exonic', Ensembl Cross Reference: ENST00000465235 Name: MFSD1//NONCODE class 'Exonic', Ensembl Cross Reference: ENST00000468409 Name: MFSD1//NONCODE class 'Exonic'	---	---	---	lnc-MFSD1-5:1	NonCoding	NONHSAT092951//NONHSAT092949//NONHSAT092950	---	---	---	chr3	+	158822443	158829719	3q25.32
TC0400000386.oe.1	0.02763	up	2.23844	6.99193	5.72072	5.81382	5.8141	6.40531	8.19696	7.4416	7.32341	6.01346	7.58294	lnc-CHRNA9-5	NONCODE class 'Sense No Exonic', Ensembl Cross Reference: ENST00000507378 Name: RP11-632F7.1//LNCipedia Identified Transcript	---	---	---	lnc-CHRNA9-5:1	NonCoding	NONHSAT096144	---	---	---	chr4	+	40786110	40786710	4p14
TC1200000398.oe.1	0.0193172	up	2.23492	10.1189	9.8619	9.49561	9.65355	9.58028	9.75545	10.8845	12.1195	11.1102	10.6417	lnc-REP15-2	LNCipedia Identified Transcript - Alternate transcript name(s): expReg_chr12_2616_+	---	---	---	lnc-REP15-2:1	NonCoding	---	---	---	---	chr12	+	27686290	27686584	12p11.22
TC1900000322.oe.1	0.0270844	up	2.23489	8.10385	6.30088	6.34113	6.11761	6.06326	7.24725	7.99567	8.13519	8.0511	7.29854	lnc-SMARCA4-2	NONCODE class 'Exonic', Ensembl Cross Reference: ENST00000558528 Name: LDLR//LNCipedia Identified Transcript	---	---	---	lnc-SMARCA4-2:1	NonCoding	NONHSAT061116	---	---	---	chr19	+	11106356	11107515	19p13.2
TC0600001357.oe.1	0.00183538	up	2.23305	4.44062	4.51799	4.76465	4.76437	5.48285	5.53585	5.80942	6.55882	5.77469	6.08678	lnc-HSF2-3	LNCipedia Identified Transcript - Alternate transcript name(s): l_3247_chr6:122280197-122324257_prostate	---	---	---	lnc-HSF2-3:1	NonCoding	---	---	---	---	chr6	+	121959052	122003111	6q22.31
TC0X00000365.oe.1	0.0349724	up	2.23173	12.5633	10.811	10.6421	11.0075	11.4612	11.2878	12.5895	12.6287	12.9698	12.8002	lnc-GSPT2-4	LNCipedia Identified Transcript//NONCODE class 'Exonic', Ensembl Cross Reference: ENST00000486579 Name: MAGED1	---	---	---	lnc-GSPT2-4:1	NonCoding	NONHSAT137062	---	---	---	chrX	+	51893640	51901560	Xp11.22
TC1100000722.oe.1	0.0149955	up	2.22876	7.75798	7.05301	6.46033	7.2308	7.20897	7.36144	8.81978	7.94051	9.11381	8.25676	lnc-FEN1-5	LNCipedia Identified Transcript//NONCODE class 'Antisense,Exonic', PubMed Identifer: PMID:22140575 brain_Pred6615	---	---	---	lnc-FEN1-5:1	NonCoding	NONHSAT021713	---	---	---	chr11	+	61816404	61867353	11q12.2
TC0100005093.oe.1	0.001019	up	2.22661	5.90114	5.66183	5.42942	5.56784	5.42726	6.6397	6.88005	7.50292	6.28016	6.45892	lnc-FAIM3-5	NONCODE Identified Transcript, Ensembl Cross Reference: ENST00000471071 Name: IL10//LNCipedia Identified Transcript//NONCODE class 'Exonic'	---	---	---	lnc-FAIM3-5:1	NonCoding	NONHSAT009082//NONHSAT009083	---	---	---	chr1	-	206768640	206772435	1q32.1
TC0900000818.oe.1	0.0214745	up	2.22595	5.85156	4.98848	4.81956	5.1915	4.99184	5.31067	6.65974	6.97572	7.0639	5.60501	lnc-COL15A1-2	NONCODE class 'Exonic', Ensembl Cross Reference: ENST00000467052 Name: COL15A1//LNCipedia Identified Transcript	---	---	---	lnc-COL15A1-2:1	NonCoding	NONHSAT133630	---	---	---	chr9	+	98943179	98944188	9q22.33
TC14000882.hg.4	0.00352588	up	2.22475	10.6755	10.6879	9.94106	10.1451	11.296	11.637	11.8186	11.4794	11.3483	12.2304	RPPH1	ribonuclease P RNA component H1	ENST00000516869//ENST00000554988	85495	---	---	NonCoding	---	---	uc001vxa.1	NR_002312	chr14	-	20343048	20343685	14q11.2
TC0200001300.oe.1	0.000446	up	2.22071	11.0588	10.2038	10.7279	10.6924	10.703	12.0538	11.6436	12.2932	11.6411	11.5094	lnc-RABL2A-8	NONCODE class 'Exonic', Ensembl Cross Reference: ENST00000478928 Name: ACTR3//LNCipedia Identified Transcript	---	---	---	lnc-RABL2A-8:1	NonCoding	NONHSAT073851	---	---	---	chr2	+	113950824	113958589	2q14.1
TC0800000420.oe.1	0.0357993	up	2.22022	7.51395	7.36374	8.41168	7.77701	8.34386	10.329	8.60906	9.5759	8.55285	8.09697	lnc-HTRA4-3	LNCipedia Identified Transcript//NONCODE class 'Exonic', Ensembl Cross Reference: ENST00000521382 Name: PLEKHA2	---	---	---	lnc-HTRA4-3:1	NonCoding	NONHSAT126133	---	---	---	chr8	+	38952266	38960913	8p11.22
TC1800001376.oe.1	0.00159353	up	2.22005	4.60605	4.49244	4.57066	4.32141	4.05175	6.06092	5.06708	6.10428	5.45369	5.10928	RP11-4B16.1	N/A	ENST00000624212.1	---	---	---	NonCoding	---	---	---	---	chr18	-	77108284	77110537	18q23
TC0900001724.oe.1	0.0134085	up	2.21948	9.20914	7.86775	8.87617	8.22782	9.50179	10.0004	9.58361	10.4702	9.31159	10.0679	lnc-FAM75A6-12	LNCipedia Identified Transcript//NONCODE class 'Linc', Ensembl Cross Reference: ENST00000377549 Name: RP11-475I24.1	---	---	---	lnc-FAM75A6-12:1	NonCoding	NONHSAT131384	---	---	---	chr9	-	42666563	42668886	9p11.1
TC0200001623.oe.1	0.00412311	up	2.2187	7.75002	7.72495	8.58595	8.09585	8.50054	10.0708	8.80784	9.4249	8.89427	9.2081	lnc-ARL6IP6-4	NONCODE class 'Exonic', Ensembl Cross Reference: ENST00000492942 Name: FMNL2//LNCipedia Identified Transcript	---	---	---	lnc-ARL6IP6-4:1	NonCoding	NONHSAT074981	---	---	---	chr2	+	152578621	152607653	2q23.3
TC1500002092.oe.1	0.0244254	up	2.21614	6.24667	5.66435	6.56821	6.09978	6.51547	8.59091	6.84963	7.57127	7.49845	6.32445	lnc-MRPL46.1-3	LNCipedia Identified Transcript//NONCODE class 'Exonic'	---	---	---	lnc-MRPL46.1-3:1	NonCoding	NONHSAT048160	---	---	---	chr15	-	88135191	88137488	15q25.3
TC2100000307.oe.1	0.00598008	up	2.21566	4.96165	4.26349	4.38094	4.14945	4.15034	6.00359	5.30259	5.19494	6.30228	4.84115	lnc-DSCR8-4	LNCipedia Identified Transcript//NONCODE class 'Sense No Exonic'	---	---	---	lnc-DSCR8-4:1	NonCoding	NONHSAT082085	---	---	---	chr21	+	38273476	38275519	21q22.13
TC1300000144.oe.1	0.00134744	up	2.21515	10.6212	9.91057	9.89311	9.72063	10.321	10.8512	11.4168	11.7244	10.8368	11.3744	lnc-GTF3A-2	LNCipedia Identified Transcript//NONCODE class 'Antisense,Exonic', Ensembl Cross Reference: ENST00000493903 Name: GTF3A//NONCODE class 'Antisense,Exonic', Ensembl Cross Reference: ENST00000482655 Name: GTF3A	---	---	---	lnc-GTF3A-2:2	NonCoding	NONHSAT032657//NONHSAT032655	---	---	---	chr13	+	27429213	27435821	13q12.2
TC01001074.hg.4	0.000232	up	2.21513	10.4031	10.9819	11.2187	10.7477	10.9249	12.2737	11.6952	12.3002	11.8347	11.9093	SRGAP2//SRGAP2B	SLIT-ROBO Rho GTPase activating protein 2//SLIT-ROBO Rho GTPase activating protein 2B	ENST00000467933	647135//23380	---	---	NonCoding	---	---	uc010oxm.1	NR_034178	chr1	+	143972461	144045862	1q32.1//1q21.1
TC2100000664.oe.1	0.000377	up	2.21367	10.0245	10.2602	9.87799	9.79712	10.4064	10.794	10.9783	11.6121	11.545	11.1689	lnc-CYYR1-6	LNCipedia Identified Transcript//NONCODE class 'Exonic', Ensembl Cross Reference: ENST00000462267 Name: APP//NONCODE class 'Exonic', Ensembl Cross Reference: ENST00000466453 Name: APP	---	---	---	lnc-CYYR1-6:1	NonCoding	NONHSAT081529//NONHSAT081528	---	---	---	chr21	-	26089511	26169429	21q21.3
TC1600000149.oe.1	0.0240862	up	2.21219	7.07586	5.91372	5.83283	5.91828	6.41876	6.44883	7.49116	8.49719	7.47433	6.9753	lnc-TNFRSF12A-1	NONCODE class 'Exonic', Ensembl Cross Reference: ENST00000571351 Name: TNFRSF12A//LNCipedia Identified Transcript	---	---	---	lnc-TNFRSF12A-1:1	NonCoding	NONHSAT147911	---	---	---	chr16	+	3020390	3022383	16p13.3
TC0400001279.oe.1	0.0069319	up	2.21195	4.28805	3.94982	4.78438	4.26397	4.90503	5.12495	4.9809	6.24127	5.39679	6.17392	lnc-ANXA10-4	LNCipedia Identified Transcript//NONCODE class 'Sense No Exonic'	---	---	---	lnc-ANXA10-4:1	NonCoding	NONHSAT099141	---	---	---	chr4	+	168775419	168778471	4q32.3
TC0300001453.oe.1	0.0139371	up	2.21116	10.8769	9.92712	10.3691	9.49134	10.6063	11.1664	11.5213	11.8136	10.4826	12.0109	lnc-C3orf80-2	LNCipedia Identified Transcript//NONCODE class 'Exonic', Ensembl Cross Reference: ENST00000494612 Name: SMC4	---	---	---	lnc-C3orf80-2:1	NonCoding	NONHSAT092991	---	---	---	chr3	+	160412022	160413583	3q25.33
TC1000000748.oe.1	0.0292702	up	2.20984	8.87876	7.46738	7.35336	6.7018	8.17445	8.51788	8.35354	9.60326	8.98983	8.83097	lnc-ADK-1	LNCipedia Identified Transcript//NONCODE class 'Exonic', Ensembl Cross Reference: ENST00000461383 Name: VCL	---	---	---	lnc-ADK-1:1	NonCoding	NONHSAT014047	---	---	---	chr10	+	74043091	74063890	10q22.2
TC0700000426.oe.1	0.0120174	up	2.2098	6.73732	5.83085	6.38869	6.7373	6.87333	7.42844	7.5153	8.77279	6.96891	7.60164	lnc-YAE1D1-2	LNCipedia Identified Transcript//NONCODE class 'Exonic', Ensembl Cross Reference: ENST00000466491 Name: RALA//NONCODE class 'Exonic', Ensembl Cross Reference: ENST00000468201 Name: RALA	---	---	---	lnc-YAE1D1-2:1	NonCoding	NONHSAT120217//NONHSAT120215	---	---	---	chr7	+	39623565	39706391	7p14.1
TC1900002688.oe.1	0.00183204	up	2.20953	6.29384	5.95059	6.74253	6.10554	5.76374	7.9598	7.1869	7.44489	6.85831	7.12505	lnc-LILRA3-1//NONHSAG026508	NONCODE class 'Exonic', Ensembl Cross Reference: ENST00000471216 Name: LILRB2//LNCipedia Identified Transcript//NONCODE class 'Exonic'	---	---	---	lnc-LILRA3-1:2//lnc-LILRA3-1:3	NonCoding	NONHSAT067892//NONHSAT067891	---	---	---	chr19	-	54279850	54280462	19q13.42
TC0100002370.oe.1	0.000788	up	2.20479	10.5544	10.064	10.4387	9.95857	10.5243	10.8262	11.7072	11.8807	11.4149	11.4142	lnc-PPFIA4-2	NONCODE class 'Exonic', Ensembl Cross Reference: ENST00000488097 Name: TMEM183A//LNCipedia Identified Transcript	---	---	---	lnc-PPFIA4-2:1	NonCoding	NONHSAT008864	---	---	---	chr1	+	203015840	203022961	1q32.1
TC1000001629.oe.1	0.000294	up	2.2047	7.03012	7.39574	6.90651	6.95139	7.20436	8.47768	8.22945	8.70522	7.78665	7.99205	lnc-ST8SIA6-4	NONCODE class 'Exonic', Ensembl Cross Reference: ENST00000471481 Name: PTPLA//LNCipedia Identified Transcript	---	---	---	lnc-ST8SIA6-4:1	NonCoding	NONHSAT011623	---	---	---	chr10	-	17594209	17603828	10p12.33
TC1000002511.oe.1	4.43e-05	up	2.20236	6.93972	6.495	6.89071	7.077	6.78528	7.66505	8.12919	8.26258	7.85752	7.96863	lnc-PDZD8-6	LNCipedia Identified Transcript - Alternate transcript name(s): expReg_chr10_8334_-	---	---	---	lnc-PDZD8-6:1	NonCoding	---	---	---	---	chr10	-	117271540	117272323	10q25.3
TC1600002313.oe.1	0.00265313	up	2.20208	6.09934	5.28144	4.9741	5.35603	5.27573	5.94353	6.6935	7.104	6.48975	6.4502	lnc-CMTM4-2	NONCODE class 'Exonic', Ensembl Cross Reference: ENST00000581487 Name: CMTM4//LNCipedia Identified Transcript	---	---	---	lnc-CMTM4-2:1	NonCoding	NONHSAT143029	---	---	---	chr16	-	66614750	66621775	16q22.1
TC1100000050.oe.1	0.000841	up	2.20104	6.86339	6.50247	6.5537	6.81372	6.81662	8.58151	7.50797	8.01009	7.66577	7.47549	lnc-MUC2-2	NONCODE class 'Exonic', Ensembl Cross Reference: ENST00000526376 Name: AP2A2//NONCODE class 'Exonic', Ensembl Cross Reference: ENST00000531497 Name: AP2A2//LNCipedia Identified Transcript//NONCODE class 'Exonic', Ensembl Cross Reference: ENST00000529427 Name: AP2A2	---	---	---	lnc-MUC2-2:1	NonCoding	NONHSAT017368//NONHSAT017366//NONHSAT017367	---	---	---	chr11	+	1003732	1010926	11p15.5
TC1100002206.oe.1	0.00349683	up	2.19848	7.99226	7.88154	7.62413	8.1476	8.0554	9.48576	8.58321	9.53214	9.48134	8.30101	lnc-PACSIN3-5	NONCODE class 'Exonic', Ensembl Cross Reference: ENST00000534752 Name: ACP2//LNCipedia Identified Transcript	---	---	---	lnc-PACSIN3-5:1	NonCoding	NONHSAT021220	---	---	---	chr11	-	47239309	47245576	11p11.2
TC1500001347.oe.1	0.0135581	up	2.19823	6.20249	6.14009	6.6977	6.98297	6.58655	6.49962	7.46068	8.01869	8.37602	7.93651	lnc-RASGRP1-10	LNCipedia Identified Transcript//NONCODE class 'Exonic', Ensembl Cross Reference: ENST00000559129 Name: MEIS2	---	---	---	lnc-RASGRP1-10:1	NonCoding	NONHSAT041686	---	---	---	chr15	-	37094516	37096191	15q14
TC1300000705.oe.1	0.00617962	up	2.19623	9.75331	8.13063	8.67066	8.37868	8.64039	9.86869	10.0998	10.1724	9.64314	9.46483	RP11-128N14.4	N/A	ENST00000614033.1	---	---	---	NonCoding	---	---	---	---	chr13	+	97437268	97437630	13q32.1
TC0500003153.oe.1	0.00505745	up	2.19593	7.80055	7.31213	7.63419	6.9227	8.03707	9.47137	8.64616	8.44561	8.11319	8.70445	lnc-RNF145-5	NONCODE class 'Exonic', Ensembl Cross Reference: ENST00000518323 Name: EBF1//LNCipedia Identified Transcript	---	---	---	lnc-RNF145-5:1	NonCoding	NONHSAT104806	---	---	---	chr5	-	158698641	158708009	5q33.3
TC1700001602.oe.1	0.0128858	up	2.19213	5.22964	4.14334	4.53351	4.504	4.6964	4.62056	6.02044	5.76512	5.88097	6.48145	lnc-GLOD4-3	LNCipedia Identified Transcript//NONCODE class 'Antisense', External ID: TCONS_00016273	---	---	---	lnc-GLOD4-3:1	NonCoding	NONHSAT144764	---	---	---	chr17	-	785877	792655	17p13.3
TC0100003889.oe.1	0.0151669	up	2.19073	4.91258	4.18615	4.19507	3.97797	4.48819	5.3904	5.6185	6.12103	4.27368	6.0134	lnc-RPE65-1	NONCODE class 'Exonic', Ensembl Cross Reference: ENST00000488146 Name: DEPDC1//LNCipedia Identified Transcript	---	---	---	lnc-RPE65-1:1	NonCoding	NONHSAT003823	---	---	---	chr1	-	68475574	68482238	1p31.3
TC0100003257.oe.1	0.0112143	up	2.18959	9.05262	7.13951	7.32855	7.55938	7.79826	8.82724	8.9879	9.00253	9.04313	8.67084	lnc-USP48-1	LNCipedia Identified Transcript//NONCODE class 'Antisense,Exonic', Ensembl Cross Reference: ENST00000481644 Name: HSPG2	---	---	---	lnc-USP48-1:1	NonCoding	NONHSAT001438	---	---	---	chr1	-	21823301	21824266	1p36.12
TC1900000819.oe.1	0.00275296	up	2.18779	5.97327	5.35127	6.04439	5.89593	6.02454	6.5842	6.57615	7.64068	6.68118	7.45455	lnc-ZNF382-3	NONCODE class 'Linc', External ID: TCONS_00019339 Name: CTD-3234P18.2, Ensembl Cross Reference: ENST00000585467 Name: CTD-3234P18.2//LNCipedia Identified Transcript//N/A	ENST00000585467	---	---	lnc-ZNF382-3:1	NonCoding	NONHSAT066025	---	---	---	chr19	+	36628793	36630190	19q13.12
TC0800002453.oe.1	0.00480104	up	2.18773	5.17077	5.51184	6.07077	5.69125	5.34675	7.16641	5.9063	7.2742	6.61616	6.47549	ASAP1-IT1	LNCipedia Identified Transcript//NONCODE class 'Sense No Exonic'//ASAP1 intronic transcript 1 (non-protein coding) (ASAP1-IT1), long non-coding RNA.	---	---	---	ASAP1-IT1:1	NonCoding	NONHSAT129152	---	---	NR_002765	chr8	-	130295355	130296533	8q24.21
TC0800000026.oe.1	0.010808	up	2.18695	8.32349	7.42986	7.44416	7.22314	8.09806	8.36476	8.44179	9.48151	9.4892	8.38606	lnc-KBTBD11-2	LNCipedia Identified Transcript//NONCODE class 'Exonic', Ensembl Cross Reference: ENST00000519641 Name: ARHGEF10	---	---	---	lnc-KBTBD11-2:1	NonCoding	NONHSAT124691	---	---	---	chr8	+	1923196	1923874	8p23.3
TC1600002519.oe.1	0.00847281	up	2.18645	5.06751	4.77164	4.18592	4.63249	4.40841	6.75017	5.18615	5.89863	5.68823	5.18575	lnc-C16orf61-5	NONCODE class 'Exonic', Ensembl Cross Reference: ENST00000567924 Name: CDYL2//LNCipedia Identified Transcript	---	---	---	lnc-C16orf61-5:1	NonCoding	NONHSAT143906	---	---	---	chr16	-	80632637	80633180	16q23.2
TC0200003165.oe.1	0.000162	up	2.18588	8.87585	8.77739	8.85593	8.86766	9.32483	9.93105	9.8775	10.3102	10.4785	9.7455	lnc-RTN4-1	LNCipedia Identified Transcript - Alternate transcript name(s): ENST00000513537	---	---	---	lnc-RTN4-1:1	NonCoding	---	---	---	---	chr2	-	54969600	54972018	2p16.1
TC1000002273.oe.1	0.00378352	up	2.18538	6.99435	6.1456	6.64338	6.54178	7.1905	7.13128	7.77898	8.42464	7.75861	8.06153	lnc-RBP4-4	LNCipedia Identified Transcript//NONCODE class 'Exonic', Ensembl Cross Reference: ENST00000474161 Name: MYOF	---	---	---	lnc-RBP4-4:1	NonCoding	NONHSAT015679	---	---	---	chr10	-	93323118	93323675	10q23.33
TC1400001097.oe.1	0.00344934	up	2.18482	7.35194	6.42482	6.48515	6.76793	6.85798	8.75659	7.58783	7.89721	7.68431	7.59944	LINC01296	NONCODE class 'Linc', External ID: TCONS_00010704 Name: CTD-2314B22.3, Ensembl Cross Reference: ENST00000546959 Name: CTD-2314B22.3//NONCODE class 'Linc', External ID: TCONS_00010696 Name: CTD-2314B22.3, Ensembl Cross Reference: ENST00000549813 Name: CTD-2314B22.3//NONCODE class 'Linc', External ID: TCONS_00010703//NONCODE class 'Linc', PubMed Identifer: PMID:22140575 mixed_Pred13421//LNCipedia I…	ENST00000549065//ENST00000546959	---	OTTHUMT00000409414.1//OTTHUMT00000409411.1//OTTHUMT00000409425.1//OTTHUMT00000409421.1	LINC01296:2	NonCoding	NONHSAT035510//NONHSAT035501//NONHSAT035506//NONHSAT035511//NONHSAT035504//NONHSAT035522//NONHSAT035499//NONHSAT035518//NONHSAT035517//NONHSAT035508//NONHSAT035521//NONHSAT140152//NONHSAT035505//NONHSAT035497//NONHSAT035519//NONHSAT035520	---	---	---	chr14	-	19244908	19337688	14q11.2
TC1400001876.oe.1	0.000787	up	2.1846	6.88119	6.70646	6.8153	7.46991	7.04533	8.05654	7.69987	8.73201	8.00641	8.06021	lnc-RPS6KA5-3	LNCipedia Identified Transcript//NONCODE class 'Exonic', Ensembl Cross Reference: ENST00000556749 Name: TTC7B	---	---	---	lnc-RPS6KA5-3:1	NonCoding	NONHSAT039247	---	---	---	chr14	-	90646948	90657447	14q32.11
TC1800001377.oe.1	0.0185474	up	2.18454	5.7787	4.68859	4.93193	4.81547	4.89151	6.40663	5.9151	7.28543	5.35611	5.77957	lnc-ZNF516-14	LNCipedia Identified Transcript - Alternate transcript name(s): l_1626_chr18:74837560-74839881_brain	---	---	---	lnc-ZNF516-14:1	NonCoding	---	---	---	---	chr18	-	77125605	77127925	18q23
TC1500000839.oe.1	0.0470926	up	2.18452	8.04072	6.7471	6.82887	6.85367	7.31943	7.78432	7.38473	9.80891	8.39537	8.05304	lnc-FAM108C1-2	LNCipedia Identified Transcript//NONCODE class 'Sense No Exonic', External ID: TCONS_00012683	---	---	---	lnc-FAM108C1-2:1	NonCoding	NONHSAT047713	---	---	---	chr15	+	80790554	80871067	15q25.1
TC1000002297.oe.1	0.0210909	up	2.18436	4.4201	4.70021	4.4555	4.10299	4.58712	6.3382	5.67607	5.37162	4.24188	6.27422	lnc-SORBS1-2	LNCipedia Identified Transcript//NONCODE class 'Exonic', Ensembl Cross Reference: ENST00000490391 Name: PDLIM1	---	---	---	lnc-SORBS1-2:1	NonCoding	NONHSAT015755	---	---	---	chr10	-	95238634	95247620	10q23.33
TC2000000945.oe.1	0.0444908	up	2.18387	5.03386	4.42616	4.4869	4.78411	4.13946	7.36341	4.93685	5.90297	5.23204	5.06965	lnc-CRNKL1-6	LNCipedia Identified Transcript//NONCODE class 'Sense No Exonic'	---	---	---	lnc-CRNKL1-6:1	NonCoding	NONHSAT078900	---	---	---	chr20	-	20408827	20410268	20p11.23
TC0300002360.oe.1	0.000306	up	2.18222	7.42165	6.94851	7.04464	7.23898	7.06187	8.87334	8.33493	8.13232	7.90053	8.10352	lnc-TUSC2-1	LNCipedia Identified Transcript//NONCODE class 'Exonic'	---	---	---	lnc-TUSC2-1:1	NonCoding	NONHSAT089823	---	---	---	chr3	-	50318102	50318357	3p21.31
TC0100003407.oe.1	0.0133328	up	2.18083	5.45726	5.56502	6.15319	5.86424	5.67526	6.39334	6.17226	6.74874	8.0931	6.93193	lnc-BAI2-3	LNCipedia Identified Transcript - Alternate transcript name(s): expReg_chr1_4885_-	---	---	---	lnc-BAI2-3:1	NonCoding	---	---	---	---	chr1	-	31687301	31687647	1p35.2
TC1700002918.oe.1	0.042423	up	2.18078	8.08822	8.03781	8.41678	7.11733	7.99278	10.1155	8.27463	9.88168	8.94254	8.06275	lnc-SLC25A19-1//OTTHUMG00000179609//NONHSAG022748//RP11-16C1.2	NONCODE class 'Sense No Exonic', External ID: TCONS_00015993 Name: RP11-16C1.2, Ensembl Cross Reference: ENST00000578539 Name: RP11-16C1.2//N/A//LNCipedia Identified Transcript - Alternate transcript name(s): RP11-16C1.2-001	ENST00000578539//ENST00000578539.1	---	OTTHUMT00000447300.1	lnc-SLC25A19-1:1	NonCoding	NONHSAT055887	---	---	---	chr17	-	75370947	75373736	17q25.1
TC0400000281.oe.1	0.00249634	up	2.17936	8.50195	8.68191	8.76971	8.94501	9.1022	10.425	9.43478	10.5661	9.67531	9.51906	lnc-TBC1D19-6	NONCODE class 'Exonic', Ensembl Cross Reference: ENST00000515023 Name: RBPJ//NONCODE class 'Exonic', Ensembl Cross Reference: ENST00000514656 Name: RBPJ//LNCipedia Identified Transcript//NONCODE class 'Exonic', Ensembl Cross Reference: ENST00000511451 Name: RBPJ//NONCODE class 'Exonic', Ensembl Cross Reference: ENST00000511401 Name: RBPJ	---	---	---	lnc-TBC1D19-6:1	NonCoding	NONHSAT095870//NONHSAT095873//NONHSAT095871//NONHSAT095872	---	---	---	chr4	+	26321014	26420838	4p15.2
TC1700002236.oe.1	0.000942	up	2.17926	5.97314	5.24748	5.1831	5.54849	5.58517	6.71208	6.69428	7.08342	6.02898	6.63782	NONHSAG021546//lnc-SLFN12-1//RP11-686D22.8	NONCODE class 'Linc', Ensembl Cross Reference: ENST00000590824 Name: RP11-686D22.7//LNCipedia Identified Transcript//NONCODE class 'Linc', External ID: TCONS_00017039 Name: RP11-686D22.8, Ensembl Cross Reference: ENST00000587012 Name: RP11-686D22.8//N/A//NONCODE class 'Linc', Ensembl Cross Reference: ENST00000590539 Name: RP11-686D22.3	ENST00000587012.1//ENST00000587012	---	---	lnc-SLFN12-1:3//lnc-SLFN12-1:2//lnc-SLFN12-1:1	NonCoding	NONHSAT053092//NONHSAT053093//NONHSAT053094	---	---	---	chr17	-	35406684	35410228	17q12
TC1400001861.oe.1	0.00162588	up	2.17662	7.12557	6.13917	6.63586	6.57752	6.48377	8.30165	7.85969	7.4194	7.2634	7.72821	lnc-RP11-944C7.1.1-3	LNCipedia Identified Transcript - Alternate transcript name(s): l_1032_chr14:90060670-90069922_testes	---	---	---	lnc-RP11-944C7.1.1-3:1	NonCoding	---	---	---	---	chr14	-	89594327	89603578	14q32.11
TC0200004468.oe.1	0.0172966	up	2.17496	4.1944	3.98844	4.3808	4.4382	4.25541	4.03874	5.39664	5.83184	6.20538	5.38958	lnc-SLC40A1-2	LNCipedia Identified Transcript//NONCODE class 'Linc', Ensembl Cross Reference: ENST00000449965 Name: AC013439.4	---	---	---	lnc-SLC40A1-2:1	NonCoding	NONHSAT076053	---	---	---	chr2	-	189486480	189487992	2q32.2
TC0100003217.oe.1	0.00947448	up	2.1748	7.88751	7.99742	7.37264	7.87657	8.33825	8.69604	8.60021	10.1269	9.07496	8.57874	lnc-AKR7A2-3	NONCODE class 'Exonic', Ensembl Cross Reference: ENST00000482808 Name: CAPZB//LNCipedia Identified Transcript//NONCODE class 'Exonic', Ensembl Cross Reference: ENST00000489607 Name: CAPZB	---	---	---	lnc-AKR7A2-3:1	NonCoding	NONHSAT001303//NONHSAT001304	---	---	---	chr1	-	19357522	19485488	1p36.13
TC0500000437.oe.1	0.00911598	up	2.17467	6.82646	6.83133	7.24964	7.36128	6.99022	9.087	7.47272	8.65543	7.58914	8.05859	lnc-ISL1-3	NONCODE class 'Exonic', Ensembl Cross Reference: ENST00000513414 Name: PARP8//LNCipedia Identified Transcript//NONCODE class 'Exonic', Ensembl Cross Reference: ENST00000510040 Name: PARP8//NONCODE class 'Exonic', Ensembl Cross Reference: ENST00000505180 Name: PARP8	---	---	---	lnc-ISL1-3:1	NonCoding	NONHSAT101371//NONHSAT101370//NONHSAT101369	---	---	---	chr5	+	50666761	50761900	5q11.1
TC0700002798.oe.1	0.00269992	up	2.17457	7.41732	7.62826	7.52784	6.5927	7.61157	8.36937	7.9749	8.72048	8.99702	8.31958	lnc-AC083862.1-1	LNCipedia Identified Transcript - Alternate transcript name(s): expReg_chr7_10145_-	---	---	---	lnc-AC083862.1-1:1	NonCoding	---	---	---	---	chr7	-	135159883	135160161	7q33
TC0800001510.oe.1	0.00011	up	2.17245	6.73859	6.2307	6.5059	6.51739	6.62545	7.89283	7.58697	8.00817	7.43151	7.29518	lnc-LGI3-1	NONCODE class 'Exonic', Ensembl Cross Reference: ENST00000519875 Name: REEP4//LNCipedia Identified Transcript	---	---	---	lnc-LGI3-1:1	NonCoding	NONHSAT125460	---	---	---	chr8	-	22139802	22141769	8p21.3
TC1200002852.oe.1	0.00125015	up	2.1723	6.89711	6.15527	6.4026	6.40067	6.51847	7.41962	7.62899	8.11204	7.84889	6.96067	lnc-SART3-2	LNCipedia Identified Transcript//NONCODE class 'Exonic'	---	---	---	lnc-SART3-2:1	NonCoding	NONHSAT030545	---	---	---	chr12	-	108288048	108290143	12q23.3
TC1100000224.oe.1	0.0139259	up	2.16969	5.01546	4.53749	4.78998	5.0759	4.98062	4.63142	6.30588	6.27575	6.45085	6.32301	lnc-MICALCL-4	LNCipedia Identified Transcript//NONCODE class 'Exonic', PubMed Identifer: PMID:22140575 brain_Pred5970	---	---	---	lnc-MICALCL-4:1	NonCoding	NONHSAT018043	---	---	---	chr11	+	12216294	12219528	11p15.3
TC1000000298.oe.1	0.000543	up	2.16917	5.72953	5.86824	5.37556	5.64891	5.5909	6.38518	7.00812	7.31769	6.35349	6.73437	lnc-PDSS1-4	LNCipedia Identified Transcript//NONCODE class 'Antisense'	---	---	---	lnc-PDSS1-4:1	NonCoding	NONHSAT011861	---	---	---	chr10	+	26755624	26756547	10p12.1
TC0400002353.oe.1	0.00994073	up	2.1689	5.63193	6.15182	6.37998	6.51906	6.63645	8.37676	7.21359	6.84901	6.88964	7.57506	lnc-FABP2-2	LNCipedia Identified Transcript//NONCODE class 'Exonic', Ensembl Cross Reference: ENST00000512494 Name: PDE5A	---	---	---	lnc-FABP2-2:1	NonCoding	NONHSAT098088	---	---	---	chr4	-	119502390	119505935	4q26
TC1200000396.oe.1	0.0210936	up	2.16869	10.5484	9.83482	9.85511	10.0455	10.5901	10.3302	11.104	12.5236	11.3467	11.1537	lnc-C12orf70-4	NONCODE class 'Exonic', Ensembl Cross Reference: ENST00000541633 Name: PPFIBP1//LNCipedia Identified Transcript	---	---	---	lnc-C12orf70-4:1	NonCoding	NONHSAT027442	---	---	---	chr12	+	27524174	27584418	12p11.23
TC0500001541.oe.1	0.0150828	up	2.16843	5.63585	5.50857	6.1448	5.44732	4.8224	6.98408	7.59145	6.28753	5.9362	6.34294	lnc-RARS-7	LNCipedia Identified Transcript//NONCODE class 'Exonic', Ensembl Cross Reference: ENST00000518204 Name: WWC1	---	---	---	lnc-RARS-7:1	NonCoding	NONHSAT104988	---	---	---	chr5	+	168467693	168469221	5q34
TC1800000615.oe.1	0.00326715	up	2.16747	6.20153	5.82629	6.10597	6.68991	6.95843	7.06118	7.57007	7.99167	7.10063	7.63862	lnc-DOK6-6	LNCipedia Identified Transcript//NONCODE class 'Exonic', Ensembl Cross Reference: ENST00000581103 Name: CCDC102B	---	---	---	lnc-DOK6-6:1	NonCoding	NONHSAT059743	---	---	---	chr18	+	68846395	68874965	18q22.1
TC1000002306.oe.1	0.014995	up	2.16737	4.74473	4.88349	4.93459	4.73853	4.81986	7.15208	5.42237	6.38603	5.39987	5.3406	lnc-BLNK-1	NONCODE Identified Transcript, Ensembl Cross Reference: ENST00000485193 Name: BLNK//B-cell linker (BLNK), transcript variant 7, non-coding RNA.//LNCipedia Identified Transcript//NONCODE Identified Transcript, Ensembl Cross Reference: ENST00000468252 Name: BLNK//NONCODE class 'Exonic'	---	---	---	lnc-BLNK-1:4	NonCoding	NONHSAT015807//NONHSAT015806//NONHSAT015808	---	---	NR_047681	chr10	-	96191699	96271516	10q24.1
TC0500002214.oe.1	0.00553896	up	2.1666	6.37896	5.97269	6.11733	5.27429	5.89157	7.86902	6.53491	7.1782	6.69905	6.93083	lnc-SLC38A9-5	NONCODE class 'Exonic'//NONCODE class 'Exonic', Ensembl Cross Reference: ENST00000502907 Name: PPAP2A//LNCipedia Identified Transcript//ring finger protein 138, E3 ubiquitin protein ligase pseudogene 1 (RNF138P1), non-coding RNA.//NONCODE class 'Exonic', Ensembl Cross Reference: ENST00000515132 Name: PPAP2A//NONCODE class 'Exonic', Ensembl Cross Reference: ENST00000502765 Name: RNF138P1	---	---	---	lnc-SLC38A9-5:2	NonCoding	NONHSAT101499//NONHSAT101498//NONHSAT101496//NONHSAT101500	---	---	NR_001575	chr5	-	55441906	55534964	5q11.2
TC0400000826.oe.1	0.00124767	up	2.16426	5.93587	5.60667	5.49783	5.0115	5.0369	6.03161	6.51748	6.4972	6.91961	6.69225	lnc-SGMS2-3	NONCODE class 'Exonic', Ensembl Cross Reference: ENST00000506462 Name: SGMS2//LNCipedia Identified Transcript//NONCODE class 'Exonic', Ensembl Cross Reference: ENST00000515332 Name: SGMS2	---	---	---	lnc-SGMS2-3:1	NonCoding	NONHSAT097722//NONHSAT097723	---	---	---	chr4	+	107824563	107895547	4q25
TC1100000880.oe.1	0.00416427	up	2.16408	6.56058	5.57778	6.20728	6.11717	6.37961	7.40684	6.98094	8.10803	7.08015	6.83522	lnc-RCE1-3	NONCODE class 'Exonic', Ensembl Cross Reference: ENST00000527352 Name: C11orf80//LNCipedia Identified Transcript//NONCODE class 'Exonic', Ensembl Cross Reference: ENST00000527368 Name: C11orf80	---	---	---	lnc-RCE1-3:1	NonCoding	NONHSAT022353//NONHSAT022351	---	---	---	chr11	+	66744774	66804168	11q13.2
TC1200002946.oe.1	0.000764	up	2.16397	5.39891	5.2013	5.66191	6.06251	5.19542	6.20646	6.76074	7.01352	6.49443	6.6133	lnc-TBX5-4	NONCODE Identified Transcript, Ensembl Cross Reference: ENST00000548503 Name: TBX3//LNCipedia Identified Transcript//NONCODE class 'Exonic'	---	---	---	lnc-TBX5-4:1	NonCoding	NONHSAT030888//NONHSAT030889	---	---	---	chr12	-	114677581	114680987	12q24.21
TC0X00001098.oe.1	0.000389	up	2.16377	4.56055	4.49859	4.30442	4.52611	4.46287	4.97439	5.36002	5.73673	5.84913	5.99999	lnc-ARHGAP6-5	LNCipedia Identified Transcript//NONCODE class 'Sense No Exonic'	---	---	---	lnc-ARHGAP6-5:1	NonCoding	NONHSAT136239	---	---	---	chrX	-	10498819	10500832	Xp22.2
TC0X00000011.oe.1	0.0217	up	2.16227	5.78733	5.6823	5.47214	5.75218	5.73546	7.75024	6.07191	7.71829	6.04759	6.40412	lnc-IL3RA-3	NONCODE class 'Exonic', Ensembl Cross Reference: ENST00000493312 Name: CSF2RA//NONCODE class 'Exonic', Ensembl Cross Reference: ENST00000478256 Name: CSF2RA//NONCODE class 'Exonic', Ensembl Cross Reference: ENST00000477940 Name: CSF2RA//LNCipedia Identified Transcript//NONCODE class 'Exonic', Ensembl Cross Reference: ENST00000491683 Name: CSF2RA//NONCODE class 'Exonic', Ensembl Cross Reference: E…	---	---	---	lnc-IL3RA-3:2	NonCoding	NONHSAT136048//NONHSAT136041//NONHSAT136043//NONHSAT136040//NONHSAT136042	---	---	---	chrX	+	1268814	1300543	Xp22.33
TC0900002040.oe.1	0.00480618	up	2.16181	9.04002	9.99866	10.0875	10.3561	10.2918	10.5927	11.3997	11.3709	10.776	11.1958	lnc-C9orf21-1	NONCODE class 'Exonic', Ensembl Cross Reference: ENST00000480920 Name: CDC14B//LNCipedia Identified Transcript//NONCODE class 'Exonic', Ensembl Cross Reference: ENST00000484948 Name: CDC14B//NONCODE class 'Exonic', Ensembl Cross Reference: ENST00000463547 Name: CDC14B	---	---	---	lnc-C9orf21-1:1	NonCoding	NONHSAT133436//NONHSAT133434//NONHSAT133435	---	---	---	chr9	-	96538627	96618743	9q22.33
TC0700000676.oe.1	0.000191	up	2.15997	7.4159	7.39833	7.59931	7.18014	7.47192	8.64414	8.04025	8.9743	8.62147	8.34051	lnc-CRCP-2	LNCipedia Identified Transcript - Alternate transcript name(s): l_3432_chr7:65769704-65771895_brain	---	---	---	lnc-CRCP-2:1	NonCoding	---	---	---	---	chr7	+	66304718	66306908	7q11.21
TC0200002467.oe.1	0.00988659	up	2.15954	9.61644	8.90293	8.99881	9.32282	9.60753	9.71652	10.9925	10.6183	10.995	9.67985	lnc-AC079135.1.1-8	NONCODE class 'Exonic', PubMed Identifer: PMID:22140575 mixed_Pred30941//LNCipedia Identified Transcript	---	---	---	lnc-AC079135.1.1-8:1	NonCoding	NONHSAT077609	---	---	---	chr2	+	236569825	236571618	2q37.3
TC0400002047.oe.1	0.00808293	up	2.15926	10.0816	9.3718	9.88188	9.85835	9.8984	10.0935	10.8636	11.6394	11.5281	10.5201	lnc-NUP54-2	LNCipedia Identified Transcript//NONCODE class 'Exonic', Ensembl Cross Reference: ENST00000502908 Name: SCARB2	---	---	---	lnc-NUP54-2:1	NonCoding	NONHSAT096989	---	---	---	chr4	-	76180735	76195845	4q21.1
TC1500000568.oe.1	0.00321969	up	2.15813	5.91532	5.79271	5.46148	6.06868	5.52084	6.46703	7.30559	7.47804	6.20389	6.85339	lnc-APH1B-1	LNCipedia Identified Transcript//NONCODE class 'Antisense', External ID: TCONS_00012646	---	---	---	lnc-APH1B-1:1	NonCoding	NONHSAT046604	---	---	---	chr15	+	63318726	63326407	15q22.2
TSUnmapped00001880.oe.1	0.00604039	up	2.15698	7.08074	6.60543	6.67471	6.265	6.57548	8.78681	7.48552	7.22654	7.67019	7.57734	lnc-POTEG-4	LNCipedia Identified Transcript	---	---	---	lnc-POTEG-4:21	NonCoding	---	---	---	---	---	---	---	---	---
TC1500002252.oe.1	0.00289889	up	2.15651	6.18236	6.0166	5.67422	6.35393	6.01617	6.43624	6.97598	7.32309	7.8949	7.15657	lnc-CHSY1-1	NONCODE class 'Linc', External ID: TCONS_00013320//LNCipedia Identified Transcript//gene_id XLOC_011614; transcript_id TCONS_00023840; oId TCONS_00004845; linc_name linc-LINS-4; tss_id TSS18204; class_code u; gene_name linc-LINS-4;	---	---	---	lnc-CHSY1-1:1	NonCoding	NONHSAT051155	TCONS_00023840	---	---	chr15	-	101169431	101171304	15q26.3
TC0700001861.oe.1	0.0212498	up	2.1561	8.80285	8.7032	9.06138	8.63899	9.02477	9.37352	9.36289	11.4038	9.95967	9.67345	lnc-FAM126A-5	NONCODE class 'Exonic', Ensembl Cross Reference: ENST00000465661 Name: FAM126A//LNCipedia Identified Transcript//NONCODE class 'Exonic', Ensembl Cross Reference: ENST00000477349 Name: FAM126A//NONCODE class 'Exonic', Ensembl Cross Reference: ENST00000467005 Name: FAM126A	---	---	---	lnc-FAM126A-5:1	NonCoding	NONHSAT119499//NONHSAT119500//NONHSAT119501	---	---	---	chr7	-	22976769	23014130	7p15.3
TC1000002221.oe.1	0.0102982	up	2.15507	7.25668	7.51329	6.97835	6.48583	7.85543	7.75936	8.12633	9.02041	8.72959	7.99257	lnc-MMRN2-1	LNCipedia Identified Transcript//NONCODE class 'Exonic', Ensembl Cross Reference: ENST00000474574 Name: GLUD1	---	---	---	lnc-MMRN2-1:1	NonCoding	NONHSAT015395	---	---	---	chr10	-	87060953	87067839	10q23.2
TC0100005450.oe.1	0.0286845	up	2.15091	4.74214	4.3605	4.67273	4.18788	4.32527	6.19447	6.47878	4.81359	4.42213	5.90428	lnc-GNG4-1	LNCipedia Identified Transcript//NONCODE class 'Exonic'	---	---	---	lnc-GNG4-1:1	NonCoding	NONHSAT010369	---	---	---	chr1	-	235547685	235549698	1q42.3
TC0700002383.oe.1	0.00858915	up	2.15066	7.69148	6.10546	7.0272	7.31811	7.45589	8.81582	8.24244	7.83901	8.09308	8.13167	lnc-CACNA2D1-1	LNCipedia Identified Transcript//NONCODE class 'Linc', PubMed Identifer: PMID:22140575 mixed_Pred44762 , PubMed Identifer: PMID:22140575 brain_Pred37350//NONCODE class 'Linc'	---	---	---	lnc-CACNA2D1-1:1	NonCoding	NONHSAT121765//NONHSAT121766	---	---	---	chr7	-	81946444	81949661	7q21.11
TC1200000045.oe.1	0.00211105	up	2.149	6.08662	6.29704	6.53072	6.37637	6.51289	7.73407	6.89227	8.22659	7.29184	7.17721	lnc-FKBP4-2	NONCODE class 'Exonic', Ensembl Cross Reference: ENST00000483136 Name: CACNA1C//LNCipedia Identified Transcript	---	---	---	lnc-FKBP4-2:1	NonCoding	NONHSAT025463	---	---	---	chr12	+	2641458	2651747	12p13.33
TC1400000232.oe.1	0.000758	up	2.14868	11.1751	11.2439	11.6129	11.2163	11.9041	12.76	12.5986	12.9144	12.0421	12.3543	lnc-RP11-173D9.3.1-5	LNCipedia Identified Transcript//NONCODE class 'Exonic', Ensembl Cross Reference: ENST00000555050 Name: PSMA6	---	---	---	lnc-RP11-173D9.3.1-5:1	NonCoding	NONHSAT036372	---	---	---	chr14	+	35308775	35310827	14q13.2
TC1200003195.oe.1	0.000478	up	2.14861	8.52389	8.29938	8.64361	8.24468	9.04088	9.17459	9.87295	9.86267	9.55324	9.80602	OTTHUMG00000168366//lnc-RIMBP2-4//RP11-989F5.3//NONHSAG012759	LNCipedia Identified Transcript - Alternate transcript name(s): RP11-989F5.3-001//NONCODE class 'Sense No Exonic', External ID: TCONS_00008017 Name: RP11-989F5.3, Ensembl Cross Reference: ENST00000542821 Name: RP11-989F5.3//N/A	ENST00000542821.1//ENST00000542821	---	OTTHUMT00000399459.1	lnc-RIMBP2-4:1	NonCoding	NONHSAT031986	---	---	---	chr12	-	130810821	130812622	12q24.33
TC0100003039.oe.1	0.00085	up	2.14662	6.95472	6.6252	7.08737	6.76472	6.71606	7.42939	8.20981	8.36896	7.49097	8.15929	lnc-RPL22-2	NONCODE class 'Exonic', Ensembl Cross Reference: ENST00000495791 Name: ICMT//LNCipedia Identified Transcript	---	---	---	lnc-RPL22-2:1	NonCoding	NONHSAT000634	---	---	---	chr1	-	6221898	6223502	1p36.31
TC1000000163.oe.1	0.0128189	up	2.14402	3.61968	3.14857	3.78106	3.53185	4.02363	5.30196	4.30981	5.55788	4.57161	3.86511	lnc-ECHDC3-6	LNCipedia Identified Transcript - Alternate transcript name(s): ucscGeneNc_uc001ikr_1	---	---	---	lnc-ECHDC3-6:1	NonCoding	---	---	---	---	chr10	+	11293797	11296670	10p14
TC1000000708.oe.1	0.000664	up	2.14349	4.56298	4.55802	4.25687	4.7484	4.01086	5.56107	4.95717	5.50786	5.89123	5.71959	RP11-354E23.3	N/A	ENST00000623520.1	---	---	---	NonCoding	---	---	---	---	chr10	+	72730557	72731175	10q22.1
TC0500002553.oe.1	0.0451244	up	2.14332	10.4438	8.78983	9.19273	8.91944	9.80939	9.96193	9.93127	11.7235	10.904	10.1338	lnc-AC027323.1-1	NONCODE class 'Exonic', Ensembl Cross Reference: ENST00000511391 Name: ARRDC3//LNCipedia Identified Transcript	---	---	---	lnc-AC027323.1-1:1	NonCoding	NONHSAT102758	---	---	---	chr5	-	91370798	91373845	5q14.3
TC0300002692.oe.1	0.047619	up	2.14302	12.0189	9.85478	9.62456	10.0162	10.3957	10.948	11.3509	11.3034	12.0944	11.7117	lnc-CCDC80-1	gene_id XLOC_003217; transcript_id TCONS_00006616; oId TCONS_00009863; linc_name linc-CCDC80-1; tss_id TSS5143; class_code .; gene_name linc-CCDC80-1;//NONCODE class 'Exonic', External ID: TCONS_00027618//NONCODE class 'Exonic', Ensembl Cross Reference: ENST00000480275 Name: CCDC80//NONCODE class 'Exonic', Ensembl Cross Reference: ENST00000469554 Name: CCDC80//LNCipedia Identified Transcript//NON…	---	---	---	lnc-CCDC80-1:1	NonCoding	NONHSAT091191//NONHSAT091190//NONHSAT091193//NONHSAT091189//NONHSAT091192	TCONS_00006616	---	---	chr3	-	112639400	112649611	3q13.2
TC0900000873.oe.1	0.000295	up	2.14275	8.43061	7.9858	8.42286	8.51861	8.75768	9.32493	9.42219	10.0225	9.31694	9.52632	lnc-FSD1L-3	LNCipedia Identified Transcript//NONCODE class 'Exonic', PubMed Identifer: PMID:22140575 mixed_Pred48482	---	---	---	lnc-FSD1L-3:1	NonCoding	NONHSAT133813	---	---	---	chr9	+	105244648	105391399	9q31.1
TC0500003154.oe.1	0.00976625	up	2.14067	5.39633	5.22338	5.89745	5.74879	5.72449	7.86952	6.54757	6.21095	6.29908	6.55365	lnc-RNF145-4	LNCipedia Identified Transcript - Alternate transcript name(s): uc_175_-	---	---	---	lnc-RNF145-4:1	NonCoding	---	---	---	---	chr5	-	158847408	158847657	5q33.3
TC1700001258.oe.1	0.00767298	up	2.13461	6.23044	6.51547	6.38777	6.1588	6.18052	8.42305	7.06887	7.486	6.58849	7.37644	lnc-NOL11-3	NONCODE class 'Exonic', Ensembl Cross Reference: ENST00000581923 Name: PITPNC1//LNCipedia Identified Transcript	---	---	---	lnc-NOL11-3:1	NonCoding	NONHSAT055428	---	---	---	chr17	+	67532905	67632421	17q24.2
TC0100004994.oe.1	0.00122449	up	2.13448	7.61961	6.64533	6.88568	6.85899	7.05309	7.73343	8.03157	8.53179	8.37685	7.85849	lnc-ZNF281-1	LNCipedia Identified Transcript//NONCODE class 'Linc'	---	---	---	lnc-ZNF281-1:1	NonCoding	NONHSAT008692	---	---	---	chr1	-	200404955	200406100	1q32.1
TC0500000700.oe.1	0.0181942	up	2.13286	3.66316	3.66874	3.13424	3.4469	3.48955	5.80919	3.66969	4.75896	4.19874	4.42995	lnc-F2R-4	LNCipedia Identified Transcript//NONCODE class 'Exonic', Ensembl Cross Reference: ENST00000504558 Name: IQGAP2	---	---	---	lnc-F2R-4:1	NonCoding	NONHSAT102242	---	---	---	chr5	+	76671870	76673781	5q13.3
TC0600002300.oe.1	0.00111133	up	2.13125	6.68998	6.11703	6.325	6.10163	6.51526	7.32026	7.59755	8.09878	7.09313	7.09769	lnc-NRM-1	NONCODE class 'Exonic', Ensembl Cross Reference: ENST00000482141 Name: NRM//LNCipedia Identified Transcript - Alternate transcript name(s): NR_073066//NONCODE class 'Exonic'//LNCipedia Identified Transcript//NONCODE class 'Exonic', Ensembl Cross Reference: ENST00000470733 Name: NRM//LNCipedia Identified Transcript - Alternate transcript name(s): NR_073065	---	---	---	lnc-NRM-1:1	NonCoding	NONHSAT108665//NONHSAT108664//NONHSAT108666	---	---	---	chr6	-	30688047	30691129	6p21.33
TC0400000282.oe.1	0.00348257	up	2.13074	8.9582	8.88797	9.17815	9.3825	9.38338	10.7567	9.55526	10.8387	10.1926	9.90373	lnc-TBC1D19-5	NONCODE class 'Exonic', Ensembl Cross Reference: ENST00000510725 Name: RBPJ//LNCipedia Identified Transcript	---	---	---	lnc-TBC1D19-5:1	NonCoding	NONHSAT095874	---	---	---	chr4	+	26428613	26430195	4p15.2
TC1200000704.oe.1	0.0425023	up	2.12863	7.42147	6.55098	7.17458	7.46943	7.94677	6.94339	8.61853	8.92497	9.17774	8.34824	OTTHUMG00000173080//NONHSAG011270//lnc-HOXC8-1//AC012531.25	NONCODE class 'Sense No Exonic', External ID: TCONS_00007340 Name: AC012531.25, Ensembl Cross Reference: ENST00000562848 Name: AC012531.25//LNCipedia Identified Transcript - Alternate transcript name(s): AC012531.25-001//N/A	ENST00000562848.1//ENST00000562848	---	OTTHUMT00000422086.1	lnc-HOXC8-1:1	NonCoding	NONHSAT028541	---	---	---	chr12	+	54019910	54022589	12q13.13
TC0300000368.oe.1	0.00995399	up	2.12717	6.45689	6.52473	6.72275	6.28796	6.58204	6.75925	7.17504	8.61741	7.87795	7.58939	lnc-ZNF621-3	gene_id XLOC_002623; transcript_id TCONS_00005997; oId TCONS_00009183; linc_name linc-CTNNB1-1; tss_id TSS4171; class_code u; gene_name linc-CTNNB1-1;//LNCipedia Identified Transcript - Alternate transcript name(s): FPKM1_group_21119_transcript_1//LNCipedia Identified Transcript//NONCODE class 'Linc', External ID: TCONS_00027211//NONCODE class 'Linc', PubMed Identifer: PMID:23818866 FPKM1_group_2…	---	---	---	lnc-ZNF621-3:1	NonCoding	NONHSAT089183//NONHSAT089184	TCONS_00005997	---	---	chr3	+	40872595	40875008	3p22.1
TC0300001563.oe.1	0.0119924	up	2.12713	8.3846	7.72557	8.73758	8.92368	8.69381	8.65391	9.46006	9.64916	10.1686	9.97808	lnc-NAALADL2-3	LNCipedia Identified Transcript//N/A	ENST00000608133	---	---	lnc-NAALADL2-3:1	NonCoding	---	---	---	---	chr3	+	175809764	175810552	3q26.31
TC1800000992.oe.1	0.0044123	up	2.12671	5.13125	4.48475	4.62242	4.29291	5.23022	6.32722	5.67089	6.32547	5.59777	5.28335	lnc-SS18-3	NONCODE class 'Antisense', Ensembl Cross Reference: ENST00000578364 Name: FAM60BP//LNCipedia Identified Transcript	---	---	---	lnc-SS18-3:1	NonCoding	NONHSAT058743	---	---	---	chr18	-	26255698	26256355	18q11.2
TC1500000920.oe.1	0.011065	up	2.12245	10.0372	8.79249	8.80987	8.32248	9.12301	9.93187	9.9661	10.4817	10.4912	9.64278	lnc-AGBL1-9	LNCipedia Identified Transcript//NONCODE class 'Exonic', Ensembl Cross Reference: ENST00000559391 Name: AKAP13	---	---	---	lnc-AGBL1-9:1	NonCoding	NONHSAT048095	---	---	---	chr15	+	85735599	85740562	15q25.3
TC17002893.hg.4	0.0114491	up	2.12211	8.93641	7.63536	7.42252	7.55208	7.69549	8.89569	8.4845	9.31156	9.39959	8.57801	USP32P2	novel transcript//ubiquitin specific peptidase 32 pseudogene 2	---	220594	OTTHUMT00000131967//OTTHUMT00000131968//OTTHUMT00000132084//OTTHUMT00000132083	---	NonCoding	---	AK308293	uc010cqe.3//uc010cqf.3	NR_003554	chr17	-	18511262	18528812	17p11.2
TC0800000969.oe.1	0.00490242	up	2.12116	5.60756	4.85067	5.17163	4.7288	4.9649	5.67526	6.15939	6.9349	5.65526	6.32301	lnc-ZFPM2-6	NONCODE class 'Sense No Exonic', Ensembl Cross Reference: ENST00000521963 Name: OXR1//LNCipedia Identified Transcript	---	---	---	lnc-ZFPM2-6:1	NonCoding	NONHSAT128254	---	---	---	chr8	+	106581004	106605204	8q23.1
TC0500001659.oe.1	9.72e-05	up	2.12017	7.63945	8.02649	7.68349	7.89243	7.92909	9.11149	9.0192	9.14506	8.89852	8.41758	lnc-EIF4E1B-3	LNCipedia Identified Transcript//NONCODE class 'Exonic'	---	---	---	lnc-EIF4E1B-3:1	NonCoding	NONHSAT105368	---	---	---	chr5	+	176647581	176652786	5q35.2
TC0400002323.oe.1	0.000249	up	2.11809	10.7018	10.1017	10.0587	10.2587	10.5975	11.3169	11.0455	11.7206	11.5361	11.5131	lnc-ARSJ-4	LNCipedia Identified Transcript//NONCODE class 'Exonic'	---	---	---	lnc-ARSJ-4:1	NonCoding	NONHSAT097901	---	---	---	chr4	-	113500466	113513358	4q26
TC1000002242.oe.1	0.00889246	up	2.11668	4.91866	4.5237	5.24698	5.405	5.15018	6.48176	5.37022	6.9594	5.78197	6.0602	lnc-ANKRD22-2	LNCipedia Identified Transcript - Alternate transcript name(s): refGeneNc_781_NR_028371	---	---	---	lnc-ANKRD22-2:1	NonCoding	---	---	---	---	chr10	-	88981405	88982955	10q23.31
TC0500000975.oe.1	0.000228	up	2.11565	7.21117	7.04466	7.08979	7.15846	7.33858	8.40776	7.81792	8.77077	8.02721	8.22451	lnc-MAN2A1-4	NONCODE class 'Exonic', Ensembl Cross Reference: ENST00000505313 Name: MAN2A1//NONCODE class 'Exonic', Ensembl Cross Reference: ENST00000513921 Name: MAN2A1//LNCipedia Identified Transcript//NONCODE class 'Exonic', Ensembl Cross Reference: ENST00000503970 Name: MAN2A1	---	---	---	lnc-MAN2A1-4:2	NonCoding	NONHSAT103153//NONHSAT103154//NONHSAT103152	---	---	---	chr5	+	109853581	109869625	5q21.3
TC0400002219.oe.1	0.015473	up	2.1143	5.96657	6.20008	6.5422	6.33915	6.18755	8.18449	7.40965	6.83169	6.32465	7.88599	lnc-EMCN-3	NONCODE class 'Exonic', Ensembl Cross Reference: ENST00000502327 Name: EMCN//NONCODE class 'Exonic', Ensembl Cross Reference: ENST00000506323 Name: EMCN//NONCODE class 'Exonic', Ensembl Cross Reference: ENST00000502744 Name: EMCN//LNCipedia Identified Transcript//NONCODE class 'Exonic', Ensembl Cross Reference: ENST00000512253 Name: EMCN//NONCODE class 'Exonic', Ensembl Cross Reference: ENST00000…	---	---	---	lnc-EMCN-3:2	NonCoding	NONHSAT097560//NONHSAT097561//NONHSAT097563//NONHSAT097562//NONHSAT097564	---	---	---	chr4	-	100446020	100880126	4q24
TC0600000757.oe.1	0.0322314	up	2.1141	7.46576	6.58638	6.83399	7.98342	6.7401	7.61341	8.1233	7.65457	9.40863	8.20997	lnc-FOXP4-3	NONCODE class 'Exonic', Ensembl Cross Reference: ENST00000471092 Name: MDFI//LNCipedia Identified Transcript	---	---	---	lnc-FOXP4-3:1	NonCoding	NONHSAT112748	---	---	---	chr6	+	41646254	41650112	6p21.1
TC1000000703.oe.1	0.0170474	up	2.1133	5.43594	6.19519	6.09301	5.56256	6.43464	7.92061	6.43592	7.58952	6.5327	6.64008	lnc-ANAPC16-3	NONCODE class 'Exonic', Ensembl Cross Reference: ENST00000471240 Name: DDIT4//LNCipedia Identified Transcript	---	---	---	lnc-ANAPC16-3:1	NonCoding	NONHSAT013915	---	---	---	chr10	+	72274019	72274635	10q22.1
TC0500002681.oe.1	7e-05	up	2.11291	6.06553	5.55571	5.8389	5.60736	5.85036	6.97517	7.17619	6.76694	6.88608	6.50963	lnc-C5orf13-1	NONCODE class 'Exonic', Ensembl Cross Reference: ENST00000502931 Name: STARD4//NONCODE class 'Exonic', Ensembl Cross Reference: ENST00000508215 Name: STARD4//LNCipedia Identified Transcript//NONCODE class 'Exonic', Ensembl Cross Reference: ENST00000511569 Name: STARD4//NONCODE class 'Exonic', Ensembl Cross Reference: ENST00000511436 Name: STARD4	---	---	---	lnc-C5orf13-1:1	NonCoding	NONHSAT103191//NONHSAT103192//NONHSAT103190//NONHSAT103193	---	---	---	chr5	-	111499585	111512535	5q22.1
TC0400002105.oe.1	0.00109416	up	2.11252	7.37645	6.88331	6.48434	6.43673	6.46136	7.99275	7.92829	7.58628	7.4636	8.06612	lnc-COQ2-3	NONCODE class 'Linc', PubMed Identifer: PMID:23818866 FPKM1_group_23667_transcr//LNCipedia Identified Transcript - Alternate transcript name(s): FPKM1_group_23667_transcript_1	---	---	---	lnc-COQ2-3:1	NonCoding	NONHSAT097208	---	---	---	chr4	-	83232606	83232939	4q21.23
TC1200001232.oe.1	0.0152902	up	2.11213	6.48692	6.0456	6.55244	6.40044	6.546	6.20076	8.06748	7.42492	7.91775	7.81399	lnc-C12orf75-5	LNCipedia Identified Transcript//NONCODE class 'Linc'	---	---	---	lnc-C12orf75-5:1	NonCoding	NONHSAT030457	---	---	---	chr12	+	105469861	105552892	12q23.3
TC0200002456.oe.1	0.00188593	up	2.11174	6.0181	6.22003	6.42486	5.80672	6.1173	6.69162	7.20088	7.98027	7.0986	7.00782	lnc-SH3BP4-4//NONHSAG030876//OTTHUMG00000153124//AGAP1-IT1	LNCipedia Identified Transcript - Alternate transcript name(s): AGAP1-IT1-001//NONCODE class 'Sense No Exonic', External ID: TCONS_00020490 Name: AGAP1-IT1, Ensembl Cross Reference: ENST00000440498 Name: AGAP1-IT1//AGAP1 intronic transcript 1 (non-protein coding) [Source:HGNC Symbol;Acc:HGNC:41427]	ENST00000440498.1//ENST00000440498	---	OTTHUMT00000329671.1	lnc-SH3BP4-4:1	NonCoding	NONHSAT077565	---	---	---	chr2	+	235505751	235507566	2q37.2
TC0500002145.oe.1	0.0142263	up	2.11112	7.56388	7.25247	7.67165	7.11342	8.18193	7.60362	9.30986	8.46015	8.85436	8.94538	lnc-PLCXD3-3	LNCipedia Identified Transcript//NONCODE class 'Exonic', Ensembl Cross Reference: ENST00000513081 Name: OXCT1	---	---	---	lnc-PLCXD3-3:1	NonCoding	NONHSAT101177	---	---	---	chr5	-	41749527	41794643	5p13.1
TC0400001203.oe.1	0.0313107	up	2.10849	4.30432	4.39574	4.60845	4.41831	4.24169	5.28508	4.43678	6.88337	5.69919	5.04514	lnc-GUCY1B3-2	NONCODE class 'Exonic', Ensembl Cross Reference: ENST00000510293 Name: TDO2//LNCipedia Identified Transcript	---	---	---	lnc-GUCY1B3-2:1	NonCoding	NONHSAT098937	---	---	---	chr4	+	155914341	155918859	4q32.1
TC1200000454.oe.1	0.00441403	up	2.10773	7.87731	6.95268	7.84144	7.60058	7.93598	8.72663	8.32955	9.43884	8.78765	8.30375	lnc-FGD4-3	LNCipedia Identified Transcript//NONCODE class 'Exonic', Ensembl Cross Reference: ENST00000552226 Name: BICD1	---	---	---	lnc-FGD4-3:1	NonCoding	NONHSAT027608	---	---	---	chr12	+	32337499	32339120	12p11.21
TC0200004349.oe.1	0.00643544	up	2.10759	6.46444	5.99863	6.0182	5.81689	6.10117	6.72103	6.89444	7.69035	7.92385	6.54761	lnc-WIPF1-2	NONCODE class 'Exonic', Ensembl Cross Reference: ENST00000497620 Name: GPR155//LNCipedia Identified Transcript	---	---	---	lnc-WIPF1-2:1	NonCoding	NONHSAT075564	---	---	---	chr2	-	174482873	174487000	2q31.1
TC0900000659.oe.1	0.0257101	up	2.10747	4.07956	4.41833	4.24406	4.10411	4.85339	6.60935	4.76501	5.93758	4.83298	4.9321	lnc-CTSL1-6	LNCipedia Identified Transcript//NONCODE class 'Exonic', Ensembl Cross Reference: ENST00000466188 Name: DAPK1//NONCODE class 'Exonic', Ensembl Cross Reference: ENST00000497743 Name: DAPK1	---	---	---	lnc-CTSL1-6:1	NonCoding	NONHSAT132865//NONHSAT132864	---	---	---	chr9	+	87657416	87681522	9q21.33
TC1100000450.oe.1	0.00462371	up	2.10746	7.28068	7.36993	7.59933	7.39601	7.91462	9.56908	8.24564	8.28796	8.26615	8.56923	lnc-EHF-6	NONCODE class 'Exonic', Ensembl Cross Reference: ENST00000534710 Name: CAT//LNCipedia Identified Transcript	---	---	---	lnc-EHF-6:1	NonCoding	NONHSAT018753	---	---	---	chr11	+	34470714	34472059	11p13
TC2200000011.oe.1	0.0023169	up	2.10743	6.7553	6.77377	6.7043	6.41344	6.65631	8.57203	7.73927	7.43118	7.16818	7.76987	LL22NC03-N14H11.1//lnc-AP000525.1-2	LNCipedia Identified Transcript//N/A	ENST00000608286.1//ENST00000608286	---	---	lnc-AP000525.1-2:1	NonCoding	---	---	---	---	chr22	+	15823197	15823890	22q11.1
TC0100003288.oe.1	0.0172858	up	2.10324	6.75764	4.91417	5.95918	6.31881	6.55385	6.89697	6.95806	7.74086	7.20829	7.06255	lnc-E2F2-1	LNCipedia Identified Transcript//NONCODE class 'Exonic', Ensembl Cross Reference: ENST00000463312 Name: ID3	---	---	---	lnc-E2F2-1:1	NonCoding	NONHSAT001530	---	---	---	chr1	-	23557934	23559075	1p36.12
TC1400001545.oe.1	0.0114573	up	2.10297	6.92789	5.94341	6.69049	7.50794	6.50352	7.59403	8.06121	8.1472	8.06885	7.06409	lnc-SIX1-2	LNCipedia Identified Transcript//NONCODE class 'Linc'	---	---	---	lnc-SIX1-2:1	NonCoding	NONHSAT037225	---	---	---	chr14	-	60638599	60644508	14q23.1
TC1000000159.oe.1	0.00415626	up	2.10227	3.97489	4.6811	4.41962	3.68128	4.40815	5.44685	5.16339	5.66547	5.66782	4.58125	lnc-ECHDC3-2	LNCipedia Identified Transcript//NONCODE class 'Sense No Exonic', External ID: TCONS_00003493//NONCODE class 'Sense No Exonic', Ensembl Cross Reference: ENST00000428853 Name: RP11-397O4.1//LNCipedia Identified Transcript - Alternate transcript name(s): RP11-397O4.1-001//N/A	ENST00000428853	---	OTTHUMT00000046751.1	lnc-ECHDC3-2:1	NonCoding	NONHSAT011399//NONHSAT011400	---	---	---	chr10	+	11030334	11030868	10p14
TC1100001583.oe.1	0.00160071	up	2.10136	8.01415	7.41852	6.90734	7.17137	7.10592	8.00039	8.40404	8.65892	8.24346	8.6671	lnc-STT3A-4	LNCipedia Identified Transcript//NONCODE class 'Exonic', Ensembl Cross Reference: ENST00000531062 Name: CHEK1	---	---	---	lnc-STT3A-4:1	NonCoding	NONHSAT024967	---	---	---	chr11	+	125633287	125636135	11q24.2
TC0700002156.oe.1	0.00708894	up	2.10032	11.3123	10.675	10.4566	10.539	10.7338	10.946	11.9013	12.2339	12.397	11.5915	lnc-SEPT14-5	LNCipedia Identified Transcript//NONCODE class 'Linc'	---	---	---	lnc-SEPT14-5:1	NonCoding	NONHSAT120692	---	---	---	chr7	-	55682775	55713252	7p11.2
TC0300001048.oe.1	0.0451772	up	2.09926	9.70221	7.93901	8.01763	7.70046	9.1092	8.80384	9.35173	10.0614	10.0095	9.59151	lnc-SEC22A-5	LNCipedia Identified Transcript//NONCODE class 'Exonic', Ensembl Cross Reference: ENST00000485208 Name: PDIA5//NONCODE class 'Exonic', Ensembl Cross Reference: ENST00000472319 Name: PDIA5	---	---	---	lnc-SEC22A-5:2	NonCoding	NONHSAT091514//NONHSAT091515	---	---	---	chr3	+	123124066	123150365	3q21.1
TC0300003214.oe.1	0.0172209	up	2.09884	6.48491	5.43099	5.39763	5.63608	6.18811	7.7153	6.22453	7.38617	6.7361	6.4236	lnc-AC078953.1-2	LNCipedia Identified Transcript//NONCODE class 'Sense No Exonic', Ensembl Cross Reference: ENST00000489995 Name: PLD1	---	---	---	lnc-AC078953.1-2:1	NonCoding	NONHSAT093233	---	---	---	chr3	-	171765129	171771385	3q26.31
TC0200000738.oe.1	0.0294383	up	2.09828	11.8619	11.0025	11.0575	11.0992	12.1253	11.3835	12.5019	13.3636	12.8891	12.3543	lnc-GKN1-1	NONCODE class 'Exonic', Ensembl Cross Reference: ENST00000481119 Name: ANTXR1//LNCipedia Identified Transcript//NONCODE class 'Exonic', Ensembl Cross Reference: ENST00000497197 Name: ANTXR1	---	---	---	lnc-GKN1-1:1	NonCoding	NONHSAT071329//NONHSAT071328	---	---	---	chr2	+	69077230	69103047	2p13.3
TC0800000342.oe.1	0.01343	up	2.09741	5.24501	5.22675	5.435	4.77204	5.59663	7.35787	5.6536	6.04646	6.67219	5.88834	CTD-2373N4.3//lnc-GS1-211B7.1.1-3//NONHSAG049904	LNCipedia Identified Transcript//NONCODE class 'Sense No Exonic'//N/A	ENST00000623026.1	---	---	lnc-GS1-211B7.1.1-3:1	NonCoding	NONHSAT125863	---	---	---	chr8	+	30552345	30553766	8p12
TC0600001210.oe.1	0.00538632	up	2.09626	4.29491	4.02624	4.21323	4.98773	4.60456	6.20928	5.54031	5.4063	4.7843	5.52555	lnc-AIM1-3//NONHSAG044497//RP1-134E15.3	LNCipedia Identified Transcript//NONCODE class 'Sense No Exonic', Ensembl Cross Reference: ENST00000602426 Name: RP1-134E15.3//N/A	ENST00000602426//ENST00000602426.1	---	---	lnc-AIM1-3:1	NonCoding	NONHSAT114227	---	---	---	chr6	+	106100140	106100593	6q21
TC1900001799.oe.1	0.00343879	up	2.09373	5.98201	5.64251	5.87737	5.95084	5.95536	7.61791	6.56996	7.15206	7.20806	6.19046	lnc-WDR83OS-3	NONCODE class 'Exonic', Ensembl Cross Reference: ENST00000495617 Name: MAN2B1//LNCipedia Identified Transcript//NONCODE class 'Exonic', Ensembl Cross Reference: ENST00000465830 Name: MAN2B1	---	---	---	lnc-WDR83OS-3:1	NonCoding	NONHSAT061267//NONHSAT061266	---	---	---	chr19	-	12656659	12659010	19p13.13
TC1100002472.oe.1	0.0405606	up	2.09347	9.85748	7.8574	9.19663	8.91467	9.46651	9.26413	10.1641	11.0081	10.0447	10.1412	lnc-CFL1-3	NONCODE class 'Exonic', Ensembl Cross Reference: ENST00000532648 Name: EFEMP2//LNCipedia Identified Transcript	---	---	---	lnc-CFL1-3:3	NonCoding	NONHSAT022237	---	---	---	chr11	-	65866565	65867667	11q13.1
TC1200002860.oe.1	0.00140731	up	2.09231	6.62495	6.13635	6.52508	5.79839	6.09641	6.9455	7.34057	7.48251	7.79972	6.93839	lnc-SSH1-1	Small nucleolar RNA SNORA40 [Source:RFAM;Acc:RF00561]//LNCipedia Identified Transcript - Alternate transcript name(s): OTTHUMT00000443295.1, RP11-423G4.9-001//NONCODE class 'Linc', External ID: TCONS_00007906 Name: SNORA40, Ensembl Cross Reference: ENST00000578927 Name: SNORA40	ENST00000578927	---	---	lnc-SSH1-1:1	NonCoding	NONHSAT030571	---	---	---	chr12	-	108778192	108780418	12q24.11
TC1200000652.oe.1	0.00986748	up	2.09216	5.91864	5.26995	5.23872	5.60841	5.21144	7.13632	5.75073	7.13575	5.99682	6.5525	lnc-NR4A1-1	NONCODE class 'Exonic', Ensembl Cross Reference: ENST00000547749 Name: GRASP//NONCODE class 'Exonic', Ensembl Cross Reference: ENST00000548505 Name: GRASP//LNCipedia Identified Transcript//NONCODE class 'Exonic', Ensembl Cross Reference: ENST00000550809 Name: GRASP	---	---	---	lnc-NR4A1-1:1	NonCoding	NONHSAT028319//NONHSAT028317//NONHSAT028318	---	---	---	chr12	+	52010911	52014531	12q13.13
TC2100000340.oe.1	0.0448298	up	2.09172	5.9833	6.45793	6.19583	5.29705	6.77079	6.54244	7.1311	8.6396	6.72528	6.98993	lnc-FAM3B-1//NONHSAG032894//OTTHUMG00000086745//BACE2-IT1	LNCipedia Identified Transcript - Alternate transcript name(s): BACE2-IT1-001//BACE2 intronic transcript 1 (non-protein coding) [Source:HGNC Symbol;Acc:HGNC:16024]//NONCODE class 'Antisense,Sense No Exonic', External ID: TCONS_00024481 Name: BACE2-IT1, Ensembl Cross Reference: ENST00000433378 Name: BACE2-IT1	ENST00000433378//ENST00000433378.1	---	OTTHUMT00000195068.1	lnc-FAM3B-1:1	NonCoding	NONHSAT082237	---	---	---	chr21	+	41180097	41180626	21q22.2
TC1200001810.oe.1	0.00938039	up	2.09111	7.46751	6.68853	7.6188	7.8459	8.05431	9.19508	7.96442	8.72972	8.76292	8.34425	lnc-RBP5-4	NONCODE class 'Exonic', Ensembl Cross Reference: ENST00000536092 Name: C1R//LNCipedia Identified Transcript	---	---	---	lnc-RBP5-4:1	NonCoding	NONHSAT026225	---	---	---	chr12	-	7091156	7092493	12p13.31
TC1000000707.oe.1	0.00991639	up	2.09095	7.69466	6.89179	6.71842	8.03505	7.40907	8.21637	7.75285	8.8863	8.73093	8.48332	lnc-OIT3-2	LNCipedia Identified Transcript - Alternate transcript name(s): ENST00000443299, OTTHUMT00000048592.1, RP11-354E23.2-001//NONCODE class 'Sense No Exonic', External ID: TCONS_00003620	---	---	---	lnc-OIT3-2:1	NonCoding	NONHSAT013930	---	---	---	chr10	+	72701449	72703339	10q22.1
TC0100002405.oe.1	0.00711193	up	2.09069	6.64319	6.33993	6.35066	5.95362	6.61761	6.95234	7.44079	8.3568	7.61771	6.85727	lnc-CNTN2-6	LNCipedia Identified Transcript//NONCODE class 'Exonic', Ensembl Cross Reference: ENST00000493914 Name: NFASC	---	---	---	lnc-CNTN2-6:1	NonCoding	NONHSAT008972	---	---	---	chr1	+	204870604	204945032	1q32.1
TC1600000312.oe.1	0.00304141	up	2.08909	6.79218	6.20818	6.82273	6.33667	6.56427	8.28734	7.48942	7.05016	7.28535	7.92613	lnc-MKL2-2	LNCipedia Identified Transcript//NONCODE class 'Exonic', Ensembl Cross Reference: ENST00000546067 Name: AC040173.1	---	---	---	lnc-MKL2-2:1	NonCoding	NONHSAT140674	---	---	---	chr16	+	14265490	14266772	16p13.12
TC1100000802.oe.1	0.000731	up	2.08877	8.42736	8.11731	8.35869	8.22551	8.8186	9.14823	9.46752	9.97205	9.58912	9.08382	lnc-SPDYC-3	NONCODE class 'Exonic', Ensembl Cross Reference: ENST00000527887 Name: CAPN1//LNCipedia Identified Transcript	---	---	---	lnc-SPDYC-3:1	NonCoding	NONHSAT022096	---	---	---	chr11	+	65188245	65188689	11q13.1
TC0400002096.oe.1	0.0193904	up	2.08839	4.51471	4.5675	4.99988	4.85784	4.58445	7.16451	5.42183	5.31009	5.3801	5.55979	lnc-TMEM150C-6	LNCipedia Identified Transcript - Alternate transcript name(s): expReg_chr4_3930_-	---	---	---	lnc-TMEM150C-6:1	NonCoding	---	---	---	---	chr4	-	82649270	82649531	4q21.22
TC1200000649.oe.1	0.000756	up	2.0878	6.00104	6.35485	6.3466	6.37099	6.37643	7.44306	7.21624	7.95293	6.78683	7.36079	lnc-ACVRL1-1	NONCODE Identified Transcript, Ensembl Cross Reference: ENST00000550084 Name: ACVRL1//LNCipedia Identified Transcript//NONCODE class 'Exonic'	---	---	---	lnc-ACVRL1-1:3	NonCoding	NONHSAT028311//NONHSAT028312	---	---	---	chr12	+	51921401	51923361	12q13.13
TC0400000307.oe.1	0.0286216	up	2.08733	4.91431	4.95853	5.07033	5.04033	4.82803	7.13637	5.8527	5.10893	5.29205	6.72979	lnc-STIM2-11	NONCODE class 'Exonic', Ensembl Cross Reference: ENST00000509925 Name: PCDH7//NONCODE class 'Exonic', Ensembl Cross Reference: ENST00000509759 Name: PCDH7//LNCipedia Identified Transcript	---	---	---	lnc-STIM2-11:1	NonCoding	NONHSAT095937//NONHSAT095938	---	---	---	chr4	+	30920153	31142731	4p15.1
[truncated: 90 more rows]

## Sheet: OA VS N _NonCoding_down
Probe Set ID	p ([OA] Vs [N])	Regulation ([OA] Vs [N])	FC ([OA] Vs [N])	[N2](normalized)	[N3](normalized)	[N4](normalized)	[N5](normalized)	[N6](normalized)	[OA1](normalized)	[OA10](normalized)	[OA15](normalized)	[OA17](normalized)	[OA9](normalized)	GeneSymbol	Description	EnsemblID	EntrezGeneID	HAVANAID	lncipediaID	locus type	NonCodeID	OtherDatabaseID	UCSCID	RefSeqID	Chr	strand	start	stop	Cytoband
[truncated: 905 more rows]
