# Supplementary material for: lnc-SAMD14-4 can regulate expression of the COL1A1 and COL1A2 in human chondrocytes
Source: PeerJ. 2019 Sep 2;7:e7491. doi: 10.7717/peerj.7491 (PMC6727836; doi:10.7717/peerj.7491)
Supplement: Table S6 [file peerj-07-7491-s012.xlsx]

## Sheet: Supplementary Table 5
Term_ID	Term_description	Term_url	ListHit	ListTotal	PopHit	PopTotal	FoldEnrichment	Genes	GeneSymbols	P_value	"-log10(pvalue)"	FDR_bh
GO:0070062	extracellular exosome	http://amigo.geneontology.org/amigo/term/GO:0070062	336	1196	2758	17682	2.11413	11326;90952;284207;59;392;3337;10678;55233;10672;2212;4637;4318;7334;3684;1291;22948;4082;526;160428;1476;2876;2885;3956;5339;5880;54622;83716;89853;1845;4627;54757;58986;1499;5420;6714;10159;5175;6275;23114;64175;54331;1012;550;11098;348654;4311;10890;10092;5594;953;10404;376267;25797;51715;5793;7345;1306;3014;55107;9943;5351;8340;6281;1000;2896;9114;3426;483;951;1636;8407;57406;5476;8404;4893;6…	VSIG4;ESAM;METRNL;ACTA2;ARHGAP1;DNAJB1;B3GNT2;MOB1A;GNA13;FCGR2A;MYL6;MMP9;UBE2N;ITGAM;COL6A1;CCT5;MARCKS;ATP6V1B2;ALDH1L2;CSTB;GPX1;GRB2;LGALS1;PLEC;RAC2;ARL15;CRISPLD2;MVB12B;DUSP3;MYH9;FAM20A;TMEM8A;CTNNB1;PODXL;SRC;ATP6AP2;PECAM1;S100A4;NFASC;P3H1;GNG2;CDH13;AUP1;PRSS23;GEN1;MME;RAB10;ARPC5;MAPK1;ENTPD1;CPQ;RAB15;QPCT;RAB23;PTPRG;UCHL1;COL15A1;H2AFX;ANO1;OXSR1;PLOD1;HIST1H2BL;S100A10;CDH2;GRN…	4.11e-26	25.3858	1.79e-23
GO:0005925	focal adhesion	http://amigo.geneontology.org/amigo/term/GO:0005925	87	1196	387	17682	3.50588	2022;5756;10672;1466;4082;5339;5880;4323;90102;83478;4627;9124;1499;23114;1012;4311;10890;10092;5594;3371;10395;1000;2697;54518;2195;1803;50507;7171;3685;5159;58504;3936;2191;8829;960;7070;57514;7430;30011;3339;8754;3984;9019;9902;387;3688;23545;5898;22801;1072;847;950;824;55740;23022;87;2316;79834;3611;7791;51056;8496;23603;5216;55679;6641;391;5328;8321;3693;10487;998;382;5501;10867;5329;5788;36…	ENG;TWF1;GNA13;CSRP2;MARCKS;PLEC;RAC2;MMP14;PHLDB2;ARHGAP24;MYH9;PDLIM1;CTNNB1;NFASC;CDH13;MME;RAB10;ARPC5;MAPK1;TNC;DLC1;CDH2;GJA1;APBB1IP;FAT1;DPP4;NOX4;TPM4;ITGAV;PDGFRB;ARHGAP22;LCP1;FAP;NRP1;CD44;THY1;ARHGAP31;EZR;SH3KBP1;HSPG2;ADAM9;LIMK1;MPZL1;MRC2;RHOA;ITGB1;ATP6V0A2;RALA;ITGA11;CFL1;CAT;SCARB2;CAPN2;ENAH;PALLD;ACTN1;FLNA;PEAK1;ILK;ZYX;LAP3;PPFIBP1;CORO1C;PFN1;LIMS2;SNTB1;RHOG;PLAU;FZD1;I…	1.17e-19	18.9313	2.54e-17
GO:0005886	plasma membrane	http://amigo.geneontology.org/amigo/term/GO:0005886	394	1196	3788	17682	1.80194	4064;90952;10154;1742;5205;392;5099;10672;2212;7099;11309;5728;3684;2359;4082;5732;7082;118788;526;50856;3455;867;2885;409;1002;2042;2207;5339;3762;5880;4323;90102;6678;89853;4325;4627;641700;5097;886;58986;387509;1499;5420;6714;54209;10159;5175;7046;51705;23114;57561;775;161;54331;1012;51330;4311;10890;953;57575;376267;10736;51715;7345;5737;115677;91010;1003;2537;100506658;55107;6376;8477;8038;1…	CD180;ESAM;PLXNC1;DLG4;ATP8B1;ARHGAP1;PCDH7;GNA13;FCGR2A;TLR4;SLCO2B1;PTEN;ITGAM;FPR3;MARCKS;PTGER2;TJP1;PIK3AP1;ATP6V1B2;CLEC4A;IFNAR2;CBL;GRB2;ARRB2;CDH4;EPHA3;FCER1G;PLEC;KCNJ5;RAC2;MMP14;PHLDB2;SPARC;MVB12B;MMP16;MYH9;ECSCR;PCDH1;CCKAR;TMEM8A;GPR153;CTNNB1;PODXL;SRC;TREM2;ATP6AP2;PECAM1;TGFBR1;EMCN;NFASC;ARRDC3;CACNA1C;AP2A2;GNG2;CDH13;TNFRSF12A;MME;RAB10;ENTPD1;PCDH10;RAB15;SIX2;RAB23;UCHL1;…	4.27e-19	18.3699	6.17e-17
GO:0005615	extracellular space	http://amigo.geneontology.org/amigo/term/GO:0005615	172	1196	1243	17682	2.22143	284207;59;2022;4318;79887;3684;1476;3455;3956;6695;3162;6678;6357;5764;5420;5175;6275;1012;3371;10404;9235;6586;205428;1306;10418;6376;10220;4313;4015;2896;3426;1636;8404;6398;1513;7127;9353;8839;2170;3554;2152;717;6387;123920;114897;6352;1278;9507;3486;266727;649;29923;1280;3625;7123;1359;5176;3936;656;1303;10911;2191;5806;8829;6347;56999;1893;8635;5054;6424;54918;5125;1470;871;7167;23213;1522;7…	METRNL;ACTA2;ENG;MMP9;PLBD1;ITGAM;CSTB;IFNAR2;LGALS1;SPOCK1;HMOX1;SPARC;CCL13;PTN;PODXL;PECAM1;S100A4;CDH13;TNC;CPQ;IL32;SLIT3;C3orf58;COL15A1;SPON1;CX3CL1;GDF11;MMP2;LOX;GRN;CFI;ACE;SPARCL1;SECTM1;CTSK;TNFAIP2;SLIT2;WISP2;FABP3;IL1R1;F3;C2;CXCL12;CMTM3;C1QTNF1;CCL5;COL1A2;ADAMTS4;IGFBP3;MDGA1;BMP1;HILPDA;COL2A1;INHBB;CLEC3B;CPA3;SERPINF1;LCP1;BMP8B;COL12A1;UTS2;FAP;PTX3;NRP1;CCL2;ADAMTS9;ECM1;RN…	1.99e-17	16.7006	2.16e-15
GO:0031012	extracellular matrix	http://amigo.geneontology.org/amigo/term/GO:0031012	50	1196	168	17682	4.54843	1291;1282;3956;4323;3371;1306;10418;1289;81578;11117;2152;1278;81792;9507;1280;4052;7123;5176;1303;56999;1893;5054;1284;4811;3339;1277;1293;375790;22795;3915;7177;1462;2200;1805;10516;6423;3611;284217;7373;1292;10631;2255;302;3912;3490;5327;6422;4016;5118;3910	COL6A1;COL4A1;LGALS1;MMP14;TNC;COL15A1;SPON1;COL5A1;COL21A1;EMILIN1;F3;COL1A2;ADAMTS12;ADAMTS4;COL2A1;LTBP1;CLEC3B;SERPINF1;COL12A1;ADAMTS9;ECM1;SERPINE1;COL4A2;NID1;HSPG2;COL1A1;COL6A3;AGRN;NID2;LAMC1;TPSAB1;VCAN;FBN1;DPT;FBLN5;SFRP2;ILK;LAMA1;COL14A1;COL6A2;POSTN;FGF10;ANXA2;LAMB1;IGFBP7;PLAT;SFRP1;LOXL1;PCOLCE;LAMA4	9.07e-16	15.0422	7.88e-14
GO:0009986	cell surface	http://amigo.geneontology.org/amigo/term/GO:0009986	83	1196	515	17682	2.48582	2022;7099;3684;3956;2207;6678;4325;51330;6376;221395;2896;1756;6507;9353;355;3554;25960;2205;2152;1803;3122;83483;29923;3685;5159;81619;963;2191;7305;94;4684;960;6424;51393;23213;7132;84168;948;8754;965;9019;23621;3688;1436;5898;375790;4038;57136;972;3776;196527;56650;942;2350;5796;10268;4360;10288;81029;3679;728;5328;8321;4758;3693;84868;135228;2255;56034;302;10788;5788;8406;3690;5327;6422;10979…	ENG;TLR4;ITGAM;LGALS1;FCER1G;SPARC;MMP16;TNFRSF12A;CX3CL1;ADGRF5;GRN;DMD;SLC1A3;SLIT2;FAS;IL1R1;ADGRA2;FCER1A;F3;DPP4;HLA-DRA;PLVAP;HILPDA;ITGAV;PDGFRB;TSPAN14;CD53;FAP;TYROBP;ACVRL1;NCAM1;CD44;SFRP4;TRPV2;SULF1;TNFRSF1A;ANTXR1;CD36;ADAM9;CD58;MPZL1;BACE1;ITGB1;CSF1R;RALA;AGRN;LRP4;APMAP;CD74;KCNK2;ANO6;CLDND1;CD86;FOLR2;PTPRK;RAMP3;MRC1;LILRB2;WNT5B;ITGA7;C5AR1;PLAU;FZD1;NEU1;ITGB5;HAVCR2;CD109;…	1.01e-11	10.9949	7.32e-10
GO:0005887	integral component of plasma membrane	http://amigo.geneontology.org/amigo/term/GO:0005887	152	1196	1355	17682	1.75433	5205;5099;2615;7099;145389;5732;23432;50856;3455;1002;2042;2207;3762;4323;79953;9201;4325;5097;886;58986;10871;5420;4311;953;5793;5737;23596;9120;8477;10457;1240;5803;10261;2697;9976;9056;185;25780;7107;187;3554;2205;2195;8611;10894;114897;9369;3122;2561;144195;1880;4363;4481;1536;6536;3118;3685;5787;4916;340273;911;3459;3460;7305;58494;8685;94;6443;960;940;6515;23166;7070;51393;26266;7132;948;50…	ATP8B1;PCDH7;LRRC32;TLR4;SLC38A6;PTGER2;GPR161;CLEC4A;IFNAR2;CDH4;EPHA3;FCER1G;KCNJ5;MMP14;SYNDIG1;DCLK1;MMP16;PCDH1;CCKAR;TMEM8A;CD300C;PODXL;MME;ENTPD1;PTPRG;PTGFR;OPN3;SLC16A6;GPR65;GPNMB;CMKLR1;PTPRZ1;IGSF6;GJA1;CLEC2B;SLC7A7;AGTR1;RASGRP3;GPR137B;APLNR;IL1R1;FCER1A;FAT1;PPAP2A;LYVE1;C1QTNF1;NRXN3;HLA-DRA;GABRB2;SLC2A14;GPR183;ABCC1;MSR1;CYBB;SLC6A9;HLA-DQA2;ITGAV;PTPRB;NTRK3;ABCB5;CD1C;IFNGR…	3.87e-09	8.41224	2.4e-07
GO:0005578	proteinaceous extracellular matrix	http://amigo.geneontology.org/amigo/term/GO:0005578	46	1196	241	17682	2.89477	4318;3956;129080;6695;169611;83716;4325;64175;10418;4313;4015;5803;8404;81578;8839;11117;9509;81792;9507;1297;649;4327;4052;56999;1893;255631;1293;1462;2200;256691;2239;1805;10516;145864;249;284217;81029;7373;57124;1292;10631;127435;170690;51129;6422;8840	MMP9;LGALS1;EMID1;SPOCK1;OLFML2A;CRISPLD2;MMP16;P3H1;SPON1;MMP2;LOX;PTPRZ1;SPARCL1;COL21A1;WISP2;EMILIN1;ADAMTS2;ADAMTS12;ADAMTS4;COL9A1;BMP1;MMP19;LTBP1;ADAMTS9;ECM1;COL24A1;COL6A3;VCAN;FBN1;MAMDC2;GPC4;DPT;FBLN5;HAPLN3;ALPL;LAMA1;WNT5B;COL14A1;CD248;COL6A2;POSTN;PODN;ADAMTS16;ANGPTL4;SFRP1;WISP1	5.35e-09	8.27171	2.9e-07
GO:0009897	external side of plasma membrane	http://amigo.geneontology.org/amigo/term/GO:0009897	40	1196	197	17682	3.07115	2022;7099;3684;2207;3762;10159;1012;55107;1636;355;2205;6387;3824;3575;118429;8482;3685;4684;960;940;1889;7070;948;5027;9890;3688;3604;972;3127;947;2239;942;290;3569;5104;1508;3791;1230;5788;1901	ENG;TLR4;ITGAM;FCER1G;KCNJ5;ATP6AP2;CDH13;ANO1;ACE;FAS;FCER1A;CXCL12;KLRD1;IL7R;ANTXR2;SEMA7A;ITGAV;NCAM1;CD44;CD28;ECE1;THY1;CD36;P2RX7;LPPR4;ITGB1;TNFRSF9;CD74;HLA-DRB5;CD34;GPC4;CD86;ANPEP;IL6;SERPINA5;CTSB;KDR;CCR1;PTPRC;S1PR1	1.2e-08	7.91936	5.81e-07
GO:0001726	ruffle	http://amigo.geneontology.org/amigo/term/GO:0001726	23	1196	90	17682	3.83268	392;81930;526;4627;5420;51330;8522;64092;1021;7456;89846;3936;7430;3688;23022;87;4651;4646;6282;9265;382;302;5058	ARHGAP1;KIF18A;ATP6V1B2;MYH9;PODXL;TNFRSF12A;GAS7;SAMSN1;CDK6;WIPF1;FGD3;LCP1;EZR;ITGB1;PALLD;ACTN1;MYO10;MYO6;S100A11;CYTH3;ARF6;ANXA2;PAK1	5.3e-07	6.27577	2.3e-05
GO:0001725	stress fiber	http://amigo.geneontology.org/amigo/term/GO:0001725	17	1196	53	17682	4.79609	4627;29109;50507;7171;55752;3936;22885;4628;10627;7168;55740;87;3611;7791;7170;10979;10398	MYH9;FHOD1;NOX4;TPM4;SEPT11;LCP1;ABLIM3;MYH10;MYL12A;TPM1;ENAH;ACTN1;ILK;ZYX;TPM3;FERMT2;MYL9	1.22e-06	5.91429	4.81e-05
GO:0005604	basement membrane	http://amigo.geneontology.org/amigo/term/GO:0005604	20	1196	75	17682	3.99252	1282;6678;3371;7058;1289;1280;5176;9510;4811;22795;30008;3915;2200;284217;302;1471;3912;151887;4016;3910	COL4A1;SPARC;TNC;THBS2;COL5A1;COL2A1;SERPINF1;ADAMTS1;NID1;NID2;EFEMP2;LAMC1;FBN1;LAMA1;ANXA2;CST3;LAMB1;CCDC80;LOXL1;LAMA4	1.65e-06	5.78171	5.98e-05
GO:0005764	lysosome	http://amigo.geneontology.org/amigo/term/GO:0005764	37	1196	219	17682	2.54562	79887;886;6714;10404;1636;5476;2697;1513;4668;7128;3122;128338;10437;8635;5641;1522;441027;84079;947;847;5547;824;3920;4125;10268;10203;1520;1508;4758;4322;54749;6556;1471;1200;7805;2548;7852	PLBD1;CCKAR;SRC;CPQ;ACE;CTSA;GJA1;CTSK;NAGA;TNFAIP3;HLA-DRA;DRAM2;IFI30;RNASET2;LGMN;CTSZ;TMEM150C;ANKRD27;CD34;CAT;PRCP;CAPN2;LAMP2;MAN2B1;RAMP3;CALCRL;CTSS;CTSB;NEU1;MMP13;EPDR1;SLC11A1;CST3;TPP1;LAPTM5;GAA;CXCR4	2.21e-06	5.65505	7.39e-05
GO:0005911	cell-cell junction	http://amigo.geneontology.org/amigo/term/GO:0005911	30	1196	159	17682	2.83553	5756;9459;2885;5097;1499;1003;100506658;1000;7454;3937;2195;120;963;4643;30011;5027;1894;1072;5796;55243;87;3611;284217;26872;23705;1305;998;7414;5058;4045	TWF1;ARHGEF6;GRB2;PCDH1;CTNNB1;CDH5;OCLN;CDH2;WAS;LCP2;FAT1;ADD3;CD53;MYO1E;SH3KBP1;P2RX7;ECT2;CFL1;PTPRK;KIRREL;ACTN1;ILK;LAMA1;STEAP1;CADM1;COL13A1;CDC42;VCL;PAK1;LSAMP	2.93e-06	5.53355	9.07e-05
GO:0030027	lamellipodium	http://amigo.geneontology.org/amigo/term/GO:0030027	29	1196	151	17682	2.88507	59;9459;5880;1499;5420;1000;54518;22902;2195;1803;323;199;89846;1020;2191;84687;57514;22885;4628;387;3688;55740;23022;4651;3611;23603;10788;5872;27	ACTA2;ARHGEF6;RAC2;CTNNB1;PODXL;CDH2;APBB1IP;RUFY3;FAT1;DPP4;APBB2;AIF1;FGD3;CDK5;FAP;PPP1R9B;ARHGAP31;ABLIM3;MYH10;RHOA;ITGB1;ENAH;PALLD;MYO10;ILK;CORO1C;IQGAP2;RAB13;ABL2	3.14e-06	5.50264	9.09e-05
GO:0043202	lysosomal lumen	http://amigo.geneontology.org/amigo/term/GO:0043202	19	1196	74	17682	3.8411	5476;2760;10437;5159;8635;5641;3339;6948;2799;427;375790;972;1462;950;2239;1520;4758;1200;2548	CTSA;GM2A;IFI30;PDGFRB;RNASET2;LGMN;HSPG2;TCN2;GNS;ASAH1;AGRN;CD74;VCAN;SCARB2;GPC4;CTSS;NEU1;TPP1;GAA	4.78e-06	5.32064	0.000125913
GO:0005576	extracellular region	http://amigo.geneontology.org/amigo/term/GO:0005576	144	1196	1441	17682	1.54275	4318;5728;2589;1291;1282;3455;2042;6678;22856;54209;6483;51705;3371;4828;5737;1306;6376;8038;7058;4313;4015;3426;1636;167681;1289;1513;9353;81578;713;11117;9509;717;6387;6352;79630;3575;1278;7059;9507;3486;1297;649;118429;7092;4745;10437;2256;1280;6039;4327;4052;3625;7123;1359;5176;1303;10911;5806;6347;84624;8635;389558;5054;11197;1284;4811;7132;25903;714;5341;3339;255631;7424;6948;51752;2252;284…	MMP9;PTEN;GALNT1;COL6A1;COL4A1;IFNAR2;EPHA3;SPARC;CHSY1;TREM2;ST3GAL2;EMCN;TNC;NMB;PTGFR;COL15A1;CX3CL1;ADAM12;THBS2;MMP2;LOX;CFI;ACE;PRSS35;COL5A1;CTSK;SLIT2;COL21A1;C1QB;EMILIN1;ADAMTS2;C2;CXCL12;CCL5;C1orf54;IL7R;COL1A2;THBS3;ADAMTS4;IGFBP3;COL9A1;BMP1;ANTXR2;TLL1;NELL1;IFI30;FGF11;COL2A1;RNASE6;MMP19;LTBP1;INHBB;CLEC3B;CPA3;SERPINF1;COL12A1;UTS2;PTX3;CCL2;FNDC1;RNASET2;FAM180A;SERPINE1;WIF1;C…	5.05e-06	5.29712	0.000125913
GO:0016020	membrane	http://amigo.geneontology.org/amigo/term/GO:0016020	180	1196	1894	17682	1.47681	55830;10154;10672;4637;2589;1291;118788;54842;51303;51696;3162;4627;22856;5764;1499;7046;64175;54331;550;3371;11259;953;9235;29109;1003;50515;9120;9114;3426;7272;951;6507;5476;11270;4170;4893;1798;84766;1794;9353;7107;3939;3838;7786;26031;55920;79065;3554;54477;8460;259230;9732;8611;10894;55379;1803;9037;120;323;23480;241;54843;4363;637;7171;6536;84669;8482;3685;5159;1020;1528;4684;10403;8655;188…	GLT8D1;PLXNC1;GNA13;MYL6;GALNT1;COL6A1;PIK3AP1;MFSD6;FKBP11;HECA;HMOX1;MYH9;CHSY1;PTN;CTNNB1;TGFBR1;P3H1;GNG2;AUP1;TNC;FILIP1L;ENTPD1;IL32;FHOD1;CDH5;CHST11;SLC16A6;ATP6V0D1;CFI;TTK;CD37;SLC1A3;CTSA;NRM;MCL1;NRAS;DPAGT1;CRACR2A;DOCK2;SLIT2;GPR137B;LDHA;KPNA2;MAP3K12;OSBPL3;RCC2;ATG9A;IL1R1;PLEKHA5;TPST1;SGMS1;DOCK4;PPAP2A;LYVE1;LRRC59;DPP4;SEMA5A;ADD3;APBB2;SEC61G;ALOX5AP;SYTL2;ABCC1;BID;TPM4;SLC…	5.22e-06	5.28215	0.000125913
GO:0045121	membrane raft	http://amigo.geneontology.org/amigo/term/GO:0045121	30	1196	181	17682	2.48775	5420;6281;1756;2697;355;1803;23180;2534;871;7070;23213;7132;948;284;79180;3688;1947;1820;3783;824;55243;2773;5912;3791;55824;302;5788;7414;2770;1901	PODXL;S100A10;DMD;GJA1;FAS;DPP4;RFTN1;FYN;SERPINH1;THY1;SULF1;TNFRSF1A;CD36;ANGPT1;EFHD2;ITGB1;EFNB1;ARID3A;KCNN4;CAPN2;KIRREL;GNAI3;RAP2B;KDR;PAG1;ANXA2;PTPRC;VCL;GNAI1;S1PR1	2.7e-05	4.56818	0.000617384
GO:0030175	filopodium	http://amigo.geneontology.org/amigo/term/GO:0030175	16	1196	63	17682	3.79209	59;5756;5420;1756;4430;22902;2195;1020;3936;84687;7430;3688;55740;10123;998;10788	ACTA2;TWF1;PODXL;DMD;MYO1B;RUFY3;FAT1;CDK5;LCP1;PPP1R9B;EZR;ITGB1;ENAH;ARL4C;CDC42;IQGAP2	2.96e-05	4.52858	0.000642507
GO:0005903	brush border	http://amigo.geneontology.org/amigo/term/GO:0005903	14	1196	50	17682	4.17679	4637;5339;4627;4311;4430;197021;120;4643;7430;4628;87;7170;1192;7414	MYL6;PLEC;MYH9;MME;MYO1B;LCTL;ADD3;MYO1E;EZR;MYH10;ACTN1;TPM3;CLIC1;VCL	3.75e-05	4.42618	0.000774625
GO:0005829	cytosol	http://amigo.geneontology.org/amigo/term/GO:0005829	261	1196	3051	17682	1.33863	59;1742;392;3337;81930;330;3091;9459;55233;10672;4637;7334;79887;5728;22948;7082;118788;526;1381;2876;867;114793;2885;409;5339;1063;5880;57103;80215;3162;83478;89853;1845;4627;55839;9639;886;1499;6714;775;161;10092;5594;58484;10051;1026;93663;4828;7345;91010;10395;100506658;64077;79822;9824;81624;1756;55303;4281;56952;4170;54442;114548;2697;7454;5321;1794;994;3937;185;800;5685;54518;285381;6790;3…	ACTA2;DLG4;ARHGAP1;DNAJB1;KIF18A;BIRC3;HIF1A;ARHGEF6;MOB1A;GNA13;MYL6;UBE2N;PLBD1;PTEN;CCT5;TJP1;PIK3AP1;ATP6V1B2;CRABP1;GPX1;CBL;FMNL2;GRB2;ARRB2;PLEC;CENPF;RAC2;TIGAR;RUNX1-IT1;HMOX1;ARHGAP24;MVB12B;DUSP3;MYH9;CENPN;ARHGEF10;CCKAR;CTNNB1;SRC;CACNA1C;AP2A2;ARPC5;MAPK1;NLRC4;SMC4;CDKN1A;ARHGAP18;NMB;UCHL1;FMNL3;DLC1;OCLN;LHPP;ARHGAP28;ARHGAP11A;DIAPH3;DMD;GIMAP4;MID1;PRTFDC1;MCL1;KCTD5;NLRP3;GJA1…	5.19e-05	4.28496	0.00102355
GO:0042470	melanosome	http://amigo.geneontology.org/amigo/term/GO:0042470	20	1196	99	17682	3.02051	10672;526;4323;10457;483;822;11021;54843;5874;5176;51393;8934;4629;3688;84079;1508;10981;302;1200;3690	GNA13;ATP6V1B2;MMP14;GPNMB;ATP1B3;CAPG;RAB35;SYTL2;RAB27B;SERPINF1;TRPV2;RAB29;MYH11;ITGB1;ANKRD27;CTSB;RAB32;ANXA2;TPP1;ITGB3	5.55e-05	4.25548	0.00104781
GO:0032587	ruffle membrane	http://amigo.geneontology.org/amigo/term/GO:0032587	17	1196	78	17682	3.25426	5756;6714;10395;199;3685;3936;2191;84687;7430;5341;3688;1072;7168;9847;4646;3690;5058	TWF1;SRC;DLC1;AIF1;ITGAV;LCP1;FAP;PPP1R9B;EZR;PLEK;ITGB1;CFL1;TPM1;C2CD5;MYO6;ITGB3;PAK1	8.83e-05	4.05393	0.00159715
GO:0030666	endocytic vesicle membrane	http://amigo.geneontology.org/amigo/term/GO:0030666	14	1196	56	17682	3.728	1742;23432;161;115677;3122;4481;3118;8685;23166;948;972;3127;817;9332	DLG4;GPR161;AP2A2;NOSTRIN;HLA-DRA;MSR1;HLA-DQA2;MARCO;STAB1;CD36;CD74;HLA-DRB5;CAMK2D;CD163	0.000106028	3.97458	0.00184065
GO:0005765	lysosomal membrane	http://amigo.geneontology.org/amigo/term/GO:0005765	35	1196	248	17682	2.11925	1291;526;58986;3109;9114;7107;1803;3122;128338;3118;1889;23531;23545;2776;55255;972;3127;124976;206358;53346;950;3920;4646;290;2773;10312;4758;523;968;302;3108;2770;7805;2548;28956	COL6A1;ATP6V1B2;TMEM8A;HLA-DMB;ATP6V0D1;GPR137B;DPP4;HLA-DRA;DRAM2;HLA-DQA2;ECE1;MMD;ATP6V0A2;GNAQ;WDR41;CD74;HLA-DRB5;SPNS2;SLC36A1;TM6SF1;SCARB2;LAMP2;MYO6;ANPEP;GNAI3;TCIRG1;NEU1;ATP6V1A;CD68;ANXA2;HLA-DMA;GNAI1;LAPTM5;GAA;LAMTOR2	0.000116142	3.93501	0.00193868
GO:0015629	actin cytoskeleton	http://amigo.geneontology.org/amigo/term/GO:0015629	31	1196	210	17682	2.21391	59;5756;4082;4627;10092;1756;7454;800;7456;9262;55917;3936;4643;7430;4628;54443;64151;23022;2316;79834;23603;30851;1612;25;26064;832;283431;10788;27;7414;1627	ACTA2;TWF1;MARCKS;MYH9;ARPC5;DMD;WAS;CALD1;WIPF1;STK17B;CTTNBP2NL;LCP1;MYO1E;EZR;MYH10;ANLN;NCAPG;PALLD;FLNA;PEAK1;CORO1C;TAX1BP3;DAPK1;ABL1;RAI14;CAPZB;GAS2L3;IQGAP2;ABL2;VCL;DBN1	0.000136778	3.86398	0.00219858
GO:0005581	collagen trimer	http://amigo.geneontology.org/amigo/term/GO:0005581	14	1196	58	17682	3.59904	129080;4015;81578;713;11117;114897;4481;8685;714;255631;712;114904;7373;1292	EMID1;LOX;COL21A1;C1QB;EMILIN1;C1QTNF1;MSR1;MARCO;C1QC;COL24A1;C1QA;C1QTNF6;COL14A1;COL6A2	0.000145632	3.83674	0.00225729
GO:0005884	actin filament	http://amigo.geneontology.org/amigo/term/GO:0005884	13	1196	52	17682	3.7257	5880;6714;8522;4430;7456;199;2534;3936;7430;23022;87;2316;832	RAC2;SRC;GAS7;MYO1B;WIPF1;AIF1;FYN;LCP1;EZR;PALLD;ACTN1;FLNA;CAPZB	0.00018539	3.73191	0.00268197
GO:0030670	phagocytic vesicle membrane	http://amigo.geneontology.org/amigo/term/GO:0030670	13	1196	52	17682	3.7257	5880;10890;51715;9114;1536;533;23545;51762;11031;3920;10981;10312;6556	RAC2;RAB10;RAB23;ATP6V0D1;CYBB;ATP6V0B;ATP6V0A2;RAB8B;RAB31;LAMP2;RAB32;TCIRG1;SLC11A1	0.00018539	3.73191	0.00268197
GO:0010008	endosome membrane	http://amigo.geneontology.org/amigo/term/GO:0010008	27	1196	184	17682	2.19644	55697;7099;10890;376267;51715;9114;4430;11021;118429;3118;911;30846;4689;533;84168;23545;23643;3656;64841;4360;387849;10312;4615;26872;968;30845;51311	VAC14;TLR4;RAB10;RAB15;RAB23;ATP6V0D1;MYO1B;RAB35;ANTXR2;HLA-DQA2;CD1C;EHD2;NCF4;ATP6V0B;ANTXR1;ATP6V0A2;LY96;IRAK2;GNPNAT1;MRC1;REP15;TCIRG1;MYD88;STEAP1;CD68;EHD3;TLR8	0.000390508	3.40837	0.00529626
GO:0005788	endoplasmic reticulum lumen	http://amigo.geneontology.org/amigo/term/GO:0005788	27	1196	184	17682	2.19644	1291;1282;64175;1306;10418;1289;81578;1278;1297;1280;1303;8635;871;1284;79070;255631;51752;1277;9403;1293;79709;81029;7373;1292;1305;56034;5329	COL6A1;COL4A1;P3H1;COL15A1;SPON1;COL5A1;COL21A1;COL1A2;COL9A1;COL2A1;COL12A1;RNASET2;SERPINH1;COL4A2;KDELC1;COL24A1;ERAP1;COL1A1;SEP15;COL6A3;COLGALT1;WNT5B;COL14A1;COL6A2;COL13A1;PDGFC;PLAUR	0.000390508	3.40837	0.00529626
GO:0042383	sarcolemma	http://amigo.geneontology.org/amigo/term/GO:0042383	16	1196	83	17682	2.87507	1291;5339;10060;1756;6444;6443;1837;3688;1293;6546;1508;3679;6641;1292;302;6547	COL6A1;PLEC;ABCC9;DMD;SGCD;SGCB;DTNA;ITGB1;COL6A3;SLC8A1;CTSB;ITGA7;SNTB1;COL6A2;ANXA2;SLC8A3	0.00047081	3.32715	0.00619187
GO:0072686	mitotic spindle	http://amigo.geneontology.org/amigo/term/GO:0072686	10	1196	36	17682	4.13294	5594;51203;6790;822;8655;27436;983;1894;29127;998	MAPK1;NUSAP1;AURKA;CAPG;DYNLL1;EML4;CDK1;ECT2;RACGAP1;CDC42	0.000502548	3.29882	0.00641488
GO:0031258	lamellipodium membrane	http://amigo.geneontology.org/amigo/term/GO:0031258	7	1196	18	17682	5.7774	1803;3685;2191;84168;1072;3690;10979	DPP4;ITGAV;FAP;ANTXR1;CFL1;ITGB3;FERMT2	0.000703793	3.15256	0.00861893
GO:0045177	apical part of cell	http://amigo.geneontology.org/amigo/term/GO:0045177	15	1196	78	17682	2.86654	7082;1499;29899;2191;5641;7430;22846;4646;4257;9456;728;998;79633;387755;5327	TJP1;CTNNB1;GPSM2;FAP;LGMN;EZR;VASH1;MYO6;MGST1;HOMER1;C5AR1;CDC42;FAT4;INSC;PLAT	0.000714935	3.14573	0.00861893
GO:0005856	cytoskeleton	http://amigo.geneontology.org/amigo/term/GO:0005856	42	1196	354	17682	1.78151	83478;9124;80206;5594;115677;1756;257019;122786;1794;800;54518;120;57584;89846;23406;7171;170954;6444;1020;4643;6443;84687;28951;54874;30011;8934;397;387;9758;7114;7168;55691;5216;6641;7170;166614;832;9168;5414;203068;7414;91624	ARHGAP24;PDLIM1;FHOD3;MAPK1;NOSTRIN;DMD;FRMD3;FRMD6;DOCK2;CALD1;APBB1IP;ADD3;ARHGAP21;FGD3;COTL1;TPM4;PPP1R18;SGCD;CDK5;MYO1E;SGCB;PPP1R9B;TRIB2;FNBP1L;SH3KBP1;RAB29;ARHGDIB;RHOA;FRMPD4;TMSB4X;TPM1;FRMD4A;PFN1;SNTB1;TPM3;DCLK2;CAPZB;TMSB10;SEPT4;TUBB;VCL;NEXN	0.000741693	3.12978	0.00869333
GO:0030496	midbody	http://amigo.geneontology.org/amigo/term/GO:0030496	20	1196	124	17682	2.40811	1063;6790;55920;10112;5911;4628;983;1894;387;153020;5898;2773;259266;5347;29127;998;382;5501;302;2770	CENPF;AURKA;RCC2;KIF20A;RAP2A;MYH10;CDK1;ECT2;RHOA;RASGEF1B;RALA;GNAI3;ASPM;PLK1;RACGAP1;CDC42;ARF6;PPP1CC;ANXA2;GNAI1	0.000761168	3.11852	0.00869333
GO:0005921	gap junction	http://amigo.geneontology.org/amigo/term/GO:0005921	6	1196	14	17682	6.36303	7082;2697;10052;2701;24145;1627	TJP1;GJA1;GJC1;GJA4;PANX1;DBN1	0.00114496	2.94121	0.0127414
GO:0005834	heterotrimeric G-protein complex	http://amigo.geneontology.org/amigo/term/GO:0005834	9	1196	35	17682	3.82291	10672;54331;2775;2791;2776;2788;2773;8786;2770	GNA13;GNG2;GNAO1;GNG11;GNAQ;GNG7;GNAI3;RGS11;GNAI1	0.00150684	2.82193	0.0163493
GO:0014704	intercalated disc	http://amigo.geneontology.org/amigo/term/GO:0014704	10	1196	43	17682	3.45876	7082;1000;2697;7533;10052;3759;3688;817;6546;5058	TJP1;CDH2;GJA1;YWHAH;GJC1;KCNJ2;ITGB1;CAMK2D;SLC8A1;PAK1	0.00160692	2.794	0.0170099
GO:0042613	MHC class II protein complex	http://amigo.geneontology.org/amigo/term/GO:0042613	6	1196	16	17682	5.56702	3109;3122;3118;972;3127;3108	HLA-DMB;HLA-DRA;HLA-DQA2;CD74;HLA-DRB5;HLA-DMA	0.00197628	2.70415	0.0203152
GO:0043197	dendritic spine	http://amigo.geneontology.org/amigo/term/GO:0043197	16	1196	97	17682	2.45815	1742;5728;409;79953;6507;55752;84687;4628;3759;3688;9758;6546;4131;5501;27;6547	DLG4;PTEN;ARRB2;SYNDIG1;SLC1A3;SEPT11;PPP1R9B;MYH10;KCNJ2;ITGB1;FRMPD4;SLC8A1;MAP1B;PPP1CC;ABL2;SLC8A3	0.0020128	2.6962	0.0203152
GO:0005916	fascia adherens	http://amigo.geneontology.org/amigo/term/GO:0005916	5	1196	11	17682	6.74414	1499;1000;2697;87;7414	CTNNB1;CDH2;GJA1;ACTN1;VCL	0.00245354	2.61021	0.0238354
GO:0071438	invadopodium membrane	http://amigo.geneontology.org/amigo/term/GO:0071438	4	1196	6	17682	9.88591	1803;2191;3688;5329	DPP4;FAP;ITGB1;PLAUR	0.00247141	2.60706	0.0238354
GO:0031527	filopodium membrane	http://amigo.geneontology.org/amigo/term/GO:0031527	6	1196	18	17682	4.9479	1756;3685;84168;4651;382;3690	DMD;ITGAV;ANTXR1;MYO10;ARF6;ITGB3	0.00319761	2.49518	0.0301687
GO:0032059	bleb	http://amigo.geneontology.org/amigo/term/GO:0032059	4	1196	7	17682	8.47315	29109;5027;7168;24145	FHOD1;P2RX7;TPM1;PANX1	0.00369006	2.43297	0.0340742
GO:0043235	receptor complex	http://amigo.geneontology.org/amigo/term/GO:0043235	18	1196	125	17682	2.14619	2022;7046;3824;5787;4916;8829;7132;658;3566;3688;4919;10268;5745;26996;3693;7421;57125;3690	ENG;TGFBR1;KLRD1;PTPRB;NTRK3;NRP1;TNFRSF1A;BMPR1B;IL4R;ITGB1;ROR1;RAMP3;PTH1R;GPR160;ITGB5;VDR;PLXDC1;ITGB3	0.00408466	2.38884	0.0369322
GO:0000307	cyclin-dependent protein kinase holoenzyme complex	http://amigo.geneontology.org/amigo/term/GO:0000307	4	1196	8	17682	7.41359	1026;1021;898;595	CDKN1A;CDK6;CCNE1;CCND1	0.00525984	2.27903	0.0455098
GO:0031092	platelet alpha granule membrane	http://amigo.geneontology.org/amigo/term/GO:0031092	4	1196	8	17682	7.41359	6678;5175;948;3690	SPARC;PECAM1;CD36;ITGB3	0.00525984	2.27903	0.0455098
GO:0005901	caveola	http://amigo.geneontology.org/amigo/term/GO:0005901	12	1196	70	17682	2.55	81930;3162;6714;1012;5594;10395;483;83483;30846;5740;1508;26509	KIF18A;HMOX1;SRC;CDH13;MAPK1;DLC1;ATP1B3;PLVAP;EHD2;PTGIS;CTSB;MYOF	0.00534792	2.27181	0.0455098
GO:0005622	intracellular	http://amigo.geneontology.org/amigo/term/GO:0005622	54	1196	544	17682	1.48967	9459;3455;3956;57103;54622;9201;7046;23114;58484;185;151556;5877;2205;126308;22859;54541;23327;55816;58533;131578;8644;7305;595;3965;79772;79668;3566;1436;972;9535;196527;6303;87;10268;1508;4086;55824;25939;113;25906;9289;51109;79633;55504;6236;55619;26578;57125;5788;81553;10769;6422;50640;60401	ARHGEF6;IFNAR2;LGALS1;TIGAR;ARL15;DCLK1;TGFBR1;NFASC;NLRC4;AGTR1;GPR155;RABIF;FCER1A;MOB3A;ADGRL1;DDIT4;NEDD4L;DOK5;SNX6;LRRC15;AKR1C3;TYROBP;CCND1;LGALS9;MCTP1;PARP8;IL4R;CSF1R;CD74;GMFG;ANO6;SAT1;ACTN1;RAMP3;CTSB;SMAD1;PAG1;SAMHD1;ADCY7;ANAPC15;ADGRG1;RDH11;FAT4;TNFRSF19;RRAD;DOCK10;OSTF1;PLXDC1;PTPRC;FAM49A;PLK2;SFRP1;PNPLA8;EDA2R	0.0054775	2.26142	0.0457161
GO:0043198	dendritic shaft	http://amigo.geneontology.org/amigo/term/GO:0043198	8	1196	36	17682	3.30079	79953;775;4133;55243;2316;6546;3611;9456	SYNDIG1;CACNA1C;MAP2;KIRREL;FLNA;SLC8A1;ILK;HOMER1	0.00582767	2.2345	0.0477209
GO:0032154	cleavage furrow	http://amigo.geneontology.org/amigo/term/GO:0032154	9	1196	45	17682	2.97169	4627;4628;1894;387;3688;5898;29127;382;5501	MYH9;MYH10;ECT2;RHOA;ITGB1;RALA;RACGAP1;ARF6;PPP1CC	0.00641335	2.19291	0.0515444
GO:0005768	endosome	http://amigo.geneontology.org/amigo/term/GO:0005768	26	1196	218	17682	1.78022	2885;886;7046;57561;10890;29887;1636;79065;51375;23180;2534;58533;7126;1889;7430;6948;401548;23621;2357;387;51762;10203;3791;382;302;1901	GRB2;CCKAR;TGFBR1;ARRDC3;RAB10;SNX10;ACE;ATG9A;SNX7;RFTN1;FYN;SNX6;TNFAIP1;ECE1;EZR;TCN2;SNX30;BACE1;FPR1;RHOA;RAB8B;CALCRL;KDR;ARF6;ANXA2;S1PR1	0.00657201	2.1823	0.0515862
GO:0030139	endocytic vesicle	http://amigo.geneontology.org/amigo/term/GO:0030139	10	1196	54	17682	2.75248	409;100506658;1803;6347;5287;5898;4646;382;5872;30845	ARRB2;OCLN;DPP4;CCL2;PIK3C2B;RALA;MYO6;ARF6;RAB13;EHD3	0.00665629	2.17677	0.0515862
GO:0031941	filamentous actin	http://amigo.geneontology.org/amigo/term/GO:0031941	6	1196	22	17682	4.04736	7171;7168;4646;10788;10979;5058	TPM4;TPM1;MYO6;IQGAP2;FERMT2;PAK1	0.00720719	2.14223	0.0548758
GO:0005783	endoplasmic reticulum	http://amigo.geneontology.org/amigo/term/GO:0005783	71	1196	772	17682	1.38239	1742;5205;55697;10745;129080;3162;54757;401494;886;5764;64175;54947;10404;29887;5476;259230;10613;55379;2135;55625;241;3460;338773;56999;58485;871;7070;23213;1586;5287;1522;4232;57552;51752;22846;23621;219970;4939;2353;11328;3776;5740;206358;847;256691;493856;341;824;23585;4257;10203;4121;51304;169200;2055;2131;4938;23645;3791;201562;253832;1622;581;1382;90993;1471;80346;9538;24145;8406;623	DLG4;ATP8B1;VAC14;PHTF1;EMID1;HMOX1;FAM20A;HACD4;CCKAR;PTN;P3H1;LPCAT2;CPQ;SNX10;CTSA;SGMS1;ERLIN1;LRRC59;EXTL2;ZDHHC7;ALOX5AP;IFNGR2;TMEM119;ADAMTS9;TRAPPC1;SERPINH1;THY1;SULF1;CYP17A1;PIK3C2B;CTSZ;MEST;NCEH1;ERAP1;VASH1;BACE1;GLYATL2;OAS2;FOS;FKBP9;KCNK2;PTGIS;SLC36A1;CAT;MAMDC2;CISD2;APOC1;CAPN2;TMEM50A;MGST1;CALCRL;MAN1A1;ZDHHC3;TMEM64;CLN8;EXT1;OAS1;PPP1R15A;KDR;HACD2;ZDHHC20;DBI;BAX;CRABP2;…	0.00849122	2.07103	0.0635377
GO:0048471	perinuclear region of cytoplasm	http://amigo.geneontology.org/amigo/term/GO:0048471	57	1196	596	17682	1.43465	5756;7099;2589;1063;3162;5764;1499;6714;6275;1012;10890;1026;376267;6376;1033;25780;6790;4430;123879;2195;199;50507;7059;83483;4745;4000;3625;5176;30846;6347;57572;54922;1889;7430;8934;23413;3301;1435;3688;4939;51762;5730;817;947;55243;2316;10673;4646;387849;1508;25;302;1471;3912;1192;50640;30845	TWF1;TLR4;GALNT1;CENPF;HMOX1;PTN;CTNNB1;SRC;S100A4;CDH13;RAB10;CDKN1A;RAB15;CX3CL1;CDKN3;RASGRP3;AURKA;MYO1B;DCUN1D3;FAT1;AIF1;NOX4;THBS3;PLVAP;NELL1;LMNA;INHBB;SERPINF1;EHD2;CCL2;DOCK6;RASIP1;ECE1;EZR;RAB29;NCS1;DNAJA1;CSF1;ITGB1;OAS2;RAB8B;PTGDS;CAMK2D;CD34;KIRREL;FLNA;TNFSF13B;MYO6;REP15;CTSB;ABL1;ANXA2;CST3;LAMB1;CLIC1;PNPLA8;EHD3	0.00873602	2.05869	0.0642616
GO:0005938	cell cortex	http://amigo.geneontology.org/amigo/term/GO:0005938	16	1196	116	17682	2.0533	4082;1499;29899;120;54874;4628;387;9847;4651;4646;5216;26064;382;302;10979;1627	MARCKS;CTNNB1;GPSM2;ADD3;FNBP1L;MYH10;RHOA;C2CD5;MYO10;MYO6;PFN1;RAI14;ARF6;ANXA2;FERMT2;DBN1	0.00933807	2.02974	0.0675454
GO:0008305	integrin complex	http://amigo.geneontology.org/amigo/term/GO:0008305	6	1196	24	17682	3.70966	3684;4627;3685;3688;22801;3690	ITGAM;MYH9;ITGAV;ITGB1;ITGA11;ITGB3	0.0101982	1.99148	0.0725578
GO:0005605	basal lamina	http://amigo.geneontology.org/amigo/term/GO:0005605	5	1196	17	17682	4.36237	953;4811;3339;375790;3910	ENTPD1;NID1;HSPG2;AGRN;LAMA4	0.0107769	1.96751	0.0742409
GO:0031528	microvillus membrane	http://amigo.geneontology.org/amigo/term/GO:0031528	5	1196	17	17682	4.36237	1499;5420;3685;7430;3690	CTNNB1;PODXL;ITGAV;EZR;ITGB3	0.0107769	1.96751	0.0742409
GO:0016528	sarcoplasm	http://amigo.geneontology.org/amigo/term/GO:0016528	3	1196	5	17682	8.89036	5339;6695;2170	PLEC;SPOCK1;FABP3	0.0111623	1.95225	0.075694
GO:0055038	recycling endosome membrane	http://amigo.geneontology.org/amigo/term/GO:0055038	8	1196	42	17682	2.82828	10890;55041;30846;5911;5912;382;5872;30845	RAB10;PLEKHB2;EHD2;RAP2A;RAP2B;ARF6;RAB13;EHD3	0.0126412	1.89821	0.0836456
GO:0031594	neuromuscular junction	http://amigo.geneontology.org/amigo/term/GO:0031594	9	1196	51	17682	2.62119	6695;4627;1020;5027;4628;3688;4038;817;3679	SPOCK1;MYH9;CDK5;P2RX7;MYH10;ITGB1;LRP4;CAMK2D;ITGA7	0.0127203	1.8955	0.0836456
GO:0005874	microtubule	http://amigo.geneontology.org/amigo/term/GO:0005874	30	1196	279	17682	1.60488	22948;4133;6993;4281;55920;4130;10112;283349;51673;8655;27436;10783;10808;6546;55083;4131;7846;84790;29127;80346;283431;1759;10788;10018;203068;6547;7280;9638;22974;89796	CCT5;MAP2;DYNLT1;MID1;RCC2;MAP1A;KIF20A;RASSF3;TPPP3;DYNLL1;EML4;NEK6;HSPH1;SLC8A1;KIF26B;MAP1B;TUBA1A;TUBA1C;RACGAP1;REEP4;GAS2L3;DNM1;IQGAP2;BCL2L11;TUBB;SLC8A3;TUBB2A;FEZ1;TPX2;NAV1	0.0133136	1.87571	0.0862402
GO:0031234	extrinsic component of cytoplasmic side of plasma membrane	http://amigo.geneontology.org/amigo/term/GO:0031234	10	1196	61	17682	2.43566	1742;6714;2534;7881;1837;25;9265;29127;27;10979	DLG4;SRC;FYN;KCNAB1;DTNA;ABL1;CYTH3;RACGAP1;ABL2;FERMT2	0.0136379	1.86525	0.0870422
GO:0005789	endoplasmic reticulum membrane	http://amigo.geneontology.org/amigo/term/GO:0005789	69	1196	774	17682	1.33745	51303;57190;388650;3162;401494;54947;550;10890;7345;9420;5351;1798;2697;5321;23508;6916;79065;10613;1545;197021;55379;2135;50507;11021;23480;241;118429;6446;79868;80270;10052;55711;1528;65009;1586;4232;256987;51752;387;5730;11328;3776;5740;9517;493856;6252;55331;4257;9023;2055;2131;391;23645;201562;9415;58477;581;253782;90993;998;51109;80346;5329;9538;24145;2180;50640;439;51311	FKBP11;SEPN1;FAM69A;HMOX1;HACD4;LPCAT2;AUP1;RAB10;UCHL1;CYP7B1;PLOD1;DPAGT1;GJA1;PLA2G4A;TTC9;TBXAS1;ATG9A;ERLIN1;CYP1B1;LCTL;LRRC59;EXTL2;NOX4;RAB35;SEC61G;ALOX5AP;ANTXR2;SGK1;ALG13;HSD3B7;GJC1;FAR2;CYB5A;NDRG4;CYP17A1;MEST;SERINC5;ERAP1;RHOA;PTGDS;FKBP9;KCNK2;PTGIS;SPTLC2;CISD2;RTN1;ACER3;MGST1;CH25H;CLN8;EXT1;RHOG;PPP1R15A;HACD2;FADS2;SRPRB;BAX;CERS6;CREB3L1;CDC42;RDH11;REEP4;PLAUR;EI24;PANX1;…	0.0170195	1.76905	0.10705
GO:0005913	cell-cell adherens junction	http://amigo.geneontology.org/amigo/term/GO:0005913	8	1196	45	17682	2.63928	7082;4627;1499;1000;7791;23705;7414;4345	TJP1;MYH9;CTNNB1;CDH2;ZYX;CADM1;VCL;CD200	0.0176745	1.75265	0.109582
GO:0043034	costamere	http://amigo.geneontology.org/amigo/term/GO:0043034	5	1196	20	17682	3.70739	5339;1756;3611;9456;7414	PLEC;DMD;ILK;HOMER1;VCL	0.0185842	1.73086	0.113307
GO:0030659	cytoplasmic vesicle membrane	http://amigo.geneontology.org/amigo/term/GO:0030659	15	1196	116	17682	1.92334	10890;51375;7533;57584;22822;30011;23621;84079;4645;5898;57089;9847;26509;5872;79856	RAB10;SNX7;YWHAH;ARHGAP21;PHLDA1;SH3KBP1;BACE1;ANKRD27;MYO5B;RALA;ENTPD7;C2CD5;MYOF;RAB13;SNX22	0.0187974	1.7259	0.113307
GO:0097481	neuronal postsynaptic density	http://amigo.geneontology.org/amigo/term/GO:0097481	10	1196	65	17682	2.28525	1742;9201;4133;4130;120;10486;4131;9456;6711;5058	DLG4;DCLK1;MAP2;MAP1A;ADD3;CAP2;MAP1B;HOMER1;SPTBN1;PAK1	0.0195316	1.70926	0.113955
GO:0045335	phagocytic vesicle	http://amigo.geneontology.org/amigo/term/GO:0045335	7	1196	37	17682	2.80761	51715;3685;948;51762;11031;10981;3693	RAB23;ITGAV;CD36;RAB8B;RAB31;RAB32;ITGB5	0.0196927	1.7057	0.113955
GO:0030017	sarcomere	http://amigo.geneontology.org/amigo/term/GO:0030017	7	1196	37	17682	2.80761	10060;4313;5687;115557;7168;3611;832	ABCC9;MMP2;PSMA6;ARHGEF25;TPM1;ILK;CAPZB	0.0196927	1.7057	0.113955
GO:0030424	axon	http://amigo.geneontology.org/amigo/term/GO:0030424	23	1196	207	17682	1.6553	4311;5594;7345;7786;4685;3554;22902;22859;55752;1020;8829;1586;23413;4628;1837;23621;5796;4646;9456;57556;1471;5058;9638	MME;MAPK1;UCHL1;MAP3K12;NCAM2;IL1R1;RUFY3;ADGRL1;SEPT11;CDK5;NRP1;CYP17A1;NCS1;MYH10;DTNA;BACE1;PTPRK;MYO6;HOMER1;SEMA6A;CST3;PAK1;FEZ1	0.0203372	1.69171	0.114202
GO:0016600	flotillin complex	http://amigo.geneontology.org/amigo/term/GO:0016600	3	1196	7	17682	6.34954	867;4038;23603	CBL;LRP4;CORO1C	0.0217451	1.66264	0.114202
GO:0097197	tetraspanin-enriched microdomain	http://amigo.geneontology.org/amigo/term/GO:0097197	3	1196	7	17682	6.34954	81619;10867;23555	TSPAN14;TSPAN9;TSPAN15	0.0217451	1.66264	0.114202
GO:0046581	intercellular canaliculus	http://amigo.geneontology.org/amigo/term/GO:0046581	3	1196	7	17682	6.34954	7082;1803;4322	TJP1;DPP4;MMP13	0.0217451	1.66264	0.114202
GO:0016460	myosin II complex	http://amigo.geneontology.org/amigo/term/GO:0016460	3	1196	7	17682	6.34954	4627;4628;10627	MYH9;MYH10;MYL12A	0.0217451	1.66264	0.114202
GO:0043203	axon hillock	http://amigo.geneontology.org/amigo/term/GO:0043203	3	1196	7	17682	6.34954	6790;5176;22974	AURKA;SERPINF1;TPX2	0.0217451	1.66264	0.114202
GO:0002116	semaphorin receptor complex	http://amigo.geneontology.org/amigo/term/GO:0002116	3	1196	7	17682	6.34954	8829;8828;5362	NRP1;NRP2;PLXNA2	0.0217451	1.66264	0.114202
GO:0005771	multivesicular body	http://amigo.geneontology.org/amigo/term/GO:0005771	5	1196	21	17682	3.53065	2697;23621;972;1471;3108	GJA1;BACE1;CD74;CST3;HLA-DMA	0.0218405	1.66074	0.114202
GO:0031093	platelet alpha granule lumen	http://amigo.geneontology.org/amigo/term/GO:0031093	8	1196	48	17682	2.47391	6678;5054;7424;7114;87;3479;5552;7423	SPARC;SERPINE1;VEGFC;TMSB4X;ACTN1;IGF1;SRGN;VEGFB	0.0240042	1.61971	0.124022
GO:0005912	adherens junction	http://amigo.geneontology.org/amigo/term/GO:0005912	7	1196	39	17682	2.66332	90952;1499;1003;4643;84687;5796;7414	ESAM;CTNNB1;CDH5;MYO1E;PPP1R9B;PTPRK;VCL	0.0246721	1.60779	0.124722
GO:0005737	cytoplasm	http://amigo.geneontology.org/amigo/term/GO:0005737	358	1196	4820	17682	1.13999	55160;59;1742;392;81930;330;3091;2022;5756;80818;7334;7099;5728;22948;7082;1476;2876;51303;10745;867;2885;409;3956;5339;1063;57103;4323;6695;90102;6678;1845;91107;4627;641700;157313;9124;1499;5420;6714;10659;775;22797;1012;4311;51514;10092;5594;58484;51176;10051;1396;11259;23462;10404;1618;376267;10736;51715;29109;7345;5737;9627;91010;4133;10395;4616;30811;55107;9943;196;64077;26472;23207;1000;23…	ARHGEF10L;ACTA2;DLG4;ARHGAP1;KIF18A;BIRC3;HIF1A;ENG;TWF1;ZNF436;UBE2N;TLR4;PTEN;CCT5;TJP1;CSTB;GPX1;FKBP11;PHTF1;CBL;GRB2;ARRB2;LGALS1;PLEC;CENPF;TIGAR;MMP14;SPOCK1;PHLDB2;SPARC;DUSP3;TRIM47;MYH9;ECSCR;CDCA2;PDLIM1;CTNNB1;PODXL;SRC;CELF2;CACNA1C;TFEC;CDH13;MME;DTL;ARPC5;MAPK1;NLRC4;LEF1;SMC4;CRIP1;FILIP1L;HEY1;CPQ;DAZL;RAB15;SIX2;RAB23;FHOD1;UCHL1;PTGFR;SNCAIP;FMNL3;MAP2;DLC1;GADD45B;HUNK;ANO1;OX…	0.0249814	1.60238	0.124722
GO:0043209	myelin sheath	http://amigo.geneontology.org/amigo/term/GO:0043209	17	1196	143	17682	1.7685	22948;526;7384;23114;7345;2775;7070;7430;256987;5898;7846;523;998;382;5414;1759;30845	CCT5;ATP6V1B2;UQCRC1;NFASC;UCHL1;GNAO1;THY1;EZR;SERINC5;RALA;TUBA1A;ATP6V1A;CDC42;ARF6;SEPT4;DNM1;EHD3	0.0252388	1.59793	0.124722
GO:0005923	bicellular tight junction	http://amigo.geneontology.org/amigo/term/GO:0005923	14	1196	110	17682	1.89208	90952;7082;1499;7046;1003;100506658;58494;595;1894;55691;5912;9076;57125;5872	ESAM;TJP1;CTNNB1;TGFBR1;CDH5;OCLN;JAM2;CCND1;ECT2;FRMD4A;RAP2B;CLDN1;PLXDC1;RAB13	0.0252892	1.59706	0.124722
GO:0031982	vesicle	http://amigo.geneontology.org/amigo/term/GO:0031982	13	1196	100	17682	1.93209	4637;89853;8407;221;1889;7430;387;1072;124976;23603;84790;302;1192	MYL6;MVB12B;TAGLN2;ALDH3B1;ECE1;EZR;RHOA;CFL1;SPNS2;CORO1C;TUBA1C;ANXA2;CLIC1	0.0265242	1.57636	0.129343
GO:0016459	myosin complex	http://amigo.geneontology.org/amigo/term/GO:0016459	6	1196	31	17682	2.87086	4637;4430;4643;4628;4645;4651	MYL6;MYO1B;MYO1E;MYH10;MYO5B;MYO10	0.0274521	1.56142	0.131907
GO:0031902	late endosome membrane	http://amigo.geneontology.org/amigo/term/GO:0031902	12	1196	90	17682	1.98108	55697;89853;3109;79065;3122;285195;23531;3127;3920;6556;302;3108	VAC14;MVB12B;HLA-DMB;ATG9A;HLA-DRA;SLC9A9;MMD;HLA-DRB5;LAMP2;SLC11A1;ANXA2;HLA-DMA	0.0276579	1.55818	0.131907
GO:0031253	cell projection membrane	http://amigo.geneontology.org/amigo/term/GO:0031253	3	1196	8	17682	5.55553	11021;65009;55243	RAB35;NDRG4;KIRREL	0.0285157	1.54492	0.133073
GO:0045334	clathrin-coated endocytic vesicle	http://amigo.geneontology.org/amigo/term/GO:0045334	3	1196	8	17682	5.55553	11021;4643;4646	RAB35;MYO1E;MYO6	0.0285157	1.54492	0.133073
GO:0001772	immunological synapse	http://amigo.geneontology.org/amigo/term/GO:0001772	6	1196	32	17682	2.78099	1845;4627;951;963;940;7430	DUSP3;MYH9;CD37;CD53;CD28;EZR	0.0309114	1.50988	0.142719
GO:0016021	integral component of membrane	http://amigo.geneontology.org/amigo/term/GO:0016021	277	1196	3685	17682	1.14488	55830;11326;4064;90952;10154;10678;2212;753;11309;2589;2359;728215;526;54842;64231;391059;51303;25829;10184;388650;727936;22856;641700;401494;387509;54209;10159;5175;51705;23114;775;54947;3109;550;51330;57583;4311;57575;9697;23596;1306;219699;1003;2537;100506658;81855;6376;50515;8038;441631;10457;154467;221395;1240;1000;257019;951;1636;6507;57406;11270;4170;6398;1798;57419;185;84689;116159;151556…	GLT8D1;VSIG4;CD180;ESAM;PLXNC1;B3GNT2;FCGR2A;LDLRAD4;SLCO2B1;GALNT1;FPR3;FAM155A;ATP6V1B2;MFSD6;MS4A6A;FRRS1;FKBP11;TMEM184B;LHFPL2;FAM69A;GXYLT2;CHSY1;ECSCR;HACD4;GPR153;TREM2;ATP6AP2;PECAM1;EMCN;NFASC;CACNA1C;LPCAT2;HLA-DMB;AUP1;TNFRSF12A;TMEM181;MME;PCDH10;TRAM2;OPN3;COL15A1;UNC5B;CDH5;IFI6;OCLN;SFXN3;CX3CL1;CHST11;ADAM12;TSPAN11;GPNMB;CCDC167;ADGRF5;CMKLR1;CDH2;FRMD3;CD37;ACE;SLC1A3;ABHD6;NRM…	0.0317537	1.49821	0.145064
GO:0016010	dystrophin-associated glycoprotein complex	http://amigo.geneontology.org/amigo/term/GO:0016010	4	1196	16	17682	3.70512	1756;6444;6443;6641	DMD;SGCD;SGCB;SNTB1	0.0343913	1.46355	0.153627
GO:0030864	cortical actin cytoskeleton	http://amigo.geneontology.org/amigo/term/GO:0030864	6	1196	33	17682	2.69656	10395;1000;1072;824;10487;3927	DLC1;CDH2;CFL1;CAPN2;CAP1;LASP1	0.0346432	1.46038	0.153627
GO:0042995	cell projection	http://amigo.geneontology.org/amigo/term/GO:0042995	9	1196	62	17682	2.1548	5728;83478;10092;6376;285590;9644;7430;87;285	PTEN;ARHGAP24;ARPC5;CX3CL1;SH3PXD2B;SH3PXD2A;EZR;ACTN1;ANGPT2	0.0346899	1.4598	0.153627
GO:0045120	pronucleus	http://amigo.geneontology.org/amigo/term/GO:0045120	3	1196	9	17682	4.93797	1063;6790;2146	CENPF;AURKA;EZH2	0.0362676	1.44048	0.158992
GO:0044297	cell body	http://amigo.geneontology.org/amigo/term/GO:0044297	8	1196	53	17682	2.23988	59;22948;79953;5420;10159;51393;7430;203068	ACTA2;CCT5;SYNDIG1;PODXL;ATP6AP2;TRPV2;EZR;TUBB	0.0378129	1.42236	0.164108
GO:0043025	neuronal cell body	http://amigo.geneontology.org/amigo/term/GO:0043025	29	1196	297	17682	1.45461	775;7345;9627;4133;6507;1020;1586;5027;4628;658;3759;57282;4038;3776;817;3783;5796;2316;4651;4646;3611;9456;55450;998;1471;57125;6547;4045;51022	CACNA1C;UCHL1;SNCAIP;MAP2;SLC1A3;CDK5;CYP17A1;P2RX7;MYH10;BMPR1B;KCNJ2;SLC4A10;LRP4;KCNK2;CAMK2D;KCNN4;PTPRK;FLNA;MYO10;MYO6;ILK;HOMER1;CAMK2N1;CDC42;CST3;PLXDC1;SLC8A3;LSAMP;GLRX2	0.0409718	1.38751	0.176057
GO:0005741	mitochondrial outer membrane	http://amigo.geneontology.org/amigo/term/GO:0005741	15	1196	130	17682	1.71484	57103;4170;2697;637;3429;1528;8564;493856;4257;23446;23645;581;10018;2180;23788	TIGAR;MCL1;GJA1;BID;IFI27;CYB5A;KMO;CISD2;MGST1;SLC44A1;PPP1R15A;BAX;BCL2L11;ACSL1;MTCH2	0.0416624	1.38026	0.17727
GO:0030018	Z disc	http://amigo.geneontology.org/amigo/term/GO:0030018	13	1196	108	17682	1.78816	114907;1499;80206;775;1756;10627;23022;87;6546;9456;91624;5058;10398	FBXO32;CTNNB1;FHOD3;CACNA1C;DMD;MYL12A;PALLD;ACTN1;SLC8A1;HOMER1;NEXN;PAK1;MYL9	0.0428955	1.36759	0.180744
GO:0005876	spindle microtubule	http://amigo.geneontology.org/amigo/term/GO:0005876	7	1196	45	17682	2.30743	330;58484;51203;6790;4671;983;5347	BIRC3;NLRC4;NUSAP1;AURKA;NAIP;CDK1;PLK1	0.0445867	1.35079	0.184171
GO:0043020	NADPH oxidase complex	http://amigo.geneontology.org/amigo/term/GO:0043020	3	1196	10	17682	4.44392	50507;1536;4689	NOX4;CYBB;NCF4	0.0449818	1.34696	0.184171
GO:0043296	apical junction complex	http://amigo.geneontology.org/amigo/term/GO:0043296	3	1196	10	17682	4.44392	7082;122786;387	TJP1;FRMD6;RHOA	0.0449818	1.34696	0.184171
GO:0005770	late endosome	http://amigo.geneontology.org/amigo/term/GO:0005770	13	1196	110	17682	1.75544	89853;6714;5594;79065;5641;23621;84079;153020;64841;3920;6556;28956;7852	MVB12B;SRC;MAPK1;ATG9A;LGMN;BACE1;ANKRD27;RASGEF1B;GNPNAT1;LAMP2;SLC11A1;LAMTOR2;CXCR4	0.0479009	1.31966	0.19429
GO:0016324	apical plasma membrane	http://amigo.geneontology.org/amigo/term/GO:0016324	26	1196	267	17682	1.44944	5205;5728;7082;5420;100506658;55107;1000;9114;1803;50507;5874;5159;7070;7430;6518;8140;3776;56650;947;3783;5745;1508;10312;9076;523;8972	ATP8B1;PTEN;TJP1;PODXL;OCLN;ANO1;CDH2;ATP6V0D1;DPP4;NOX4;RAB27B;PDGFRB;THY1;EZR;SLC2A5;SLC7A5;KCNK2;CLDND1;CD34;KCNN4;PTH1R;CTSB;TCIRG1;CLDN1;ATP6V1A;MGAM	0.0520076	1.28393	0.208993
GO:0051233	spindle midzone	http://amigo.geneontology.org/amigo/term/GO:0051233	4	1196	19	17682	3.11957	6790;5347;29127;998	AURKA;PLK1;RACGAP1;CDC42	0.0541501	1.2664	0.209814
GO:0001931	uropod	http://amigo.geneontology.org/amigo/term/GO:0001931	3	1196	11	17682	4.0397	4627;7430;6404	MYH9;EZR;SELPLG	0.054629	1.26258	0.209814
GO:0044306	neuron projection terminus	http://amigo.geneontology.org/amigo/term/GO:0044306	3	1196	11	17682	4.0397	1742;4311;1756	DLG4;MME;DMD	0.054629	1.26258	0.209814
GO:0016471	vacuolar proton-transporting V-type ATPase complex	http://amigo.geneontology.org/amigo/term/GO:0016471	3	1196	11	17682	4.0397	9114;23545;10312	ATP6V0D1;ATP6V0A2;TCIRG1	0.054629	1.26258	0.209814
GO:0097038	perinuclear endoplasmic reticulum	http://amigo.geneontology.org/amigo/term/GO:0097038	3	1196	11	17682	4.0397	26031;824;1622	OSBPL3;CAPN2;DBI	0.054629	1.26258	0.209814
GO:0031965	nuclear membrane	http://amigo.geneontology.org/amigo/term/GO:0031965	21	1196	208	17682	1.50145	51514;10736;6474;26031;123920;28959;241;23406;4000;1894;2776;5730;4646;26509;25;8555;253782;1471;9538;1192;5058	DTL;SIX2;SHOX2;OSBPL3;CMTM3;TMEM176B;ALOX5AP;COTL1;LMNA;ECT2;GNAQ;PTGDS;MYO6;MYOF;ABL1;CDC14B;CERS6;CST3;EI24;CLIC1;PAK1	0.0567194	1.24627	0.215932
GO:0016323	basolateral plasma membrane	http://amigo.geneontology.org/amigo/term/GO:0016323	19	1196	185	17682	1.52675	1742;7082;409;1499;1000;6507;9056;4363;65009;960;4671;7430;57282;3783;6546;5745;728;23705;302	DLG4;TJP1;ARRB2;CTNNB1;CDH2;SLC1A3;SLC7A7;ABCC1;NDRG4;CD44;NAIP;EZR;SLC4A10;KCNN4;SLC8A1;PTH1R;C5AR1;CADM1;ANXA2	0.0595201	1.22534	0.224623
GO:0030141	secretory granule	http://amigo.geneontology.org/amigo/term/GO:0030141	9	1196	70	17682	1.90767	29923;5874;1359;5125;1277;3553;5552;998;5327	HILPDA;RAB27B;CPA3;PCSK5;COL1A1;IL1B;SRGN;CDC42;PLAT	0.0616331	1.21019	0.230593
GO:0042641	actomyosin	http://amigo.geneontology.org/amigo/term/GO:0042641	3	1196	12	17682	3.70285	4627;4628;1627	MYH9;MYH10;DBN1	0.0651723	1.18594	0.2358
GO:0071944	cell periphery	http://amigo.geneontology.org/amigo/term/GO:0071944	5	1196	30	17682	2.47019	1499;4430;53354;4811;7430	CTNNB1;MYO1B;PANK1;NID1;EZR	0.0677641	1.169	0.2358
GO:1990246	uniplex complex	http://amigo.geneontology.org/amigo/term/GO:1990246	2	1196	5	17682	5.92194	55013;90550	CCDC109B;MCU	0.0680652	1.16707	0.2358
GO:0097449	astrocyte projection	http://amigo.geneontology.org/amigo/term/GO:0097449	2	1196	5	17682	5.92194	7430;3776	EZR;KCNK2	0.0680652	1.16707	0.2358
GO:0072557	IPAF inflammasome complex	http://amigo.geneontology.org/amigo/term/GO:0072557	2	1196	5	17682	5.92194	58484;834	NLRC4;CASP1	0.0680652	1.16707	0.2358
GO:0097422	tubular endosome	http://amigo.geneontology.org/amigo/term/GO:0097422	2	1196	5	17682	5.92194	58533;84079	SNX6;ANKRD27	0.0680652	1.16707	0.2358
GO:0005638	lamin filament	http://amigo.geneontology.org/amigo/term/GO:0005638	2	1196	5	17682	5.92194	4000;84823	LMNA;LMNB2	0.0680652	1.16707	0.2358
GO:0000796	condensin complex	http://amigo.geneontology.org/amigo/term/GO:0000796	2	1196	5	17682	5.92194	10051;64151	SMC4;NCAPG	0.0680652	1.16707	0.2358
GO:0030315	T-tubule	http://amigo.geneontology.org/amigo/term/GO:0030315	6	1196	40	17682	2.22378	3762;775;7430;3759;817;6546	KCNJ5;CACNA1C;EZR;KCNJ2;CAMK2D;SLC8A1	0.0687745	1.16257	0.2358
GO:0031226	intrinsic component of plasma membrane	http://amigo.geneontology.org/amigo/term/GO:0031226	4	1196	21	17682	2.82215	7099;5159;23643;1901	TLR4;PDGFRB;LY96;S1PR1	0.0700879	1.15436	0.2358
GO:0042629	mast cell granule	http://amigo.geneontology.org/amigo/term/GO:0042629	4	1196	21	17682	2.82215	8013;5552;284021;5294	NR4A3;SRGN;MILR1;PIK3CG	0.0700879	1.15436	0.2358
GO:0002102	podosome	http://amigo.geneontology.org/amigo/term/GO:0002102	4	1196	21	17682	2.82215	285590;9644;7171;3936	SH3PXD2B;SH3PXD2A;TPM4;LCP1	0.0700879	1.15436	0.2358
GO:0030863	cortical cytoskeleton	http://amigo.geneontology.org/amigo/term/GO:0030863	4	1196	21	17682	2.82215	1742;7171;7430;2316	DLG4;TPM4;EZR;FLNA	0.0700879	1.15436	0.2358
GO:0005875	microtubule associated complex	http://amigo.geneontology.org/amigo/term/GO:0005875	5	1196	31	17682	2.39037	4133;4281;4130;8682;4131	MAP2;MID1;MAP1A;PEA15;MAP1B	0.0747811	1.12621	0.247748
GO:0030016	myofibril	http://amigo.geneontology.org/amigo/term/GO:0030016	5	1196	31	17682	2.39037	5756;800;9997;5687;115557	TWF1;CALD1;SCO2;PSMA6;ARHGEF25	0.0747811	1.12621	0.247748
GO:0030126	COPI vesicle coat	http://amigo.geneontology.org/amigo/term/GO:0030126	3	1196	13	17682	3.41782	205428;9276;51226	C3orf58;COPB2;COPZ2	0.0765682	1.11595	0.251747
GO:0055037	recycling endosome	http://amigo.geneontology.org/amigo/term/GO:0055037	11	1196	97	17682	1.68285	23432;10890;79065;53354;285195;5911;3688;4645;387849;7846;5872	GPR161;RAB10;ATG9A;PANK1;SLC9A9;RAP2A;ITGB1;MYO5B;REP15;TUBA1A;RAB13	0.0802772	1.09541	0.261957
GO:0043234	protein complex	http://amigo.geneontology.org/amigo/term/GO:0043234	31	1196	347	17682	1.32932	59;7334;1291;4627;1499;5594;10220;1756;26010;3554;10613;83605;9369;23180;4052;1837;4645;493856;5104;3611;4086;6641;4609;8786;1292;7153;5501;24145;7414;9770;5058	ACTA2;UBE2N;COL6A1;MYH9;CTNNB1;MAPK1;GDF11;DMD;SPATS2L;IL1R1;ERLIN1;CCM2;NRXN3;RFTN1;LTBP1;DTNA;MYO5B;CISD2;SERPINA5;ILK;SMAD1;SNTB1;MYC;RGS11;COL6A2;TOP2A;PPP1CC;PANX1;VCL;RASSF2;PAK1	0.084771	1.07175	0.267888
GO:0046696	lipopolysaccharide receptor complex	http://amigo.geneontology.org/amigo/term/GO:0046696	2	1196	6	17682	4.93467	7099;23643	TLR4;LY96	0.0870328	1.06032	0.267888
GO:0033179	proton-transporting V-type ATPase, V0 domain	http://amigo.geneontology.org/amigo/term/GO:0033179	2	1196	6	17682	4.93467	9114;533	ATP6V0D1;ATP6V0B	0.0870328	1.06032	0.267888
GO:0032045	guanyl-nucleotide exchange factor complex	http://amigo.geneontology.org/amigo/term/GO:0032045	2	1196	6	17682	4.93467	25780;9844	RASGRP3;ELMO1	0.0870328	1.06032	0.267888
GO:0071437	invadopodium	http://amigo.geneontology.org/amigo/term/GO:0071437	2	1196	6	17682	4.93467	22902;5058	RUFY3;PAK1	0.0870328	1.06032	0.267888
GO:0016012	sarcoglycan complex	http://amigo.geneontology.org/amigo/term/GO:0016012	2	1196	6	17682	4.93467	6444;6443	SGCD;SGCB	0.0870328	1.06032	0.267888
GO:0035749	myelin sheath adaxonal region	http://amigo.geneontology.org/amigo/term/GO:0035749	2	1196	6	17682	4.93467	5728;302	PTEN;ANXA2	0.0870328	1.06032	0.267888
GO:0005587	collagen type IV trimer	http://amigo.geneontology.org/amigo/term/GO:0005587	2	1196	6	17682	4.93467	1282;1284	COL4A1;COL4A2	0.0870328	1.06032	0.267888
GO:0005614	interstitial matrix	http://amigo.geneontology.org/amigo/term/GO:0005614	3	1196	14	17682	3.17351	3371;7373;151887	TNC;COL14A1;CCDC80	0.0887684	1.05174	0.269409
GO:0031091	platelet alpha granule	http://amigo.geneontology.org/amigo/term/GO:0031091	3	1196	14	17682	3.17351	6678;7058;5104	SPARC;THBS2;SERPINA5	0.0887684	1.05174	0.269409
GO:0031252	cell leading edge	http://amigo.geneontology.org/amigo/term/GO:0031252	5	1196	33	17682	2.24525	90102;4627;25;3693;7852	PHLDB2;MYH9;ABL1;ITGB5;CXCR4	0.0899436	1.04603	0.27108
GO:0016023	cytoplasmic membrane-bounded vesicle	http://amigo.geneontology.org/amigo/term/GO:0016023	13	1196	125	17682	1.54347	161;5321;7456;5159;58533;54874;397;4646;728;3791;4758;22918;7852	AP2A2;PLA2G4A;WIPF1;PDGFRB;SNX6;FNBP1L;ARHGDIB;MYO6;C5AR1;KDR;NEU1;CD93;CXCR4	0.0984313	1.00687	0.294615
GO:0072357	PTW/PP1 phosphatase complex	http://amigo.geneontology.org/amigo/term/GO:0072357	2	1196	7	17682	4.22948	80335;5501	WDR82;PPP1CC	0.107339	0.969244	0.31265
GO:0072559	NLRP3 inflammasome complex	http://amigo.geneontology.org/amigo/term/GO:0072559	2	1196	7	17682	4.22948	114548;834	NLRP3;CASP1	0.107339	0.969244	0.31265
GO:0016461	unconventional myosin complex	http://amigo.geneontology.org/amigo/term/GO:0016461	2	1196	7	17682	4.22948	4637;4646	MYL6;MYO6	0.107339	0.969244	0.31265
GO:0045179	apical cortex	http://amigo.geneontology.org/amigo/term/GO:0045179	2	1196	7	17682	4.22948	2760;4645	GM2A;MYO5B	0.107339	0.969244	0.31265
GO:0005667	transcription factor complex	http://amigo.geneontology.org/amigo/term/GO:0005667	17	1196	178	17682	1.41792	3091;9124;1499;51176;196;8013;3516;860;6495;9935;9079;2353;56938;7027;3725;6909;4086	HIF1A;PDLIM1;CTNNB1;LEF1;AHR;NR4A3;RBPJ;RUNX2;SIX1;MAFB;LDB2;FOS;ARNTL2;TFDP1;JUN;TBX2;SMAD1	0.113227	0.946049	0.327604
GO:0032839	dendrite cytoplasm	http://amigo.geneontology.org/amigo/term/GO:0032839	3	1196	16	17682	2.77651	1742;5594;7881	DLG4;MAPK1;KCNAB1	0.11537	0.937906	0.3295
GO:0030658	transport vesicle membrane	http://amigo.geneontology.org/amigo/term/GO:0030658	5	1196	36	17682	2.05779	3122;3118;972;3127;5872	HLA-DRA;HLA-DQA2;CD74;HLA-DRB5;RAB13	0.115401	0.937791	0.3295
GO:0005902	microvillus	http://amigo.geneontology.org/amigo/term/GO:0005902	6	1196	48	17682	1.85231	526;7430;284;4646;523;10788	ATP6V1B2;EZR;ANGPT1;MYO6;ATP6V1A;IQGAP2	0.125138	0.90261	0.349199
GO:0019898	extrinsic component of membrane	http://amigo.geneontology.org/amigo/term/GO:0019898	9	1196	83	17682	1.60769	257019;51375;58533;30846;7430;401548;1130;5329;10018	FRMD3;SNX7;SNX6;EHD2;EZR;SNX30;LYST;PLAUR;BCL2L11	0.128063	0.892578	0.349199
GO:0032432	actin filament bundle	http://amigo.geneontology.org/amigo/term/GO:0032432	2	1196	8	17682	3.70059	3936;2316	LCP1;FLNA	0.128737	0.890297	0.349199
GO:0033180	proton-transporting V-type ATPase, V1 domain	http://amigo.geneontology.org/amigo/term/GO:0033180	2	1196	8	17682	3.70059	526;523	ATP6V1B2;ATP6V1A	0.128737	0.890297	0.349199
GO:0070688	MLL5-L complex	http://amigo.geneontology.org/amigo/term/GO:0070688	2	1196	8	17682	3.70059	11329;5501	STK38;PPP1CC	0.128737	0.890297	0.349199
GO:0044853	plasma membrane raft	http://amigo.geneontology.org/amigo/term/GO:0044853	2	1196	8	17682	3.70059	3937;7430	LCP2;EZR	0.128737	0.890297	0.349199
GO:0031256	leading edge membrane	http://amigo.geneontology.org/amigo/term/GO:0031256	2	1196	8	17682	3.70059	5796;998	PTPRK;CDC42	0.128737	0.890297	0.349199
GO:0019773	proteasome core complex, alpha-subunit complex	http://amigo.geneontology.org/amigo/term/GO:0019773	2	1196	8	17682	3.70059	5685;5687	PSMA4;PSMA6	0.128737	0.890297	0.349199
GO:0031143	pseudopodium	http://amigo.geneontology.org/amigo/term/GO:0031143	3	1196	17	17682	2.61304	5594;824;87	MAPK1;CAPN2;ACTN1	0.129661	0.887192	0.34952
GO:0014069	postsynaptic density	http://amigo.geneontology.org/amigo/term/GO:0014069	12	1196	121	17682	1.47093	1742;409;6695;79953;775;3554;2534;1020;23413;4038;81831;55450	DLG4;ARRB2;SPOCK1;SYNDIG1;CACNA1C;IL1R1;FYN;CDK5;NCS1;LRP4;NETO2;CAMK2N1	0.137228	0.862557	0.367636
GO:0071556	integral component of lumenal side of endoplasmic reticulum membrane	http://amigo.geneontology.org/amigo/term/GO:0071556	4	1196	28	17682	2.11577	3122;3118;972;3127	HLA-DRA;HLA-DQA2;CD74;HLA-DRB5	0.141697	0.848638	0.37334
GO:1903561	extracellular vesicle	http://amigo.geneontology.org/amigo/term/GO:1903561	6	1196	50	17682	1.77802	1303;1293;30008;1292;7414;7280	COL12A1;COL6A3;EFEMP2;COL6A2;VCL;TUBB2A	0.141938	0.847902	0.37334
GO:0032588	trans-Golgi network membrane	http://amigo.geneontology.org/amigo/term/GO:0032588	6	1196	50	17682	1.77802	4430;3122;3118;972;3127;11031	MYO1B;HLA-DRA;HLA-DQA2;CD74;HLA-DRB5;RAB31	0.141938	0.847902	0.37334
GO:0001891	phagocytic cup	http://amigo.geneontology.org/amigo/term/GO:0001891	3	1196	18	17682	2.46773	199;3936;27	AIF1;LCP1;ABL2	0.144534	0.840029	0.377879
GO:0031225	anchored component of membrane	http://amigo.geneontology.org/amigo/term/GO:0031225	11	1196	111	17682	1.46943	1012;2215;8482;4684;965;2239;249;8876;135228;5329;4045	CDH13;FCGR3B;SEMA7A;NCAM1;CD58;GPC4;ALPL;VNN1;CD109;PLAUR;LSAMP	0.150533	0.822367	0.381032
GO:0005778	peroxisomal membrane	http://amigo.geneontology.org/amigo/term/GO:0005778	6	1196	51	17682	1.74305	55711;51762;847;4257;2180;50640	FAR2;RAB8B;CAT;MGST1;ACSL1;PNPLA8	0.150708	0.821865	0.381032
GO:0008290	F-actin capping protein complex	http://amigo.geneontology.org/amigo/term/GO:0008290	2	1196	9	17682	3.28922	822;832	CAPG;CAPZB	0.151008	0.820999	0.381032
GO:0032593	insulin-responsive compartment	http://amigo.geneontology.org/amigo/term/GO:0032593	2	1196	9	17682	3.28922	10890;5872	RAB10;RAB13	0.151008	0.820999	0.381032
GO:0000164	protein phosphatase type 1 complex	http://amigo.geneontology.org/amigo/term/GO:0000164	2	1196	9	17682	3.28922	84687;23645	PPP1R9B;PPP1R15A	0.151008	0.820999	0.381032
GO:0016342	catenin complex	http://amigo.geneontology.org/amigo/term/GO:0016342	2	1196	9	17682	3.28922	1499;1000	CTNNB1;CDH2	0.151008	0.820999	0.381032
GO:0030426	growth cone	http://amigo.geneontology.org/amigo/term/GO:0030426	10	1196	101	17682	1.4677	57616;7786;22902;22859;323;1020;7070;4628;5058;1627	TSHZ3;MAP3K12;RUFY3;ADGRL1;APBB2;CDK5;THY1;MYH10;PAK1;DBN1	0.165486	0.781239	0.415149
GO:0005819	spindle	http://amigo.geneontology.org/amigo/term/GO:0005819	11	1196	114	17682	1.43051	1063;4627;7272;6993;4281;6790;10112;55700;4628;5347;22974	CENPF;MYH9;TTK;DYNLT1;MID1;AURKA;KIF20A;MAP7D1;MYH10;PLK1;TPX2	0.168764	0.77272	0.419219
GO:0044224	juxtaparanode region of axon	http://amigo.geneontology.org/amigo/term/GO:0044224	2	1196	10	17682	2.96013	1742;7881	DLG4;KCNAB1	0.173956	0.75956	0.419219
GO:0097440	apical dendrite	http://amigo.geneontology.org/amigo/term/GO:0097440	2	1196	10	17682	2.96013	57282;2316	SLC4A10;FLNA	0.173956	0.75956	0.419219
GO:0031224	intrinsic component of membrane	http://amigo.geneontology.org/amigo/term/GO:0031224	2	1196	10	17682	2.96013	55013;3759	CCDC109B;KCNJ2	0.173956	0.75956	0.419219
GO:0001527	microfibril	http://amigo.geneontology.org/amigo/term/GO:0001527	2	1196	10	17682	2.96013	4052;2200	LTBP1;FBN1	0.173956	0.75956	0.419219
GO:0005773	vacuole	http://amigo.geneontology.org/amigo/term/GO:0005773	2	1196	10	17682	2.96013	8934;972	RAB29;CD74	0.173956	0.75956	0.419219
GO:0030669	clathrin-coated endocytic vesicle membrane	http://amigo.geneontology.org/amigo/term/GO:0030669	5	1196	42	17682	1.76322	161;3122;3118;972;3127	AP2A2;HLA-DRA;HLA-DQA2;CD74;HLA-DRB5	0.175037	0.756869	0.419219
GO:0060076	excitatory synapse	http://amigo.geneontology.org/amigo/term/GO:0060076	3	1196	20	17682	2.2207	1742;79953;9456	DLG4;SYNDIG1;HOMER1	0.175801	0.754978	0.419219
GO:0005922	connexon complex	http://amigo.geneontology.org/amigo/term/GO:0005922	3	1196	20	17682	2.2207	2697;10052;2701	GJA1;GJC1;GJA4	0.175801	0.754978	0.419219
GO:0005794	Golgi apparatus	http://amigo.geneontology.org/amigo/term/GO:0005794	62	1196	812	17682	1.13589	5205;2589;2885;129080;54757;10890;5594;10404;50515;6993;4893;6398;2697;84766;5321;8460;10112;57584;128338;55625;54843;89846;266727;649;84669;5874;11221;960;58485;5125;23213;2530;948;256987;2252;1277;23531;23621;3759;166929;79158;5730;1820;847;824;4646;2773;4121;51304;2131;5552;23645;3791;253832;1622;4322;382;9538;5872;5058;56681;9638	ATP8B1;GALNT1;GRB2;EMID1;FAM20A;RAB10;MAPK1;CPQ;CHST11;DYNLT1;NRAS;SECTM1;GJA1;CRACR2A;PLA2G4A;TPST1;KIF20A;ARHGAP21;DRAM2;ZDHHC7;SYTL2;FGD3;MDGA1;BMP1;USP32;RAB27B;DUSP10;CD44;TRAPPC1;PCSK5;SULF1;FUT8;CD36;SERINC5;FGF7;COL1A1;MMD;BACE1;KCNJ2;SGMS2;GNPTAB;PTGDS;ARID3A;CAT;CAPN2;MYO6;GNAI3;MAN1A1;ZDHHC3;EXT1;SRGN;PPP1R15A;KDR;ZDHHC20;DBI;MMP13;ARF6;EI24;RAB13;PAK1;SAR1A;FEZ1	0.190467	0.72018	0.45061
GO:0019897	extrinsic component of plasma membrane	http://amigo.geneontology.org/amigo/term/GO:0019897	3	1196	21	17682	2.11484	6281;54843;302	S100A10;SYTL2;ANXA2	0.19208	0.716517	0.45061
GO:0031362	anchored component of external side of plasma membrane	http://amigo.geneontology.org/amigo/term/GO:0031362	3	1196	21	17682	2.11484	2687;7070;2350	GGT5;THY1;FOLR2	0.19208	0.716517	0.45061
GO:0016327	apicolateral plasma membrane	http://amigo.geneontology.org/amigo/term/GO:0016327	2	1196	11	17682	2.69088	7082;100506658	TJP1;OCLN	0.197406	0.704639	0.455714
GO:0043220	Schmidt-Lanterman incisure	http://amigo.geneontology.org/amigo/term/GO:0043220	2	1196	11	17682	2.69088	5728;302	PTEN;ANXA2	0.197406	0.704639	0.455714
GO:0043194	axon initial segment	http://amigo.geneontology.org/amigo/term/GO:0043194	2	1196	11	17682	2.69088	23114;817	NFASC;CAMK2D	0.197406	0.704639	0.455714
GO:0005795	Golgi stack	http://amigo.geneontology.org/amigo/term/GO:0005795	4	1196	33	17682	1.79469	54947;5874;54922;23213	LPCAT2;RAB27B;RASIP1;SULF1	0.204949	0.688353	0.470624
GO:0043204	perikaryon	http://amigo.geneontology.org/amigo/term/GO:0043204	8	1196	82	17682	1.44535	5594;22902;199;7881;1020;6347;4671;10846	MAPK1;RUFY3;AIF1;KCNAB1;CDK5;CCL2;NAIP;PDE10A	0.210022	0.677734	0.479735
GO:0036464	cytoplasmic ribonucleoprotein granule	http://amigo.geneontology.org/amigo/term/GO:0036464	3	1196	23	17682	1.93072	7846;998;203068	TUBA1A;CDC42;TUBB	0.225654	0.646558	0.510071
GO:0034704	calcium channel complex	http://amigo.geneontology.org/amigo/term/GO:0034704	3	1196	23	17682	1.93072	55013;817;90550	CCDC109B;CAMK2D;MCU	0.225654	0.646558	0.510071
GO:0005739	mitochondrion	http://amigo.geneontology.org/amigo/term/GO:0005739	90	1196	1224	17682	1.09417	5728;160428;2876;54974;6678;7384;6714;5594;6586;2537;81855;8038;4313;2896;55013;167681;57406;4170;6474;3939;388753;5831;1545;4790;50507;11021;7298;23564;55967;5997;54541;637;1536;2760;6446;283459;2534;3429;65009;8655;23530;9997;157378;1586;8934;4628;983;3301;219970;4939;51762;50484;8564;9517;847;23022;6546;4257;56942;1508;90550;2747;10981;2055;51056;4938;114294;10312;23645;7390;25;3418;523;1622;5…	PTEN;ALDH1L2;GPX1;THG1L;SPARC;UQCRC1;SRC;MAPK1;SLIT3;IFI6;SFXN3;ADAM12;MMP2;GRN;CCDC109B;PRSS35;ABHD6;MCL1;SHOX2;LDHA;COA6;PYCR1;CYP1B1;NFKB1;NOX4;RAB35;TYMS;DDAH2;NDUFA12;RGS2;DDIT4;BID;CYBB;GM2A;SGK1;GATC;FYN;IFI27;NDRG4;DYNLL1;NNT;SCO2;TMEM65;CYP17A1;RAB29;MYH10;CDK1;DNAJA1;GLYATL2;OAS2;RAB8B;RRM2B;KMO;SPTLC2;CAT;PALLD;SLC8A1;MGST1;CMC2;CTSB;MCU;GLUD2;RAB32;CLN8;LAP3;OAS1;LACTB;TCIRG1;PPP1R15A…	0.229371	0.639461	0.515789
GO:0005769	early endosome	http://amigo.geneontology.org/amigo/term/GO:0005769	17	1196	203	17682	1.24153	2042;89853;5594;9114;2697;4430;8829;1889;84079;153020;11031;10981;3791;382;302;66008;7852	EPHA3;MVB12B;MAPK1;ATP6V0D1;GJA1;MYO1B;NRP1;ECE1;ANKRD27;RASGEF1B;RAB31;RAB32;KDR;ARF6;ANXA2;TRAK2;CXCR4	0.231748	0.634984	0.518446
GO:0005793	endoplasmic reticulum-Golgi intermediate compartment	http://amigo.geneontology.org/amigo/term/GO:0005793	6	1196	60	17682	1.48084	9262;871;64841;290;4121;2055	STK17B;SERPINH1;GNPNAT1;ANPEP;MAN1A1;CLN8	0.23907	0.621475	0.532083
GO:0016328	lateral plasma membrane	http://amigo.geneontology.org/amigo/term/GO:0016328	5	1196	48	17682	1.5423	1499;1756;23603;9076;5872	CTNNB1;DMD;CORO1C;CLDN1;RAB13	0.2438	0.612967	0.534262
GO:0030173	integral component of Golgi membrane	http://amigo.geneontology.org/amigo/term/GO:0030173	5	1196	48	17682	1.5423	6483;259230;7903;166929;55331	ST3GAL2;SGMS1;ST8SIA4;SGMS2;ACER3	0.2438	0.612967	0.534262
GO:0045178	basal part of cell	http://amigo.geneontology.org/amigo/term/GO:0045178	2	1196	13	17682	2.27664	2191;5547	FAP;PRCP	0.245207	0.610467	0.534262
GO:0016580	Sin3 complex	http://amigo.geneontology.org/amigo/term/GO:0016580	2	1196	13	17682	2.27664	23493;58516	HEY2;FAM60A	0.245207	0.610467	0.534262
GO:0005637	nuclear inner membrane	http://amigo.geneontology.org/amigo/term/GO:0005637	4	1196	36	17682	1.64485	11270;3429;84823;4086	NRM;IFI27;LMNB2;SMAD1	0.246204	0.608705	0.534262
GO:0000139	Golgi membrane	http://amigo.geneontology.org/amigo/term/GO:0000139	38	1196	497	17682	1.13467	10678;55697;2589;22856;6483;54947;205428;50515;4893;2697;8460;259230;152007;55512;11021;3122;57584;55625;9956;3118;4684;2530;7132;7903;9334;79158;972;3127;64841;4121;51304;2131;5552;998;153339;56034;50640;51311	B3GNT2;VAC14;GALNT1;CHSY1;ST3GAL2;LPCAT2;C3orf58;CHST11;NRAS;GJA1;TPST1;SGMS1;GLIPR2;SMPD3;RAB35;HLA-DRA;ARHGAP21;ZDHHC7;HS3ST2;HLA-DQA2;NCAM1;FUT8;TNFRSF1A;ST8SIA4;B4GALT5;GNPTAB;CD74;HLA-DRB5;GNPNAT1;MAN1A1;ZDHHC3;EXT1;SRGN;CDC42;TMEM167A;PDGFC;PNPLA8;TLR8	0.253507	0.59601	0.547373
GO:0005881	cytoplasmic microtubule	http://amigo.geneontology.org/amigo/term/GO:0005881	5	1196	49	17682	1.51074	4281;7846;58477;84790;26586	MID1;TUBA1A;SRPRB;TUBA1C;CKAP2	0.255908	0.591916	0.549822
GO:0005623	cell	http://amigo.geneontology.org/amigo/term/GO:0005623	6	1196	62	17682	1.43291	6357;54757;7046;9369;56833;7414	CCL13;FAM20A;TGFBR1;NRXN3;SLAMF8;VCL	0.260553	0.584104	0.557044
GO:0034707	chloride channel complex	http://amigo.geneontology.org/amigo/term/GO:0034707	5	1196	50	17682	1.48044	55107;2561;80727;196527;1192	ANO1;GABRB2;TTYH3;ANO6;CLIC1	0.268158	0.57161	0.567357
GO:0097060	synaptic membrane	http://amigo.geneontology.org/amigo/term/GO:0097060	2	1196	14	17682	2.1139	3688;4038	ITGB1;LRP4	0.269298	0.569766	0.567357
GO:0005746	mitochondrial respiratory chain	http://amigo.geneontology.org/amigo/term/GO:0005746	2	1196	14	17682	2.1139	7384;23530	UQCRC1;NNT	0.269298	0.569766	0.567357
GO:0000777	condensed chromosome kinetochore	http://amigo.geneontology.org/amigo/term/GO:0000777	7	1196	76	17682	1.36384	55839;10403;387103;79172;5501;57405;55355	CENPN;NDC80;CENPW;CENPO;PPP1CC;SPC25;HJURP	0.272385	0.564817	0.568342
GO:0032580	Golgi cisterna membrane	http://amigo.geneontology.org/amigo/term/GO:0032580	7	1196	76	17682	1.36384	2589;22856;6483;170384;2530;23413;9334	GALNT1;CHSY1;ST3GAL2;FUT11;FUT8;NCS1;B4GALT5	0.272385	0.564817	0.568342
GO:0005796	Golgi lumen	http://amigo.geneontology.org/amigo/term/GO:0005796	8	1196	90	17682	1.31627	4323;4325;5125;3339;375790;1462;2239;81029	MMP14;MMP16;PCSK5;HSPG2;AGRN;VCAN;GPC4;WNT5B	0.281104	0.551132	0.583729
GO:0012507	ER to Golgi transport vesicle membrane	http://amigo.geneontology.org/amigo/term/GO:0012507	4	1196	39	17682	1.51807	3122;3118;972;3127	HLA-DRA;HLA-DQA2;CD74;HLA-DRB5	0.289053	0.539022	0.594963
GO:0005868	cytoplasmic dynein complex	http://amigo.geneontology.org/amigo/term/GO:0005868	2	1196	15	17682	1.97286	6993;8655	DYNLT1;DYNLL1	0.293369	0.532586	0.594963
GO:0030140	trans-Golgi network transport vesicle	http://amigo.geneontology.org/amigo/term/GO:0030140	2	1196	15	17682	1.97286	5874;51762	RAB27B;RAB8B	0.293369	0.532586	0.594963
GO:0005859	muscle myosin complex	http://amigo.geneontology.org/amigo/term/GO:0005859	2	1196	15	17682	1.97286	4629;10398	MYH11;MYL9	0.293369	0.532586	0.594963
GO:0033268	node of Ranvier	http://amigo.geneontology.org/amigo/term/GO:0033268	2	1196	15	17682	1.97286	6695;23114	SPOCK1;NFASC	0.293369	0.532586	0.594963
GO:0015630	microtubule cytoskeleton	http://amigo.geneontology.org/amigo/term/GO:0015630	11	1196	132	17682	1.23418	81930;5594;6790;55700;3399;1130;5347;283431;9638;22974;26586	KIF18A;MAPK1;AURKA;MAP7D1;ID3;LYST;PLK1;GAS2L3;FEZ1;TPX2;CKAP2	0.296862	0.527445	0.599248
GO:0045202	synapse	http://amigo.geneontology.org/amigo/term/GO:0045202	15	1196	189	17682	1.17556	1742;4311;1000;1756;22859;323;2561;6347;30011;1837;1947;375790;55740;6641;133418	DLG4;MME;CDH2;DMD;ADGRL1;APBB2;GABRB2;CCL2;SH3KBP1;DTNA;EFNB1;AGRN;ENAH;SNTB1;EMB	0.312844	0.504672	0.61024
GO:0071682	endocytic vesicle lumen	http://amigo.geneontology.org/amigo/term/GO:0071682	2	1196	16	17682	1.84946	6678;10808	SPARC;HSPH1	0.317325	0.498496	0.61024
GO:0017059	serine C-palmitoyltransferase complex	http://amigo.geneontology.org/amigo/term/GO:0017059	1	1196	5	17682	2.95849	9517	SPTLC2	0.324805	0.488377	0.61024
GO:0043657	host cell	http://amigo.geneontology.org/amigo/term/GO:0043657	1	1196	5	17682	2.95849	6993	DYNLT1	0.324805	0.488377	0.61024
GO:0034705	potassium channel complex	http://amigo.geneontology.org/amigo/term/GO:0034705	1	1196	5	17682	2.95849	7881	KCNAB1	0.324805	0.488377	0.61024
GO:0000347	THO complex	http://amigo.geneontology.org/amigo/term/GO:0000347	1	1196	5	17682	2.95849	79228	THOC6	0.324805	0.488377	0.61024
GO:0043292	contractile fiber	http://amigo.geneontology.org/amigo/term/GO:0043292	1	1196	5	17682	2.95849	1471	CST3	0.324805	0.488377	0.61024
GO:0097431	mitotic spindle pole	http://amigo.geneontology.org/amigo/term/GO:0097431	1	1196	5	17682	2.95849	259266	ASPM	0.324805	0.488377	0.61024
GO:0033010	paranodal junction	http://amigo.geneontology.org/amigo/term/GO:0033010	1	1196	5	17682	2.95849	23114	NFASC	0.324805	0.488377	0.61024
GO:0044300	cerebellar mossy fiber	http://amigo.geneontology.org/amigo/term/GO:0044300	1	1196	5	17682	2.95849	1742	DLG4	0.324805	0.488377	0.61024
GO:0031465	Cul4B-RING E3 ubiquitin ligase complex	http://amigo.geneontology.org/amigo/term/GO:0031465	1	1196	5	17682	2.95849	51514	DTL	0.324805	0.488377	0.61024
GO:0033093	Weibel-Palade body	http://amigo.geneontology.org/amigo/term/GO:0033093	1	1196	5	17682	2.95849	1889	ECE1	0.324805	0.488377	0.61024
GO:0005927	muscle tendon junction	http://amigo.geneontology.org/amigo/term/GO:0005927	1	1196	5	17682	2.95849	3679	ITGA7	0.324805	0.488377	0.61024
GO:0032133	chromosome passenger complex	http://amigo.geneontology.org/amigo/term/GO:0032133	1	1196	5	17682	2.95849	6790	AURKA	0.324805	0.488377	0.61024
GO:0016469	proton-transporting two-sector ATPase complex	http://amigo.geneontology.org/amigo/term/GO:0016469	1	1196	5	17682	2.95849	523	ATP6V1A	0.324805	0.488377	0.61024
GO:0031088	platelet dense granule membrane	http://amigo.geneontology.org/amigo/term/GO:0031088	1	1196	5	17682	2.95849	3920	LAMP2	0.324805	0.488377	0.61024
GO:0043005	neuron projection	http://amigo.geneontology.org/amigo/term/GO:0043005	19	1196	247	17682	1.13947	5728;10159;6275;1012;4828;22859;2561;5997;4671;30011;3984;84079;2353;4651;8321;998;5872;623;4045	PTEN;ATP6AP2;S100A4;CDH13;NMB;ADGRL1;GABRB2;RGS2;NAIP;SH3KBP1;LIMK1;ANKRD27;FOS;MYO10;FZD1;CDC42;RAB13;BDKRB1;LSAMP	0.327393	0.484931	0.61245
GO:0030054	cell junction	http://amigo.geneontology.org/amigo/term/GO:0030054	31	1196	420	17682	1.09365	1742;7082;79953;1499;5175;1003;100506658;79822;285590;9644;22859;2561;57584;10437;115207;55752;1020;23413;1837;387;375790;55740;4131;3611;9456;55450;3791;4758;133418;57689;7852	DLG4;TJP1;SYNDIG1;CTNNB1;PECAM1;CDH5;OCLN;ARHGAP28;SH3PXD2B;SH3PXD2A;ADGRL1;GABRB2;ARHGAP21;IFI30;KCTD12;SEPT11;CDK5;NCS1;DTNA;RHOA;AGRN;ENAH;MAP1B;ILK;HOMER1;CAMK2N1;KDR;NEU1;EMB;LRRC4C;CXCR4	0.344505	0.462805	0.638145
GO:0031410	cytoplasmic vesicle	http://amigo.geneontology.org/amigo/term/GO:0031410	11	1196	139	17682	1.17156	409;4323;100506658;221395;79065;64123;8829;9510;26509;5872;7852	ARRB2;MMP14;OCLN;ADGRF5;ATG9A;ADGRL4;NRP1;ADAMTS1;MYOF;RAB13;CXCR4	0.352684	0.452614	0.638145
GO:0000145	exocyst	http://amigo.geneontology.org/amigo/term/GO:0000145	2	1196	18	17682	1.64377	10890;7127	RAB10;TNFAIP2	0.364576	0.438212	0.638145
GO:0005657	replication fork	http://amigo.geneontology.org/amigo/term/GO:0005657	2	1196	18	17682	1.64377	3014;7516	H2AFX;XRCC2	0.364576	0.438212	0.638145
GO:0031305	integral component of mitochondrial inner membrane	http://amigo.geneontology.org/amigo/term/GO:0031305	2	1196	18	17682	1.64377	55013;90550	CCDC109B;MCU	0.364576	0.438212	0.638145
GO:0044292	dendrite terminus	http://amigo.geneontology.org/amigo/term/GO:0044292	1	1196	6	17682	2.46527	8786	RGS11	0.367595	0.43463	0.638145
GO:0035748	myelin sheath abaxonal region	http://amigo.geneontology.org/amigo/term/GO:0035748	1	1196	6	17682	2.46527	3688	ITGB1	0.367595	0.43463	0.638145
GO:0033256	I-kappaB/NF-kappaB complex	http://amigo.geneontology.org/amigo/term/GO:0033256	1	1196	6	17682	2.46527	4790	NFKB1	0.367595	0.43463	0.638145
GO:0005663	DNA replication factor C complex	http://amigo.geneontology.org/amigo/term/GO:0005663	1	1196	6	17682	2.46527	5111	PCNA	0.367595	0.43463	0.638145
GO:0000138	Golgi trans cisterna	http://amigo.geneontology.org/amigo/term/GO:0000138	1	1196	6	17682	2.46527	259230	SGMS1	0.367595	0.43463	0.638145
GO:0045180	basal cortex	http://amigo.geneontology.org/amigo/term/GO:0045180	1	1196	6	17682	2.46527	90102	PHLDB2	0.367595	0.43463	0.638145
GO:0031265	CD95 death-inducing signaling complex	http://amigo.geneontology.org/amigo/term/GO:0031265	1	1196	6	17682	2.46527	355	FAS	0.367595	0.43463	0.638145
GO:0005828	kinetochore microtubule	http://amigo.geneontology.org/amigo/term/GO:0005828	1	1196	6	17682	2.46527	81930	KIF18A	0.367595	0.43463	0.638145
GO:0097169	AIM2 inflammasome complex	http://amigo.geneontology.org/amigo/term/GO:0097169	1	1196	6	17682	2.46527	834	CASP1	0.367595	0.43463	0.638145
GO:0001940	male pronucleus	http://amigo.geneontology.org/amigo/term/GO:0001940	1	1196	6	17682	2.46527	890	CCNA2	0.367595	0.43463	0.638145
GO:0071986	Ragulator complex	http://amigo.geneontology.org/amigo/term/GO:0071986	1	1196	6	17682	2.46527	28956	LAMTOR2	0.367595	0.43463	0.638145
GO:0033588	Elongator holoenzyme complex	http://amigo.geneontology.org/amigo/term/GO:0033588	1	1196	6	17682	2.46527	23587	ELP5	0.367595	0.43463	0.638145
GO:0000445	THO complex part of transcription export complex	http://amigo.geneontology.org/amigo/term/GO:0000445	1	1196	6	17682	2.46527	79228	THOC6	0.367595	0.43463	0.638145
GO:0008076	voltage-gated potassium channel complex	http://amigo.geneontology.org/amigo/term/GO:0008076	7	1196	86	17682	1.20457	1742;3762;10060;7881;3759;3776;3783	DLG4;KCNJ5;ABCC9;KCNAB1;KCNJ2;KCNK2;KCNN4	0.37564	0.425228	0.649011
GO:0005791	rough endoplasmic reticulum	http://amigo.geneontology.org/amigo/term/GO:0005791	4	1196	45	17682	1.31521	4133;6347;3759;5730	MAP2;CCL2;KCNJ2;PTGDS	0.376845	0.423837	0.649011
GO:0012505	endomembrane system	http://amigo.geneontology.org/amigo/term/GO:0012505	7	1196	87	17682	1.19066	526;1794;9732;6252;1130;80380;10018	ATP6V1B2;DOCK2;DOCK4;RTN1;LYST;PDCD1LG2;BCL2L11	0.386175	0.413216	0.66245
GO:0031264	death-inducing signaling complex	http://amigo.geneontology.org/amigo/term/GO:0031264	1	1196	7	17682	2.11297	355	FAS	0.407676	0.389685	0.669794
GO:0071782	endoplasmic reticulum tubular network	http://amigo.geneontology.org/amigo/term/GO:0071782	1	1196	7	17682	2.11297	10890	RAB10	0.407676	0.389685	0.669794
GO:0032585	multivesicular body membrane	http://amigo.geneontology.org/amigo/term/GO:0032585	1	1196	7	17682	2.11297	5874	RAB27B	0.407676	0.389685	0.669794
GO:0005652	nuclear lamina	http://amigo.geneontology.org/amigo/term/GO:0005652	1	1196	7	17682	2.11297	4000	LMNA	0.407676	0.389685	0.669794
GO:0000137	Golgi cis cisterna	http://amigo.geneontology.org/amigo/term/GO:0000137	1	1196	7	17682	2.11297	55512	SMPD3	0.407676	0.389685	0.669794
GO:0032983	kainate selective glutamate receptor complex	http://amigo.geneontology.org/amigo/term/GO:0032983	1	1196	7	17682	2.11297	81831	NETO2	0.407676	0.389685	0.669794
GO:0071141	SMAD protein complex	http://amigo.geneontology.org/amigo/term/GO:0071141	1	1196	7	17682	2.11297	4086	SMAD1	0.407676	0.389685	0.669794
GO:0030056	hemidesmosome	http://amigo.geneontology.org/amigo/term/GO:0030056	1	1196	7	17682	2.11297	5339	PLEC	0.407676	0.389685	0.669794
GO:0032592	integral component of mitochondrial membrane	http://amigo.geneontology.org/amigo/term/GO:0032592	1	1196	7	17682	2.11297	637	BID	0.407676	0.389685	0.669794
GO:0032584	growth cone membrane	http://amigo.geneontology.org/amigo/term/GO:0032584	1	1196	7	17682	2.11297	51393	TRPV2	0.407676	0.389685	0.669794
GO:0005774	vacuolar membrane	http://amigo.geneontology.org/amigo/term/GO:0005774	2	1196	20	17682	1.47923	533;4125	ATP6V0B;MAN2B1	0.410519	0.386667	0.669794
GO:0005839	proteasome core complex	http://amigo.geneontology.org/amigo/term/GO:0005839	2	1196	20	17682	1.47923	5685;5687	PSMA4;PSMA6	0.410519	0.386667	0.669794
GO:0032993	protein-DNA complex	http://amigo.geneontology.org/amigo/term/GO:0032993	2	1196	20	17682	1.47923	1499;51176	CTNNB1;LEF1	0.410519	0.386667	0.669794
GO:0005782	peroxisomal matrix	http://amigo.geneontology.org/amigo/term/GO:0005782	3	1196	34	17682	1.30526	55711;8309;847	FAR2;ACOX2;CAT	0.418629	0.37817	0.67793
GO:0008180	COP9 signalosome	http://amigo.geneontology.org/amigo/term/GO:0008180	3	1196	34	17682	1.30526	2885;4627;8655	GRB2;MYH9;DYNLL1	0.418629	0.37817	0.67793
GO:0005802	trans-Golgi network	http://amigo.geneontology.org/amigo/term/GO:0005802	10	1196	133	17682	1.11254	10890;79065;8934;23621;2316;10981;51056;9265;10631;5872	RAB10;ATG9A;RAB29;BACE1;FLNA;RAB32;LAP3;CYTH3;POSTN;RAB13	0.420662	0.376067	0.678689
GO:0014731	spectrin-associated cytoskeleton	http://amigo.geneontology.org/amigo/term/GO:0014731	1	1196	8	17682	1.84874	6711	SPTBN1	0.445218	0.351428	0.680368
GO:0005750	mitochondrial respiratory chain complex III	http://amigo.geneontology.org/amigo/term/GO:0005750	1	1196	8	17682	1.84874	7384	UQCRC1	0.445218	0.351428	0.680368
GO:0005915	zonula adherens	http://amigo.geneontology.org/amigo/term/GO:0005915	1	1196	8	17682	1.84874	7414	VCL	0.445218	0.351428	0.680368
GO:0031209	SCAR complex	http://amigo.geneontology.org/amigo/term/GO:0031209	1	1196	8	17682	1.84874	3071	NCKAP1L	0.445218	0.351428	0.680368
GO:0043596	nuclear replication fork	http://amigo.geneontology.org/amigo/term/GO:0043596	1	1196	8	17682	1.84874	5111	PCNA	0.445218	0.351428	0.680368
GO:0090543	Flemming body	http://amigo.geneontology.org/amigo/term/GO:0090543	1	1196	8	17682	1.84874	822	CAPG	0.445218	0.351428	0.680368
GO:0042589	zymogen granule membrane	http://amigo.geneontology.org/amigo/term/GO:0042589	1	1196	8	17682	1.84874	5874	RAB27B	0.445218	0.351428	0.680368
GO:0070852	cell body fiber	http://amigo.geneontology.org/amigo/term/GO:0070852	1	1196	8	17682	1.84874	23705	CADM1	0.445218	0.351428	0.680368
GO:1990712	HFE-transferrin receptor complex	http://amigo.geneontology.org/amigo/term/GO:1990712	1	1196	8	17682	1.84874	658	BMPR1B	0.445218	0.351428	0.680368
GO:0030867	rough endoplasmic reticulum membrane	http://amigo.geneontology.org/amigo/term/GO:0030867	1	1196	8	17682	1.84874	5351	PLOD1	0.445218	0.351428	0.680368
GO:0036057	slit diaphragm	http://amigo.geneontology.org/amigo/term/GO:0036057	1	1196	8	17682	1.84874	5420	PODXL	0.445218	0.351428	0.680368
GO:0043196	varicosity	http://amigo.geneontology.org/amigo/term/GO:0043196	1	1196	8	17682	1.84874	23705	CADM1	0.445218	0.351428	0.680368
GO:1990023	mitotic spindle midzone	http://amigo.geneontology.org/amigo/term/GO:1990023	1	1196	8	17682	1.84874	55920	RCC2	0.445218	0.351428	0.680368
GO:0001939	female pronucleus	http://amigo.geneontology.org/amigo/term/GO:0001939	1	1196	8	17682	1.84874	890	CCNA2	0.445218	0.351428	0.680368
GO:0005641	nuclear envelope lumen	http://amigo.geneontology.org/amigo/term/GO:0005641	1	1196	8	17682	1.84874	203068	TUBB	0.445218	0.351428	0.680368
GO:0001750	photoreceptor outer segment	http://amigo.geneontology.org/amigo/term/GO:0001750	4	1196	50	17682	1.18336	4130;2776;5796;4131	MAP1A;GNAQ;PTPRK;MAP1B	0.449353	0.347412	0.684278
GO:0005680	anaphase-promoting complex	http://amigo.geneontology.org/amigo/term/GO:0005680	2	1196	22	17682	1.3446	11065;25906	UBE2C;ANAPC15	0.454763	0.342215	0.685809
GO:0012506	vesicle membrane	http://amigo.geneontology.org/amigo/term/GO:0012506	2	1196	22	17682	1.3446	2885;7454	GRB2;WAS	0.454763	0.342215	0.685809
GO:0005635	nuclear envelope	http://amigo.geneontology.org/amigo/term/GO:0005635	10	1196	139	17682	1.06415	1063;5880;11270;55379;241;4745;4000;26509;581;1192	CENPF;RAC2;NRM;LRRC59;ALOX5AP;NELL1;LMNA;MYOF;BAX;CLIC1	0.472395	0.325695	0.685809
GO:0017053	transcriptional repressor complex	http://amigo.geneontology.org/amigo/term/GO:0017053	4	1196	52	17682	1.13771	23493;55635;595;3725	HEY2;DEPDC1;CCND1;JUN	0.477644	0.320895	0.685809
GO:0000775	chromosome, centromeric region	http://amigo.geneontology.org/amigo/term/GO:0000775	4	1196	52	17682	1.13771	1063;10403;387103;55355	CENPF;NDC80;CENPW;HJURP	0.477644	0.320895	0.685809
GO:0000813	ESCRT I complex	http://amigo.geneontology.org/amigo/term/GO:0000813	1	1196	9	17682	1.64324	89853	MVB12B	0.480382	0.318413	0.685809
GO:0005883	neurofilament	http://amigo.geneontology.org/amigo/term/GO:0005883	1	1196	9	17682	1.64324	8829	NRP1	0.480382	0.318413	0.685809
GO:0046930	pore complex	http://amigo.geneontology.org/amigo/term/GO:0046930	1	1196	9	17682	1.64324	581	BAX	0.480382	0.318413	0.685809
GO:0005832	chaperonin-containing T-complex	http://amigo.geneontology.org/amigo/term/GO:0005832	1	1196	9	17682	1.64324	22948	CCT5	0.480382	0.318413	0.685809
GO:0000940	condensed chromosome outer kinetochore	http://amigo.geneontology.org/amigo/term/GO:0000940	1	1196	9	17682	1.64324	1063	CENPF	0.480382	0.318413	0.685809
GO:0048188	Set1C/COMPASS complex	http://amigo.geneontology.org/amigo/term/GO:0048188	1	1196	9	17682	1.64324	80335	WDR82	0.480382	0.318413	0.685809
GO:0005740	mitochondrial envelope	http://amigo.geneontology.org/amigo/term/GO:0005740	1	1196	9	17682	1.64324	55803	ADAP2	0.480382	0.318413	0.685809
GO:0016591	DNA-directed RNA polymerase II, holoenzyme	http://amigo.geneontology.org/amigo/term/GO:0016591	1	1196	9	17682	1.64324	4646	MYO6	0.480382	0.318413	0.685809
GO:0008328	ionotropic glutamate receptor complex	http://amigo.geneontology.org/amigo/term/GO:0008328	1	1196	9	17682	1.64324	1742	DLG4	0.480382	0.318413	0.685809
GO:0031464	Cul4A-RING E3 ubiquitin ligase complex	http://amigo.geneontology.org/amigo/term/GO:0031464	1	1196	9	17682	1.64324	51514	DTL	0.480382	0.318413	0.685809
GO:0000812	Swr1 complex	http://amigo.geneontology.org/amigo/term/GO:0000812	1	1196	9	17682	1.64324	10467	ZNHIT1	0.480382	0.318413	0.685809
GO:0008091	spectrin	http://amigo.geneontology.org/amigo/term/GO:0008091	1	1196	9	17682	1.64324	6711	SPTBN1	0.480382	0.318413	0.685809
GO:0031045	dense core granule	http://amigo.geneontology.org/amigo/term/GO:0031045	1	1196	9	17682	1.64324	23413	NCS1	0.480382	0.318413	0.685809
GO:0000780	condensed nuclear chromosome, centromeric region	http://amigo.geneontology.org/amigo/term/GO:0000780	1	1196	9	17682	1.64324	6790	AURKA	0.480382	0.318413	0.685809
GO:0000776	kinetochore	http://amigo.geneontology.org/amigo/term/GO:0000776	5	1196	68	17682	1.08745	1063;10403;8655;387103;5347	CENPF;NDC80;DYNLL1;CENPW;PLK1	0.495449	0.305001	0.704943
GO:0005719	nuclear euchromatin	http://amigo.geneontology.org/amigo/term/GO:0005719	2	1196	24	17682	1.23241	1499;3725	CTNNB1;JUN	0.497034	0.303614	0.704943
GO:0005942	phosphatidylinositol 3-kinase complex	http://amigo.geneontology.org/amigo/term/GO:0005942	1	1196	10	17682	1.47883	5287	PIK3C2B	0.51332	0.289612	0.714041
GO:0030877	beta-catenin destruction complex	http://amigo.geneontology.org/amigo/term/GO:0030877	1	1196	10	17682	1.47883	1499	CTNNB1	0.51332	0.289612	0.714041
GO:0031616	spindle pole centrosome	http://amigo.geneontology.org/amigo/term/GO:0031616	1	1196	10	17682	1.47883	6790	AURKA	0.51332	0.289612	0.714041
GO:0030117	membrane coat	http://amigo.geneontology.org/amigo/term/GO:0030117	1	1196	10	17682	1.47883	1759	DNM1	0.51332	0.289612	0.714041
GO:0035686	sperm fibrous sheath	http://amigo.geneontology.org/amigo/term/GO:0035686	1	1196	10	17682	1.47883	3939	LDHA	0.51332	0.289612	0.714041
GO:0070382	exocytic vesicle	http://amigo.geneontology.org/amigo/term/GO:0070382	1	1196	10	17682	1.47883	54843	SYTL2	0.51332	0.289612	0.714041
GO:0008021	synaptic vesicle	http://amigo.geneontology.org/amigo/term/GO:0008021	6	1196	85	17682	1.04382	1742;4311;9627;9114;51762;23705	DLG4;MME;SNCAIP;ATP6V0D1;RAB8B;CADM1	0.520379	0.28368	0.720233
GO:0000922	spindle pole	http://amigo.geneontology.org/amigo/term/GO:0000922	7	1196	100	17682	1.03511	1063;1499;994;10783;5347;22974;26586	CENPF;CTNNB1;CDC25B;NEK6;PLK1;TPX2;CKAP2	0.521091	0.283087	0.720233
GO:0005801	cis-Golgi network	http://amigo.geneontology.org/amigo/term/GO:0005801	3	1196	41	17682	1.08198	10745;58485;51226	PHTF1;TRAPPC1;COPZ2	0.533965	0.272488	0.731177
GO:0090575	RNA polymerase II transcription factor complex	http://amigo.geneontology.org/amigo/term/GO:0090575	2	1196	26	17682	1.13748	3091;7421	HIF1A;VDR	0.537149	0.269905	0.731177
GO:0000794	condensed nuclear chromosome	http://amigo.geneontology.org/amigo/term/GO:0000794	2	1196	26	17682	1.13748	3014;120	H2AFX;ADD3	0.537149	0.269905	0.731177
GO:0030665	clathrin-coated vesicle membrane	http://amigo.geneontology.org/amigo/term/GO:0030665	1	1196	11	17682	1.34431	4646	MYO6	0.544171	0.264265	0.731177
GO:0030122	AP-2 adaptor complex	http://amigo.geneontology.org/amigo/term/GO:0030122	1	1196	11	17682	1.34431	161	AP2A2	0.544171	0.264265	0.731177
GO:0005890	sodium:potassium-exchanging ATPase complex	http://amigo.geneontology.org/amigo/term/GO:0005890	1	1196	11	17682	1.34431	483	ATP1B3	0.544171	0.264265	0.731177
GO:0002199	zona pellucida receptor complex	http://amigo.geneontology.org/amigo/term/GO:0002199	1	1196	11	17682	1.34431	22948	CCT5	0.544171	0.264265	0.731177
GO:0033270	paranode region of axon	http://amigo.geneontology.org/amigo/term/GO:0033270	1	1196	11	17682	1.34431	23114	NFASC	0.544171	0.264265	0.731177
GO:0005885	Arp2/3 protein complex	http://amigo.geneontology.org/amigo/term/GO:0005885	1	1196	11	17682	1.34431	10092	ARPC5	0.544171	0.264265	0.731177
GO:0030425	dendrite	http://amigo.geneontology.org/amigo/term/GO:0030425	19	1196	284	17682	0.988913	4311;2775;22902;1020;6347;7070;23413;658;4038;5796;824;55450;23705;57125;10769;5058;9638;1627;51022	MME;GNAO1;RUFY3;CDK5;CCL2;THY1;NCS1;BMPR1B;LRP4;PTPRK;CAPN2;CAMK2N1;CADM1;PLXDC1;PLK2;PAK1;FEZ1;DBN1;GLRX2	0.552711	0.257502	0.74036
GO:0005790	smooth endoplasmic reticulum	http://amigo.geneontology.org/amigo/term/GO:0005790	2	1196	27	17682	1.09529	4133;3759	MAP2;KCNJ2	0.556362	0.254642	0.740679
GO:0032420	stereocilium	http://amigo.geneontology.org/amigo/term/GO:0032420	2	1196	27	17682	1.09529	5205;9732	ATP8B1;DOCK4	0.556362	0.254642	0.740679
GO:0009898	cytoplasmic side of plasma membrane	http://amigo.geneontology.org/amigo/term/GO:0009898	3	1196	43	17682	1.03154	5728;5997;2760	PTEN;RGS2;GM2A	0.564488	0.248345	0.749198
GO:0034399	nuclear periphery	http://amigo.geneontology.org/amigo/term/GO:0034399	1	1196	12	17682	1.23222	4133	MAP2	0.573068	0.241794	0.753671
GO:0071203	WASH complex	http://amigo.geneontology.org/amigo/term/GO:0071203	1	1196	12	17682	1.23222	832	CAPZB	0.573068	0.241794	0.753671
GO:0005732	small nucleolar ribonucleoprotein complex	http://amigo.geneontology.org/amigo/term/GO:0005732	1	1196	12	17682	1.23222	55505	NOP10	0.573068	0.241794	0.753671
GO:0032281	AMPA glutamate receptor complex	http://amigo.geneontology.org/amigo/term/GO:0032281	2	1196	28	17682	1.05611	1742;57406	DLG4;ABHD6	0.575001	0.240331	0.753929
GO:0005811	lipid particle	http://amigo.geneontology.org/amigo/term/GO:0005811	4	1196	60	17682	0.98557	54947;29923;51170;302	LPCAT2;HILPDA;HSD17B11;ANXA2	0.58414	0.233483	0.763605
GO:0031526	brush border membrane	http://amigo.geneontology.org/amigo/term/GO:0031526	3	1196	45	17682	0.985583	5205;10672;5745	ATP8B1;GNA13;PTH1R	0.593758	0.226391	0.763807
GO:0032039	integrator complex	http://amigo.geneontology.org/amigo/term/GO:0032039	1	1196	13	17682	1.13737	25896	INTS7	0.600134	0.221751	0.763807
GO:0042627	chylomicron	http://amigo.geneontology.org/amigo/term/GO:0042627	1	1196	13	17682	1.13737	341	APOC1	0.600134	0.221751	0.763807
GO:0044295	axonal growth cone	http://amigo.geneontology.org/amigo/term/GO:0044295	1	1196	13	17682	1.13737	51393	TRPV2	0.600134	0.221751	0.763807
GO:0032433	filopodium tip	http://amigo.geneontology.org/amigo/term/GO:0032433	1	1196	13	17682	1.13737	4651	MYO10	0.600134	0.221751	0.763807
GO:0005639	integral component of nuclear inner membrane	http://amigo.geneontology.org/amigo/term/GO:0005639	1	1196	13	17682	1.13737	5027	P2RX7	0.600134	0.221751	0.763807
GO:0044798	nuclear transcription factor complex	http://amigo.geneontology.org/amigo/term/GO:0044798	1	1196	13	17682	1.13737	1499	CTNNB1	0.600134	0.221751	0.763807
GO:0044291	cell-cell contact zone	http://amigo.geneontology.org/amigo/term/GO:0044291	1	1196	13	17682	1.13737	5912	RAP2B	0.600134	0.221751	0.763807
GO:0000346	transcription export complex	http://amigo.geneontology.org/amigo/term/GO:0000346	1	1196	13	17682	1.13737	79228	THOC6	0.600134	0.221751	0.763807
GO:0034362	low-density lipoprotein particle	http://amigo.geneontology.org/amigo/term/GO:0034362	1	1196	14	17682	1.05607	4481	MSR1	0.625486	0.203782	0.791432
GO:0001518	voltage-gated sodium channel complex	http://amigo.geneontology.org/amigo/term/GO:0001518	1	1196	14	17682	1.05607	6335	SCN9A	0.625486	0.203782	0.791432
GO:0016363	nuclear matrix	http://amigo.geneontology.org/amigo/term/GO:0016363	6	1196	96	17682	0.923634	1063;6678;4000;5687;387103;1072	CENPF;SPARC;LMNA;PSMA6;CENPW;CFL1	0.633046	0.198565	0.798668
GO:0043231	intracellular membrane-bounded organelle	http://amigo.geneontology.org/amigo/term/GO:0043231	31	1196	483	17682	0.947528	526;54209;51514;1026;2896;5476;1798;5685;128338;55625;2983;10437;1284;1522;23413;8140;1894;4939;54443;5724;1462;847;942;1520;1508;26509;54809;4758;4200;2004;51022	ATP6V1B2;TREM2;DTL;CDKN1A;GRN;CTSA;DPAGT1;PSMA4;DRAM2;ZDHHC7;GUCY1B3;IFI30;COL4A2;CTSZ;NCS1;SLC7A5;ECT2;OAS2;ANLN;PTAFR;VCAN;CAT;CD86;CTSS;CTSB;MYOF;SAMD9;NEU1;ME2;ELK3;GLRX2	0.639437	0.194202	0.804393
GO:0030673	axolemma	http://amigo.geneontology.org/amigo/term/GO:0030673	1	1196	15	17682	0.985607	6711	SPTBN1	0.649232	0.1876	0.807355
GO:0042101	T cell receptor complex	http://amigo.geneontology.org/amigo/term/GO:0042101	1	1196	15	17682	0.985607	54518	APBB1IP	0.649232	0.1876	0.807355
GO:0031235	intrinsic component of the cytoplasmic side of the plasma membrane	http://amigo.geneontology.org/amigo/term/GO:0031235	1	1196	15	17682	0.985607	9462	RASAL2	0.649232	0.1876	0.807355
GO:0005671	Ada2/Gcn5/Ada3 transcription activator complex	http://amigo.geneontology.org/amigo/term/GO:0005671	1	1196	15	17682	0.985607	1810	DR1	0.649232	0.1876	0.807355
GO:0005844	polysome	http://amigo.geneontology.org/amigo/term/GO:0005844	2	1196	33	17682	0.895843	1618;5687	DAZL;PSMA6	0.65952	0.180772	0.816849
GO:0005871	kinesin complex	http://amigo.geneontology.org/amigo/term/GO:0005871	3	1196	50	17682	0.886773	81930;10112;55083	KIF18A;KIF20A;KIF26B	0.661134	0.179711	0.816849
GO:0000785	chromatin	http://amigo.geneontology.org/amigo/term/GO:0000785	5	1196	83	17682	0.89016	1063;824;5347;80335;10769	CENPF;CAPN2;PLK1;WDR82;PLK2	0.662514	0.178805	0.816849
GO:0035098	ESC/E(Z) complex	http://amigo.geneontology.org/amigo/term/GO:0035098	1	1196	16	17682	0.923954	2146	EZH2	0.671474	0.172971	0.818594
GO:0002080	acrosomal membrane	http://amigo.geneontology.org/amigo/term/GO:0002080	1	1196	16	17682	0.923954	5104	SERPINA5	0.671474	0.172971	0.818594
GO:0032982	myosin filament	http://amigo.geneontology.org/amigo/term/GO:0032982	1	1196	16	17682	0.923954	4629	MYH11	0.671474	0.172971	0.818594
GO:0001741	XY body	http://amigo.geneontology.org/amigo/term/GO:0001741	1	1196	16	17682	0.923954	3014	H2AFX	0.671474	0.172971	0.818594
GO:0005776	autophagosome	http://amigo.geneontology.org/amigo/term/GO:0005776	3	1196	52	17682	0.852569	51715;79065;8406	RAB23;ATG9A;SRPX	0.685708	0.163861	0.833606
GO:0031988	membrane-bounded vesicle	http://amigo.geneontology.org/amigo/term/GO:0031988	1	1196	17	17682	0.869555	649	BMP1	0.692306	0.159702	0.839276
GO:0001917	photoreceptor inner segment	http://amigo.geneontology.org/amigo/term/GO:0001917	2	1196	36	17682	0.82105	51109;1759	RDH11;DNM1	0.703428	0.15278	0.846381
GO:0045211	postsynaptic membrane	http://amigo.geneontology.org/amigo/term/GO:0045211	12	1196	201	17682	0.881454	1742;5728;409;79953;1756;2561;115207;1020;23413;9456;55450;57689	DLG4;PTEN;ARRB2;SYNDIG1;DMD;GABRB2;KCTD12;CDK5;NCS1;HOMER1;CAMK2N1;LRRC4C	0.703996	0.15243	0.846381
GO:0031901	early endosome membrane	http://amigo.geneontology.org/amigo/term/GO:0031901	6	1196	104	17682	0.852198	55697;753;79953;55920;58533;387849	VAC14;LDLRAD4;SYNDIG1;RCC2;SNX6;REP15	0.70436	0.152205	0.846381
GO:0005905	coated pit	http://amigo.geneontology.org/amigo/term/GO:0005905	3	1196	54	17682	0.8209	409;11021;4646	ARRB2;RAB35;MYO6	0.708925	0.1494	0.846381
GO:0005813	centrosome	http://amigo.geneontology.org/amigo/term/GO:0005813	25	1196	407	17682	0.906164	22948;4082;9639;1499;348654;51514;29887;9114;994;6790;1021;7128;23564;898;8655;983;64151;2773;5347;7516;5111;10769;2770;9638;26586	CCT5;MARCKS;ARHGEF10;CTNNB1;GEN1;DTL;SNX10;ATP6V0D1;CDC25B;AURKA;CDK6;TNFAIP3;DDAH2;CCNE1;DYNLL1;CDK1;NCAPG;GNAI3;PLK1;XRCC2;PCNA;PLK2;GNAI1;FEZ1;CKAP2	0.710311	0.148552	0.846381
GO:1902711	GABA-A receptor complex	http://amigo.geneontology.org/amigo/term/GO:1902711	1	1196	18	17682	0.821199	2561	GABRB2	0.711818	0.147631	0.846381
GO:0001673	male germ cell nucleus	http://amigo.geneontology.org/amigo/term/GO:0001673	1	1196	18	17682	0.821199	3014	H2AFX	0.711818	0.147631	0.846381
GO:0005730	nucleolus	http://amigo.geneontology.org/amigo/term/GO:0005730	52	1196	826	17682	0.927581	3337;3091;22948;1476;10745;2885;3162;114907;51514;4133;55636;51203;84766;26010;55920;822;140576;50507;7298;5997;55625;10124;55505;3516;7126;5481;6495;22822;7430;8140;3428;387103;51388;1820;56938;2316;4651;56892;467;1508;5347;4609;25;8555;7153;5501;6274;219539;55355;9240;6711;439	DNAJB1;HIF1A;CCT5;CSTB;PHTF1;GRB2;HMOX1;FBXO32;DTL;MAP2;CHD7;NUSAP1;CRACR2A;SPATS2L;RCC2;CAPG;S100A16;NOX4;TYMS;RGS2;ZDHHC7;ARL4A;NOP10;RBPJ;TNFAIP1;PPID;SIX1;PHLDA1;EZR;SLC7A5;IFI16;CENPW;NIP7;ARID3A;ARNTL2;FLNA;MYO10;C8orf4;ATF3;CTSB;PLK1;MYC;ABL1;CDC14B;TOP2A;PPP1CC;S100A3;YPEL4;HJURP;PNMA1;SPTBN1;ASNA1	0.71661	0.144717	0.847084
GO:0033116	endoplasmic reticulum-Golgi intermediate compartment membrane	http://amigo.geneontology.org/amigo/term/GO:0033116	2	1196	37	17682	0.798814	51226;2055	COPZ2;CLN8	0.716979	0.144494	0.847084
GO:0000786	nucleosome	http://amigo.geneontology.org/amigo/term/GO:0000786	5	1196	89	17682	0.829866	3014;8340;8345;8342;94239	H2AFX;HIST1H2BL;HIST1H2BH;HIST1H2BM;H2AFV	0.718265	0.143715	0.847084
GO:0005815	microtubule organizing center	http://amigo.geneontology.org/amigo/term/GO:0005815	7	1196	123	17682	0.840448	81930;5594;26289;10783;9847;54899;998	KIF18A;MAPK1;AK5;NEK6;C2CD5;PXK;CDC42	0.723893	0.140326	0.850314
GO:0000795	synaptonemal complex	http://amigo.geneontology.org/amigo/term/GO:0000795	1	1196	19	17682	0.777934	5347	PLK1	0.730094	0.136621	0.850314
GO:0030660	Golgi-associated vesicle membrane	http://amigo.geneontology.org/amigo/term/GO:0030660	1	1196	19	17682	0.777934	2697	GJA1	0.730094	0.136621	0.850314
GO:0005753	mitochondrial proton-transporting ATP synthase complex	http://amigo.geneontology.org/amigo/term/GO:0005753	1	1196	19	17682	0.777934	514	ATP5E	0.730094	0.136621	0.850314
GO:0042734	presynaptic membrane	http://amigo.geneontology.org/amigo/term/GO:0042734	3	1196	56	17682	0.791492	9627;22859;115207	SNCAIP;ADGRL1;KCTD12	0.7308	0.136202	0.850314
GO:0034361	very-low-density lipoprotein particle	http://amigo.geneontology.org/amigo/term/GO:0034361	1	1196	20	17682	0.738996	341	APOC1	0.747212	0.126556	0.862473
GO:0031674	I band	http://amigo.geneontology.org/amigo/term/GO:0031674	1	1196	20	17682	0.738996	10979	FERMT2	0.747212	0.126556	0.862473
GO:0046658	anchored component of plasma membrane	http://amigo.geneontology.org/amigo/term/GO:0046658	1	1196	20	17682	0.738996	266727	MDGA1	0.747212	0.126556	0.862473
GO:0030133	transport vesicle	http://amigo.geneontology.org/amigo/term/GO:0030133	3	1196	58	17682	0.764112	83716;1359;84079	CRISPLD2;CPA3;ANKRD27	0.75136	0.124152	0.864961
GO:0005694	chromosome	http://amigo.geneontology.org/amigo/term/GO:0005694	4	1196	77	17682	0.767236	157313;51514;51203;25896	CDCA2;DTL;NUSAP1;INTS7	0.762824	0.117576	0.867142
GO:0031430	M band	http://amigo.geneontology.org/amigo/term/GO:0031430	1	1196	21	17682	0.703766	6711	SPTBN1	0.763245	0.117336	0.867142
GO:0034364	high-density lipoprotein particle	http://amigo.geneontology.org/amigo/term/GO:0034364	1	1196	21	17682	0.703766	341	APOC1	0.763245	0.117336	0.867142
GO:0035861	site of double-strand break	http://amigo.geneontology.org/amigo/term/GO:0035861	1	1196	21	17682	0.703766	3014	H2AFX	0.763245	0.117336	0.867142
GO:0030904	retromer complex	http://amigo.geneontology.org/amigo/term/GO:0030904	1	1196	21	17682	0.703766	58533	SNX6	0.763245	0.117336	0.867142
GO:0030176	integral component of endoplasmic reticulum membrane	http://amigo.geneontology.org/amigo/term/GO:0030176	4	1196	78	17682	0.757357	1798;6252;55331;2131	DPAGT1;RTN1;ACER3;EXT1	0.77117	0.11285	0.869433
GO:0005747	mitochondrial respiratory chain complex I	http://amigo.geneontology.org/amigo/term/GO:0005747	2	1196	42	17682	0.703518	55967;4708	NDUFA12;NDUFB2	0.777107	0.109519	0.869433
GO:0045171	intercellular bridge	http://amigo.geneontology.org/amigo/term/GO:0045171	2	1196	42	17682	0.703518	11021;947	RAB35;CD34	0.777107	0.109519	0.869433
GO:0000793	condensed chromosome	http://amigo.geneontology.org/amigo/term/GO:0000793	1	1196	22	17682	0.671738	7153	TOP2A	0.778262	0.108874	0.869433
GO:0035145	exon-exon junction complex	http://amigo.geneontology.org/amigo/term/GO:0035145	1	1196	22	17682	0.671738	9775	EIF4A3	0.778262	0.108874	0.869433
GO:0072372	primary cilium	http://amigo.geneontology.org/amigo/term/GO:0072372	4	1196	79	17682	0.747727	23432;10890;376267;8655	GPR161;RAB10;RAB15;DYNLL1	0.779284	0.108304	0.869433
GO:0000151	ubiquitin ligase complex	http://amigo.geneontology.org/amigo/term/GO:0000151	4	1196	79	17682	0.747727	7334;9477;3301;4008	UBE2N;MED20;DNAJA1;LMO7	0.779284	0.108304	0.869433
GO:0043679	axon terminus	http://amigo.geneontology.org/amigo/term/GO:0043679	2	1196	43	17682	0.687118	9114;6347	ATP6V0D1;CCL2	0.787699	0.10364	0.872766
GO:0001669	acrosomal vesicle	http://amigo.geneontology.org/amigo/term/GO:0001669	3	1196	62	17682	0.714653	23545;29127;4016	ATP6V0A2;RACGAP1;LOXL1	0.788679	0.1031	0.872766
GO:0016607	nuclear speck	http://amigo.geneontology.org/amigo/term/GO:0016607	10	1196	184	17682	0.801837	3091;149628;2334;4000;79228;10783;3428;56892;5501;9775	HIF1A;PYHIN1;AFF2;LMNA;THOC6;NEK6;IFI16;C8orf4;PPP1CC;EIF4A3	0.792157	0.101189	0.872766
GO:0005640	nuclear outer membrane	http://amigo.geneontology.org/amigo/term/GO:0005640	1	1196	23	17682	0.642496	89795	NAV3	0.792327	0.101095	0.872766
GO:0035097	histone methyltransferase complex	http://amigo.geneontology.org/amigo/term/GO:0035097	1	1196	23	17682	0.642496	80335	WDR82	0.792327	0.101095	0.872766
GO:0000421	autophagosome membrane	http://amigo.geneontology.org/amigo/term/GO:0000421	1	1196	24	17682	0.61569	79065	ATG9A	0.805501	0.093934	0.882796
GO:0030667	secretory granule membrane	http://amigo.geneontology.org/amigo/term/GO:0030667	1	1196	24	17682	0.61569	51762	RAB8B	0.805501	0.093934	0.882796
GO:0000407	pre-autophagosomal structure	http://amigo.geneontology.org/amigo/term/GO:0000407	1	1196	25	17682	0.591029	79065	ATG9A	0.817839	0.0873319	0.894061
GO:0031463	Cul3-RING ubiquitin ligase complex	http://amigo.geneontology.org/amigo/term/GO:0031463	1	1196	27	17682	0.547187	7126	TNFAIP1	0.84022	0.075607	0.91622
GO:0015030	Cajal body	http://amigo.geneontology.org/amigo/term/GO:0015030	2	1196	49	17682	0.602776	55505;79607	NOP10;FAM118B	0.842372	0.0744961	0.916264
GO:0005891	voltage-gated calcium channel complex	http://amigo.geneontology.org/amigo/term/GO:0005891	1	1196	30	17682	0.492385	775	CACNA1C	0.868746	0.0611073	0.940239
GO:0016235	aggresome	http://amigo.geneontology.org/amigo/term/GO:0016235	1	1196	30	17682	0.492385	91607	SLFN11	0.868746	0.0611073	0.940239
GO:0072562	blood microparticle	http://amigo.geneontology.org/amigo/term/GO:0072562	6	1196	132	17682	0.670359	713;714;715;5216;51129;1192	C1QB;C1QC;C1R;PFN1;ANGPTL4;CLIC1	0.876893	0.0570535	0.942996
GO:0033017	sarcoplasmic reticulum membrane	http://amigo.geneontology.org/amigo/term/GO:0033017	1	1196	31	17682	0.476475	817	CAMK2D	0.877075	0.0569633	0.942996
GO:0000228	nuclear chromosome	http://amigo.geneontology.org/amigo/term/GO:0000228	2	1196	54	17682	0.546808	3725;7153	JUN;TOP2A	0.877812	0.0565985	0.942996
GO:0009925	basal plasma membrane	http://amigo.geneontology.org/amigo/term/GO:0009925	1	1196	32	17682	0.461559	947	CD34	0.884876	0.0531176	0.948238
GO:0016529	sarcoplasmic reticulum	http://amigo.geneontology.org/amigo/term/GO:0016529	1	1196	33	17682	0.447547	56681	SAR1A	0.892182	0.0495464	0.953712
GO:0000502	proteasome complex	http://amigo.geneontology.org/amigo/term/GO:0000502	2	1196	57	17682	0.517941	5685;5687	PSMA4;PSMA6	0.895387	0.0479892	0.954786
GO:0016592	mediator complex	http://amigo.geneontology.org/amigo/term/GO:0016592	1	1196	35	17682	0.421925	9477	MED20	0.905434	0.043143	0.962442
GO:0043195	terminal bouton	http://amigo.geneontology.org/amigo/term/GO:0043195	2	1196	60	17682	0.49196	886;3611	CCKAR;ILK	0.910585	0.0406795	0.962442
GO:0045111	intermediate filament cytoskeleton	http://amigo.geneontology.org/amigo/term/GO:0045111	2	1196	60	17682	0.49196	5339;90102	PLEC;PHLDB2	0.910585	0.0406795	0.962442
GO:0000788	nuclear nucleosome	http://amigo.geneontology.org/amigo/term/GO:0000788	1	1196	36	17682	0.410181	8340	HIST1H2BL	0.911437	0.0402733	0.962442
GO:0005777	peroxisome	http://amigo.geneontology.org/amigo/term/GO:0005777	4	1196	105	17682	0.561745	55711;8309;847;50640	FAR2;ACOX2;CAT;PNPLA8	0.920636	0.0359119	0.969796
GO:0022627	cytosolic small ribosomal subunit	http://amigo.geneontology.org/amigo/term/GO:0022627	1	1196	40	17682	0.369079	51065	RPS27L	0.931874	0.0306429	0.979257
GO:0000781	chromosome, telomeric region	http://amigo.geneontology.org/amigo/term/GO:0000781	1	1196	41	17682	0.360057	3014	H2AFX	0.936199	0.0286317	0.981426
GO:0042645	mitochondrial nucleoid	http://amigo.geneontology.org/amigo/term/GO:0042645	1	1196	42	17682	0.351464	55379	LRRC59	0.94025	0.0267565	0.983298
GO:0097542	ciliary tip	http://amigo.geneontology.org/amigo/term/GO:0097542	1	1196	43	17682	0.343271	8655	DYNLL1	0.944044	0.0250076	0.983847
GO:0031966	mitochondrial membrane	http://amigo.geneontology.org/amigo/term/GO:0031966	2	1196	70	17682	0.421441	81855;11000	SFXN3;SLC27A3	0.947576	0.0233861	0.983847
GO:0000932	cytoplasmic mRNA processing body	http://amigo.geneontology.org/amigo/term/GO:0000932	2	1196	70	17682	0.421441	5685;5687	PSMA4;PSMA6	0.947576	0.0233861	0.983847
GO:0005814	centriole	http://amigo.geneontology.org/amigo/term/GO:0005814	3	1196	94	17682	0.470511	822;7153;10769	CAPG;TOP2A;PLK2	0.949925	0.0223107	0.983932
GO:0060170	ciliary membrane	http://amigo.geneontology.org/amigo/term/GO:0060170	1	1196	46	17682	0.32083	23432	GPR161	0.954042	0.0204324	0.985844
GO:0005759	mitochondrial matrix	http://amigo.geneontology.org/amigo/term/GO:0005759	11	1196	275	17682	0.587578	2876;54704;4170;5831;7298;9997;514;3418;2746;4200;51022	GPX1;PDP1;MCL1;PYCR1;TYMS;SCO2;ATP5E;IDH2;GLUD1;ME2;GLRX2	0.975779	0.0106486	1
GO:0031514	motile cilium	http://amigo.geneontology.org/amigo/term/GO:0031514	1	1196	58	17682	0.254278	3091	HIF1A	0.979094	0.00917582	1
GO:0005643	nuclear pore	http://amigo.geneontology.org/amigo/term/GO:0005643	1	1196	63	17682	0.234031	3839	KPNA3	0.984945	0.00658803	1
GO:0016605	PML body	http://amigo.geneontology.org/amigo/term/GO:0016605	2	1196	93	17682	0.316799	5728;2000	PTEN;ELF4	0.985364	0.0064035	1
GO:0005743	mitochondrial inner membrane	http://amigo.geneontology.org/amigo/term/GO:0005743	17	1196	410	17682	0.607427	7384;6714;6507;5321;58472;7298;55967;4708;23530;9997;514;8564;4257;90550;3418;27235;23788	UQCRC1;SRC;SLC1A3;PLA2G4A;SQRDL;TYMS;NDUFA12;NDUFB2;NNT;SCO2;ATP5E;KMO;MGST1;MCU;IDH2;COQ2;MTCH2	0.987524	0.00545216	1
GO:0000790	nuclear chromatin	http://amigo.geneontology.org/amigo/term/GO:0000790	4	1196	148	17682	0.39756	3014;2146;860;6688	H2AFX;EZH2;RUNX2;SPI1	0.988696	0.00493704	1
GO:0005758	mitochondrial intermembrane space	http://amigo.geneontology.org/amigo/term/GO:0005758	1	1196	69	17682	0.213607	847	CAT	0.989849	0.00443107	1
GO:0036064	ciliary basal body	http://amigo.geneontology.org/amigo/term/GO:0036064	1	1196	82	17682	0.17961	7430	EZR	0.99568	0.00188006	1
GO:0071013	catalytic step 2 spliceosome	http://amigo.geneontology.org/amigo/term/GO:0071013	1	1196	84	17682	0.175314	9775	EIF4A3	0.996213	0.00164795	1
GO:0005882	intermediate filament	http://amigo.geneontology.org/amigo/term/GO:0005882	1	1196	98	17682	0.150149	4000	LMNA	0.998492	0.000655392	1
GO:0005929	cilium	http://amigo.geneontology.org/amigo/term/GO:0005929	1	1196	108	17682	0.136169	56995	TULP4	0.999219	0.000339217	1
GO:0005654	nucleoplasm	http://amigo.geneontology.org/amigo/term/GO:0005654	133	1196	2604	17682	0.724471	3337;330;3091;2022;80818;5728;2885;1063;57616;1845;55839;157313;2971;1499;22797;51514;5594;7091;51176;10051;1026;23462;23243;10736;7345;3014;8038;55636;196;64077;8013;8340;79822;23493;5476;11270;4170;8345;6474;994;5685;285381;3838;55635;1021;822;4790;120;2146;7298;10112;55589;55625;54843;54796;6446;23327;9477;4000;3516;642;359948;1848;898;11065;8342;50804;79228;11221;84624;5481;84687;9997;595;383…	DNAJB1;BIRC3;HIF1A;ENG;ZNF436;PTEN;GRB2;CENPF;TSHZ3;DUSP3;CENPN;CDCA2;GTF3A;CTNNB1;TFEC;DTL;MAPK1;TLE4;LEF1;SMC4;CDKN1A;HEY1;ANKRD28;SIX2;UCHL1;H2AFX;ADAM12;CHD7;AHR;LHPP;NR4A3;HIST1H2BL;ARHGAP28;HEY2;CTSA;NRM;MCL1;HIST1H2BH;SHOX2;CDC25B;PSMA4;DPH3;KPNA2;DEPDC1;CDK6;CAPG;NFKB1;ADD3;EZH2;TYMS;KIF20A;BMP2K;ZDHHC7;SYTL2;BNC2;SGK1;NEDD4L;MED20;LMNA;RBPJ;BLMH;IRF2BP2;DUSP6;CCNE1;UBE2C;HIST1H2BM;MYEF2;…	0.999828	7.46e-05	1
GO:0005575	cellular_component	http://amigo.geneontology.org/amigo/term/GO:0005575	14	1196	484	17682	0.420865	10184;10220;653121;80270;338773;442213;6273;5157;55092;84191;202;8654;344148;66000	LHFPL2;GDF11;ZBTB8A;HSD3B7;TMEM119;PTCHD4;S100A2;PDGFRL;TMEM51;FAM96A;AIM1;PDE5A;NCKAP5;TMEM108	0.999906	4.09e-05	1
GO:0005634	nucleus	http://amigo.geneontology.org/amigo/term/GO:0005634	261	1196	4984	17682	0.711191	1847;3337;81930;330;9760;3091;10672;7334;1466;8444;5728;3684;7082;2876;10745;867;2885;409;3956;1063;57103;3162;57616;89853;1845;26040;91107;4627;55839;2971;128553;1499;6714;10659;6275;64175;22797;11098;348654;51514;5594;58484;7091;51176;10051;11259;165631;1026;23462;1618;10736;29109;389136;115677;10395;3014;5993;4616;8609;55636;196;64077;8013;8340;4313;29887;4015;23493;81624;1756;51177;26575;1127…	DUSP5;DNAJB1;KIF18A;BIRC3;TOX;HIF1A;GNA13;UBE2N;CSRP2;DYRK3;PTEN;ITGAM;TJP1;GPX1;PHTF1;CBL;GRB2;ARRB2;LGALS1;CENPF;TIGAR;HMOX1;TSHZ3;MVB12B;DUSP3;SETBP1;TRIM47;MYH9;CENPN;GTF3A;TSHZ2;CTNNB1;SRC;CELF2;S100A4;P3H1;TFEC;PRSS23;GEN1;DTL;MAPK1;NLRC4;TLE4;LEF1;SMC4;FILIP1L;PARP15;CDKN1A;HEY1;DAZL;SIX2;FHOD1;VGLL3;NOSTRIN;DLC1;H2AFX;RFX5;GADD45B;KLF7;CHD7;AHR;LHPP;NR4A3;HIST1H2BL;MMP2;SNX10;LOX;HEY2;DIA…	1	2.12e-07	1
