# Supplementary material for: lnc-SAMD14-4 can regulate expression of the COL1A1 and COL1A2 in human chondrocytes
Source: PeerJ. 2019 Sep 2;7:e7491. doi: 10.7717/peerj.7491 (PMC6727836; doi:10.7717/peerj.7491)
Supplement: Table S7 [file peerj-07-7491-s013.xlsx]

## Sheet: Supplementary Table 6
Term_ID	Term_description	Term_url	ListHit	ListTotal	PopHit	PopTotal	FoldEnrichment	Genes	GeneSymbols	P_value	"-log10(pvalue)"	FDR_bh
GO:0005518	collagen binding	http://amigo.geneontology.org/amigo/term/GO:0005518	24	1128	60	16560	5.97826	4318;6678;64175;1513;114897;7373;7092;960;871;84168;8754;9902;22795;22801;131578;1520;1508;5552;9289;127435;4811;4322;5058;5118	MMP9;SPARC;P3H1;CTSK;C1QTNF1;COL14A1;TLL1;CD44;SERPINH1;ANTXR1;ADAM9;MRC2;NID2;ITGA11;LRRC15;CTSS;CTSB;SRGN;ADGRG1;PODN;NID1;MMP13;PAK1;PCOLCE	2.56e-10	9.59106	1.81e-07
GO:0003779	actin binding	http://amigo.geneontology.org/amigo/term/GO:0003779	50	1128	284	16560	2.65816	81930;114793;4627;80206;6275;29109;5339;91010;81624;1756;1636;800;7456;822;7533;120;23406;7171;10486;170954;3936;57496;84687;7430;22885;4628;79789;4645;54443;1072;7454;7168;6711;55740;23022;4646;54899;3688;9645;5216;7170;9535;832;10487;6641;283431;10788;7414;1627;7852	KIF18A;FMNL2;MYH9;FHOD3;S100A4;FHOD1;PLEC;FMNL3;DIAPH3;DMD;ACE;CALD1;WIPF1;CAPG;YWHAH;ADD3;COTL1;TPM4;CAP2;PPP1R18;LCP1;MKL2;PPP1R9B;EZR;ABLIM3;MYH10;CLMN;MYO5B;ANLN;CFL1;WAS;TPM1;SPTBN1;ENAH;PALLD;MYO6;PXK;ITGB1;MICAL2;PFN1;TPM3;GMFG;CAPZB;CAP1;SNTB1;GAS2L3;IQGAP2;VCL;DBN1;CXCR4	1.45e-08	7.83783	5.11e-06
GO:0005509	calcium ion binding	http://amigo.geneontology.org/amigo/term/GO:0005509	86	1128	675	16560	1.94229	4637;79158;867;1002;57190;4323;6695;6678;4325;5097;5099;6275;54947;1012;57575;6586;1003;7058;6281;1000;8404;84766;5321;9353;25780;140576;199;7059;54843;649;7092;7171;4745;84669;57717;4327;4052;30846;7123;3936;64123;23213;23061;79772;23413;79180;10627;6273;64420;715;5168;375790;22795;4038;30008;1004;11328;5957;91860;23158;1462;2200;824;10516;9847;57758;79987;4121;1606;2195;87;6282;57124;4811;4322;…	MYL6;GNPTAB;CBL;CDH4;SEPN1;MMP14;SPOCK1;SPARC;MMP16;PCDH1;PCDH7;S100A4;LPCAT2;CDH13;PCDH10;SLIT3;CDH5;THBS2;S100A10;CDH2;SPARCL1;CRACR2A;PLA2G4A;SLIT2;RASGRP3;S100A16;AIF1;THBS3;SYTL2;BMP1;TLL1;TPM4;NELL1;USP32;PCDHB16;MMP19;LTBP1;EHD2;CLEC3B;LCP1;ADGRL4;SULF1;TBC1D9B;MCTP1;NCS1;EFHD2;MYL12A;S100A2;SUSD1;C1R;ENPP2;AGRN;NID2;LRP4;EFEMP2;CDH6;FKBP9;RCVRN;CALML4;TBC1D9;VCAN;FBN1;CAPN2;FBLN5;C2CD5;SC…	1.39e-07	6.85851	3.25e-05
GO:0051015	actin filament binding	http://amigo.geneontology.org/amigo/term/GO:0051015	27	1128	118	16560	3.41703	4082;4627;10092;8407;8522;4430;7456;199;3936;4643;6876;84168;7430;4629;4628;2316;4651;4646;23603;25;87;832;10788;24145;27;3927;91624	MARCKS;MYH9;ARPC5;TAGLN2;GAS7;MYO1B;WIPF1;AIF1;LCP1;MYO1E;TAGLN;ANTXR1;EZR;MYH11;MYH10;FLNA;MYO10;MYO6;CORO1C;ABL1;ACTN1;CAPZB;IQGAP2;PANX1;ABL2;LASP1;NEXN	4.23e-07	6.3733	7.45e-05
GO:0008201	heparin binding	http://amigo.geneontology.org/amigo/term/GO:0008201	28	1128	148	16560	2.8227	3684;83716;10457;7058;1289;9353;56925;8839;6352;7059;5764;7123;8829;6347;9510;2252;5104;5228;10631;1305;2255;8828;7423;51816;8840;6422;151887;5118	ITGAM;CRISPLD2;GPNMB;THBS2;COL5A1;SLIT2;LXN;WISP2;CCL5;THBS3;PTN;CLEC3B;NRP1;CCL2;ADAMTS1;FGF7;SERPINA5;PGF;POSTN;COL13A1;FGF10;NRP2;VEGFB;CECR1;WISP1;SFRP1;CCDC80;PCOLCE	6.65e-06	5.17724	0.000936184
GO:0004872	receptor activity	http://amigo.geneontology.org/amigo/term/GO:0004872	34	1128	209	16560	2.43142	55697;54209;10159;7099;1240;355;3587;187;10894;9369;4345;118429;2983;56833;23531;2357;1438;3604;950;942;10268;290;4360;10288;54538;3693;23705;8828;5329;3690;8832;22918;60401;51311	VAC14;TREM2;ATP6AP2;TLR4;CMKLR1;FAS;IL10RA;APLNR;LYVE1;NRXN3;CD200;ANTXR2;GUCY1B3;SLAMF8;MMD;FPR1;CSF2RA;TNFRSF9;SCARB2;CD86;RAMP3;ANPEP;MRC1;LILRB2;ROBO4;ITGB5;CADM1;NRP2;PLAUR;ITGB3;CD84;CD93;EDA2R;TLR8	1.3e-05	4.88519	0.0015284
GO:0004222	metalloendopeptidase activity	http://amigo.geneontology.org/amigo/term/GO:0004222	22	1128	106	16560	3.08769	4318;4323;4325;7384;4311;91419;8038;4313;9509;81792;9507;649;7092;4327;2191;56999;9510;1889;8754;8728;170690;4322	MMP9;MMP14;MMP16;UQCRC1;MME;XRCC6BP1;ADAM12;MMP2;ADAMTS2;ADAMTS12;ADAMTS4;BMP1;TLL1;MMP19;FAP;ADAMTS9;ADAMTS1;ECE1;ADAM9;ADAM19;ADAMTS16;MMP13	1.84e-05	4.7344	0.00185385
GO:0005178	integrin binding	http://amigo.geneontology.org/amigo/term/GO:0005178	21	1128	102	16560	3.0609	4323;6714;10457;1289;8839;8482;2191;7070;8754;2200;10516;6423;3611;3688;3479;1903;3791;3693;87;3912;8840	MMP14;SRC;GPNMB;COL5A1;WISP2;SEMA7A;FAP;THY1;ADAM9;FBN1;FBLN5;SFRP2;ILK;ITGB1;IGF1;S1PR3;KDR;ITGB5;ACTN1;LAMB1;WISP1	3.14e-05	4.50276	0.00276515
GO:0005201	extracellular matrix structural constituent	http://amigo.geneontology.org/amigo/term/GO:0005201	14	1128	52	16560	3.98964	1282;1306;1289;7373;1278;1284;255631;1277;30008;3915;2200;284217;3912;3910	COL4A1;COL15A1;COL5A1;COL14A1;COL1A2;COL4A2;COL24A1;COL1A1;EFEMP2;LAMC1;FBN1;LAMA1;LAMB1;LAMA4	5.77e-05	4.23905	0.00451105
GO:0048407	platelet-derived growth factor binding	http://amigo.geneontology.org/amigo/term/GO:0048407	7	1128	11	16560	9.39445	1282;1289;1278;5159;1280;1277;1291	COL4A1;COL5A1;COL1A2;PDGFRB;COL2A1;COL1A1;COL6A1	7.18e-05	4.1438	0.00459603
GO:0043394	proteoglycan binding	http://amigo.geneontology.org/amigo/term/GO:0043394	7	1128	11	16560	9.39445	1289;1513;9353;1520;1508;4811;51816	COL5A1;CTSK;SLIT2;CTSS;CTSB;NID1;CECR1	7.18e-05	4.1438	0.00459603
GO:0005525	GTP binding	http://amigo.geneontology.org/amigo/term/GO:0005525	47	1128	367	16560	1.91837	10672;51715;54974;5880;10890;56681;376267;55303;2775;11021;10124;2983;5874;55752;30846;5911;8934;54622;387;5898;2776;51762;11031;4893;10123;2773;115004;2747;10981;5912;7846;391;1612;58477;84790;998;382;6236;5414;1759;2746;5872;203068;7280;2770;30845;22974	GNA13;RAB23;THG1L;RAC2;RAB10;SAR1A;RAB15;GIMAP4;GNAO1;RAB35;ARL4A;GUCY1B3;RAB27B;SEPT11;EHD2;RAP2A;RAB29;ARL15;RHOA;RALA;GNAQ;RAB8B;RAB31;NRAS;ARL4C;GNAI3;MB21D1;GLUD2;RAB32;RAP2B;TUBA1A;RHOG;DAPK1;SRPRB;TUBA1C;CDC42;ARF6;RRAD;SEPT4;DNM1;GLUD1;RAB13;TUBB;TUBB2A;GNAI1;EHD3;TPX2	8.74e-05	4.05867	0.0051253
GO:0001968	fibronectin binding	http://amigo.geneontology.org/amigo/term/GO:0001968	10	1128	28	16560	5.28111	1513;3486;3685;131578;6423;3688;1520;4322;3690;151887	CTSK;IGFBP3;ITGAV;LRRC15;SFRP2;ITGB1;CTSS;MMP13;ITGB3;CCDC80	9.76e-05	4.0104	0.00528723
GO:0043236	laminin binding	http://amigo.geneontology.org/amigo/term/GO:0043236	9	1128	23	16560	5.78284	3956;1893;8754;375790;131578;3688;1520;3679;4811	LGALS1;ECM1;ADAM9;AGRN;LRRC15;ITGB1;CTSS;ITGA7;NID1	0.000124363	3.90531	0.00605671
GO:0004871	signal transducer activity	http://amigo.geneontology.org/amigo/term/GO:0004871	30	1128	198	16560	2.25782	1499;10672;867;3956;3162;54331;6398;2697;25780;2775;355;3587;3554;2791;1893;3965;10783;1894;10019;2776;2788;6773;2316;3611;2773;5334;8786;5330;10769;2770	CTNNB1;GNA13;CBL;LGALS1;HMOX1;GNG2;SECTM1;GJA1;RASGRP3;GNAO1;FAS;IL10RA;IL1R1;GNG11;ECM1;LGALS9;NEK6;ECT2;SH2B3;GNAQ;GNG7;STAT2;FLNA;ILK;GNAI3;PLCL1;RGS11;PLCB2;PLK2;GNAI1	0.000129049	3.88924	0.00605671
GO:0005096	GTPase activator activity	http://amigo.geneontology.org/amigo/term/GO:0005096	35	1128	252	16560	2.07228	392;9459;83478;93663;10395;79822;9824;26575;1794;25780;1123;55635;9732;57584;5997;58504;7070;55803;57514;23061;397;50807;1894;3071;84079;9462;2776;57522;57186;23158;3725;8786;64744;29127;10788	ARHGAP1;ARHGEF6;ARHGAP24;ARHGAP18;DLC1;ARHGAP28;ARHGAP11A;RGS17;DOCK2;RASGRP3;CHN1;DEPDC1;DOCK4;ARHGAP21;RGS2;ARHGAP22;THY1;ADAP2;ARHGAP31;TBC1D9B;ARHGDIB;ASAP1;ECT2;NCKAP1L;ANKRD27;RASAL2;GNAQ;SRGAP1;RALGAPA2;TBC1D9;JUN;RGS11;SMAP2;RACGAP1;IQGAP2	0.000172485	3.76325	0.00758936
GO:0005515	protein binding	http://amigo.geneontology.org/amigo/term/GO:0005515	637	1128	8463	16560	1.24125	11326;1847;10154;1742;5205;392;3337;285;81930;330;1499;3091;2022;55697;9459;55233;10672;2212;753;4637;4318;80818;7334;22846;1466;51715;79158;5728;3684;23555;22948;115201;526;1381;1282;3455;867;2885;409;2042;3956;2207;57190;54974;54704;3762;1063;57103;4323;54874;90102;3162;57616;83478;79953;6678;114907;26040;4627;54757;374393;9639;9697;58986;128553;80206;5420;6714;10159;5175;7046;26207;6275;23114;…	VSIG4;DUSP5;PLXNC1;DLG4;ATP8B1;ARHGAP1;DNAJB1;ANGPT2;KIF18A;BIRC3;CTNNB1;HIF1A;ENG;VAC14;ARHGEF6;MOB1A;GNA13;FCGR2A;LDLRAD4;MYL6;MMP9;ZNF436;UBE2N;VASH1;CSRP2;RAB23;GNPTAB;PTEN;ITGAM;TSPAN15;CCT5;ATG4A;ATP6V1B2;CRABP1;COL4A1;IFNAR2;CBL;GRB2;ARRB2;EPHA3;LGALS1;FCER1G;SEPN1;THG1L;PDP1;KCNJ5;CENPF;TIGAR;MMP14;FNBP1L;PHLDB2;HMOX1;TSHZ3;ARHGAP24;SYNDIG1;SPARC;FBXO32;SETBP1;MYH9;FAM20A;FAM111B;ARHGEF10…	0.000266139	3.57489	0.0110213
GO:0002020	protease binding	http://amigo.geneontology.org/amigo/term/GO:0002020	17	1128	88	16560	2.86417	1476;3554;2152;7128;9507;3685;2191;1893;5054;940;1803;5104;3688;302;1471;24145;3690	CSTB;IL1R1;F3;TNFAIP3;ADAMTS4;ITGAV;FAP;ECM1;SERPINE1;CD28;DPP4;SERPINA5;ITGB1;ANXA2;CST3;PANX1;ITGB3	0.000334073	3.47616	0.013066
GO:0017124	SH3 domain binding	http://amigo.geneontology.org/amigo/term/GO:0017124	20	1128	116	16560	2.55882	392;2876;867;2885;8038;2697;9732;57514;2530;30011;8754;7454;8728;55740;10656;3611;25;26578;9232;9844	ARHGAP1;GPX1;CBL;GRB2;ADAM12;GJA1;DOCK4;ARHGAP31;FUT8;SH3KBP1;ADAM9;WAS;ADAM19;ENAH;KHDRBS3;ILK;ABL1;OSTF1;PTTG1;ELMO1	0.000390367	3.40853	0.0133558
GO:0046875	ephrin receptor binding	http://amigo.geneontology.org/amigo/term/GO:0046875	9	1128	28	16560	4.74876	867;2885;6714;1123;2534;4916;1020;1947;5294	CBL;GRB2;SRC;CHN1;FYN;NTRK3;CDK5;EFNB1;PIK3CG	0.00041335	3.38368	0.0133558
GO:0017048	Rho GTPase binding	http://amigo.geneontology.org/amigo/term/GO:0017048	9	1128	28	16560	4.74876	114793;91010;81624;1894;2316;5216;139818;55619;10788	FMNL2;FMNL3;DIAPH3;ECT2;FLNA;PFN1;DOCK11;DOCK10;IQGAP2	0.00041335	3.38368	0.0133558
GO:0050431	transforming growth factor beta binding	http://amigo.geneontology.org/amigo/term/GO:0050431	7	1128	16	16560	6.45674	2022;7046;3685;4052;94;948;135228	ENG;TGFBR1;ITGAV;LTBP1;ACVRL1;CD36;CD109	0.000417368	3.37948	0.0133558
GO:0003924	GTPase activity	http://amigo.geneontology.org/amigo/term/GO:0003924	32	1128	248	16560	1.92041	10672;51715;5880;10890;376267;2775;11021;5874;2791;5911;8934;397;387;5898;2776;51762;11031;10123;2773;10981;7846;391;84790;998;382;6236;5414;1759;5872;203068;7280;2770	GNA13;RAB23;RAC2;RAB10;RAB15;GNAO1;RAB35;RAB27B;GNG11;RAP2A;RAB29;ARHGDIB;RHOA;RALA;GNAQ;RAB8B;RAB31;ARL4C;GNAI3;RAB32;TUBA1A;RHOG;TUBA1C;CDC42;ARF6;RRAD;SEPT4;DNM1;RAB13;TUBB;TUBB2A;GNAI1	0.000991249	3.00382	0.0303408
GO:0005516	calmodulin binding	http://amigo.geneontology.org/amigo/term/GO:0005516	25	1128	176	16560	2.10995	4082;4627;775;4133;800;4430;120;5997;4643;4629;4628;7082;4645;817;6711;3783;6546;4651;4646;259266;1612;6236;6641;10788;6547	MARCKS;MYH9;CACNA1C;MAP2;CALD1;MYO1B;ADD3;RGS2;MYO1E;MYH11;MYH10;TJP1;MYO5B;CAMK2D;SPTBN1;KCNN4;SLC8A1;MYO10;MYO6;ASPM;DAPK1;RRAD;SNTB1;IQGAP2;SLC8A3	0.00104379	2.98139	0.0306177
GO:0005546	phosphatidylinositol-4,5-bisphosphate binding	http://amigo.geneontology.org/amigo/term/GO:0005546	10	1128	46	16560	3.21109	5756;4430;11021;54843;55803;50807;3759;9758;5216;302	TWF1;MYO1B;RAB35;SYTL2;ADAP2;ASAP1;KCNJ2;FRMPD4;PFN1;ANXA2	0.00258916	2.58684	0.0729107
GO:0005547	phosphatidylinositol-3,4,5-trisphosphate binding	http://amigo.geneontology.org/amigo/term/GO:0005547	8	1128	32	16560	3.68929	4430;55803;50807;4651;9265;29127;10788;10979	MYO1B;ADAP2;ASAP1;MYO10;CYTH3;RACGAP1;IQGAP2;FERMT2	0.00329123	2.48264	0.0884104
GO:0030898	actin-dependent ATPase activity	http://amigo.geneontology.org/amigo/term/GO:0030898	5	1128	12	16560	6.1398	4637;4627;4430;4628;4651	MYL6;MYH9;MYO1B;MYH10;MYO10	0.00339074	2.46971	0.0884104
GO:0005024	transforming growth factor beta-activated receptor activity	http://amigo.geneontology.org/amigo/term/GO:0005024	4	1128	7	16560	8.41535	2022;7046;4052;94	ENG;TGFBR1;LTBP1;ACVRL1	0.0037784	2.42269	0.0895353
GO:0042277	peptide binding	http://amigo.geneontology.org/amigo/term/GO:0042277	11	1128	58	16560	2.80187	886;4311;1396;5351;5125;51752;290;1508;57140;1200;623	CCKAR;MME;CRIP1;PLOD1;PCSK5;ERAP1;ANPEP;CTSB;RNPEPL1;TPP1;BDKRB1	0.00406484	2.39096	0.0895353
GO:0005102	receptor binding	http://amigo.geneontology.org/amigo/term/GO:0005102	37	1128	331	16560	1.6628	10154;285;409;6357;847;6714;1003;6376;6387;4345;29923;5159;10911;7305;6347;66008;5054;5027;965;1803;8309;51762;942;10673;284217;81029;6404;25;8321;23705;5329;24145;27;9068;5327;944;3910	PLXNC1;ANGPT2;ARRB2;CCL13;CAT;SRC;CDH5;CX3CL1;CXCL12;CD200;HILPDA;PDGFRB;UTS2;TYROBP;CCL2;TRAK2;SERPINE1;P2RX7;CD58;DPP4;ACOX2;RAB8B;CD86;TNFSF13B;LAMA1;WNT5B;SELPLG;ABL1;FZD1;CADM1;PLAUR;PANX1;ABL2;ANGPTL1;PLAT;TNFSF8;LAMA4	0.00410659	2.38652	0.0895353
GO:0019955	cytokine binding	http://amigo.geneontology.org/amigo/term/GO:0019955	6	1128	19	16560	4.6555	3459;8829;1436;972;8828;7852	IFNGR1;NRP1;CSF1R;CD74;NRP2;CXCR4	0.00411482	2.38565	0.0895353
GO:0050840	extracellular matrix binding	http://amigo.geneontology.org/amigo/term/GO:0050840	6	1128	19	16560	4.6555	169611;6678;3685;9289;57124;3690	OLFML2A;SPARC;ITGAV;ADGRG1;CD248;ITGB3	0.00411482	2.38565	0.0895353
GO:0042803	protein homodimerization activity	http://amigo.geneontology.org/amigo/term/GO:0042803	68	1128	705	16560	1.44271	2022;3956;1063;3162;169611;79953;4627;847;1012;58484;10404;5351;64077;8013;6281;4281;56952;4170;9353;7786;713;6793;4668;152007;4790;6352;140576;7298;4345;83483;93166;58533;3625;2191;1889;5027;5341;1894;1436;1803;3656;7511;4038;196527;817;493856;7291;55107;10516;2316;5228;467;4257;2131;4086;87;1435;6282;581;23705;7153;56034;6556;7423;26508;51816;1820;9540	ENG;LGALS1;CENPF;HMOX1;OLFML2A;SYNDIG1;MYH9;CAT;CDH13;NLRC4;CPQ;PLOD1;LHPP;NR4A3;S100A10;MID1;PRTFDC1;MCL1;SLIT2;MAP3K12;C1QB;STK10;NAGA;GLIPR2;NFKB1;CCL5;S100A16;TYMS;CD200;PLVAP;PRDM6;SNX6;INHBB;FAP;ECE1;P2RX7;PLEK;ECT2;CSF1R;DPP4;IRAK2;XPNPEP1;LRP4;ANO6;CAMK2D;CISD2;TWIST1;ANO1;FBLN5;FLNA;PGF;ATF3;MGST1;EXT1;SMAD1;ACTN1;CSF1;S100A11;BAX;CADM1;TOP2A;PDGFC;SLC11A1;VEGFB;HEYL;CECR1;ARID3A;TP53I3	0.00428549	2.368	0.0895353
GO:0032794	GTPase activating protein binding	http://amigo.geneontology.org/amigo/term/GO:0032794	5	1128	13	16560	5.66717	91010;2775;2773;203068;2770	FMNL3;GNAO1;GNAI3;TUBB;GNAI1	0.00445133	2.35151	0.0895353
GO:0017017	MAP kinase tyrosine/serine/threonine phosphatase activity	http://amigo.geneontology.org/amigo/term/GO:0017017	5	1128	13	16560	5.66717	1847;1848;11221;1843;1846	DUSP5;DUSP6;DUSP10;DUSP1;DUSP4	0.00445133	2.35151	0.0895353
GO:0004725	protein tyrosine phosphatase activity	http://amigo.geneontology.org/amigo/term/GO:0004725	14	1128	88	16560	2.35237	1847;5728;1845;5793;5803;994;1033;1848;11221;5796;201562;8555;1846;5788	DUSP5;PTEN;DUSP3;PTPRG;PTPRZ1;CDC25B;CDKN3;DUSP6;DUSP10;PTPRK;HACD2;CDC14B;DUSP4;PTPRC	0.00524388	2.28035	0.102547
GO:0019904	protein domain specific binding	http://amigo.geneontology.org/amigo/term/GO:0019904	25	1128	202	16560	1.83545	409;4627;23114;775;100506658;55920;822;7533;5874;30846;7126;8655;860;7430;7082;3553;7291;3399;3920;7027;2773;5912;7846;5329;203068	ARRB2;MYH9;NFASC;CACNA1C;OCLN;RCC2;CAPG;YWHAH;RAB27B;EHD2;TNFAIP1;DYNLL1;RUNX2;EZR;TJP1;IL1B;TWIST1;ID3;LAMP2;TFDP1;GNAI3;RAP2B;TUBA1A;PLAUR;TUBB	0.00543204	2.26504	0.103355
GO:0042813	Wnt-activated receptor activity	http://amigo.geneontology.org/amigo/term/GO:0042813	6	1128	21	16560	4.21161	8324;6424;4038;6423;8321;6422	FZD7;SFRP4;LRP4;SFRP2;FZD1;SFRP1	0.00616745	2.20989	0.11426
GO:0044325	ion channel binding	http://amigo.geneontology.org/amigo/term/GO:0044325	15	1128	100	16560	2.21833	1499;6714;1003;10060;6281;7533;23327;2534;7881;817;6546;29085;9456;87;24145	CTNNB1;SRC;CDH5;ABCC9;S100A10;YWHAH;NEDD4L;FYN;KCNAB1;CAMK2D;SLC8A1;PHPT1;HOMER1;ACTN1;PANX1	0.00635819	2.19667	0.114774
GO:0017147	Wnt-protein binding	http://amigo.geneontology.org/amigo/term/GO:0017147	7	1128	29	16560	3.55954	8324;6424;4038;4919;6423;8321;6422	FZD7;SFRP4;LRP4;ROR1;SFRP2;FZD1;SFRP1	0.00688101	2.16235	0.121106
GO:0005161	platelet-derived growth factor receptor binding	http://amigo.geneontology.org/amigo/term/GO:0005161	5	1128	15	16560	4.91095	5728;3554;5159;56034;3690	PTEN;IL1R1;PDGFRB;PDGFC;ITGB3	0.00724294	2.14009	0.121712
GO:0002162	dystroglycan binding	http://amigo.geneontology.org/amigo/term/GO:0002162	4	1128	9	16560	6.54448	4133;1756;375790;7414	MAP2;DMD;AGRN;VCL	0.00738863	2.13144	0.121712
GO:0005540	hyaluronic acid binding	http://amigo.geneontology.org/amigo/term/GO:0005540	6	1128	22	16560	4.01993	10894;960;23166;1462;145864;7130	LYVE1;CD44;STAB1;VCAN;HAPLN3;TNFAIP6	0.00743409	2.12877	0.121712
GO:0003785	actin monomer binding	http://amigo.geneontology.org/amigo/term/GO:0003785	6	1128	23	16560	3.84492	5756;7114;5216;25;9168;27	TWF1;TMSB4X;PFN1;ABL1;TMSB10;ABL2	0.00887811	2.05168	0.140003
GO:0042802	identical protein binding	http://amigo.geneontology.org/amigo/term/GO:0042802	55	1128	568	16560	1.44317	4318;5728;118788;2885;54974;6275;58484;1618;5793;29109;9627;6993;4281;29899;9353;355;3939;6793;5831;4790;1278;283349;1280;90550;3936;7305;4684;10403;940;1277;3759;6273;3428;1803;972;7454;64841;6773;467;9456;114904;4086;1612;4615;9076;581;998;5111;5211;1471;1759;2746;55355;3690;6422	MMP9;PTEN;PIK3AP1;GRB2;THG1L;S100A4;NLRC4;DAZL;PTPRG;FHOD1;SNCAIP;DYNLT1;MID1;GPSM2;SLIT2;FAS;LDHA;STK10;PYCR1;NFKB1;COL1A2;RASSF3;COL2A1;MCU;LCP1;TYROBP;NCAM1;NDC80;CD28;COL1A1;KCNJ2;S100A2;IFI16;DPP4;CD74;WAS;GNPNAT1;STAT2;ATF3;HOMER1;C1QTNF6;SMAD1;DAPK1;MYD88;CLDN1;BAX;CDC42;PCNA;PFKL;CST3;DNM1;GLUD1;HJURP;ITGB3;SFRP1	0.00894908	2.04822	0.140003
GO:0004869	cysteine-type endopeptidase inhibitor activity	http://amigo.geneontology.org/amigo/term/GO:0004869	7	1128	32	16560	3.22525	1476;6695;58484;1470;1471;114769;9232	CSTB;SPOCK1;NLRC4;CST2;CST3;CARD16;PTTG1	0.0107419	1.96892	0.151789
GO:0008083	growth factor activity	http://amigo.geneontology.org/amigo/term/GO:0008083	20	1128	160	16560	1.85018	10220;2896;6387;649;5764;2256;3625;656;7424;2252;3569;5228;353500;3479;9535;1435;2255;56034;7423;51816	GDF11;GRN;CXCL12;BMP1;PTN;FGF11;INHBB;BMP8B;VEGFC;FGF7;IL6;PGF;BMP8A;IGF1;GMFG;CSF1;FGF10;PDGFC;VEGFB;CECR1	0.0109615	1.96013	0.151789
GO:0005001	transmembrane receptor protein tyrosine phosphatase activity	http://amigo.geneontology.org/amigo/term/GO:0005001	5	1128	17	16560	4.33267	5793;5803;5787;5796;5788	PTPRG;PTPRZ1;PTPRB;PTPRK;PTPRC	0.0110669	1.95597	0.151789
GO:0043395	heparan sulfate proteoglycan binding	http://amigo.geneontology.org/amigo/term/GO:0043395	5	1128	17	16560	4.33267	3684;9353;9037;375790;2239	ITGAM;SLIT2;SEMA5A;AGRN;GPC4	0.0110669	1.95597	0.151789
GO:0008237	metallopeptidase activity	http://amigo.geneontology.org/amigo/term/GO:0008237	11	1128	68	16560	2.38838	4318;8038;4313;1636;9509;9507;649;56999;9510;8754;290	MMP9;ADAM12;MMP2;ACE;ADAMTS2;ADAMTS4;BMP1;ADAMTS9;ADAMTS1;ADAM9;ANPEP	0.0113106	1.94651	0.151789
GO:0000988	transcription factor activity, protein binding	http://amigo.geneontology.org/amigo/term/GO:0000988	3	1128	5	16560	8.82933	23493;26508;23462	HEY2;HEYL;HEY1	0.011365	1.94443	0.151789
GO:0001875	lipopolysaccharide receptor activity	http://amigo.geneontology.org/amigo/term/GO:0001875	3	1128	5	16560	8.82933	7099;23643;5724	TLR4;LY96;PTAFR	0.011365	1.94443	0.151789
GO:0004672	protein kinase activity	http://amigo.geneontology.org/amigo/term/GO:0004672	23	1128	194	16560	1.75593	8444;9201;6714;7046;6790;7786;6352;9262;595;1020;6347;28951;3984;983;23531;79834;54899;5347;1612;25;5294;27;5058	DYRK3;DCLK1;SRC;TGFBR1;AURKA;MAP3K12;CCL5;STK17B;CCND1;CDK5;CCL2;TRIB2;LIMK1;CDK1;MMD;PEAK1;PXK;PLK1;DAPK1;ABL1;PIK3CG;ABL2;PAK1	0.0115673	1.93677	0.151789
GO:0008307	structural constituent of muscle	http://amigo.geneontology.org/amigo/term/GO:0008307	8	1128	41	16560	2.87787	4637;5339;1756;7171;4629;7168;91624;10398	MYL6;PLEC;DMD;TPM4;MYH11;TPM1;NEXN;MYL9	0.0116429	1.93394	0.151789
GO:0042056	chemoattractant activity	http://amigo.geneontology.org/amigo/term/GO:0042056	6	1128	25	16560	3.5369	6387;6352;7424;2252;2255;7423	CXCL12;CCL5;VEGFC;FGF7;FGF10;VEGFB	0.0123483	1.90839	0.155382
GO:0008134	transcription factor binding	http://amigo.geneontology.org/amigo/term/GO:0008134	30	1128	276	16560	1.61202	1499;3091;79158;1063;5594;51176;10736;196;23493;4790;323;595;3516;1810;28951;3428;5168;9935;2353;947;2354;7291;3399;2316;7027;3725;4609;5481;26508;23462	CTNNB1;HIF1A;GNPTAB;CENPF;MAPK1;LEF1;SIX2;AHR;HEY2;NFKB1;APBB2;CCND1;RBPJ;DR1;TRIB2;IFI16;ENPP2;MAFB;FOS;CD34;FOSB;TWIST1;ID3;FLNA;TFDP1;JUN;MYC;PPID;HEYL;HEY1	0.0127194	1.89553	0.155382
GO:0017154	semaphorin receptor activity	http://amigo.geneontology.org/amigo/term/GO:0017154	4	1128	11	16560	5.35393	10154;8829;5362;8828	PLXNC1;NRP1;PLXNA2;NRP2	0.0127373	1.89492	0.155382
GO:0019901	protein kinase binding	http://amigo.geneontology.org/amigo/term/GO:0019901	37	1128	359	16560	1.53047	59;3091;5728;3455;2885;1845;8013;1000;994;6790;7786;55920;10112;595;5159;898;1020;94;161;7070;2305;23413;10783;7454;5796;3611;5347;55450;4086;23645;890;29127;998;5501;1759;5788;22974	ACTA2;HIF1A;PTEN;IFNAR2;GRB2;DUSP3;NR4A3;CDH2;CDC25B;AURKA;MAP3K12;RCC2;KIF20A;CCND1;PDGFRB;CCNE1;CDK5;ACVRL1;AP2A2;THY1;FOXM1;NCS1;NEK6;WAS;PTPRK;ILK;PLK1;CAMK2N1;SMAD1;PPP1R15A;CCNA2;RACGAP1;CDC42;PPP1CC;DNM1;PTPRC;TPX2	0.0128014	1.89274	0.155382
GO:0008138	protein tyrosine/serine/threonine phosphatase activity	http://amigo.geneontology.org/amigo/term/GO:0008138	8	1128	42	16560	2.80918	1847;5728;1845;1033;11221;1843;8555;1846	DUSP5;PTEN;DUSP3;CDKN3;DUSP10;DUSP1;CDC14B;DUSP4	0.0131077	1.88247	0.156404
GO:0015026	coreceptor activity	http://amigo.geneontology.org/amigo/term/GO:0015026	6	1128	26	16560	3.40066	8829;940;23643;942;10268;7852	NRP1;CD28;LY96;CD86;RAMP3;CXCR4	0.0143985	1.84168	0.168943
GO:0000146	microfilament motor activity	http://amigo.geneontology.org/amigo/term/GO:0000146	5	1128	19	16560	3.87613	4627;4430;4643;4628;4645	MYH9;MYO1B;MYO1E;MYH10;MYO5B	0.0160751	1.79385	0.178726
GO:0019864	IgG binding	http://amigo.geneontology.org/amigo/term/GO:0019864	4	1128	12	16560	4.90747	2212;2207;2215;9103	FCGR2A;FCER1G;FCGR3B;FCGR2C	0.0161415	1.79206	0.178726
GO:0015075	ion transmembrane transporter activity	http://amigo.geneontology.org/amigo/term/GO:0015075	4	1128	12	16560	4.90747	81855;2697;51393;3927	SFXN3;GJA1;TRPV2;LASP1	0.0161415	1.79206	0.178726
GO:0030020	extracellular matrix structural constituent conferring tensile strength	http://amigo.geneontology.org/amigo/term/GO:0030020	3	1128	6	16560	7.35733	1303;1297;1280	COL12A1;COL9A1;COL2A1	0.0162478	1.78921	0.178726
GO:0008234	cysteine-type peptidase activity	http://amigo.geneontology.org/amigo/term/GO:0008234	7	1128	36	16560	2.86619	115201;1513;79868;642;1522;824;1508	ATG4A;CTSK;ALG13;BLMH;CTSZ;CAPN2;CTSB	0.0180608	1.74326	0.195612
GO:0017022	myosin binding	http://amigo.geneontology.org/amigo/term/GO:0017022	5	1128	20	16560	3.6821	1756;800;387;5898;55243	DMD;CALD1;RHOA;RALA;KIRREL	0.0190652	1.71976	0.20159
GO:0004435	phosphatidylinositol phospholipase C activity	http://amigo.geneontology.org/amigo/term/GO:0004435	6	1128	28	16560	3.15737	6352;719;5334;1230;5330;1909	CCL5;C3AR1;PLCL1;CCR1;PLCB2;EDNRA	0.0191854	1.71703	0.20159
GO:0016757	transferase activity, transferring glycosyl groups	http://amigo.geneontology.org/amigo/term/GO:0016757	4	1128	13	16560	4.5297	55830;1798;79712;2131	GLT8D1;DPAGT1;GTDC1;EXT1	0.0200648	1.69757	0.207421
GO:0005044	scavenger receptor activity	http://amigo.geneontology.org/amigo/term/GO:0005044	8	1128	46	16560	2.56429	3426;4481;56241;23166;5168;9332;8685;58191	CFI;MSR1;SUSD2;STAB1;ENPP2;CD163;MARCO;CXCL16	0.0203296	1.69187	0.207421
GO:0005501	retinoid binding	http://amigo.geneontology.org/amigo/term/GO:0005501	3	1128	7	16560	6.3059	1381;5730;1382	CRABP1;PTGDS;CRABP2	0.0221263	1.65509	0.216008
GO:0043208	glycosphingolipid binding	http://amigo.geneontology.org/amigo/term/GO:0043208	3	1128	7	16560	6.3059	3915;284217;3912	LAMC1;LAMA1;LAMB1	0.0221263	1.65509	0.216008
GO:0005021	vascular endothelial growth factor-activated receptor activity	http://amigo.geneontology.org/amigo/term/GO:0005021	3	1128	7	16560	6.3059	8829;3791;8828	NRP1;KDR;NRP2	0.0221263	1.65509	0.216008
GO:0031683	G-protein beta/gamma-subunit complex binding	http://amigo.geneontology.org/amigo/term/GO:0031683	5	1128	21	16560	3.50655	10672;2775;2776;2773;2770	GNA13;GNAO1;GNAQ;GNAI3;GNAI1	0.0223985	1.64978	0.216008
GO:0005057	receptor signaling protein activity	http://amigo.geneontology.org/amigo/term/GO:0005057	7	1128	38	16560	2.71501	9201;7046;55816;7305;3566;9046;4086	DCLK1;TGFBR1;DOK5;TYROBP;IL4R;DOK2;SMAD1	0.0227949	1.64216	0.21686
GO:0050839	cell adhesion molecule binding	http://amigo.geneontology.org/amigo/term/GO:0050839	9	1128	57	16560	2.32863	22859;9369;4345;7430;3688;10288;23705;10631;3690	ADGRL1;NRXN3;CD200;EZR;ITGB1;LILRB2;CADM1;POSTN;ITGB3	0.0236281	1.62657	0.221789
GO:0050998	nitric-oxide synthase binding	http://amigo.geneontology.org/amigo/term/GO:0050998	4	1128	14	16560	4.2059	1000;1756;972;817	CDH2;DMD;CD74;CAMK2D	0.0245258	1.61038	0.227186
GO:0046961	proton-transporting ATPase activity, rotational mechanism	http://amigo.geneontology.org/amigo/term/GO:0046961	5	1128	22	16560	3.34696	526;514;23545;10312;523	ATP6V1B2;ATP5E;ATP6V0A2;TCIRG1;ATP6V1A	0.0260874	1.58357	0.238513
GO:0035091	phosphatidylinositol binding	http://amigo.geneontology.org/amigo/term/GO:0035091	10	1128	69	16560	2.13775	9644;51375;58533;4643;221749;5287;401548;54899;79856;56995	SH3PXD2A;SNX7;SNX6;MYO1E;PXDC1;PIK3C2B;SNX30;PXK;SNX22;TULP4	0.0281753	1.55013	0.248506
GO:0016538	cyclin-dependent protein serine/threonine kinase regulator activity	http://amigo.geneontology.org/amigo/term/GO:0016538	3	1128	8	16560	5.51733	1164;595;898	CKS2;CCND1;CCNE1	0.0290067	1.5375	0.248506
GO:0004702	receptor signaling protein serine/threonine kinase activity	http://amigo.geneontology.org/amigo/term/GO:0004702	4	1128	15	16560	3.92527	7046;9943;94;658	TGFBR1;OXSR1;ACVRL1;BMPR1B	0.0295384	1.52961	0.248506
GO:0004180	carboxypeptidase activity	http://amigo.geneontology.org/amigo/term/GO:0004180	4	1128	15	16560	3.92527	10404;1636;5476;642	CPQ;ACE;CTSA;BLMH	0.0295384	1.52961	0.248506
GO:0030169	low-density lipoprotein particle binding	http://amigo.geneontology.org/amigo/term/GO:0030169	4	1128	15	16560	3.92527	1012;4481;23166;948	CDH13;MSR1;STAB1;CD36	0.0295384	1.52961	0.248506
GO:0070006	metalloaminopeptidase activity	http://amigo.geneontology.org/amigo/term/GO:0070006	4	1128	15	16560	3.92527	51752;7511;290;57140	ERAP1;XPNPEP1;ANPEP;RNPEPL1	0.0295384	1.52961	0.248506
GO:0019003	GDP binding	http://amigo.geneontology.org/amigo/term/GO:0019003	8	1128	50	16560	2.35857	10890;11021;5874;5898;51762;11031;5912;2770	RAB10;RAB35;RAB27B;RALA;RAB8B;RAB31;RAP2B;GNAI1	0.0300043	1.52282	0.248506
GO:0005080	protein kinase C binding	http://amigo.geneontology.org/amigo/term/GO:0005080	8	1128	50	16560	2.35857	4082;120;3685;5341;8754;2316;7153;9638	MARCKS;ADD3;ITGAV;PLEK;ADAM9;FLNA;TOP2A;FEZ1	0.0300043	1.52282	0.248506
GO:0051879	Hsp90 protein binding	http://amigo.geneontology.org/amigo/term/GO:0051879	5	1128	24	16560	3.06768	3091;196;2983;3791;5481	HIF1A;AHR;GUCY1B3;KDR;PPID	0.0345726	1.46127	0.271806
GO:0048365	Rac GTPase binding	http://amigo.geneontology.org/amigo/term/GO:0048365	7	1128	42	16560	2.45584	55920;9732;57522;2316;23603;10788;5058	RCC2;DOCK4;SRGAP1;FLNA;CORO1C;IQGAP2;PAK1	0.0346911	1.45978	0.271806
GO:0001784	phosphotyrosine binding	http://amigo.geneontology.org/amigo/term/GO:0001784	4	1128	16	16560	3.67972	867;2885;5594;64092	CBL;GRB2;MAPK1;SAMSN1	0.0351123	1.45454	0.271806
GO:0023026	MHC class II protein complex binding	http://amigo.geneontology.org/amigo/term/GO:0023026	4	1128	16	16560	3.67972	3109;3122;972;3108	HLA-DMB;HLA-DRA;CD74;HLA-DMA	0.0351123	1.45454	0.271806
GO:0005504	fatty acid binding	http://amigo.geneontology.org/amigo/term/GO:0005504	4	1128	16	16560	3.67972	8309;5730;341;2171	ACOX2;PTGDS;APOC1;FABP5	0.0351123	1.45454	0.271806
GO:0004197	cysteine-type endopeptidase activity	http://amigo.geneontology.org/amigo/term/GO:0004197	12	1128	93	16560	1.90392	115201;7345;1513;84669;642;373856;5641;1522;1520;1508;834;6422	ATG4A;UCHL1;CTSK;USP32;BLMH;USP41;LGMN;CTSZ;CTSS;CTSB;CASP1;SFRP1	0.035134	1.45427	0.271806
GO:0004175	endopeptidase activity	http://amigo.geneontology.org/amigo/term/GO:0004175	9	1128	62	16560	2.14019	4318;4311;1636;5685;2191;1889;5687;834;1200	MMP9;MME;ACE;PSMA4;FAP;ECE1;PSMA6;CASP1;TPP1	0.035938	1.44445	0.273307
GO:0031681	G-protein beta-subunit binding	http://amigo.geneontology.org/amigo/term/GO:0031681	3	1128	9	16560	4.904	22948;54331;8786	CCT5;GNG2;RGS11	0.036881	1.4332	0.273307
GO:0005031	tumor necrosis factor-activated receptor activity	http://amigo.geneontology.org/amigo/term/GO:0005031	3	1128	9	16560	4.904	7132;55504;60401	TNFRSF1A;TNFRSF19;EDA2R	0.036881	1.4332	0.273307
GO:0031994	insulin-like growth factor I binding	http://amigo.geneontology.org/amigo/term/GO:0031994	3	1128	9	16560	4.904	3486;3487;3685	IGFBP3;IGFBP4;ITGAV	0.036881	1.4332	0.273307
GO:0032403	protein complex binding	http://amigo.geneontology.org/amigo/term/GO:0032403	21	1128	200	16560	1.55176	1742;409;7384;64175;1026;10736;1000;9114;54442;822;595;898;161;3071;10019;2200;4893;4609;581;203068;10769	DLG4;ARRB2;UQCRC1;P3H1;CDKN1A;SIX2;CDH2;ATP6V0D1;KCTD5;CAPG;CCND1;CCNE1;AP2A2;NCKAP1L;SH2B3;FBN1;NRAS;MYC;BAX;TUBB;PLK2	0.0439267	1.35727	0.320019
GO:0008233	peptidase activity	http://amigo.geneontology.org/amigo/term/GO:0008233	9	1128	65	16560	2.04104	9507;649;2191;5641;5125;23621;1508;51029;1200	ADAMTS4;BMP1;FAP;LGMN;PCSK5;BACE1;CTSB;DESI2;TPP1	0.0451253	1.34558	0.320019
GO:0045294	alpha-catenin binding	http://amigo.geneontology.org/amigo/term/GO:0045294	3	1128	10	16560	4.41333	1499;1000;7414	CTNNB1;CDH2;VCL	0.0457287	1.33981	0.320019
GO:0005041	low-density lipoprotein receptor activity	http://amigo.geneontology.org/amigo/term/GO:0005041	3	1128	10	16560	4.41333	23166;948;58191	STAB1;CD36;CXCL16	0.0457287	1.33981	0.320019
GO:0030215	semaphorin receptor binding	http://amigo.geneontology.org/amigo/term/GO:0030215	3	1128	10	16560	4.41333	9037;10512;80031	SEMA5A;SEMA3C;SEMA6D	0.0457287	1.33981	0.320019
GO:0003774	motor activity	http://amigo.geneontology.org/amigo/term/GO:0003774	7	1128	45	16560	2.2917	4637;4627;6993;4643;8655;4629;4646	MYL6;MYH9;DYNLT1;MYO1E;DYNLL1;MYH11;MYO6	0.0459118	1.33808	0.320019
GO:0004674	protein serine/threonine kinase activity	http://amigo.geneontology.org/amigo/term/GO:0004674	31	1128	325	16560	1.41164	8444;9201;54757;7046;5594;30811;9943;6790;7786;6793;9262;55589;6446;1020;94;11329;3984;10783;658;983;3656;817;3611;5347;1612;7272;166614;5294;10769;9448;5058	DYRK3;DCLK1;FAM20A;TGFBR1;MAPK1;HUNK;OXSR1;AURKA;MAP3K12;STK10;STK17B;BMP2K;SGK1;CDK5;ACVRL1;STK38;LIMK1;NEK6;BMPR1B;CDK1;IRAK2;CAMK2D;ILK;PLK1;DAPK1;TTK;DCLK2;PIK3CG;PLK2;MAP4K4;PAK1	0.0485426	1.31388	0.335039
GO:0004177	aminopeptidase activity	http://amigo.geneontology.org/amigo/term/GO:0004177	5	1128	27	16560	2.72633	642;51752;7511;290;51056	BLMH;ERAP1;XPNPEP1;ANPEP;LAP3	0.0501738	1.29952	0.342936
GO:0008092	cytoskeletal protein binding	http://amigo.geneontology.org/amigo/term/GO:0008092	7	1128	47	16560	2.19392	257019;2170;1020;7168;824;6546;302	FRMD3;FABP3;CDK5;TPM1;CAPN2;SLC8A1;ANXA2	0.0545481	1.26322	0.361905
GO:0005520	insulin-like growth factor binding	http://amigo.geneontology.org/amigo/term/GO:0005520	4	1128	19	16560	3.09815	8839;3486;3490;8840	WISP2;IGFBP3;IGFBP7;WISP1	0.0552335	1.2578	0.361905
GO:0070411	I-SMAD binding	http://amigo.geneontology.org/amigo/term/GO:0070411	3	1128	11	16560	4.01188	1499;7046;4086	CTNNB1;TGFBR1;SMAD1	0.0555195	1.25555	0.361905
GO:0000983	transcription factor activity, RNA polymerase II core promoter sequence-specific	http://amigo.geneontology.org/amigo/term/GO:0000983	3	1128	11	16560	4.01188	23493;26508;23462	HEY2;HEYL;HEY1	0.0555195	1.25555	0.361905
GO:0004033	aldo-keto reductase (NADP) activity	http://amigo.geneontology.org/amigo/term/GO:0004033	3	1128	11	16560	4.01188	7881;8644;1528	KCNAB1;AKR1C3;CYB5A	0.0555195	1.25555	0.361905
GO:0005125	cytokine activity	http://amigo.geneontology.org/amigo/term/GO:0005125	18	1128	172	16560	1.54507	10220;9235;2896;6398;123920;649;3625;656;3553;8600;10673;3569;353500;3606;1435;54918;27190;944	GDF11;IL32;GRN;SECTM1;CMTM3;BMP1;INHBB;BMP8B;IL1B;TNFSF11;TNFSF13B;IL6;BMP8A;IL18;CSF1;CMTM6;IL17B;TNFSF8	0.0601326	1.22089	0.388379
GO:0001530	lipopolysaccharide binding	http://amigo.geneontology.org/amigo/term/GO:0001530	4	1128	20	16560	2.94306	54209;7099;5027;5724	TREM2;TLR4;P2RX7;PTAFR	0.0630652	1.20021	0.396614
GO:0005089	Rho guanyl-nucleotide exchange factor activity	http://amigo.geneontology.org/amigo/term/GO:0005089	9	1128	70	16560	1.89468	55160;9459;9639;57480;89846;115557;1894;139818;55619	ARHGEF10L;ARHGEF6;ARHGEF10;PLEKHG1;FGD3;ARHGEF25;ECT2;DOCK11;DOCK10	0.0636809	1.19599	0.396614
GO:0045295	gamma-catenin binding	http://amigo.geneontology.org/amigo/term/GO:0045295	3	1128	12	16560	3.67733	51176;1000;5796	LEF1;CDH2;PTPRK	0.0662151	1.17904	0.396614
GO:0071813	lipoprotein particle binding	http://amigo.geneontology.org/amigo/term/GO:0071813	2	1128	5	16560	5.88099	1012;948	CDH13;CD36	0.0688664	1.16199	0.396614
GO:0097109	neuroligin family protein binding	http://amigo.geneontology.org/amigo/term/GO:0097109	2	1128	5	16560	5.88099	1742;9369	DLG4;NRXN3	0.0688664	1.16199	0.396614
GO:0005432	calcium:sodium antiporter activity	http://amigo.geneontology.org/amigo/term/GO:0005432	2	1128	5	16560	5.88099	6546;6547	SLC8A1;SLC8A3	0.0688664	1.16199	0.396614
GO:0005111	type 2 fibroblast growth factor receptor binding	http://amigo.geneontology.org/amigo/term/GO:0005111	2	1128	5	16560	5.88099	2252;2255	FGF7;FGF10	0.0688664	1.16199	0.396614
GO:0098639	collagen binding involved in cell-matrix adhesion	http://amigo.geneontology.org/amigo/term/GO:0098639	2	1128	5	16560	5.88099	22801;3688	ITGA11;ITGB1	0.0688664	1.16199	0.396614
GO:0004185	serine-type carboxypeptidase activity	http://amigo.geneontology.org/amigo/term/GO:0004185	2	1128	5	16560	5.88099	5476;5547	CTSA;PRCP	0.0688664	1.16199	0.396614
GO:0045545	syndecan binding	http://amigo.geneontology.org/amigo/term/GO:0045545	2	1128	5	16560	5.88099	3371;9037	TNC;SEMA5A	0.0688664	1.16199	0.396614
GO:0019863	IgE binding	http://amigo.geneontology.org/amigo/term/GO:0019863	2	1128	5	16560	5.88099	2207;2205	FCER1G;FCER1A	0.0688664	1.16199	0.396614
GO:0019871	sodium channel inhibitor activity	http://amigo.geneontology.org/amigo/term/GO:0019871	2	1128	5	16560	5.88099	23327;817	NEDD4L;CAMK2D	0.0688664	1.16199	0.396614
GO:0015187	glycine transmembrane transporter activity	http://amigo.geneontology.org/amigo/term/GO:0015187	2	1128	5	16560	5.88099	206358;92745	SLC36A1;SLC38A5	0.0688664	1.16199	0.396614
GO:0043531	ADP binding	http://amigo.geneontology.org/amigo/term/GO:0043531	5	1128	30	16560	2.45325	4627;4628;4646;2747;2746	MYH9;MYH10;MYO6;GLUD2;GLUD1	0.0692948	1.1593	0.396614
GO:0070412	R-SMAD binding	http://amigo.geneontology.org/amigo/term/GO:0070412	4	1128	21	16560	2.80275	1499;753;2353;3725	CTNNB1;LDLRAD4;FOS;JUN	0.0714461	1.14602	0.40563
GO:0044548	S100 protein binding	http://amigo.geneontology.org/amigo/term/GO:0044548	3	1128	13	16560	3.39426	7430;6282;302	EZR;S100A11;ANXA2	0.0777705	1.10919	0.438003
GO:0019903	protein phosphatase binding	http://amigo.geneontology.org/amigo/term/GO:0019903	8	1128	63	16560	1.87041	1742;1499;2885;1003;1000;1436;1462;3783	DLG4;CTNNB1;GRB2;CDH5;CDH2;CSF1R;VCAN;KCNN4	0.0816466	1.08806	0.456184
GO:0001618	virus receptor activity	http://amigo.geneontology.org/amigo/term/GO:0001618	5	1128	32	16560	2.29964	3685;1803;290;3688;7852	ITGAV;DPP4;ANPEP;ITGB1;CXCR4	0.08398	1.07582	0.456516
GO:0004721	phosphoprotein phosphatase activity	http://amigo.geneontology.org/amigo/term/GO:0004721	5	1128	32	16560	2.29964	5728;11221;29085;9989;5501	PTEN;DUSP10;PHPT1;PPP4R1;PPP1CC	0.08398	1.07582	0.456516
GO:0070491	repressing transcription factor binding	http://amigo.geneontology.org/amigo/term/GO:0070491	5	1128	32	16560	2.29964	1499;7091;860;51053;4609	CTNNB1;TLE4;RUNX2;GMNN;MYC	0.08398	1.07582	0.456516
GO:0005070	SH3/SH2 adaptor activity	http://amigo.geneontology.org/amigo/term/GO:0005070	7	1128	53	16560	1.94484	392;2885;6714;1123;940;3927;55824	ARHGAP1;GRB2;SRC;CHN1;CD28;LASP1;PAG1	0.0861766	1.06461	0.456516
GO:0005200	structural constituent of cytoskeleton	http://amigo.geneontology.org/amigo/term/GO:0005200	11	1128	98	16560	1.65423	10092;1756;120;10403;375790;7168;6711;7846;84790;203068;7280	ARPC5;DMD;ADD3;NDC80;AGRN;TPM1;SPTBN1;TUBA1A;TUBA1C;TUBB;TUBB2A	0.0874492	1.05824	0.456516
GO:0019870	potassium channel inhibitor activity	http://amigo.geneontology.org/amigo/term/GO:0019870	2	1128	6	16560	4.90053	3776;23327	KCNK2;NEDD4L	0.0880335	1.05535	0.456516
GO:0016174	NAD(P)H oxidase activity	http://amigo.geneontology.org/amigo/term/GO:0016174	2	1128	6	16560	4.90053	50507;8564	NOX4;KMO	0.0880335	1.05535	0.456516
GO:0043237	laminin-1 binding	http://amigo.geneontology.org/amigo/term/GO:0043237	2	1128	6	16560	4.90053	9353;4811	SLIT2;NID1	0.0880335	1.05535	0.456516
GO:0042608	T cell receptor binding	http://amigo.geneontology.org/amigo/term/GO:0042608	2	1128	6	16560	4.90053	1794;2534	DOCK2;FYN	0.0880335	1.05535	0.456516
GO:0030544	Hsp70 protein binding	http://amigo.geneontology.org/amigo/term/GO:0030544	4	1128	23	16560	2.55872	3337;983;3301;5481	DNAJB1;CDK1;DNAJA1;PPID	0.0898032	1.04671	0.456516
GO:0046332	SMAD binding	http://amigo.geneontology.org/amigo/term/GO:0046332	6	1128	43	16560	2.0541	1499;7046;1278;94;658;2316	CTNNB1;TGFBR1;COL1A2;ACVRL1;BMPR1B;FLNA	0.0899283	1.0461	0.456516
GO:0008430	selenium binding	http://amigo.geneontology.org/amigo/term/GO:0008430	3	1128	14	16560	3.15162	2876;6414;9403	GPX1;SEPP1;SEP15	0.090136	1.0451	0.456516
GO:0048038	quinone binding	http://amigo.geneontology.org/amigo/term/GO:0048038	3	1128	14	16560	3.15162	58472;314;9540	SQRDL;AOC2;TP53I3	0.090136	1.0451	0.456516
GO:0030246	carbohydrate binding	http://amigo.geneontology.org/amigo/term/GO:0030246	18	1128	185	16560	1.43535	2589;50856;9976;3824;22859;79868;7123;160364;3965;9902;1462;947;4125;202;57124;8972;22918;2548	GALNT1;CLEC4A;CLEC2B;KLRD1;ADGRL1;ALG13;CLEC3B;CLEC12A;LGALS9;MRC2;VCAN;CD34;MAN2B1;AIM1;CD248;MGAM;CD93;GAA	0.0980971	1.00834	0.493288
GO:0019899	enzyme binding	http://amigo.geneontology.org/amigo/term/GO:0019899	28	1128	312	16560	1.32559	1499;3091;5728;23555;409;3162;847;6714;10159;3014;7533;595;23406;81619;1528;66008;1893;3965;23621;9079;401494;950;3920;3725;201562;7153;5329;3912	CTNNB1;HIF1A;PTEN;TSPAN15;ARRB2;HMOX1;CAT;SRC;ATP6AP2;H2AFX;YWHAH;CCND1;COTL1;TSPAN14;CYB5A;TRAK2;ECM1;LGALS9;BACE1;LDB2;HACD4;SCARB2;LAMP2;JUN;HACD2;TOP2A;PLAUR;LAMB1	0.0992553	1.00325	0.494179
GO:0004622	lysophospholipase activity	http://amigo.geneontology.org/amigo/term/GO:0004622	3	1128	15	16560	2.94133	5321;5168;50640	PLA2G4A;ENPP2;PNPLA8	0.103258	0.986076	0.494179
GO:0005229	intracellular calcium activated chloride channel activity	http://amigo.geneontology.org/amigo/term/GO:0005229	3	1128	15	16560	2.94133	80727;196527;55107	TTYH3;ANO6;ANO1	0.103258	0.986076	0.494179
GO:0008157	protein phosphatase 1 binding	http://amigo.geneontology.org/amigo/term/GO:0008157	3	1128	15	16560	2.94133	84687;10288;23645	PPP1R9B;LILRB2;PPP1R15A	0.103258	0.986076	0.494179
GO:0097110	scaffold protein binding	http://amigo.geneontology.org/amigo/term/GO:0097110	6	1128	45	16560	1.96257	1742;6714;54209;4038;9456;24145	DLG4;SRC;TREM2;LRP4;HOMER1;PANX1	0.10432	0.981633	0.494179
GO:0005114	type II transforming growth factor beta receptor binding	http://amigo.geneontology.org/amigo/term/GO:0005114	2	1128	7	16560	4.2002	2022;7046	ENG;TGFBR1	0.108544	0.964395	0.494179
GO:0031995	insulin-like growth factor II binding	http://amigo.geneontology.org/amigo/term/GO:0031995	2	1128	7	16560	4.2002	3486;3487	IGFBP3;IGFBP4	0.108544	0.964395	0.494179
GO:0016004	phospholipase activator activity	http://amigo.geneontology.org/amigo/term/GO:0016004	2	1128	7	16560	4.2002	6352;2760	CCL5;GM2A	0.108544	0.964395	0.494179
GO:0005138	interleukin-6 receptor binding	http://amigo.geneontology.org/amigo/term/GO:0005138	2	1128	7	16560	4.2002	51752;3569	ERAP1;IL6	0.108544	0.964395	0.494179
GO:0035005	1-phosphatidylinositol-4-phosphate 3-kinase activity	http://amigo.geneontology.org/amigo/term/GO:0035005	2	1128	7	16560	4.2002	5287;5294	PIK3C2B;PIK3CG	0.108544	0.964395	0.494179
GO:0016018	cyclosporin A binding	http://amigo.geneontology.org/amigo/term/GO:0016018	2	1128	7	16560	4.2002	5480;5481	PPIC;PPID	0.108544	0.964395	0.494179
GO:0001849	complement component C1q binding	http://amigo.geneontology.org/amigo/term/GO:0001849	2	1128	7	16560	4.2002	5806;22918	PTX3;CD93	0.108544	0.964395	0.494179
GO:0004675	transmembrane receptor protein serine/threonine kinase activity	http://amigo.geneontology.org/amigo/term/GO:0004675	2	1128	7	16560	4.2002	94;658	ACVRL1;BMPR1B	0.108544	0.964395	0.494179
GO:0035254	glutamate receptor binding	http://amigo.geneontology.org/amigo/term/GO:0035254	2	1128	7	16560	4.2002	79953;10627	SYNDIG1;MYL12A	0.108544	0.964395	0.494179
GO:0030971	receptor tyrosine kinase binding	http://amigo.geneontology.org/amigo/term/GO:0030971	5	1128	35	16560	2.10215	285;9732;284;4038;5111	ANGPT2;DOCK4;ANGPT1;LRP4;PCNA	0.108804	0.963357	0.494179
GO:0016301	kinase activity	http://amigo.geneontology.org/amigo/term/GO:0016301	6	1128	46	16560	1.91979	6714;259230;898;1020;166929;5347	SRC;SGMS1;CCNE1;CDK5;SGMS2;PLK1	0.111938	0.951021	0.502255
GO:0043130	ubiquitin binding	http://amigo.geneontology.org/amigo/term/GO:0043130	7	1128	57	16560	1.80793	81930;7334;7345;7128;89853;7153;7852	KIF18A;UBE2N;UCHL1;TNFAIP3;MVB12B;TOP2A;CXCR4	0.112009	0.950749	0.502255
GO:0005216	ion channel activity	http://amigo.geneontology.org/amigo/term/GO:0005216	3	1128	16	16560	2.75733	55013;10052;51393	CCDC109B;GJC1;TRPV2	0.11708	0.931516	0.518273
GO:0005355	glucose transmembrane transporter activity	http://amigo.geneontology.org/amigo/term/GO:0005355	3	1128	16	16560	2.75733	144195;6515;6518	SLC2A14;SLC2A3;SLC2A5	0.11708	0.931516	0.518273
GO:0001102	RNA polymerase II activating transcription factor binding	http://amigo.geneontology.org/amigo/term/GO:0001102	5	1128	36	16560	2.04363	1499;23493;6926;3429;3725	CTNNB1;HEY2;TBX3;IFI27;JUN	0.117789	0.928894	0.518273
GO:0004888	transmembrane signaling receptor activity	http://amigo.geneontology.org/amigo/term/GO:0004888	18	1128	191	16560	1.38976	2022;50856;10871;7099;10261;355;2123;3554;3824;10894;9369;7100;84168;9103;4360;10990;8685;976	ENG;CLEC4A;CD300C;TLR4;IGSF6;FAS;EVI2A;IL1R1;KLRD1;LYVE1;NRXN3;TLR5;ANTXR1;FCGR2C;MRC1;LILRB5;MARCO;ADGRE5	0.119813	0.921495	0.520747
GO:0008009	chemokine activity	http://amigo.geneontology.org/amigo/term/GO:0008009	6	1128	47	16560	1.87883	6357;6376;6387;6352;6347;58191	CCL13;CX3CL1;CXCL12;CCL5;CCL2;CXCL16	0.119831	0.921431	0.520747
GO:0035591	signaling adaptor activity	http://amigo.geneontology.org/amigo/term/GO:0035591	2	1128	8	16560	3.67496	10019;9456	SH2B3;HOMER1	0.130148	0.885562	0.535671
GO:0008494	translation activator activity	http://amigo.geneontology.org/amigo/term/GO:0008494	2	1128	8	16560	3.67496	1618;51065	DAZL;RPS27L	0.130148	0.885562	0.535671
GO:0034235	GPI anchor binding	http://amigo.geneontology.org/amigo/term/GO:0034235	2	1128	8	16560	3.67496	7070;8876	THY1;VNN1	0.130148	0.885562	0.535671
GO:0042379	chemokine receptor binding	http://amigo.geneontology.org/amigo/term/GO:0042379	2	1128	8	16560	3.67496	6387;6352	CXCL12;CCL5	0.130148	0.885562	0.535671
GO:0016705	oxidoreductase activity, acting on paired donors, with incorporation or reduction of molecular oxygen	http://amigo.geneontology.org/amigo/term/GO:0016705	2	1128	8	16560	3.67496	6916;5740	TBXAS1;PTGIS	0.130148	0.885562	0.535671
GO:0031748	D1 dopamine receptor binding	http://amigo.geneontology.org/amigo/term/GO:0031748	2	1128	8	16560	3.67496	1742;409	DLG4;ARRB2	0.130148	0.885562	0.535671
GO:0071933	Arp2/3 complex binding	http://amigo.geneontology.org/amigo/term/GO:0071933	2	1128	8	16560	3.67496	9535;10788	GMFG;IQGAP2	0.130148	0.885562	0.535671
GO:0038036	sphingosine-1-phosphate receptor activity	http://amigo.geneontology.org/amigo/term/GO:0038036	2	1128	8	16560	3.67496	1903;1901	S1PR3;S1PR1	0.130148	0.885562	0.535671
GO:0001671	ATPase activator activity	http://amigo.geneontology.org/amigo/term/GO:0001671	3	1128	17	16560	2.59498	3337;483;29103	DNAJB1;ATP1B3;DNAJC15	0.131545	0.880924	0.535671
GO:0031267	small GTPase binding	http://amigo.geneontology.org/amigo/term/GO:0031267	3	1128	17	16560	2.59498	55920;89846;2316	RCC2;FGD3;FLNA	0.131545	0.880924	0.535671
GO:0030165	PDZ domain binding	http://amigo.geneontology.org/amigo/term/GO:0030165	9	1128	83	16560	1.59666	1742;5728;2697;9732;8324;1837;8321;23705;6641	DLG4;PTEN;GJA1;DOCK4;FZD7;DTNA;FZD1;CADM1;SNTB1	0.131765	0.880199	0.535671
GO:0019838	growth factor binding	http://amigo.geneontology.org/amigo/term/GO:0019838	4	1128	27	16560	2.17912	7046;8829;3791;8828	TGFBR1;NRP1;KDR;NRP2	0.132396	0.878125	0.535671
GO:0001077	transcriptional activator activity, RNA polymerase II core promoter proximal region sequence-specific binding	http://amigo.geneontology.org/amigo/term/GO:0001077	20	1128	222	16560	1.32842	3091;22797;51176;10736;8013;3516;860;6495;2000;9935;2353;2354;6688;3725;4086;4609;90993;26508;64641;2004	HIF1A;TFEC;LEF1;SIX2;NR4A3;RBPJ;RUNX2;SIX1;ELF4;MAFB;FOS;FOSB;SPI1;JUN;SMAD1;MYC;CREB3L1;HEYL;EBF2;ELK3	0.141388	0.849587	0.562551
GO:0000979	RNA polymerase II core promoter sequence-specific DNA binding	http://amigo.geneontology.org/amigo/term/GO:0000979	6	1128	50	16560	1.76578	3516;860;2353;6688;4086;26508	RBPJ;RUNX2;FOS;SPI1;SMAD1;HEYL	0.145086	0.838375	0.562551
GO:0004602	glutathione peroxidase activity	http://amigo.geneontology.org/amigo/term/GO:0004602	3	1128	18	16560	2.45067	2876;241;4257	GPX1;ALOX5AP;MGST1	0.146594	0.833883	0.562551
GO:0005539	glycosaminoglycan binding	http://amigo.geneontology.org/amigo/term/GO:0005539	3	1128	18	16560	2.45067	2022;1462;5104	ENG;VCAN;SERPINA5	0.146594	0.833883	0.562551
GO:0016409	palmitoyltransferase activity	http://amigo.geneontology.org/amigo/term/GO:0016409	3	1128	18	16560	2.45067	51304;253832;55625	ZDHHC3;ZDHHC20;ZDHHC7	0.146594	0.833883	0.562551
GO:0031435	mitogen-activated protein kinase kinase kinase binding	http://amigo.geneontology.org/amigo/term/GO:0031435	3	1128	18	16560	2.45067	5594;11329;998	MAPK1;STK38;CDC42	0.146594	0.833883	0.562551
GO:0050750	low-density lipoprotein particle receptor binding	http://amigo.geneontology.org/amigo/term/GO:0050750	3	1128	18	16560	2.45067	409;3301;4322	ARRB2;DNAJA1;MMP13	0.146594	0.833883	0.562551
GO:0005528	FK506 binding	http://amigo.geneontology.org/amigo/term/GO:0005528	3	1128	18	16560	2.45067	51303;23508;11328	FKBP11;TTC9;FKBP9	0.146594	0.833883	0.562551
GO:0004713	protein tyrosine kinase activity	http://amigo.geneontology.org/amigo/term/GO:0004713	9	1128	86	16560	1.54068	5756;8444;6714;2534;5159;3791;25;7272;27	TWF1;DYRK3;SRC;FYN;PDGFRB;KDR;ABL1;TTK;ABL2	0.151441	0.819758	0.562551
GO:0016918	retinal binding	http://amigo.geneontology.org/amigo/term/GO:0016918	2	1128	9	16560	3.26643	1381;1382	CRABP1;CRABP2	0.152624	0.816377	0.562551
GO:0033691	sialic acid binding	http://amigo.geneontology.org/amigo/term/GO:0033691	2	1128	9	16560	3.26643	7903;375790	ST8SIA4;AGRN	0.152624	0.816377	0.562551
GO:0004629	phospholipase C activity	http://amigo.geneontology.org/amigo/term/GO:0004629	2	1128	9	16560	3.26643	5334;5330	PLCL1;PLCB2	0.152624	0.816377	0.562551
GO:0004114	3',5'-cyclic-nucleotide phosphodiesterase activity	http://amigo.geneontology.org/amigo/term/GO:0004114	2	1128	9	16560	3.26643	8654;10846	PDE5A;PDE10A	0.152624	0.816377	0.562551
GO:0070700	BMP receptor binding	http://amigo.geneontology.org/amigo/term/GO:0070700	2	1128	9	16560	3.26643	656;353500	BMP8B;BMP8A	0.152624	0.816377	0.562551
GO:0047555	3',5'-cyclic-GMP phosphodiesterase activity	http://amigo.geneontology.org/amigo/term/GO:0047555	2	1128	9	16560	3.26643	8654;10846	PDE5A;PDE10A	0.152624	0.816377	0.562551
GO:0008139	nuclear localization sequence binding	http://amigo.geneontology.org/amigo/term/GO:0008139	2	1128	9	16560	3.26643	3838;3839	KPNA2;KPNA3	0.152624	0.816377	0.562551
GO:0005522	profilin binding	http://amigo.geneontology.org/amigo/term/GO:0005522	2	1128	9	16560	3.26643	7456;1627	WIPF1;DBN1	0.152624	0.816377	0.562551
GO:0008289	lipid binding	http://amigo.geneontology.org/amigo/term/GO:0008289	13	1128	136	16560	1.40802	5728;54874;26207;10395;6281;161;948;89853;5360;1903;1622;581;2171	PTEN;FNBP1L;PITPNC1;DLC1;S100A10;AP2A2;CD36;MVB12B;PLTP;S1PR3;DBI;BAX;FABP5	0.155785	0.807475	0.57005
GO:0004712	protein serine/threonine/tyrosine kinase activity	http://amigo.geneontology.org/amigo/term/GO:0004712	4	1128	29	16560	2.02859	8444;6790;6446;7272	DYRK3;AURKA;SGK1;TTK	0.156278	0.806102	0.57005
GO:0035255	ionotropic glutamate receptor binding	http://amigo.geneontology.org/amigo/term/GO:0035255	3	1128	19	16560	2.32154	1742;3554;81831	DLG4;IL1R1;NETO2	0.162168	0.790035	0.570831
GO:0070064	proline-rich region binding	http://amigo.geneontology.org/amigo/term/GO:0070064	3	1128	19	16560	2.32154	595;5216;25	CCND1;PFN1;ABL1	0.162168	0.790035	0.570831
GO:0051019	mitogen-activated protein kinase binding	http://amigo.geneontology.org/amigo/term/GO:0051019	3	1128	19	16560	2.32154	409;1636;25	ARRB2;ACE;ABL1	0.162168	0.790035	0.570831
GO:0008301	DNA binding, bending	http://amigo.geneontology.org/amigo/term/GO:0008301	3	1128	19	16560	2.32154	51176;1396;7153	LEF1;CRIP1;TOP2A	0.162168	0.790035	0.570831
GO:0015078	hydrogen ion transmembrane transporter activity	http://amigo.geneontology.org/amigo/term/GO:0015078	3	1128	19	16560	2.32154	526;206358;533	ATP6V1B2;SLC36A1;ATP6V0B	0.162168	0.790035	0.570831
GO:0016791	phosphatase activity	http://amigo.geneontology.org/amigo/term/GO:0016791	3	1128	19	16560	2.32154	57103;11221;5501	TIGAR;DUSP10;PPP1CC	0.162168	0.790035	0.570831
GO:0005242	inward rectifier potassium channel activity	http://amigo.geneontology.org/amigo/term/GO:0005242	3	1128	19	16560	2.32154	3762;3759;3772	KCNJ5;KCNJ2;KCNJ15	0.162168	0.790035	0.570831
GO:0051117	ATPase binding	http://amigo.geneontology.org/amigo/term/GO:0051117	7	1128	64	16560	1.6095	3337;29887;483;7430;23545;5898;10312	DNAJB1;SNX10;ATP1B3;EZR;ATP6V0A2;RALA;TCIRG1	0.16573	0.7806	0.578242
GO:0003755	peptidyl-prolyl cis-trans isomerase activity	http://amigo.geneontology.org/amigo/term/GO:0003755	5	1128	41	16560	1.79387	51303;23508;5480;11328;5481	FKBP11;TTC9;PPIC;FKBP9;PPID	0.167528	0.775913	0.578242
GO:0042169	SH2 domain binding	http://amigo.geneontology.org/amigo/term/GO:0042169	4	1128	30	16560	1.96085	6714;10395;285590;55824	SRC;DLC1;SH3PXD2B;PAG1	0.168778	0.772685	0.578242
GO:0005164	tumor necrosis factor receptor binding	http://amigo.geneontology.org/amigo/term/GO:0005164	4	1128	30	16560	1.96085	51752;8600;10673;944	ERAP1;TNFSF11;TNFSF13B;TNFSF8	0.168778	0.772685	0.578242
GO:0020037	heme binding	http://amigo.geneontology.org/amigo/term/GO:0020037	12	1128	126	16560	1.40246	3162;847;6714;9420;6916;1545;50507;1536;2983;1528;1586;5740	HMOX1;CAT;SRC;CYP7B1;TBXAS1;CYP1B1;NOX4;CYBB;GUCY1B3;CYB5A;CYP17A1;PTGIS	0.170447	0.768412	0.578242
GO:0042826	histone deacetylase binding	http://amigo.geneontology.org/amigo/term/GO:0042826	9	1128	89	16560	1.48848	3091;23493;3838;639;595;10467;860;51053;7153	HIF1A;HEY2;KPNA2;PRDM1;CCND1;ZNHIT1;RUNX2;GMNN;TOP2A	0.172474	0.763276	0.578242
GO:0008565	protein transporter activity	http://amigo.geneontology.org/amigo/term/GO:0008565	7	1128	65	16560	1.58464	3838;23480;161;3839;10268;10203;29103	KPNA2;SEC61G;AP2A2;KPNA3;RAMP3;CALCRL;DNAJC15	0.174208	0.758931	0.578242
GO:0019855	calcium channel inhibitor activity	http://amigo.geneontology.org/amigo/term/GO:0019855	2	1128	10	16560	2.93961	55013;29085	CCDC109B;PHPT1	0.175773	0.755049	0.578242
GO:0031702	type 1 angiotensin receptor binding	http://amigo.geneontology.org/amigo/term/GO:0031702	2	1128	10	16560	2.93961	10672;409	GNA13;ARRB2	0.175773	0.755049	0.578242
GO:0008028	monocarboxylic acid transmembrane transporter activity	http://amigo.geneontology.org/amigo/term/GO:0008028	2	1128	10	16560	2.93961	9120;6567	SLC16A6;SLC16A2	0.175773	0.755049	0.578242
GO:0016504	peptidase activator activity	http://amigo.geneontology.org/amigo/term/GO:0016504	2	1128	10	16560	2.93961	4323;5118	MMP14;PCOLCE	0.175773	0.755049	0.578242
GO:0017166	vinculin binding	http://amigo.geneontology.org/amigo/term/GO:0017166	2	1128	10	16560	2.93961	1756;87	DMD;ACTN1	0.175773	0.755049	0.578242
GO:0016175	superoxide-generating NADPH oxidase activity	http://amigo.geneontology.org/amigo/term/GO:0016175	2	1128	10	16560	2.93961	50507;1536	NOX4;CYBB	0.175773	0.755049	0.578242
GO:0015267	channel activity	http://amigo.geneontology.org/amigo/term/GO:0015267	2	1128	10	16560	2.93961	26872;581	STEAP1;BAX	0.175773	0.755049	0.578242
GO:0030506	ankyrin binding	http://amigo.geneontology.org/amigo/term/GO:0030506	3	1128	20	16560	2.20533	5339;6711;6546	PLEC;SPTBN1;SLC8A1	0.178208	0.749072	0.580827
GO:0005351	sugar:proton symporter activity	http://amigo.geneontology.org/amigo/term/GO:0005351	3	1128	20	16560	2.20533	144195;6515;6518	SLC2A14;SLC2A3;SLC2A5	0.178208	0.749072	0.580827
GO:0005215	transporter activity	http://amigo.geneontology.org/amigo/term/GO:0005215	13	1128	141	16560	1.35768	1381;10060;10112;4363;28232;533;5730;6567;10312;26872;1382;2171;439	CRABP1;ABCC9;KIF20A;ABCC1;SLCO3A1;ATP6V0B;PTGDS;SLC16A2;TCIRG1;STEAP1;CRABP2;FABP5;ASNA1	0.184219	0.734667	0.597649
GO:0004896	cytokine receptor activity	http://amigo.geneontology.org/amigo/term/GO:0004896	3	1128	21	16560	2.10019	2152;960;972	F3;CD44;CD74	0.194657	0.71073	0.621193
GO:0005247	voltage-gated chloride channel activity	http://amigo.geneontology.org/amigo/term/GO:0005247	2	1128	11	16560	2.67221	196527;55107	ANO6;ANO1	0.199417	0.700238	0.621193
GO:0005243	gap junction channel activity	http://amigo.geneontology.org/amigo/term/GO:0005243	2	1128	11	16560	2.67221	2697;10052	GJA1;GJC1	0.199417	0.700238	0.621193
GO:0010314	phosphatidylinositol-5-phosphate binding	http://amigo.geneontology.org/amigo/term/GO:0010314	2	1128	11	16560	2.67221	285590;54477	SH3PXD2B;PLEKHA5	0.199417	0.700238	0.621193
GO:0050786	RAGE receptor binding	http://amigo.geneontology.org/amigo/term/GO:0050786	2	1128	11	16560	2.67221	6275;2357	S100A4;FPR1	0.199417	0.700238	0.621193
GO:0008239	dipeptidyl-peptidase activity	http://amigo.geneontology.org/amigo/term/GO:0008239	2	1128	11	16560	2.67221	2191;1803	FAP;DPP4	0.199417	0.700238	0.621193
GO:0016303	1-phosphatidylinositol-3-kinase activity	http://amigo.geneontology.org/amigo/term/GO:0016303	2	1128	11	16560	2.67221	5287;5294	PIK3C2B;PIK3CG	0.199417	0.700238	0.621193
GO:0043295	glutathione binding	http://amigo.geneontology.org/amigo/term/GO:0043295	2	1128	11	16560	2.67221	2876;4257	GPX1;MGST1	0.199417	0.700238	0.621193
GO:0008195	phosphatidate phosphatase activity	http://amigo.geneontology.org/amigo/term/GO:0008195	2	1128	11	16560	2.67221	8611;9890	PPAP2A;LPPR4	0.199417	0.700238	0.621193
GO:0001972	retinoic acid binding	http://amigo.geneontology.org/amigo/term/GO:0001972	3	1128	22	16560	2.00461	1381;5104;1382	CRABP1;SERPINA5;CRABP2	0.211459	0.674775	0.655801
GO:0019900	kinase binding	http://amigo.geneontology.org/amigo/term/GO:0019900	7	1128	70	16560	1.47101	1742;1499;25780;355;3939;7128;5211	DLG4;CTNNB1;RASGRP3;FAS;LDHA;TNFAIP3;PFKL	0.21919	0.65918	0.659726
GO:0046983	protein dimerization activity	http://amigo.geneontology.org/amigo/term/GO:0046983	13	1128	147	16560	1.30178	22797;196;23493;2191;4689;1879;3399;56938;4609;1622;1759;64641;23462	TFEC;AHR;HEY2;FAP;NCF4;EBF1;ID3;ARNTL2;MYC;DBI;DNM1;EBF2;HEY1	0.221326	0.654968	0.659726
GO:0070888	E-box binding	http://amigo.geneontology.org/amigo/term/GO:0070888	4	1128	34	16560	1.72975	196;7291;56938;4609	AHR;TWIST1;ARNTL2;MYC	0.22187	0.653901	0.659726
GO:0030331	estrogen receptor binding	http://amigo.geneontology.org/amigo/term/GO:0030331	4	1128	34	16560	1.72975	1499;51176;5481;5111	CTNNB1;LEF1;PPID;PCNA	0.22187	0.653901	0.659726
GO:0001540	beta-amyloid binding	http://amigo.geneontology.org/amigo/term/GO:0001540	4	1128	34	16560	1.72975	323;23621;972;1471	APBB2;BACE1;CD74;CST3	0.22187	0.653901	0.659726
GO:0001948	glycoprotein binding	http://amigo.geneontology.org/amigo/term/GO:0001948	6	1128	58	16560	1.52148	3684;3956;2534;658;2316;5327	ITGAM;LGALS1;FYN;BMPR1B;FLNA;PLAT	0.222467	0.652734	0.659726
GO:0008235	metalloexopeptidase activity	http://amigo.geneontology.org/amigo/term/GO:0008235	2	1128	12	16560	2.44938	51752;51056	ERAP1;LAP3	0.2234	0.650917	0.659726
GO:0030247	polysaccharide binding	http://amigo.geneontology.org/amigo/term/GO:0030247	2	1128	12	16560	2.44938	56241;5168	SUSD2;ENPP2	0.2234	0.650917	0.659726
GO:0042834	peptidoglycan binding	http://amigo.geneontology.org/amigo/term/GO:0042834	2	1128	12	16560	2.44938	54209;114548	TREM2;NLRP3	0.2234	0.650917	0.659726
GO:0048185	activin binding	http://amigo.geneontology.org/amigo/term/GO:0048185	2	1128	12	16560	2.44938	2022;94	ENG;ACVRL1	0.2234	0.650917	0.659726
GO:0032395	MHC class II receptor activity	http://amigo.geneontology.org/amigo/term/GO:0032395	2	1128	12	16560	2.44938	3122;3118	HLA-DRA;HLA-DQA2	0.2234	0.650917	0.659726
GO:0004715	non-membrane spanning protein tyrosine kinase activity	http://amigo.geneontology.org/amigo/term/GO:0004715	5	1128	46	16560	1.5984	6714;2534;79834;25;27	SRC;FYN;PEAK1;ABL1;ABL2	0.223969	0.649811	0.659726
GO:0043014	alpha-tubulin binding	http://amigo.geneontology.org/amigo/term/GO:0043014	3	1128	23	16560	1.91733	10808;10123;29127	HSPH1;ARL4C;RACGAP1	0.228558	0.641004	0.670437
GO:0004252	serine-type endopeptidase activity	http://amigo.geneontology.org/amigo/term/GO:0004252	13	1128	149	16560	1.28415	11098;4313;3426;717;2191;5125;54933;1803;715;7177;5328;1200;5327	PRSS23;MMP2;CFI;C2;FAP;PCSK5;RHBDL2;DPP4;C1R;TPSAB1;PLAU;TPP1;PLAT	0.234348	0.630138	0.676962
GO:0004722	protein serine/threonine phosphatase activity	http://amigo.geneontology.org/amigo/term/GO:0004722	5	1128	47	16560	1.56429	5728;54704;1033;8555;5501	PTEN;PDP1;CDKN3;CDC14B;PPP1CC	0.235888	0.627295	0.676962
GO:0046982	protein heterodimerization activity	http://amigo.geneontology.org/amigo/term/GO:0046982	36	1128	463	16560	1.14616	3091;10051;3014;196;8340;4281;4170;8345;185;4790;7533;1536;2983;8342;58494;94239;1810;3984;3656;387103;57186;7291;824;55107;5228;467;9456;3688;121551;2131;4086;581;7153;7423;26508;24145	HIF1A;SMC4;H2AFX;AHR;HIST1H2BL;MID1;MCL1;HIST1H2BH;AGTR1;NFKB1;YWHAH;CYBB;GUCY1B3;HIST1H2BM;JAM2;H2AFV;DR1;LIMK1;IRAK2;CENPW;RALGAPA2;TWIST1;CAPN2;ANO1;PGF;ATF3;HOMER1;ITGB1;BTBD11;EXT1;SMAD1;BAX;TOP2A;VEGFB;HEYL;PANX1	0.24285	0.614662	0.676962
GO:0070402	NADPH binding	http://amigo.geneontology.org/amigo/term/GO:0070402	2	1128	13	16560	2.26083	7881;9540	KCNAB1;TP53I3	0.247582	0.606281	0.676962
GO:0005227	calcium activated cation channel activity	http://amigo.geneontology.org/amigo/term/GO:0005227	2	1128	13	16560	2.26083	196527;55107	ANO6;ANO1	0.247582	0.606281	0.676962
GO:0008514	organic anion transmembrane transporter activity	http://amigo.geneontology.org/amigo/term/GO:0008514	2	1128	13	16560	2.26083	11309;8714	SLCO2B1;ABCC3	0.247582	0.606281	0.676962
GO:0035497	cAMP response element binding	http://amigo.geneontology.org/amigo/term/GO:0035497	2	1128	13	16560	2.26083	3725;90993	JUN;CREB3L1	0.247582	0.606281	0.676962
GO:0005088	Ras guanyl-nucleotide exchange factor activity	http://amigo.geneontology.org/amigo/term/GO:0005088	2	1128	13	16560	2.26083	25780;153020	RASGRP3;RASGEF1B	0.247582	0.606281	0.676962
GO:0004467	long-chain fatty acid-CoA ligase activity	http://amigo.geneontology.org/amigo/term/GO:0004467	2	1128	13	16560	2.26083	2180;11000	ACSL1;SLC27A3	0.247582	0.606281	0.676962
GO:0008143	poly(A) binding	http://amigo.geneontology.org/amigo/term/GO:0008143	2	1128	13	16560	2.26083	9775;11030	EIF4A3;RBPMS	0.247582	0.606281	0.676962
GO:0019841	retinol binding	http://amigo.geneontology.org/amigo/term/GO:0019841	2	1128	13	16560	2.26083	1381;1382	CRABP1;CRABP2	0.247582	0.606281	0.676962
GO:0045028	G-protein coupled purinergic nucleotide receptor activity	http://amigo.geneontology.org/amigo/term/GO:0045028	2	1128	13	16560	2.26083	5724;2857	PTAFR;GPR34	0.247582	0.606281	0.676962
GO:0005198	structural molecule activity	http://amigo.geneontology.org/amigo/term/GO:0005198	16	1128	191	16560	1.23312	4133;4130;4000;55700;9019;9276;4131;84823;7846;9076;84790;6641;5414;3912;203068;7414	MAP2;MAP1A;LMNA;MAP7D1;MPZL1;COPB2;MAP1B;LMNB2;TUBA1A;CLDN1;TUBA1C;SNTB1;SEPT4;LAMB1;TUBB;VCL	0.247896	0.605731	0.676962
GO:0030145	manganese ion binding	http://amigo.geneontology.org/amigo/term/GO:0030145	5	1128	49	16560	1.50026	2589;7511;51056;25;27	GALNT1;XPNPEP1;LAP3;ABL1;ABL2	0.26022	0.584659	0.676962
GO:0019706	protein-cysteine S-palmitoyltransferase activity	http://amigo.geneontology.org/amigo/term/GO:0019706	3	1128	25	16560	1.76373	51304;253832;55625	ZDHHC3;ZDHHC20;ZDHHC7	0.263441	0.579317	0.676962
GO:0043027	cysteine-type endopeptidase inhibitor activity involved in apoptotic process	http://amigo.geneontology.org/amigo/term/GO:0043027	3	1128	25	16560	1.76373	330;51176;4671	BIRC3;LEF1;NAIP	0.263441	0.579317	0.676962
GO:0042626	ATPase activity, coupled to transmembrane movement of substances	http://amigo.geneontology.org/amigo/term/GO:0042626	4	1128	37	16560	1.58921	10060;4363;340273;8714	ABCC9;ABCC1;ABCB5;ABCC3	0.264168	0.578119	0.676962
GO:0051287	NAD binding	http://amigo.geneontology.org/amigo/term/GO:0051287	4	1128	37	16560	1.58921	3939;23530;3418;4200	LDHA;NNT;IDH2;ME2	0.264168	0.578119	0.676962
GO:0005109	frizzled binding	http://amigo.geneontology.org/amigo/term/GO:0005109	4	1128	37	16560	1.58921	8324;81029;8321;6422	FZD7;WNT5B;FZD1;SFRP1	0.264168	0.578119	0.676962
GO:0008191	metalloendopeptidase inhibitor activity	http://amigo.geneontology.org/amigo/term/GO:0008191	2	1128	14	16560	2.09921	6695;56925	SPOCK1;LXN	0.271841	0.565685	0.676962
GO:0005542	folic acid binding	http://amigo.geneontology.org/amigo/term/GO:0005542	2	1128	14	16560	2.09921	7298;2350	TYMS;FOLR2	0.271841	0.565685	0.676962
GO:0005149	interleukin-1 receptor binding	http://amigo.geneontology.org/amigo/term/GO:0005149	2	1128	14	16560	2.09921	7100;3553	TLR5;IL1B	0.271841	0.565685	0.676962
GO:0035326	enhancer binding	http://amigo.geneontology.org/amigo/term/GO:0035326	2	1128	14	16560	2.09921	51176;196	LEF1;AHR	0.271841	0.565685	0.676962
GO:0031996	thioesterase binding	http://amigo.geneontology.org/amigo/term/GO:0031996	2	1128	14	16560	2.09921	998;382	CDC42;ARF6	0.271841	0.565685	0.676962
GO:0005095	GTPase inhibitor activity	http://amigo.geneontology.org/amigo/term/GO:0005095	2	1128	14	16560	2.09921	9353;10788	SLIT2;IQGAP2	0.271841	0.565685	0.676962
GO:0070742	C2H2 zinc finger domain binding	http://amigo.geneontology.org/amigo/term/GO:0070742	2	1128	14	16560	2.09921	51176;1879	LEF1;EBF1	0.271841	0.565685	0.676962
GO:0004683	calmodulin-dependent protein kinase activity	http://amigo.geneontology.org/amigo/term/GO:0004683	3	1128	26	16560	1.69579	817;1612;91624	CAMK2D;DAPK1;NEXN	0.281126	0.5511	0.676962
GO:0008017	microtubule binding	http://amigo.geneontology.org/amigo/term/GO:0008017	15	1128	183	16560	1.20609	81930;4133;4281;51203;55920;4130;10112;7430;55083;4131;5347;29127;80346;283431;10018	KIF18A;MAP2;MID1;NUSAP1;RCC2;MAP1A;KIF20A;EZR;KIF26B;MAP1B;PLK1;RACGAP1;REEP4;GAS2L3;BCL2L11	0.282003	0.549746	0.676962
GO:0005160	transforming growth factor beta receptor binding	http://amigo.geneontology.org/amigo/term/GO:0005160	4	1128	39	16560	1.50753	10220;3625;656;353500	GDF11;INHBB;BMP8B;BMP8A	0.293142	0.532922	0.676962
GO:0031434	mitogen-activated protein kinase kinase binding	http://amigo.geneontology.org/amigo/term/GO:0031434	2	1128	15	16560	1.95915	1636;28951	ACE;TRIB2	0.296068	0.528608	0.676962
GO:0042288	MHC class I protein binding	http://amigo.geneontology.org/amigo/term/GO:0042288	2	1128	15	16560	1.95915	10288;203068	LILRB2;TUBB	0.296068	0.528608	0.676962
GO:0005159	insulin-like growth factor receptor binding	http://amigo.geneontology.org/amigo/term/GO:0005159	2	1128	15	16560	1.95915	7533;3479	YWHAH;IGF1	0.296068	0.528608	0.676962
GO:0050811	GABA receptor binding	http://amigo.geneontology.org/amigo/term/GO:0050811	2	1128	15	16560	1.95915	66008;5334	TRAK2;PLCL1	0.296068	0.528608	0.676962
GO:0003705	transcription factor activity, RNA polymerase II distal enhancer sequence-specific binding	http://amigo.geneontology.org/amigo/term/GO:0003705	6	1128	65	16560	1.35705	3091;7091;51176;196;6688;3725	HIF1A;TLE4;LEF1;AHR;SPI1;JUN	0.29886	0.524532	0.676962
GO:0005244	voltage-gated ion channel activity	http://amigo.geneontology.org/amigo/term/GO:0005244	3	1128	27	16560	1.63289	1536;196527;1192	CYBB;ANO6;CLIC1	0.29891	0.524459	0.676962
GO:0031072	heat shock protein binding	http://amigo.geneontology.org/amigo/term/GO:0031072	4	1128	40	16560	1.46975	4790;3984;581;5481	NFKB1;LIMK1;BAX;PPID	0.307784	0.511754	0.676962
GO:0015459	potassium channel regulator activity	http://amigo.geneontology.org/amigo/term/GO:0015459	4	1128	40	16560	1.46975	10060;6446;23327;7881	ABCC9;SGK1;NEDD4L;KCNAB1	0.307784	0.511754	0.676962
GO:0005085	guanyl-nucleotide exchange factor activity	http://amigo.geneontology.org/amigo/term/GO:0005085	7	1128	79	16560	1.30271	25780;5877;9732;89846;57572;84079;28956	RASGRP3;RABIF;DOCK4;FGD3;DOCK6;ANKRD27;LAMTOR2	0.308515	0.510724	0.676962
GO:0004497	monooxygenase activity	http://amigo.geneontology.org/amigo/term/GO:0004497	3	1128	28	16560	1.57448	6916;1545;5740	TBXAS1;CYP1B1;PTGIS	0.316751	0.499282	0.676962
GO:0032266	phosphatidylinositol-3-phosphate binding	http://amigo.geneontology.org/amigo/term/GO:0032266	3	1128	28	16560	1.57448	285590;54477;4689	SH3PXD2B;PLEKHA5;NCF4	0.316751	0.499282	0.676962
GO:0061631	ubiquitin conjugating enzyme activity	http://amigo.geneontology.org/amigo/term/GO:0061631	3	1128	28	16560	1.57448	7334;11065;29089	UBE2N;UBE2C;UBE2T	0.316751	0.499282	0.676962
GO:0000978	RNA polymerase II core promoter proximal region sequence-specific DNA binding	http://amigo.geneontology.org/amigo/term/GO:0000978	26	1128	341	16560	1.12218	22797;51176;10736;5993;6926;639;3516;731220;860;6495;1879;3428;9603;2000;9935;2353;55636;2354;6688;3725;467;6909;4086;4609;64641;2004	TFEC;LEF1;SIX2;RFX5;TBX3;PRDM1;RBPJ;RFX8;RUNX2;SIX1;EBF1;IFI16;NFE2L3;ELF4;MAFB;FOS;CHD7;FOSB;SPI1;JUN;ATF3;TBX2;SMAD1;MYC;EBF2;ELK3	0.316968	0.498985	0.676962
GO:0008144	drug binding	http://amigo.geneontology.org/amigo/term/GO:0008144	7	1128	80	16560	1.28635	1636;7298;2350;7153;6422;10846;51311	ACE;TYMS;FOLR2;TOP2A;SFRP1;PDE10A;TLR8	0.318892	0.496357	0.676962
GO:0008353	RNA polymerase II carboxy-terminal domain kinase activity	http://amigo.geneontology.org/amigo/term/GO:0008353	2	1128	16	16560	1.83659	5594;983	MAPK1;CDK1	0.320169	0.49462	0.676962
GO:0030553	cGMP binding	http://amigo.geneontology.org/amigo/term/GO:0030553	2	1128	16	16560	1.83659	8654;10846	PDE5A;PDE10A	0.320169	0.49462	0.676962
GO:0004745	retinol dehydrogenase activity	http://amigo.geneontology.org/amigo/term/GO:0004745	2	1128	16	16560	1.83659	8644;51109	AKR1C3;RDH11	0.320169	0.49462	0.676962
GO:0030695	GTPase regulator activity	http://amigo.geneontology.org/amigo/term/GO:0030695	2	1128	16	16560	1.83659	29899;7454	GPSM2;WAS	0.320169	0.49462	0.676962
GO:0004867	serine-type endopeptidase inhibitor activity	http://amigo.geneontology.org/amigo/term/GO:0004867	8	1128	94	16560	1.25122	6695;5176;5054;871;1293;135228;5104;6691	SPOCK1;SERPINF1;SERPINE1;SERPINH1;COL6A3;CD109;SERPINA5;SPINK2	0.325209	0.487837	0.676962
GO:0008048	calcium sensitive guanylate cyclase activator activity	http://amigo.geneontology.org/amigo/term/GO:0008048	1	1128	5	16560	2.93789	5957	RCVRN	0.326613	0.485966	0.676962
GO:0050544	arachidonic acid binding	http://amigo.geneontology.org/amigo/term/GO:0050544	1	1128	5	16560	2.93789	241	ALOX5AP	0.326613	0.485966	0.676962
GO:0042289	MHC class II protein binding	http://amigo.geneontology.org/amigo/term/GO:0042289	1	1128	5	16560	2.93789	972	CD74	0.326613	0.485966	0.676962
GO:0032813	tumor necrosis factor receptor superfamily binding	http://amigo.geneontology.org/amigo/term/GO:0032813	1	1128	5	16560	2.93789	8600	TNFSF11	0.326613	0.485966	0.676962
GO:0042609	CD4 receptor binding	http://amigo.geneontology.org/amigo/term/GO:0042609	1	1128	5	16560	2.93789	2534	FYN	0.326613	0.485966	0.676962
GO:0052851	ferric-chelate reductase (NADPH) activity	http://amigo.geneontology.org/amigo/term/GO:0052851	1	1128	5	16560	2.93789	26872	STEAP1	0.326613	0.485966	0.676962
GO:0030883	endogenous lipid antigen binding	http://amigo.geneontology.org/amigo/term/GO:0030883	1	1128	5	16560	2.93789	911	CD1C	0.326613	0.485966	0.676962
GO:0004758	serine C-palmitoyltransferase activity	http://amigo.geneontology.org/amigo/term/GO:0004758	1	1128	5	16560	2.93789	9517	SPTLC2	0.326613	0.485966	0.676962
GO:0008273	calcium, potassium:sodium antiporter activity	http://amigo.geneontology.org/amigo/term/GO:0008273	1	1128	5	16560	2.93789	57419	SLC24A3	0.326613	0.485966	0.676962
GO:0015174	basic amino acid transmembrane transporter activity	http://amigo.geneontology.org/amigo/term/GO:0015174	1	1128	5	16560	2.93789	9056	SLC7A7	0.326613	0.485966	0.676962
GO:0004459	L-lactate dehydrogenase activity	http://amigo.geneontology.org/amigo/term/GO:0004459	1	1128	5	16560	2.93789	3939	LDHA	0.326613	0.485966	0.676962
GO:0004551	nucleotide diphosphatase activity	http://amigo.geneontology.org/amigo/term/GO:0004551	1	1128	5	16560	2.93789	5168	ENPP2	0.326613	0.485966	0.676962
GO:0004528	phosphodiesterase I activity	http://amigo.geneontology.org/amigo/term/GO:0004528	1	1128	5	16560	2.93789	5168	ENPP2	0.326613	0.485966	0.676962
GO:0004957	prostaglandin E receptor activity	http://amigo.geneontology.org/amigo/term/GO:0004957	1	1128	5	16560	2.93789	5732	PTGER2	0.326613	0.485966	0.676962
GO:0051525	NFAT protein binding	http://amigo.geneontology.org/amigo/term/GO:0051525	1	1128	5	16560	2.93789	6688	SPI1	0.326613	0.485966	0.676962
GO:0032027	myosin light chain binding	http://amigo.geneontology.org/amigo/term/GO:0032027	1	1128	5	16560	2.93789	7852	CXCR4	0.326613	0.485966	0.676962
GO:0008526	phosphatidylinositol transporter activity	http://amigo.geneontology.org/amigo/term/GO:0008526	1	1128	5	16560	2.93789	26207	PITPNC1	0.326613	0.485966	0.676962
GO:0008142	oxysterol binding	http://amigo.geneontology.org/amigo/term/GO:0008142	1	1128	5	16560	2.93789	1880	GPR183	0.326613	0.485966	0.676962
GO:0004046	aminoacylase activity	http://amigo.geneontology.org/amigo/term/GO:0004046	1	1128	5	16560	2.93789	847	CAT	0.326613	0.485966	0.676962
GO:0031404	chloride ion binding	http://amigo.geneontology.org/amigo/term/GO:0031404	1	1128	5	16560	2.93789	1636	ACE	0.326613	0.485966	0.676962
GO:0047184	1-acylglycerophosphocholine O-acyltransferase activity	http://amigo.geneontology.org/amigo/term/GO:0047184	1	1128	5	16560	2.93789	54947	LPCAT2	0.326613	0.485966	0.676962
GO:0008484	sulfuric ester hydrolase activity	http://amigo.geneontology.org/amigo/term/GO:0008484	1	1128	5	16560	2.93789	2799	GNS	0.326613	0.485966	0.676962
GO:0043426	MRF binding	http://amigo.geneontology.org/amigo/term/GO:0043426	1	1128	5	16560	2.93789	1831	TSC22D3	0.326613	0.485966	0.676962
GO:0030911	TPR domain binding	http://amigo.geneontology.org/amigo/term/GO:0030911	1	1128	5	16560	2.93789	51762	RAB8B	0.326613	0.485966	0.676962
GO:0019957	C-C chemokine binding	http://amigo.geneontology.org/amigo/term/GO:0019957	1	1128	5	16560	2.93789	1230	CCR1	0.326613	0.485966	0.676962
GO:0086008	voltage-gated potassium channel activity involved in cardiac muscle cell action potential repolarization	http://amigo.geneontology.org/amigo/term/GO:0086008	1	1128	5	16560	2.93789	3759	KCNJ2	0.326613	0.485966	0.676962
GO:0005134	interleukin-2 receptor binding	http://amigo.geneontology.org/amigo/term/GO:0005134	1	1128	5	16560	2.93789	1893	ECM1	0.326613	0.485966	0.676962
GO:0001537	N-acetylgalactosamine 4-O-sulfotransferase activity	http://amigo.geneontology.org/amigo/term/GO:0001537	1	1128	5	16560	2.93789	50515	CHST11	0.326613	0.485966	0.676962
GO:0005004	GPI-linked ephrin receptor activity	http://amigo.geneontology.org/amigo/term/GO:0005004	1	1128	5	16560	2.93789	2042	EPHA3	0.326613	0.485966	0.676962
GO:0004945	angiotensin type II receptor activity	http://amigo.geneontology.org/amigo/term/GO:0004945	1	1128	5	16560	2.93789	185	AGTR1	0.326613	0.485966	0.676962
GO:0030618	transforming growth factor beta receptor, pathway-specific cytoplasmic mediator activity	http://amigo.geneontology.org/amigo/term/GO:0030618	1	1128	5	16560	2.93789	4086	SMAD1	0.326613	0.485966	0.676962
GO:0003828	alpha-N-acetylneuraminate alpha-2,8-sialyltransferase activity	http://amigo.geneontology.org/amigo/term/GO:0003828	1	1128	5	16560	2.93789	7903	ST8SIA4	0.326613	0.485966	0.676962
GO:0008823	cupric reductase activity	http://amigo.geneontology.org/amigo/term/GO:0008823	1	1128	5	16560	2.93789	26872	STEAP1	0.326613	0.485966	0.676962
GO:0004331	fructose-2,6-bisphosphate 2-phosphatase activity	http://amigo.geneontology.org/amigo/term/GO:0004331	1	1128	5	16560	2.93789	57103	TIGAR	0.326613	0.485966	0.676962
GO:0030884	exogenous lipid antigen binding	http://amigo.geneontology.org/amigo/term/GO:0030884	1	1128	5	16560	2.93789	911	CD1C	0.326613	0.485966	0.676962
GO:1990405	protein antigen binding	http://amigo.geneontology.org/amigo/term/GO:1990405	1	1128	5	16560	2.93789	3824	KLRD1	0.326613	0.485966	0.676962
GO:0046934	phosphatidylinositol-4,5-bisphosphate 3-kinase activity	http://amigo.geneontology.org/amigo/term/GO:0046934	1	1128	5	16560	2.93789	5294	PIK3CG	0.326613	0.485966	0.676962
GO:0030284	estrogen receptor activity	http://amigo.geneontology.org/amigo/term/GO:0030284	1	1128	5	16560	2.93789	51176	LEF1	0.326613	0.485966	0.676962
GO:0022843	voltage-gated cation channel activity	http://amigo.geneontology.org/amigo/term/GO:0022843	1	1128	5	16560	2.93789	84329	HVCN1	0.326613	0.485966	0.676962
GO:0035004	phosphatidylinositol 3-kinase activity	http://amigo.geneontology.org/amigo/term/GO:0035004	1	1128	5	16560	2.93789	5294	PIK3CG	0.326613	0.485966	0.676962
GO:0031694	alpha-2A adrenergic receptor binding	http://amigo.geneontology.org/amigo/term/GO:0031694	1	1128	5	16560	2.93789	7345	UCHL1	0.326613	0.485966	0.676962
GO:0016176	superoxide-generating NADPH oxidase activator activity	http://amigo.geneontology.org/amigo/term/GO:0016176	1	1128	5	16560	2.93789	4689	NCF4	0.326613	0.485966	0.676962
GO:0061133	endopeptidase activator activity	http://amigo.geneontology.org/amigo/term/GO:0061133	1	1128	5	16560	2.93789	6423	SFRP2	0.326613	0.485966	0.676962
GO:0004083	bisphosphoglycerate 2-phosphatase activity	http://amigo.geneontology.org/amigo/term/GO:0004083	1	1128	5	16560	2.93789	57103	TIGAR	0.326613	0.485966	0.676962
GO:0071253	connexin binding	http://amigo.geneontology.org/amigo/term/GO:0071253	1	1128	5	16560	2.93789	2697	GJA1	0.326613	0.485966	0.676962
GO:0000287	magnesium ion binding	http://amigo.geneontology.org/amigo/term/GO:0000287	15	1128	190	16560	1.16116	5205;8444;5728;54974;58484;9943;64077;56952;11329;23413;10783;25;3418;7153;27	ATP8B1;DYRK3;PTEN;THG1L;NLRC4;OXSR1;LHPP;PRTFDC1;STK38;NCS1;NEK6;ABL1;IDH2;TOP2A;ABL2	0.328533	0.483421	0.676962
GO:0008013	beta-catenin binding	http://amigo.geneontology.org/amigo/term/GO:0008013	6	1128	68	16560	1.29695	51176;1003;1000;5796;30851;7414	LEF1;CDH5;CDH2;PTPRK;TAX1BP3;VCL	0.333055	0.477484	0.676962
GO:0045296	cadherin binding	http://amigo.geneontology.org/amigo/term/GO:0045296	3	1128	29	16560	1.52009	1499;1012;7414	CTNNB1;CDH13;VCL	0.334607	0.475465	0.676962
GO:0005544	calcium-dependent phospholipid binding	http://amigo.geneontology.org/amigo/term/GO:0005544	5	1128	55	16560	1.33611	5321;54843;79772;9847;302	PLA2G4A;SYTL2;MCTP1;C2CD5;ANXA2	0.335989	0.473675	0.676962
GO:0031489	myosin V binding	http://amigo.geneontology.org/amigo/term/GO:0031489	2	1128	17	16560	1.72845	10890;5874	RAB10;RAB27B	0.344062	0.463363	0.676962
GO:0070273	phosphatidylinositol-4-phosphate binding	http://amigo.geneontology.org/amigo/term/GO:0070273	2	1128	17	16560	1.72845	285590;54477	SH3PXD2B;PLEKHA5	0.344062	0.463363	0.676962
GO:0004540	ribonuclease activity	http://amigo.geneontology.org/amigo/term/GO:0004540	2	1128	17	16560	1.72845	6039;8635	RNASE6;RNASET2	0.344062	0.463363	0.676962
GO:0005123	death receptor binding	http://amigo.geneontology.org/amigo/term/GO:0005123	2	1128	17	16560	1.72845	637;4615	BID;MYD88	0.344062	0.463363	0.676962
GO:0030742	GTP-dependent protein binding	http://amigo.geneontology.org/amigo/term/GO:0030742	2	1128	17	16560	1.72845	10981;998	RAB32;CDC42	0.344062	0.463363	0.676962
GO:0043621	protein self-association	http://amigo.geneontology.org/amigo/term/GO:0043621	4	1128	43	16560	1.36696	7128;6352;5745;1508	TNFAIP3;CCL5;PTH1R;CTSB	0.352038	0.45341	0.676962
GO:0008047	enzyme activator activity	http://amigo.geneontology.org/amigo/term/GO:0008047	4	1128	43	16560	1.36696	4325;5476;241;9535	MMP16;CTSA;ALOX5AP;GMFG	0.352038	0.45341	0.676962
GO:0004864	protein phosphatase inhibitor activity	http://amigo.geneontology.org/amigo/term/GO:0004864	3	1128	30	16560	1.46933	26472;5764;84687	PPP1R14B;PTN;PPP1R9B	0.35244	0.452915	0.676962
GO:0008378	galactosyltransferase activity	http://amigo.geneontology.org/amigo/term/GO:0008378	2	1128	18	16560	1.63233	10678;9334	B3GNT2;B4GALT5	0.367675	0.434536	0.676962
GO:0004950	chemokine receptor activity	http://amigo.geneontology.org/amigo/term/GO:0004950	2	1128	18	16560	1.63233	1240;1230	CMKLR1;CCR1	0.367675	0.434536	0.676962
GO:0008656	cysteine-type endopeptidase activator activity involved in apoptotic process	http://amigo.geneontology.org/amigo/term/GO:0008656	2	1128	18	16560	1.63233	834;51065	CASP1;RPS27L	0.367675	0.434536	0.676962
GO:0048037	cofactor binding	http://amigo.geneontology.org/amigo/term/GO:0048037	2	1128	18	16560	1.63233	7298;7390	TYMS;UROS	0.367675	0.434536	0.676962
GO:0030332	cyclin binding	http://amigo.geneontology.org/amigo/term/GO:0030332	2	1128	18	16560	1.63233	1026;1021	CDKN1A;CDK6	0.367675	0.434536	0.676962
GO:0031625	ubiquitin protein ligase binding	http://amigo.geneontology.org/amigo/term/GO:0031625	19	1128	252	16560	1.10872	3091;7334;409;7384;1026;7345;9627;4281;6790;637;11065;28951;7167;3301;5898;29089;203068;7414;7852	HIF1A;UBE2N;ARRB2;UQCRC1;CDKN1A;UCHL1;SNCAIP;MID1;AURKA;BID;UBE2C;TRIB2;TPI1;DNAJA1;RALA;UBE2T;TUBB;VCL;CXCR4	0.36807	0.43407	0.676962
GO:0004630	phospholipase D activity	http://amigo.geneontology.org/amigo/term/GO:0004630	1	1128	6	16560	2.44809	3162	HMOX1	0.369571	0.432302	0.676962
GO:0015193	L-proline transmembrane transporter activity	http://amigo.geneontology.org/amigo/term/GO:0015193	1	1128	6	16560	2.44809	206358	SLC36A1	0.369571	0.432302	0.676962
GO:0031730	CCR5 chemokine receptor binding	http://amigo.geneontology.org/amigo/term/GO:0031730	1	1128	6	16560	2.44809	6352	CCL5	0.369571	0.432302	0.676962
GO:0032405	MutLalpha complex binding	http://amigo.geneontology.org/amigo/term/GO:0032405	1	1128	6	16560	2.44809	5111	PCNA	0.369571	0.432302	0.676962
GO:0004553	hydrolase activity, hydrolyzing O-glycosyl compounds	http://amigo.geneontology.org/amigo/term/GO:0004553	1	1128	6	16560	2.44809	197021	LCTL	0.369571	0.432302	0.676962
GO:0004322	ferroxidase activity	http://amigo.geneontology.org/amigo/term/GO:0004322	1	1128	6	16560	2.44809	2495	FTH1	0.369571	0.432302	0.676962
GO:0008131	primary amine oxidase activity	http://amigo.geneontology.org/amigo/term/GO:0008131	1	1128	6	16560	2.44809	314	AOC2	0.369571	0.432302	0.676962
GO:0047035	testosterone dehydrogenase (NAD+) activity	http://amigo.geneontology.org/amigo/term/GO:0047035	1	1128	6	16560	2.44809	8644	AKR1C3	0.369571	0.432302	0.676962
GO:0071723	lipopeptide binding	http://amigo.geneontology.org/amigo/term/GO:0071723	1	1128	6	16560	2.44809	911	CD1C	0.369571	0.432302	0.676962
GO:0015271	outward rectifier potassium channel activity	http://amigo.geneontology.org/amigo/term/GO:0015271	1	1128	6	16560	2.44809	3776	KCNK2	0.369571	0.432302	0.676962
GO:0055131	C3HC4-type RING finger domain binding	http://amigo.geneontology.org/amigo/term/GO:0055131	1	1128	6	16560	2.44809	3301	DNAJA1	0.369571	0.432302	0.676962
GO:0003854	3-beta-hydroxy-delta5-steroid dehydrogenase activity	http://amigo.geneontology.org/amigo/term/GO:0003854	1	1128	6	16560	2.44809	80270	HSD3B7	0.369571	0.432302	0.676962
GO:0008510	sodium:bicarbonate symporter activity	http://amigo.geneontology.org/amigo/term/GO:0008510	1	1128	6	16560	2.44809	57282	SLC4A10	0.369571	0.432302	0.676962
GO:0004969	histamine receptor activity	http://amigo.geneontology.org/amigo/term/GO:0004969	1	1128	6	16560	2.44809	3274	HRH2	0.369571	0.432302	0.676962
GO:0005168	neurotrophin TRKA receptor binding	http://amigo.geneontology.org/amigo/term/GO:0005168	1	1128	6	16560	2.44809	2885	GRB2	0.369571	0.432302	0.676962
GO:0004035	alkaline phosphatase activity	http://amigo.geneontology.org/amigo/term/GO:0004035	1	1128	6	16560	2.44809	249	ALPL	0.369571	0.432302	0.676962
GO:0000774	adenyl-nucleotide exchange factor activity	http://amigo.geneontology.org/amigo/term/GO:0000774	1	1128	6	16560	2.44809	5216	PFN1	0.369571	0.432302	0.676962
GO:0035174	histone serine kinase activity	http://amigo.geneontology.org/amigo/term/GO:0035174	1	1128	6	16560	2.44809	6790	AURKA	0.369571	0.432302	0.676962
GO:0004111	creatine kinase activity	http://amigo.geneontology.org/amigo/term/GO:0004111	1	1128	6	16560	2.44809	9448	MAP4K4	0.369571	0.432302	0.676962
GO:0015467	G-protein activated inward rectifier potassium channel activity	http://amigo.geneontology.org/amigo/term/GO:0015467	1	1128	6	16560	2.44809	3762	KCNJ5	0.369571	0.432302	0.676962
GO:0036374	glutathione hydrolase activity	http://amigo.geneontology.org/amigo/term/GO:0036374	1	1128	6	16560	2.44809	2687	GGT5	0.369571	0.432302	0.676962
GO:0047372	acylglycerol lipase activity	http://amigo.geneontology.org/amigo/term/GO:0047372	1	1128	6	16560	2.44809	57406	ABHD6	0.369571	0.432302	0.676962
GO:0055102	lipase inhibitor activity	http://amigo.geneontology.org/amigo/term/GO:0055102	1	1128	6	16560	2.44809	341	APOC1	0.369571	0.432302	0.676962
GO:0031726	CCR1 chemokine receptor binding	http://amigo.geneontology.org/amigo/term/GO:0031726	1	1128	6	16560	2.44809	6352	CCL5	0.369571	0.432302	0.676962
GO:0043184	vascular endothelial growth factor receptor 2 binding	http://amigo.geneontology.org/amigo/term/GO:0043184	1	1128	6	16560	2.44809	3690	ITGB3	0.369571	0.432302	0.676962
GO:0017111	nucleoside-triphosphatase activity	http://amigo.geneontology.org/amigo/term/GO:0017111	1	1128	6	16560	2.44809	953	ENTPD1	0.369571	0.432302	0.676962
GO:0060228	phosphatidylcholine-sterol O-acyltransferase activator activity	http://amigo.geneontology.org/amigo/term/GO:0060228	1	1128	6	16560	2.44809	341	APOC1	0.369571	0.432302	0.676962
GO:0004030	aldehyde dehydrogenase [NAD(P)+] activity	http://amigo.geneontology.org/amigo/term/GO:0004030	1	1128	6	16560	2.44809	221	ALDH3B1	0.369571	0.432302	0.676962
GO:0072341	modified amino acid binding	http://amigo.geneontology.org/amigo/term/GO:0072341	1	1128	6	16560	2.44809	50507	NOX4	0.369571	0.432302	0.676962
GO:0004064	arylesterase activity	http://amigo.geneontology.org/amigo/term/GO:0004064	1	1128	6	16560	2.44809	57136	APMAP	0.369571	0.432302	0.676962
GO:0017080	sodium channel regulator activity	http://amigo.geneontology.org/amigo/term/GO:0017080	3	1128	31	16560	1.42185	7533;6446;23327	YWHAH;SGK1;NEDD4L	0.370214	0.431548	0.676962
GO:0042605	peptide antigen binding	http://amigo.geneontology.org/amigo/term/GO:0042605	3	1128	31	16560	1.42185	3122;8140;3127	HLA-DRA;SLC7A5;HLA-DRB5	0.370214	0.431548	0.676962
GO:0004714	transmembrane receptor protein tyrosine kinase activity	http://amigo.geneontology.org/amigo/term/GO:0004714	3	1128	31	16560	1.42185	4916;4919;3791	NTRK3;ROR1;KDR	0.370214	0.431548	0.676962
GO:0005158	insulin receptor binding	http://amigo.geneontology.org/amigo/term/GO:0005158	3	1128	31	16560	1.42185	55816;9046;3479	DOK5;DOK2;IGF1	0.370214	0.431548	0.676962
GO:0003725	double-stranded RNA binding	http://amigo.geneontology.org/amigo/term/GO:0003725	5	1128	58	16560	1.26677	23180;4939;4938;87;51311	RFTN1;OAS2;OAS1;ACTN1;TLR8	0.374637	0.426389	0.677213
GO:0004866	endopeptidase inhibitor activity	http://amigo.geneontology.org/amigo/term/GO:0004866	3	1128	32	16560	1.37733	1476;1471;6691	CSTB;CST3;SPINK2	0.387895	0.411286	0.677213
GO:0004693	cyclin-dependent protein serine/threonine kinase activity	http://amigo.geneontology.org/amigo/term/GO:0004693	3	1128	32	16560	1.37733	1021;1020;983	CDK6;CDK5;CDK1	0.387895	0.411286	0.677213
GO:0048487	beta-tubulin binding	http://amigo.geneontology.org/amigo/term/GO:0048487	3	1128	32	16560	1.37733	22948;5997;29127	CCT5;RGS2;RACGAP1	0.387895	0.411286	0.677213
GO:0071889	14-3-3 protein binding	http://amigo.geneontology.org/amigo/term/GO:0071889	2	1128	19	16560	1.54632	409;54541	ARRB2;DDIT4	0.390947	0.407882	0.677213
GO:0018024	histone-lysine N-methyltransferase activity	http://amigo.geneontology.org/amigo/term/GO:0018024	2	1128	19	16560	1.54632	2146;93166	EZH2;PRDM6	0.390947	0.407882	0.677213
GO:0043015	gamma-tubulin binding	http://amigo.geneontology.org/amigo/term/GO:0043015	2	1128	19	16560	1.54632	29127;9638	RACGAP1;FEZ1	0.390947	0.407882	0.677213
GO:0009055	electron carrier activity	http://amigo.geneontology.org/amigo/term/GO:0009055	7	1128	87	16560	1.18235	50507;55967;1536;8309;314;4200;51022	NOX4;NDUFA12;CYBB;ACOX2;AOC2;ME2;GLRX2	0.392707	0.405931	0.677213
GO:0008236	serine-type peptidase activity	http://amigo.geneontology.org/amigo/term/GO:0008236	5	1128	60	16560	1.2244	2191;1803;715;7177;1200	FAP;DPP4;C1R;TPSAB1;TPP1	0.400412	0.397493	0.677213
GO:0004364	glutathione transferase activity	http://amigo.geneontology.org/amigo/term/GO:0004364	3	1128	33	16560	1.33552	1192;241;4257	CLIC1;ALOX5AP;MGST1	0.405453	0.39206	0.677213
GO:0001758	retinal dehydrogenase activity	http://amigo.geneontology.org/amigo/term/GO:0001758	1	1128	7	16560	2.09824	8644	AKR1C3	0.409791	0.387438	0.677213
GO:0036312	phosphatidylinositol 3-kinase regulatory subunit binding	http://amigo.geneontology.org/amigo/term/GO:0036312	1	1128	7	16560	2.09824	118788	PIK3AP1	0.409791	0.387438	0.677213
GO:0051861	glycolipid binding	http://amigo.geneontology.org/amigo/term/GO:0051861	1	1128	7	16560	2.09824	911	CD1C	0.409791	0.387438	0.677213
GO:0008349	MAP kinase kinase kinase kinase activity	http://amigo.geneontology.org/amigo/term/GO:0008349	1	1128	7	16560	2.09824	9448	MAP4K4	0.409791	0.387438	0.677213
GO:0032036	myosin heavy chain binding	http://amigo.geneontology.org/amigo/term/GO:0032036	1	1128	7	16560	2.09824	10398	MYL9	0.409791	0.387438	0.677213
GO:0004908	interleukin-1 receptor activity	http://amigo.geneontology.org/amigo/term/GO:0004908	1	1128	7	16560	2.09824	3554	IL1R1	0.409791	0.387438	0.677213
GO:0004028	3-chloroallyl aldehyde dehydrogenase activity	http://amigo.geneontology.org/amigo/term/GO:0004028	1	1128	7	16560	2.09824	221	ALDH3B1	0.409791	0.387438	0.677213
GO:0008121	ubiquinol-cytochrome-c reductase activity	http://amigo.geneontology.org/amigo/term/GO:0008121	1	1128	7	16560	2.09824	7384	UQCRC1	0.409791	0.387438	0.677213
GO:0008227	G-protein coupled amine receptor activity	http://amigo.geneontology.org/amigo/term/GO:0008227	1	1128	7	16560	2.09824	23432	GPR161	0.409791	0.387438	0.677213
GO:0008329	signaling pattern recognition receptor activity	http://amigo.geneontology.org/amigo/term/GO:0008329	1	1128	7	16560	2.09824	8685	MARCO	0.409791	0.387438	0.677213
GO:0016494	C-X-C chemokine receptor activity	http://amigo.geneontology.org/amigo/term/GO:0016494	1	1128	7	16560	2.09824	7852	CXCR4	0.409791	0.387438	0.677213
GO:0003680	AT DNA binding	http://amigo.geneontology.org/amigo/term/GO:0003680	1	1128	7	16560	2.09824	1396	CRIP1	0.409791	0.387438	0.677213
GO:0097200	cysteine-type endopeptidase activity involved in execution phase of apoptosis	http://amigo.geneontology.org/amigo/term/GO:0097200	1	1128	7	16560	2.09824	834	CASP1	0.409791	0.387438	0.677213
GO:0017081	chloride channel regulator activity	http://amigo.geneontology.org/amigo/term/GO:0017081	1	1128	7	16560	2.09824	6446	SGK1	0.409791	0.387438	0.677213
GO:0050291	sphingosine N-acyltransferase activity	http://amigo.geneontology.org/amigo/term/GO:0050291	1	1128	7	16560	2.09824	253782	CERS6	0.409791	0.387438	0.677213
GO:0004887	thyroid hormone receptor activity	http://amigo.geneontology.org/amigo/term/GO:0004887	1	1128	7	16560	2.09824	8013	NR4A3	0.409791	0.387438	0.677213
GO:0004726	non-membrane spanning protein tyrosine phosphatase activity	http://amigo.geneontology.org/amigo/term/GO:0004726	1	1128	7	16560	2.09824	1843	DUSP1	0.409791	0.387438	0.677213
GO:0004767	sphingomyelin phosphodiesterase activity	http://amigo.geneontology.org/amigo/term/GO:0004767	1	1128	7	16560	2.09824	55512	SMPD3	0.409791	0.387438	0.677213
GO:0008517	folic acid transporter activity	http://amigo.geneontology.org/amigo/term/GO:0008517	1	1128	7	16560	2.09824	2350	FOLR2	0.409791	0.387438	0.677213
GO:0004032	alditol:NADP+ 1-oxidoreductase activity	http://amigo.geneontology.org/amigo/term/GO:0004032	1	1128	7	16560	2.09824	8644	AKR1C3	0.409791	0.387438	0.677213
GO:0015450	P-P-bond-hydrolysis-driven protein transmembrane transporter activity	http://amigo.geneontology.org/amigo/term/GO:0015450	1	1128	7	16560	2.09824	23480	SEC61G	0.409791	0.387438	0.677213
GO:0004000	adenosine deaminase activity	http://amigo.geneontology.org/amigo/term/GO:0004000	1	1128	7	16560	2.09824	51816	CECR1	0.409791	0.387438	0.677213
GO:0019208	phosphatase regulator activity	http://amigo.geneontology.org/amigo/term/GO:0019208	1	1128	7	16560	2.09824	55589	BMP2K	0.409791	0.387438	0.677213
GO:0015180	L-alanine transmembrane transporter activity	http://amigo.geneontology.org/amigo/term/GO:0015180	1	1128	7	16560	2.09824	206358	SLC36A1	0.409791	0.387438	0.677213
GO:0019206	nucleoside kinase activity	http://amigo.geneontology.org/amigo/term/GO:0019206	1	1128	7	16560	2.09824	26289	AK5	0.409791	0.387438	0.677213
GO:0004931	extracellular ATP-gated cation channel activity	http://amigo.geneontology.org/amigo/term/GO:0004931	1	1128	7	16560	2.09824	5027	P2RX7	0.409791	0.387438	0.677213
GO:0030274	LIM domain binding	http://amigo.geneontology.org/amigo/term/GO:0030274	1	1128	7	16560	2.09824	9079	LDB2	0.409791	0.387438	0.677213
GO:0000975	regulatory region DNA binding	http://amigo.geneontology.org/amigo/term/GO:0000975	1	1128	7	16560	2.09824	4790	NFKB1	0.409791	0.387438	0.677213
GO:0001614	purinergic nucleotide receptor activity	http://amigo.geneontology.org/amigo/term/GO:0001614	1	1128	7	16560	2.09824	5027	P2RX7	0.409791	0.387438	0.677213
GO:0008889	glycerophosphodiester phosphodiesterase activity	http://amigo.geneontology.org/amigo/term/GO:0008889	1	1128	7	16560	2.09824	51573	GDE1	0.409791	0.387438	0.677213
GO:0008821	crossover junction endodeoxyribonuclease activity	http://amigo.geneontology.org/amigo/term/GO:0008821	1	1128	7	16560	2.09824	348654	GEN1	0.409791	0.387438	0.677213
GO:0043548	phosphatidylinositol 3-kinase binding	http://amigo.geneontology.org/amigo/term/GO:0043548	2	1128	20	16560	1.46892	2534;5159	FYN;PDGFRB	0.413825	0.383183	0.677518
GO:0005545	1-phosphatidylinositol binding	http://amigo.geneontology.org/amigo/term/GO:0005545	2	1128	20	16560	1.46892	29887;54477	SNX10;PLEKHA5	0.413825	0.383183	0.677518
GO:0080025	phosphatidylinositol-3,5-bisphosphate binding	http://amigo.geneontology.org/amigo/term/GO:0080025	2	1128	20	16560	1.46892	285590;54477	SH3PXD2B;PLEKHA5	0.413825	0.383183	0.677518
GO:0043325	phosphatidylinositol-3,4-bisphosphate binding	http://amigo.geneontology.org/amigo/term/GO:0043325	2	1128	20	16560	1.46892	55803;5341	ADAP2;PLEK	0.413825	0.383183	0.677518
GO:0019894	kinesin binding	http://amigo.geneontology.org/amigo/term/GO:0019894	3	1128	34	16560	1.29616	9639;23207;10783	ARHGEF10;PLEKHM2;NEK6	0.422858	0.373805	0.681642
GO:0048020	CCR chemokine receptor binding	http://amigo.geneontology.org/amigo/term/GO:0048020	2	1128	21	16560	1.39888	6357;6376	CCL13;CX3CL1	0.436265	0.36025	0.681642
GO:0031210	phosphatidylcholine binding	http://amigo.geneontology.org/amigo/term/GO:0031210	2	1128	21	16560	1.39888	341;5104	APOC1;SERPINA5	0.436265	0.36025	0.681642
GO:0051020	GTPase binding	http://amigo.geneontology.org/amigo/term/GO:0051020	2	1128	21	16560	1.39888	3936;6711	LCP1;SPTBN1	0.436265	0.36025	0.681642
GO:0031418	L-ascorbic acid binding	http://amigo.geneontology.org/amigo/term/GO:0031418	2	1128	21	16560	1.39888	64175;5351	P3H1;PLOD1	0.436265	0.36025	0.681642
GO:0004298	threonine-type endopeptidase activity	http://amigo.geneontology.org/amigo/term/GO:0004298	2	1128	21	16560	1.39888	5685;5687	PSMA4;PSMA6	0.436265	0.36025	0.681642
GO:0051219	phosphoprotein binding	http://amigo.geneontology.org/amigo/term/GO:0051219	3	1128	35	16560	1.25905	6714;4281;5327	SRC;MID1;PLAT	0.440086	0.356463	0.681642
GO:0016787	hydrolase activity	http://amigo.geneontology.org/amigo/term/GO:0016787	7	1128	92	16560	1.11775	30846;4232;5168;57089;79887;114294;58489	EHD2;MEST;ENPP2;ENTPD7;PLBD1;LACTB;ABHD17C	0.445641	0.351015	0.681642
GO:0019887	protein kinase regulator activity	http://amigo.geneontology.org/amigo/term/GO:0019887	1	1128	8	16560	1.83585	5880	RAC2	0.447447	0.349259	0.681642
GO:0042805	actinin binding	http://amigo.geneontology.org/amigo/term/GO:0042805	1	1128	8	16560	1.83585	4790	NFKB1	0.447447	0.349259	0.681642
GO:0008046	axon guidance receptor activity	http://amigo.geneontology.org/amigo/term/GO:0008046	1	1128	8	16560	1.83585	9037	SEMA5A	0.447447	0.349259	0.681642
GO:0015179	L-amino acid transmembrane transporter activity	http://amigo.geneontology.org/amigo/term/GO:0015179	1	1128	8	16560	1.83585	9056	SLC7A7	0.447447	0.349259	0.681642
GO:0031957	very long-chain fatty acid-CoA ligase activity	http://amigo.geneontology.org/amigo/term/GO:0031957	1	1128	8	16560	1.83585	11000	SLC27A3	0.447447	0.349259	0.681642
GO:0015194	L-serine transmembrane transporter activity	http://amigo.geneontology.org/amigo/term/GO:0015194	1	1128	8	16560	1.83585	256987	SERINC5	0.447447	0.349259	0.681642
GO:0035612	AP-2 adaptor complex binding	http://amigo.geneontology.org/amigo/term/GO:0035612	1	1128	8	16560	1.83585	10981	RAB32	0.447447	0.349259	0.681642
GO:0004859	phospholipase inhibitor activity	http://amigo.geneontology.org/amigo/term/GO:0004859	1	1128	8	16560	1.83585	341	APOC1	0.447447	0.349259	0.681642
GO:0034452	dynactin binding	http://amigo.geneontology.org/amigo/term/GO:0034452	1	1128	8	16560	1.83585	58533	SNX6	0.447447	0.349259	0.681642
GO:0004571	mannosyl-oligosaccharide 1,2-alpha-mannosidase activity	http://amigo.geneontology.org/amigo/term/GO:0004571	1	1128	8	16560	1.83585	4121	MAN1A1	0.447447	0.349259	0.681642
GO:0045499	chemorepellent activity	http://amigo.geneontology.org/amigo/term/GO:0045499	1	1128	8	16560	1.83585	9353	SLIT2	0.447447	0.349259	0.681642
GO:0004383	guanylate cyclase activity	http://amigo.geneontology.org/amigo/term/GO:0004383	1	1128	8	16560	1.83585	2983	GUCY1B3	0.447447	0.349259	0.681642
GO:0004017	adenylate kinase activity	http://amigo.geneontology.org/amigo/term/GO:0004017	1	1128	8	16560	1.83585	26289	AK5	0.447447	0.349259	0.681642
GO:0016655	oxidoreductase activity, acting on NAD(P)H, quinone or similar compound as acceptor	http://amigo.geneontology.org/amigo/term/GO:0016655	1	1128	8	16560	1.83585	8644	AKR1C3	0.447447	0.349259	0.681642
GO:0004415	hyalurononglucosaminidase activity	http://amigo.geneontology.org/amigo/term/GO:0004415	1	1128	8	16560	1.83585	960	CD44	0.447447	0.349259	0.681642
GO:0031402	sodium ion binding	http://amigo.geneontology.org/amigo/term/GO:0031402	1	1128	8	16560	1.83585	6335	SCN9A	0.447447	0.349259	0.681642
GO:0047498	calcium-dependent phospholipase A2 activity	http://amigo.geneontology.org/amigo/term/GO:0047498	1	1128	8	16560	1.83585	5321	PLA2G4A	0.447447	0.349259	0.681642
GO:0008035	high-density lipoprotein particle binding	http://amigo.geneontology.org/amigo/term/GO:0008035	1	1128	8	16560	1.83585	948	CD36	0.447447	0.349259	0.681642
GO:0046920	alpha-(1->3)-fucosyltransferase activity	http://amigo.geneontology.org/amigo/term/GO:0046920	1	1128	8	16560	1.83585	170384	FUT11	0.447447	0.349259	0.681642
GO:0004620	phospholipase activity	http://amigo.geneontology.org/amigo/term/GO:0004620	1	1128	8	16560	1.83585	57406	ABHD6	0.447447	0.349259	0.681642
GO:0070182	DNA polymerase binding	http://amigo.geneontology.org/amigo/term/GO:0070182	1	1128	8	16560	1.83585	5111	PCNA	0.447447	0.349259	0.681642
GO:0004865	protein serine/threonine phosphatase inhibitor activity	http://amigo.geneontology.org/amigo/term/GO:0004865	1	1128	8	16560	1.83585	81706	PPP1R14C	0.447447	0.349259	0.681642
GO:0033130	acetylcholine receptor binding	http://amigo.geneontology.org/amigo/term/GO:0033130	1	1128	8	16560	1.83585	1742	DLG4	0.447447	0.349259	0.681642
GO:0008553	hydrogen-exporting ATPase activity, phosphorylative mechanism	http://amigo.geneontology.org/amigo/term/GO:0008553	1	1128	8	16560	1.83585	9114	ATP6V0D1	0.447447	0.349259	0.681642
GO:0005524	ATP binding	http://amigo.geneontology.org/amigo/term/GO:0005524	101	1128	1458	16560	1.01866	59;5205;81930;5756;7334;8444;22948;526;2042;54974;9201;4627;6714;7046;89795;5594;58484;10051;953;30811;9943;10060;114548;6790;4430;7786;6793;53354;1021;9775;9262;10112;55589;6446;4363;283459;2534;5159;4916;340273;30846;11065;1020;4643;94;26289;2180;11329;860;4671;5027;5287;4629;3984;10783;4628;658;983;3301;1436;3656;4939;4645;113;817;4919;55636;29089;10808;55083;4651;4646;79834;54899;3611;50640;1…	ACTA2;ATP8B1;KIF18A;TWF1;UBE2N;DYRK3;CCT5;ATP6V1B2;EPHA3;THG1L;DCLK1;MYH9;SRC;TGFBR1;NAV3;MAPK1;NLRC4;SMC4;ENTPD1;HUNK;OXSR1;ABCC9;NLRP3;AURKA;MYO1B;MAP3K12;STK10;PANK1;CDK6;EIF4A3;STK17B;KIF20A;BMP2K;SGK1;ABCC1;GATC;FYN;PDGFRB;NTRK3;ABCB5;EHD2;UBE2C;CDK5;MYO1E;ACVRL1;AK5;ACSL1;STK38;RUNX2;NAIP;P2RX7;PIK3C2B;MYH11;LIMK1;NEK6;MYH10;BMPR1B;CDK1;DNAJA1;CSF1R;IRAK2;OAS2;MYO5B;ADCY7;CAMK2D;ROR1;CHD7;U…	0.448296	0.348436	0.681642
GO:0008022	protein C-terminus binding	http://amigo.geneontology.org/amigo/term/GO:0008022	13	1128	179	16560	1.06698	1742;1499;1063;389136;1893;8655;3839;3339;10516;54899;30851;25;7153	DLG4;CTNNB1;CENPF;VGLL3;ECM1;DYNLL1;KPNA3;HSPG2;FBLN5;PXK;TAX1BP3;ABL1;TOP2A	0.452953	0.343947	0.687238
GO:0015171	amino acid transmembrane transporter activity	http://amigo.geneontology.org/amigo/term/GO:0015171	2	1128	22	16560	1.33522	8140;145389	SLC7A5;SLC38A6	0.458229	0.338918	0.69226
GO:0003756	protein disulfide isomerase activity	http://amigo.geneontology.org/amigo/term/GO:0003756	2	1128	22	16560	1.33522	3690;51022	ITGB3;GLRX2	0.458229	0.338918	0.69226
GO:0003690	double-stranded DNA binding	http://amigo.geneontology.org/amigo/term/GO:0003690	7	1128	94	16560	1.09384	1499;4790;3428;2353;2354;3725;1316	CTNNB1;NFKB1;IFI16;FOS;FOSB;JUN;KLF6	0.466619	0.331038	0.69514
GO:0001664	G-protein coupled receptor binding	http://amigo.geneontology.org/amigo/term/GO:0001664	4	1128	51	16560	1.15198	409;2534;3301;1901	ARRB2;FYN;DNAJA1;S1PR1	0.468721	0.329085	0.69514
GO:0051537	2 iron, 2 sulfur cluster binding	http://amigo.geneontology.org/amigo/term/GO:0051537	2	1128	23	16560	1.27709	493856;51022	CISD2;GLRX2	0.479687	0.319042	0.69514
GO:0015035	protein disulfide oxidoreductase activity	http://amigo.geneontology.org/amigo/term/GO:0015035	2	1128	23	16560	1.27709	23166;51022	STAB1;GLRX2	0.479687	0.319042	0.69514
GO:0004190	aspartic-type endopeptidase activity	http://amigo.geneontology.org/amigo/term/GO:0004190	2	1128	23	16560	1.27709	10159;23621	ATP6AP2;BACE1	0.479687	0.319042	0.69514
GO:0030552	cAMP binding	http://amigo.geneontology.org/amigo/term/GO:0030552	2	1128	23	16560	1.27709	5139;10846	PDE3A;PDE10A	0.479687	0.319042	0.69514
GO:0035257	nuclear hormone receptor binding	http://amigo.geneontology.org/amigo/term/GO:0035257	2	1128	23	16560	1.27709	1499;3091	CTNNB1;HIF1A	0.479687	0.319042	0.69514
GO:0035615	clathrin adaptor activity	http://amigo.geneontology.org/amigo/term/GO:0035615	1	1128	9	16560	1.63177	161	AP2A2	0.482702	0.316321	0.69514
GO:0004438	phosphatidylinositol-3-phosphatase activity	http://amigo.geneontology.org/amigo/term/GO:0004438	1	1128	9	16560	1.63177	5728	PTEN	0.482702	0.316321	0.69514
GO:0008324	cation transmembrane transporter activity	http://amigo.geneontology.org/amigo/term/GO:0008324	1	1128	9	16560	1.63177	84102	SLC41A2	0.482702	0.316321	0.69514
GO:0051371	muscle alpha-actinin binding	http://amigo.geneontology.org/amigo/term/GO:0051371	1	1128	9	16560	1.63177	23022	PALLD	0.482702	0.316321	0.69514
GO:0045236	CXCR chemokine receptor binding	http://amigo.geneontology.org/amigo/term/GO:0045236	1	1128	9	16560	1.63177	6387	CXCL12	0.482702	0.316321	0.69514
GO:0031419	cobalamin binding	http://amigo.geneontology.org/amigo/term/GO:0031419	1	1128	9	16560	1.63177	6948	TCN2	0.482702	0.316321	0.69514
GO:0009881	photoreceptor activity	http://amigo.geneontology.org/amigo/term/GO:0009881	1	1128	9	16560	1.63177	23596	OPN3	0.482702	0.316321	0.69514
GO:0004716	receptor signaling protein tyrosine kinase activity	http://amigo.geneontology.org/amigo/term/GO:0004716	1	1128	9	16560	1.63177	3791	KDR	0.482702	0.316321	0.69514
GO:0015385	sodium:proton antiporter activity	http://amigo.geneontology.org/amigo/term/GO:0015385	1	1128	9	16560	1.63177	285195	SLC9A9	0.482702	0.316321	0.69514
GO:0036122	BMP binding	http://amigo.geneontology.org/amigo/term/GO:0036122	1	1128	9	16560	1.63177	2022	ENG	0.482702	0.316321	0.69514
GO:0005230	extracellular ligand-gated ion channel activity	http://amigo.geneontology.org/amigo/term/GO:0005230	1	1128	9	16560	1.63177	2561	GABRB2	0.482702	0.316321	0.69514
GO:0017153	sodium:dicarboxylate symporter activity	http://amigo.geneontology.org/amigo/term/GO:0017153	1	1128	9	16560	1.63177	6507	SLC1A3	0.482702	0.316321	0.69514
GO:0034713	type I transforming growth factor beta receptor binding	http://amigo.geneontology.org/amigo/term/GO:0034713	1	1128	9	16560	1.63177	2022	ENG	0.482702	0.316321	0.69514
GO:0035259	glucocorticoid receptor binding	http://amigo.geneontology.org/amigo/term/GO:0035259	1	1128	9	16560	1.63177	7533	YWHAH	0.482702	0.316321	0.69514
GO:0042054	histone methyltransferase activity	http://amigo.geneontology.org/amigo/term/GO:0042054	1	1128	9	16560	1.63177	2146	EZH2	0.482702	0.316321	0.69514
GO:0005254	chloride channel activity	http://amigo.geneontology.org/amigo/term/GO:0005254	4	1128	52	16560	1.12976	2561;80727;1192;55107	GABRB2;TTYH3;CLIC1;ANO1	0.482846	0.316192	0.69514
GO:0005543	phospholipid binding	http://amigo.geneontology.org/amigo/term/GO:0005543	6	1128	82	16560	1.07461	2152;5724;6711;1130;26509;1606	F3;PTAFR;SPTBN1;LYST;MYOF;DGKA	0.493818	0.306433	0.709485
GO:0005507	copper ion binding	http://amigo.geneontology.org/amigo/term/GO:0005507	4	1128	53	16560	1.10837	4015;9997;314;4016	LOX;SCO2;AOC2;LOXL1	0.496818	0.303802	0.710489
GO:0004181	metallocarboxypeptidase activity	http://amigo.geneontology.org/amigo/term/GO:0004181	2	1128	24	16560	1.2238	1359;56265	CPA3;CPXM1	0.500615	0.300496	0.710489
GO:0003840	gamma-glutamyltransferase activity	http://amigo.geneontology.org/amigo/term/GO:0003840	1	1128	10	16560	1.4685	2687	GGT5	0.51571	0.287595	0.710489
GO:0004115	3',5'-cyclic-AMP phosphodiesterase activity	http://amigo.geneontology.org/amigo/term/GO:0004115	1	1128	10	16560	1.4685	5139	PDE3A	0.51571	0.287595	0.710489
GO:0016595	glutamate binding	http://amigo.geneontology.org/amigo/term/GO:0016595	1	1128	10	16560	1.4685	6507	SLC1A3	0.51571	0.287595	0.710489
GO:0017128	phospholipid scramblase activity	http://amigo.geneontology.org/amigo/term/GO:0017128	1	1128	10	16560	1.4685	196527	ANO6	0.51571	0.287595	0.710489
GO:0008158	hedgehog receptor activity	http://amigo.geneontology.org/amigo/term/GO:0008158	1	1128	10	16560	1.4685	442213	PTCHD4	0.51571	0.287595	0.710489
GO:0008242	omega peptidase activity	http://amigo.geneontology.org/amigo/term/GO:0008242	1	1128	10	16560	1.4685	7345	UCHL1	0.51571	0.287595	0.710489
GO:0016709	oxidoreductase activity, acting on paired donors, with incorporation or reduction of molecular oxygen, NAD(P)H as one donor, and incorporation of one atom of oxygen	http://amigo.geneontology.org/amigo/term/GO:0016709	1	1128	10	16560	1.4685	9645	MICAL2	0.51571	0.287595	0.710489
GO:0051010	microtubule plus-end binding	http://amigo.geneontology.org/amigo/term/GO:0051010	1	1128	10	16560	1.4685	81930	KIF18A	0.51571	0.287595	0.710489
GO:0008199	ferric iron binding	http://amigo.geneontology.org/amigo/term/GO:0008199	1	1128	10	16560	1.4685	2495	FTH1	0.51571	0.287595	0.710489
GO:0051428	peptide hormone receptor binding	http://amigo.geneontology.org/amigo/term/GO:0051428	1	1128	10	16560	1.4685	2534	FYN	0.51571	0.287595	0.710489
GO:0046790	virion binding	http://amigo.geneontology.org/amigo/term/GO:0046790	1	1128	10	16560	1.4685	5806	PTX3	0.51571	0.287595	0.710489
GO:0005068	transmembrane receptor protein tyrosine kinase adaptor activity	http://amigo.geneontology.org/amigo/term/GO:0005068	1	1128	10	16560	1.4685	9046	DOK2	0.51571	0.287595	0.710489
GO:0004016	adenylate cyclase activity	http://amigo.geneontology.org/amigo/term/GO:0004016	1	1128	10	16560	1.4685	113	ADCY7	0.51571	0.287595	0.710489
GO:0015175	neutral amino acid transmembrane transporter activity	http://amigo.geneontology.org/amigo/term/GO:0015175	1	1128	10	16560	1.4685	8140	SLC7A5	0.51571	0.287595	0.710489
GO:0005391	sodium:potassium-exchanging ATPase activity	http://amigo.geneontology.org/amigo/term/GO:0005391	1	1128	10	16560	1.4685	483	ATP1B3	0.51571	0.287595	0.710489
GO:0000982	transcription factor activity, RNA polymerase II core promoter proximal region sequence-specific binding	http://amigo.geneontology.org/amigo/term/GO:0000982	1	1128	10	16560	1.4685	56938	ARNTL2	0.51571	0.287595	0.710489
GO:0070679	inositol 1,4,5 trisphosphate binding	http://amigo.geneontology.org/amigo/term/GO:0070679	1	1128	10	16560	1.4685	5334	PLCL1	0.51571	0.287595	0.710489
GO:0035240	dopamine binding	http://amigo.geneontology.org/amigo/term/GO:0035240	1	1128	10	16560	1.4685	3274	HRH2	0.51571	0.287595	0.710489
GO:0070016	armadillo repeat domain binding	http://amigo.geneontology.org/amigo/term/GO:0070016	1	1128	10	16560	1.4685	51176	LEF1	0.51571	0.287595	0.710489
GO:0035035	histone acetyltransferase binding	http://amigo.geneontology.org/amigo/term/GO:0035035	2	1128	25	16560	1.17478	3091;5111	HIF1A;PCNA	0.520992	0.283169	0.714967
GO:0004129	cytochrome-c oxidase activity	http://amigo.geneontology.org/amigo/term/GO:0004129	2	1128	25	16560	1.17478	388753;1528	COA6;CYB5A	0.520992	0.283169	0.714967
GO:0032947	protein complex scaffold	http://amigo.geneontology.org/amigo/term/GO:0032947	3	1128	40	16560	1.10133	409;9456;28956	ARRB2;HOMER1;LAMTOR2	0.522792	0.281671	0.716043
GO:0048306	calcium-dependent protein binding	http://amigo.geneontology.org/amigo/term/GO:0048306	4	1128	56	16560	1.04881	6275;6282;4322;302	S100A4;S100A11;MMP13;ANXA2	0.537709	0.269453	0.723338
GO:0003950	NAD+ ADP-ribosyltransferase activity	http://amigo.geneontology.org/amigo/term/GO:0003950	2	1128	26	16560	1.12953	165631;79668	PARP15;PARP8	0.540803	0.266961	0.723338
GO:0043425	bHLH transcription factor binding	http://amigo.geneontology.org/amigo/term/GO:0043425	2	1128	26	16560	1.12953	860;7291	RUNX2;TWIST1	0.540803	0.266961	0.723338
GO:0003841	1-acylglycerol-3-phosphate O-acyltransferase activity	http://amigo.geneontology.org/amigo/term/GO:0003841	1	1128	11	16560	1.33492	54947	LPCAT2	0.546613	0.26232	0.723338
GO:0005237	inhibitory extracellular ligand-gated ion channel activity	http://amigo.geneontology.org/amigo/term/GO:0005237	1	1128	11	16560	1.33492	2561	GABRB2	0.546613	0.26232	0.723338
GO:0043560	insulin receptor substrate binding	http://amigo.geneontology.org/amigo/term/GO:0043560	1	1128	11	16560	1.33492	2885	GRB2	0.546613	0.26232	0.723338
GO:0015643	toxic substance binding	http://amigo.geneontology.org/amigo/term/GO:0015643	1	1128	11	16560	1.33492	57583	TMEM181	0.546613	0.26232	0.723338
GO:0030414	peptidase inhibitor activity	http://amigo.geneontology.org/amigo/term/GO:0030414	1	1128	11	16560	1.33492	9232	PTTG1	0.546613	0.26232	0.723338
GO:0004143	diacylglycerol kinase activity	http://amigo.geneontology.org/amigo/term/GO:0004143	1	1128	11	16560	1.33492	1606	DGKA	0.546613	0.26232	0.723338
GO:0004303	estradiol 17-beta-dehydrogenase activity	http://amigo.geneontology.org/amigo/term/GO:0004303	1	1128	11	16560	1.33492	51170	HSD17B11	0.546613	0.26232	0.723338
GO:0043422	protein kinase B binding	http://amigo.geneontology.org/amigo/term/GO:0043422	1	1128	11	16560	1.33492	409	ARRB2	0.546613	0.26232	0.723338
GO:0030881	beta-2-microglobulin binding	http://amigo.geneontology.org/amigo/term/GO:0030881	1	1128	11	16560	1.33492	911	CD1C	0.546613	0.26232	0.723338
GO:0044183	protein binding involved in protein folding	http://amigo.geneontology.org/amigo/term/GO:0044183	1	1128	11	16560	1.33492	972	CD74	0.546613	0.26232	0.723338
GO:0004707	MAP kinase activity	http://amigo.geneontology.org/amigo/term/GO:0004707	1	1128	11	16560	1.33492	5594	MAPK1	0.546613	0.26232	0.723338
GO:0000989	transcription factor activity, transcription factor binding	http://amigo.geneontology.org/amigo/term/GO:0000989	1	1128	11	16560	1.33492	3091	HIF1A	0.546613	0.26232	0.723338
GO:0019992	diacylglycerol binding	http://amigo.geneontology.org/amigo/term/GO:0019992	1	1128	11	16560	1.33492	25780	RASGRP3	0.546613	0.26232	0.723338
GO:0008331	high voltage-gated calcium channel activity	http://amigo.geneontology.org/amigo/term/GO:0008331	1	1128	11	16560	1.33492	775	CACNA1C	0.546613	0.26232	0.723338
GO:0046933	proton-transporting ATP synthase activity, rotational mechanism	http://amigo.geneontology.org/amigo/term/GO:0046933	1	1128	11	16560	1.33492	514	ATP5E	0.546613	0.26232	0.723338
GO:0005245	voltage-gated calcium channel activity	http://amigo.geneontology.org/amigo/term/GO:0005245	3	1128	42	16560	1.04876	775;3685;23413	CACNA1C;ITGAV;NCS1	0.553955	0.256525	0.731678
GO:0001078	transcriptional repressor activity, RNA polymerase II core promoter proximal region sequence-specific binding	http://amigo.geneontology.org/amigo/term/GO:0001078	7	1128	103	16560	0.997714	6926;639;3428;9603;6688;467;6909	TBX3;PRDM1;IFI16;NFE2L3;SPI1;ATF3;TBX2	0.557959	0.253398	0.732703
GO:0004860	protein kinase inhibitor activity	http://amigo.geneontology.org/amigo/term/GO:0004860	2	1128	27	16560	1.08763	28951;9535	TRIB2;GMFG	0.560039	0.251782	0.732703
GO:0001205	transcriptional activator activity, RNA polymerase II distal enhancer sequence-specific binding	http://amigo.geneontology.org/amigo/term/GO:0001205	2	1128	27	16560	1.08763	4790;6688	NFKB1;SPI1	0.560039	0.251782	0.732703
GO:0001228	transcriptional activator activity, RNA polymerase II transcription regulatory region sequence-specific binding	http://amigo.geneontology.org/amigo/term/GO:0001228	5	1128	73	16560	1.00556	3091;51176;467;1820;80034	HIF1A;LEF1;ATF3;ARID3A;CSRNP3	0.561018	0.251023	0.732703
GO:0015347	sodium-independent organic anion transmembrane transporter activity	http://amigo.geneontology.org/amigo/term/GO:0015347	1	1128	12	16560	1.2236	11309	SLCO2B1	0.575546	0.23992	0.732703
GO:0016493	C-C chemokine receptor activity	http://amigo.geneontology.org/amigo/term/GO:0016493	1	1128	12	16560	1.2236	1230	CCR1	0.575546	0.23992	0.732703
GO:0004065	arylsulfatase activity	http://amigo.geneontology.org/amigo/term/GO:0004065	1	1128	12	16560	1.2236	23213	SULF1	0.575546	0.23992	0.732703
GO:0070410	co-SMAD binding	http://amigo.geneontology.org/amigo/term/GO:0070410	1	1128	12	16560	1.2236	4086	SMAD1	0.575546	0.23992	0.732703
GO:0004861	cyclin-dependent protein serine/threonine kinase inhibitor activity	http://amigo.geneontology.org/amigo/term/GO:0004861	1	1128	12	16560	1.2236	1026	CDKN1A	0.575546	0.23992	0.732703
GO:0004385	guanylate kinase activity	http://amigo.geneontology.org/amigo/term/GO:0004385	1	1128	12	16560	1.2236	1742	DLG4	0.575546	0.23992	0.732703
GO:0031491	nucleosome binding	http://amigo.geneontology.org/amigo/term/GO:0031491	1	1128	12	16560	1.2236	10467	ZNHIT1	0.575546	0.23992	0.732703
GO:0051393	alpha-actinin binding	http://amigo.geneontology.org/amigo/term/GO:0051393	1	1128	12	16560	1.2236	775	CACNA1C	0.575546	0.23992	0.732703
GO:0005313	L-glutamate transmembrane transporter activity	http://amigo.geneontology.org/amigo/term/GO:0005313	1	1128	12	16560	1.2236	6507	SLC1A3	0.575546	0.23992	0.732703
GO:0042301	phosphate ion binding	http://amigo.geneontology.org/amigo/term/GO:0042301	1	1128	12	16560	1.2236	10019	SH2B3	0.575546	0.23992	0.732703
GO:0008599	protein phosphatase type 1 regulator activity	http://amigo.geneontology.org/amigo/term/GO:0008599	1	1128	12	16560	1.2236	23645	PPP1R15A	0.575546	0.23992	0.732703
GO:0016279	protein-lysine N-methyltransferase activity	http://amigo.geneontology.org/amigo/term/GO:0016279	1	1128	12	16560	1.2236	2146	EZH2	0.575546	0.23992	0.732703
GO:0042623	ATPase activity, coupled	http://amigo.geneontology.org/amigo/term/GO:0042623	1	1128	12	16560	1.2236	4643	MYO1E	0.575546	0.23992	0.732703
GO:0071949	FAD binding	http://amigo.geneontology.org/amigo/term/GO:0071949	1	1128	12	16560	1.2236	9645	MICAL2	0.575546	0.23992	0.732703
GO:0050321	tau-protein kinase activity	http://amigo.geneontology.org/amigo/term/GO:0050321	1	1128	12	16560	1.2236	1020	CDK5	0.575546	0.23992	0.732703
GO:0000400	four-way junction DNA binding	http://amigo.geneontology.org/amigo/term/GO:0000400	1	1128	12	16560	1.2236	7516	XRCC2	0.575546	0.23992	0.732703
GO:0051721	protein phosphatase 2A binding	http://amigo.geneontology.org/amigo/term/GO:0051721	2	1128	28	16560	1.04872	775;55917	CACNA1C;CTTNBP2NL	0.578691	0.237554	0.734051
GO:0005246	calcium channel regulator activity	http://amigo.geneontology.org/amigo/term/GO:0005246	2	1128	28	16560	1.04872	9369;6446	NRXN3;SGK1	0.578691	0.237554	0.734051
GO:0019902	phosphatase binding	http://amigo.geneontology.org/amigo/term/GO:0019902	3	1128	44	16560	1.00097	5594;54843;170954	MAPK1;SYTL2;PPP1R18	0.583872	0.233682	0.737964
GO:0015293	symporter activity	http://amigo.geneontology.org/amigo/term/GO:0015293	3	1128	44	16560	1.00097	9120;57419;6567	SLC16A6;SLC24A3;SLC16A2	0.583872	0.233682	0.737964
GO:0017046	peptide hormone binding	http://amigo.geneontology.org/amigo/term/GO:0017046	2	1128	29	16560	1.01249	1889;5745	ECE1;PTH1R	0.596755	0.224204	0.752225
GO:0005521	lamin binding	http://amigo.geneontology.org/amigo/term/GO:0005521	1	1128	13	16560	1.12941	3429	IFI27	0.602634	0.219946	0.752225
GO:0070403	NAD+ binding	http://amigo.geneontology.org/amigo/term/GO:0070403	1	1128	13	16560	1.12941	2746	GLUD1	0.602634	0.219946	0.752225
GO:0030676	Rac guanyl-nucleotide exchange factor activity	http://amigo.geneontology.org/amigo/term/GO:0030676	1	1128	13	16560	1.12941	1794	DOCK2	0.602634	0.219946	0.752225
GO:0042043	neurexin family protein binding	http://amigo.geneontology.org/amigo/term/GO:0042043	1	1128	13	16560	1.12941	54843	SYTL2	0.602634	0.219946	0.752225
GO:0017160	Ral GTPase binding	http://amigo.geneontology.org/amigo/term/GO:0017160	1	1128	13	16560	1.12941	2316	FLNA	0.602634	0.219946	0.752225
GO:0003995	acyl-CoA dehydrogenase activity	http://amigo.geneontology.org/amigo/term/GO:0003995	1	1128	13	16560	1.12941	8309	ACOX2	0.602634	0.219946	0.752225
GO:0005262	calcium channel activity	http://amigo.geneontology.org/amigo/term/GO:0005262	3	1128	47	16560	0.936908	90550;51393;24145	MCU;TRPV2;PANX1	0.626276	0.203235	0.772917
GO:0001076	transcription factor activity, RNA polymerase II transcription factor binding	http://amigo.geneontology.org/amigo/term/GO:0001076	1	1128	14	16560	1.04868	3091	HIF1A	0.627995	0.202044	0.772917
GO:0034185	apolipoprotein binding	http://amigo.geneontology.org/amigo/term/GO:0034185	1	1128	14	16560	1.04868	4038	LRP4	0.627995	0.202044	0.772917
GO:0031432	titin binding	http://amigo.geneontology.org/amigo/term/GO:0031432	1	1128	14	16560	1.04868	817	CAMK2D	0.627995	0.202044	0.772917
GO:0008375	acetylglucosaminyltransferase activity	http://amigo.geneontology.org/amigo/term/GO:0008375	1	1128	14	16560	1.04868	2131	EXT1	0.627995	0.202044	0.772917
GO:0005523	tropomyosin binding	http://amigo.geneontology.org/amigo/term/GO:0005523	1	1128	14	16560	1.04868	800	CALD1	0.627995	0.202044	0.772917
GO:0034236	protein kinase A catalytic subunit binding	http://amigo.geneontology.org/amigo/term/GO:0034236	1	1128	14	16560	1.04868	7430	EZR	0.627995	0.202044	0.772917
GO:0004521	endoribonuclease activity	http://amigo.geneontology.org/amigo/term/GO:0004521	1	1128	14	16560	1.04868	8635	RNASET2	0.627995	0.202044	0.772917
GO:0050660	flavin adenine dinucleotide binding	http://amigo.geneontology.org/amigo/term/GO:0050660	4	1128	64	16560	0.91726	50507;1536;8564;8309	NOX4;CYBB;KMO;ACOX2	0.637669	0.195405	0.783454
GO:0015297	antiporter activity	http://amigo.geneontology.org/amigo/term/GO:0015297	2	1128	32	16560	0.917407	9056;8140	SLC7A7;SLC7A5	0.647429	0.188808	0.784315
GO:0050661	NADP binding	http://amigo.geneontology.org/amigo/term/GO:0050661	2	1128	32	16560	0.917407	847;23530	CAT;NNT	0.647429	0.188808	0.784315
GO:0052890	oxidoreductase activity, acting on the CH-CH group of donors, with a flavin as acceptor	http://amigo.geneontology.org/amigo/term/GO:0052890	1	1128	15	16560	0.978705	8309	ACOX2	0.651739	0.185926	0.784315
GO:0015269	calcium-activated potassium channel activity	http://amigo.geneontology.org/amigo/term/GO:0015269	1	1128	15	16560	0.978705	3783	KCNN4	0.651739	0.185926	0.784315
GO:0017016	Ras GTPase binding	http://amigo.geneontology.org/amigo/term/GO:0017016	1	1128	15	16560	0.978705	25780	RASGRP3	0.651739	0.185926	0.784315
GO:0046965	retinoid X receptor binding	http://amigo.geneontology.org/amigo/term/GO:0046965	1	1128	15	16560	0.978705	7421	VDR	0.651739	0.185926	0.784315
GO:0022841	potassium ion leak channel activity	http://amigo.geneontology.org/amigo/term/GO:0022841	1	1128	15	16560	0.978705	3776	KCNK2	0.651739	0.185926	0.784315
GO:0043495	protein anchor	http://amigo.geneontology.org/amigo/term/GO:0043495	1	1128	15	16560	0.978705	4627	MYH9	0.651739	0.185926	0.784315
GO:0048018	receptor agonist activity	http://amigo.geneontology.org/amigo/term/GO:0048018	1	1128	15	16560	0.978705	6423	SFRP2	0.651739	0.185926	0.784315
GO:0045502	dynein binding	http://amigo.geneontology.org/amigo/term/GO:0045502	1	1128	15	16560	0.978705	1063	CENPF	0.651739	0.185926	0.784315
GO:0004089	carbonate dehydratase activity	http://amigo.geneontology.org/amigo/term/GO:0004089	1	1128	15	16560	0.978705	771	CA12	0.651739	0.185926	0.784315
GO:0004012	phospholipid-translocating ATPase activity	http://amigo.geneontology.org/amigo/term/GO:0004012	1	1128	15	16560	0.978705	5205	ATP8B1	0.651739	0.185926	0.784315
GO:0001190	transcriptional activator activity, RNA polymerase II transcription factor binding	http://amigo.geneontology.org/amigo/term/GO:0001190	1	1128	16	16560	0.91748	3725	JUN	0.673968	0.17136	0.801476
GO:0005112	Notch binding	http://amigo.geneontology.org/amigo/term/GO:0005112	1	1128	16	16560	0.91748	56892	C8orf4	0.673968	0.17136	0.801476
GO:0005328	neurotransmitter:sodium symporter activity	http://amigo.geneontology.org/amigo/term/GO:0005328	1	1128	16	16560	0.91748	6536	SLC6A9	0.673968	0.17136	0.801476
GO:0017091	AU-rich element binding	http://amigo.geneontology.org/amigo/term/GO:0017091	1	1128	16	16560	0.91748	677	ZFP36L1	0.673968	0.17136	0.801476
GO:0017049	GTP-Rho binding	http://amigo.geneontology.org/amigo/term/GO:0017049	1	1128	16	16560	0.91748	7126	TNFAIP1	0.673968	0.17136	0.801476
GO:0034237	protein kinase A regulatory subunit binding	http://amigo.geneontology.org/amigo/term/GO:0034237	1	1128	16	16560	0.91748	7430	EZR	0.673968	0.17136	0.801476
GO:0005319	lipid transporter activity	http://amigo.geneontology.org/amigo/term/GO:0005319	1	1128	16	16560	0.91748	2760	GM2A	0.673968	0.17136	0.801476
GO:0000976	transcription regulatory region sequence-specific DNA binding	http://amigo.geneontology.org/amigo/term/GO:0000976	2	1128	34	16560	0.863337	4790;467	NFKB1;ATF3	0.678317	0.168567	0.805287
GO:0008094	DNA-dependent ATPase activity	http://amigo.geneontology.org/amigo/term/GO:0008094	2	1128	35	16560	0.83862	7516;7153	XRCC2;TOP2A	0.692915	0.15932	0.81657
GO:0042800	histone methyltransferase activity (H3-K4 specific)	http://amigo.geneontology.org/amigo/term/GO:0042800	1	1128	17	16560	0.863458	80335	WDR82	0.69478	0.158153	0.81657
GO:0008574	ATP-dependent microtubule motor activity, plus-end-directed	http://amigo.geneontology.org/amigo/term/GO:0008574	1	1128	17	16560	0.863458	81930	KIF18A	0.69478	0.158153	0.81657
GO:0004029	aldehyde dehydrogenase (NAD) activity	http://amigo.geneontology.org/amigo/term/GO:0004029	1	1128	17	16560	0.863458	160428	ALDH1L2	0.69478	0.158153	0.81657
GO:0017075	syntaxin-1 binding	http://amigo.geneontology.org/amigo/term/GO:0017075	1	1128	17	16560	0.863458	1612	DAPK1	0.69478	0.158153	0.81657
GO:0016597	amino acid binding	http://amigo.geneontology.org/amigo/term/GO:0016597	1	1128	17	16560	0.863458	23564	DDAH2	0.69478	0.158153	0.81657
GO:0001085	RNA polymerase II transcription factor binding	http://amigo.geneontology.org/amigo/term/GO:0001085	2	1128	36	16560	0.815275	6926;6688	TBX3;SPI1	0.706961	0.150605	0.824331
GO:0030674	protein binding, bridging	http://amigo.geneontology.org/amigo/term/GO:0030674	4	1128	71	16560	0.826475	7373;1278;55803;55691	COL14A1;COL1A2;ADAP2;FRMD4A	0.712702	0.147092	0.824331
GO:0003824	catalytic activity	http://amigo.geneontology.org/amigo/term/GO:0003824	3	1128	54	16560	0.815111	23564;427;8972	DDAH2;ASAH1;MGAM	0.713228	0.146772	0.824331
GO:0005248	voltage-gated sodium channel activity	http://amigo.geneontology.org/amigo/term/GO:0005248	1	1128	18	16560	0.815439	6335	SCN9A	0.714264	0.146141	0.824331
GO:0022857	transmembrane transporter activity	http://amigo.geneontology.org/amigo/term/GO:0022857	1	1128	18	16560	0.815439	514	ATP5E	0.714264	0.146141	0.824331
GO:0016209	antioxidant activity	http://amigo.geneontology.org/amigo/term/GO:0016209	1	1128	18	16560	0.815439	847	CAT	0.714264	0.146141	0.824331
GO:0005086	ARF guanyl-nucleotide exchange factor activity	http://amigo.geneontology.org/amigo/term/GO:0005086	1	1128	18	16560	0.815439	9265	CYTH3	0.714264	0.146141	0.824331
GO:0005537	mannose binding	http://amigo.geneontology.org/amigo/term/GO:0005537	1	1128	18	16560	0.815439	4360	MRC1	0.714264	0.146141	0.824331
GO:0071837	HMG box domain binding	http://amigo.geneontology.org/amigo/term/GO:0071837	1	1128	18	16560	0.815439	3725	JUN	0.714264	0.146141	0.824331
GO:0070530	K63-linked polyubiquitin binding	http://amigo.geneontology.org/amigo/term/GO:0070530	1	1128	18	16560	0.815439	7128	TNFAIP3	0.714264	0.146141	0.824331
GO:0043274	phospholipase binding	http://amigo.geneontology.org/amigo/term/GO:0043274	1	1128	18	16560	0.815439	7454	WAS	0.714264	0.146141	0.824331
GO:0004890	GABA-A receptor activity	http://amigo.geneontology.org/amigo/term/GO:0004890	1	1128	19	16560	0.772475	2561	GABRB2	0.732506	0.135189	0.839877
GO:0005452	inorganic anion exchanger activity	http://amigo.geneontology.org/amigo/term/GO:0005452	1	1128	19	16560	0.772475	57282	SLC4A10	0.732506	0.135189	0.839877
GO:0004550	nucleoside diphosphate kinase activity	http://amigo.geneontology.org/amigo/term/GO:0004550	1	1128	19	16560	0.772475	26289	AK5	0.732506	0.135189	0.839877
GO:0017025	TBP-class protein binding	http://amigo.geneontology.org/amigo/term/GO:0017025	1	1128	19	16560	0.772475	1810	DR1	0.732506	0.135189	0.839877
GO:0005506	iron ion binding	http://amigo.geneontology.org/amigo/term/GO:0005506	8	1128	141	16560	0.831763	64175;9420;9023;6916;1545;1586;2495;5740	P3H1;CYP7B1;CH25H;TBXAS1;CYP1B1;CYP17A1;FTH1;PTGIS	0.74119	0.13007	0.848329
GO:0015485	cholesterol binding	http://amigo.geneontology.org/amigo/term/GO:0015485	2	1128	39	16560	0.752425	26031;10613	OSBPL3;ERLIN1	0.745903	0.127318	0.848329
GO:0008137	NADH dehydrogenase (ubiquinone) activity	http://amigo.geneontology.org/amigo/term/GO:0008137	2	1128	39	16560	0.752425	55967;4708	NDUFA12;NDUFB2	0.745903	0.127318	0.848329
GO:0050681	androgen receptor binding	http://amigo.geneontology.org/amigo/term/GO:0050681	2	1128	39	16560	0.752425	1499;898	CTNNB1;CCNE1	0.745903	0.127318	0.848329
GO:0015631	tubulin binding	http://amigo.geneontology.org/amigo/term/GO:0015631	2	1128	39	16560	0.752425	51673;2534	TPPP3;FYN	0.745903	0.127318	0.848329
GO:0005104	fibroblast growth factor receptor binding	http://amigo.geneontology.org/amigo/term/GO:0005104	1	1128	20	16560	0.733807	2255	FGF10	0.749584	0.12518	0.848404
GO:0016712	oxidoreductase activity, acting on paired donors, with incorporation or reduction of molecular oxygen, reduced flavin or flavoprotein as one donor, and incorporation of one atom of oxygen	http://amigo.geneontology.org/amigo/term/GO:0016712	1	1128	20	16560	0.733807	1545	CYP1B1	0.749584	0.12518	0.848404
GO:0004653	polypeptide N-acetylgalactosaminyltransferase activity	http://amigo.geneontology.org/amigo/term/GO:0004653	1	1128	20	16560	0.733807	2589	GALNT1	0.749584	0.12518	0.848404
GO:0044212	transcription regulatory region DNA binding	http://amigo.geneontology.org/amigo/term/GO:0044212	10	1128	177	16560	0.827901	1499;51176;196;4790;6495;2305;2353;3725;467;90993	CTNNB1;LEF1;AHR;NFKB1;SIX1;FOXM1;FOS;JUN;ATF3;CREB3L1	0.760984	0.118624	0.858221
GO:0005261	cation channel activity	http://amigo.geneontology.org/amigo/term/GO:0005261	1	1128	21	16560	0.698821	51393	TRPV2	0.765572	0.116014	0.858221
GO:0030295	protein kinase activator activity	http://amigo.geneontology.org/amigo/term/GO:0030295	1	1128	21	16560	0.698821	3071	NCKAP1L	0.765572	0.116014	0.858221
GO:0070330	aromatase activity	http://amigo.geneontology.org/amigo/term/GO:0070330	1	1128	21	16560	0.698821	1545	CYP1B1	0.765572	0.116014	0.858221
GO:0004198	calcium-dependent cysteine-type endopeptidase activity	http://amigo.geneontology.org/amigo/term/GO:0004198	1	1128	21	16560	0.698821	824	CAPN2	0.765572	0.116014	0.858221
GO:0004623	phospholipase A2 activity	http://amigo.geneontology.org/amigo/term/GO:0004623	1	1128	21	16560	0.698821	5321	PLA2G4A	0.765572	0.116014	0.858221
GO:0000149	SNARE binding	http://amigo.geneontology.org/amigo/term/GO:0000149	2	1128	41	16560	0.715635	7127;84079	TNFAIP2;ANKRD27	0.769326	0.11389	0.859691
GO:0000049	tRNA binding	http://amigo.geneontology.org/amigo/term/GO:0000049	2	1128	41	16560	0.715635	54974;91607	THG1L;SLFN11	0.769326	0.11389	0.859691
GO:0005179	hormone activity	http://amigo.geneontology.org/amigo/term/GO:0005179	5	1128	95	16560	0.771664	284207;4828;3625;10911;3479	METRNL;NMB;INHBB;UTS2;IGF1	0.772196	0.112272	0.861531
GO:0019825	oxygen binding	http://amigo.geneontology.org/amigo/term/GO:0019825	2	1128	42	16560	0.698554	1545;1586	CYP1B1;CYP17A1	0.780316	0.107729	0.865356
GO:0008198	ferrous iron binding	http://amigo.geneontology.org/amigo/term/GO:0008198	1	1128	22	16560	0.667016	5351	PLOD1	0.780541	0.107604	0.865356
GO:0008395	steroid hydroxylase activity	http://amigo.geneontology.org/amigo/term/GO:0008395	1	1128	22	16560	0.667016	9023	CH25H	0.780541	0.107604	0.865356
GO:0030515	snoRNA binding	http://amigo.geneontology.org/amigo/term/GO:0030515	1	1128	22	16560	0.667016	55505	NOP10	0.780541	0.107604	0.865356
GO:0001047	core promoter binding	http://amigo.geneontology.org/amigo/term/GO:0001047	3	1128	61	16560	0.721268	2146;3428;6688	EZH2;IFI16;SPI1	0.783686	0.105858	0.867476
GO:0030507	spectrin binding	http://amigo.geneontology.org/amigo/term/GO:0030507	1	1128	23	16560	0.637977	4651	MYO10	0.794555	0.0998763	0.875378
GO:0003899	DNA-directed RNA polymerase activity	http://amigo.geneontology.org/amigo/term/GO:0003899	1	1128	23	16560	0.637977	9477	MED20	0.794555	0.0998763	0.875378
GO:0050699	WW domain binding	http://amigo.geneontology.org/amigo/term/GO:0050699	1	1128	23	16560	0.637977	55740	ENAH	0.794555	0.0998763	0.875378
GO:0001786	phosphatidylserine binding	http://amigo.geneontology.org/amigo/term/GO:0001786	1	1128	24	16560	0.611358	54843	SYTL2	0.807674	0.0927639	0.885674
GO:0008146	sulfotransferase activity	http://amigo.geneontology.org/amigo/term/GO:0008146	1	1128	24	16560	0.611358	9956	HS3ST2	0.807674	0.0927639	0.885674
GO:0004709	MAP kinase kinase kinase activity	http://amigo.geneontology.org/amigo/term/GO:0004709	1	1128	24	16560	0.611358	7786	MAP3K12	0.807674	0.0927639	0.885674
GO:0052689	carboxylic ester hydrolase activity	http://amigo.geneontology.org/amigo/term/GO:0052689	1	1128	25	16560	0.586868	57552	NCEH1	0.819956	0.0862092	0.89635
GO:0001106	RNA polymerase II transcription corepressor activity	http://amigo.geneontology.org/amigo/term/GO:0001106	1	1128	25	16560	0.586868	26508	HEYL	0.819956	0.0862092	0.89635
GO:0000980	RNA polymerase II distal enhancer sequence-specific DNA binding	http://amigo.geneontology.org/amigo/term/GO:0000980	3	1128	66	16560	0.666424	4790;6688;3725	NFKB1;SPI1;JUN	0.824736	0.0836851	0.900177
GO:0017137	Rab GTPase binding	http://amigo.geneontology.org/amigo/term/GO:0017137	4	1128	85	16560	0.689763	54843;84079;4645;302	SYTL2;ANKRD27;MYO5B;ANXA2	0.827245	0.0823657	0.901518
GO:0001103	RNA polymerase II repressing transcription factor binding	http://amigo.geneontology.org/amigo/term/GO:0001103	1	1128	27	16560	0.54333	3516	RBPJ	0.84222	0.0745745	0.916419
GO:0003707	steroid hormone receptor activity	http://amigo.geneontology.org/amigo/term/GO:0003707	2	1128	49	16560	0.598507	8013;7421	NR4A3;VDR	0.845107	0.0730885	0.918141
GO:0015020	glucuronosyltransferase activity	http://amigo.geneontology.org/amigo/term/GO:0015020	1	1128	28	16560	0.523894	2131	EXT1	0.852298	0.0694086	0.921686
GO:0051059	NF-kappaB binding	http://amigo.geneontology.org/amigo/term/GO:0051059	1	1128	28	16560	0.523894	5687	PSMA6	0.852298	0.0694086	0.921686
GO:0005154	epidermal growth factor receptor binding	http://amigo.geneontology.org/amigo/term/GO:0005154	1	1128	28	16560	0.523894	2885	GRB2	0.852298	0.0694086	0.921686
GO:0004842	ubiquitin-protein transferase activity	http://amigo.geneontology.org/amigo/term/GO:0004842	13	1128	248	16560	0.766874	330;7334;867;51514;58484;7128;23327;11065;7126;57520;4671;4008;29089	BIRC3;UBE2N;CBL;DTL;NLRC4;TNFAIP3;NEDD4L;UBE2C;TNFAIP1;HECW2;NAIP;LMO7;UBE2T	0.856475	0.0672855	0.924782
GO:0000062	fatty-acyl-CoA binding	http://amigo.geneontology.org/amigo/term/GO:0000062	1	1128	29	16560	0.505798	8309	ACOX2	0.861733	0.0646275	0.927614
GO:0004857	enzyme inhibitor activity	http://amigo.geneontology.org/amigo/term/GO:0004857	1	1128	29	16560	0.505798	51129	ANGPTL4	0.861733	0.0646275	0.927614
GO:0004843	ubiquitin-specific protease activity	http://amigo.geneontology.org/amigo/term/GO:0004843	4	1128	91	16560	0.64405	7345;7128;84669;373856	UCHL1;TNFAIP3;USP32;USP41	0.863236	0.0638706	0.927814
GO:0017112	Rab guanyl-nucleotide exchange factor activity	http://amigo.geneontology.org/amigo/term/GO:0017112	1	1128	30	16560	0.488909	58485	TRAPPC1	0.870565	0.0601987	0.934265
GO:0003682	chromatin binding	http://amigo.geneontology.org/amigo/term/GO:0003682	20	1128	372	16560	0.78549	9760;1063;57616;7091;51176;4790;2146;3516;860;6495;2353;55636;29089;3725;80335;90993;7153;5111;1820;64641	TOX;CENPF;TSHZ3;TLE4;LEF1;NFKB1;EZH2;RBPJ;RUNX2;SIX1;FOS;CHD7;UBE2T;JUN;WDR82;CREB3L1;TOP2A;PCNA;ARID3A;EBF2	0.877227	0.0568878	0.939982
GO:0005267	potassium channel activity	http://amigo.geneontology.org/amigo/term/GO:0005267	1	1128	31	16560	0.473109	10060	ABCC9	0.878834	0.0560931	0.940272
GO:0047485	protein N-terminus binding	http://amigo.geneontology.org/amigo/term/GO:0047485	4	1128	96	16560	0.61032	3516;241;5501;9638	RBPJ;ALOX5AP;PPP1CC;FEZ1	0.888131	0.0515231	0.948777
GO:0003714	transcription corepressor activity	http://amigo.geneontology.org/amigo/term/GO:0003714	9	1128	189	16560	0.696668	22797;7091;595;1810;3399;467;51053;26508;2004	TFEC;TLE4;CCND1;DR1;ID3;ATF3;GMNN;HEYL;ELK3	0.891144	0.0500522	0.950554
GO:0003713	transcription coactivator activity	http://amigo.geneontology.org/amigo/term/GO:0003713	12	1128	245	16560	0.716041	1499;9124;22797;8609;9477;898;57496;9457;9603;11030;7027;3725	CTNNB1;PDLIM1;TFEC;KLF7;MED20;CCNE1;MKL2;FHL5;NFE2L3;RBPMS;TFDP1;JUN	0.900493	0.0455197	0.957744
GO:0001104	RNA polymerase II transcription cofactor activity	http://amigo.geneontology.org/amigo/term/GO:0001104	1	1128	34	16560	0.431286	9477	MED20	0.900606	0.0454651	0.957744
GO:0003684	damaged DNA binding	http://amigo.geneontology.org/amigo/term/GO:0003684	2	1128	59	16560	0.496764	3014;5111	H2AFX;PCNA	0.907803	0.0420083	0.960663
GO:0002039	p53 binding	http://amigo.geneontology.org/amigo/term/GO:0002039	2	1128	59	16560	0.496764	4916;1020	NTRK3;CDK5	0.907803	0.0420083	0.960663
GO:0051087	chaperone binding	http://amigo.geneontology.org/amigo/term/GO:0051087	3	1128	81	16560	0.542519	3337;3301;581	DNAJB1;DNAJA1;BAX	0.910194	0.0408659	0.960663
GO:0051082	unfolded protein binding	http://amigo.geneontology.org/amigo/term/GO:0051082	4	1128	102	16560	0.57421	3337;22948;871;3301	DNAJB1;CCT5;SERPINH1;DNAJA1	0.912701	0.0396714	0.960663
GO:0003730	mRNA 3'-UTR binding	http://amigo.geneontology.org/amigo/term/GO:0003730	1	1128	36	16560	0.407276	1618	DAZL	0.912903	0.0395754	0.960663
GO:0004879	RNA polymerase II transcription factor activity, ligand-activated sequence-specific DNA binding	http://amigo.geneontology.org/amigo/term/GO:0004879	1	1128	36	16560	0.407276	196	AHR	0.912903	0.0395754	0.960663
GO:0003727	single-stranded RNA binding	http://amigo.geneontology.org/amigo/term/GO:0003727	1	1128	36	16560	0.407276	51311	TLR8	0.912903	0.0395754	0.960663
GO:0004519	endonuclease activity	http://amigo.geneontology.org/amigo/term/GO:0004519	1	1128	37	16560	0.396245	6039	RNASE6	0.918469	0.0369356	0.965078
GO:0001046	core promoter sequence-specific DNA binding	http://amigo.geneontology.org/amigo/term/GO:0001046	1	1128	38	16560	0.385794	8013	NR4A3	0.923679	0.0344787	0.969106
GO:0003729	mRNA binding	http://amigo.geneontology.org/amigo/term/GO:0003729	3	1128	88	16560	0.499152	9775;7298;677	EIF4A3;TYMS;ZFP36L1	0.935312	0.0290435	0.979851
GO:0003777	microtubule motor activity	http://amigo.geneontology.org/amigo/term/GO:0003777	2	1128	67	16560	0.437237	10112;55083	KIF20A;KIF26B	0.939918	0.0269101	0.982053
GO:0000981	RNA polymerase II transcription factor activity, sequence-specific DNA binding	http://amigo.geneontology.org/amigo/term/GO:0000981	6	1128	151	16560	0.581117	860;2305;7291;6688;7027;3725	RUNX2;FOXM1;TWIST1;SPI1;TFDP1;JUN	0.940204	0.026778	0.982053
GO:0016887	ATPase activity	http://amigo.geneontology.org/amigo/term/GO:0016887	6	1128	152	16560	0.577259	4627;10112;4363;514;55083;439	MYH9;KIF20A;ABCC1;ATP5E;KIF26B;ASNA1	0.942432	0.02575	0.982922
GO:0008168	methyltransferase activity	http://amigo.geneontology.org/amigo/term/GO:0008168	2	1128	69	16560	0.424512	160428;639	ALDH1L2;PRDM1	0.946101	0.0240627	0.985288
GO:0005249	voltage-gated potassium channel activity	http://amigo.geneontology.org/amigo/term/GO:0005249	1	1128	45	16560	0.325643	7881	KCNAB1	0.951936	0.0213922	0.987338
GO:0003823	antigen binding	http://amigo.geneontology.org/amigo/term/GO:0003823	1	1128	45	16560	0.325643	3575	IL7R	0.951936	0.0213922	0.987338
GO:0003700	transcription factor activity, sequence-specific DNA binding	http://amigo.geneontology.org/amigo/term/GO:0003700	45	1128	835	16560	0.782507	1499;3091;80818;10745;867;4323;22797;51176;10736;5993;8609;196;23493;8522;4790;639;677;3516;57496;731220;860;6495;2305;1879;9603;2353;1831;3399;56938;6773;6688;7027;3725;9819;467;1316;4086;4609;7421;26508;80034;9232;2004;23462;56995	CTNNB1;HIF1A;ZNF436;PHTF1;CBL;MMP14;TFEC;LEF1;SIX2;RFX5;KLF7;AHR;HEY2;GAS7;NFKB1;PRDM1;ZFP36L1;RBPJ;MKL2;RFX8;RUNX2;SIX1;FOXM1;EBF1;NFE2L3;FOS;TSC22D3;ID3;ARNTL2;STAT2;SPI1;TFDP1;JUN;TSC22D2;ATF3;KLF6;SMAD1;MYC;VDR;HEYL;CSRNP3;PTTG1;ELK3;HEY1;TULP4	0.953535	0.0206636	0.987338
GO:0030276	clathrin binding	http://amigo.geneontology.org/amigo/term/GO:0030276	1	1128	46	16560	0.318545	54843	SYTL2	0.955009	0.0199925	0.987338
GO:0019905	syntaxin binding	http://amigo.geneontology.org/amigo/term/GO:0019905	2	1128	73	16560	0.401153	54843;25	SYTL2;ABL1	0.956695	0.0192266	0.987338
GO:0031490	chromatin DNA binding	http://amigo.geneontology.org/amigo/term/GO:0031490	1	1128	47	16560	0.311748	2146	EZH2	0.957886	0.0186862	0.987338
GO:0004386	helicase activity	http://amigo.geneontology.org/amigo/term/GO:0004386	1	1128	47	16560	0.311748	55636	CHD7	0.957886	0.0186862	0.987338
GO:0030374	ligand-dependent nuclear receptor transcription coactivator activity	http://amigo.geneontology.org/amigo/term/GO:0030374	1	1128	48	16560	0.305235	87	ACTN1	0.960579	0.0174669	0.988666
GO:0003676	nucleic acid binding	http://amigo.geneontology.org/amigo/term/GO:0003676	7	1128	184	16560	0.555754	93166;6039;30846;5168;6035;25939;30845	PRDM6;RNASE6;EHD2;ENPP2;RNASE1;SAMHD1;EHD3	0.963855	0.0159884	0.990589
GO:0061630	ubiquitin protein ligase activity	http://amigo.geneontology.org/amigo/term/GO:0061630	6	1128	167	16560	0.524929	7334;867;23327;9477;11065;29089	UBE2N;CBL;NEDD4L;MED20;UBE2C;UBE2T	0.968004	0.0141228	0.993404
GO:0030170	pyridoxal phosphate binding	http://amigo.geneontology.org/amigo/term/GO:0030170	1	1128	52	16560	0.281687	9517	SPTLC2	0.969737	0.0133461	0.993733
GO:0003674	molecular_function	http://amigo.geneontology.org/amigo/term/GO:0003674	38	1128	744	16560	0.741107	284207;1466;51696;57190;10184;58986;64175;7091;11259;11270;653121;116159;151556;123879;199;3429;338773;442213;94239;65009;161;27436;54622;374897;53346;80380;55092;84823;84191;202;7170;25878;57124;266727;10867;66000;55619;57446	METRNL;CSRP2;HECA;SEPN1;LHFPL2;TMEM8A;P3H1;TLE4;FILIP1L;NRM;ZBTB8A;CYYR1;GPR155;DCUN1D3;AIF1;IFI27;TMEM119;PTCHD4;H2AFV;NDRG4;AP2A2;EML4;ARL15;SBSN;TM6SF1;PDCD1LG2;TMEM51;LMNB2;FAM96A;AIM1;TPM3;MXRA5;CD248;MDGA1;TSPAN9;TMEM108;DOCK10;NDRG3	0.971747	0.0124469	0.99427
GO:0001227	transcriptional repressor activity, RNA polymerase II transcription regulatory region sequence-specific binding	http://amigo.geneontology.org/amigo/term/GO:0001227	1	1128	54	16560	0.271222	4790	NFKB1	0.973485	0.0116709	0.99427
GO:0042393	histone binding	http://amigo.geneontology.org/amigo/term/GO:0042393	3	1128	107	16560	0.410044	51176;3014;55355	LEF1;H2AFX;HJURP	0.974497	0.0112193	0.99427
GO:0008270	zinc ion binding	http://amigo.geneontology.org/amigo/term/GO:0008270	64	1128	1187	16560	0.779016	330;4318;1466;867;4323;4325;91107;7384;9124;4311;1396;8609;8038;8013;4313;1756;4281;1636;27350;5877;9509;7128;81792;9507;649;7092;4327;1359;56999;9510;57688;9457;25797;8754;3984;22885;51752;1837;4939;56265;5168;79142;4008;8728;4125;290;7791;51304;9645;4938;55679;57140;25939;253832;170690;4322;7421;771;55625;6274;51816;57484;3927;9540	BIRC3;MMP9;CSRP2;CBL;MMP14;MMP16;TRIM47;UQCRC1;PDLIM1;MME;CRIP1;KLF7;ADAM12;NR4A3;MMP2;DMD;MID1;ACE;APOBEC3C;RABIF;ADAMTS2;TNFAIP3;ADAMTS12;ADAMTS4;BMP1;TLL1;MMP19;CPA3;ADAMTS9;ADAMTS1;ZSWIM6;FHL5;QPCT;ADAM9;LIMK1;ABLIM3;ERAP1;DTNA;OAS2;CPXM1;ENPP2;PHF23;LMO7;ADAM19;MAN2B1;ANPEP;ZYX;ZDHHC3;MICAL2;OAS1;LIMS2;RNPEPL1;SAMHD1;ZDHHC20;ADAMTS16;MMP13;VDR;CA12;ZDHHC7;S100A3;CECR1;RNF150;LASP1;TP53I3	0.977312	0.0099668	0.995698
GO:0003712	transcription cofactor activity	http://amigo.geneontology.org/amigo/term/GO:0003712	1	1128	58	16560	0.252455	9079	LDB2	0.979646	0.00893076	0.996634
GO:0004004	ATP-dependent RNA helicase activity	http://amigo.geneontology.org/amigo/term/GO:0004004	1	1128	63	16560	0.232349	9775	EIF4A3	0.985377	0.00639767	1
GO:0043565	sequence-specific DNA binding	http://amigo.geneontology.org/amigo/term/GO:0043565	15	1128	369	16560	0.591348	3091;51176;196;23493;6474;6926;2146;3516;1810;6495;2305;6909;90993;7421;80034	HIF1A;LEF1;AHR;HEY2;SHOX2;TBX3;EZH2;RBPJ;DR1;SIX1;FOXM1;TBX2;CREB3L1;VDR;CSRNP3	0.987354	0.00552716	1
GO:0004930	G-protein coupled receptor activity	http://amigo.geneontology.org/amigo/term/GO:0004930	30	1128	642	16560	0.677442	23432;387509;23596;8477;221395;1240;187;25960;22859;8324;64123;6424;10161;5724;719;2857;6423;10203;26996;11245;1903;8321;9289;162998;1880;8111;6422;1901;7852;976	GPR161;GPR153;OPN3;GPR65;ADGRF5;CMKLR1;APLNR;ADGRA2;ADGRL1;FZD7;ADGRL4;SFRP4;LPAR6;PTAFR;C3AR1;GPR34;SFRP2;CALCRL;GPR160;GPR176;S1PR3;FZD1;ADGRG1;OR7D2;GPR183;GPR68;SFRP1;S1PR1;CXCR4;ADGRE5	0.987534	0.00544805	1
GO:0000166	nucleotide binding	http://amigo.geneontology.org/amigo/term/GO:0000166	11	1128	302	16560	0.530151	10659;1618;56952;50507;7298;50804;28951;3704;11030;54899;11000	CELF2;DAZL;PRTFDC1;NOX4;TYMS;MYEF2;TRIB2;ITPA;RBPMS;PXK;SLC27A3	0.991231	0.00382531	1
GO:0046872	metal ion binding	http://amigo.geneontology.org/amigo/term/GO:0046872	101	1128	1848	16560	0.782926	285;55233;10672;80818;3684;391059;54704;3162;57616;22856;847;2971;128553;7046;775;348654;1026;10404;91419;3426;1289;653121;2775;285381;1123;717;126308;55512;9369;1278;639;677;89846;3486;93166;1536;1297;118429;54796;2983;3685;2534;1280;359948;8829;1528;94;84911;10467;1889;55803;4671;84168;3339;6948;2799;50807;121340;1277;658;1879;3301;9334;4939;2776;113;22801;3704;57089;50484;493856;152485;249;654…	ANGPT2;MOB1A;GNA13;ZNF436;ITGAM;FRRS1;PDP1;HMOX1;TSHZ3;CHSY1;CAT;GTF3A;TSHZ2;TGFBR1;CACNA1C;GEN1;CDKN1A;CPQ;XRCC6BP1;CFI;COL5A1;ZBTB8A;GNAO1;DPH3;CHN1;C2;MOB3A;SMPD3;NRXN3;COL1A2;PRDM1;ZFP36L1;FGD3;IGFBP3;PRDM6;CYBB;COL9A1;ANTXR2;BNC2;GUCY1B3;ITGAV;FYN;COL2A1;IRF2BP2;NRP1;CYB5A;ACVRL1;ZNF382;ZNHIT1;ECE1;ADAP2;NAIP;ANTXR1;HSPG2;TCN2;GNS;ASAP1;SP7;COL1A1;BMPR1B;EBF1;DNAJA1;B4GALT5;OAS2;GNAQ;ADCY7;I…	0.991647	0.00364311	1
GO:0016874	ligase activity	http://amigo.geneontology.org/amigo/term/GO:0016874	10	1128	284	16560	0.512611	330;7334;867;7345;4281;7128;23327;11065;57520;29089	BIRC3;UBE2N;CBL;UCHL1;MID1;TNFAIP3;NEDD4L;UBE2C;HECW2;UBE2T	0.991909	0.00352811	1
GO:0000977	RNA polymerase II regulatory region sequence-specific DNA binding	http://amigo.geneontology.org/amigo/term/GO:0000977	4	1128	197	16560	0.29559	51176;4790;467;1820	LEF1;NFKB1;ATF3;ARID3A	0.999106	0.000388217	1
GO:0003723	RNA binding	http://amigo.geneontology.org/amigo/term/GO:0003723	11	1128	406	16560	0.391826	2971;10659;1618;2146;79228;8635;5687;6688;10656;25939;51311	GTF3A;CELF2;DAZL;EZH2;THOC6;RNASET2;PSMA6;SPI1;KHDRBS3;SAMHD1;TLR8	0.999869	5.67e-05	1
GO:0003735	structural constituent of ribosome	http://amigo.geneontology.org/amigo/term/GO:0003735	1	1128	157	16560	0.0927043	51065	RPS27L	0.999971	1.25e-05	1
GO:0044822	poly(A) RNA binding	http://amigo.geneontology.org/amigo/term/GO:0044822	43	1128	1125	16560	0.543742	7334;1476;2885;3956;4627;10659;6275;5339;2896;51203;26010;27350;64092;3838;55920;388753;9775;55379;7373;140576;677;79868;115207;50804;871;7430;3428;51388;7114;6711;11030;493856;80114;2316;10656;3725;7791;5216;7153;5501;302;1759;51065	UBE2N;CSTB;GRB2;LGALS1;MYH9;CELF2;S100A4;PLEC;GRN;NUSAP1;SPATS2L;APOBEC3C;SAMSN1;KPNA2;RCC2;COA6;EIF4A3;LRRC59;COL14A1;S100A16;ZFP36L1;ALG13;KCTD12;MYEF2;SERPINH1;EZR;IFI16;NIP7;TMSB4X;SPTBN1;RBPMS;CISD2;BICC1;FLNA;KHDRBS3;JUN;ZYX;PFN1;TOP2A;PPP1CC;ANXA2;DNM1;RPS27L	0.999989	4.59e-06	1
GO:0003677	DNA binding	http://amigo.geneontology.org/amigo/term/GO:0003677	48	1128	1487	16560	0.450512	9760;80818;10745;57616;26040;2971;128553;348654;5594;51176;115677;3014;5993;8609;196;8013;8340;51203;8345;253782;653121;7128;2146;677;54796;3516;8342;50804;94239;84911;1810;6495;2305;121340;387103;2354;152485;6773;7027;3725;115004;6909;4609;25;7153;7421;55355;51311	TOX;ZNF436;PHTF1;TSHZ3;SETBP1;GTF3A;TSHZ2;GEN1;MAPK1;LEF1;NOSTRIN;H2AFX;RFX5;KLF7;AHR;NR4A3;HIST1H2BL;NUSAP1;HIST1H2BH;CERS6;ZBTB8A;TNFAIP3;EZH2;ZFP36L1;BNC2;RBPJ;HIST1H2BM;MYEF2;H2AFV;ZNF382;DR1;SIX1;FOXM1;SP7;CENPW;FOSB;ZNF827;STAT2;TFDP1;JUN;MB21D1;TBX2;MYC;ABL1;TOP2A;VDR;HJURP;TLR8	1	3.8e-10	1
GO:0004984	olfactory receptor activity	http://amigo.geneontology.org/amigo/term/GO:0004984	1	1128	422	16560	0.0339323	162998	OR7D2	1	3.28e-13	1
