# Supplementary material for: lnc-SAMD14-4 can regulate expression of the COL1A1 and COL1A2 in human chondrocytes
Source: PeerJ. 2019 Sep 2;7:e7491. doi: 10.7717/peerj.7491 (PMC6727836; doi:10.7717/peerj.7491)
Supplement: Table S9 [file peerj-07-7491-s015.xlsx]

## Sheet: Supplementary Table 8
Term_ID	Term_description	Term_url	ListHit	ListTotal	PopHit	PopTotal	FoldEnrichment	Genes	GeneSymbols	P_value	"-log10(pvalue)"	FDR_bh
GO:0005929	cilium	http://amigo.geneontology.org/amigo/term/GO:0005929	11	442	108	17682	4.153	23639;51382;4653;79739;27019;118491;221322;27031;8100;5311;127602	LRRC6;ATP6V1D;MYOC;TTLL7;DNAI1;CFAP70;TBC1D32;NPHP3;IFT88;PKD2;DNAH14	0.000158931	3.79879	0.0460901
GO:0043197	dendritic spine	http://amigo.geneontology.org/amigo/term/GO:0043197	9	442	97	17682	3.76812	4983;2823;8898;83992;9572;26037;56899;154;134	OPHN1;GPM6A;MTMR2;CTTNBP2;NR1D1;SIPA1L1;ANKS1B;ADRB2;ADORA1	0.00114518	2.94113	0.1562
GO:0005578	proteinaceous extracellular matrix	http://amigo.geneontology.org/amigo/term/GO:0005578	15	442	241	17682	2.54225	176;10082;2262;5265;7079;7049;1116;60495;4653;4256;2822;9719;79625;57188;8838	ACAN;GPC6;GPC5;SERPINA1;TIMP4;TGFBR3;CHI3L1;HPSE2;MYOC;MGP;GPLD1;ADAMTSL2;NDNF;ADAMTSL3;WISP3	0.00161586	2.79159	0.1562
GO:0005890	sodium:potassium-exchanging ATPase complex	http://amigo.geneontology.org/amigo/term/GO:0005890	3	442	11	17682	10.978	481;5348;482	ATP1B1;FXYD1;ATP1B2	0.00429199	2.36734	0.31117
GO:0000808	origin recognition complex	http://amigo.geneontology.org/amigo/term/GO:0000808	2	442	6	17682	13.3909	5000;23595	ORC4;ORC3	0.015074	1.82177	0.645742
GO:0042383	sarcolemma	http://amigo.geneontology.org/amigo/term/GO:0042383	6	442	83	17682	2.91793	481;5348;6442;6833;5588;154	ATP1B1;FXYD1;SGCA;ABCC8;PRKCQ;ADRB2	0.0216438	1.66467	0.645742
GO:0005575	cellular_component	http://amigo.geneontology.org/amigo/term/GO:0005575	20	442	484	17682	1.68403	54798;23469;51734;653483;758;4293;10231;26238;89894;56977;1154;340307;376940;26037;494143;54532;123283;81888;92106;58496	DCHS2;PHF3;MSRB1;MLLT4-AS1;MPPED1;MAP3K9;RCAN2;LINC01558;TMEM116;STOX2;CISH;CTAGE6;ZC3H6;SIPA1L1;CHAC2;USP53;TARSL2;HYI;OXNAD1;LY6G5B	0.0231377	1.63568	0.645742
GO:0030868	smooth endoplasmic reticulum membrane	http://amigo.geneontology.org/amigo/term/GO:0030868	2	442	8	17682	10.042	258010;55014	SVIP;STX17	0.0234583	1.6297	0.645742
GO:0005664	nuclear origin of replication recognition complex	http://amigo.geneontology.org/amigo/term/GO:0005664	2	442	9	17682	8.92576	5000;23595	ORC4;ORC3	0.0282148	1.54952	0.645742
GO:0031512	motile primary cilium	http://amigo.geneontology.org/amigo/term/GO:0031512	2	442	9	17682	8.92576	8100;5311	IFT88;PKD2	0.0282148	1.54952	0.645742
GO:0031012	extracellular matrix	http://amigo.geneontology.org/amigo/term/GO:0031012	9	442	168	17682	2.16686	176;1191;4653;4256;2263;6649;79625;1634;25890	ACAN;CLU;MYOC;MGP;FGFR2;SOD3;NDNF;DCN;ABI3BP	0.0298631	1.52486	0.645742
GO:0005615	extracellular space	http://amigo.geneontology.org/amigo/term/GO:0005615	42	442	1243	17682	1.38865	5274;10082;2262;25884;55959;5265;7079;7049;727;10551;6285;93099;6284;1116;710;8614;5744;3815;4254;8741;54360;5446;1191;10878;3075;22901;80274;4653;347;83888;3818;692094;51704;84417;2487;2822;6649;2878;1634;25890;8838;9723	SERPINI1;GPC6;GPC5;CHRDL2;SULF2;SERPINA1;TIMP4;TGFBR3;C5;AGR2;S100B;DMKN;S100A13;CHI3L1;SERPING1;STC2;PTHLH;KIT;KITLG;TNFSF13;CYTL1;PON3;CLU;CFHR3;CFH;ARSG;SCUBE1;MYOC;APOD;FGFBP2;KLKB1;MSMP;GPRC5B;C2orf40;FRZB;GPLD1;SOD3;GPX3;DCN;ABI3BP;WISP3;SEMA3E	0.0322335	1.49169	0.645742
GO:0060170	ciliary membrane	http://amigo.geneontology.org/amigo/term/GO:0060170	4	442	46	17682	3.50129	79583;259292;5311;6337	TMEM231;TAS2R46;PKD2;SCNN1A	0.0333009	1.47754	0.645742
GO:0097440	apical dendrite	http://amigo.geneontology.org/amigo/term/GO:0097440	2	442	10	17682	8.03273	22849;1191	CPEB3;CLU	0.0333198	1.4773	0.645742
GO:0014069	postsynaptic density	http://amigo.geneontology.org/amigo/term/GO:0014069	7	442	121	17682	2.33546	2059;5332;27445;8777;26037;56899;134	EPS8;PLCB4;PCLO;MPDZ;SIPA1L1;ANKS1B;ADORA1	0.0374516	1.42653	0.645742
GO:0043186	P granule	http://amigo.geneontology.org/amigo/term/GO:0043186	2	442	11	17682	7.30207	221400;55124	TDRD6;PIWIL2	0.0387536	1.41169	0.645742
GO:0043220	Schmidt-Lanterman incisure	http://amigo.geneontology.org/amigo/term/GO:0043220	2	442	11	17682	7.30207	400746;8777	NCMAP;MPDZ	0.0387536	1.41169	0.645742
GO:0070062	extracellular exosome	http://amigo.geneontology.org/amigo/term/GO:0070062	83	442	2758	17682	1.25105	79083;85477;5274;6584;55890;51678;83657;316;6204;5265;57447;56898;6819;7049;727;2059;5590;481;3875;81617;11127;55075;7068;2823;2053;1832;81539;93099;27445;26577;6284;1116;710;1474;1491;27163;8741;10529;340542;258010;8895;10840;5446;1191;51382;8898;10878;3075;11212;79612;317772;4653;347;2953;3700;441432;3818;4256;10207;51704;6135;6767;60676;201931;22837;5172;3778;2822;118491;119391;6649;56963;6168…	MLPH;SCIN;SERPINI1;SLC22A5;GPRC5C;MPP6;DYNLRB2;AOX1;RPS10;SERPINA1;NDRG2;BDH2;SULT1C2;TGFBR3;C5;EPS8;PRKCZ;ATP1B1;KRT18;CAB39L;KIF3A;UACA;THRB;GPM6A;EPHX2;DSP;SLC38A1;DMKN;PCLO;PCOLCE2;S100A13;CHI3L1;SERPING1;CST6;CTH;NAAA;TNFSF13;NEBL;BEX5;SVIP;CPNE3;ALDH1L1;PON3;CLU;ATP6V1D;MTMR2;CFHR3;CFH;PROSC;NAA16;HIST2H2AB;MYOC;APOD;GSTT2;ITIH4;AQP7P3;KLKB1;MGP;INADL;GPRC5B;RPL11;ST13;PAPPA2;TMEM192;COBLL1…	0.0424025	1.37261	0.645742
GO:0043235	receptor complex	http://amigo.geneontology.org/amigo/term/GO:0043235	7	442	125	17682	2.26021	55890;7049;4915;51555;7048;4306;154	GPRC5C;TGFBR3;NTRK2;PEX5L;TGFBR2;NR3C2;ADRB2	0.0430658	1.36587	0.645742
GO:0048471	perinuclear region of cytoplasm	http://amigo.geneontology.org/amigo/term/GO:0048471	22	442	596	17682	1.50165	79083;4135;57447;5590;3875;6285;7164;6284;1116;5071;8614;51191;8326;1191;26191;347;1780;10207;201931;4501;81618;10103	MLPH;MAP6;NDRG2;PRKCZ;KRT18;S100B;TPD52L1;S100A13;CHI3L1;PARK2;STC2;HERC5;FZD9;CLU;PTPN22;APOD;DYNC1I1;INADL;TMEM192;MT1X;ITM2C;TSPAN1	0.049966	1.30133	0.645742
GO:0033391	chromatoid body	http://amigo.geneontology.org/amigo/term/GO:0033391	2	442	13	17682	6.17797	221400;55124	TDRD6;PIWIL2	0.0505323	1.29643	0.645742
GO:0030425	dendrite	http://amigo.geneontology.org/amigo/term/GO:0030425	12	442	284	17682	1.7096	79083;22849;5332;5935;10371;51555;8777;108;8898;347;79739;9572	MLPH;CPEB3;PLCB4;RBM3;SEMA3A;PEX5L;MPDZ;ADCY2;MTMR2;APOD;TTLL7;NR1D1	0.0599245	1.2224	0.645742
GO:0005868	cytoplasmic dynein complex	http://amigo.geneontology.org/amigo/term/GO:0005868	2	442	15	17682	5.35364	83657;1780	DYNLRB2;DYNC1I1	0.0634076	1.19786	0.645742
GO:0030014	CCR4-NOT complex	http://amigo.geneontology.org/amigo/term/GO:0030014	2	442	15	17682	5.35364	10140;22849	TOB1;CPEB3	0.0634076	1.19786	0.645742
GO:0031514	motile cilium	http://amigo.geneontology.org/amigo/term/GO:0031514	4	442	58	17682	2.775	347732;9576;8100;6337	CATSPER3;SPAG6;IFT88;SCNN1A	0.0644942	1.19048	0.645742
GO:0005923	bicellular tight junction	http://amigo.geneontology.org/amigo/term/GO:0005923	6	442	110	17682	2.19833	65266;5590;8777;11149;10207;9069	WNK4;PRKCZ;MPDZ;BVES;INADL;CLDN12	0.0646549	1.1894	0.645742
GO:0031225	anchored component of membrane	http://amigo.geneontology.org/amigo/term/GO:0031225	6	442	111	17682	2.1784	10082;2262;1271;258010;51299;56963	GPC6;GPC5;CNTFR;SVIP;NRN1;RGMA	0.0668219	1.17508	0.645742
GO:0005856	cytoskeleton	http://amigo.geneontology.org/amigo/term/GO:0005856	14	442	354	17682	1.60114	85477;144535;55075;7111;27445;8418;26249;4254;339855;5608;6442;79739;27019;26037	SCIN;CFAP54;UACA;TMOD1;PCLO;CMAHP;KLHL3;KITLG;KY;MAP2K6;SGCA;TTLL7;DNAI1;SIPA1L1	0.0680802	1.16698	0.645742
GO:0043195	terminal bouton	http://amigo.geneontology.org/amigo/term/GO:0043195	4	442	60	17682	2.68219	4983;4915;3778;134	OPHN1;NTRK2;KCNMA1;ADORA1	0.0707886	1.15004	0.645742
GO:0005737	cytoplasm	http://amigo.geneontology.org/amigo/term/GO:0005737	135	442	4820	17682	1.17343	85477;5295;23639;10653;57718;80005;56271;25884;316;394;6204;10140;55536;2948;2944;65266;23368;1825;57447;56898;6819;80127;7049;51734;22849;825;10370;5590;3875;26166;367;84073;55075;5935;10000;51265;2053;221400;340895;1832;6285;7164;81550;6720;6284;80817;1116;5071;84707;8418;64067;122622;5592;9666;49855;5000;9129;10231;55540;8777;22909;1491;5744;55283;51191;5063;4254;27163;122773;8741;108;5608;340…	SCIN;PIK3R1;LRRC6;SPINT2;PPP4R4;DOCK5;BEX4;CHRDL2;AOX1;ARHGAP5;RPS10;TOB1;CDCA7L;GSTM4;GSTM1;WNK4;PPP1R13B;DSC3;NDRG2;BDH2;SULT1C2;CCDC176;TGFBR3;MSRB1;CPEB3;CAPN3;CITED2;PRKCZ;KRT18;RGS22;AR;MYCBPAP;UACA;RBM3;AKT3;CDKL3;EPHX2;TDRD6;MALRD1;DSP;S100B;TPD52L1;TDRD3;SREBF1;S100A13;CEP44;CHI3L1;PARK2;BEX2;CMAHP;NPAS3;ADSSL1;PRKG1;DZIP3;SCAPER;ORC4;PRPF3;RCAN2;IL17RB;MPDZ;FAN1;CTH;PTHLH;MCOLN3;HERC5;P…	0.071134	1.14792	0.645742
GO:0005938	cell cortex	http://amigo.geneontology.org/amigo/term/GO:0005938	6	442	116	17682	2.08391	85477;2059;10129;4289;83992;2263	SCIN;EPS8;FRY;MKLN1;CTTNBP2;FGFR2	0.0782849	1.10632	0.645742
GO:0016324	apical plasma membrane	http://amigo.geneontology.org/amigo/term/GO:0016324	11	442	267	17682	1.66467	6584;5590;481;1271;8777;10207;482;5172;3778;154;6337	SLC22A5;PRKCZ;ATP1B1;CNTFR;MPDZ;INADL;ATP1B2;SLC26A4;KCNMA1;ADRB2;SCNN1A	0.0794822	1.09973	0.645742
GO:0005783	endoplasmic reticulum	http://amigo.geneontology.org/amigo/term/GO:0005783	26	442	772	17682	1.36901	55959;5265;94103;347732;10551;221400;6720;1116;5071;9852;49855;8614;1191;22901;4653;347;51754;201931;29121;3778;56963;445;134;100506742;5311;254887	SULF2;SERPINA1;ORMDL3;CATSPER3;AGR2;TDRD6;SREBF1;CHI3L1;PARK2;EPM2AIP1;SCAPER;STC2;CLU;ARSG;MYOC;APOD;TMEM8B;TMEM192;CLEC2D;KCNMA1;RGMA;ASS1;ADORA1;CASP12;PKD2;ZDHHC23	0.0823828	1.08416	0.645742
GO:0005796	Golgi lumen	http://amigo.geneontology.org/amigo/term/GO:0005796	5	442	90	17682	2.23646	176;10082;2262;6649;1634	ACAN;GPC6;GPC5;SOD3;DCN	0.0827343	1.08231	0.645742
GO:0005815	microtubule organizing center	http://amigo.geneontology.org/amigo/term/GO:0005815	6	442	123	17682	1.96453	57447;5590;3875;55791;10129;10579	NDRG2;PRKCZ;KRT18;LRIF1;FRY;TACC2	0.0960719	1.0174	0.645742
GO:0042645	mitochondrial nucleoid	http://amigo.geneontology.org/amigo/term/GO:0042645	3	442	42	17682	2.87016	80298;1629;7978	MTERF2;DBT;MTERF1	0.0965735	1.01514	0.645742
GO:0031674	I band	http://amigo.geneontology.org/amigo/term/GO:0031674	2	442	20	17682	4.01409	8850;10529	KAT2B;NEBL	0.0995486	1.00197	0.645742
GO:0097542	ciliary tip	http://amigo.geneontology.org/amigo/term/GO:0097542	3	442	43	17682	2.80325	83657;11127;8100	DYNLRB2;KIF3A;IFT88	0.101536	0.993378	0.645742
GO:0005901	caveola	http://amigo.geneontology.org/amigo/term/GO:0005901	4	442	70	17682	2.29772	481;5348;7048;3778	ATP1B1;FXYD1;TGFBR2;KCNMA1	0.106663	0.971986	0.645742
GO:0042629	mast cell granule	http://amigo.geneontology.org/amigo/term/GO:0042629	2	442	21	17682	3.82273	6284;3815	S100A13;KIT	0.107338	0.969247	0.645742
GO:0031526	brush border membrane	http://amigo.geneontology.org/amigo/term/GO:0031526	3	442	45	17682	2.67836	6584;5172;79901	SLC22A5;SLC26A4;CYBRD1	0.111758	0.951721	0.645742
GO:0005911	cell-cell junction	http://amigo.geneontology.org/amigo/term/GO:0005911	7	442	159	17682	1.77345	5295;1825;5590;10076;3815;6442;5311	PIK3R1;DSC3;PRKCZ;PTPRU;KIT;SGCA;PKD2	0.112223	0.94992	0.645742
GO:0031941	filamentous actin	http://amigo.geneontology.org/amigo/term/GO:0031941	2	442	22	17682	3.64876	5590;5311	PRKCZ;PKD2	0.115283	0.938233	0.645742
GO:0015630	microtubule cytoskeleton	http://amigo.geneontology.org/amigo/term/GO:0015630	6	442	132	17682	1.82965	11127;9576;6674;10579;10472;152815	KIF3A;SPAG6;SPAG1;TACC2;ZBTB18;THAP6	0.121822	0.914273	0.645742
GO:0043202	lysosomal lumen	http://amigo.geneontology.org/amigo/term/GO:0043202	4	442	74	17682	2.17302	176;10082;2262;1634	ACAN;GPC6;GPC5;DCN	0.122924	0.910365	0.645742
GO:0030057	desmosome	http://amigo.geneontology.org/amigo/term/GO:0030057	2	442	23	17682	3.48992	1825;1832	DSC3;DSP	0.123373	0.90878	0.645742
GO:0001533	cornified envelope	http://amigo.geneontology.org/amigo/term/GO:0001533	2	442	23	17682	3.48992	1832;1474	DSP;CST6	0.123373	0.90878	0.645742
GO:0031093	platelet alpha granule lumen	http://amigo.geneontology.org/amigo/term/GO:0031093	3	442	48	17682	2.51054	5265;710;1191	SERPINA1;SERPING1;CLU	0.127785	0.893522	0.645742
GO:0015030	Cajal body	http://amigo.geneontology.org/amigo/term/GO:0015030	3	442	49	17682	2.45916	9129;56899;2091	PRPF3;ANKS1B;FBL	0.133299	0.875172	0.645742
GO:0001650	fibrillar center	http://amigo.geneontology.org/amigo/term/GO:0001650	1	442	5	17682	8.01678	51386	EIF3L	0.137707	0.861045	0.645742
GO:0036157	outer dynein arm	http://amigo.geneontology.org/amigo/term/GO:0036157	1	442	5	17682	8.01678	27019	DNAI1	0.137707	0.861045	0.645742
GO:0044300	cerebellar mossy fiber	http://amigo.geneontology.org/amigo/term/GO:0044300	1	442	5	17682	8.01678	4781	NFIB	0.137707	0.861045	0.645742
GO:1990246	uniplex complex	http://amigo.geneontology.org/amigo/term/GO:1990246	1	442	5	17682	8.01678	91689	SMDT1	0.137707	0.861045	0.645742
GO:0031428	box C/D snoRNP complex	http://amigo.geneontology.org/amigo/term/GO:0031428	1	442	5	17682	8.01678	2091	FBL	0.137707	0.861045	0.645742
GO:0071797	LUBAC complex	http://amigo.geneontology.org/amigo/term/GO:0071797	1	442	5	17682	8.01678	5071	PARK2	0.137707	0.861045	0.645742
GO:0060091	kinocilium	http://amigo.geneontology.org/amigo/term/GO:0060091	1	442	5	17682	8.01678	8100	IFT88	0.137707	0.861045	0.645742
GO:0072557	IPAF inflammasome complex	http://amigo.geneontology.org/amigo/term/GO:0072557	1	442	5	17682	8.01678	100506742	CASP12	0.137707	0.861045	0.645742
GO:0005784	Sec61 translocon complex	http://amigo.geneontology.org/amigo/term/GO:0005784	1	442	5	17682	8.01678	6747	SSR3	0.137707	0.861045	0.645742
GO:0031415	NatA complex	http://amigo.geneontology.org/amigo/term/GO:0031415	1	442	5	17682	8.01678	79612	NAA16	0.137707	0.861045	0.645742
GO:0005903	brush border	http://amigo.geneontology.org/amigo/term/GO:0005903	3	442	50	17682	2.40984	85477;2059;51181	SCIN;EPS8;DCXR	0.138896	0.857311	0.645742
GO:0045211	postsynaptic membrane	http://amigo.geneontology.org/amigo/term/GO:0045211	8	442	201	17682	1.60314	4915;8165;8777;25945;3778;26037;56899;134	NTRK2;AKAP1;MPDZ;PVRL3;KCNMA1;SIPA1L1;ANKS1B;ADORA1	0.139922	0.854113	0.645742
GO:0030018	Z disc	http://amigo.geneontology.org/amigo/term/GO:0030018	5	442	108	17682	1.86181	825;91977;339855;10529;51778	CAPN3;MYOZ3;KY;NEBL;MYOZ2	0.142533	0.846086	0.645742
GO:0072372	primary cilium	http://amigo.geneontology.org/amigo/term/GO:0072372	4	442	79	17682	2.03491	83657;11127;27031;8100	DYNLRB2;KIF3A;NPHP3;IFT88	0.144621	0.83977	0.645742
GO:0000125	PCAF complex	http://amigo.geneontology.org/amigo/term/GO:0000125	1	442	6	17682	6.68027	8850	KAT2B	0.158743	0.799306	0.645742
GO:0016012	sarcoglycan complex	http://amigo.geneontology.org/amigo/term/GO:0016012	1	442	6	17682	6.68027	6442	SGCA	0.158743	0.799306	0.645742
GO:0035748	myelin sheath abaxonal region	http://amigo.geneontology.org/amigo/term/GO:0035748	1	442	6	17682	6.68027	5590	PRKCZ	0.158743	0.799306	0.645742
GO:0071546	pi-body	http://amigo.geneontology.org/amigo/term/GO:0071546	1	442	6	17682	6.68027	55124	PIWIL2	0.158743	0.799306	0.645742
GO:0097433	dense body	http://amigo.geneontology.org/amigo/term/GO:0097433	1	442	6	17682	6.68027	55124	PIWIL2	0.158743	0.799306	0.645742
GO:0045180	basal cortex	http://amigo.geneontology.org/amigo/term/GO:0045180	1	442	6	17682	6.68027	5311	PKD2	0.158743	0.799306	0.645742
GO:0097169	AIM2 inflammasome complex	http://amigo.geneontology.org/amigo/term/GO:0097169	1	442	6	17682	6.68027	100506742	CASP12	0.158743	0.799306	0.645742
GO:0071458	integral component of cytoplasmic side of endoplasmic reticulum membrane	http://amigo.geneontology.org/amigo/term/GO:0071458	1	442	6	17682	6.68027	5311	PKD2	0.158743	0.799306	0.645742
GO:0005759	mitochondrial matrix	http://amigo.geneontology.org/amigo/term/GO:0005759	10	442	275	17682	1.46524	549;80298;8165;1629;137872;7915;23417;7978;33;10157	AUH;MTERF2;AKAP1;DBT;ADHFE1;ALDH5A1;MLYCD;MTERF1;ACADL;AASS	0.160322	0.795007	0.645742
GO:0005667	transcription factor complex	http://amigo.geneontology.org/amigo/term/GO:0005667	7	442	178	17682	1.58244	8861;79612;10625;7029;55859;9443;8538	LDB1;NAA16;IVNS1ABP;TFDP2;BEX1;MED7;BARX2	0.167067	0.777109	0.649843
GO:0000790	nuclear chromatin	http://amigo.geneontology.org/amigo/term/GO:0000790	6	442	148	17682	1.63036	8861;8850;10370;367;7068;9572	LDB1;KAT2B;CITED2;AR;THRB;NR1D1	0.174895	0.757223	0.649843
GO:0044233	ER-mitochondrion membrane contact site	http://amigo.geneontology.org/amigo/term/GO:0044233	1	442	7	17682	5.72562	55014	STX17	0.179267	0.7465	0.649843
GO:0045179	apical cortex	http://amigo.geneontology.org/amigo/term/GO:0045179	1	442	7	17682	5.72562	5590	PRKCZ	0.179267	0.7465	0.649843
GO:0072559	NLRP3 inflammasome complex	http://amigo.geneontology.org/amigo/term/GO:0072559	1	442	7	17682	5.72562	100506742	CASP12	0.179267	0.7465	0.649843
GO:0042587	glycogen granule	http://amigo.geneontology.org/amigo/term/GO:0042587	1	442	7	17682	5.72562	90673	PPP1R3E	0.179267	0.7465	0.649843
GO:0005579	membrane attack complex	http://amigo.geneontology.org/amigo/term/GO:0005579	1	442	7	17682	5.72562	727	C5	0.179267	0.7465	0.649843
GO:0043203	axon hillock	http://amigo.geneontology.org/amigo/term/GO:0043203	1	442	7	17682	5.72562	5590	PRKCZ	0.179267	0.7465	0.649843
GO:0030016	myofibril	http://amigo.geneontology.org/amigo/term/GO:0030016	2	442	31	17682	2.58812	825;7111	CAPN3;TMOD1	0.191962	0.716785	0.682369
GO:0022626	cytosolic ribosome	http://amigo.geneontology.org/amigo/term/GO:0022626	1	442	8	17682	5.00964	347	APOD	0.199292	0.700511	0.682369
GO:0070852	cell body fiber	http://amigo.geneontology.org/amigo/term/GO:0070852	1	442	8	17682	5.00964	445	ASS1	0.199292	0.700511	0.682369
GO:0034366	spherical high-density lipoprotein particle	http://amigo.geneontology.org/amigo/term/GO:0034366	1	442	8	17682	5.00964	1191	CLU	0.199292	0.700511	0.682369
GO:0009925	basal plasma membrane	http://amigo.geneontology.org/amigo/term/GO:0009925	2	442	32	17682	2.5071	5311;4233	PKD2;MET	0.200875	0.697075	0.682369
GO:0030864	cortical actin cytoskeleton	http://amigo.geneontology.org/amigo/term/GO:0030864	2	442	33	17682	2.43099	130271;6337	PLEKHH2;SCNN1A	0.209834	0.678124	0.682369
GO:0005622	intracellular	http://amigo.geneontology.org/amigo/term/GO:0005622	17	442	544	17682	1.26015	55351;825;481;4882;4293;11201;79754;9077;221002;108;378108;1191;60495;11212;60676;2822;132946	STK32B;CAPN3;ATP1B1;NPR2;MAP3K9;POLI;ASB13;DIRAS3;RASGEF1A;ADCY2;TRIM74;CLU;HPSE2;PROSC;PAPPA2;GPLD1;ARL9	0.211717	0.674244	0.682369
GO:0036128	CatSper complex	http://amigo.geneontology.org/amigo/term/GO:0036128	1	442	9	17682	4.45276	347732	CATSPER3	0.218829	0.659896	0.682369
GO:0005832	chaperonin-containing T-complex	http://amigo.geneontology.org/amigo/term/GO:0005832	1	442	9	17682	4.45276	10693	CCT6B	0.218829	0.659896	0.682369
GO:0000812	Swr1 complex	http://amigo.geneontology.org/amigo/term/GO:0000812	1	442	9	17682	4.45276	10902	BRD8	0.218829	0.659896	0.682369
GO:0030061	mitochondrial crista	http://amigo.geneontology.org/amigo/term/GO:0030061	1	442	9	17682	4.45276	8165	AKAP1	0.218829	0.659896	0.682369
GO:0036513	Derlin-1 retrotranslocation complex	http://amigo.geneontology.org/amigo/term/GO:0036513	1	442	9	17682	4.45276	258010	SVIP	0.218829	0.659896	0.682369
GO:0032279	asymmetric synapse	http://amigo.geneontology.org/amigo/term/GO:0032279	1	442	9	17682	4.45276	134	ADORA1	0.218829	0.659896	0.682369
GO:0009897	external side of plasma membrane	http://amigo.geneontology.org/amigo/term/GO:0009897	7	442	197	17682	1.42826	7049;7048;3815;8741;80274;3778;6337	TGFBR3;TGFBR2;KIT;TNFSF13;SCUBE1;KCNMA1;SCNN1A	0.231446	0.635551	0.682397
GO:0043296	apical junction complex	http://amigo.geneontology.org/amigo/term/GO:0043296	1	442	10	17682	4.00726	25945	PVRL3	0.23789	0.623624	0.682397
GO:0097225	sperm midpiece	http://amigo.geneontology.org/amigo/term/GO:0097225	1	442	10	17682	4.00726	79925	SPEF2	0.23789	0.623624	0.682397
GO:0005858	axonemal dynein complex	http://amigo.geneontology.org/amigo/term/GO:0005858	1	442	10	17682	4.00726	1768	DNAH6	0.23789	0.623624	0.682397
GO:0005942	phosphatidylinositol 3-kinase complex	http://amigo.geneontology.org/amigo/term/GO:0005942	1	442	10	17682	4.00726	5295	PIK3R1	0.23789	0.623624	0.682397
GO:0005865	striated muscle thin filament	http://amigo.geneontology.org/amigo/term/GO:0005865	1	442	10	17682	4.00726	7111	TMOD1	0.23789	0.623624	0.682397
GO:0030877	beta-catenin destruction complex	http://amigo.geneontology.org/amigo/term/GO:0030877	1	442	10	17682	4.00726	51339	DACT1	0.23789	0.623624	0.682397
GO:0072562	blood microparticle	http://amigo.geneontology.org/amigo/term/GO:0072562	5	442	132	17682	1.52122	710;1191;10878;3075;3700	SERPING1;CLU;CFHR3;CFH;ITIH4	0.242934	0.614511	0.682397
GO:0030017	sarcomere	http://amigo.geneontology.org/amigo/term/GO:0030017	2	442	37	17682	2.16769	7079;51778	TIMP4;MYOZ2	0.245992	0.609079	0.682397
GO:0031982	vesicle	http://amigo.geneontology.org/amigo/term/GO:0031982	4	442	100	17682	1.60566	55890;2059;1780;10103	GPRC5C;EPS8;DYNC1I1;TSPAN1	0.248653	0.604406	0.682397
GO:0033270	paranode region of axon	http://amigo.geneontology.org/amigo/term/GO:0033270	1	442	11	17682	3.64275	400746	NCMAP	0.256487	0.590934	0.682397
GO:0017146	NMDA selective glutamate receptor complex	http://amigo.geneontology.org/amigo/term/GO:0017146	1	442	11	17682	3.64275	2059	EPS8	0.256487	0.590934	0.682397
GO:0031672	A band	http://amigo.geneontology.org/amigo/term/GO:0031672	1	442	11	17682	3.64275	8850	KAT2B	0.256487	0.590934	0.682397
GO:0016327	apicolateral plasma membrane	http://amigo.geneontology.org/amigo/term/GO:0016327	1	442	11	17682	3.64275	8777	MPDZ	0.256487	0.590934	0.682397
GO:0031904	endosome lumen	http://amigo.geneontology.org/amigo/term/GO:0031904	1	442	11	17682	3.64275	5618	PRLR	0.256487	0.590934	0.682397
GO:0005916	fascia adherens	http://amigo.geneontology.org/amigo/term/GO:0005916	1	442	11	17682	3.64275	1832	DSP	0.256487	0.590934	0.682397
GO:0012507	ER to Golgi transport vesicle membrane	http://amigo.geneontology.org/amigo/term/GO:0012507	2	442	39	17682	2.05629	6720;55014	SREBF1;STX17	0.264171	0.578115	0.69645
GO:0005845	mRNA cap binding complex	http://amigo.geneontology.org/amigo/term/GO:0005845	1	442	12	17682	3.339	317649	EIF4E3	0.274632	0.561249	0.698624
GO:0031588	AMP-activated protein kinase complex	http://amigo.geneontology.org/amigo/term/GO:0031588	1	442	12	17682	3.339	5563	PRKAA2	0.274632	0.561249	0.698624
GO:0030134	ER to Golgi transport vesicle	http://amigo.geneontology.org/amigo/term/GO:0030134	1	442	12	17682	3.339	55014	STX17	0.274632	0.561249	0.698624
GO:0042641	actomyosin	http://amigo.geneontology.org/amigo/term/GO:0042641	1	442	12	17682	3.339	8850	KAT2B	0.274632	0.561249	0.698624
GO:0045171	intercellular bridge	http://amigo.geneontology.org/amigo/term/GO:0045171	2	442	42	17682	1.90909	22909;10472	FAN1;ZBTB18	0.29143	0.535466	0.712411
GO:0030897	HOPS complex	http://amigo.geneontology.org/amigo/term/GO:0030897	1	442	13	17682	3.08198	55014	STX17	0.292334	0.53412	0.712411
GO:0043240	Fanconi anaemia nuclear complex	http://amigo.geneontology.org/amigo/term/GO:0043240	1	442	13	17682	3.08198	57697	FANCM	0.292334	0.53412	0.712411
GO:0044295	axonal growth cone	http://amigo.geneontology.org/amigo/term/GO:0044295	1	442	13	17682	3.08198	2823	GPM6A	0.292334	0.53412	0.712411
GO:0036038	TCTN-B9D complex	http://amigo.geneontology.org/amigo/term/GO:0036038	1	442	13	17682	3.08198	79583	TMEM231	0.292334	0.53412	0.712411
GO:0014704	intercalated disc	http://amigo.geneontology.org/amigo/term/GO:0014704	2	442	43	17682	1.86459	481;1832	ATP1B1;DSP	0.300493	0.522166	0.714673
GO:0009898	cytoplasmic side of plasma membrane	http://amigo.geneontology.org/amigo/term/GO:0009898	2	442	43	17682	1.86459	3815;26191	KIT;PTPN22	0.300493	0.522166	0.714673
GO:0005685	U1 snRNP	http://amigo.geneontology.org/amigo/term/GO:0005685	1	442	14	17682	2.86168	6626	SNRPA	0.309606	0.509191	0.714673
GO:0005614	interstitial matrix	http://amigo.geneontology.org/amigo/term/GO:0005614	1	442	14	17682	2.86168	25890	ABI3BP	0.309606	0.509191	0.714673
GO:0097060	synaptic membrane	http://amigo.geneontology.org/amigo/term/GO:0097060	1	442	14	17682	2.86168	8898	MTMR2	0.309606	0.509191	0.714673
GO:0005764	lysosome	http://amigo.geneontology.org/amigo/term/GO:0005764	7	442	219	17682	1.28317	23461;27163;22901;201931;445;154;81618	ABCA5;NAAA;ARSG;TMEM192;ASS1;ADRB2;ITM2C	0.314307	0.502645	0.714673
GO:0005791	rough endoplasmic reticulum	http://amigo.geneontology.org/amigo/term/GO:0005791	2	442	45	17682	1.78152	4653;55014	MYOC;STX17	0.318556	0.496814	0.714673
GO:0005913	cell-cell adherens junction	http://amigo.geneontology.org/amigo/term/GO:0005913	2	442	45	17682	1.78152	150709;25945	ANKAR;PVRL3	0.318556	0.496814	0.714673
GO:0005671	Ada2/Gcn5/Ada3 transcription activator complex	http://amigo.geneontology.org/amigo/term/GO:0005671	1	442	15	17682	2.67075	8850	KAT2B	0.326457	0.486174	0.714673
GO:0030673	axolemma	http://amigo.geneontology.org/amigo/term/GO:0030673	1	442	15	17682	2.67075	134	ADORA1	0.326457	0.486174	0.714673
GO:0033268	node of Ranvier	http://amigo.geneontology.org/amigo/term/GO:0033268	1	442	15	17682	2.67075	4653	MYOC	0.326457	0.486174	0.714673
GO:0033290	eukaryotic 48S preinitiation complex	http://amigo.geneontology.org/amigo/term/GO:0033290	1	442	15	17682	2.67075	51386	EIF3L	0.326457	0.486174	0.714673
GO:0016282	eukaryotic 43S preinitiation complex	http://amigo.geneontology.org/amigo/term/GO:0016282	1	442	15	17682	2.67075	51386	EIF3L	0.326457	0.486174	0.714673
GO:0043231	intracellular membrane-bounded organelle	http://amigo.geneontology.org/amigo/term/GO:0043231	14	442	483	17682	1.16477	164045;79608;23461;6285;11201;79366;1577;5446;10349;51704;2263;875;2822;10157	HFM1;RIC3;ABCA5;S100B;POLI;HMGN5;CYP3A5;PON3;ABCA10;GPRC5B;FGFR2;CBS;GPLD1;AASS	0.32872	0.483174	0.714673
GO:0030286	dynein complex	http://amigo.geneontology.org/amigo/term/GO:0030286	1	442	16	17682	2.50368	127602	DNAH14	0.342897	0.464836	0.714673
GO:0016010	dystrophin-associated glycoprotein complex	http://amigo.geneontology.org/amigo/term/GO:0016010	1	442	16	17682	2.50368	6442	SGCA	0.342897	0.464836	0.714673
GO:0005852	eukaryotic translation initiation factor 3 complex	http://amigo.geneontology.org/amigo/term/GO:0005852	1	442	16	17682	2.50368	51386	EIF3L	0.342897	0.464836	0.714673
GO:0002080	acrosomal membrane	http://amigo.geneontology.org/amigo/term/GO:0002080	1	442	16	17682	2.50368	8100	IFT88	0.342897	0.464836	0.714673
GO:0035869	ciliary transition zone	http://amigo.geneontology.org/amigo/term/GO:0035869	1	442	16	17682	2.50368	79583	TMEM231	0.342897	0.464836	0.714673
GO:0036064	ciliary basal body	http://amigo.geneontology.org/amigo/term/GO:0036064	3	442	82	17682	1.46675	80127;8100;5311	CCDC176;IFT88;PKD2	0.343321	0.4643	0.714673
GO:0016328	lateral plasma membrane	http://amigo.geneontology.org/amigo/term/GO:0016328	2	442	48	17682	1.66989	11149;9069	BVES;CLDN12	0.345429	0.461641	0.714673
GO:0005739	mitochondrion	http://amigo.geneontology.org/amigo/term/GO:0005739	33	442	1224	17682	1.08489	10350;56898;549;83857;55075;10551;80224;8165;9481;5071;1629;10840;1191;137872;11212;79877;7915;51754;80221;23417;7978;10902;2308;91574;55268;23576;586;33;55014;9443;10157;56624;92106	ABCA9;BDH2;AUH;TMTC1;UACA;AGR2;NUBPL;AKAP1;SLC25A27;PARK2;DBT;ALDH1L1;CLU;ADHFE1;PROSC;DCAKD;ALDH5A1;TMEM8B;ACSF2;MLYCD;MTERF1;BRD8;FOXO1;C12orf65;ECHDC2;DDAH1;BCAT1;ACADL;STX17;MED7;AASS;ASAH2;OXNAD1	0.354845	0.449962	0.714673
GO:0035267	NuA4 histone acetyltransferase complex	http://amigo.geneontology.org/amigo/term/GO:0035267	1	442	17	17682	2.35628	10902	BRD8	0.358938	0.444981	0.714673
GO:0005665	DNA-directed RNA polymerase II, core complex	http://amigo.geneontology.org/amigo/term/GO:0005665	1	442	17	17682	2.35628	10891	PPARGC1A	0.358938	0.444981	0.714673
GO:1903561	extracellular vesicle	http://amigo.geneontology.org/amigo/term/GO:1903561	2	442	50	17682	1.60291	481;2823	ATP1B1;GPM6A	0.363153	0.43991	0.714673
GO:0000139	Golgi membrane	http://amigo.geneontology.org/amigo/term/GO:0000139	14	442	497	17682	1.13104	93010;79608;55568;9955;23461;6720;9331;258010;10610;51435;2634;30815;117248;25849	B3GNT7;RIC3;GALNT10;HS3ST3A1;ABCA5;SREBF1;B4GALT6;SVIP;ST6GALNAC2;SCARA3;GBP2;ST6GALNAC6;GALNT15;PARM1	0.366406	0.436038	0.714673
GO:0008076	voltage-gated potassium channel complex	http://amigo.geneontology.org/amigo/term/GO:0008076	3	442	86	17682	1.39821	343450;6833;3778	KCNT2;ABCC8;KCNMA1	0.370018	0.431777	0.714673
GO:0031594	neuromuscular junction	http://amigo.geneontology.org/amigo/term/GO:0031594	2	442	51	17682	1.57139	8165;5588	AKAP1;PRKCQ	0.371948	0.429518	0.714673
GO:0031527	filopodium membrane	http://amigo.geneontology.org/amigo/term/GO:0031527	1	442	18	17682	2.22525	8326	FZD9	0.374587	0.426447	0.714673
GO:0030992	intraciliary transport particle B	http://amigo.geneontology.org/amigo/term/GO:0030992	1	442	18	17682	2.22525	8100	IFT88	0.374587	0.426447	0.714673
GO:0031513	nonmotile primary cilium	http://amigo.geneontology.org/amigo/term/GO:0031513	1	442	18	17682	2.22525	5311	PKD2	0.374587	0.426447	0.714673
GO:0031305	integral component of mitochondrial inner membrane	http://amigo.geneontology.org/amigo/term/GO:0031305	1	442	18	17682	2.22525	91689	SMDT1	0.374587	0.426447	0.714673
GO:0005657	replication fork	http://amigo.geneontology.org/amigo/term/GO:0005657	1	442	18	17682	2.22525	604	BCL6	0.374587	0.426447	0.714673
GO:0046540	U4/U6 x U5 tri-snRNP complex	http://amigo.geneontology.org/amigo/term/GO:0046540	1	442	19	17682	2.10801	9129	PRPF3	0.389855	0.409096	0.724839
GO:0032809	neuronal cell body membrane	http://amigo.geneontology.org/amigo/term/GO:0032809	1	442	19	17682	2.10801	154	ADRB2	0.389855	0.409096	0.724839
GO:0000795	synaptonemal complex	http://amigo.geneontology.org/amigo/term/GO:0000795	1	442	19	17682	2.10801	57820	CCNB1IP1	0.389855	0.409096	0.724839
GO:0005681	spliceosomal complex	http://amigo.geneontology.org/amigo/term/GO:0005681	3	442	89	17682	1.35085	9129;10625;6626	PRPF3;IVNS1ABP;SNRPA	0.389914	0.409032	0.724839
GO:0001726	ruffle	http://amigo.geneontology.org/amigo/term/GO:0001726	3	442	90	17682	1.33576	143903;6285;4289	LAYN;S100B;MKLN1	0.396512	0.401743	0.732411
GO:0060076	excitatory synapse	http://amigo.geneontology.org/amigo/term/GO:0060076	1	442	20	17682	2.00249	2263	FGFR2	0.404752	0.392811	0.733613
GO:0034451	centriolar satellite	http://amigo.geneontology.org/amigo/term/GO:0034451	1	442	20	17682	2.00249	3875	KRT18	0.404752	0.392811	0.733613
GO:0005774	vacuolar membrane	http://amigo.geneontology.org/amigo/term/GO:0005774	1	442	20	17682	2.00249	8898	MTMR2	0.404752	0.392811	0.733613
GO:0022625	cytosolic large ribosomal subunit	http://amigo.geneontology.org/amigo/term/GO:0022625	2	442	56	17682	1.43068	6135;6168	RPL11;RPL37A	0.415128	0.381817	0.736926
GO:0030863	cortical cytoskeleton	http://amigo.geneontology.org/amigo/term/GO:0030863	1	442	21	17682	1.90703	7111	TMOD1	0.419285	0.37749	0.736926
GO:0035861	site of double-strand break	http://amigo.geneontology.org/amigo/term/GO:0035861	1	442	21	17682	1.90703	200558	APLF	0.419285	0.37749	0.736926
GO:0019897	extrinsic component of plasma membrane	http://amigo.geneontology.org/amigo/term/GO:0019897	1	442	21	17682	1.90703	80274	SCUBE1	0.419285	0.37749	0.736926
GO:0000123	histone acetyltransferase complex	http://amigo.geneontology.org/amigo/term/GO:0000123	1	442	21	17682	1.90703	151050	KANSL1L	0.419285	0.37749	0.736926
GO:0005765	lysosomal membrane	http://amigo.geneontology.org/amigo/term/GO:0005765	7	442	248	17682	1.13124	23461;51382;201931;2822;81618;55014;10103	ABCA5;ATP6V1D;TMEM192;GPLD1;ITM2C;STX17;TSPAN1	0.429448	0.367089	0.743815
GO:0015629	actin cytoskeleton	http://amigo.geneontology.org/amigo/term/GO:0015629	6	442	210	17682	1.14495	4983;51734;55791;5000;10625;51778	OPHN1;MSRB1;LRIF1;ORC4;IVNS1ABP;MYOZ2	0.431732	0.364786	0.743815
GO:0030133	transport vesicle	http://amigo.geneontology.org/amigo/term/GO:0030133	2	442	58	17682	1.38119	84417;117248	C2orf40;GALNT15	0.431986	0.364531	0.743815
GO:0035145	exon-exon junction complex	http://amigo.geneontology.org/amigo/term/GO:0035145	1	442	22	17682	1.82024	81550	TDRD3	0.433465	0.363046	0.743815
GO:0036464	cytoplasmic ribonucleoprotein granule	http://amigo.geneontology.org/amigo/term/GO:0036464	1	442	23	17682	1.741	1780	DYNC1I1	0.447299	0.349402	0.763039
GO:0097546	ciliary base	http://amigo.geneontology.org/amigo/term/GO:0097546	1	442	24	17682	1.66837	8100	IFT88	0.460796	0.336492	0.768693
GO:0000421	autophagosome membrane	http://amigo.geneontology.org/amigo/term/GO:0000421	1	442	24	17682	1.66837	55014	STX17	0.460796	0.336492	0.768693
GO:0048786	presynaptic active zone	http://amigo.geneontology.org/amigo/term/GO:0048786	1	442	24	17682	1.66837	134	ADORA1	0.460796	0.336492	0.768693
GO:0000922	spindle pole	http://amigo.geneontology.org/amigo/term/GO:0000922	3	442	100	17682	1.2015	80817;10129;1780	CEP44;FRY;DYNC1I1	0.461216	0.336096	0.768693
GO:0001669	acrosomal vesicle	http://amigo.geneontology.org/amigo/term/GO:0001669	2	442	62	17682	1.29179	347732;3815	CATSPER3;KIT	0.464898	0.332642	0.770403
GO:0043025	neuronal cell body	http://amigo.geneontology.org/amigo/term/GO:0043025	8	442	297	17682	1.07899	79608;2823;6285;9481;347;5153;494513;134	RIC3;GPM6A;S100B;SLC25A27;APOD;PDE1B;DFNB59;ADORA1	0.467606	0.33012	0.770488
GO:0097481	neuronal postsynaptic density	http://amigo.geneontology.org/amigo/term/GO:0097481	2	442	65	17682	1.23196	4915;8898	NTRK2;MTMR2	0.488831	0.310841	0.80091
GO:0032420	stereocilium	http://amigo.geneontology.org/amigo/term/GO:0032420	1	442	27	17682	1.48274	2059	EPS8	0.499345	0.301599	0.8045
GO:0005790	smooth endoplasmic reticulum	http://amigo.geneontology.org/amigo/term/GO:0005790	1	442	27	17682	1.48274	5332	PLCB4	0.499345	0.301599	0.8045
GO:0031463	Cul3-RING ubiquitin ligase complex	http://amigo.geneontology.org/amigo/term/GO:0031463	1	442	27	17682	1.48274	26249	KLHL3	0.499345	0.301599	0.8045
GO:0005930	axoneme	http://amigo.geneontology.org/amigo/term/GO:0005930	2	442	67	17682	1.19505	144535;9576	CFAP54;SPAG6	0.50441	0.297216	0.808171
GO:0071556	integral component of lumenal side of endoplasmic reticulum membrane	http://amigo.geneontology.org/amigo/term/GO:0071556	1	442	28	17682	1.42971	5311	PKD2	0.511574	0.291092	0.811498
GO:0000776	kinetochore	http://amigo.geneontology.org/amigo/term/GO:0000776	2	442	68	17682	1.17741	8850;1780	KAT2B;DYNC1I1	0.512083	0.290659	0.811498
GO:0005770	late endosome	http://amigo.geneontology.org/amigo/term/GO:0005770	3	442	110	17682	1.09165	23461;201931;25849	ABCA5;TMEM192;PARM1	0.522755	0.281702	0.816799
GO:0009986	cell surface	http://amigo.geneontology.org/amigo/term/GO:0009986	13	442	515	17682	1.01012	55959;7049;143903;55540;8326;1191;80274;51754;51704;29121;2263;5618;4233	SULF2;TGFBR3;LAYN;IL17RB;FZD9;CLU;SCUBE1;TMEM8B;GPRC5B;CLEC2D;FGFR2;PRLR;MET	0.525889	0.279106	0.816799
GO:0031966	mitochondrial membrane	http://amigo.geneontology.org/amigo/term/GO:0031966	2	442	70	17682	1.14364	1191;33	CLU;ACADL	0.527194	0.27803	0.816799
GO:0005829	cytosol	http://amigo.geneontology.org/amigo/term/GO:0005829	76	442	3051	17682	0.995782	5295;10891;316;394;6204;2948;2944;4983;79608;57447;6819;8850;4217;200558;825;1036;5590;5332;81617;367;11127;2053;7111;4915;5348;84144;85004;8165;6720;6284;2949;51555;5071;26960;122622;5592;7048;10276;1491;26249;51191;5063;8741;161823;5608;9108;8895;5563;1191;51382;8898;27143;4289;340351;1780;317649;1154;6135;5153;6767;60485;2634;10800;51339;1806;875;119391;2308;5588;27031;6168;445;586;5311;55014;…	PIK3R1;PPARGC1A;AOX1;ARHGAP5;RPS10;GSTM4;GSTM1;OPHN1;RIC3;NDRG2;SULT1C2;KAT2B;MAP3K5;APLF;CAPN3;CDO1;PRKCZ;PLCB4;CAB39L;AR;KIF3A;EPHX2;TMOD1;NTRK2;FXYD1;SYDE2;RERG;AKAP1;SREBF1;S100A13;GSTM5;PEX5L;PARK2;NBEA;ADSSL1;PRKG1;TGFBR2;NET1;CTH;KLHL3;HERC5;PAK3;TNFSF13;ADAL;MAP2K6;MTMR7;CPNE3;PRKAA2;CLU;ATP6V1D;MTMR2;PALD1;MKLN1;AGBL3;DYNC1I1;EIF4E3;CISH;RPL11;PDE1B;ST13;SAV1;GBP2;CYSLTR1;DACT1;DPYD;CBS;…	0.533343	0.272993	0.816799
GO:0071944	cell periphery	http://amigo.geneontology.org/amigo/term/GO:0071944	1	442	30	17682	1.33424	3875	KRT18	0.535144	0.271529	0.816799
GO:0032391	photoreceptor connecting cilium	http://amigo.geneontology.org/amigo/term/GO:0032391	1	442	30	17682	1.33424	8100	IFT88	0.535144	0.271529	0.816799
GO:0016235	aggresome	http://amigo.geneontology.org/amigo/term/GO:0016235	1	442	30	17682	1.33424	5071	PARK2	0.535144	0.271529	0.816799
GO:0005762	mitochondrial large ribosomal subunit	http://amigo.geneontology.org/amigo/term/GO:0005762	1	442	31	17682	1.29113	91574	C12orf65	0.5465	0.26241	0.829765
GO:0005874	microtubule	http://amigo.geneontology.org/amigo/term/GO:0005874	7	442	279	17682	1.00376	4135;83657;9576;1768;1780;27019;127602	MAP6;DYNLRB2;SPAG6;DNAH6;DYNC1I1;DNAI1;DNAH14	0.549481	0.260047	0.829945
GO:0001772	immunological synapse	http://amigo.geneontology.org/amigo/term/GO:0001772	1	442	32	17682	1.25071	5588	PRKCQ	0.557579	0.253693	0.831514
GO:0032040	small-subunit processome	http://amigo.geneontology.org/amigo/term/GO:0032040	1	442	32	17682	1.25071	2091	FBL	0.557579	0.253693	0.831514
GO:0005844	polysome	http://amigo.geneontology.org/amigo/term/GO:0005844	1	442	33	17682	1.21274	55124	PIWIL2	0.568389	0.245355	0.831514
GO:0005795	Golgi stack	http://amigo.geneontology.org/amigo/term/GO:0005795	1	442	33	17682	1.21274	55959	SULF2	0.568389	0.245355	0.831514
GO:0031252	cell leading edge	http://amigo.geneontology.org/amigo/term/GO:0031252	1	442	33	17682	1.21274	5590	PRKCZ	0.568389	0.245355	0.831514
GO:0016021	integral component of membrane	http://amigo.geneontology.org/amigo/term/GO:0016021	91	442	3685	17682	0.984763	206338;54798;10653;93010;441294;10350;79608;10826;1825;55733;55568;9955;93517;646962;94103;23461;83857;4882;51478;64755;55356;2823;340895;143903;81539;8165;6720;9481;554236;9331;7048;120406;55283;3815;4254;108;401427;79583;204219;8326;89894;150709;8748;203328;10349;389668;9671;11149;57211;390063;255231;441432;51754;51435;154214;51704;6442;144321;259292;259293;163702;201931;3290;30815;340307;2487;…	LVRN;DCHS2;SPINT2;B3GNT7;CTAGE15;ABCA9;RIC3;FAXDC2;DSC3;HHAT;GALNT10;HS3ST3A1;SDR42E1;HRCT1;ORMDL3;ABCA5;TMTC1;NPR2;HSD17B7;C16orf58;SLC22A15;GPM6A;MALRD1;LAYN;SLC38A1;AKAP1;SREBF1;SLC25A27;DPY19L2P1;B4GALT6;TGFBR2;NXPE2;MCOLN3;KIT;KITLG;ADCY2;OR2A7;TMEM231;CERS3;FZD9;TMEM116;ANKAR;ADAM20;SUSD3;ABCA10;XKR9;WSCD2;BVES;ADGRG6;OR51I1;MCOLN2;AQP7P3;TMEM8B;SCARA3;RNF217;GPRC5B;SGCA;GLIPR1L2;TAS2R46;TA…	0.570472	0.243766	0.831514
GO:0032580	Golgi cisterna membrane	http://amigo.geneontology.org/amigo/term/GO:0032580	2	442	76	17682	1.05299	9331;283796	B4GALT6;GOLGA8IP	0.570591	0.243675	0.831514
GO:0008180	COP9 signalosome	http://amigo.geneontology.org/amigo/term/GO:0008180	1	442	34	17682	1.177	7111	TMOD1	0.578934	0.237371	0.835278
GO:0005782	peroxisomal matrix	http://amigo.geneontology.org/amigo/term/GO:0005782	1	442	34	17682	1.177	23417	MLYCD	0.578934	0.237371	0.835278
GO:0045177	apical part of cell	http://amigo.geneontology.org/amigo/term/GO:0045177	2	442	78	17682	1.02587	9481;92840	SLC25A27;REEP6	0.584401	0.233289	0.838992
GO:0016592	mediator complex	http://amigo.geneontology.org/amigo/term/GO:0016592	1	442	35	17682	1.14331	9443	MED7	0.589223	0.22972	0.839544
GO:0000151	ubiquitin ligase complex	http://amigo.geneontology.org/amigo/term/GO:0000151	2	442	79	17682	1.01283	5071;9443	PARK2;MED7	0.591183	0.228278	0.839544
GO:0005576	extracellular region	http://amigo.geneontology.org/amigo/term/GO:0005576	35	442	1441	17682	0.96922	176;10653;2262;440163;5265;1825;727;55075;10371;6285;1116;140686;710;55540;5744;4254;1191;3075;770;347;280664;3700;441549;3818;60676;2263;5618;6649;79625;2878;1634;4233;56624;58496;9723	ACAN;SPINT2;GPC5;RNASE13;SERPINA1;DSC3;C5;UACA;SEMA3A;S100B;CHI3L1;WFDC3;SERPING1;IL17RB;PTHLH;KITLG;CLU;CFH;CA11;APOD;WFDC10B;ITIH4;CDNF;KLKB1;PAPPA2;FGFR2;PRLR;SOD3;NDNF;GPX3;DCN;MET;ASAH2;LY6G5B;SEMA3E	0.595374	0.22521	0.839544
GO:0005637	nuclear inner membrane	http://amigo.geneontology.org/amigo/term/GO:0005637	1	442	36	17682	1.11149	283417	DPY19L2	0.599261	0.222384	0.839544
GO:0072686	mitotic spindle	http://amigo.geneontology.org/amigo/term/GO:0072686	1	442	36	17682	1.11149	5311	PKD2	0.599261	0.222384	0.839544
GO:0033116	endoplasmic reticulum-Golgi intermediate compartment membrane	http://amigo.geneontology.org/amigo/term/GO:0033116	1	442	37	17682	1.08139	55014	STX17	0.609054	0.215344	0.847842
GO:0043204	perikaryon	http://amigo.geneontology.org/amigo/term/GO:0043204	2	442	82	17682	0.97561	79739;445	TTLL7;ASS1	0.611031	0.213937	0.847842
GO:0019898	extrinsic component of membrane	http://amigo.geneontology.org/amigo/term/GO:0019898	2	442	83	17682	0.963801	26960;1271	NBEA;CNTFR	0.617482	0.209376	0.85022
GO:0019005	SCF ubiquitin ligase complex	http://amigo.geneontology.org/amigo/term/GO:0019005	1	442	38	17682	1.05287	5071	PARK2	0.618608	0.208584	0.85022
GO:0008021	synaptic vesicle	http://amigo.geneontology.org/amigo/term/GO:0008021	2	442	85	17682	0.941016	8898;83992	MTMR2;CTTNBP2	0.630136	0.200565	0.859241
GO:0005741	mitochondrial outer membrane	http://amigo.geneontology.org/amigo/term/GO:0005741	3	442	130	17682	0.922656	8165;4653;445	AKAP1;MYOC;ASS1	0.633195	0.198463	0.859241
GO:0030315	T-tubule	http://amigo.geneontology.org/amigo/term/GO:0030315	1	442	40	17682	1.00011	825	CAPN3	0.637023	0.195845	0.859241
GO:0022627	cytosolic small ribosomal subunit	http://amigo.geneontology.org/amigo/term/GO:0022627	1	442	40	17682	1.00011	6204	RPS10	0.637023	0.195845	0.859241
GO:0012505	endomembrane system	http://amigo.geneontology.org/amigo/term/GO:0012505	2	442	87	17682	0.919279	26960;55014	NBEA;STX17	0.642463	0.192152	0.862209
GO:0005801	cis-Golgi network	http://amigo.geneontology.org/amigo/term/GO:0005801	1	442	41	17682	0.975665	5295	PIK3R1	0.645896	0.189838	0.862209
GO:0005802	trans-Golgi network	http://amigo.geneontology.org/amigo/term/GO:0005802	3	442	133	17682	0.90169	26960;6649;134829	NBEA;SOD3;CLVS2	0.648143	0.188329	0.862209
GO:0030669	clathrin-coated endocytic vesicle membrane	http://amigo.geneontology.org/amigo/term/GO:0030669	1	442	42	17682	0.952381	134829	CLVS2	0.654551	0.184056	0.866757
GO:0031410	cytoplasmic vesicle	http://amigo.geneontology.org/amigo/term/GO:0031410	3	442	139	17682	0.862474	8777;80319;4653	MPDZ;CXXC4;MYOC	0.676728	0.169586	0.884816
GO:0016605	PML body	http://amigo.geneontology.org/amigo/term/GO:0016605	2	442	93	17682	0.859677	10891;7181	PPARGC1A;NR2C1	0.677498	0.169092	0.884816
GO:0005876	spindle microtubule	http://amigo.geneontology.org/amigo/term/GO:0005876	1	442	45	17682	0.888738	11127	KIF3A	0.679272	0.167956	0.884816
GO:0016323	basolateral plasma membrane	http://amigo.geneontology.org/amigo/term/GO:0016323	4	442	185	17682	0.863729	481;1832;770;134	ATP1B1;DSP;CA11;ADORA1	0.680393	0.16724	0.884816
GO:0031201	SNARE complex	http://amigo.geneontology.org/amigo/term/GO:0031201	1	442	46	17682	0.869368	55014	STX17	0.687114	0.162971	0.889567
GO:0016363	nuclear matrix	http://amigo.geneontology.org/amigo/term/GO:0016363	2	442	96	17682	0.83267	5590;55791	PRKCZ;LRIF1	0.693942	0.158677	0.890727
GO:0045202	synapse	http://amigo.geneontology.org/amigo/term/GO:0045202	4	442	189	17682	0.845256	22849;27445;51299;51339	CPEB3;PCLO;NRN1;DACT1	0.69612	0.157316	0.890727
GO:0005902	microvillus	http://amigo.geneontology.org/amigo/term/GO:0005902	1	442	48	17682	0.83305	51181	DCXR	0.702228	0.153522	0.890727
GO:0030173	integral component of Golgi membrane	http://amigo.geneontology.org/amigo/term/GO:0030173	1	442	48	17682	0.83305	10610	ST6GALNAC2	0.702228	0.153522	0.890727
GO:0005882	intermediate filament	http://amigo.geneontology.org/amigo/term/GO:0005882	2	442	98	17682	0.815584	3875;1832	KRT18;DSP	0.704516	0.152109	0.890727
GO:0005881	cytoplasmic microtubule	http://amigo.geneontology.org/amigo/term/GO:0005881	1	442	49	17682	0.816003	51181	DCXR	0.70951	0.149042	0.890727
GO:0030136	clathrin-coated vesicle	http://amigo.geneontology.org/amigo/term/GO:0030136	1	442	49	17682	0.816003	134829	CLVS2	0.70951	0.149042	0.890727
GO:0032588	trans-Golgi network membrane	http://amigo.geneontology.org/amigo/term/GO:0032588	1	442	50	17682	0.799637	134829	CLVS2	0.716614	0.144715	0.891923
GO:0034707	chloride channel complex	http://amigo.geneontology.org/amigo/term/GO:0034707	1	442	50	17682	0.799637	5348	FXYD1	0.716614	0.144715	0.891923
GO:0030426	growth cone	http://amigo.geneontology.org/amigo/term/GO:0030426	2	442	101	17682	0.791224	57447;2059	NDRG2;EPS8	0.719806	0.142784	0.892068
GO:0005778	peroxisomal membrane	http://amigo.geneontology.org/amigo/term/GO:0005778	1	442	51	17682	0.783914	51555	PEX5L	0.723544	0.140535	0.892884
GO:0030670	phagocytic vesicle membrane	http://amigo.geneontology.org/amigo/term/GO:0030670	1	442	52	17682	0.768795	10333	TLR6	0.730306	0.136495	0.896879
GO:0031901	early endosome membrane	http://amigo.geneontology.org/amigo/term/GO:0031901	2	442	104	17682	0.768269	8898;134829	MTMR2;CLVS2	0.734425	0.134053	0.896879
GO:0001725	stress fiber	http://amigo.geneontology.org/amigo/term/GO:0001725	1	442	53	17682	0.754246	10529	NEBL	0.736902	0.13259	0.896879
GO:0005777	peroxisome	http://amigo.geneontology.org/amigo/term/GO:0005777	2	442	105	17682	0.760909	2053;23417	EPHX2;MLYCD	0.739152	0.131266	0.896879
GO:0000228	nuclear chromosome	http://amigo.geneontology.org/amigo/term/GO:0000228	1	442	54	17682	0.740237	10472	ZBTB18	0.743338	0.128814	0.8982
GO:0042734	presynaptic membrane	http://amigo.geneontology.org/amigo/term/GO:0042734	1	442	56	17682	0.713719	134	ADORA1	0.755741	0.121627	0.90564
GO:0030672	synaptic vesicle membrane	http://amigo.geneontology.org/amigo/term/GO:0030672	1	442	56	17682	0.713719	6833	ABCC8	0.755741	0.121627	0.90564
GO:0005840	ribosome	http://amigo.geneontology.org/amigo/term/GO:0005840	1	442	58	17682	0.68903	6204	RPS10	0.767547	0.114895	0.910674
GO:0005581	collagen trimer	http://amigo.geneontology.org/amigo/term/GO:0005581	1	442	58	17682	0.68903	51435	SCARA3	0.767547	0.114895	0.910674
GO:0005634	nucleus	http://amigo.geneontology.org/amigo/term/GO:0005634	118	442	4984	17682	0.927885	151126;148423;5295;10082;10891;8861;22869;56271;83852;604;4213;10140;55536;23368;4781;23469;8850;51734;200558;22849;825;10370;55070;84460;5332;26166;367;23142;168451;55075;3202;5935;7068;9576;85453;7700;10260;1832;6285;85004;81550;6720;55791;6284;11201;5071;84707;8418;9852;79366;49855;5000;9129;10276;7586;22909;1491;57798;140597;25976;2078;9771;8895;3209;23598;3131;1191;26191;8898;6097;6910;79612…	ZNF385B;C1orf52;PIK3R1;GPC6;PPARGC1A;LDB1;ZNF510;BEX4;SETDB2;BCL6;MEIS3P1;TOB1;CDCA7L;PPP1R13B;NFIB;PHF3;KAT2B;MSRB1;APLF;CPEB3;CAPN3;CITED2;DET1;ZMAT1;PLCB4;RGS22;AR;DCUN1D4;THAP5;UACA;HOXA5;RBM3;THRB;SPAG6;TSPYL5;ZNF141;DENND4A;DSP;S100B;RERG;TDRD3;SREBF1;LRIF1;S100A13;POLI;PARK2;BEX2;CMAHP;EPM2AIP1;HMGN5;SCAPER;ORC4;PRPF3;NET1;ZKSCAN1;FAN1;CTH;GATAD1;TCEAL2;TIPARP;ERG;RAPGEF5;CPNE3;HOXA13;PATZ…	0.769786	0.11363	0.910674
GO:0045111	intermediate filament cytoskeleton	http://amigo.geneontology.org/amigo/term/GO:0045111	1	442	60	17682	0.665986	3209	HOXA13	0.778783	0.108584	0.910674
GO:0005811	lipid particle	http://amigo.geneontology.org/amigo/term/GO:0005811	1	442	60	17682	0.665986	8165	AKAP1	0.778783	0.108584	0.910674
GO:0005793	endoplasmic reticulum-Golgi intermediate compartment	http://amigo.geneontology.org/amigo/term/GO:0005793	1	442	60	17682	0.665986	55014	STX17	0.778783	0.108584	0.910674
GO:0030659	cytoplasmic vesicle membrane	http://amigo.geneontology.org/amigo/term/GO:0030659	2	442	116	17682	0.688323	55890;51704	GPRC5C;GPRC5B	0.786554	0.104271	0.916067
GO:0005768	endosome	http://amigo.geneontology.org/amigo/term/GO:0005768	4	442	218	17682	0.731599	5590;5063;154;134829	PRKCZ;PAK3;ADRB2;CLVS2	0.79361	0.100393	0.918097
GO:0030175	filopodium	http://amigo.geneontology.org/amigo/term/GO:0030175	1	442	63	17682	0.634165	2823	GPM6A	0.794629	0.0998355	0.918097
GO:0005794	Golgi apparatus	http://amigo.geneontology.org/amigo/term/GO:0005794	17	442	812	17682	0.831034	4135;5265;57447;129049;10000;5071;5592;8614;5744;79925;1191;4653;201931;2263;81618;254887;25849	MAP6;SERPINA1;NDRG2;SGSM1;AKT3;PARK2;PRKG1;STC2;PTHLH;SPEF2;CLU;MYOC;TMEM192;FGFR2;ITM2C;ZDHHC23;PARM1	0.801942	0.095857	0.92287
GO:0005789	endoplasmic reticulum membrane	http://amigo.geneontology.org/amigo/term/GO:0005789	16	442	774	17682	0.820468	79608;55733;51478;6720;1577;258010;204219;51435;3290;285440;57834;4306;5311;55014;9487;92840	RIC3;HHAT;HSD17B7;SREBF1;CYP3A5;SVIP;CERS3;SCARA3;HSD11B1;CYP4V2;CYP4F11;NR3C2;PKD2;STX17;PIGL;REEP6	0.811079	0.0909366	0.929696
GO:0016023	cytoplasmic membrane-bounded vesicle	http://amigo.geneontology.org/amigo/term/GO:0016023	2	442	125	17682	0.638436	4653;2263	MYOC;FGFR2	0.819537	0.0864316	0.932517
GO:0005758	mitochondrial intermembrane space	http://amigo.geneontology.org/amigo/term/GO:0005758	1	442	69	17682	0.578823	4653	MYOC	0.823004	0.084598	0.932517
GO:0030054	cell junction	http://amigo.geneontology.org/amigo/term/GO:0030054	8	442	420	17682	0.757604	4983;2059;5590;27445;51299;51339;26037;56899	OPHN1;EPS8;PRKCZ;PCLO;NRN1;DACT1;SIPA1L1;ANKS1B	0.823187	0.0845013	0.932517
GO:0045121	membrane raft	http://amigo.geneontology.org/amigo/term/GO:0045121	3	442	181	17682	0.660756	5590;108;6442	PRKCZ;ADCY2;SGCA	0.829877	0.0809864	0.936437
GO:0005654	nucleoplasm	http://amigo.geneontology.org/amigo/term/GO:0005654	58	442	2604	17682	0.87458	148423;10891;83852;23368;4781;57447;8850;200558;367;168451;55075;10000;7068;51386;6720;11201;57697;64067;153769;79366;49855;5000;9129;22909;1491;5744;57798;8741;5608;3209;23598;5563;6674;6097;26054;388566;6910;64776;10579;10625;51339;10472;2263;22882;9572;10902;2308;7181;7029;4306;64061;3237;221264;9406;6626;23595;9443;23398	C1orf52;PPARGC1A;SETDB2;PPP1R13B;NFIB;NDRG2;KAT2B;APLF;AR;THAP5;UACA;AKT3;THRB;EIF3L;SREBF1;POLI;FANCM;NPAS3;SH3RF2;HMGN5;SCAPER;ORC4;PRPF3;FAN1;CTH;PTHLH;GATAD1;TNFSF13;MAP2K6;HOXA13;PATZ1;PRKAA2;SPAG1;RORC;SENP6;ZNF470;TBX5;C11orf1;TACC2;IVNS1ABP;DACT1;ZBTB18;FGFR2;ZHX2;NR1D1;BRD8;FOXO1;NR2C1;TFDP2;NR3C2;TSPYL2;HOXD11;AK9;ZRANB2;SNRPA;ORC3;MED7;PPWD1	0.843757	0.0737824	0.9423
GO:0005604	basement membrane	http://amigo.geneontology.org/amigo/term/GO:0005604	1	442	75	17682	0.532336	59277	NTN4	0.847466	0.0718775	0.9423
GO:0000777	condensed chromosome kinetochore	http://amigo.geneontology.org/amigo/term/GO:0000777	1	442	76	17682	0.525301	1780	DYNC1I1	0.851202	0.0699673	0.9423
GO:0005694	chromosome	http://amigo.geneontology.org/amigo/term/GO:0005694	1	442	77	17682	0.51845	83852	SETDB2	0.854846	0.0681119	0.9423
GO:0030176	integral component of endoplasmic reticulum membrane	http://amigo.geneontology.org/amigo/term/GO:0030176	1	442	78	17682	0.511774	6747	SSR3	0.858402	0.0663095	0.9423
GO:0032587	ruffle membrane	http://amigo.geneontology.org/amigo/term/GO:0032587	1	442	78	17682	0.511774	2059	EPS8	0.858402	0.0663095	0.9423
GO:0005635	nuclear envelope	http://amigo.geneontology.org/amigo/term/GO:0005635	2	442	139	17682	0.573676	5590;6720	PRKCZ;SREBF1	0.861824	0.0645814	0.9423
GO:0043234	protein complex	http://amigo.geneontology.org/amigo/term/GO:0043234	6	442	347	17682	0.687479	8861;825;367;6720;1191;6767	LDB1;CAPN3;AR;SREBF1;CLU;ST13	0.864117	0.0634274	0.9423
GO:0043005	neuron projection	http://amigo.geneontology.org/amigo/term/GO:0043005	4	442	247	17682	0.644631	79608;22849;2823;5071	RIC3;CPEB3;GPM6A;PARK2	0.864316	0.0633274	0.9423
GO:0000785	chromatin	http://amigo.geneontology.org/amigo/term/GO:0000785	1	442	83	17682	0.480808	79366	HMGN5	0.874916	0.0580336	0.950054
GO:0071013	catalytic step 2 spliceosome	http://amigo.geneontology.org/amigo/term/GO:0071013	1	442	84	17682	0.475057	23398	PPWD1	0.877981	0.056515	0.950054
GO:0030424	axon	http://amigo.geneontology.org/amigo/term/GO:0030424	3	442	207	17682	0.576904	10371;8898;154	SEMA3A;MTMR2;ADRB2	0.889602	0.0508042	0.950582
GO:0030027	lamellipodium	http://amigo.geneontology.org/amigo/term/GO:0030027	2	442	151	17682	0.527724	130271;5311	PLEKHH2;PKD2	0.89064	0.050298	0.950582
GO:0031965	nuclear membrane	http://amigo.geneontology.org/amigo/term/GO:0031965	3	442	208	17682	0.574098	204219;221264;9443	CERS3;AK9;MED7	0.891471	0.0498926	0.950582
GO:0000786	nucleosome	http://amigo.geneontology.org/amigo/term/GO:0000786	1	442	89	17682	0.448241	317772	HIST2H2AB	0.892216	0.0495298	0.950582
GO:0031902	late endosome membrane	http://amigo.geneontology.org/amigo/term/GO:0031902	1	442	90	17682	0.443235	23461	ABCA5	0.894858	0.0482459	0.950582
GO:0005886	plasma membrane	http://amigo.geneontology.org/amigo/term/GO:0005886	84	442	3788	17682	0.860624	6584;54798;5295;10082;2262;51678;55959;23368;1825;825;5590;481;347732;26166;10991;4882;51478;10000;2823;1832;5348;81539;10076;26960;5592;7048;10276;9077;55283;5063;3815;4254;108;258010;401427;8895;8326;8748;203328;10333;60495;11149;57211;390063;130271;255231;25945;3700;51299;51754;3818;10207;51704;1154;259292;259293;163702;201931;10800;30815;390067;482;2263;6833;5618;3778;22882;5588;56963;50619;1…	SLC22A5;DCHS2;PIK3R1;GPC6;GPC5;MPP6;SULF2;PPP1R13B;DSC3;CAPN3;PRKCZ;ATP1B1;CATSPER3;RGS22;SLC38A3;NPR2;HSD17B7;AKT3;GPM6A;DSP;FXYD1;SLC38A1;PTPRU;NBEA;PRKG1;TGFBR2;NET1;DIRAS3;MCOLN3;PAK3;KIT;KITLG;ADCY2;SVIP;OR2A7;CPNE3;FZD9;ADAM20;SUSD3;TLR6;HPSE2;BVES;ADGRG6;OR51I1;PLEKHH2;MCOLN2;PVRL3;ITIH4;NRN1;TMEM8B;KLKB1;INADL;GPRC5B;CISH;TAS2R46;TAS2R30;IFNLR1;TMEM192;CYSLTR1;ST6GALNAC6;OR52H1;ATP1B2;FGF…	0.901745	0.0449164	0.95069
GO:0045095	keratin filament	http://amigo.geneontology.org/amigo/term/GO:0045095	1	442	94	17682	0.424278	3875	KRT18	0.904794	0.0434501	0.95069
GO:0005814	centriole	http://amigo.geneontology.org/amigo/term/GO:0005814	1	442	94	17682	0.424278	8100	IFT88	0.904794	0.0434501	0.95069
GO:0055037	recycling endosome	http://amigo.geneontology.org/amigo/term/GO:0055037	1	442	97	17682	0.411085	1780	DYNC1I1	0.911627	0.040183	0.954411
GO:0005730	nucleolus	http://amigo.geneontology.org/amigo/term/GO:0005730	15	442	826	17682	0.716866	6204;55536;4781;3875;79366;5000;51704;6135;10579;875;64061;2091;221264;6626;8538	RPS10;CDCA7L;NFIB;KRT18;HMGN5;ORC4;GPRC5B;RPL11;TACC2;CBS;TSPYL2;FBL;AK9;SNRPA;BARX2	0.921038	0.0357223	0.960795
GO:0005887	integral component of plasma membrane	http://amigo.geneontology.org/amigo/term/GO:0005887	26	442	1355	17682	0.75309	6584;55890;10082;2262;7049;400746;10991;4915;5348;81539;10936;10076;8645;55540;10333;25945;3595;29121;10800;2263;154;134;5311;6337;4233;6574	SLC22A5;GPRC5C;GPC6;GPC5;TGFBR3;NCMAP;SLC38A3;NTRK2;FXYD1;SLC38A1;GPR75;PTPRU;KCNK5;IL17RB;TLR6;PVRL3;IL12RB2;CLEC2D;CYSLTR1;FGFR2;ADRB2;ADORA1;PKD2;SCNN1A;MET;SLC20A1	0.935612	0.0289043	0.970409
GO:0030529	ribonucleoprotein complex	http://amigo.geneontology.org/amigo/term/GO:0030529	1	442	111	17682	0.358951	2078	ERG	0.93758	0.0279916	0.970409
GO:0010008	endosome membrane	http://amigo.geneontology.org/amigo/term/GO:0010008	2	442	184	17682	0.432263	4915;25849	NTRK2;PARM1	0.943639	0.025194	0.970409
GO:0005788	endoplasmic reticulum lumen	http://amigo.geneontology.org/amigo/term/GO:0005788	2	442	184	17682	0.432263	23127;22901	COLGALT2;ARSG	0.943639	0.025194	0.970409
GO:0030496	midbody	http://amigo.geneontology.org/amigo/term/GO:0030496	1	442	124	17682	0.321081	80817	CEP44	0.954814	0.0200812	0.978431
GO:0043209	myelin sheath	http://amigo.geneontology.org/amigo/term/GO:0043209	1	442	143	17682	0.278119	481	ATP1B1	0.971833	0.0124082	0.991296
GO:0005813	centrosome	http://amigo.geneontology.org/amigo/term/GO:0005813	5	442	407	17682	0.485637	57447;11127;80817;51382;64061	NDRG2;KIF3A;CEP44;ATP6V1D;TSPYL2	0.974205	0.0113499	0.991296
GO:0016607	nuclear speck	http://amigo.geneontology.org/amigo/term/GO:0016607	1	442	184	17682	0.215641	9129	PRPF3	0.98986	0.00442626	0.999608
GO:0016020	membrane	http://amigo.geneontology.org/amigo/term/GO:0016020	33	442	1894	17682	0.67257	5295;51678;394;6204;1825;5590;481;84073;64755;51386;7111;85004;8165;27445;8418;55540;108;9108;51382;389668;79877;6135;60676;3290;29121;10800;2487;2263;50619;51181;2091;6574;10103	PIK3R1;MPP6;ARHGAP5;RPS10;DSC3;PRKCZ;ATP1B1;MYCBPAP;C16orf58;EIF3L;TMOD1;RERG;AKAP1;PCLO;CMAHP;IL17RB;ADCY2;MTMR7;ATP6V1D;XKR9;DCAKD;RPL11;PAPPA2;HSD11B1;CLEC2D;CYSLTR1;FRZB;FGFR2;DEF6;DCXR;FBL;SLC20A1;TSPAN1	0.990854	0.00399048	0.999608
GO:0005769	early endosome	http://amigo.geneontology.org/amigo/term/GO:0005769	1	442	203	17682	0.195246	25849	PARM1	0.993689	0.00274939	0.999608
GO:0005925	focal adhesion	http://amigo.geneontology.org/amigo/term/GO:0005925	3	442	387	17682	0.305398	6204;143903;6168	RPS10;LAYN;RPL37A	0.996426	0.00155493	0.999608
GO:0005743	mitochondrial inner membrane	http://amigo.geneontology.org/amigo/term/GO:0005743	2	442	410	17682	0.191486	9481;4653	SLC25A27;MYOC	0.999608	0.000170207	0.999608
