# Supplementary material for: lnc-SAMD14-4 can regulate expression of the COL1A1 and COL1A2 in human chondrocytes
Source: PeerJ. 2019 Sep 2;7:e7491. doi: 10.7717/peerj.7491 (PMC6727836; doi:10.7717/peerj.7491)
Supplement: Table S11 [file peerj-07-7491-s017.xlsx]

## Sheet: Supplementary Table 11
Term_ID	Term_description	Term_url	ListHit	ListTotal	PopHit	PopTotal	FoldEnrichment	Genes	GeneSymbols	P_value	"-log10(pvalue)"	FDR_bh
path:hsa00982	Drug metabolism - cytochrome P450	http://www.kegg.jp/kegg-bin/show_pathway?hsa00982/2949%09red/316%09red/2948%09red/2944%09red/119391%09red/2953%09red/1577%09red	7	171	68	6948	4.31851	2949;316;2948;2944;119391;2953;1577	GSTM5;AOX1;GSTM4;GSTM1;GSTO2;GSTT2;CYP3A5	0.00205031	2.68818	0.117733
path:hsa00480	Glutathione metabolism	http://www.kegg.jp/kegg-bin/show_pathway?hsa00480/2949%09red/2948%09red/2944%09red/119391%09red/2953%09red/2878%09red	6	171	51	6948	4.91765	2949;2948;2944;119391;2953;2878	GSTM5;GSTM4;GSTM1;GSTO2;GSTT2;GPX3	0.00231487	2.63547	0.117733
path:hsa00980	Metabolism of xenobiotics by cytochrome P450	http://www.kegg.jp/kegg-bin/show_pathway?hsa00980/2949%09red/2948%09red/2944%09red/119391%09red/2953%09red/1577%09red/3290%09red	7	171	74	6948	3.9649	2949;2948;2944;119391;2953;1577;3290	GSTM5;GSTM4;GSTM1;GSTO2;GSTT2;CYP3A5;HSD11B1	0.00318547	2.49683	0.117733
path:hsa04919	Thyroid hormone signaling pathway	http://www.kegg.jp/kegg-bin/show_pathway?hsa04919/482%09red/5295%09red/481%09red/7068%09red/8850%09red/2308%09red/10231%09red/5332%09red/10000%09red	9	171	119	6948	3.18814	482;5295;481;7068;8850;2308;10231;5332;10000	ATP1B2;PIK3R1;ATP1B1;THRB;KAT2B;FOXO1;RCAN2;PLCB4;AKT3	0.00355896	2.44868	0.117733
path:hsa04022	cGMP-PKG signaling pathway	http://www.kegg.jp/kegg-bin/show_pathway?hsa04022/482%09red/5295%09red/481%09red/154%09red/3778%09red/134%09red/108%09red/5592%09red/5332%09red/4882%09red/10000%09red	11	171	167	6948	2.79158	482;5295;481;154;3778;134;108;5592;5332;4882;10000	ATP1B2;PIK3R1;ATP1B1;ADRB2;KCNMA1;ADORA1;ADCY2;PRKG1;PLCB4;NPR2;AKT3	0.00361119	2.44235	0.117733
path:hsa04960	Aldosterone-regulated sodium reabsorption	http://www.kegg.jp/kegg-bin/show_pathway?hsa04960/482%09red/5295%09red/481%09red/6337%09red/4306%09red	5	171	39	6948	5.33596	482;5295;481;6337;4306	ATP1B2;PIK3R1;ATP1B1;SCNN1A;NR3C2	0.00383855	2.41583	0.117733
path:hsa04923	Regulation of lipolysis in adipocytes	http://www.kegg.jp/kegg-bin/show_pathway?hsa04923/5295%09red/154%09red/134%09red/108%09red/5592%09red/10000%09red	6	171	57	6948	4.39617	5295;154;134;108;5592;10000	PIK3R1;ADRB2;ADORA1;ADCY2;PRKG1;AKT3	0.00385109	2.41442	0.117733
path:hsa05204	Chemical carcinogenesis	http://www.kegg.jp/kegg-bin/show_pathway?hsa05204/2949%09red/2948%09red/2944%09red/119391%09red/2953%09red/1577%09red/3290%09red	7	171	81	6948	3.61856	2949;2948;2944;119391;2953;1577;3290	GSTM5;GSTM4;GSTM1;GSTO2;GSTT2;CYP3A5;HSD11B1	0.00505689	2.29612	0.135272
path:hsa04911	Insulin secretion	http://www.kegg.jp/kegg-bin/show_pathway?hsa04911/482%09red/481%09red/6833%09red/3778%09red/108%09red/5332%09red/27445%09red	7	171	86	6948	3.4057	482;481;6833;3778;108;5332;27445	ATP1B2;ATP1B1;ABCC8;KCNMA1;ADCY2;PLCB4;PCLO	0.00683057	2.16554	0.155558
path:hsa04015	Rap1 signaling pathway	http://www.kegg.jp/kegg-bin/show_pathway?hsa04015/5295%09red/2263%09red/9771%09red/3815%09red/4233%09red/108%09red/5590%09red/4254%09red/5332%09red/5608%09red/26037%09red/10000%09red	12	171	211	6948	2.40973	5295;2263;9771;3815;4233;108;5590;4254;5332;5608;26037;10000	PIK3R1;FGFR2;RAPGEF5;KIT;MET;ADCY2;PRKCZ;KITLG;PLCB4;MAP2K6;SIPA1L1;AKT3	0.00726905	2.13852	0.155558
path:hsa04970	Salivary secretion	http://www.kegg.jp/kegg-bin/show_pathway?hsa04970/482%09red/481%09red/154%09red/3778%09red/108%09red/5592%09red/5332%09red	7	171	90	6948	3.25244	482;481;154;3778;108;5592;5332	ATP1B2;ATP1B1;ADRB2;KCNMA1;ADCY2;PRKG1;PLCB4	0.00855353	2.06785	0.166405
path:hsa04918	Thyroid hormone synthesis	http://www.kegg.jp/kegg-bin/show_pathway?hsa04918/482%09red/481%09red/5172%09red/2878%09red/108%09red/5332%09red	6	171	72	6948	3.47273	482;481;5172;2878;108;5332	ATP1B2;ATP1B1;SLC26A4;GPX3;ADCY2;PLCB4	0.0108479	1.96466	0.192558
path:hsa04071	Sphingolipid signaling pathway	http://www.kegg.jp/kegg-bin/show_pathway?hsa04071/5295%09red/56624%09red/4217%09red/134%09red/5590%09red/5332%09red/10000%09red/204219%09red	8	171	120	6948	2.79264	5295;56624;4217;134;5590;5332;10000;204219	PIK3R1;ASAH2;MAP3K5;ADORA1;PRKCZ;PLCB4;AKT3;CERS3	0.0116975	1.93191	0.192558
path:hsa04152	AMPK signaling pathway	http://www.kegg.jp/kegg-bin/show_pathway?hsa04152/5563%09red/5295%09red/10891%09red/6720%09red/81617%09red/2308%09red/10000%09red/23417%09red	8	171	124	6948	2.70097	5563;5295;10891;6720;81617;2308;10000;23417	PRKAA2;PIK3R1;PPARGC1A;SREBF1;CAB39L;FOXO1;AKT3;MLYCD	0.013904	1.85686	0.208338
path:hsa00750	Vitamin B6 metabolism	http://www.kegg.jp/kegg-bin/show_pathway?hsa00750/316%09red/493911%09red	2	171	6	6948	13.6923	316;493911	AOX1;PHOSPHO2	0.0146031	1.83555	0.208338
path:hsa04964	Proximal tubule bicarbonate reclamation	http://www.kegg.jp/kegg-bin/show_pathway?hsa04964/482%09red/481%09red/10991%09red	3	171	23	6948	5.37655	482;481;10991	ATP1B2;ATP1B1;SLC38A3	0.0236055	1.62699	0.300055
path:hsa04910	Insulin signaling pathway	http://www.kegg.jp/kegg-bin/show_pathway?hsa04910/5563%09red/5295%09red/10891%09red/6720%09red/2308%09red/5590%09red/90673%09red/10000%09red	8	171	140	6948	2.38668	5563;5295;10891;6720;2308;5590;90673;10000	PRKAA2;PIK3R1;PPARGC1A;SREBF1;FOXO1;PRKCZ;PPP1R3E;AKT3	0.0258215	1.58802	0.300055
path:hsa04924	Renin secretion	http://www.kegg.jp/kegg-bin/show_pathway?hsa04924/154%09red/3778%09red/134%09red/5153%09red/5332%09red	5	171	65	6948	3.18953	154;3778;134;5153;5332	ADRB2;KCNMA1;ADORA1;PDE1B;PLCB4	0.0260291	1.58454	0.300055
path:hsa02010	ABC transporters	http://www.kegg.jp/kegg-bin/show_pathway?hsa02010/6833%09red/10349%09red/10350%09red/23461%09red	4	171	44	6948	3.7583	6833;10349;10350;23461	ABCC8;ABCA10;ABCA9;ABCA5	0.0275407	1.56002	0.300055
path:hsa05230	Central carbon metabolism in cancer	http://www.kegg.jp/kegg-bin/show_pathway?hsa05230/5295%09red/2263%09red/3815%09red/4233%09red/10000%09red	5	171	67	6948	3.09342	5295;2263;3815;4233;10000	PIK3R1;FGFR2;KIT;MET;AKT3	0.028972	1.53802	0.300055
path:hsa04973	Carbohydrate digestion and absorption	http://www.kegg.jp/kegg-bin/show_pathway?hsa04973/482%09red/5295%09red/481%09red/10000%09red	4	171	45	6948	3.67425	482;5295;481;10000	ATP1B2;PIK3R1;ATP1B1;AKT3	0.0294446	1.53099	0.300055
path:hsa04610	Complement and coagulation cascades	http://www.kegg.jp/kegg-bin/show_pathway?hsa04610/3075%09red/3818%09red/710%09red/727%09red/5265%09red	5	171	69	6948	3.00288	3075;3818;710;727;5265	CFH;KLKB1;SERPING1;C5;SERPINA1	0.0321178	1.49325	0.311524
path:hsa00280	Valine, leucine and isoleucine degradation	http://www.kegg.jp/kegg-bin/show_pathway?hsa00280/316%09red/586%09red/549%09red/1629%09red	4	171	47	6948	3.51688	316;586;549;1629	AOX1;BCAT1;AUH;DBT	0.0334815	1.47519	0.311524
path:hsa04978	Mineral absorption	http://www.kegg.jp/kegg-bin/show_pathway?hsa04978/482%09red/481%09red/4501%09red/79901%09red	4	171	51	6948	3.23917	482;481;4501;79901	ATP1B2;ATP1B1;MT1X;CYBRD1	0.0424795	1.37182	0.368236
path:hsa01130	Biosynthesis of antibiotics	http://www.kegg.jp/kegg-bin/show_pathway?hsa01130/414328%09red/10157%09red/445%09red/10826%09red/586%09red/221264%09red/875%09red/1491%09red/1629%09red/51478%09red	10	171	214	6948	1.95449	414328;10157;445;10826;586;221264;875;1491;1629;51478	IDNK;AASS;ASS1;FAXDC2;BCAT1;AK9;CBS;CTH;DBT;HSD17B7	0.0430183	1.36635	0.368236
path:hsa04922	Glucagon signaling pathway	http://www.kegg.jp/kegg-bin/show_pathway?hsa04922/5563%09red/10891%09red/2308%09red/108%09red/5332%09red/10000%09red	6	171	102	6948	2.44064	5563;10891;2308;108;5332;10000	PRKAA2;PPARGC1A;FOXO1;ADCY2;PLCB4;AKT3	0.0451574	1.34527	0.37168
path:hsa04710	Circadian rhythm	http://www.kegg.jp/kegg-bin/show_pathway?hsa04710/5563%09red/6097%09red/9572%09red	3	171	31	6948	3.98445	5563;6097;9572	PRKAA2;RORC;NR1D1	0.0473027	1.32511	0.374918
path:hsa00250	Alanine, aspartate and glutamate metabolism	http://www.kegg.jp/kegg-bin/show_pathway?hsa00250/445%09red/122622%09red/7915%09red	3	171	35	6948	3.52704	445;122622;7915	ASS1;ADSSL1;ALDH5A1	0.0622576	1.20581	0.475826
path:hsa04150	mTOR signaling pathway	http://www.kegg.jp/kegg-bin/show_pathway?hsa04150/5563%09red/5295%09red/81617%09red/10000%09red	4	171	60	6948	2.7497	5563;5295;81617;10000	PRKAA2;PIK3R1;CAB39L;AKT3	0.0672242	1.17247	0.495235
path:hsa00270	Cysteine and methionine metabolism	http://www.kegg.jp/kegg-bin/show_pathway?hsa00270/1036%09red/875%09red/1491%09red	3	171	38	6948	3.24718	1036;875;1491	CDO1;CBS;CTH	0.0747375	1.12646	0.495235
path:hsa05215	Prostate cancer	http://www.kegg.jp/kegg-bin/show_pathway?hsa05215/5295%09red/2263%09red/2308%09red/367%09red/10000%09red	5	171	89	6948	2.32131	5295;2263;2308;367;10000	PIK3R1;FGFR2;FOXO1;AR;AKT3	0.0751869	1.12386	0.495235
path:hsa01100	Metabolic pathways	http://www.kegg.jp/kegg-bin/show_pathway?hsa01100/9487%09red/414328%09red/5446%09red/51181%09red/1806%09red/56624%09red/81888%09red/316%09red/60495%09red/10157%09red/51382%09red/9331%09red/445%09red/122622%09red/8898%09red/56898%09red/10826%09red/55568%09red/30815%09red/586%09red/1036%09red/549%09red/493911%09red/1577%09red/117248%09red/221264%09red/33%09red/5332%09red/875%09red/1491%09red/3290%0…	38	171	1228	6948	1.33085	9487;414328;5446;51181;1806;56624;81888;316;60495;10157;51382;9331;445;122622;8898;56898;10826;55568;30815;586;1036;549;493911;1577;117248;221264;33;5332;875;1491;3290;1629;9108;7915;51478;2053;204219;23417	PIGL;IDNK;PON3;DCXR;DPYD;ASAH2;HYI;AOX1;HPSE2;AASS;ATP6V1D;B4GALT6;ASS1;ADSSL1;MTMR2;BDH2;FAXDC2;GALNT10;ST6GALNAC6;BCAT1;CDO1;AUH;PHOSPHO2;CYP3A5;GALNT15;AK9;ACADL;PLCB4;CBS;CTH;HSD11B1;DBT;MTMR7;ALDH5A1;HSD17B7;EPHX2;CERS3;MLYCD	0.0783293	1.10608	0.495235
path:hsa04261	Adrenergic signaling in cardiomyocytes	http://www.kegg.jp/kegg-bin/show_pathway?hsa04261/482%09red/5295%09red/481%09red/154%09red/108%09red/5332%09red/10000%09red	7	171	149	6948	1.94766	482;5295;481;154;108;5332;10000	ATP1B2;PIK3R1;ATP1B1;ADRB2;ADCY2;PLCB4;AKT3	0.0812741	1.09005	0.495235
path:hsa00770	Pantothenate and CoA biosynthesis	http://www.kegg.jp/kegg-bin/show_pathway?hsa00770/1806%09red/586%09red	2	171	18	6948	4.55621	1806;586	DPYD;BCAT1	0.0821782	1.08524	0.495235
path:hsa00260	Glycine, serine and threonine metabolism	http://www.kegg.jp/kegg-bin/show_pathway?hsa00260/27232%09red/875%09red/1491%09red	3	171	40	6948	3.08393	27232;875;1491	GNMT;CBS;CTH	0.0836243	1.07767	0.495235
path:hsa04270	Vascular smooth muscle contraction	http://www.kegg.jp/kegg-bin/show_pathway?hsa04270/3778%09red/5588%09red/108%09red/5592%09red/5332%09red/4882%09red	6	171	121	6948	2.05169	3778;5588;108;5592;5332;4882	KCNMA1;PRKCQ;ADCY2;PRKG1;PLCB4;NPR2	0.0847912	1.07165	0.495235
path:hsa05211	Renal cell carcinoma	http://www.kegg.jp/kegg-bin/show_pathway?hsa05211/5295%09red/4233%09red/5063%09red/10000%09red	4	171	66	6948	2.49755	5295;4233;5063;10000	PIK3R1;MET;PAK3;AKT3	0.0870794	1.06008	0.495235
path:hsa04972	Pancreatic secretion	http://www.kegg.jp/kegg-bin/show_pathway?hsa04972/482%09red/481%09red/3778%09red/108%09red/5332%09red	5	171	96	6948	2.14985	482;481;3778;108;5332	ATP1B2;ATP1B1;KCNMA1;ADCY2;PLCB4	0.0952607	1.02109	0.495235
path:hsa00100	Steroid biosynthesis	http://www.kegg.jp/kegg-bin/show_pathway?hsa00100/10826%09red/51478%09red	2	171	20	6948	4.09941	10826;51478	FAXDC2;HSD17B7	0.0968865	1.01374	0.495235
path:hsa04630	Jak-STAT signaling pathway	http://www.kegg.jp/kegg-bin/show_pathway?hsa04630/5295%09red/5618%09red/1154%09red/3595%09red/163702%09red/1271%09red/10000%09red	7	171	156	6948	1.85835	5295;5618;1154;3595;163702;1271;10000	PIK3R1;PRLR;CISH;IL12RB2;IFNLR1;CNTFR;AKT3	0.0970781	1.01288	0.495235
path:hsa04360	Axon guidance	http://www.kegg.jp/kegg-bin/show_pathway?hsa04360/10371%09red/4233%09red/59277%09red/5063%09red/8633%09red/9723%09red	6	171	127	6948	1.95304	10371;4233;59277;5063;8633;9723	SEMA3A;MET;NTN4;PAK3;UNC5C;SEMA3E	0.100347	0.998495	0.495235
path:hsa04920	Adipocytokine signaling pathway	http://www.kegg.jp/kegg-bin/show_pathway?hsa04920/5563%09red/10891%09red/5588%09red/10000%09red	4	171	70	6948	2.35346	5563;10891;5588;10000	PRKAA2;PPARGC1A;PRKCQ;AKT3	0.101723	0.992581	0.495235
path:hsa04750	Inflammatory mediator regulation of TRP channels	http://www.kegg.jp/kegg-bin/show_pathway?hsa04750/5295%09red/5588%09red/108%09red/5332%09red/5608%09red	5	171	99	6948	2.08379	5295;5588;108;5332;5608	PIK3R1;PRKCQ;ADCY2;PLCB4;MAP2K6	0.104624	0.980369	0.495235
path:hsa04917	Prolactin signaling pathway	http://www.kegg.jp/kegg-bin/show_pathway?hsa04917/5295%09red/5618%09red/1154%09red/10000%09red	4	171	72	6948	2.28743	5295;5618;1154;10000	PIK3R1;PRLR;CISH;AKT3	0.109445	0.960804	0.495235
path:hsa04916	Melanogenesis	http://www.kegg.jp/kegg-bin/show_pathway?hsa04916/3815%09red/108%09red/4254%09red/5332%09red/8326%09red	5	171	101	6948	2.04193	3815;108;4254;5332;8326	KIT;ADCY2;KITLG;PLCB4;FZD9	0.111111	0.954244	0.495235
path:hsa04611	Platelet activation	http://www.kegg.jp/kegg-bin/show_pathway?hsa04611/5295%09red/108%09red/5590%09red/5592%09red/5332%09red/10000%09red	6	171	131	6948	1.8923	5295;108;5590;5592;5332;10000	PIK3R1;ADCY2;PRKCZ;PRKG1;PLCB4;AKT3	0.111502	0.952717	0.495235
path:hsa01230	Biosynthesis of amino acids	http://www.kegg.jp/kegg-bin/show_pathway?hsa01230/445%09red/586%09red/875%09red/1491%09red	4	171	74	6948	2.22496	445;586;875;1491	ASS1;BCAT1;CBS;CTH	0.117422	0.930249	0.495235
path:hsa00600	Sphingolipid metabolism	http://www.kegg.jp/kegg-bin/show_pathway?hsa00600/56624%09red/9331%09red/204219%09red	3	171	47	6948	2.62196	56624;9331;204219	ASAH2;B4GALT6;CERS3	0.117968	0.928236	0.495235
path:hsa04068	FoxO signaling pathway	http://www.kegg.jp/kegg-bin/show_pathway?hsa04068/5563%09red/5295%09red/604%09red/7048%09red/2308%09red/10000%09red	6	171	134	6948	1.84912	5563;5295;604;7048;2308;10000	PRKAA2;PIK3R1;BCL6;TGFBR2;FOXO1;AKT3	0.120268	0.919849	0.495235
path:hsa05142	Chagas disease (American trypanosomiasis)	http://www.kegg.jp/kegg-bin/show_pathway?hsa05142/5295%09red/10333%09red/7048%09red/5332%09red/10000%09red	5	171	104	6948	1.98216	5295;10333;7048;5332;10000	PIK3R1;TLR6;TGFBR2;PLCB4;AKT3	0.121198	0.916505	0.495235
path:hsa04971	Gastric acid secretion	http://www.kegg.jp/kegg-bin/show_pathway?hsa04971/482%09red/481%09red/108%09red/5332%09red	4	171	75	6948	2.19497	482;481;108;5332	ATP1B2;ATP1B1;ADCY2;PLCB4	0.121504	0.915409	0.495235
path:hsa04930	Type II diabetes mellitus	http://www.kegg.jp/kegg-bin/show_pathway?hsa04930/5295%09red/6833%09red/5590%09red	3	171	48	6948	2.56696	5295;6833;5590	PIK3R1;ABCC8;PRKCZ	0.123248	0.909219	0.495235
path:hsa04961	Endocrine and other factor-regulated calcium reabsorption	http://www.kegg.jp/kegg-bin/show_pathway?hsa04961/482%09red/481%09red/5332%09red	3	171	48	6948	2.56696	482;481;5332	ATP1B2;ATP1B1;PLCB4	0.123248	0.909219	0.495235
path:hsa04060	Cytokine-cytokine receptor interaction	http://www.kegg.jp/kegg-bin/show_pathway?hsa04060/5618%09red/3815%09red/4233%09red/7048%09red/55540%09red/3595%09red/4254%09red/163702%09red/8741%09red/1271%09red	10	171	265	6948	1.56639	5618;3815;4233;7048;55540;3595;4254;163702;8741;1271	PRLR;KIT;MET;TGFBR2;IL17RB;IL12RB2;KITLG;IFNLR1;TNFSF13;CNTFR	0.124987	0.903136	0.495235
path:hsa04024	cAMP signaling pathway	http://www.kegg.jp/kegg-bin/show_pathway?hsa04024/482%09red/5295%09red/481%09red/154%09red/5348%09red/134%09red/108%09red/10000%09red	8	171	200	6948	1.65595	482;5295;481;154;5348;134;108;10000	ATP1B2;PIK3R1;ATP1B1;ADRB2;FXYD1;ADORA1;ADCY2;AKT3	0.12728	0.89524	0.495235
path:hsa00563	Glycosylphosphatidylinositol(GPI)-anchor biosynthesis	http://www.kegg.jp/kegg-bin/show_pathway?hsa00563/9487%09red/2822%09red	2	171	25	6948	3.27716	9487;2822	PIGL;GPLD1	0.136405	0.865171	0.521261
path:hsa05014	Amyotrophic lateral sclerosis (ALS)	http://www.kegg.jp/kegg-bin/show_pathway?hsa05014/4217%09red/100506742%09red/5608%09red	3	171	51	6948	2.41492	4217;100506742;5608	MAP3K5;CASP12;MAP2K6	0.139587	0.855154	0.524065
path:hsa00310	Lysine degradation	http://www.kegg.jp/kegg-bin/show_pathway?hsa00310/83852%09red/10157%09red/23127%09red	3	171	52	6948	2.36813	83852;10157;23127	SETDB2;AASS;COLGALT2	0.14519	0.838064	0.528347
path:hsa03460	Fanconi anemia pathway	http://www.kegg.jp/kegg-bin/show_pathway?hsa03460/57697%09red/22909%09red/11201%09red	3	171	53	6948	2.32311	57697;22909;11201	FANCM;FAN1;POLI	0.150865	0.821411	0.528347
path:hsa04742	Taste transduction	http://www.kegg.jp/kegg-bin/show_pathway?hsa04742/6337%09red/259292%09red/259293%09red	3	171	53	6948	2.32311	6337;259292;259293	SCNN1A;TAS2R46;TAS2R30	0.150865	0.821411	0.528347
path:hsa00650	Butanoate metabolism	http://www.kegg.jp/kegg-bin/show_pathway?hsa00650/56898%09red/7915%09red	2	171	27	6948	3.03353	56898;7915	BDH2;ALDH5A1	0.153072	0.815103	0.528347
path:hsa04320	Dorso-ventral axis formation	http://www.kegg.jp/kegg-bin/show_pathway?hsa04320/55124%09red/22849%09red	2	171	27	6948	3.03353	55124;22849	PIWIL2;CPEB3	0.153072	0.815103	0.528347
path:hsa05221	Acute myeloid leukemia	http://www.kegg.jp/kegg-bin/show_pathway?hsa05221/5295%09red/3815%09red/10000%09red	3	171	57	6948	2.15883	5295;3815;10000	PIK3R1;KIT;AKT3	0.17424	0.758852	0.591863
path:hsa04914	Progesterone-mediated oocyte maturation	http://www.kegg.jp/kegg-bin/show_pathway?hsa04914/5295%09red/22849%09red/108%09red/10000%09red	4	171	88	6948	1.86717	5295;22849;108;10000	PIK3R1;CPEB3;ADCY2;AKT3	0.179616	0.745655	0.593397
path:hsa00140	Steroid hormone biosynthesis	http://www.kegg.jp/kegg-bin/show_pathway?hsa00140/1577%09red/3290%09red/51478%09red	3	171	58	6948	2.12131	1577;3290;51478	CYP3A5;HSD11B1;HSD17B7	0.180238	0.744155	0.593397
path:hsa00410	beta-Alanine metabolism	http://www.kegg.jp/kegg-bin/show_pathway?hsa00410/1806%09red/23417%09red	2	171	31	6948	2.64058	1806;23417	DPYD;MLYCD	0.187447	0.727122	0.598711
path:hsa00512	Mucin type O-Glycan biosynthesis	http://www.kegg.jp/kegg-bin/show_pathway?hsa00512/55568%09red/117248%09red	2	171	31	6948	2.64058	55568;117248	GALNT10;GALNT15	0.187447	0.727122	0.598711
path:hsa04014	Ras signaling pathway	http://www.kegg.jp/kegg-bin/show_pathway?hsa04014/5295%09red/2263%09red/9771%09red/3815%09red/4233%09red/5063%09red/4254%09red/10000%09red	8	171	227	6948	1.45315	5295;2263;9771;3815;4233;5063;4254;10000	PIK3R1;FGFR2;RAPGEF5;KIT;MET;PAK3;KITLG;AKT3	0.203585	0.691253	0.63504
path:hsa05210	Colorectal cancer	http://www.kegg.jp/kegg-bin/show_pathway?hsa05210/5295%09red/7048%09red/10000%09red	3	171	62	6948	1.98329	5295;7048;10000	PIK3R1;TGFBR2;AKT3	0.204756	0.688764	0.63504
path:hsa04070	Phosphatidylinositol signaling system	http://www.kegg.jp/kegg-bin/show_pathway?hsa04070/5295%09red/8898%09red/5332%09red/9108%09red	4	171	98	6948	1.6742	5295;8898;5332;9108	PIK3R1;MTMR2;PLCB4;MTMR7	0.229479	0.639256	0.688362
path:hsa05212	Pancreatic cancer	http://www.kegg.jp/kegg-bin/show_pathway?hsa05212/5295%09red/7048%09red/10000%09red	3	171	66	6948	1.86201	5295;7048;10000	PIK3R1;TGFBR2;AKT3	0.229987	0.638297	0.688362
path:hsa05020	Prion diseases	http://www.kegg.jp/kegg-bin/show_pathway?hsa05020/100506742%09red/727%09red	2	171	36	6948	2.27219	100506742;727	CASP12;C5	0.231671	0.635128	0.688362
path:hsa00072	Synthesis and degradation of ketone bodies	http://www.kegg.jp/kegg-bin/show_pathway?hsa00072/56898%09red	1	171	10	6948	4.08118	56898	BDH2	0.234815	0.629274	0.688362
path:hsa04915	Estrogen signaling pathway	http://www.kegg.jp/kegg-bin/show_pathway?hsa04915/5295%09red/108%09red/5332%09red/10000%09red	4	171	100	6948	1.64024	5295;108;5332;10000	PIK3R1;ADCY2;PLCB4;AKT3	0.239853	0.620054	0.692906
path:hsa05205	Proteoglycans in cancer	http://www.kegg.jp/kegg-bin/show_pathway?hsa05205/5295%09red/60495%09red/4233%09red/8326%09red/3236%09red/1634%09red/10000%09red	7	171	204	6948	1.41105	5295;60495;4233;8326;3236;1634;10000	PIK3R1;HPSE2;MET;FZD9;HOXD10;DCN;AKT3	0.243996	0.612617	0.692906
path:hsa00430	Taurine and hypotaurine metabolism	http://www.kegg.jp/kegg-bin/show_pathway?hsa00430/1036%09red	1	171	11	6948	3.70963	1036	CDO1	0.253224	0.596496	0.692906
path:hsa04664	Fc epsilon RI signaling pathway	http://www.kegg.jp/kegg-bin/show_pathway?hsa04664/5295%09red/5608%09red/10000%09red	3	171	70	6948	1.75459	5295;5608;10000	PIK3R1;MAP2K6;AKT3	0.255759	0.592168	0.692906
path:hsa04530	Tight junction	http://www.kegg.jp/kegg-bin/show_pathway?hsa04530/5588%09red/10207%09red/8777%09red/5590%09red/10000%09red	5	171	138	6948	1.48638	5588;10207;8777;5590;10000	PRKCQ;INADL;MPDZ;PRKCZ;AKT3	0.259879	0.585228	0.692906
path:hsa04660	T cell receptor signaling pathway	http://www.kegg.jp/kegg-bin/show_pathway?hsa04660/5295%09red/5588%09red/5063%09red/10000%09red	4	171	104	6948	1.57623	5295;5588;5063;10000	PIK3R1;PRKCQ;PAK3;AKT3	0.260914	0.583502	0.692906
path:hsa00562	Inositol phosphate metabolism	http://www.kegg.jp/kegg-bin/show_pathway?hsa00562/8898%09red/5332%09red/9108%09red	3	171	71	6948	1.72963	8898;5332;9108	MTMR2;PLCB4;MTMR7	0.262268	0.581255	0.692906
path:hsa05218	Melanoma	http://www.kegg.jp/kegg-bin/show_pathway?hsa05218/5295%09red/4233%09red/10000%09red	3	171	71	6948	1.72963	5295;4233;10000	PIK3R1;MET;AKT3	0.262268	0.581255	0.692906
path:hsa04976	Bile secretion	http://www.kegg.jp/kegg-bin/show_pathway?hsa04976/482%09red/481%09red/108%09red	3	171	72	6948	1.70536	482;481;108	ATP1B2;ATP1B1;ADCY2	0.268798	0.570574	0.693226
path:hsa04620	Toll-like receptor signaling pathway	http://www.kegg.jp/kegg-bin/show_pathway?hsa04620/5295%09red/10333%09red/5608%09red/10000%09red	4	171	106	6948	1.54604	5295;10333;5608;10000	PIK3R1;TLR6;MAP2K6;AKT3	0.271579	0.566103	0.693226
path:hsa04520	Adherens junction	http://www.kegg.jp/kegg-bin/show_pathway?hsa04520/4233%09red/25945%09red/7048%09red	3	171	73	6948	1.68175	4233;25945;7048	MET;PVRL3;TGFBR2	0.275347	0.56012	0.693226
path:hsa05220	Chronic myeloid leukemia	http://www.kegg.jp/kegg-bin/show_pathway?hsa05220/5295%09red/7048%09red/10000%09red	3	171	73	6948	1.68175	5295;7048;10000	PIK3R1;TGFBR2;AKT3	0.275347	0.56012	0.693226
path:hsa05200	Pathways in cancer	http://www.kegg.jp/kegg-bin/show_pathway?hsa05200/5295%09red/2263%09red/3815%09red/4233%09red/7048%09red/2308%09red/108%09red/4254%09red/5332%09red/367%09red/8326%09red/10000%09red	12	171	398	6948	1.24206	5295;2263;3815;4233;7048;2308;108;4254;5332;367;8326;10000	PIK3R1;FGFR2;KIT;MET;TGFBR2;FOXO1;ADCY2;KITLG;PLCB4;AR;FZD9;AKT3	0.280501	0.552065	0.697991
path:hsa05202	Transcriptional misregulation in cancer	http://www.kegg.jp/kegg-bin/show_pathway?hsa05202/604%09red/2078%09red/4233%09red/7048%09red/2308%09red/8861%09red	6	171	179	6948	1.37511	604;2078;4233;7048;2308;8861	BCL6;ERG;MET;TGFBR2;FOXO1;LDB1	0.284999	0.545157	0.701031
path:hsa04668	TNF signaling pathway	http://www.kegg.jp/kegg-bin/show_pathway?hsa04668/5295%09red/4217%09red/5608%09red/10000%09red	4	171	110	6948	1.48895	5295;4217;5608;10000	PIK3R1;MAP3K5;MAP2K6;AKT3	0.293127	0.532945	0.712831
path:hsa04725	Cholinergic synapse	http://www.kegg.jp/kegg-bin/show_pathway?hsa04725/5295%09red/108%09red/5332%09red/10000%09red	4	171	112	6948	1.46193	5295;108;5332;10000	PIK3R1;ADCY2;PLCB4;AKT3	0.303988	0.517143	0.730938
path:hsa04724	Glutamatergic synapse	http://www.kegg.jp/kegg-bin/show_pathway?hsa04724/81539%09red/108%09red/5332%09red/10991%09red	4	171	115	6948	1.42317	81539;108;5332;10991	SLC38A1;ADCY2;PLCB4;SLC38A3	0.320361	0.49436	0.742228
path:hsa04932	Non-alcoholic fatty liver disease (NAFLD)	http://www.kegg.jp/kegg-bin/show_pathway?hsa04932/5563%09red/5295%09red/6720%09red/4217%09red/10000%09red	5	171	151	6948	1.35582	5563;5295;6720;4217;10000	PRKAA2;PIK3R1;SREBF1;MAP3K5;AKT3	0.320679	0.493929	0.742228
path:hsa00604	Glycosphingolipid biosynthesis - ganglio series	http://www.kegg.jp/kegg-bin/show_pathway?hsa00604/30815%09red	1	171	15	6948	2.71882	30815	ST6GALNAC6	0.322557	0.491393	0.742228
path:hsa00533	Glycosaminoglycan biosynthesis - keratan sulfate	http://www.kegg.jp/kegg-bin/show_pathway?hsa00533/93010%09red	1	171	15	6948	2.71882	93010	B3GNT7	0.322557	0.491393	0.742228
path:hsa04390	Hippo signaling pathway	http://www.kegg.jp/kegg-bin/show_pathway?hsa04390/7048%09red/10207%09red/5590%09red/60485%09red/8326%09red	5	171	154	6948	1.32882	7048;10207;5590;60485;8326	TGFBR2;INADL;PRKCZ;SAV1;FZD9	0.334987	0.474972	0.752865
path:hsa04146	Peroxisome	http://www.kegg.jp/kegg-bin/show_pathway?hsa04146/51555%09red/2053%09red/23417%09red	3	171	83	6948	1.47698	51555;2053;23417	PEX5L;EPHX2;MLYCD	0.341382	0.466759	0.752865
path:hsa04722	Neurotrophin signaling pathway	http://www.kegg.jp/kegg-bin/show_pathway?hsa04722/5295%09red/4915%09red/4217%09red/10000%09red	4	171	120	6948	1.36287	5295;4915;4217;10000	PIK3R1;NTRK2;MAP3K5;AKT3	0.347787	0.458687	0.752865
path:hsa00450	Selenocompound metabolism	http://www.kegg.jp/kegg-bin/show_pathway?hsa00450/1491%09red	1	171	17	6948	2.39827	1491	CTH	0.354785	0.450035	0.752865
path:hsa01210	2-Oxocarboxylic acid metabolism	http://www.kegg.jp/kegg-bin/show_pathway?hsa01210/586%09red	1	171	17	6948	2.39827	586	BCAT1	0.354785	0.450035	0.752865
path:hsa04921	Oxytocin signaling pathway	http://www.kegg.jp/kegg-bin/show_pathway?hsa04921/5563%09red/5295%09red/108%09red/5332%09red/4882%09red	5	171	159	6948	1.28609	5563;5295;108;5332;4882	PRKAA2;PIK3R1;ADCY2;PLCB4;NPR2	0.35895	0.444966	0.752865
path:hsa04210	Apoptosis	http://www.kegg.jp/kegg-bin/show_pathway?hsa04210/5295%09red/100506742%09red/10000%09red	3	171	86	6948	1.42483	5295;100506742;10000	PIK3R1;CASP12;AKT3	0.361199	0.442253	0.752865
path:hsa04913	Ovarian steroidogenesis	http://www.kegg.jp/kegg-bin/show_pathway?hsa04913/108%09red/51478%09red	2	171	51	6948	1.60042	108;51478	ADCY2;HSD17B7	0.365119	0.437566	0.752865
path:hsa04012	ErbB signaling pathway	http://www.kegg.jp/kegg-bin/show_pathway?hsa04012/5295%09red/5063%09red/10000%09red	3	171	87	6948	1.40825	5295;5063;10000	PIK3R1;PAK3;AKT3	0.367788	0.434402	0.752865
path:hsa05213	Endometrial cancer	http://www.kegg.jp/kegg-bin/show_pathway?hsa05213/5295%09red/10000%09red	2	171	52	6948	1.56941	5295;10000	PIK3R1;AKT3	0.373793	0.427369	0.752865
path:hsa04540	Gap junction	http://www.kegg.jp/kegg-bin/show_pathway?hsa04540/108%09red/5592%09red/5332%09red	3	171	89	6948	1.3762	108;5592;5332	ADCY2;PRKG1;PLCB4	0.38093	0.419154	0.752865
path:hsa04727	GABAergic synapse	http://www.kegg.jp/kegg-bin/show_pathway?hsa04727/81539%09red/108%09red/10991%09red	3	171	89	6948	1.3762	81539;108;10991	SLC38A1;ADCY2;SLC38A3	0.38093	0.419154	0.752865
path:hsa00531	Glycosaminoglycan degradation	http://www.kegg.jp/kegg-bin/show_pathway?hsa00531/60495%09red	1	171	19	6948	2.1452	60495	HPSE2	0.385488	0.413989	0.752865
path:hsa04974	Protein digestion and absorption	http://www.kegg.jp/kegg-bin/show_pathway?hsa04974/482%09red/481%09red/8645%09red	3	171	90	6948	1.36071	482;481;8645	ATP1B2;ATP1B1;KCNK5	0.38748	0.41175	0.752865
path:hsa05150	Staphylococcus aureus infection	http://www.kegg.jp/kegg-bin/show_pathway?hsa05150/3075%09red/727%09red	2	171	55	6948	1.48316	3075;727	CFH;C5	0.399519	0.398463	0.752865
path:hsa00220	Arginine biosynthesis	http://www.kegg.jp/kegg-bin/show_pathway?hsa00220/445%09red	1	171	20	6948	2.03765	445	ASS1	0.40029	0.397625	0.752865
path:hsa00670	One carbon pool by folate	http://www.kegg.jp/kegg-bin/show_pathway?hsa00670/10840%09red	1	171	20	6948	2.03765	10840	ALDH1L1	0.40029	0.397625	0.752865
path:hsa05032	Morphine addiction	http://www.kegg.jp/kegg-bin/show_pathway?hsa05032/134%09red/108%09red/5153%09red	3	171	92	6948	1.33075	134;108;5153	ADORA1;ADCY2;PDE1B	0.400531	0.397364	0.752865
path:hsa04912	GnRH signaling pathway	http://www.kegg.jp/kegg-bin/show_pathway?hsa04912/108%09red/5332%09red/5608%09red	3	171	92	6948	1.33075	108;5332;5608	ADCY2;PLCB4;MAP2K6	0.400531	0.397364	0.752865
path:hsa04666	Fc gamma R-mediated phagocytosis	http://www.kegg.jp/kegg-bin/show_pathway?hsa04666/85477%09red/5295%09red/10000%09red	3	171	92	6948	1.33075	85477;5295;10000	SCIN;PIK3R1;AKT3	0.400531	0.397364	0.752865
path:hsa04141	Protein processing in endoplasmic reticulum	http://www.kegg.jp/kegg-bin/show_pathway?hsa04141/5071%09red/4217%09red/100506742%09red/6747%09red/258010%09red	5	171	169	6948	1.20821	5071;4217;100506742;6747;258010	PARK2;MAP3K5;CASP12;SSR3;SVIP	0.40698	0.390427	0.752865
path:hsa05223	Non-small cell lung cancer	http://www.kegg.jp/kegg-bin/show_pathway?hsa05223/5295%09red/10000%09red	2	171	56	6948	1.45647	5295;10000	PIK3R1;AKT3	0.407987	0.389354	0.752865
path:hsa04380	Osteoclast differentiation	http://www.kegg.jp/kegg-bin/show_pathway?hsa04380/5295%09red/7048%09red/5608%09red/10000%09red	4	171	131	6948	1.24642	5295;7048;5608;10000	PIK3R1;TGFBR2;MAP2K6;AKT3	0.408095	0.389239	0.752865
path:hsa04713	Circadian entrainment	http://www.kegg.jp/kegg-bin/show_pathway?hsa04713/108%09red/5592%09red/5332%09red	3	171	96	6948	1.27455	108;5592;5332	ADCY2;PRKG1;PLCB4	0.426391	0.370192	0.779895
path:hsa00230	Purine metabolism	http://www.kegg.jp/kegg-bin/show_pathway?hsa00230/122622%09red/108%09red/221264%09red/5153%09red/4882%09red	5	171	175	6948	1.16575	122622;108;221264;5153;4882	ADSSL1;ADCY2;AK9;PDE1B;NPR2	0.435627	0.360885	0.790036
path:hsa04730	Long-term depression	http://www.kegg.jp/kegg-bin/show_pathway?hsa04730/5592%09red/5332%09red	2	171	60	6948	1.35858	5592;5332	PRKG1;PLCB4	0.44126	0.355305	0.792626
path:hsa04370	VEGF signaling pathway	http://www.kegg.jp/kegg-bin/show_pathway?hsa04370/5295%09red/10000%09red	2	171	61	6948	1.33611	5295;10000	PIK3R1;AKT3	0.44942	0.347348	0.792626
path:hsa00534	Glycosaminoglycan biosynthesis - heparan sulfate / heparin	http://www.kegg.jp/kegg-bin/show_pathway?hsa00534/9955%09red	1	171	24	6948	1.69706	9955	HS3ST3A1	0.456038	0.340999	0.792626
path:hsa00590	Arachidonic acid metabolism	http://www.kegg.jp/kegg-bin/show_pathway?hsa00590/2878%09red/2053%09red	2	171	62	6948	1.31437	2878;2053	GPX3;EPHX2	0.457512	0.339597	0.792626
path:hsa05231	Choline metabolism in cancer	http://www.kegg.jp/kegg-bin/show_pathway?hsa05231/6584%09red/5295%09red/10000%09red	3	171	101	6948	1.21057	6584;5295;10000	SLC22A5;PIK3R1;AKT3	0.458158	0.338984	0.792626
path:hsa04020	Calcium signaling pathway	http://www.kegg.jp/kegg-bin/show_pathway?hsa04020/154%09red/108%09red/5153%09red/5332%09red/10800%09red	5	171	180	6948	1.13253	154;108;5153;5332;10800	ADRB2;ADCY2;PDE1B;PLCB4;CYSLTR1	0.459279	0.337924	0.792626
path:hsa04550	Signaling pathways regulating pluripotency of stem cells	http://www.kegg.jp/kegg-bin/show_pathway?hsa04550/5295%09red/2263%09red/8326%09red/10000%09red	4	171	142	6948	1.14801	5295;2263;8326;10000	PIK3R1;FGFR2;FZD9;AKT3	0.467285	0.330418	0.799992
path:hsa05321	Inflammatory bowel disease (IBD)	http://www.kegg.jp/kegg-bin/show_pathway?hsa05321/6097%09red/3595%09red	2	171	65	6948	1.25316	6097;3595	RORC;IL12RB2	0.481373	0.317518	0.80174
path:hsa00830	Retinol metabolism	http://www.kegg.jp/kegg-bin/show_pathway?hsa00830/316%09red/1577%09red	2	171	65	6948	1.25316	316;1577	AOX1;CYP3A5	0.481373	0.317518	0.80174
path:hsa05214	Glioma	http://www.kegg.jp/kegg-bin/show_pathway?hsa05214/5295%09red/10000%09red	2	171	65	6948	1.25316	5295;10000	PIK3R1;AKT3	0.481373	0.317518	0.80174
path:hsa04151	PI3K-Akt signaling pathway	http://www.kegg.jp/kegg-bin/show_pathway?hsa04151/5563%09red/5295%09red/2263%09red/5618%09red/3815%09red/4233%09red/5590%09red/4254%09red/10000%09red	9	171	346	6948	1.06005	5563;5295;2263;5618;3815;4233;5590;4254;10000	PRKAA2;PIK3R1;FGFR2;PRLR;KIT;MET;PRKCZ;KITLG;AKT3	0.483292	0.315791	0.80174
path:hsa04966	Collecting duct acid secretion	http://www.kegg.jp/kegg-bin/show_pathway?hsa04966/51382%09red	1	171	27	6948	1.50784	51382	ATP6V1D	0.494439	0.305888	0.809096
path:hsa04062	Chemokine signaling pathway	http://www.kegg.jp/kegg-bin/show_pathway?hsa04062/5295%09red/108%09red/5590%09red/5332%09red/10000%09red	5	171	188	6948	1.08306	5295;108;5590;5332;10000	PIK3R1;ADCY2;PRKCZ;PLCB4;AKT3	0.496515	0.304068	0.809096
path:hsa05120	Epithelial cell signaling in Helicobacter pylori infection	http://www.kegg.jp/kegg-bin/show_pathway?hsa05120/51382%09red/4233%09red	2	171	68	6948	1.19735	51382;4233	ATP6V1D;MET	0.504584	0.297067	0.809096
path:hsa00630	Glyoxylate and dicarboxylate metabolism	http://www.kegg.jp/kegg-bin/show_pathway?hsa00630/81888%09red	1	171	28	6948	1.45378	81888	HYI	0.50663	0.295309	0.809096
path:hsa00640	Propanoate metabolism	http://www.kegg.jp/kegg-bin/show_pathway?hsa00640/23417%09red	1	171	28	6948	1.45378	23417	MLYCD	0.50663	0.295309	0.809096
path:hsa00030	Pentose phosphate pathway	http://www.kegg.jp/kegg-bin/show_pathway?hsa00030/414328%09red	1	171	29	6948	1.40345	414328	IDNK	0.51853	0.285226	0.811182
path:hsa00760	Nicotinate and nicotinamide metabolism	http://www.kegg.jp/kegg-bin/show_pathway?hsa00760/316%09red	1	171	29	6948	1.40345	316	AOX1	0.51853	0.285226	0.811182
path:hsa05016	Huntington's disease	http://www.kegg.jp/kegg-bin/show_pathway?hsa05016/1768%09red/10891%09red/27019%09red/127602%09red/5332%09red	5	171	193	6948	1.05422	1768;10891;27019;127602;5332	DNAH6;PPARGC1A;DNAI1;DNAH14;PLCB4	0.519308	0.284575	0.811182
path:hsa04114	Oocyte meiosis	http://www.kegg.jp/kegg-bin/show_pathway?hsa04114/22849%09red/108%09red/367%09red	3	171	113	6948	1.08012	22849;108;367	CPEB3;ADCY2;AR	0.531092	0.27483	0.822859
path:hsa04662	B cell receptor signaling pathway	http://www.kegg.jp/kegg-bin/show_pathway?hsa04662/5295%09red/10000%09red	2	171	72	6948	1.13018	5295;10000	PIK3R1;AKT3	0.534474	0.272073	0.822859
path:hsa00514	Other types of O-glycan biosynthesis	http://www.kegg.jp/kegg-bin/show_pathway?hsa00514/23127%09red	1	171	31	6948	1.31252	23127	COLGALT2	0.541479	0.266418	0.827689
path:hsa05412	Arrhythmogenic right ventricular cardiomyopathy (ARVC)	http://www.kegg.jp/kegg-bin/show_pathway?hsa05412/1832%09red/6442%09red	2	171	74	6948	1.09931	1832;6442	DSP;SGCA	0.548953	0.260465	0.833163
path:hsa05133	Pertussis	http://www.kegg.jp/kegg-bin/show_pathway?hsa05133/710%09red/727%09red	2	171	75	6948	1.0845	710;727	SERPING1;C5	0.556074	0.254867	0.836578
path:hsa05145	Toxoplasmosis	http://www.kegg.jp/kegg-bin/show_pathway?hsa05145/5295%09red/5608%09red/10000%09red	3	171	118	6948	1.0336	5295;5608;10000	PIK3R1;MAP2K6;AKT3	0.559843	0.251934	0.836578
path:hsa04130	SNARE interactions in vesicular transport	http://www.kegg.jp/kegg-bin/show_pathway?hsa04130/55014%09red	1	171	34	6948	1.19619	55014	STX17	0.57388	0.241179	0.836578
path:hsa05143	African trypanosomiasis	http://www.kegg.jp/kegg-bin/show_pathway?hsa05143/5332%09red	1	171	34	6948	1.19619	5332	PLCB4	0.57388	0.241179	0.836578
path:hsa04260	Cardiac muscle contraction	http://www.kegg.jp/kegg-bin/show_pathway?hsa04260/482%09red/481%09red	2	171	78	6948	1.04233	482;481	ATP1B2;ATP1B1	0.576959	0.238855	0.836578
path:hsa05100	Bacterial invasion of epithelial cells	http://www.kegg.jp/kegg-bin/show_pathway?hsa05100/5295%09red/4233%09red	2	171	78	6948	1.04233	5295;4233	PIK3R1;MET	0.576959	0.238855	0.836578
path:hsa04510	Focal adhesion	http://www.kegg.jp/kegg-bin/show_pathway?hsa04510/5295%09red/394%09red/4233%09red/5063%09red/10000%09red	5	171	207	6948	0.98088	5295;394;4233;5063;10000	PIK3R1;ARHGAP5;MET;PAK3;AKT3	0.580655	0.236082	0.836578
path:hsa00350	Tyrosine metabolism	http://www.kegg.jp/kegg-bin/show_pathway?hsa00350/316%09red	1	171	35	6948	1.16185	316	AOX1	0.584166	0.233464	0.836578
path:hsa04350	TGF-beta signaling pathway	http://www.kegg.jp/kegg-bin/show_pathway?hsa04350/7048%09red/1634%09red	2	171	80	6948	1.01598	7048;1634	TGFBR2;DCN	0.590482	0.228793	0.836578
path:hsa04110	Cell cycle	http://www.kegg.jp/kegg-bin/show_pathway?hsa04110/7029%09red/5000%09red/23595%09red	3	171	124	6948	0.982719	7029;5000;23595	TFDP2;ORC4;ORC3	0.592918	0.227005	0.836578
path:hsa00040	Pentose and glucuronate interconversions	http://www.kegg.jp/kegg-bin/show_pathway?hsa00040/51181%09red	1	171	36	6948	1.12941	51181	DCXR	0.594205	0.226064	0.836578
path:hsa04010	MAPK signaling pathway	http://www.kegg.jp/kegg-bin/show_pathway?hsa04010/2263%09red/4915%09red/4217%09red/7048%09red/5608%09red/10000%09red	6	171	256	6948	0.950568	2263;4915;4217;7048;5608;10000	FGFR2;NTRK2;MAP3K5;TGFBR2;MAP2K6;AKT3	0.606275	0.217331	0.84441
path:hsa05410	Hypertrophic cardiomyopathy (HCM)	http://www.kegg.jp/kegg-bin/show_pathway?hsa05410/5563%09red/6442%09red	2	171	83	6948	0.978827	5563;6442	PRKAA2;SGCA	0.610164	0.214554	0.84441
path:hsa04144	Endocytosis	http://www.kegg.jp/kegg-bin/show_pathway?hsa04144/2263%09red/154%09red/3815%09red/4233%09red/7048%09red/5590%09red	6	171	258	6948	0.942918	2263;154;3815;4233;7048;5590	FGFR2;ADRB2;KIT;MET;TGFBR2;PRKCZ	0.613738	0.212017	0.84441
path:hsa05166	HTLV-I infection	http://www.kegg.jp/kegg-bin/show_pathway?hsa05166/5295%09red/8850%09red/7048%09red/108%09red/8326%09red/10000%09red	6	171	259	6948	0.939137	5295;8850;7048;108;8326;10000	PIK3R1;KAT2B;TGFBR2;ADCY2;FZD9;AKT3	0.617441	0.209405	0.84441
path:hsa04140	Regulation of autophagy	http://www.kegg.jp/kegg-bin/show_pathway?hsa04140/5563%09red	1	171	39	6948	1.04208	5563	PRKAA2	0.622899	0.205582	0.84441
path:hsa05164	Influenza A	http://www.kegg.jp/kegg-bin/show_pathway?hsa05164/5295%09red/10625%09red/5608%09red/10000%09red	4	171	175	6948	0.927015	5295;10625;5608;10000	PIK3R1;IVNS1ABP;MAP2K6;AKT3	0.628577	0.201641	0.84441
path:hsa05222	Small cell lung cancer	http://www.kegg.jp/kegg-bin/show_pathway?hsa05222/5295%09red/10000%09red	2	171	86	6948	0.944269	5295;10000	PIK3R1;AKT3	0.629122	0.201265	0.84441
path:hsa00380	Tryptophan metabolism	http://www.kegg.jp/kegg-bin/show_pathway?hsa00380/316%09red	1	171	40	6948	1.01588	316	AOX1	0.632009	0.199277	0.84441
path:hsa04640	Hematopoietic cell lineage	http://www.kegg.jp/kegg-bin/show_pathway?hsa04640/3815%09red/4254%09red	2	171	87	6948	0.933279	3815;4254	KIT;KITLG	0.635281	0.197034	0.84441
path:hsa05162	Measles	http://www.kegg.jp/kegg-bin/show_pathway?hsa05162/5295%09red/5588%09red/10000%09red	3	171	134	6948	0.908049	5295;5588;10000	PIK3R1;PRKCQ;AKT3	0.644389	0.190852	0.849908
path:hsa05323	Rheumatoid arthritis	http://www.kegg.jp/kegg-bin/show_pathway?hsa05323/51382%09red/8741%09red	2	171	89	6948	0.91204	51382;8741	ATP6V1D;TNFSF13	0.64736	0.188854	0.849908
path:hsa05414	Dilated cardiomyopathy	http://www.kegg.jp/kegg-bin/show_pathway?hsa05414/108%09red/6442%09red	2	171	90	6948	0.901775	108;6442	ADCY2;SGCA	0.653281	0.1849	0.852452
path:hsa03010	Ribosome	http://www.kegg.jp/kegg-bin/show_pathway?hsa03010/6204%09red/6168%09red/6135%09red	3	171	137	6948	0.887774	6204;6168;6135	RPS10;RPL37A;RPL11	0.658912	0.181173	0.854589
path:hsa00071	Fatty acid degradation	http://www.kegg.jp/kegg-bin/show_pathway?hsa00071/33%09red	1	171	44	6948	0.922995	33	ACADL	0.666309	0.176324	0.858977
path:hsa04310	Wnt signaling pathway	http://www.kegg.jp/kegg-bin/show_pathway?hsa04310/80319%09red/5332%09red/8326%09red	3	171	140	6948	0.868367	80319;5332;8326	CXXC4;PLCB4;FZD9	0.673007	0.17198	0.859026
path:hsa04962	Vasopressin-regulated water reabsorption	http://www.kegg.jp/kegg-bin/show_pathway?hsa04962/1780%09red	1	171	45	6948	0.902353	1780	DYNC1I1	0.674376	0.171098	0.859026
path:hsa00983	Drug metabolism - other enzymes	http://www.kegg.jp/kegg-bin/show_pathway?hsa00983/1806%09red	1	171	46	6948	0.882609	1806	DPYD	0.682248	0.166058	0.863912
path:hsa04672	Intestinal immune network for IgA production	http://www.kegg.jp/kegg-bin/show_pathway?hsa04672/8741%09red	1	171	47	6948	0.863705	8741	TNFSF13	0.689931	0.161194	0.865789
path:hsa01212	Fatty acid metabolism	http://www.kegg.jp/kegg-bin/show_pathway?hsa01212/33%09red	1	171	48	6948	0.845588	33	ACADL	0.69743	0.1565	0.865789
path:hsa04330	Notch signaling pathway	http://www.kegg.jp/kegg-bin/show_pathway?hsa04330/8850%09red	1	171	48	6948	0.845588	8850	KAT2B	0.69743	0.1565	0.865789
path:hsa05161	Hepatitis B	http://www.kegg.jp/kegg-bin/show_pathway?hsa05161/5295%09red/100506742%09red/10000%09red	3	171	146	6948	0.831947	5295;100506742;10000	PIK3R1;CASP12;AKT3	0.699913	0.154956	0.865789
path:hsa05144	Malaria	http://www.kegg.jp/kegg-bin/show_pathway?hsa05144/4233%09red	1	171	49	6948	0.828211	4233	MET	0.704748	0.151966	0.866759
path:hsa04723	Retrograde endocannabinoid signaling	http://www.kegg.jp/kegg-bin/show_pathway?hsa04723/108%09red/5332%09red	2	171	102	6948	0.794292	108;5332	ADCY2;PLCB4	0.718293	0.143698	0.87837
path:hsa04066	HIF-1 signaling pathway	http://www.kegg.jp/kegg-bin/show_pathway?hsa04066/5295%09red/10000%09red	2	171	103	6948	0.786465	5295;10000	PIK3R1;AKT3	0.723223	0.140728	0.879373
path:hsa04145	Phagosome	http://www.kegg.jp/kegg-bin/show_pathway?hsa04145/51382%09red/10333%09red/1780%09red	3	171	153	6948	0.793067	51382;10333;1780	ATP6V1D;TLR6;DYNC1I1	0.729157	0.137179	0.880953
path:hsa00240	Pyrimidine metabolism	http://www.kegg.jp/kegg-bin/show_pathway?hsa00240/1806%09red/221264%09red	2	171	105	6948	0.77126	1806;221264	DPYD;AK9	0.732865	0.134976	0.880953
path:hsa05110	Vibrio cholerae infection	http://www.kegg.jp/kegg-bin/show_pathway?hsa05110/51382%09red	1	171	54	6948	0.75098	51382	ATP6V1D	0.738782	0.131484	0.880953
path:hsa05217	Basal cell carcinoma	http://www.kegg.jp/kegg-bin/show_pathway?hsa05217/8326%09red	1	171	55	6948	0.737219	8326	FZD9	0.745105	0.127783	0.880953
path:hsa05130	Pathogenic Escherichia coli infection	http://www.kegg.jp/kegg-bin/show_pathway?hsa05130/3875%09red	1	171	55	6948	0.737219	3875	KRT18	0.745105	0.127783	0.880953
path:hsa05146	Amoebiasis	http://www.kegg.jp/kegg-bin/show_pathway?hsa05146/5295%09red/5332%09red	2	171	109	6948	0.742522	5295;5332	PIK3R1;PLCB4	0.751299	0.124187	0.883395
path:hsa05416	Viral myocarditis	http://www.kegg.jp/kegg-bin/show_pathway?hsa05416/6442%09red	1	171	58	6948	0.698783	6442	SGCA	0.763176	0.117375	0.892458
path:hsa04810	Regulation of actin cytoskeleton	http://www.kegg.jp/kegg-bin/show_pathway?hsa04810/85477%09red/5295%09red/2263%09red/5063%09red	4	171	214	6948	0.753708	85477;5295;2263;5063	SCIN;PIK3R1;FGFR2;PAK3	0.774455	0.111004	0.900725
path:hsa04670	Leukocyte transendothelial migration	http://www.kegg.jp/kegg-bin/show_pathway?hsa04670/5295%09red/394%09red	2	171	118	6948	0.684986	5295;394	PIK3R1;ARHGAP5	0.788827	0.103018	0.909509
path:hsa04721	Synaptic vesicle cycle	http://www.kegg.jp/kegg-bin/show_pathway?hsa04721/51382%09red	1	171	63	6948	0.642857	51382	ATP6V1D	0.790508	0.102094	0.909509
path:hsa00970	Aminoacyl-tRNA biosynthesis	http://www.kegg.jp/kegg-bin/show_pathway?hsa00970/123283%09red	1	171	66	6948	0.613369	123283	TARSL2	0.805377	0.0940007	0.917252
path:hsa04080	Neuroactive ligand-receptor interaction	http://www.kegg.jp/kegg-bin/show_pathway?hsa04080/7068%09red/154%09red/5618%09red/134%09red/10800%09red	5	171	275	6948	0.730887	7068;154;5618;134;10800	THRB;ADRB2;PRLR;ADORA1;CYSLTR1	0.809403	0.0918354	0.917252
path:hsa04720	Long-term potentiation	http://www.kegg.jp/kegg-bin/show_pathway?hsa04720/5332%09red	1	171	67	6948	0.604126	5332	PLCB4	0.810096	0.0914633	0.917252
path:hsa03320	PPAR signaling pathway	http://www.kegg.jp/kegg-bin/show_pathway?hsa03320/33%09red	1	171	69	6948	0.586445	33	ACADL	0.819196	0.086612	0.922674
path:hsa04728	Dopaminergic synapse	http://www.kegg.jp/kegg-bin/show_pathway?hsa04728/5332%09red/10000%09red	2	171	130	6948	0.620665	5332;10000	PLCB4;AKT3	0.831098	0.0803476	0.930357
path:hsa03040	Spliceosome	http://www.kegg.jp/kegg-bin/show_pathway?hsa03040/9129%09red/6626%09red	2	171	133	6948	0.606398	9129;6626	PRPF3;SNRPA	0.840409	0.0755094	0.930357
path:hsa05160	Hepatitis C	http://www.kegg.jp/kegg-bin/show_pathway?hsa05160/5295%09red/10000%09red	2	171	133	6948	0.606398	5295;10000	PIK3R1;AKT3	0.840409	0.0755094	0.930357
path:hsa05322	Systemic lupus erythematosus	http://www.kegg.jp/kegg-bin/show_pathway?hsa05322/317772%09red/727%09red	2	171	134	6948	0.601784	317772;727	HIST2H2AB;C5	0.843408	0.0739622	0.930357
path:hsa03018	RNA degradation	http://www.kegg.jp/kegg-bin/show_pathway?hsa03018/10140%09red	1	171	77	6948	0.524905	10140	TOB1	0.851461	0.0698354	0.930358
path:hsa04120	Ubiquitin mediated proteolysis	http://www.kegg.jp/kegg-bin/show_pathway?hsa04120/5071%09red/55070%09red	2	171	137	6948	0.588347	5071;55070	PARK2;DET1	0.852104	0.0695076	0.930358
path:hsa05169	Epstein-Barr virus infection	http://www.kegg.jp/kegg-bin/show_pathway?hsa05169/5295%09red/5608%09red/10000%09red	3	171	201	6948	0.599414	5295;5608;10000	PIK3R1;MAP2K6;AKT3	0.873516	0.0587292	0.945726
path:hsa05132	Salmonella infection	http://www.kegg.jp/kegg-bin/show_pathway?hsa05132/1780%09red	1	171	86	6948	0.469357	1780	DYNC1I1	0.880961	0.0550431	0.945726
path:hsa05203	Viral carcinogenesis	http://www.kegg.jp/kegg-bin/show_pathway?hsa05203/85477%09red/5295%09red/8850%09red	3	171	206	6948	0.584431	85477;5295;8850	SCIN;PIK3R1;KAT2B	0.883749	0.0536711	0.945726
path:hsa03008	Ribosome biogenesis in eukaryotes	http://www.kegg.jp/kegg-bin/show_pathway?hsa03008/2091%09red	1	171	87	6948	0.463895	2091	FBL	0.883856	0.0536184	0.945726
path:hsa04064	NF-kappa B signaling pathway	http://www.kegg.jp/kegg-bin/show_pathway?hsa04064/5588%09red	1	171	91	6948	0.443245	5588	PRKCQ	0.894752	0.0482975	0.952621
path:hsa05010	Alzheimer's disease	http://www.kegg.jp/kegg-bin/show_pathway?hsa05010/100506742%09red/5332%09red	2	171	168	6948	0.477599	100506742;5332	CASP12;PLCB4	0.919401	0.036495	0.974019
path:hsa05152	Tuberculosis	http://www.kegg.jp/kegg-bin/show_pathway?hsa05152/10333%09red/10000%09red	2	171	177	6948	0.452713	10333;10000	TLR6;AKT3	0.932762	0.0302291	0.975298
path:hsa05034	Alcoholism	http://www.kegg.jp/kegg-bin/show_pathway?hsa05034/4915%09red/317772%09red	2	171	179	6948	0.447522	4915;317772	NTRK2;HIST2H2AB	0.935434	0.0289868	0.975298
path:hsa01200	Carbon metabolism	http://www.kegg.jp/kegg-bin/show_pathway?hsa01200/414328%09red	1	171	113	6948	0.355804	414328	IDNK	0.938839	0.027409	0.975298
path:hsa04726	Serotonergic synapse	http://www.kegg.jp/kegg-bin/show_pathway?hsa04726/5332%09red	1	171	113	6948	0.355804	5332	PLCB4	0.938839	0.027409	0.975298
path:hsa04142	Lysosome	http://www.kegg.jp/kegg-bin/show_pathway?hsa04142/22901%09red	1	171	123	6948	0.326399	22901	ARSG	0.952239	0.0212541	0.98444
path:hsa00190	Oxidative phosphorylation	http://www.kegg.jp/kegg-bin/show_pathway?hsa00190/51382%09red	1	171	133	6948	0.301415	51382	ATP6V1D	0.962716	0.0165017	0.98471
path:hsa04650	Natural killer cell mediated cytotoxicity	http://www.kegg.jp/kegg-bin/show_pathway?hsa04650/5295%09red	1	171	134	6948	0.299122	5295	PIK3R1	0.963629	0.0160901	0.98471
path:hsa04514	Cell adhesion molecules (CAMs)	http://www.kegg.jp/kegg-bin/show_pathway?hsa04514/25945%09red	1	171	142	6948	0.281939	25945	PVRL3	0.970175	0.01315	0.98471
path:hsa05012	Parkinson's disease	http://www.kegg.jp/kegg-bin/show_pathway?hsa05012/5071%09red	1	171	143	6948	0.279926	5071	PARK2	0.970906	0.0128229	0.98471
path:hsa05168	Herpes simplex infection	http://www.kegg.jp/kegg-bin/show_pathway?hsa05168/727%09red	1	171	184	6948	0.21624	727	C5	0.989516	0.00457733	0.994837
path:hsa04740	Olfactory transduction	http://www.kegg.jp/kegg-bin/show_pathway?hsa04740/390063%09red/5592%09red/390067%09red/401427%09red	4	171	407	6948	0.38494	390063;5592;390067;401427	OR51I1;PRKG1;OR52H1;OR2A7	0.990853	0.00399091	0.994837
path:hsa05206	MicroRNAs in cancer	http://www.kegg.jp/kegg-bin/show_pathway?hsa05206/4233%09red/3236%09red	2	171	297	6948	0.265017	4233;3236	MET;HOXD10	0.994837	0.0022481	0.994837
