# Supplementary material for: lnc-SAMD14-4 can regulate expression of the COL1A1 and COL1A2 in human chondrocytes
Source: PeerJ. 2019 Sep 2;7:e7491. doi: 10.7717/peerj.7491 (PMC6727836; doi:10.7717/peerj.7491)
Supplement: Table S12 [file peerj-07-7491-s018.xlsx]

## Sheet: Supplementary Table 10
Term_ID	Term_description	Term_url	ListHit	ListTotal	PopHit	PopTotal	FoldEnrichment	Genes	GeneSymbols	P_value	"-log10(pvalue)"	FDR_bh
path:hsa04510	Focal adhesion	http://www.kegg.jp/kegg-bin/show_pathway?hsa04510/1291%09green/330%09green/1499%09green/1284%09green/3791%09green/7424%09green/3693%09green/1282%09green/1277%09green/2885%09green/10627%09green/5880%09green/387%09green/3688%09green/1293%09green/22801%09green/6714%09green/3915%09green/3690%09green/5594%09green/7058%09green/87%09green/2316%09green/255631%09green/3725%09green/5159%09green/824%09green…	53	585	207	6948	3.24428	1291;330;1499;1284;3791;7424;3693;1282;1277;2885;10627;5880;387;3688;1293;22801;6714;3915;3690;5594;7058;87;2316;255631;3725;5159;824;1289;7791;284217;3479;3679;5501;10398;1278;5294;1292;595;7059;5228;998;56034;3685;7423;1280;3912;5058;5728;7414;3371;2534;3611;3910	COL6A1;BIRC3;CTNNB1;COL4A2;KDR;VEGFC;ITGB5;COL4A1;COL1A1;GRB2;MYL12A;RAC2;RHOA;ITGB1;COL6A3;ITGA11;SRC;LAMC1;ITGB3;MAPK1;THBS2;ACTN1;FLNA;COL24A1;JUN;PDGFRB;CAPN2;COL5A1;ZYX;LAMA1;IGF1;ITGA7;PPP1CC;MYL9;COL1A2;PIK3CG;COL6A2;CCND1;THBS3;PGF;CDC42;PDGFC;ITGAV;VEGFB;COL2A1;LAMB1;PAK1;PTEN;VCL;TNC;FYN;ILK;LAMA4	3.29524e-11	10.4821	8.83125e-09
path:hsa05200	Pathways in cancer	http://www.kegg.jp/kegg-bin/show_pathway?hsa05200/330%09green/1499%09green/3091%09green/1284%09green/2773%09green/1164%09green/7424%09green/1282%09green/2252%09green/867%09green/2885%09green/5880%09green/387%09green/3688%09green/1438%09green/2776%09green/6688%09green/7046%09green/3915%09green/2353%09green/54331%09green/51176%09green/2788%09green/1026%09green/4609%09green/5898%09green/5594%09green…	72	585	398	6948	2.30979	330;1499;3091;1284;2773;1164;7424;1282;2252;867;2885;5880;387;3688;1438;2776;6688;7046;3915;2353;54331;51176;2788;1026;4609;5898;5594;2256;3725;2791;4313;5159;25780;10161;4893;1436;185;284217;355;3479;5732;81029;623;6387;1612;25;8321;4790;3569;113;5294;4318;581;595;637;2255;1021;5228;998;3685;7423;8324;3912;5728;898;7852;10672;2770;7170;1909;5330;3910	BIRC3;CTNNB1;HIF1A;COL4A2;GNAI3;CKS2;VEGFC;COL4A1;FGF7;CBL;GRB2;RAC2;RHOA;ITGB1;CSF2RA;GNAQ;SPI1;TGFBR1;LAMC1;FOS;GNG2;LEF1;GNG7;CDKN1A;MYC;RALA;MAPK1;FGF11;JUN;GNG11;MMP2;PDGFRB;RASGRP3;LPAR6;NRAS;CSF1R;AGTR1;LAMA1;FAS;IGF1;PTGER2;WNT5B;BDKRB1;CXCL12;DAPK1;ABL1;FZD1;NFKB1;IL6;ADCY7;PIK3CG;MMP9;BAX;CCND1;BID;FGF10;CDK6;PGF;CDC42;ITGAV;VEGFB;FZD7;LAMB1;PTEN;CCNE1;CXCR4;GNA13;GNAI1;TPM3;EDNRA;PLCB2…	8.83008e-09	8.05404	1.18323e-06
path:hsa04151	PI3K-Akt signaling pathway	http://www.kegg.jp/kegg-bin/show_pathway?hsa04151/1291%09green/285%09green/1284%09green/3791%09green/7424%09green/118788%09green/3693%09green/1282%09green/2252%09green/3455%09green/1277%09green/2885%09green/3566%09green/3688%09green/1293%09green/22801%09green/3915%09green/54331%09green/2788%09green/1026%09green/4609%09green/3690%09green/7099%09green/5594%09green/7058%09green/2256%09green/255631%0…	65	585	346	6948	2.38512	1291;285;1284;3791;7424;118788;3693;1282;2252;3455;1277;2885;3566;3688;1293;22801;3915;54331;2788;1026;4609;3690;7099;5594;7058;2256;255631;2791;5159;10161;4170;4893;1289;1436;284217;3479;3679;4790;3569;7533;3575;90993;1278;1435;5294;1292;595;7059;54541;2255;1021;5228;6446;56034;3685;7423;1280;3912;284;5728;10018;898;3563;3371;3910	COL6A1;ANGPT2;COL4A2;KDR;VEGFC;PIK3AP1;ITGB5;COL4A1;FGF7;IFNAR2;COL1A1;GRB2;IL4R;ITGB1;COL6A3;ITGA11;LAMC1;GNG2;GNG7;CDKN1A;MYC;ITGB3;TLR4;MAPK1;THBS2;FGF11;COL24A1;GNG11;PDGFRB;LPAR6;MCL1;NRAS;COL5A1;CSF1R;LAMA1;IGF1;ITGA7;NFKB1;IL6;YWHAH;IL7R;CREB3L1;COL1A2;CSF1;PIK3CG;COL6A2;CCND1;THBS3;DDIT4;FGF10;CDK6;PGF;SGK1;PDGFC;ITGAV;VEGFB;COL2A1;LAMB1;ANGPT1;PTEN;BCL2L11;CCNE1;IL3RA;TNC;LAMA4	1.42053e-08	7.84755	1.26901e-06
path:hsa04512	ECM-receptor interaction	http://www.kegg.jp/kegg-bin/show_pathway?hsa04512/1291%09green/1284%09green/948%09green/3339%09green/3693%09green/1282%09green/1277%09green/3688%09green/1293%09green/375790%09green/22801%09green/3915%09green/3690%09green/7058%09green/255631%09green/1289%09green/284217%09green/3679%09green/1278%09green/1292%09green/7059%09green/3685%09green/960%09green/1280%09green/3912%09green/3371%09green/3910%0…	27	585	87	6948	3.81591	1291;1284;948;3339;3693;1282;1277;3688;1293;375790;22801;3915;3690;7058;255631;1289;284217;3679;1278;1292;7059;3685;960;1280;3912;3371;3910	COL6A1;COL4A2;CD36;HSPG2;ITGB5;COL4A1;COL1A1;ITGB1;COL6A3;AGRN;ITGA11;LAMC1;ITGB3;THBS2;COL24A1;COL5A1;LAMA1;ITGA7;COL1A2;COL6A2;THBS3;ITGAV;CD44;COL2A1;LAMB1;TNC;LAMA4	1.0553e-07	6.97662	6.50598e-06
path:hsa04145	Phagosome	http://www.kegg.jp/kegg-bin/show_pathway?hsa04145/4689%09green/715%09green/2212%09green/948%09green/8685%09green/3684%09green/3693%09green/9902%09green/3688%09green/23545%09green/203068%09green/3127%09green/3690%09green/7099%09green/526%09green/3920%09green/7058%09green/9114%09green/523%09green/1520%09green/9103%09green/2215%09green/84790%09green/3109%09green/23480%09green/7059%09green/4481%09gre…	37	585	153	6948	2.9986	4689;715;2212;948;8685;3684;3693;9902;3688;23545;203068;3127;3690;7099;526;3920;7058;9114;523;1520;9103;2215;84790;3109;23480;7059;4481;1536;3122;3118;3685;533;7846;4360;7280;3108;10312	NCF4;C1R;FCGR2A;CD36;MARCO;ITGAM;ITGB5;MRC2;ITGB1;ATP6V0A2;TUBB;HLA-DRB5;ITGB3;TLR4;ATP6V1B2;LAMP2;THBS2;ATP6V0D1;ATP6V1A;CTSS;FCGR2C;FCGR3B;TUBA1C;HLA-DMB;SEC61G;THBS3;MSR1;CYBB;HLA-DRA;HLA-DQA2;ITGAV;ATP6V0B;TUBA1A;MRC1;TUBB2A;HLA-DMA;TCIRG1	1.2138e-07	6.91585	6.50598e-06
path:hsa05323	Rheumatoid arthritis	http://www.kegg.jp/kegg-bin/show_pathway?hsa05323/23545%09green/942%09green/2353%09green/3553%09green/3127%09green/7099%09green/526%09green/8600%09green/3725%09green/10673%09green/9114%09green/523%09green/1513%09green/6387%09green/3569%09green/6352%09green/1435%09green/3109%09green/3122%09green/3118%09green/533%09green/284%09green/6347%09green/3606%09green/3108%09green/10312%09green/940%09green	27	585	89	6948	3.72907	23545;942;2353;3553;3127;7099;526;8600;3725;10673;9114;523;1513;6387;3569;6352;1435;3109;3122;3118;533;284;6347;3606;3108;10312;940	ATP6V0A2;CD86;FOS;IL1B;HLA-DRB5;TLR4;ATP6V1B2;TNFSF11;JUN;TNFSF13B;ATP6V0D1;ATP6V1A;CTSK;CXCL12;IL6;CCL5;CSF1;HLA-DMB;HLA-DRA;HLA-DQA2;ATP6V0B;ANGPT1;CCL2;IL18;HLA-DMA;TCIRG1;CD28	1.54898e-07	6.80995	6.62448e-06
path:hsa05150	Staphylococcus aureus infection	http://www.kegg.jp/kegg-bin/show_pathway?hsa05150/715%09green/2212%09green/714%09green/3684%09green/2357%09green/712%09green/3127%09green/5724%09green/719%09green/3426%09green/9103%09green/2215%09green/713%09green/728%09green/717%09green/6404%09green/3109%09green/3122%09green/3118%09green/3108%09green/2359%09green	21	585	55	6948	4.66644	715;2212;714;3684;2357;712;3127;5724;719;3426;9103;2215;713;728;717;6404;3109;3122;3118;3108;2359	C1R;FCGR2A;C1QC;ITGAM;FPR1;C1QA;HLA-DRB5;PTAFR;C3AR1;CFI;FCGR2C;FCGR3B;C1QB;C5AR1;C2;SELPLG;HLA-DMB;HLA-DRA;HLA-DQA2;HLA-DMA;FPR3	1.73028e-07	6.76188	6.62448e-06
path:hsa04360	Axon guidance	http://www.kegg.jp/kegg-bin/show_pathway?hsa04360/10154%09green/2773%09green/2042%09green/5880%09green/387%09green/3688%09green/1947%09green/9353%09green/5362%09green/1072%09green/10512%09green/6586%09green/219699%09green/5594%09green/1020%09green/4893%09green/80031%09green/3984%09green/6387%09green/57556%09green/25%09green/22885%09green/9037%09green/998%09green/8482%09green/5058%09green/7852%09g…	32	585	127	6948	3.10792	10154;2773;2042;5880;387;3688;1947;9353;5362;1072;10512;6586;219699;5594;1020;4893;80031;3984;6387;57556;25;22885;9037;998;8482;5058;7852;57522;8829;2770;2534;57689	PLXNC1;GNAI3;EPHA3;RAC2;RHOA;ITGB1;EFNB1;SLIT2;PLXNA2;CFL1;SEMA3C;SLIT3;UNC5B;MAPK1;CDK5;NRAS;SEMA6D;LIMK1;CXCL12;SEMA6A;ABL1;ABLIM3;SEMA5A;CDC42;SEMA7A;PAK1;CXCR4;SRGAP1;NRP1;GNAI1;FYN;LRRC4C	4.05284e-07	6.39224	1.3577e-05
path:hsa04974	Protein digestion and absorption	http://www.kegg.jp/kegg-bin/show_pathway?hsa04974/1303%09green/1291%09green/1284%09green/1803%09green/1282%09green/1277%09green/1305%09green/1293%09green/81578%09green/4311%09green/5547%09green/3783%09green/1306%09green/255631%09green/483%09green/1289%09green/9056%09green/206358%09green/7373%09green/1278%09green/1292%09green/1297%09green/1280%09green/1359%09green/6547%09green/6546%09green	26	585	90	6948	3.54419	1303;1291;1284;1803;1282;1277;1305;1293;81578;4311;5547;3783;1306;255631;483;1289;9056;206358;7373;1278;1292;1297;1280;1359;6547;6546	COL12A1;COL6A1;COL4A2;DPP4;COL4A1;COL1A1;COL13A1;COL6A3;COL21A1;MME;PRCP;KCNN4;COL15A1;COL24A1;ATP1B3;COL5A1;SLC7A7;SLC36A1;COL14A1;COL1A2;COL6A2;COL9A1;COL2A1;CPA3;SLC8A3;SLC8A1	5.79945e-07	6.23661	1.72695e-05
path:hsa04380	Osteoclast differentiation	http://www.kegg.jp/kegg-bin/show_pathway?hsa04380/4689%09green/7132%09green/2212%09green/3455%09green/2885%09green/6688%09green/54209%09green/7046%09green/2353%09green/3553%09green/3690%09green/10990%09green/8600%09green/5594%09green/6773%09green/3725%09green/1513%09green/1436%09green/3937%09green/9103%09green/2215%09green/3554%09green/4790%09green/1435%09green/5294%09green/1536%09green/3459%09gr…	32	585	131	6948	3.01125	4689;7132;2212;3455;2885;6688;54209;7046;2353;3553;3690;10990;8600;5594;6773;3725;1513;1436;3937;9103;2215;3554;4790;1435;5294;1536;3459;3460;7305;10288;2534;2354	NCF4;TNFRSF1A;FCGR2A;IFNAR2;GRB2;SPI1;TREM2;TGFBR1;FOS;IL1B;ITGB3;LILRB5;TNFSF11;MAPK1;STAT2;JUN;CTSK;CSF1R;LCP2;FCGR2C;FCGR3B;IL1R1;NFKB1;CSF1;PIK3CG;CYBB;IFNGR1;IFNGR2;TYROBP;LILRB2;FYN;FOSB	7.27836e-07	6.13797	1.9506e-05
path:hsa05152	Tuberculosis	http://www.kegg.jp/kegg-bin/show_pathway?hsa05152/4615%09green/7132%09green/2212%09green/3684%09green/2207%09green/9902%09green/387%09green/23545%09green/3656%09green/6714%09green/972%09green/3553%09green/3127%09green/817%09green/7099%09green/5594%09green/5993%09green/3920%09green/9114%09green/1520%09green/9103%09green/2215%09green/3587%09green/4790%09green/3569%09green/3109%09green/581%09green/6…	38	585	177	6948	2.65752	4615;7132;2212;3684;2207;9902;387;23545;3656;6714;972;3553;3127;817;7099;5594;5993;3920;9114;1520;9103;2215;3587;4790;3569;3109;581;637;3122;7421;3118;533;4360;3459;3460;3606;3108;10312	MYD88;TNFRSF1A;FCGR2A;ITGAM;FCER1G;MRC2;RHOA;ATP6V0A2;IRAK2;SRC;CD74;IL1B;HLA-DRB5;CAMK2D;TLR4;MAPK1;RFX5;LAMP2;ATP6V0D1;CTSS;FCGR2C;FCGR3B;IL10RA;NFKB1;IL6;HLA-DMB;BAX;BID;HLA-DRA;VDR;HLA-DQA2;ATP6V0B;MRC1;IFNGR1;IFNGR2;IL18;HLA-DMA;TCIRG1	1.0818e-06	5.96585	2.63566e-05
path:hsa04810	Regulation of actin cytoskeleton	http://www.kegg.jp/kegg-bin/show_pathway?hsa04810/5216%09green/9459%09green/7430%09green/3684%09green/3693%09green/2252%09green/4628%09green/10627%09green/5880%09green/387%09green/3688%09green/22801%09green/6714%09green/1072%09green/7454%09green/10092%09green/3690%09green/55740%09green/4627%09green/5594%09green/87%09green/2256%09green/81624%09green/5159%09green/4893%09green/3984%09green/3679%09gr…	42	585	214	6948	2.43393	5216;9459;7430;3684;3693;2252;4628;10627;5880;387;3688;22801;6714;1072;7454;10092;3690;55740;4627;5594;87;2256;81624;5159;4893;3984;3679;623;5501;10398;5294;89846;2255;998;56034;3685;10788;3071;5058;7114;7414;10672	PFN1;ARHGEF6;EZR;ITGAM;ITGB5;FGF7;MYH10;MYL12A;RAC2;RHOA;ITGB1;ITGA11;SRC;CFL1;WAS;ARPC5;ITGB3;ENAH;MYH9;MAPK1;ACTN1;FGF11;DIAPH3;PDGFRB;NRAS;LIMK1;ITGA7;BDKRB1;PPP1CC;MYL9;PIK3CG;FGD3;FGF10;CDC42;PDGFC;ITGAV;IQGAP2;NCKAP1L;PAK1;TMSB4X;VCL;GNA13	2.25503e-06	5.64685	5.03623e-05
path:hsa05132	Salmonella infection	http://www.kegg.jp/kegg-bin/show_pathway?hsa05132/4615%09green/5216%09green/7082%09green/4628%09green/2353%09green/3553%09green/7454%09green/10092%09green/58484%09green/7099%09green/4627%09green/5594%09green/2316%09green/23207%09green/3725%09green/391%09green/4790%09green/3569%09green/834%09green/998%09green/7100%09green/3459%09green/3460%09green/3606%09green	24	585	86	6948	3.41351	4615;5216;7082;4628;2353;3553;7454;10092;58484;7099;4627;5594;2316;23207;3725;391;4790;3569;834;998;7100;3459;3460;3606	MYD88;PFN1;TJP1;MYH10;FOS;IL1B;WAS;ARPC5;NLRC4;TLR4;MYH9;MAPK1;FLNA;PLEKHM2;JUN;RHOG;NFKB1;IL6;CASP1;CDC42;TLR5;IFNGR1;IFNGR2;IL18	2.62759e-06	5.58044	5.41688e-05
path:hsa05133	Pertussis	http://www.kegg.jp/kegg-bin/show_pathway?hsa05133/4615%09green/715%09green/714%09green/2773%09green/3684%09green/387%09green/3688%09green/23643%09green/712%09green/2353%09green/3553%09green/1072%09green/7099%09green/5594%09green/3725%09green/713%09green/717%09green/4790%09green/3569%09green/834%09green/2770%09green/114548%09green	22	585	75	6948	3.58096	4615;715;714;2773;3684;387;3688;23643;712;2353;3553;1072;7099;5594;3725;713;717;4790;3569;834;2770;114548	MYD88;C1R;C1QC;GNAI3;ITGAM;RHOA;ITGB1;LY96;C1QA;FOS;IL1B;CFL1;TLR4;MAPK1;JUN;C1QB;C2;NFKB1;IL6;CASP1;GNAI1;NLRP3	3.4882e-06	5.4574	6.67741e-05
path:hsa05142	Chagas disease (American trypanosomiasis)	http://www.kegg.jp/kegg-bin/show_pathway?hsa05142/4615%09green/7132%09green/714%09green/2773%09green/2775%09green/2776%09green/712%09green/7046%09green/2353%09green/3553%09green/7099%09green/5594%09green/3725%09green/1636%09green/5054%09green/355%09green/713%09green/4790%09green/3569%09green/6352%09green/5294%09green/3459%09green/3460%09green/6347%09green/2770%09green/5330%09green	26	585	104	6948	3.06082	4615;7132;714;2773;2775;2776;712;7046;2353;3553;7099;5594;3725;1636;5054;355;713;4790;3569;6352;5294;3459;3460;6347;2770;5330	MYD88;TNFRSF1A;C1QC;GNAI3;GNAO1;GNAQ;C1QA;TGFBR1;FOS;IL1B;TLR4;MAPK1;JUN;ACE;SERPINE1;FAS;C1QB;NFKB1;IL6;CCL5;PIK3CG;IFNGR1;IFNGR2;CCL2;GNAI1;PLCB2	5.63527e-06	5.24909	0.000100683
path:hsa05130	Pathogenic Escherichia coli infection	http://www.kegg.jp/kegg-bin/show_pathway?hsa05130/1499%09green/7430%09green/387%09green/3688%09green/23643%09green/203068%09green/7454%09green/10092%09green/7099%09green/100506658%09green/84790%09green/25%09green/9076%09green/998%09green/7846%09green/7100%09green/7280%09green/2534%09green	18	585	55	6948	3.97864	1499;7430;387;3688;23643;203068;7454;10092;7099;100506658;84790;25;9076;998;7846;7100;7280;2534	CTNNB1;EZR;RHOA;ITGB1;LY96;TUBB;WAS;ARPC5;TLR4;OCLN;TUBA1C;ABL1;CLDN1;CDC42;TUBA1A;TLR5;TUBB2A;FYN	7.80395e-06	5.10769	0.000126622
path:hsa04514	Cell adhesion molecules (CAMs)	http://www.kegg.jp/kegg-bin/show_pathway?hsa04514/90952%09green/3684%09green/965%09green/1002%09green/9019%09green/3688%09green/942%09green/5175%09green/23114%09green/3127%09green/1462%09green/947%09green/1003%09green/100506658%09green/1000%09green/80380%09green/4685%09green/6404%09green/9369%09green/9076%09green/3109%09green/3122%09green/3118%09green/3685%09green/23705%09green/5788%09green/58494…	31	585	142	6948	2.68198	90952;3684;965;1002;9019;3688;942;5175;23114;3127;1462;947;1003;100506658;1000;80380;4685;6404;9369;9076;3109;3122;3118;3685;23705;5788;58494;3108;4684;57689;940	ESAM;ITGAM;CD58;CDH4;MPZL1;ITGB1;CD86;PECAM1;NFASC;HLA-DRB5;VCAN;CD34;CDH5;OCLN;CDH2;PDCD1LG2;NCAM2;SELPLG;NRXN3;CLDN1;HLA-DMB;HLA-DRA;HLA-DQA2;ITGAV;CADM1;PTPRC;JAM2;HLA-DMA;NCAM1;LRRC4C;CD28	8.03198e-06	5.09518	0.000126622
path:hsa04670	Leukocyte transendothelial migration	http://www.kegg.jp/kegg-bin/show_pathway?hsa04670/4689%09green/90952%09green/1499%09green/7430%09green/2773%09green/3684%09green/10627%09green/5880%09green/387%09green/3688%09green/5175%09green/1003%09green/100506658%09green/87%09green/4313%09green/7070%09green/6387%09green/10398%09green/9076%09green/5294%09green/4318%09green/1536%09green/998%09green/7414%09green/7852%09green/58494%09green/2770%0…	27	585	118	6948	2.80071	4689;90952;1499;7430;2773;3684;10627;5880;387;3688;5175;1003;100506658;87;4313;7070;6387;10398;9076;5294;4318;1536;998;7414;7852;58494;2770	NCF4;ESAM;CTNNB1;EZR;GNAI3;ITGAM;MYL12A;RAC2;RHOA;ITGB1;PECAM1;CDH5;OCLN;ACTN1;MMP2;THY1;CXCL12;MYL9;CLDN1;PIK3CG;MMP9;CYBB;CDC42;VCL;CXCR4;JAM2;GNAI1	1.49974e-05	4.82398	0.000223294
path:hsa05140	Leishmaniasis	http://www.kegg.jp/kegg-bin/show_pathway?hsa05140/4689%09green/4615%09green/2212%09green/3684%09green/3688%09green/2353%09green/3553%09green/3127%09green/7099%09green/5594%09green/3725%09green/9103%09green/2215%09green/4790%09green/3109%09green/3122%09green/3118%09green/3459%09green/3460%09green/3108%09green	20	585	72	6948	3.38053	4689;4615;2212;3684;3688;2353;3553;3127;7099;5594;3725;9103;2215;4790;3109;3122;3118;3459;3460;3108	NCF4;MYD88;FCGR2A;ITGAM;ITGB1;FOS;IL1B;HLA-DRB5;TLR4;MAPK1;JUN;FCGR2C;FCGR3B;NFKB1;HLA-DMB;HLA-DRA;HLA-DQA2;IFNGR1;IFNGR2;HLA-DMA	1.89219e-05	4.72304	0.000266898
path:hsa04015	Rap1 signaling pathway	http://www.kegg.jp/kegg-bin/show_pathway?hsa04015/5216%09green/285%09green/1499%09green/3791%09green/2773%09green/3684%09green/7424%09green/2775%09green/2252%09green/5880%09green/2357%09green/387%09green/3688%09green/2776%09green/6714%09green/3690%09green/5898%09green/5594%09green/2256%09green/5159%09green/25780%09green/4893%09green/1436%09green/3937%09green/54518%09green/3479%09green/9732%09gree…	38	585	211	6948	2.2181	5216;285;1499;3791;2773;3684;7424;2775;2252;5880;2357;387;3688;2776;6714;3690;5898;5594;2256;5159;25780;4893;1436;3937;54518;3479;9732;113;1435;5294;2255;5228;998;56034;7423;284;2770;5330	PFN1;ANGPT2;CTNNB1;KDR;GNAI3;ITGAM;VEGFC;GNAO1;FGF7;RAC2;FPR1;RHOA;ITGB1;GNAQ;SRC;ITGB3;RALA;MAPK1;FGF11;PDGFRB;RASGRP3;NRAS;CSF1R;LCP2;APBB1IP;IGF1;DOCK4;ADCY7;CSF1;PIK3CG;FGF10;PGF;CDC42;PDGFC;VEGFB;ANGPT1;GNAI1;PLCB2	3.75689e-05	4.42517	0.000503423
path:hsa05205	Proteoglycans in cancer	http://www.kegg.jp/kegg-bin/show_pathway?hsa05205/1499%09green/3091%09green/7430%09green/3791%09green/3339%09green/3693%09green/867%09green/2885%09green/387%09green/3688%09green/6714%09green/81578%09green/817%09green/1026%09green/4609%09green/3690%09green/7099%09green/7291%09green/5594%09green/2316%09green/4313%09green/4893%09green/355%09green/3479%09green/81029%09green/5501%09green/5328%09green/…	37	585	204	6948	2.23207	1499;3091;7430;3791;3339;3693;867;2885;387;3688;6714;81578;817;1026;4609;3690;7099;7291;5594;2316;4313;4893;355;3479;81029;5501;5328;8321;5294;4318;595;5329;998;3685;960;8324;5058	CTNNB1;HIF1A;EZR;KDR;HSPG2;ITGB5;CBL;GRB2;RHOA;ITGB1;SRC;COL21A1;CAMK2D;CDKN1A;MYC;ITGB3;TLR4;TWIST1;MAPK1;FLNA;MMP2;NRAS;FAS;IGF1;WNT5B;PPP1CC;PLAU;FZD1;PIK3CG;MMP9;CCND1;PLAUR;CDC42;ITGAV;CD44;FZD7;PAK1	4.16444e-05	4.38044	0.000531462
path:hsa04071	Sphingolipid signaling pathway	http://www.kegg.jp/kegg-bin/show_pathway?hsa04071/7132%09green/2773%09green/2207%09green/5880%09green/166929%09green/387%09green/2776%09green/9517%09green/5594%09green/4893%09green/259230%09green/2205%09green/1903%09green/4790%09green/5294%09green/581%09green/4363%09green/637%09green/253782%09green/427%09green/5728%09green/10672%09green/2770%09green/2534%09green/1901%09green/5330%09green	26	585	120	6948	2.64651	7132;2773;2207;5880;166929;387;2776;9517;5594;4893;259230;2205;1903;4790;5294;581;4363;637;253782;427;5728;10672;2770;2534;1901;5330	TNFRSF1A;GNAI3;FCER1G;RAC2;SGMS2;RHOA;GNAQ;SPTLC2;MAPK1;NRAS;SGMS1;FCER1A;S1PR3;NFKB1;PIK3CG;BAX;ABCC1;BID;CERS6;ASAH1;PTEN;GNA13;GNAI1;FYN;S1PR1;PLCB2	4.80868e-05	4.31797	0.000585785
path:hsa04611	Platelet activation	http://www.kegg.jp/kegg-bin/show_pathway?hsa04611/2212%09green/2773%09green/1277%09green/2207%09green/10627%09green/387%09green/3688%09green/2776%09green/6714%09green/3690%09green/5594%09green/255631%09green/1289%09green/5321%09green/3937%09green/54518%09green/6916%09green/5501%09green/113%09green/1278%09green/5294%09green/2983%09green/1280%09green/10672%09green/2770%09green/2534%09green/5330%09g…	27	585	131	6948	2.51798	2212;2773;1277;2207;10627;387;3688;2776;6714;3690;5594;255631;1289;5321;3937;54518;6916;5501;113;1278;5294;2983;1280;10672;2770;2534;5330	FCGR2A;GNAI3;COL1A1;FCER1G;MYL12A;RHOA;ITGB1;GNAQ;SRC;ITGB3;MAPK1;COL24A1;COL5A1;PLA2G4A;LCP2;APBB1IP;TBXAS1;PPP1CC;ADCY7;COL1A2;PIK3CG;GUCY1B3;COL2A1;GNA13;GNAI1;FYN;PLCB2	7.27669e-05	4.13807	0.000847892
path:hsa05416	Viral myocarditis	http://www.kegg.jp/kegg-bin/show_pathway?hsa05416/5880%09green/942%09green/3127%09green/27%09green/1756%09green/25%09green/3109%09green/595%09green/637%09green/3122%09green/3118%09green/6444%09green/3108%09green/6443%09green/2534%09green/940%09green	16	585	58	6948	3.3404	5880;942;3127;27;1756;25;3109;595;637;3122;3118;6444;3108;6443;2534;940	RAC2;CD86;HLA-DRB5;ABL2;DMD;ABL1;HLA-DMB;CCND1;BID;HLA-DRA;HLA-DQA2;SGCD;HLA-DMA;SGCB;FYN;CD28	0.000136937	3.86348	0.00152913
path:hsa04640	Hematopoietic cell lineage	http://www.kegg.jp/kegg-bin/show_pathway?hsa04640/948%09green/3684%09green/3566%09green/1438%09green/3553%09green/3127%09green/4311%09green/947%09green/3690%09green/951%09green/1436%09green/290%09green/3554%09green/3569%09green/3575%09green/1435%09green/3122%09green/960%09green/911%09green/3563%09green	20	585	87	6948	2.79158	948;3684;3566;1438;3553;3127;4311;947;3690;951;1436;290;3554;3569;3575;1435;3122;960;911;3563	CD36;ITGAM;IL4R;CSF2RA;IL1B;HLA-DRB5;MME;CD34;ITGB3;CD37;CSF1R;ANPEP;IL1R1;IL6;IL7R;CSF1;HLA-DRA;CD44;CD1C;IL3RA	0.000179599	3.7457	0.0019253
path:hsa05145	Toxoplasmosis	http://www.kegg.jp/kegg-bin/show_pathway?hsa05145/4615%09green/330%09green/7132%09green/2773%09green/2775%09green/3688%09green/23643%09green/3915%09green/3127%09green/7099%09green/5594%09green/284217%09green/3587%09green/4790%09green/5294%09green/3109%09green/3122%09green/3118%09green/3912%09green/3459%09green/3460%09green/3108%09green/2770%09green/3910%09green	24	585	118	6948	2.47621	4615;330;7132;2773;2775;3688;23643;3915;3127;7099;5594;284217;3587;4790;5294;3109;3122;3118;3912;3459;3460;3108;2770;3910	MYD88;BIRC3;TNFRSF1A;GNAI3;GNAO1;ITGB1;LY96;LAMC1;HLA-DRB5;TLR4;MAPK1;LAMA1;IL10RA;NFKB1;PIK3CG;HLA-DMB;HLA-DRA;HLA-DQA2;LAMB1;IFNGR1;IFNGR2;HLA-DMA;GNAI1;LAMA4	0.000215655	3.66624	0.00220992
path:hsa05020	Prion diseases	http://www.kegg.jp/kegg-bin/show_pathway?hsa05020/714%09green/712%09green/3915%09green/3553%09green/5594%09green/713%09green/4685%09green/3569%09green/6352%09green/581%09green/4684%09green/2534%09green	12	585	36	6948	4.02094	714;712;3915;3553;5594;713;4685;3569;6352;581;4684;2534	C1QC;C1QA;LAMC1;IL1B;MAPK1;C1QB;NCAM2;IL6;CCL5;BAX;NCAM1;FYN	0.000222641	3.65239	0.00220992
path:hsa04060	Cytokine-cytokine receptor interaction	http://www.kegg.jp/kegg-bin/show_pathway?hsa04060/7132%09green/3791%09green/1230%09green/7424%09green/3455%09green/658%09green/3625%09green/3566%09green/58191%09green/51330%09green/1438%09green/6357%09green/7046%09green/3604%09green/3553%09green/55504%09green/8600%09green/6376%09green/10673%09green/5159%09green/1436%09green/355%09green/3587%09green/3554%09green/6387%09green/3569%09green/6352%09gr…	41	585	265	6948	1.90069	7132;3791;1230;7424;3455;658;3625;3566;58191;51330;1438;6357;7046;3604;3553;55504;8600;6376;10673;5159;1436;355;3587;3554;6387;3569;6352;3575;1435;27190;60401;56034;944;80301;7423;3459;3460;7852;3563;6347;3606	TNFRSF1A;KDR;CCR1;VEGFC;IFNAR2;BMPR1B;INHBB;IL4R;CXCL16;TNFRSF12A;CSF2RA;CCL13;TGFBR1;TNFRSF9;IL1B;TNFRSF19;TNFSF11;CX3CL1;TNFSF13B;PDGFRB;CSF1R;FAS;IL10RA;IL1R1;CXCL12;IL6;CCL5;IL7R;CSF1;IL17B;EDA2R;PDGFC;TNFSF8;PLEKHO2;VEGFB;IFNGR1;IFNGR2;CXCR4;IL3RA;CCL2;IL18	0.000359522	3.44427	0.00340449
path:hsa04142	Lysosome	http://www.kegg.jp/kegg-bin/show_pathway?hsa04142/1522%09green/2799%09green/4668%09green/7805%09green/23545%09green/4758%09green/2548%09green/950%09green/3920%09green/968%09green/79158%09green/4125%09green/9114%09green/5476%09green/1513%09green/1520%09green/1508%09green/2760%09green/6556%09green/533%09green/427%09green/10312%09green/5641%09green/1200%09green	24	585	123	6948	2.37381	1522;2799;4668;7805;23545;4758;2548;950;3920;968;79158;4125;9114;5476;1513;1520;1508;2760;6556;533;427;10312;5641;1200	CTSZ;GNS;NAGA;LAPTM5;ATP6V0A2;NEU1;GAA;SCARB2;LAMP2;CD68;GNPTAB;MAN2B1;ATP6V0D1;CTSA;CTSK;CTSS;CTSB;GM2A;SLC11A1;ATP6V0B;ASAH1;TCIRG1;LGMN;TPP1	0.000368396	3.43368	0.00340449
path:hsa05146	Amoebiasis	http://www.kegg.jp/kegg-bin/show_pathway?hsa05146/1284%09green/3684%09green/1282%09green/1277%09green/2776%09green/3915%09green/3553%09green/7099%09green/87%09green/255631%09green/1289%09green/284217%09green/3554%09green/4790%09green/3569%09green/1278%09green/5294%09green/1280%09green/3912%09green/7414%09green/5330%09green/3910%09green	22	585	109	6948	2.45177	1284;3684;1282;1277;2776;3915;3553;7099;87;255631;1289;284217;3554;4790;3569;1278;5294;1280;3912;7414;5330;3910	COL4A2;ITGAM;COL4A1;COL1A1;GNAQ;LAMC1;IL1B;TLR4;ACTN1;COL24A1;COL5A1;LAMA1;IL1R1;NFKB1;IL6;COL1A2;PIK3CG;COL2A1;LAMB1;VCL;PLCB2;LAMA4	0.000428526	3.36802	0.00382817
path:hsa05412	Arrhythmogenic right ventricular cardiomyopathy (ARVC)	http://www.kegg.jp/kegg-bin/show_pathway?hsa05412/1499%09green/3693%09green/3688%09green/22801%09green/51176%09green/3690%09green/87%09green/1000%09green/1756%09green/2697%09green/3679%09green/775%09green/3685%09green/4000%09green/6444%09green/6546%09green/6443%09green	17	585	74	6948	2.78022	1499;3693;3688;22801;51176;3690;87;1000;1756;2697;3679;775;3685;4000;6444;6546;6443	CTNNB1;ITGB5;ITGB1;ITGA11;LEF1;ITGB3;ACTN1;CDH2;DMD;GJA1;ITGA7;CACNA1C;ITGAV;LMNA;SGCD;SLC8A1;SGCB	0.000542902	3.26528	0.00469348
path:hsa04540	Gap junction	http://www.kegg.jp/kegg-bin/show_pathway?hsa04540/2773%09green/7082%09green/2885%09green/2776%09green/203068%09green/6714%09green/5594%09green/5159%09green/4893%09green/2697%09green/84790%09green/113%09green/56034%09green/2983%09green/7846%09green/983%09green/7280%09green/2770%09green/5330%09green	19	585	89	6948	2.58707	2773;7082;2885;2776;203068;6714;5594;5159;4893;2697;84790;113;56034;2983;7846;983;7280;2770;5330	GNAI3;TJP1;GRB2;GNAQ;TUBB;SRC;MAPK1;PDGFRB;NRAS;GJA1;TUBA1C;ADCY7;PDGFC;GUCY1B3;TUBA1A;CDK1;TUBB2A;GNAI1;PLCB2	0.000575335	3.24008	0.00481843
path:hsa04115	p53 signaling pathway	http://www.kegg.jp/kegg-bin/show_pathway?hsa04115/9538%09green/50484%09green/1026%09green/4616%09green/5054%09green/355%09green/3479%09green/581%09green/595%09green/637%09green/3486%09green/1021%09green/5728%09green/898%09green/983%09green/9540%09green	16	585	68	6948	2.84503	9538;50484;1026;4616;5054;355;3479;581;595;637;3486;1021;5728;898;983;9540	EI24;RRM2B;CDKN1A;GADD45B;SERPINE1;FAS;IGF1;BAX;CCND1;BID;IGFBP3;CDK6;PTEN;CCNE1;CDK1;TP53I3	0.000627739	3.20222	0.005098
path:hsa05410	Hypertrophic cardiomyopathy (HCM)	http://www.kegg.jp/kegg-bin/show_pathway?hsa05410/3693%09green/3688%09green/22801%09green/3690%09green/1756%09green/1636%09green/3479%09green/3679%09green/3569%09green/7171%09green/775%09green/3685%09green/4000%09green/7168%09green/6444%09green/6546%09green/7170%09green/6443%09green	18	585	83	6948	2.62574	3693;3688;22801;3690;1756;1636;3479;3679;3569;7171;775;3685;4000;7168;6444;6546;7170;6443	ITGB5;ITGB1;ITGA11;ITGB3;DMD;ACE;IGF1;ITGA7;IL6;TPM4;CACNA1C;ITGAV;LMNA;TPM1;SGCD;SLC8A1;TPM3;SGCB	0.000679511	3.1678	0.00535615
path:hsa05161	Hepatitis B	http://www.kegg.jp/kegg-bin/show_pathway?hsa05161/4615%09green/3339%09green/2885%09green/6714%09green/7046%09green/2353%09green/5111%09green/1026%09green/4609%09green/7099%09green/5594%09green/6773%09green/3725%09green/4893%09green/355%09green/4790%09green/3569%09green/90993%09green/890%09green/5294%09green/4318%09green/581%09green/595%09green/1021%09green/5728%09green/898%09green	26	585	146	6948	2.16693	4615;3339;2885;6714;7046;2353;5111;1026;4609;7099;5594;6773;3725;4893;355;4790;3569;90993;890;5294;4318;581;595;1021;5728;898	MYD88;HSPG2;GRB2;SRC;TGFBR1;FOS;PCNA;CDKN1A;MYC;TLR4;MAPK1;STAT2;JUN;NRAS;FAS;NFKB1;IL6;CREB3L1;CCNA2;PIK3CG;MMP9;BAX;CCND1;CDK6;PTEN;CCNE1	0.000725521	3.13935	0.00555542
path:hsa05321	Inflammatory bowel disease (IBD)	http://www.kegg.jp/kegg-bin/show_pathway?hsa05321/3566%09green/3553%09green/3127%09green/7099%09green/3725%09green/4790%09green/3569%09green/3109%09green/3122%09green/3118%09green/7100%09green/3459%09green/3460%09green/3606%09green/3108%09green	15	585	65	6948	2.78664	3566;3553;3127;7099;3725;4790;3569;3109;3122;3118;7100;3459;3460;3606;3108	IL4R;IL1B;HLA-DRB5;TLR4;JUN;NFKB1;IL6;HLA-DMB;HLA-DRA;HLA-DQA2;TLR5;IFNGR1;IFNGR2;IL18;HLA-DMA	0.00108979	2.96266	0.00811287
path:hsa04062	Chemokine signaling pathway	http://www.kegg.jp/kegg-bin/show_pathway?hsa04062/2773%09green/1230%09green/2885%09green/409%09green/1794%09green/58191%09green/5880%09green/387%09green/6357%09green/6714%09green/54331%09green/7454%09green/2788%09green/5594%09green/6376%09green/6773%09green/2791%09green/4893%09green/9844%09green/6387%09green/4790%09green/6352%09green/113%09green/5294%09green/998%09green/5058%09green/7852%09green/…	30	585	188	6948	1.94365	2773;1230;2885;409;1794;58191;5880;387;6357;6714;54331;7454;2788;5594;6376;6773;2791;4893;9844;6387;4790;6352;113;5294;998;5058;7852;6347;2770;5330	GNAI3;CCR1;GRB2;ARRB2;DOCK2;CXCL16;RAC2;RHOA;CCL13;SRC;GNG2;WAS;GNG7;MAPK1;CX3CL1;STAT2;GNG11;NRAS;ELMO1;CXCL12;NFKB1;CCL5;ADCY7;PIK3CG;CDC42;PAK1;CXCR4;CCL2;GNAI1;PLCB2	0.00141905	2.848	0.0102785
path:hsa05120	Epithelial cell signaling in Helicobacter pylori infection	http://www.kegg.jp/kegg-bin/show_pathway?hsa05120/7082%09green/23545%09green/6714%09green/526%09green/3725%09green/5803%09green/9114%09green/523%09green/4790%09green/6352%09green/998%09green/533%09green/5058%09green/58494%09green/10312%09green	15	585	68	6948	2.66254	7082;23545;6714;526;3725;5803;9114;523;4790;6352;998;533;5058;58494;10312	TJP1;ATP6V0A2;SRC;ATP6V1B2;JUN;PTPRZ1;ATP6V0D1;ATP6V1A;NFKB1;CCL5;CDC42;ATP6V0B;PAK1;JAM2;TCIRG1	0.00160835	2.79362	0.0113431
path:hsa05332	Graft-versus-host disease	http://www.kegg.jp/kegg-bin/show_pathway?hsa05332/942%09green/3553%09green/3127%09green/355%09green/3824%09green/3569%09green/3109%09green/3122%09green/3118%09green/3108%09green/940%09green	11	585	41	6948	3.22839	942;3553;3127;355;3824;3569;3109;3122;3118;3108;940	CD86;IL1B;HLA-DRB5;FAS;KLRD1;IL6;HLA-DMB;HLA-DRA;HLA-DQA2;HLA-DMA;CD28	0.00180688	2.74307	0.0122043
path:hsa04610	Complement and coagulation cascades	http://www.kegg.jp/kegg-bin/show_pathway?hsa04610/715%09green/714%09green/712%09green/719%09green/3426%09green/5054%09green/713%09green/623%09green/728%09green/717%09green/5328%09green/5329%09green/2152%09green/5327%09green/5104%09green	15	585	69	6948	2.62357	715;714;712;719;3426;5054;713;623;728;717;5328;5329;2152;5327;5104	C1R;C1QC;C1QA;C3AR1;CFI;SERPINE1;C1QB;BDKRB1;C5AR1;C2;PLAU;PLAUR;F3;PLAT;SERPINA5	0.00182153	2.73956	0.0122043
path:hsa04666	Fc gamma R-mediated phagocytosis	http://www.kegg.jp/kegg-bin/show_pathway?hsa04666/2212%09green/4082%09green/50807%09green/1794%09green/5880%09green/1072%09green/7454%09green/10092%09green/5594%09green/5321%09green/3984%09green/4651%09green/8611%09green/5294%09green/998%09green/382%09green/5058%09green/5788%09green	18	585	92	6948	2.36577	2212;4082;50807;1794;5880;1072;7454;10092;5594;5321;3984;4651;8611;5294;998;382;5058;5788	FCGR2A;MARCKS;ASAP1;DOCK2;RAC2;CFL1;WAS;ARPC5;MAPK1;PLA2G4A;LIMK1;MYO10;PPAP2A;PIK3CG;CDC42;ARF6;PAK1;PTPRC	0.0018837	2.72499	0.012313
path:hsa05164	Influenza A	http://www.kegg.jp/kegg-bin/show_pathway?hsa05164/4615%09green/7132%09green/3455%09green/4939%09green/3553%09green/3127%09green/7099%09green/5594%09green/6773%09green/3725%09green/355%09green/3838%09green/3337%09green/4938%09green/4790%09green/3569%09green/6352%09green/5294%09green/3109%09green/834%09green/3122%09green/3118%09green/3459%09green/3460%09green/6347%09green/3606%09green/3108%09green/…	28	585	175	6948	1.94557	4615;7132;3455;4939;3553;3127;7099;5594;6773;3725;355;3838;3337;4938;4790;3569;6352;5294;3109;834;3122;3118;3459;3460;6347;3606;3108;114548	MYD88;TNFRSF1A;IFNAR2;OAS2;IL1B;HLA-DRB5;TLR4;MAPK1;STAT2;JUN;FAS;KPNA2;DNAJB1;OAS1;NFKB1;IL6;CCL5;PIK3CG;HLA-DMB;CASP1;HLA-DRA;HLA-DQA2;IFNGR1;IFNGR2;CCL2;IL18;HLA-DMA;NLRP3	0.0019528	2.70934	0.0124607
path:hsa04614	Renin-angiotensin system	http://www.kegg.jp/kegg-bin/show_pathway?hsa04614/10159%09green/4311%09green/5547%09green/1636%09green/5476%09green/185%09green/290%09green/1359%09green	8	585	23	6948	4.17452	10159;4311;5547;1636;5476;185;290;1359	ATP6AP2;MME;PRCP;ACE;CTSA;AGTR1;ANPEP;CPA3	0.00200069	2.69882	0.0124694
path:hsa05222	Small cell lung cancer	http://www.kegg.jp/kegg-bin/show_pathway?hsa05222/330%09green/1284%09green/1164%09green/1282%09green/3688%09green/3915%09green/4609%09green/284217%09green/4790%09green/5294%09green/595%09green/1021%09green/3685%09green/3912%09green/5728%09green/898%09green/3910%09green	17	585	86	6948	2.3881	330;1284;1164;1282;3688;3915;4609;284217;4790;5294;595;1021;3685;3912;5728;898;3910	BIRC3;COL4A2;CKS2;COL4A1;ITGB1;LAMC1;MYC;LAMA1;NFKB1;PIK3CG;CCND1;CDK6;ITGAV;LAMB1;PTEN;CCNE1;LAMA4	0.00226739	2.64447	0.0138105
path:hsa04621	NOD-like receptor signaling pathway	http://www.kegg.jp/kegg-bin/show_pathway?hsa04621/4671%09green/330%09green/3553%09green/58484%09green/5594%09green/7128%09green/4790%09green/3569%09green/6352%09green/834%09green/6347%09green/3606%09green/114548%09green	13	585	57	6948	2.74761	4671;330;3553;58484;5594;7128;4790;3569;6352;834;6347;3606;114548	NAIP;BIRC3;IL1B;NLRC4;MAPK1;TNFAIP3;NFKB1;IL6;CCL5;CASP1;CCL2;IL18;NLRP3	0.00251134	2.60009	0.0149564
path:hsa04520	Adherens junction	http://www.kegg.jp/kegg-bin/show_pathway?hsa04520/1499%09green/7082%09green/5880%09green/387%09green/6714%09green/7046%09green/7454%09green/51176%09green/5594%09green/87%09green/998%09green/5787%09green/7414%09green/4008%09green/2534%09green	15	585	73	6948	2.47837	1499;7082;5880;387;6714;7046;7454;51176;5594;87;998;5787;7414;4008;2534	CTNNB1;TJP1;RAC2;RHOA;SRC;TGFBR1;WAS;LEF1;MAPK1;ACTN1;CDC42;PTPRB;VCL;LMO7;FYN	0.00292407	2.53401	0.0170359
path:hsa04014	Ras signaling pathway	http://www.kegg.jp/kegg-bin/show_pathway?hsa04014/285%09green/3791%09green/7424%09green/2252%09green/2885%09green/5880%09green/387%09green/54331%09green/27%09green/2788%09green/9462%09green/5898%09green/5594%09green/2256%09green/2791%09green/5159%09green/25780%09green/4893%09green/5321%09green/1436%09green/3479%09green/25%09green/4790%09green/1435%09green/5294%09green/2255%09green/5228%09green/99…	33	585	227	6948	1.77004	285;3791;7424;2252;2885;5880;387;54331;27;2788;9462;5898;5594;2256;2791;5159;25780;4893;5321;1436;3479;25;4790;1435;5294;2255;5228;998;382;56034;7423;284;5058	ANGPT2;KDR;VEGFC;FGF7;GRB2;RAC2;RHOA;GNG2;ABL2;GNG7;RASAL2;RALA;MAPK1;FGF11;GNG11;PDGFRB;RASGRP3;NRAS;PLA2G4A;CSF1R;IGF1;ABL1;NFKB1;CSF1;PIK3CG;FGF10;PGF;CDC42;ARF6;PDGFC;VEGFB;ANGPT1;PAK1	0.00324619	2.48863	0.0185102
path:hsa05414	Dilated cardiomyopathy	http://www.kegg.jp/kegg-bin/show_pathway?hsa05414/3693%09green/3688%09green/22801%09green/3690%09green/1756%09green/3479%09green/3679%09green/113%09green/7171%09green/775%09green/3685%09green/4000%09green/7168%09green/6444%09green/6546%09green/7170%09green/6443%09green	17	585	90	6948	2.28063	3693;3688;22801;3690;1756;3479;3679;113;7171;775;3685;4000;7168;6444;6546;7170;6443	ITGB5;ITGB1;ITGA11;ITGB3;DMD;IGF1;ITGA7;ADCY7;TPM4;CACNA1C;ITGAV;LMNA;TPM1;SGCD;SLC8A1;TPM3;SGCB	0.00342588	2.46523	0.0191278
path:hsa04921	Oxytocin signaling pathway	http://www.kegg.jp/kegg-bin/show_pathway?hsa04921/4637%09green/2773%09green/2775%09green/3759%09green/3762%09green/387%09green/2776%09green/6714%09green/2353%09green/817%09green/1026%09green/5594%09green/3725%09green/4893%09green/5321%09green/5501%09green/10398%09green/113%09green/5294%09green/5997%09green/595%09green/775%09green/2983%09green/2770%09green/5330%09green	25	585	159	6948	1.90617	4637;2773;2775;3759;3762;387;2776;6714;2353;817;1026;5594;3725;4893;5321;5501;10398;113;5294;5997;595;775;2983;2770;5330	MYL6;GNAI3;GNAO1;KCNJ2;KCNJ5;RHOA;GNAQ;SRC;FOS;CAMK2D;CDKN1A;MAPK1;JUN;NRAS;PLA2G4A;PPP1CC;MYL9;ADCY7;PIK3CG;RGS2;CCND1;CACNA1C;GUCY1B3;GNAI1;PLCB2	0.004079	2.38945	0.0223096
path:hsa04672	Intestinal immune network for IgA production	http://www.kegg.jp/kegg-bin/show_pathway?hsa04672/942%09green/3127%09green/10673%09green/6387%09green/3569%09green/3109%09green/3122%09green/3118%09green/7852%09green/3108%09green/940%09green	11	585	47	6948	2.81381	942;3127;10673;6387;3569;3109;3122;3118;7852;3108;940	CD86;HLA-DRB5;TNFSF13B;CXCL12;IL6;HLA-DMB;HLA-DRA;HLA-DQA2;CXCR4;HLA-DMA;CD28	0.00445523	2.35113	0.02388
path:hsa04668	TNF signaling pathway	http://www.kegg.jp/kegg-bin/show_pathway?hsa04668/4323%09green/330%09green/7132%09green/7424%09green/2353%09green/3553%09green/5594%09green/6376%09green/3725%09green/355%09green/7128%09green/4790%09green/3569%09green/6352%09green/90993%09green/1435%09green/5294%09green/4318%09green/6347%09green	19	585	110	6948	2.08677	4323;330;7132;7424;2353;3553;5594;6376;3725;355;7128;4790;3569;6352;90993;1435;5294;4318;6347	MMP14;BIRC3;TNFRSF1A;VEGFC;FOS;IL1B;MAPK1;CX3CL1;JUN;FAS;TNFAIP3;NFKB1;IL6;CCL5;CREB3L1;CSF1;PIK3CG;MMP9;CCL2	0.00484801	2.31444	0.0253949
path:hsa05134	Legionellosis	http://www.kegg.jp/kegg-bin/show_pathway?hsa05134/4615%09green/4671%09green/3684%09green/3553%09green/58484%09green/56681%09green/7099%09green/4790%09green/3569%09green/834%09green/7100%09green/3606%09green	12	585	55	6948	2.62465	4615;4671;3684;3553;58484;56681;7099;4790;3569;834;7100;3606	MYD88;NAIP;ITGAM;IL1B;NLRC4;SAR1A;TLR4;NFKB1;IL6;CASP1;TLR5;IL18	0.00493528	2.30669	0.0253949
path:hsa05100	Bacterial invasion of epithelial cells	http://www.kegg.jp/kegg-bin/show_pathway?hsa05100/1499%09green/867%09green/387%09green/3688%09green/6714%09green/7454%09green/10092%09green/9844%09green/391%09green/5294%09green/998%09green/55752%09green/1759%09green/7414%09green/3611%09green	15	585	78	6948	2.31781	1499;867;387;3688;6714;7454;10092;9844;391;5294;998;55752;1759;7414;3611	CTNNB1;CBL;RHOA;ITGB1;SRC;WAS;ARPC5;ELMO1;RHOG;PIK3CG;CDC42;SEPT11;DNM1;VCL;ILK	0.00502212	2.29911	0.0253949
path:hsa04066	HIF-1 signaling pathway	http://www.kegg.jp/kegg-bin/show_pathway?hsa04066/285%09green/3091%09green/3162%09green/817%09green/1026%09green/7099%09green/5594%09green/5054%09green/3479%09green/3939%09green/4790%09green/3569%09green/5294%09green/1536%09green/5211%09green/284%09green/3459%09green/3460%09green	18	585	103	6948	2.10972	285;3091;3162;817;1026;7099;5594;5054;3479;3939;4790;3569;5294;1536;5211;284;3459;3460	ANGPT2;HIF1A;HMOX1;CAMK2D;CDKN1A;TLR4;MAPK1;SERPINE1;IGF1;LDHA;NFKB1;IL6;PIK3CG;CYBB;PFKL;ANGPT1;IFNGR1;IFNGR2	0.00542011	2.26599	0.0268998
path:hsa05131	Shigellosis	http://www.kegg.jp/kegg-bin/show_pathway?hsa05131/5216%09green/3688%09green/6714%09green/7454%09green/10092%09green/5594%09green/9844%09green/391%09green/25%09green/4790%09green/998%09green/960%09green/7414%09green	13	585	65	6948	2.40664	5216;3688;6714;7454;10092;5594;9844;391;25;4790;998;960;7414	PFN1;ITGB1;SRC;WAS;ARPC5;MAPK1;ELMO1;RHOG;ABL1;NFKB1;CDC42;CD44;VCL	0.00659001	2.18111	0.0315379
path:hsa04924	Renin secretion	http://www.kegg.jp/kegg-bin/show_pathway?hsa04924/2773%09green/3759%09green/2776%09green/1636%09green/185%09green/1508%09green/5732%09green/775%09green/2983%09green/5139%09green/2770%09green/1909%09green/5330%09green	13	585	65	6948	2.40664	2773;3759;2776;1636;185;1508;5732;775;2983;5139;2770;1909;5330	GNAI3;KCNJ2;GNAQ;ACE;AGTR1;CTSB;PTGER2;CACNA1C;GUCY1B3;PDE3A;GNAI1;EDNRA;PLCB2	0.00659001	2.18111	0.0315379
path:hsa05230	Central carbon metabolism in cancer	http://www.kegg.jp/kegg-bin/show_pathway?hsa05230/57103%09green/3091%09green/4609%09green/5594%09green/5159%09green/4893%09green/3939%09green/5294%09green/8140%09green/5211%09green/4916%09green/5728%09green/9997%09green	13	585	67	6948	2.33412	57103;3091;4609;5594;5159;4893;3939;5294;8140;5211;4916;5728;9997	TIGAR;HIF1A;MYC;MAPK1;PDGFRB;NRAS;LDHA;PIK3CG;SLC7A5;PFKL;NTRK3;PTEN;SCO2	0.00816904	2.08783	0.0384088
path:hsa05322	Systemic lupus erythematosus	http://www.kegg.jp/kegg-bin/show_pathway?hsa05322/3014%09green/715%09green/2212%09green/714%09green/8331%09green/712%09green/942%09green/3127%09green/8340%09green/87%09green/8345%09green/2215%09green/713%09green/717%09green/3109%09green/3122%09green/3118%09green/8342%09green/3108%09green/94239%09green/940%09green	21	585	134	6948	1.89338	3014;715;2212;714;8331;712;942;3127;8340;87;8345;2215;713;717;3109;3122;3118;8342;3108;94239;940	H2AFX;C1R;FCGR2A;C1QC;HIST1H2AJ;C1QA;CD86;HLA-DRB5;HIST1H2BL;ACTN1;HIST1H2BH;FCGR3B;C1QB;C2;HLA-DMB;HLA-DRA;HLA-DQA2;HIST1H2BM;HLA-DMA;H2AFV;CD28	0.00836441	2.07756	0.0386494
path:hsa04915	Estrogen signaling pathway	http://www.kegg.jp/kegg-bin/show_pathway?hsa04915/2773%09green/2775%09green/2885%09green/3762%09green/2776%09green/6714%09green/2353%09green/5594%09green/3725%09green/4313%09green/4893%09green/113%09green/90993%09green/5294%09green/4318%09green/2770%09green/5330%09green	17	585	100	6948	2.04958	2773;2775;2885;3762;2776;6714;2353;5594;3725;4313;4893;113;90993;5294;4318;2770;5330	GNAI3;GNAO1;GRB2;KCNJ5;GNAQ;SRC;FOS;MAPK1;JUN;MMP2;NRAS;ADCY7;CREB3L1;PIK3CG;MMP9;GNAI1;PLCB2	0.0085634	2.06735	0.0388982
path:hsa05231	Choline metabolism in cancer	http://www.kegg.jp/kegg-bin/show_pathway?hsa05231/3091%09green/2885%09green/5880%09green/2353%09green/7454%09green/5594%09green/3725%09green/5159%09green/4893%09green/5321%09green/23446%09green/204962%09green/1606%09green/8611%09green/5294%09green/56034%09green/56261%09green	17	585	101	6948	2.02899	3091;2885;5880;2353;7454;5594;3725;5159;4893;5321;23446;204962;1606;8611;5294;56034;56261	HIF1A;GRB2;RAC2;FOS;WAS;MAPK1;JUN;PDGFRB;NRAS;PLA2G4A;SLC44A1;SLC44A5;DGKA;PPAP2A;PIK3CG;PDGFC;GPCPD1	0.00930822	2.03113	0.0415767
path:hsa04010	MAPK signaling pathway	http://www.kegg.jp/kegg-bin/show_pathway?hsa04010/7132%09green/2252%09green/2885%09green/409%09green/5880%09green/1845%09green/7046%09green/2353%09green/3553%09green/4609%09green/5594%09green/4616%09green/2316%09green/2256%09green/3725%09green/5159%09green/25780%09green/11221%09green/4893%09green/5321%09green/1847%09green/994%09green/355%09green/7786%09green/1843%09green/1848%09green/3554%09green…	34	585	256	6948	1.61303	7132;2252;2885;409;5880;1845;7046;2353;3553;4609;5594;4616;2316;2256;3725;5159;25780;11221;4893;5321;1847;994;355;7786;1843;1848;3554;4790;2255;998;1846;775;5058;9448	TNFRSF1A;FGF7;GRB2;ARRB2;RAC2;DUSP3;TGFBR1;FOS;IL1B;MYC;MAPK1;GADD45B;FLNA;FGF11;JUN;PDGFRB;RASGRP3;DUSP10;NRAS;PLA2G4A;DUSP5;CDC25B;FAS;MAP3K12;DUSP1;DUSP6;IL1R1;NFKB1;FGF10;CDC42;DUSP4;CACNA1C;PAK1;MAP4K4	0.00971616	2.01251	0.0426874
path:hsa05210	Colorectal cancer	http://www.kegg.jp/kegg-bin/show_pathway?hsa05210/1499%09green/5880%09green/387%09green/7046%09green/2353%09green/51176%09green/4609%09green/5594%09green/3725%09green/5294%09green/581%09green/595%09green	12	585	62	6948	2.32596	1499;5880;387;7046;2353;51176;4609;5594;3725;5294;581;595	CTNNB1;RAC2;RHOA;TGFBR1;FOS;LEF1;MYC;MAPK1;JUN;PIK3CG;BAX;CCND1	0.0110029	1.95849	0.0475607
path:hsa04725	Cholinergic synapse	http://www.kegg.jp/kegg-bin/show_pathway?hsa04725/2773%09green/2775%09green/3759%09green/2776%09green/2353%09green/54331%09green/817%09green/2788%09green/5594%09green/2791%09green/4893%09green/113%09green/90993%09green/5294%09green/775%09green/2770%09green/2534%09green/5330%09green	18	585	112	6948	1.93764	2773;2775;3759;2776;2353;54331;817;2788;5594;2791;4893;113;90993;5294;775;2770;2534;5330	GNAI3;GNAO1;KCNJ2;GNAQ;FOS;GNG2;CAMK2D;GNG7;MAPK1;GNG11;NRAS;ADCY7;CREB3L1;PIK3CG;CACNA1C;GNAI1;FYN;PLCB2	0.011319	1.94619	0.0481507
path:hsa04270	Vascular smooth muscle contraction	http://www.kegg.jp/kegg-bin/show_pathway?hsa04270/59%09green/4637%09green/387%09green/2776%09green/5594%09green/5321%09green/185%09green/800%09green/10268%09green/5501%09green/10398%09green/113%09green/775%09green/2983%09green/10203%09green/4629%09green/10672%09green/1909%09green/5330%09green	19	585	121	6948	1.89401	59;4637;387;2776;5594;5321;185;800;10268;5501;10398;113;775;2983;10203;4629;10672;1909;5330	ACTA2;MYL6;RHOA;GNAQ;MAPK1;PLA2G4A;AGTR1;CALD1;RAMP3;PPP1CC;MYL9;ADCY7;CACNA1C;GUCY1B3;CALCRL;MYH11;GNA13;EDNRA;PLCB2	0.0115833	1.93617	0.048505
path:hsa05218	Melanoma	http://www.kegg.jp/kegg-bin/show_pathway?hsa05218/2252%09green/1026%09green/5594%09green/2256%09green/5159%09green/4893%09green/3479%09green/5294%09green/595%09green/2255%09green/1021%09green/56034%09green/5728%09green	13	585	71	6948	2.20134	2252;1026;5594;2256;5159;4893;3479;5294;595;2255;1021;56034;5728	FGF7;CDKN1A;MAPK1;FGF11;PDGFRB;NRAS;IGF1;PIK3CG;CCND1;FGF10;CDK6;PDGFC;PTEN	0.0122105	1.91327	0.0503449
path:hsa05219	Bladder cancer	http://www.kegg.jp/kegg-bin/show_pathway?hsa05219/6714%09green/1026%09green/4609%09green/5594%09green/4313%09green/4893%09green/1612%09green/4318%09green/595%09green	9	585	41	6948	2.63224	6714;1026;4609;5594;4313;4893;1612;4318;595	SRC;CDKN1A;MYC;MAPK1;MMP2;NRAS;DAPK1;MMP9;CCND1	0.0136306	1.86548	0.0553485
path:hsa05215	Prostate cancer	http://www.kegg.jp/kegg-bin/show_pathway?hsa05215/1499%09green/2885%09green/51176%09green/1026%09green/5594%09green/5159%09green/4893%09green/3479%09green/4790%09green/90993%09green/5294%09green/595%09green/56034%09green/5728%09green/898%09green	15	585	89	6948	2.02809	1499;2885;51176;1026;5594;5159;4893;3479;4790;90993;5294;595;56034;5728;898	CTNNB1;GRB2;LEF1;CDKN1A;MAPK1;PDGFRB;NRAS;IGF1;NFKB1;CREB3L1;PIK3CG;CCND1;PDGFC;PTEN;CCNE1	0.0139385	1.85578	0.0554633
path:hsa05143	African trypanosomiasis	http://www.kegg.jp/kegg-bin/show_pathway?hsa05143/4615%09green/2776%09green/3553%09green/355%09green/3569%09green/3606%09green/5330%09green/3910%09green	8	585	34	6948	2.81945	4615;2776;3553;355;3569;3606;5330;3910	MYD88;GNAQ;IL1B;FAS;IL6;IL18;PLCB2;LAMA4	0.0140728	1.85162	0.0554633
path:hsa05144	Malaria	http://www.kegg.jp/kegg-bin/show_pathway?hsa05144/4615%09green/948%09green/5175%09green/3553%09green/7099%09green/7058%09green/3569%09green/7059%09green/6347%09green/3606%09green	10	585	49	6948	2.44862	4615;948;5175;3553;7099;7058;3569;7059;6347;3606	MYD88;CD36;PECAM1;IL1B;TLR4;THBS2;IL6;THBS3;CCL2;IL18	0.0144651	1.83968	0.0561833
path:hsa04068	FoxO signaling pathway	http://www.kegg.jp/kegg-bin/show_pathway?hsa04068/2885%09green/114907%09green/847%09green/7046%09green/1026%09green/5594%09green/4616%09green/4893%09green/5347%09green/3479%09green/3569%09green/3575%09green/5294%09green/595%09green/6446%09green/5728%09green/10018%09green/10769%09green/9456%09green/1901%09green	20	585	134	6948	1.80003	2885;114907;847;7046;1026;5594;4616;4893;5347;3479;3569;3575;5294;595;6446;5728;10018;10769;9456;1901	GRB2;FBXO32;CAT;TGFBR1;CDKN1A;MAPK1;GADD45B;NRAS;PLK1;IGF1;IL6;IL7R;PIK3CG;CCND1;SGK1;PTEN;BCL2L11;PLK2;HOMER1;S1PR1	0.0154373	1.81143	0.0591027
path:hsa04064	NF-kappa B signaling pathway	http://www.kegg.jp/kegg-bin/show_pathway?hsa04064/4615%09green/330%09green/7132%09green/23643%09green/6357%09green/3553%09green/7099%09green/8600%09green/4616%09green/10673%09green/3554%09green/6387%09green/5328%09green/7128%09green/4790%09green	15	585	91	6948	1.98294	4615;330;7132;23643;6357;3553;7099;8600;4616;10673;3554;6387;5328;7128;4790	MYD88;BIRC3;TNFRSF1A;LY96;CCL13;IL1B;TLR4;TNFSF11;GADD45B;TNFSF13B;IL1R1;CXCL12;PLAU;TNFAIP3;NFKB1	0.0164202	1.78462	0.0619805
path:hsa04940	Type I diabetes mellitus	http://www.kegg.jp/kegg-bin/show_pathway?hsa04940/942%09green/3553%09green/3127%09green/355%09green/3109%09green/3122%09green/3118%09green/3108%09green/940%09green	9	585	43	6948	2.50908	942;3553;3127;355;3109;3122;3118;3108;940	CD86;IL1B;HLA-DRB5;FAS;HLA-DMB;HLA-DRA;HLA-DQA2;HLA-DMA;CD28	0.0174417	1.75841	0.0649217
path:hsa05216	Thyroid cancer	http://www.kegg.jp/kegg-bin/show_pathway?hsa05216/1499%09green/51176%09green/4609%09green/5594%09green/4893%09green/595%09green/7170%09green	7	585	29	6948	2.88945	1499;51176;4609;5594;4893;595;7170	CTNNB1;LEF1;MYC;MAPK1;NRAS;CCND1;TPM3	0.0189304	1.72284	0.0694978
path:hsa05213	Endometrial cancer	http://www.kegg.jp/kegg-bin/show_pathway?hsa05213/1499%09green/2885%09green/51176%09green/4609%09green/5594%09green/4893%09green/5294%09green/595%09green/5728%09green/3611%09green	10	585	52	6948	2.30635	1499;2885;51176;4609;5594;4893;5294;595;5728;3611	CTNNB1;GRB2;LEF1;MYC;MAPK1;NRAS;PIK3CG;CCND1;PTEN;ILK	0.0201026	1.69675	0.0718745
path:hsa04730	Long-term depression	http://www.kegg.jp/kegg-bin/show_pathway?hsa04730/2773%09green/2775%09green/2776%09green/5594%09green/4893%09green/5321%09green/3479%09green/2983%09green/10672%09green/2770%09green/5330%09green	11	585	60	6948	2.2	2773;2775;2776;5594;4893;5321;3479;2983;10672;2770;5330	GNAI3;GNAO1;GNAQ;MAPK1;NRAS;PLA2G4A;IGF1;GUCY1B3;GNA13;GNAI1;PLCB2	0.0201141	1.6965	0.0718745
path:hsa05330	Allograft rejection	http://www.kegg.jp/kegg-bin/show_pathway?hsa05330/942%09green/3127%09green/355%09green/3109%09green/3122%09green/3118%09green/3108%09green/940%09green	8	585	37	6948	2.58972	942;3127;355;3109;3122;3118;3108;940	CD86;HLA-DRB5;FAS;HLA-DMB;HLA-DRA;HLA-DQA2;HLA-DMA;CD28	0.0209578	1.67865	0.0739039
path:hsa05310	Asthma	http://www.kegg.jp/kegg-bin/show_pathway?hsa05310/2207%09green/3127%09green/2205%09green/3109%09green/3122%09green/3118%09green/3108%09green	7	585	30	6948	2.79273	2207;3127;2205;3109;3122;3118;3108	FCER1G;HLA-DRB5;FCER1A;HLA-DMB;HLA-DRA;HLA-DQA2;HLA-DMA	0.0218357	1.66083	0.0759996
path:hsa04713	Circadian entrainment	http://www.kegg.jp/kegg-bin/show_pathway?hsa04713/2773%09green/2775%09green/3762%09green/2776%09green/2353%09green/54331%09green/817%09green/2788%09green/5594%09green/2791%09green/113%09green/775%09green/2983%09green/2770%09green/5330%09green	15	585	96	6948	1.87829	2773;2775;3762;2776;2353;54331;817;2788;5594;2791;113;775;2983;2770;5330	GNAI3;GNAO1;KCNJ5;GNAQ;FOS;GNG2;CAMK2D;GNG7;MAPK1;GNG11;ADCY7;CACNA1C;GUCY1B3;GNAI1;PLCB2	0.0241069	1.61786	0.082829
path:hsa04620	Toll-like receptor signaling pathway	http://www.kegg.jp/kegg-bin/show_pathway?hsa04620/4615%09green/3455%09green/23643%09green/942%09green/2353%09green/3553%09green/7099%09green/5594%09green/3725%09green/1513%09green/4790%09green/3569%09green/6352%09green/5294%09green/7100%09green/51311%09green	16	585	106	6948	1.81503	4615;3455;23643;942;2353;3553;7099;5594;3725;1513;4790;3569;6352;5294;7100;51311	MYD88;IFNAR2;LY96;CD86;FOS;IL1B;TLR4;MAPK1;JUN;CTSK;NFKB1;IL6;CCL5;PIK3CG;TLR5;TLR8	0.0261393	1.58271	0.0886751
path:hsa00600	Sphingolipid metabolism	http://www.kegg.jp/kegg-bin/show_pathway?hsa00600/166929%09green/4758%09green/9517%09green/259230%09green/8611%09green/55512%09green/253782%09green/427%09green/55331%09green	9	585	47	6948	2.29422	166929;4758;9517;259230;8611;55512;253782;427;55331	SGMS2;NEU1;SPTLC2;SGMS1;PPAP2A;SMPD3;CERS6;ASAH1;ACER3	0.027299	1.56385	0.0906983
path:hsa05162	Measles	http://www.kegg.jp/kegg-bin/show_pathway?hsa05162/4615%09green/3455%09green/4939%09green/3553%09green/7099%09green/6773%09green/355%09green/4938%09green/7128%09green/4790%09green/3569%09green/5294%09green/595%09green/1021%09green/898%09green/3459%09green/3460%09green/2534%09green/940%09green	19	585	134	6948	1.707	4615;3455;4939;3553;7099;6773;355;4938;7128;4790;3569;5294;595;1021;898;3459;3460;2534;940	MYD88;IFNAR2;OAS2;IL1B;TLR4;STAT2;FAS;OAS1;TNFAIP3;NFKB1;IL6;PIK3CG;CCND1;CDK6;CCNE1;IFNGR1;IFNGR2;FYN;CD28	0.0274125	1.56205	0.0906983
path:hsa05220	Chronic myeloid leukemia	http://www.kegg.jp/kegg-bin/show_pathway?hsa05220/867%09green/2885%09green/7046%09green/1026%09green/4609%09green/5594%09green/4893%09green/25%09green/4790%09green/5294%09green/595%09green/1021%09green	12	585	73	6948	1.97232	867;2885;7046;1026;4609;5594;4893;25;4790;5294;595;1021	CBL;GRB2;TGFBR1;CDKN1A;MYC;MAPK1;NRAS;ABL1;NFKB1;PIK3CG;CCND1;CDK6	0.0304476	1.51645	0.0995118
path:hsa05214	Glioma	http://www.kegg.jp/kegg-bin/show_pathway?hsa05214/2885%09green/817%09green/1026%09green/5594%09green/5159%09green/4893%09green/3479%09green/5294%09green/595%09green/1021%09green/5728%09green	11	585	65	6948	2.0293	2885;817;1026;5594;5159;4893;3479;5294;595;1021;5728	GRB2;CAMK2D;CDKN1A;MAPK1;PDGFRB;NRAS;IGF1;PIK3CG;CCND1;CDK6;PTEN	0.0317611	1.4981	0.101937
path:hsa05168	Herpes simplex infection	http://www.kegg.jp/kegg-bin/show_pathway?hsa05168/4615%09green/7132%09green/3455%09green/4939%09green/972%09green/2353%09green/3553%09green/3127%09green/6773%09green/3725%09green/355%09green/5501%09green/4938%09green/4790%09green/3569%09green/6352%09green/3109%09green/3122%09green/3118%09green/983%09green/3459%09green/3460%09green/6347%09green/3108%09green	24	585	184	6948	1.57266	4615;7132;3455;4939;972;2353;3553;3127;6773;3725;355;5501;4938;4790;3569;6352;3109;3122;3118;983;3459;3460;6347;3108	MYD88;TNFRSF1A;IFNAR2;OAS2;CD74;FOS;IL1B;HLA-DRB5;STAT2;JUN;FAS;PPP1CC;OAS1;NFKB1;IL6;CCL5;HLA-DMB;HLA-DRA;HLA-DQA2;CDK1;IFNGR1;IFNGR2;CCL2;HLA-DMA	0.0319503	1.49552	0.101937
path:hsa04912	GnRH signaling pathway	http://www.kegg.jp/kegg-bin/show_pathway?hsa04912/4323%09green/2885%09green/2776%09green/6714%09green/817%09green/5594%09green/3725%09green/4313%09green/4893%09green/5321%09green/113%09green/998%09green/775%09green/5330%09green	14	585	92	6948	1.82715	4323;2885;2776;6714;817;5594;3725;4313;4893;5321;113;998;775;5330	MMP14;GRB2;GNAQ;SRC;CAMK2D;MAPK1;JUN;MMP2;NRAS;PLA2G4A;ADCY7;CDC42;CACNA1C;PLCB2	0.0341315	1.46684	0.106631
path:hsa04916	Melanogenesis	http://www.kegg.jp/kegg-bin/show_pathway?hsa04916/1499%09green/2773%09green/2775%09green/2776%09green/51176%09green/817%09green/5594%09green/4893%09green/81029%09green/8321%09green/113%09green/90993%09green/8324%09green/2770%09green/5330%09green	15	585	101	6948	1.784	1499;2773;2775;2776;51176;817;5594;4893;81029;8321;113;90993;8324;2770;5330	CTNNB1;GNAI3;GNAO1;GNAQ;LEF1;CAMK2D;MAPK1;NRAS;WNT5B;FZD1;ADCY7;CREB3L1;FZD7;GNAI1;PLCB2	0.0342175	1.46575	0.106631
path:hsa04530	Tight junction	http://www.kegg.jp/kegg-bin/show_pathway?hsa04530/1499%09green/2773%09green/7082%09green/4628%09green/10627%09green/387%09green/6714%09green/4627%09green/100506658%09green/87%09green/4893%09green/10398%09green/9076%09green/998%09green/4629%09green/5872%09green/5728%09green/58494%09green/2770%09green	19	585	138	6948	1.65655	1499;2773;7082;4628;10627;387;6714;4627;100506658;87;4893;10398;9076;998;4629;5872;5728;58494;2770	CTNNB1;GNAI3;TJP1;MYH10;MYL12A;RHOA;SRC;MYH9;OCLN;ACTN1;NRAS;MYL9;CLDN1;CDC42;MYH11;RAB13;PTEN;JAM2;GNAI1	0.0346218	1.46065	0.106651
path:hsa04971	Gastric acid secretion	http://www.kegg.jp/kegg-bin/show_pathway?hsa04971/7430%09green/2773%09green/3759%09green/2776%09green/3274%09green/817%09green/3772%09green/483%09green/3776%09green/113%09green/2770%09green/5330%09green	12	585	75	6948	1.91916	7430;2773;3759;2776;3274;817;3772;483;3776;113;2770;5330	EZR;GNAI3;KCNJ2;GNAQ;HRH2;CAMK2D;KCNJ15;ATP1B3;KCNK2;ADCY7;GNAI1;PLCB2	0.0356916	1.44743	0.107494
path:hsa04022	cGMP-PKG signaling pathway	http://www.kegg.jp/kegg-bin/show_pathway?hsa04022/2773%09green/387%09green/2776%09green/5594%09green/483%09green/185%09green/5501%09green/10398%09green/113%09green/90993%09green/5294%09green/5997%09green/8654%09green/775%09green/2983%09green/6547%09green/10672%09green/5139%09green/6546%09green/2770%09green/1909%09green/5330%09green	22	585	167	6948	1.58669	2773;387;2776;5594;483;185;5501;10398;113;90993;5294;5997;8654;775;2983;6547;10672;5139;6546;2770;1909;5330	GNAI3;RHOA;GNAQ;MAPK1;ATP1B3;AGTR1;PPP1CC;MYL9;ADCY7;CREB3L1;PIK3CG;RGS2;PDE5A;CACNA1C;GUCY1B3;SLC8A3;GNA13;PDE3A;SLC8A1;GNAI1;EDNRA;PLCB2	0.0356978	1.44736	0.107494
path:hsa04612	Antigen processing and presentation	http://www.kegg.jp/kegg-bin/show_pathway?hsa04612/972%09green/3127%09green/5993%09green/1520%09green/1508%09green/3824%09green/3109%09green/3122%09green/3118%09green/10437%09green/3108%09green/5641%09green	12	585	77	6948	1.86877	972;3127;5993;1520;1508;3824;3109;3122;3118;10437;3108;5641	CD74;HLA-DRB5;RFX5;CTSS;CTSB;KLRD1;HLA-DMB;HLA-DRA;HLA-DQA2;IFI30;HLA-DMA;LGMN	0.0415462	1.38147	0.122071
path:hsa04660	T cell receptor signaling pathway	http://www.kegg.jp/kegg-bin/show_pathway?hsa04660/867%09green/2885%09green/387%09green/2353%09green/5594%09green/3725%09green/4893%09green/3937%09green/4790%09green/5294%09green/998%09green/5058%09green/5788%09green/2534%09green/940%09green	15	585	104	6948	1.73178	867;2885;387;2353;5594;3725;4893;3937;4790;5294;998;5058;5788;2534;940	CBL;GRB2;RHOA;FOS;MAPK1;JUN;NRAS;LCP2;NFKB1;PIK3CG;CDC42;PAK1;PTPRC;FYN;CD28	0.0415973	1.38093	0.122071
path:hsa04210	Apoptosis	http://www.kegg.jp/kegg-bin/show_pathway?hsa04210/4615%09green/330%09green/7132%09green/3656%09green/3553%09green/824%09green/355%09green/3554%09green/4790%09green/5294%09green/581%09green/637%09green/3563%09green	13	585	86	6948	1.81342	4615;330;7132;3656;3553;824;355;3554;4790;5294;581;637;3563	MYD88;BIRC3;TNFRSF1A;IRAK2;IL1B;CAPN2;FAS;IL1R1;NFKB1;PIK3CG;BAX;BID;IL3RA	0.041905	1.37773	0.122071
path:hsa04012	ErbB signaling pathway	http://www.kegg.jp/kegg-bin/show_pathway?hsa04012/867%09green/2885%09green/6714%09green/817%09green/27%09green/1026%09green/4609%09green/5594%09green/3725%09green/4893%09green/25%09green/5294%09green/5058%09green	13	585	87	6948	1.79232	867;2885;6714;817;27;1026;4609;5594;3725;4893;25;5294;5058	CBL;GRB2;SRC;CAMK2D;ABL2;CDKN1A;MYC;MAPK1;JUN;NRAS;ABL1;PIK3CG;PAK1	0.0449068	1.34769	0.12929
path:hsa04110	Cell cycle	http://www.kegg.jp/kegg-bin/show_pathway?hsa04110/5111%09green/1026%09green/4609%09green/8555%09green/4616%09green/7027%09green/994%09green/5347%09green/9232%09green/25%09green/7533%09green/890%09green/595%09green/1021%09green/898%09green/983%09green/7272%09green	17	585	124	6948	1.64709	5111;1026;4609;8555;4616;7027;994;5347;9232;25;7533;890;595;1021;898;983;7272	PCNA;CDKN1A;MYC;CDC14B;GADD45B;TFDP1;CDC25B;PLK1;PTTG1;ABL1;YWHAH;CCNA2;CCND1;CDK6;CCNE1;CDK1;TTK	0.0453478	1.34344	0.12929
path:hsa04727	GABAergic synapse	http://www.kegg.jp/kegg-bin/show_pathway?hsa04727/2773%09green/2775%09green/66008%09green/6714%09green/54331%09green/2788%09green/2791%09green/5334%09green/92745%09green/113%09green/2561%09green/775%09green/2770%09green	13	585	89	6948	1.75153	2773;2775;66008;6714;54331;2788;2791;5334;92745;113;2561;775;2770	GNAI3;GNAO1;TRAK2;SRC;GNG2;GNG7;GNG11;PLCL1;SLC38A5;ADCY7;GABRB2;CACNA1C;GNAI1	0.0513537	1.28943	0.143868
path:hsa04350	TGF-beta signaling pathway	http://www.kegg.jp/kegg-bin/show_pathway?hsa04350/658%09green/3625%09green/387%09green/7046%09green/4609%09green/5594%09green/656%09green/7027%09green/353500%09green/4086%09green/4052%09green/3399%09green	12	585	80	6948	1.79791	658;3625;387;7046;4609;5594;656;7027;353500;4086;4052;3399	BMPR1B;INHBB;RHOA;TGFBR1;MYC;MAPK1;BMP8B;TFDP1;BMP8A;SMAD1;LTBP1;ID3	0.0515349	1.2879	0.143868
path:hsa04750	Inflammatory mediator regulation of TRP channels	http://www.kegg.jp/kegg-bin/show_pathway?hsa04750/2776%09green/6714%09green/3553%09green/817%09green/5321%09green/3479%09green/5732%09green/3554%09green/623%09green/5501%09green/113%09green/5294%09green/51393%09green/5330%09green	14	585	99	6948	1.69623	2776;6714;3553;817;5321;3479;5732;3554;623;5501;113;5294;51393;5330	GNAQ;SRC;IL1B;CAMK2D;PLA2G4A;IGF1;PTGER2;IL1R1;BDKRB1;PPP1CC;ADCY7;PIK3CG;TRPV2;PLCB2	0.0540791	1.26697	0.149414
path:hsa05203	Viral carcinogenesis	http://www.kegg.jp/kegg-bin/show_pathway?hsa05203/55697%09green/2885%09green/387%09green/6714%09green/1026%09green/5594%09green/8340%09green/87%09green/3725%09green/9114%09green/4893%09green/8345%09green/4790%09green/7533%09green/90993%09green/890%09green/5294%09green/581%09green/595%09green/1021%09green/998%09green/3516%09green/898%09green/983%09green/8342%09green	25	585	206	6948	1.46108	55697;2885;387;6714;1026;5594;8340;87;3725;9114;4893;8345;4790;7533;90993;890;5294;581;595;1021;998;3516;898;983;8342	VAC14;GRB2;RHOA;SRC;CDKN1A;MAPK1;HIST1H2BL;ACTN1;JUN;ATP6V0D1;NRAS;HIST1H2BH;NFKB1;YWHAH;CREB3L1;CCNA2;PIK3CG;BAX;CCND1;CDK6;CDC42;RBPJ;CCNE1;CDK1;HIST1H2BM	0.0556591	1.25446	0.152211
path:hsa05166	HTLV-I infection	http://www.kegg.jp/kegg-bin/show_pathway?hsa05166/1499%09green/55697%09green/7132%09green/6688%09green/7046%09green/2353%09green/3127%09green/5111%09green/1026%09green/4609%09green/3725%09green/5159%09green/467%09green/4893%09green/3554%09green/81029%09green/9232%09green/8321%09green/4790%09green/3569%09green/113%09green/5294%09green/3109%09green/581%09green/595%09green/3122%09green/3118%09green/…	30	585	259	6948	1.39601	1499;55697;7132;6688;7046;2353;3127;5111;1026;4609;3725;5159;467;4893;3554;81029;9232;8321;4790;3569;113;5294;3109;581;595;3122;3118;8324;8829;3108	CTNNB1;VAC14;TNFRSF1A;SPI1;TGFBR1;FOS;HLA-DRB5;PCNA;CDKN1A;MYC;JUN;PDGFRB;ATF3;NRAS;IL1R1;WNT5B;PTTG1;FZD1;NFKB1;IL6;ADCY7;PIK3CG;HLA-DMB;BAX;CCND1;HLA-DRA;HLA-DQA2;FZD7;NRP1;HLA-DMA	0.0612037	1.21322	0.165683
path:hsa04723	Retrograde endocannabinoid signaling	http://www.kegg.jp/kegg-bin/show_pathway?hsa04723/2773%09green/2775%09green/3762%09green/2776%09green/54331%09green/2788%09green/5594%09green/2791%09green/57406%09green/113%09green/2561%09green/775%09green/2770%09green/5330%09green	14	585	102	6948	1.64562	2773;2775;3762;2776;54331;2788;5594;2791;57406;113;2561;775;2770;5330	GNAI3;GNAO1;KCNJ5;GNAQ;GNG2;GNG7;MAPK1;GNG11;ABHD6;ADCY7;GABRB2;CACNA1C;GNAI1;PLCB2	0.064679	1.18924	0.17334
path:hsa04961	Endocrine and other factor-regulated calcium reabsorption	http://www.kegg.jp/kegg-bin/show_pathway?hsa04961/2776%09green/161%09green/483%09green/5745%09green/7421%09green/1759%09green/6546%09green/5330%09green	8	585	48	6948	1.99307	2776;161;483;5745;7421;1759;6546;5330	GNAQ;AP2A2;ATP1B3;PTH1R;VDR;DNM1;SLC8A1;PLCB2	0.0658655	1.18134	0.174772
path:hsa05221	Acute myeloid leukemia	http://www.kegg.jp/kegg-bin/show_pathway?hsa05221/2885%09green/6688%09green/51176%09green/4609%09green/5594%09green/4893%09green/4790%09green/5294%09green/595%09green	9	585	57	6948	1.88898	2885;6688;51176;4609;5594;4893;4790;5294;595	GRB2;SPI1;LEF1;MYC;MAPK1;NRAS;NFKB1;PIK3CG;CCND1	0.0675904	1.17011	0.177395
path:hsa05212	Pancreatic cancer	http://www.kegg.jp/kegg-bin/show_pathway?hsa05212/9459%09green/5880%09green/7046%09green/5898%09green/5594%09green/4790%09green/5294%09green/595%09green/1021%09green/998%09green	10	585	66	6948	1.81344	9459;5880;7046;5898;5594;4790;5294;595;1021;998	ARHGEF6;RAC2;TGFBR1;RALA;MAPK1;NFKB1;PIK3CG;CCND1;CDK6;CDC42	0.0681778	1.16636	0.177395
path:hsa04726	Serotonergic synapse	http://www.kegg.jp/kegg-bin/show_pathway?hsa04726/2773%09green/2775%09green/3762%09green/2776%09green/54331%09green/2788%09green/5594%09green/2791%09green/4893%09green/5321%09green/1843%09green/2561%09green/775%09green/2770%09green/5330%09green	15	585	113	6948	1.59176	2773;2775;3762;2776;54331;2788;5594;2791;4893;5321;1843;2561;775;2770;5330	GNAI3;GNAO1;KCNJ5;GNAQ;GNG2;GNG7;MAPK1;GNG11;NRAS;PLA2G4A;DUSP1;GABRB2;CACNA1C;GNAI1;PLCB2	0.0703876	1.1525	0.181383
path:hsa00120	Primary bile acid biosynthesis	http://www.kegg.jp/kegg-bin/show_pathway?hsa00120/8309%09green/9420%09green/9023%09green/80270%09green	4	585	17	6948	2.80693	8309;9420;9023;80270	ACOX2;CYP7B1;CH25H;HSD3B7	0.0748577	1.12576	0.191065
path:hsa04650	Natural killer cell mediated cytotoxicity	http://www.kegg.jp/kegg-bin/show_pathway?hsa04650/3455%09green/2885%09green/2207%09green/5880%09green/5594%09green/4893%09green/3937%09green/355%09green/2215%09green/3824%09green/5294%09green/637%09green/5058%09green/3459%09green/3460%09green/7305%09green/2534%09green	17	585	134	6948	1.52194	3455;2885;2207;5880;5594;4893;3937;355;2215;3824;5294;637;5058;3459;3460;7305;2534	IFNAR2;GRB2;FCER1G;RAC2;MAPK1;NRAS;LCP2;FAS;FCGR3B;KLRD1;PIK3CG;BID;PAK1;IFNGR1;IFNGR2;TYROBP;FYN	0.0765551	1.11603	0.193554
path:hsa05030	Cocaine addiction	http://www.kegg.jp/kegg-bin/show_pathway?hsa05030/1742%09green/2773%09green/3725%09green/1020%09green/4790%09green/90993%09green/2770%09green/2354%09green	8	585	50	6948	1.91279	1742;2773;3725;1020;4790;90993;2770;2354	DLG4;GNAI3;JUN;CDK5;NFKB1;CREB3L1;GNAI1;FOSB	0.077789	1.10908	0.194139
path:hsa04724	Glutamatergic synapse	http://www.kegg.jp/kegg-bin/show_pathway?hsa04724/1742%09green/2773%09green/2775%09green/2776%09green/54331%09green/2788%09green/5594%09green/6507%09green/2791%09green/5321%09green/113%09green/775%09green/2770%09green/9456%09green/5330%09green	15	585	115	6948	1.56362	1742;2773;2775;2776;54331;2788;5594;6507;2791;5321;113;775;2770;9456;5330	DLG4;GNAI3;GNAO1;GNAQ;GNG2;GNG7;MAPK1;SLC1A3;GNG11;PLA2G4A;ADCY7;CACNA1C;GNAI1;HOMER1;PLCB2	0.0782351	1.1066	0.194139
path:hsa03320	PPAR signaling pathway	http://www.kegg.jp/kegg-bin/show_pathway?hsa03320/9415%09green/948%09green/51129%09green/5360%09green/8309%09green/2170%09green/2171%09green/1622%09green/3611%09green/2180%09green	10	585	69	6948	1.73384	9415;948;51129;5360;8309;2170;2171;1622;3611;2180	FADS2;CD36;ANGPTL4;PLTP;ACOX2;FABP3;FABP5;DBI;ILK;ACSL1	0.0839048	1.07621	0.206298
path:hsa04144	Endocytosis	http://www.kegg.jp/kegg-bin/show_pathway?hsa04144/30011%09green/3791%09green/50807%09green/867%09green/409%09green/387%09green/89853%09green/2350%09green/6714%09green/7046%09green/7454%09green/10890%09green/10092%09green/161%09green/9265%09green/11031%09green/30846%09green/1436%09green/11021%09green/30845%09green/832%09green/998%09green/382%09green/7456%09green/23327%09green/58533%09green/1759%09…	29	585	258	6948	1.35248	30011;3791;50807;867;409;387;89853;2350;6714;7046;7454;10890;10092;161;9265;11031;30846;1436;11021;30845;832;998;382;7456;23327;58533;1759;7852;64744	SH3KBP1;KDR;ASAP1;CBL;ARRB2;RHOA;MVB12B;FOLR2;SRC;TGFBR1;WAS;RAB10;ARPC5;AP2A2;CYTH3;RAB31;EHD2;CSF1R;RAB35;EHD3;CAPZB;CDC42;ARF6;WIPF1;NEDD4L;SNX6;DNM1;CXCR4;SMAP2	0.0847702	1.07176	0.206531
path:hsa04664	Fc epsilon RI signaling pathway	http://www.kegg.jp/kegg-bin/show_pathway?hsa04664/2885%09green/2207%09green/5880%09green/5594%09green/4893%09green/5321%09green/3937%09green/2205%09green/5294%09green/2534%09green	10	585	70	6948	1.70882	2885;2207;5880;5594;4893;5321;3937;2205;5294;2534	GRB2;FCER1G;RAC2;MAPK1;NRAS;PLA2G4A;LCP2;FCER1A;PIK3CG;FYN	0.0896006	1.04769	0.216333
path:hsa05320	Autoimmune thyroid disease	http://www.kegg.jp/kegg-bin/show_pathway?hsa05320/942%09green/3127%09green/355%09green/3109%09green/3122%09green/3118%09green/3108%09green/940%09green	8	585	52	6948	1.83869	942;3127;355;3109;3122;3118;3108;940	CD86;HLA-DRB5;FAS;HLA-DMB;HLA-DRA;HLA-DQA2;HLA-DMA;CD28	0.0909213	1.04133	0.217562
path:hsa05202	Transcriptional misregulation in cancer	http://www.kegg.jp/kegg-bin/show_pathway?hsa05202/860%09green/6495%09green/2530%09green/330%09green/3684%09green/942%09green/6688%09green/1026%09green/4609%09green/8013%09green/1436%09green/3479%09green/1848%09green/4086%09green/5328%09green/4790%09green/3569%09green/55589%09green/4318%09green/3486%09green/5327%09green	21	585	179	6948	1.40803	860;6495;2530;330;3684;942;6688;1026;4609;8013;1436;3479;1848;4086;5328;4790;3569;55589;4318;3486;5327	RUNX2;SIX1;FUT8;BIRC3;ITGAM;CD86;SPI1;CDKN1A;MYC;NR4A3;CSF1R;IGF1;DUSP6;SMAD1;PLAU;NFKB1;IL6;BMP2K;MMP9;IGFBP3;PLAT	0.0953561	1.02065	0.226154
path:hsa04966	Collecting duct acid secretion	http://www.kegg.jp/kegg-bin/show_pathway?hsa04966/23545%09green/526%09green/9114%09green/523%09green/10312%09green	5	585	27	6948	2.20977	23545;526;9114;523;10312	ATP6V0A2;ATP6V1B2;ATP6V0D1;ATP6V1A;TCIRG1	0.0981336	1.00818	0.2307
path:hsa04722	Neurotrophin signaling pathway	http://www.kegg.jp/kegg-bin/show_pathway?hsa04722/397%09green/2885%09green/387%09green/3656%09green/10019%09green/817%09green/5594%09green/3725%09green/4893%09green/25%09green/4790%09green/5294%09green/581%09green/998%09green/4916%09green	15	585	120	6948	1.49737	397;2885;387;3656;10019;817;5594;3725;4893;25;4790;5294;581;998;4916	ARHGDIB;GRB2;RHOA;IRAK2;SH2B3;CAMK2D;MAPK1;JUN;NRAS;ABL1;NFKB1;PIK3CG;BAX;CDC42;NTRK3	0.100267	0.998841	0.230916
path:hsa04310	Wnt signaling pathway	http://www.kegg.jp/kegg-bin/show_pathway?hsa04310/1499%09green/5880%09green/387%09green/51176%09green/817%09green/4609%09green/2239%09green/3725%09green/6423%09green/81029%09green/8321%09green/595%09green/6422%09green/8324%09green/6424%09green/5330%09green/11197%09green	17	585	140	6948	1.45543	1499;5880;387;51176;817;4609;2239;3725;6423;81029;8321;595;6422;8324;6424;5330;11197	CTNNB1;RAC2;RHOA;LEF1;CAMK2D;MYC;GPC4;JUN;SFRP2;WNT5B;FZD1;CCND1;SFRP1;FZD7;SFRP4;PLCB2;WIF1	0.100851	0.996318	0.230916
path:hsa04917	Prolactin signaling pathway	http://www.kegg.jp/kegg-bin/show_pathway?hsa04917/2885%09green/6714%09green/2353%09green/8600%09green/5594%09green/4893%09green/4790%09green/5294%09green/595%09green/1586%09green	10	585	72	6948	1.66087	2885;6714;2353;8600;5594;4893;4790;5294;595;1586	GRB2;SRC;FOS;TNFSF11;MAPK1;NRAS;NFKB1;PIK3CG;CCND1;CYP17A1	0.101672	0.992798	0.230916
path:hsa04662	B cell receptor signaling pathway	http://www.kegg.jp/kegg-bin/show_pathway?hsa04662/118788%09green/2885%09green/5880%09green/2353%09green/5594%09green/3725%09green/25780%09green/4893%09green/4790%09green/5294%09green	10	585	72	6948	1.66087	118788;2885;5880;2353;5594;3725;25780;4893;4790;5294	PIK3AP1;GRB2;RAC2;FOS;MAPK1;JUN;RASGRP3;NRAS;NFKB1;PIK3CG	0.101672	0.992798	0.230916
path:hsa05110	Vibrio cholerae infection	http://www.kegg.jp/kegg-bin/show_pathway?hsa05110/7082%09green/23545%09green/526%09green/9114%09green/523%09green/23480%09green/533%09green/10312%09green	8	585	54	6948	1.77008	7082;23545;526;9114;523;23480;533;10312	TJP1;ATP6V0A2;ATP6V1B2;ATP6V0D1;ATP6V1A;SEC61G;ATP6V0B;TCIRG1	0.105253	0.977767	0.23704
path:hsa05032	Morphine addiction	http://www.kegg.jp/kegg-bin/show_pathway?hsa05032/2773%09green/2775%09green/409%09green/3762%09green/54331%09green/2788%09green/2791%09green/113%09green/10846%09green/2561%09green/5139%09green/2770%09green	12	585	92	6948	1.56066	2773;2775;409;3762;54331;2788;2791;113;10846;2561;5139;2770	GNAI3;GNAO1;ARRB2;KCNJ5;GNG2;GNG7;GNG11;ADCY7;PDE10A;GABRB2;PDE3A;GNAI1	0.10717	0.969926	0.239347
path:hsa04390	Hippo signaling pathway	http://www.kegg.jp/kegg-bin/show_pathway?hsa04390/1742%09green/1499%09green/55233%09green/658%09green/7046%09green/51176%09green/4609%09green/656%09green/5054%09green/353500%09green/4086%09green/81029%09green/5501%09green/8321%09green/7533%09green/595%09green/8324%09green/122786%09green	18	585	154	6948	1.40054	1742;1499;55233;658;7046;51176;4609;656;5054;353500;4086;81029;5501;8321;7533;595;8324;122786	DLG4;CTNNB1;MOB1A;BMPR1B;TGFBR1;LEF1;MYC;BMP8B;SERPINE1;BMP8A;SMAD1;WNT5B;PPP1CC;FZD1;YWHAH;CCND1;FZD7;FRMD6	0.118629	0.925809	0.262748
path:hsa04960	Aldosterone-regulated sodium reabsorption	http://www.kegg.jp/kegg-bin/show_pathway?hsa04960/5594%09green/483%09green/3479%09green/5294%09green/6446%09green/23327%09green	6	585	39	6948	1.83579	5594;483;3479;5294;6446;23327	MAPK1;ATP1B3;IGF1;PIK3CG;SGK1;NEDD4L	0.13285	0.876638	0.291835
path:hsa04261	Adrenergic signaling in cardiomyocytes	http://www.kegg.jp/kegg-bin/show_pathway?hsa04261/2773%09green/2776%09green/817%09green/5594%09green/483%09green/185%09green/5501%09green/113%09green/90993%09green/5294%09green/7171%09green/775%09green/7168%09green/6546%09green/2770%09green/7170%09green/5330%09green	17	585	149	6948	1.36571	2773;2776;817;5594;483;185;5501;113;90993;5294;7171;775;7168;6546;2770;7170;5330	GNAI3;GNAQ;CAMK2D;MAPK1;ATP1B3;AGTR1;PPP1CC;ADCY7;CREB3L1;PIK3CG;TPM4;CACNA1C;TPM1;SLC8A1;GNAI1;TPM3;PLCB2	0.145395	0.837451	0.316795
path:hsa04919	Thyroid hormone signaling pathway	http://www.kegg.jp/kegg-bin/show_pathway?hsa04919/1499%09green/3091%09green/6714%09green/4609%09green/3690%09green/5594%09green/53919%09green/483%09green/4893%09green/5294%09green/595%09green/3685%09green/6567%09green/5330%09green	14	585	119	6948	1.40703	1499;3091;6714;4609;3690;5594;53919;483;4893;5294;595;3685;6567;5330	CTNNB1;HIF1A;SRC;MYC;ITGB3;MAPK1;SLCO1C1;ATP1B3;NRAS;PIK3CG;CCND1;ITGAV;SLC16A2;PLCB2	0.149941	0.82408	0.324066
path:hsa04728	Dopaminergic synapse	http://www.kegg.jp/kegg-bin/show_pathway?hsa04728/2773%09green/2775%09green/409%09green/3762%09green/2776%09green/2353%09green/54331%09green/817%09green/2788%09green/2791%09green/5501%09green/90993%09green/775%09green/2770%09green/5330%09green	15	585	130	6948	1.38016	2773;2775;409;3762;2776;2353;54331;817;2788;2791;5501;90993;775;2770;5330	GNAI3;GNAO1;ARRB2;KCNJ5;GNAQ;FOS;GNG2;CAMK2D;GNG7;GNG11;PPP1CC;CREB3L1;CACNA1C;GNAI1;PLCB2	0.154691	0.810534	0.331658
path:hsa00533	Glycosaminoglycan biosynthesis - keratan sulfate	http://www.kegg.jp/kegg-bin/show_pathway?hsa00533/2530%09green/6483%09green/10678%09green	3	585	15	6948	2.38247	2530;6483;10678	FUT8;ST3GAL2;B3GNT2	0.159612	0.796935	0.336581
path:hsa00480	Glutathione metabolism	http://www.kegg.jp/kegg-bin/show_pathway?hsa00480/2876%09green/50484%09green/4257%09green/290%09green/51056%09green/2687%09green/3418%09green	7	585	51	6948	1.6378	2876;50484;4257;290;51056;2687;3418	GPX1;RRM2B;MGST1;ANPEP;LAP3;GGT5;IDH2	0.160755	0.793835	0.336581
path:hsa04978	Mineral absorption	http://www.kegg.jp/kegg-bin/show_pathway?hsa04978/3162%09green/483%09green/26872%09green/7421%09green/6556%09green/2495%09green/6546%09green	7	585	51	6948	1.6378	3162;483;26872;7421;6556;2495;6546	HMOX1;ATP1B3;STEAP1;VDR;SLC11A1;FTH1;SLC8A1	0.160755	0.793835	0.336581
path:hsa04370	VEGF signaling pathway	http://www.kegg.jp/kegg-bin/show_pathway?hsa04370/3791%09green/5880%09green/6714%09green/5594%09green/4893%09green/5321%09green/5294%09green/998%09green	8	585	61	6948	1.56536	3791;5880;6714;5594;4893;5321;5294;998	KDR;RAC2;SRC;MAPK1;NRAS;PLA2G4A;PIK3CG;CDC42	0.164398	0.784102	0.341541
path:hsa04721	Synaptic vesicle cycle	http://www.kegg.jp/kegg-bin/show_pathway?hsa04721/23545%09green/526%09green/161%09green/9114%09green/523%09green/533%09green/1759%09green/10312%09green	8	585	63	6948	1.51523	23545;526;161;9114;523;533;1759;10312	ATP6V0A2;ATP6V1B2;AP2A2;ATP6V0D1;ATP6V1A;ATP6V0B;DNM1;TCIRG1	0.183651	0.736007	0.378603
path:hsa05206	MicroRNAs in cancer	http://www.kegg.jp/kegg-bin/show_pathway?hsa05206/7430%09green/4082%09green/2885%09green/3162%09green/387%09green/4325%09green/1026%09green/4609%09green/3690%09green/5594%09green/5159%09green/4170%09green/4893%09green/994%09green/5328%09green/25%09green/1545%09green/4790%09green/2146%09green/4318%09green/595%09green/54541%09green/4363%09green/1021%09green/960%09green/5728%09green/7168%09green/100…	30	585	297	6948	1.21048	7430;4082;2885;3162;387;4325;1026;4609;3690;5594;5159;4170;4893;994;5328;25;1545;4790;2146;4318;595;54541;4363;1021;960;5728;7168;10018;898;3371	EZR;MARCKS;GRB2;HMOX1;RHOA;MMP16;CDKN1A;MYC;ITGB3;MAPK1;PDGFRB;MCL1;NRAS;CDC25B;PLAU;ABL1;CYP1B1;NFKB1;EZH2;MMP9;CCND1;DDIT4;ABCC1;CDK6;CD44;PTEN;TPM1;BCL2L11;CCNE1;TNC	0.190879	0.719241	0.390501
path:hsa00910	Nitrogen metabolism	http://www.kegg.jp/kegg-bin/show_pathway?hsa00910/2747%09green/2746%09green/771%09green	3	585	17	6948	2.10158	2747;2746;771	GLUD2;GLUD1;CA12	0.199549	0.699949	0.405146
path:hsa05211	Renal cell carcinoma	http://www.kegg.jp/kegg-bin/show_pathway?hsa05211/3091%09green/2885%09green/5594%09green/3725%09green/4893%09green/5294%09green/998%09green/5058%09green	8	585	66	6948	1.44572	3091;2885;5594;3725;4893;5294;998;5058	HIF1A;GRB2;MAPK1;JUN;NRAS;PIK3CG;CDC42;PAK1	0.214227	0.669126	0.429882
path:hsa05223	Non-small cell lung cancer	http://www.kegg.jp/kegg-bin/show_pathway?hsa05223/27436%09green/2885%09green/5594%09green/4893%09green/5294%09green/595%09green/1021%09green	7	585	56	6948	1.49048	27436;2885;5594;4893;5294;595;1021	EML4;GRB2;MAPK1;NRAS;PIK3CG;CCND1;CDK6	0.214941	0.667681	0.429882
path:hsa04914	Progesterone-mediated oocyte maturation	http://www.kegg.jp/kegg-bin/show_pathway?hsa04914/2773%09green/5594%09green/994%09green/5347%09green/3479%09green/113%09green/890%09green/5294%09green/983%09green/2770%09green	10	585	88	6948	1.35573	2773;5594;994;5347;3479;113;890;5294;983;2770	GNAI3;MAPK1;CDC25B;PLK1;IGF1;ADCY7;CCNA2;PIK3CG;CDK1;GNAI1	0.228477	0.641158	0.453569
path:hsa04550	Signaling pathways regulating pluripotency of stem cells	http://www.kegg.jp/kegg-bin/show_pathway?hsa04550/1499%09green/2885%09green/658%09green/3625%09green/4609%09green/5594%09green/4893%09green/6926%09green/3479%09green/4086%09green/81029%09green/8321%09green/5294%09green/8324%09green/3399%09green	15	585	142	6948	1.2613	1499;2885;658;3625;4609;5594;4893;6926;3479;4086;81029;8321;5294;8324;3399	CTNNB1;GRB2;BMPR1B;INHBB;MYC;MAPK1;NRAS;TBX3;IGF1;SMAD1;WNT5B;FZD1;PIK3CG;FZD7;ID3	0.236767	0.625679	0.46657
path:hsa04630	Jak-STAT signaling pathway	http://www.kegg.jp/kegg-bin/show_pathway?hsa04630/3455%09green/867%09green/2885%09green/3566%09green/1438%09green/4609%09green/6773%09green/3587%09green/3569%09green/3575%09green/5294%09green/595%09green/10252%09green/3459%09green/3460%09green/3563%09green	16	585	156	6948	1.22428	3455;867;2885;3566;1438;4609;6773;3587;3569;3575;5294;595;10252;3459;3460;3563	IFNAR2;CBL;GRB2;IL4R;CSF2RA;MYC;STAT2;IL10RA;IL6;IL7R;PIK3CG;CCND1;SPRY1;IFNGR1;IFNGR2;IL3RA	0.260579	0.584061	0.508008
path:hsa04024	cAMP signaling pathway	http://www.kegg.jp/kegg-bin/show_pathway?hsa04024/2773%09green/5880%09green/387%09green/2353%09green/817%09green/5594%09green/3725%09green/483%09green/5732%09green/5501%09green/4790%09green/10398%09green/113%09green/90993%09green/5294%09green/775%09green/5058%09green/5139%09green/2770%09green/1909%09green	20	585	200	6948	1.19434	2773;5880;387;2353;817;5594;3725;483;5732;5501;4790;10398;113;90993;5294;775;5058;5139;2770;1909	GNAI3;RAC2;RHOA;FOS;CAMK2D;MAPK1;JUN;ATP1B3;PTGER2;PPP1CC;NFKB1;MYL9;ADCY7;CREB3L1;PIK3CG;CACNA1C;PAK1;PDE3A;GNAI1;EDNRA	0.261586	0.582385	0.508008
path:hsa05034	Alcoholism	http://www.kegg.jp/kegg-bin/show_pathway?hsa05034/3014%09green/2773%09green/2775%09green/2885%09green/8331%09green/54331%09green/2788%09green/5594%09green/8340%09green/2791%09green/4893%09green/8345%09green/5501%09green/90993%09green/8342%09green/2770%09green/94239%09green/2354%09green	18	585	179	6948	1.2005	3014;2773;2775;2885;8331;54331;2788;5594;8340;2791;4893;8345;5501;90993;8342;2770;94239;2354	H2AFX;GNAI3;GNAO1;GRB2;HIST1H2AJ;GNG2;GNG7;MAPK1;HIST1H2BL;GNG11;NRAS;HIST1H2BH;PPP1CC;CREB3L1;HIST1H2BM;GNAI1;H2AFV;FOSB	0.268585	0.570918	0.517848
path:hsa04913	Ovarian steroidogenesis	http://www.kegg.jp/kegg-bin/show_pathway?hsa04913/5321%09green/3479%09green/1545%09green/113%09green/8644%09green/1586%09green	6	585	51	6948	1.4014	5321;3479;1545;113;8644;1586	PLA2G4A;IGF1;CYP1B1;ADCY7;AKR1C3;CYP17A1	0.280031	0.552794	0.532257
path:hsa05014	Amyotrophic lateral sclerosis (ALS)	http://www.kegg.jp/kegg-bin/show_pathway?hsa05014/7132%09green/2876%09green/847%09green/581%09green/834%09green/637%09green	6	585	51	6948	1.4014	7132;2876;847;581;834;637	TNFRSF1A;GPX1;CAT;BAX;CASP1;BID	0.280031	0.552794	0.532257
path:hsa00590	Arachidonic acid metabolism	http://www.kegg.jp/kegg-bin/show_pathway?hsa00590/2876%09green/5730%09green/5740%09green/5321%09green/6916%09green/2687%09green/8644%09green	7	585	62	6948	1.34507	2876;5730;5740;5321;6916;2687;8644	GPX1;PTGDS;PTGIS;PLA2G4A;TBXAS1;GGT5;AKR1C3	0.287158	0.541879	0.54196
path:hsa04623	Cytosolic DNA-sensing pathway	http://www.kegg.jp/kegg-bin/show_pathway?hsa04623/3553%09green/115004%09green/4790%09green/3569%09green/6352%09green/834%09green/3606%09green	7	585	64	6948	1.30266	3553;115004;4790;3569;6352;834;3606	IL1B;MB21D1;NFKB1;IL6;CCL5;CASP1;IL18	0.312439	0.505234	0.585551
path:hsa04911	Insulin secretion	http://www.kegg.jp/kegg-bin/show_pathway?hsa04911/2776%09green/817%09green/3783%09green/886%09green/483%09green/113%09green/90993%09green/775%09green/5330%09green	9	585	86	6948	1.24673	2776;817;3783;886;483;113;90993;775;5330	GNAQ;CAMK2D;KCNN4;CCKAR;ATP1B3;ADCY7;CREB3L1;CACNA1C;PLCB2	0.317088	0.49882	0.590137
path:hsa01040	Biosynthesis of unsaturated fatty acids	http://www.kegg.jp/kegg-bin/show_pathway?hsa01040/9415%09green/201562%09green/401494%09green	3	585	23	6948	1.55199	9415;201562;401494	FADS2;HACD2;HACD4	0.328536	0.483417	0.603066
path:hsa04964	Proximal tubule bicarbonate reclamation	http://www.kegg.jp/kegg-bin/show_pathway?hsa04964/483%09green/2747%09green/2746%09green	3	585	23	6948	1.55199	483;2747;2746	ATP1B3;GLUD2;GLUD1	0.328536	0.483417	0.603066
path:hsa05160	Hepatitis C	http://www.kegg.jp/kegg-bin/show_pathway?hsa05160/7132%09green/3455%09green/2885%09green/4939%09green/1026%09green/5594%09green/100506658%09green/6773%09green/4893%09green/4938%09green/4790%09green/9076%09green/5294%09green	13	585	133	6948	1.16456	7132;3455;2885;4939;1026;5594;100506658;6773;4893;4938;4790;9076;5294	TNFRSF1A;IFNAR2;GRB2;OAS2;CDKN1A;MAPK1;OCLN;STAT2;NRAS;OAS1;NFKB1;CLDN1;PIK3CG	0.34483	0.462395	0.627218
path:hsa04973	Carbohydrate digestion and absorption	http://www.kegg.jp/kegg-bin/show_pathway?hsa04973/6518%09green/483%09green/8972%09green/5294%09green/5330%09green	5	585	45	6948	1.32241	6518;483;8972;5294;5330	SLC2A5;ATP1B3;MGAM;PIK3CG;PLCB2	0.347118	0.459523	0.627218
path:hsa00534	Glycosaminoglycan biosynthesis - heparan sulfate / heparin	http://www.kegg.jp/kegg-bin/show_pathway?hsa00534/9956%09green/2131%09green/2135%09green	3	585	24	6948	1.48711	9956;2131;2135	HS3ST2;EXT1;EXTL2	0.350445	0.455381	0.627218
path:hsa04720	Long-term potentiation	http://www.kegg.jp/kegg-bin/show_pathway?hsa04720/2776%09green/817%09green/5594%09green/4893%09green/5501%09green/775%09green/5330%09green	7	585	67	6948	1.24379	2776;817;5594;4893;5501;775;5330	GNAQ;CAMK2D;MAPK1;NRAS;PPP1CC;CACNA1C;PLCB2	0.351055	0.454625	0.627218
path:hsa05010	Alzheimer's disease	http://www.kegg.jp/kegg-bin/show_pathway?hsa05010/7132%09green/23621%09green/514%09green/2776%09green/7384%09green/3553%09green/4311%09green/5594%09green/4708%09green/824%09green/1020%09green/355%09green/55967%09green/637%09green/775%09green/5330%09green	16	585	168	6948	1.13482	7132;23621;514;2776;7384;3553;4311;5594;4708;824;1020;355;55967;637;775;5330	TNFRSF1A;BACE1;ATP5E;GNAQ;UQCRC1;IL1B;MME;MAPK1;NDUFB2;CAPN2;CDK5;FAS;NDUFA12;BID;CACNA1C;PLCB2	0.355471	0.449196	0.627998
path:hsa00603	Glycosphingolipid biosynthesis - globo series	http://www.kegg.jp/kegg-bin/show_pathway?hsa00603/4668%09green/6483%09green	2	585	14	6948	1.69909	4668;6483	NAGA;ST3GAL2	0.356178	0.448333	0.627998
path:hsa05031	Amphetamine addiction	http://www.kegg.jp/kegg-bin/show_pathway?hsa05031/2353%09green/817%09green/3725%09green/5501%09green/90993%09green/775%09green/2354%09green	7	585	68	6948	1.22532	2353;817;3725;5501;90993;775;2354	FOS;CAMK2D;JUN;PPP1CC;CREB3L1;CACNA1C;FOSB	0.364049	0.438841	0.63768
path:hsa04114	Oocyte meiosis	http://www.kegg.jp/kegg-bin/show_pathway?hsa04114/817%09green/5594%09green/5347%09green/6790%09green/3479%09green/5501%09green/9232%09green/7533%09green/113%09green/898%09green/983%09green	11	585	113	6948	1.15915	817;5594;5347;6790;3479;5501;9232;7533;113;898;983	CAMK2D;MAPK1;PLK1;AURKA;IGF1;PPP1CC;PTTG1;YWHAH;ADCY7;CCNE1;CDK1	0.368278	0.433824	0.6409
path:hsa04932	Non-alcoholic fatty liver disease (NAFLD)	http://www.kegg.jp/kegg-bin/show_pathway?hsa04932/7132%09green/7384%09green/3553%09green/4708%09green/3725%09green/355%09green/4790%09green/3569%09green/5294%09green/55967%09green/581%09green/637%09green/998%09green/10018%09green	14	585	151	6948	1.10365	7132;7384;3553;4708;3725;355;4790;3569;5294;55967;581;637;998;10018	TNFRSF1A;UQCRC1;IL1B;NDUFB2;JUN;FAS;NFKB1;IL6;PIK3CG;NDUFA12;BAX;BID;CDC42;BCL2L11	0.405229	0.392299	0.699018
path:hsa04150	mTOR signaling pathway	http://www.kegg.jp/kegg-bin/show_pathway?hsa04150/3091%09green/5594%09green/3479%09green/5294%09green/54541%09green/5728%09green	6	585	60	6948	1.18964	3091;5594;3479;5294;54541;5728	HIF1A;MAPK1;IGF1;PIK3CG;DDIT4;PTEN	0.406891	0.390522	0.699018
path:hsa05169	Epstein-Barr virus infection	http://www.kegg.jp/kegg-bin/show_pathway?hsa05169/965%09green/6688%09green/3127%09green/1026%09green/953%09green/4609%09green/3725%09green/3587%09green/7128%09green/4790%09green/7533%09green/890%09green/5294%09green/3122%09green/3118%09green/3516%09green/960%09green/983%09green	18	585	201	6948	1.06562	965;6688;3127;1026;953;4609;3725;3587;7128;4790;7533;890;5294;3122;3118;3516;960;983	CD58;SPI1;HLA-DRB5;CDKN1A;ENTPD1;MYC;JUN;IL10RA;TNFAIP3;NFKB1;YWHAH;CCNA2;PIK3CG;HLA-DRA;HLA-DQA2;RBPJ;CD44;CDK1	0.436532	0.359984	0.745163
path:hsa00360	Phenylalanine metabolism	http://www.kegg.jp/kegg-bin/show_pathway?hsa00360/314%09green/221%09green	2	585	17	6948	1.39865	314;221	AOC2;ALDH3B1	0.440581	0.355974	0.747315
path:hsa04020	Calcium signaling pathway	http://www.kegg.jp/kegg-bin/show_pathway?hsa04020/5027%09green/2776%09green/3274%09green/817%09green/5724%09green/5737%09green/886%09green/5159%09green/185%09green/623%09green/113%09green/775%09green/6547%09green/6546%09green/1909%09green/5330%09green	16	585	180	6948	1.05729	5027;2776;3274;817;5724;5737;886;5159;185;623;113;775;6547;6546;1909;5330	P2RX7;GNAQ;HRH2;CAMK2D;PTAFR;PTGFR;CCKAR;PDGFRB;AGTR1;BDKRB1;ADCY7;CACNA1C;SLC8A3;SLC8A1;EDNRA;PLCB2	0.455614	0.341403	0.767954
path:hsa00511	Other glycan degradation	http://www.kegg.jp/kegg-bin/show_pathway?hsa00511/4758%09green/4125%09green	2	585	18	6948	1.32075	4758;4125	NEU1;MAN2B1	0.467362	0.330346	0.77797
path:hsa00770	Pantothenate and CoA biosynthesis	http://www.kegg.jp/kegg-bin/show_pathway?hsa00770/8876%09green/53354%09green	2	585	18	6948	1.32075	8876;53354	VNN1;PANK1	0.467362	0.330346	0.77797
path:hsa00460	Cyanoamino acid metabolism	http://www.kegg.jp/kegg-bin/show_pathway?hsa00460/2687%09green	1	585	7	6948	1.6979	2687	GGT5	0.476401	0.322027	0.786244
path:hsa00052	Galactose metabolism	http://www.kegg.jp/kegg-bin/show_pathway?hsa00052/2548%09green/8972%09green/5211%09green	3	585	30	6948	1.18866	2548;8972;5211	GAA;MGAM;PFKL	0.4782	0.32039	0.786244
path:hsa04260	Cardiac muscle contraction	http://www.kegg.jp/kegg-bin/show_pathway?hsa04260/7384%09green/483%09green/7171%09green/775%09green/7168%09green/6546%09green/7170%09green	7	585	78	6948	1.06668	7384;483;7171;775;7168;6546;7170	UQCRC1;ATP1B3;TPM4;CACNA1C;TPM1;SLC8A1;TPM3	0.49358	0.306642	0.799869
path:hsa04970	Salivary secretion	http://www.kegg.jp/kegg-bin/show_pathway?hsa04970/2776%09green/3783%09green/483%09green/113%09green/2983%09green/1471%09green/5330%09green/1470%09green	8	585	90	6948	1.0565	2776;3783;483;113;2983;1471;5330;1470	GNAQ;KCNN4;ATP1B3;ADCY7;GUCY1B3;CST3;PLCB2;CST2	0.495596	0.304873	0.799869
path:hsa00512	Mucin type O-Glycan biosynthesis	http://www.kegg.jp/kegg-bin/show_pathway?hsa00512/2589%09green/9334%09green/6483%09green	3	585	31	6948	1.15015	2589;9334;6483	GALNT1;B4GALT5;ST3GAL2	0.498426	0.3024	0.799869
path:hsa00410	beta-Alanine metabolism	http://www.kegg.jp/kegg-bin/show_pathway?hsa00410/314%09green/54498%09green/221%09green	3	585	31	6948	1.15015	314;54498;221	AOC2;SMOX;ALDH3B1	0.498426	0.3024	0.799869
path:hsa05217	Basal cell carcinoma	http://www.kegg.jp/kegg-bin/show_pathway?hsa05217/1499%09green/51176%09green/81029%09green/8321%09green/8324%09green	5	585	55	6948	1.08041	1499;51176;81029;8321;8324	CTNNB1;LEF1;WNT5B;FZD1;FZD7	0.50329	0.298182	0.802867
path:hsa02010	ABC transporters	http://www.kegg.jp/kegg-bin/show_pathway?hsa02010/8714%09green/10060%09green/4363%09green/340273%09green	4	585	44	6948	1.08027	8714;10060;4363;340273	ABCC3;ABCC9;ABCC1;ABCB5	0.518156	0.285539	0.803303
path:hsa00051	Fructose and mannose metabolism	http://www.kegg.jp/kegg-bin/show_pathway?hsa00051/57103%09green/5211%09green/7167%09green	3	585	32	6948	1.11405	57103;5211;7167	TIGAR;PFKL;TPI1	0.518247	0.285463	0.803303
path:hsa00670	One carbon pool by folate	http://www.kegg.jp/kegg-bin/show_pathway?hsa00670/160428%09green/7298%09green	2	585	20	6948	1.18834	160428;7298	ALDH1L2;TYMS	0.51855	0.285209	0.803303
path:hsa00532	Glycosaminoglycan biosynthesis - chondroitin sulfate / dermatan sulfate	http://www.kegg.jp/kegg-bin/show_pathway?hsa00532/50515%09green/22856%09green	2	585	20	6948	1.18834	50515;22856	CHST11;CHSY1	0.51855	0.285209	0.803303
path:hsa00220	Arginine biosynthesis	http://www.kegg.jp/kegg-bin/show_pathway?hsa00220/2747%09green/2746%09green	2	585	20	6948	1.18834	2747;2746	GLUD2;GLUD1	0.51855	0.285209	0.803303
path:hsa00565	Ether lipid metabolism	http://www.kegg.jp/kegg-bin/show_pathway?hsa00565/5168%09green/5321%09green/8611%09green/54947%09green	4	585	45	6948	1.05611	5168;5321;8611;54947	ENPP2;PLA2G4A;PPAP2A;LPCAT2	0.534764	0.271838	0.823659
path:hsa04972	Pancreatic secretion	http://www.kegg.jp/kegg-bin/show_pathway?hsa04972/387%09green/2776%09green/886%09green/483%09green/113%09green/5874%09green/1359%09green/5330%09green	8	585	96	6948	0.989601	387;2776;886;483;113;5874;1359;5330	RHOA;GNAQ;CCKAR;ATP1B3;ADCY7;RAB27B;CPA3;PLCB2	0.564709	0.248176	0.864811
path:hsa00190	Oxidative phosphorylation	http://www.kegg.jp/kegg-bin/show_pathway?hsa00190/514%09green/23545%09green/7384%09green/526%09green/4708%09green/64077%09green/9114%09green/523%09green/55967%09green/533%09green/10312%09green	11	585	133	6948	0.981963	514;23545;7384;526;4708;64077;9114;523;55967;533;10312	ATP5E;ATP6V0A2;UQCRC1;ATP6V1B2;NDUFB2;LHPP;ATP6V0D1;ATP6V1A;NDUFA12;ATP6V0B;TCIRG1	0.568691	0.245124	0.864812
path:hsa04918	Thyroid hormone synthesis	http://www.kegg.jp/kegg-bin/show_pathway?hsa04918/2876%09green/2776%09green/483%09green/113%09green/90993%09green/5330%09green	6	585	72	6948	0.989637	2876;2776;483;113;90993;5330	GPX1;GNAQ;ATP1B3;ADCY7;CREB3L1;PLCB2	0.571163	0.24324	0.864812
path:hsa01212	Fatty acid metabolism	http://www.kegg.jp/kegg-bin/show_pathway?hsa01212/9415%09green/201562%09green/401494%09green/2180%09green	4	585	48	6948	0.989673	9415;201562;401494;2180	FADS2;HACD2;HACD4;ACSL1	0.582782	0.234494	0.877376
path:hsa03060	Protein export	http://www.kegg.jp/kegg-bin/show_pathway?hsa03060/23480%09green/58477%09green	2	585	23	6948	1.03289	23480;58477	SEC61G;SRPRB	0.588939	0.22993	0.877376
path:hsa00920	Sulfur metabolism	http://www.kegg.jp/kegg-bin/show_pathway?hsa00920/58472%09green	1	585	10	6948	1.18801	58472	SQRDL	0.589283	0.229676	0.877376
path:hsa05340	Primary immunodeficiency	http://www.kegg.jp/kegg-bin/show_pathway?hsa05340/5993%09green/3575%09green/5788%09green	3	585	36	6948	0.989691	5993;3575;5788	RFX5;IL7R;PTPRC	0.59302	0.22693	0.878063
path:hsa00510	N-Glycan biosynthesis	http://www.kegg.jp/kegg-bin/show_pathway?hsa00510/2530%09green/1798%09green/4121%09green/79868%09green	4	585	49	6948	0.969335	2530;1798;4121;79868	FUT8;DPAGT1;MAN1A1;ALG13	0.59814	0.223197	0.880777
path:hsa04977	Vitamin digestion and absorption	http://www.kegg.jp/kegg-bin/show_pathway?hsa04977/6948%09green/4363%09green	2	585	24	6948	0.989708	6948;4363	TCN2;ABCC1	0.610639	0.214216	0.893073
path:hsa00330	Arginine and proline metabolism	http://www.kegg.jp/kegg-bin/show_pathway?hsa00330/6303%09green/51056%09green/5831%09green/54498%09green	4	585	50	6948	0.949811	6303;51056;5831;54498	SAT1;LAP3;PYCR1;SMOX	0.613154	0.21243	0.893073
path:hsa00430	Taurine and hypotaurine metabolism	http://www.kegg.jp/kegg-bin/show_pathway?hsa00430/2687%09green	1	585	11	6948	1.07986	2687	GGT5	0.621225	0.206751	0.895098
path:hsa00130	Ubiquinone and other terpenoid-quinone biosynthesis	http://www.kegg.jp/kegg-bin/show_pathway?hsa00130/27235%09green	1	585	11	6948	1.07986	27235	COQ2	0.621225	0.206751	0.895098
path:hsa00062	Fatty acid elongation	http://www.kegg.jp/kegg-bin/show_pathway?hsa00062/201562%09green/401494%09green	2	585	25	6948	0.949983	201562;401494	HACD2;HACD4	0.631454	0.199658	0.900159
path:hsa00592	alpha-Linolenic acid metabolism	http://www.kegg.jp/kegg-bin/show_pathway?hsa00592/9415%09green/5321%09green	2	585	25	6948	0.949983	9415;5321	FADS2;PLA2G4A	0.631454	0.199658	0.900159
path:hsa00380	Tryptophan metabolism	http://www.kegg.jp/kegg-bin/show_pathway?hsa00380/8564%09green/847%09green/1545%09green	3	585	40	6948	0.890206	8564;847;1545	KMO;CAT;CYP1B1	0.659855	0.180552	0.935667
path:hsa04320	Dorso-ventral axis formation	http://www.kegg.jp/kegg-bin/show_pathway?hsa04320/2885%09green/5594%09green	2	585	27	6948	0.87936	2885;5594	GRB2;MAPK1	0.670461	0.173626	0.945703
path:hsa00061	Fatty acid biosynthesis	http://www.kegg.jp/kegg-bin/show_pathway?hsa00061/2180%09green	1	585	13	6948	0.913462	2180	ACSL1	0.677861	0.168859	0.951135
path:hsa00790	Folate biosynthesis	http://www.kegg.jp/kegg-bin/show_pathway?hsa00790/249%09green	1	585	14	6948	0.848092	249	ALPL	0.702924	0.153092	0.978205
path:hsa04744	Phototransduction	http://www.kegg.jp/kegg-bin/show_pathway?hsa04744/409%09green/5957%09green	2	585	29	6948	0.818478	409;5957	ARRB2;RCVRN	0.706057	0.15116	0.978205
path:hsa04923	Regulation of lipolysis in adipocytes	http://www.kegg.jp/kegg-bin/show_pathway?hsa04923/2773%09green/113%09green/5294%09green/2770%09green	4	585	57	6948	0.832322	2773;113;5294;2770	GNAI3;ADCY7;PIK3CG;GNAI1	0.708103	0.149903	0.978205
path:hsa00562	Inositol phosphate metabolism	http://www.kegg.jp/kegg-bin/show_pathway?hsa00562/5287%09green/5294%09green/7167%09green/5728%09green/5330%09green	5	585	71	6948	0.834993	5287;5294;7167;5728;5330	PIK3C2B;PIK3CG;TPI1;PTEN;PLCB2	0.713565	0.146566	0.980695
path:hsa00140	Steroid hormone biosynthesis	http://www.kegg.jp/kegg-bin/show_pathway?hsa00140/9420%09green/1545%09green/8644%09green/1586%09green	4	585	58	6948	0.817853	9420;1545;8644;1586	CYP7B1;CYP1B1;AKR1C3;CYP17A1	0.720179	0.14256	0.984734
path:hsa00604	Glycosphingolipid biosynthesis - ganglio series	http://www.kegg.jp/kegg-bin/show_pathway?hsa00604/6483%09green	1	585	15	6948	0.791438	6483	ST3GAL2	0.726041	0.139039	0.98771
path:hsa04962	Vasopressin-regulated water reabsorption	http://www.kegg.jp/kegg-bin/show_pathway?hsa04962/397%09green/90993%09green/8655%09green	3	585	45	6948	0.790722	397;90993;8655	ARHGDIB;CREB3L1;DYNLL1	0.731739	0.135644	0.990435
path:hsa00514	Other types of O-glycan biosynthesis	http://www.kegg.jp/kegg-bin/show_pathway?hsa00514/727936%09green/79709%09green	2	585	31	6948	0.765451	727936;79709	GXYLT2;COLGALT1	0.73839	0.131714	0.994415
path:hsa01210	2-Oxocarboxylic acid metabolism	http://www.kegg.jp/kegg-bin/show_pathway?hsa01210/3418%09green	1	585	17	6948	0.698127	3418	IDH2	0.767025	0.11519	1
path:hsa04930	Type II diabetes mellitus	http://www.kegg.jp/kegg-bin/show_pathway?hsa04930/5594%09green/5294%09green/775%09green	3	585	48	6948	0.740979	5594;5294;775	MAPK1;PIK3CG;CACNA1C	0.768802	0.114185	1
path:hsa04080	Neuroactive ligand-receptor interaction	http://www.kegg.jp/kegg-bin/show_pathway?hsa04080/5027%09green/2357%09green/3274%09green/5724%09green/719%09green/5737%09green/886%09green/10161%09green/5745%09green/185%09green/5732%09green/187%09green/623%09green/728%09green/1903%09green/2561%09green/10203%09green/1909%09green/1901%09green/2359%09green	20	585	275	6948	0.858954	5027;2357;3274;5724;719;5737;886;10161;5745;185;5732;187;623;728;1903;2561;10203;1909;1901;2359	P2RX7;FPR1;HRH2;PTAFR;C3AR1;PTGFR;CCKAR;LPAR6;PTH1R;AGTR1;PTGER2;APLNR;BDKRB1;C5AR1;S1PR3;GABRB2;CALCRL;EDNRA;S1PR1;FPR3	0.771649	0.11258	1
path:hsa00250	Alanine, aspartate and glutamate metabolism	http://www.kegg.jp/kegg-bin/show_pathway?hsa00250/2747%09green/2746%09green	2	585	35	6948	0.677579	2747;2746	GLUD2;GLUD1	0.794002	0.100178	1
path:hsa00350	Tyrosine metabolism	http://www.kegg.jp/kegg-bin/show_pathway?hsa00350/314%09green/221%09green	2	585	35	6948	0.677579	314;221	AOC2;ALDH3B1	0.794002	0.100178	1
path:hsa00531	Glycosaminoglycan degradation	http://www.kegg.jp/kegg-bin/show_pathway?hsa00531/2799%09green	1	585	19	6948	0.624459	2799	GNS	0.801887	0.0958868	1
path:hsa00010	Glycolysis / Gluconeogenesis	http://www.kegg.jp/kegg-bin/show_pathway?hsa00010/3939%09green/5211%09green/7167%09green/221%09green	4	585	67	6948	0.707067	3939;5211;7167;221	LDHA;PFKL;TPI1;ALDH3B1	0.812502	0.0901756	1
path:hsa04152	AMPK signaling pathway	http://www.kegg.jp/kegg-bin/show_pathway?hsa04152/948%09green/10890%09green/3479%09green/90993%09green/890%09green/5294%09green/595%09green/5211%09green	8	585	124	6948	0.763012	948;10890;3479;90993;890;5294;595;5211	CD36;RAB10;IGF1;CREB3L1;CCNA2;PIK3CG;CCND1;PFKL	0.814784	0.0889576	1
path:hsa04146	Peroxisome	http://www.kegg.jp/kegg-bin/show_pathway?hsa04146/847%09green/8309%09green/55711%09green/3418%09green/2180%09green	5	585	83	6948	0.713025	847;8309;55711;3418;2180	CAT;ACOX2;FAR2;IDH2;ACSL1	0.82401	0.0840676	1
path:hsa01200	Carbon metabolism	http://www.kegg.jp/kegg-bin/show_pathway?hsa01200/847%09green/2747%09green/5211%09green/7167%09green/2746%09green/4200%09green/3418%09green	7	585	113	6948	0.732538	847;2747;5211;7167;2746;4200;3418	CAT;GLUD2;PFKL;TPI1;GLUD1;ME2;IDH2	0.833732	0.0789737	1
path:hsa04920	Adipocytokine signaling pathway	http://www.kegg.jp/kegg-bin/show_pathway?hsa04920/7132%09green/948%09green/4790%09green/2180%09green	4	585	70	6948	0.676469	7132;948;4790;2180	TNFRSF1A;CD36;NFKB1;ACSL1	0.837133	0.0772054	1
path:hsa00620	Pyruvate metabolism	http://www.kegg.jp/kegg-bin/show_pathway?hsa00620/3939%09green/4200%09green	2	585	40	6948	0.592453	3939;4200	LDHA;ME2	0.848656	0.0712684	1
path:hsa04976	Bile secretion	http://www.kegg.jp/kegg-bin/show_pathway?hsa04976/57552%09green/8714%09green/483%09green/113%09green	4	585	72	6948	0.657487	57552;8714;483;113	NCEH1;ABCC3;ATP1B3;ADCY7	0.852005	0.0695577	1
path:hsa04922	Glucagon signaling pathway	http://www.kegg.jp/kegg-bin/show_pathway?hsa04922/2776%09green/817%09green/3939%09green/90993%09green/5211%09green/5330%09green	6	585	102	6948	0.69552	2776;817;3939;90993;5211;5330	GNAQ;CAMK2D;LDHA;CREB3L1;PFKL;PLCB2	0.854233	0.0684235	1
path:hsa00340	Histidine metabolism	http://www.kegg.jp/kegg-bin/show_pathway?hsa00340/221%09green	1	585	23	6948	0.51556	221	ALDH3B1	0.856761	0.0671404	1
path:hsa03430	Mismatch repair	http://www.kegg.jp/kegg-bin/show_pathway?hsa03430/5111%09green	1	585	23	6948	0.51556	5111	PCNA	0.856761	0.0671404	1
path:hsa04975	Fat digestion and absorption	http://www.kegg.jp/kegg-bin/show_pathway?hsa04975/948%09green/8611%09green	2	585	41	6948	0.577919	948;8611	CD36;PPAP2A	0.857866	0.0665807	1
path:hsa01230	Biosynthesis of amino acids	http://www.kegg.jp/kegg-bin/show_pathway?hsa01230/5831%09green/5211%09green/7167%09green/3418%09green	4	585	74	6948	0.639531	5831;5211;7167;3418	PYCR1;PFKL;TPI1;IDH2	0.865711	0.0626269	1
path:hsa00860	Porphyrin and chlorophyll metabolism	http://www.kegg.jp/kegg-bin/show_pathway?hsa00860/3162%09green/7390%09green	2	585	42	6948	0.564077	3162;7390	HMOX1;UROS	0.866561	0.062201	1
path:hsa03050	Proteasome	http://www.kegg.jp/kegg-bin/show_pathway?hsa03050/5687%09green/5685%09green	2	585	44	6948	0.538282	5687;5685	PSMA6;PSMA4	0.882503	0.0542836	1
path:hsa00601	Glycosphingolipid biosynthesis - lacto and neolacto series	http://www.kegg.jp/kegg-bin/show_pathway?hsa00601/10678%09green	1	585	26	6948	0.455875	10678	B3GNT2	0.887702	0.0517328	1
path:hsa00983	Drug metabolism - other enzymes	http://www.kegg.jp/kegg-bin/show_pathway?hsa00983/3704%09green/7172%09green	2	585	46	6948	0.514729	3704;7172	ITPA;TPMT	0.896669	0.0473677	1
path:hsa00564	Glycerophospholipid metabolism	http://www.kegg.jp/kegg-bin/show_pathway?hsa00564/5321%09green/1606%09green/8611%09green/54947%09green/56261%09green	5	585	95	6948	0.621869	5321;1606;8611;54947;56261	PLA2G4A;DGKA;PPAP2A;LPCAT2;GPCPD1	0.897269	0.0470771	1
path:hsa00640	Propanoate metabolism	http://www.kegg.jp/kegg-bin/show_pathway?hsa00640/3939%09green	1	585	28	6948	0.42319	3939	LDHA	0.904525	0.0435792	1
path:hsa00630	Glyoxylate and dicarboxylate metabolism	http://www.kegg.jp/kegg-bin/show_pathway?hsa00630/847%09green	1	585	28	6948	0.42319	847	CAT	0.904525	0.0435792	1
path:hsa05012	Parkinson's disease	http://www.kegg.jp/kegg-bin/show_pathway?hsa05012/2773%09green/514%09green/7384%09green/7345%09green/9627%09green/4708%09green/55967%09green/2770%09green	8	585	143	6948	0.659791	2773;514;7384;7345;9627;4708;55967;2770	GNAI3;ATP5E;UQCRC1;UCHL1;SNCAIP;NDUFB2;NDUFA12;GNAI1	0.9092	0.0413407	1
path:hsa00520	Amino sugar and nucleotide sugar metabolism	http://www.kegg.jp/kegg-bin/show_pathway?hsa00520/80896%09green/64841%09green	2	585	48	6948	0.493139	80896;64841	NPL;GNPNAT1	0.909233	0.0413249	1
path:hsa04070	Phosphatidylinositol signaling system	http://www.kegg.jp/kegg-bin/show_pathway?hsa04070/5287%09green/1606%09green/5294%09green/5728%09green/5330%09green	5	585	98	6948	0.602569	5287;1606;5294;5728;5330	PIK3C2B;DGKA;PIK3CG;PTEN;PLCB2	0.910828	0.0405638	1
path:hsa00591	Linoleic acid metabolism	http://www.kegg.jp/kegg-bin/show_pathway?hsa00591/5321%09green	1	585	29	6948	0.408538	5321	PLA2G4A	0.911969	0.0400201	1
path:hsa00030	Pentose phosphate pathway	http://www.kegg.jp/kegg-bin/show_pathway?hsa00030/5211%09green	1	585	29	6948	0.408538	5211	PFKL	0.911969	0.0400201	1
path:hsa00760	Nicotinate and nicotinamide metabolism	http://www.kegg.jp/kegg-bin/show_pathway?hsa00760/23530%09green	1	585	29	6948	0.408538	23530	NNT	0.911969	0.0400201	1
path:hsa03440	Homologous recombination	http://www.kegg.jp/kegg-bin/show_pathway?hsa03440/7516%09green	1	585	29	6948	0.408538	7516	XRCC2	0.911969	0.0400201	1
path:hsa00020	Citrate cycle (TCA cycle)	http://www.kegg.jp/kegg-bin/show_pathway?hsa00020/3418%09green	1	585	30	6948	0.394863	3418	IDH2	0.918832	0.0367638	1
path:hsa05016	Huntington's disease	http://www.kegg.jp/kegg-bin/show_pathway?hsa05016/1742%09green/2876%09green/514%09green/2776%09green/7384%09green/161%09green/4708%09green/90993%09green/55967%09green/581%09green/5330%09green	11	585	193	6948	0.670732	1742;2876;514;2776;7384;161;4708;90993;55967;581;5330	DLG4;GPX1;ATP5E;GNAQ;UQCRC1;AP2A2;NDUFB2;CREB3L1;NDUFA12;BAX;PLCB2	0.928105	0.0324028	1
path:hsa00310	Lysine degradation	http://www.kegg.jp/kegg-bin/show_pathway?hsa00310/5351%09green/79709%09green	2	585	52	6948	0.454941	5351;79709	PLOD1;COLGALT1	0.930187	0.0314297	1
path:hsa04340	Hedgehog signaling pathway	http://www.kegg.jp/kegg-bin/show_pathway?hsa04340/51715%09green/81029%09green	2	585	52	6948	0.454941	51715;81029	RAB23;WNT5B	0.930187	0.0314297	1
path:hsa03410	Base excision repair	http://www.kegg.jp/kegg-bin/show_pathway?hsa03410/5111%09green	1	585	33	6948	0.358811	5111	PCNA	0.93638	0.0285477	1
path:hsa04141	Protein processing in endoplasmic reticulum	http://www.kegg.jp/kegg-bin/show_pathway?hsa04141/10808%09green/3301%09green/56681%09green/824%09green/4121%09green/3337%09green/23645%09green/23480%09green/581%09green	9	585	169	6948	0.626757	10808;3301;56681;824;4121;3337;23645;23480;581	HSPH1;DNAJA1;SAR1A;CAPN2;MAN1A1;DNAJB1;PPP1R15A;SEC61G;BAX	0.941951	0.0259718	1
path:hsa00980	Metabolism of xenobiotics by cytochrome P450	http://www.kegg.jp/kegg-bin/show_pathway?hsa00980/4257%09green/1545%09green/221%09green	3	585	74	6948	0.478824	4257;1545;221	MGST1;CYP1B1;ALDH3B1	0.944977	0.0245789	1
path:hsa00500	Starch and sucrose metabolism	http://www.kegg.jp/kegg-bin/show_pathway?hsa00500/2548%09green/8972%09green	2	585	56	6948	0.4222	2548;8972	GAA;MGAM	0.946511	0.0238742	1
path:hsa03030	DNA replication	http://www.kegg.jp/kegg-bin/show_pathway?hsa03030/5111%09green	1	585	36	6948	0.328767	5111	PCNA	0.95014	0.0222125	1
path:hsa00230	Purine metabolism	http://www.kegg.jp/kegg-bin/show_pathway?hsa00230/50484%09green/3704%09green/953%09green/113%09green/10846%09green/8654%09green/2983%09green/5139%09green/26289%09green	9	585	175	6948	0.604732	50484;3704;953;113;10846;8654;2983;5139;26289	RRM2B;ITPA;ENTPD1;ADCY7;PDE10A;PDE5A;GUCY1B3;PDE3A;AK5	0.954691	0.0201372	1
path:hsa00561	Glycerolipid metabolism	http://www.kegg.jp/kegg-bin/show_pathway?hsa00561/1606%09green/8611%09green	2	585	59	6948	0.400558	1606;8611	DGKA;PPAP2A	0.956297	0.0194072	1
path:hsa00270	Cysteine and methionine metabolism	http://www.kegg.jp/kegg-bin/show_pathway?hsa00270/3939%09green	1	585	38	6948	0.311373	3939	LDHA	0.957619	0.0188073	1
path:hsa04140	Regulation of autophagy	http://www.kegg.jp/kegg-bin/show_pathway?hsa04140/115201%09green	1	585	39	6948	0.303346	115201	ATG4A	0.960927	0.0173095	1
path:hsa05204	Chemical carcinogenesis	http://www.kegg.jp/kegg-bin/show_pathway?hsa05204/4257%09green/1545%09green/221%09green	3	585	81	6948	0.436999	4257;1545;221	MGST1;CYP1B1;ALDH3B1	0.963865	0.015984	1
path:hsa00260	Glycine, serine and threonine metabolism	http://www.kegg.jp/kegg-bin/show_pathway?hsa00260/314%09green	1	585	40	6948	0.295719	314	AOC2	0.963978	0.015933	1
path:hsa05033	Nicotine addiction	http://www.kegg.jp/kegg-bin/show_pathway?hsa05033/2561%09green	1	585	40	6948	0.295719	2561	GABRB2	0.963978	0.015933	1
path:hsa04120	Ubiquitin mediated proteolysis	http://www.kegg.jp/kegg-bin/show_pathway?hsa04120/330%09green/7334%09green/867%09green/11065%09green/23327%09green/4281%09green	6	585	137	6948	0.515185	330;7334;867;11065;23327;4281	BIRC3;UBE2N;CBL;UBE2C;NEDD4L;MID1	0.97084	0.0128522	1
path:hsa00071	Fatty acid degradation	http://www.kegg.jp/kegg-bin/show_pathway?hsa00071/2180%09green	1	585	44	6948	0.26868	2180	ACSL1	0.97398	0.01145	1
path:hsa00240	Pyrimidine metabolism	http://www.kegg.jp/kegg-bin/show_pathway?hsa00240/50484%09green/3704%09green/953%09green/7298%09green	4	585	105	6948	0.448685	50484;3704;953;7298	RRM2B;ITPA;ENTPD1;TYMS	0.974359	0.0112811	1
path:hsa04910	Insulin signaling pathway	http://www.kegg.jp/kegg-bin/show_pathway?hsa04910/867%09green/2885%09green/5594%09green/4893%09green/5501%09green/5294%09green	6	585	140	6948	0.503923	867;2885;5594;4893;5501;5294	CBL;GRB2;MAPK1;NRAS;PPP1CC;PIK3CG	0.97493	0.0110265	1
path:hsa00982	Drug metabolism - cytochrome P450	http://www.kegg.jp/kegg-bin/show_pathway?hsa00982/4257%09green/221%09green	2	585	68	6948	0.347089	4257;221	MGST1;ALDH3B1	0.976406	0.0103694	1
path:hsa03420	Nucleotide excision repair	http://www.kegg.jp/kegg-bin/show_pathway?hsa03420/5111%09green	1	585	47	6948	0.251421	5111	PCNA	0.979615	0.00894453	1
path:hsa03015	mRNA surveillance pathway	http://www.kegg.jp/kegg-bin/show_pathway?hsa03015/80335%09green/5501%09green/9775%09green	3	585	91	6948	0.388411	80335;5501;9775	WDR82;PPP1CC;EIF4A3	0.980544	0.00853278	1
path:hsa04330	Notch signaling pathway	http://www.kegg.jp/kegg-bin/show_pathway?hsa04330/3516%09green	1	585	48	6948	0.246147	3516	RBPJ	0.981208	0.00823879	1
path:hsa04742	Taste transduction	http://www.kegg.jp/kegg-bin/show_pathway?hsa04742/5330%09green	1	585	53	6948	0.222764	5330	PLCB2	0.987492	0.0054663	1
path:hsa03460	Fanconi anemia pathway	http://www.kegg.jp/kegg-bin/show_pathway?hsa03460/29089%09green	1	585	53	6948	0.222764	29089	UBE2T	0.987492	0.0054663	1
path:hsa00830	Retinol metabolism	http://www.kegg.jp/kegg-bin/show_pathway?hsa00830/51109%09green	1	585	65	6948	0.181322	51109	RDH11	0.995297	0.00204736	1
path:hsa00970	Aminoacyl-tRNA biosynthesis	http://www.kegg.jp/kegg-bin/show_pathway?hsa00970/283459%09green	1	585	66	6948	0.178549	283459	GATC	0.995665	0.00188661	1
path:hsa04622	RIG-I-like receptor signaling pathway	http://www.kegg.jp/kegg-bin/show_pathway?hsa04622/4790%09green	1	585	70	6948	0.168249	4790	NFKB1	0.996873	0.00136033	1
path:hsa03018	RNA degradation	http://www.kegg.jp/kegg-bin/show_pathway?hsa03018/5211%09green	1	585	77	6948	0.152798	5211	PFKL	0.998234	0.000767449	1
path:hsa01130	Biosynthesis of antibiotics	http://www.kegg.jp/kegg-bin/show_pathway?hsa01130/847%09green/3939%09green/5831%09green/5211%09green/7167%09green/3418%09green/26289%09green	7	585	214	6948	0.381092	847;3939;5831;5211;7167;3418;26289	CAT;LDHA;PYCR1;PFKL;TPI1;IDH2;AK5	0.998801	0.000520959	1
path:hsa03008	Ribosome biogenesis in eukaryotes	http://www.kegg.jp/kegg-bin/show_pathway?hsa03008/55505%09green	1	585	87	6948	0.135038	55505	NOP10	0.999221	0.000338612	1
path:hsa01100	Metabolic pathways	http://www.kegg.jp/kegg-bin/show_pathway?hsa01100/2530%09green/5287%09green/2589%09green/2799%09green/166929%09green/8564%09green/514%09green/23545%09green/66008%09green/50484%09green/22856%09green/7384%09green/8309%09green/3704%09green/5730%09green/6483%09green/314%09green/5740%09green/6303%09green/9517%09green/10678%09green/2548%09green/526%09green/4708%09green/249%09green/9114%09green/523%09gr…	69	585	1228	6948	0.622869	2530;5287;2589;2799;166929;8564;514;23545;66008;50484;22856;7384;8309;3704;5730;6483;314;5740;6303;9517;10678;2548;526;4708;249;9114;523;2747;1798;5321;4121;3939;290;6916;2131;51056;259230;53354;8972;1606;8611;5831;55512;2687;54947;7298;55967;27235;253782;5211;7167;2135;283459;533;79868;2746;427;80270;221;7390;51109;8644;1586;10312;3418;26289;2180;5330;23530	FUT8;PIK3C2B;GALNT1;GNS;SGMS2;KMO;ATP5E;ATP6V0A2;TRAK2;RRM2B;CHSY1;UQCRC1;ACOX2;ITPA;PTGDS;ST3GAL2;AOC2;PTGIS;SAT1;SPTLC2;B3GNT2;GAA;ATP6V1B2;NDUFB2;ALPL;ATP6V0D1;ATP6V1A;GLUD2;DPAGT1;PLA2G4A;MAN1A1;LDHA;ANPEP;TBXAS1;EXT1;LAP3;SGMS1;PANK1;MGAM;DGKA;PPAP2A;PYCR1;SMPD3;GGT5;LPCAT2;TYMS;NDUFA12;COQ2;CERS6;PFKL;TPI1;EXTL2;GATC;ATP6V0B;ALG13;GLUD1;ASAH1;HSD3B7;ALDH3B1;UROS;RDH11;AKR1C3;CYP17A1;TCIRG1;…	0.999936	2.7717e-05	1
path:hsa03040	Spliceosome	http://www.kegg.jp/kegg-bin/show_pathway?hsa03040/9775%09green	1	585	133	6948	0.0877408	9775	EIF4A3	0.999982	7.75353e-06	1
path:hsa03010	Ribosome	http://www.kegg.jp/kegg-bin/show_pathway?hsa03010/51065%09green	1	585	137	6948	0.085129	51065	RPS27L	0.999987	5.5768e-06	1
path:hsa03013	RNA transport	http://www.kegg.jp/kegg-bin/show_pathway?hsa03013/9775%09green/79228%09green	2	585	172	6948	0.135147	9775;79228	EIF4A3;THOC6	0.999989	4.5656e-06	1
path:hsa04740	Olfactory transduction	http://www.kegg.jp/kegg-bin/show_pathway?hsa04740/409%09green/817%09green/162998%09green	3	585	407	6948	0.0828415	409;817;162998	ARRB2;CAMK2D;OR7D2	1	0	1
