# Supplementary material for: lnc-SAMD14-4 can regulate expression of the COL1A1 and COL1A2 in human chondrocytes
Source: PeerJ. 2019 Sep 2;7:e7491. doi: 10.7717/peerj.7491 (PMC6727836; doi:10.7717/peerj.7491)
Supplement: Table S13 [file peerj-07-7491-s019.xlsx]

## Sheet: Supplementary Table 12
GeneSymbols
PIK3AP1
COL4A1
IFNAR2
GRB2
AKT3
GNG2
MAPK1
CDKN1A
CCND1
PRKAA2
MCL1
NRAS
CSF1R
MYC
NFKB1
YWHAH
IL7R
COL1A2
THBS3
DDIT4
SGK1
PRLR
ITGAV
IL3RA
PDGFRB
COL2A1
ITGA7
ANGPT1
CCNE1
IL4R
COL6A1
PIK3R1
COL5A1
COL4A2
COL24A1
VEGFC
FGF7
COL1A1
FGF11
PRKCZ
CSF1
COL6A3
LPAR6
ITGA11
LAMC1
COL6A2
GNG7
MET
THBS2
GNG11
KIT
KITLG
IL6
ITGB1
LAMA1
FGFR2
TLR4
IGF1
TNC
PTEN
ITGB5
ANGPT2
PIK3CG
FGF10
CREB3L1
CDK6
PGF
PDGFC
VEGFB
KDR
LAMB1
ITGB3
BCL2L11
LAMA4
