# Supplementary material for: lnc-SAMD14-4 can regulate expression of the COL1A1 and COL1A2 in human chondrocytes
Source: PeerJ. 2019 Sep 2;7:e7491. doi: 10.7717/peerj.7491 (PMC6727836; doi:10.7717/peerj.7491)
Supplement: Table S15 [file peerj-07-7491-s021.xlsx]

## Sheet: cor_with PI3K-Akt_top500
GeneSymbols	PrimaryID	pvalue	correlation	abs
COL1A2	lnc-CASD1-2:1	1.58e-10	0.997547	0.997547
COL6A3	lnc-AC112721.1.1-4:1	7.34e-10	0.996397	0.996397
COL1A1	lnc-SAMD14-5:1	8.92e-10	0.996217	0.996217
AKT3	lnc-SLFN12-6:1	2.04e-09	-0.995346	0.995346
THBS2	lnc-AC112721.1.1-3:1	5.28e-09	0.994095	0.994095
PDGFRB	lnc-CSF1R-2:1	5.7e-09	0.993981	0.993981
IGF1	lnc-LAMB4-1:1	6.91e-09	0.993684	0.993684
THBS2	lnc-HIST4H4-1:2	1.69e-08	-0.992103	0.992103
MYC	lnc-KIAA1244-2:1	1.86e-08	0.991906	0.991906
COL6A1	lnc-S100A11-2:1	2.03e-08	0.991729	0.991729
COL2A1	lnc-RP1-228P16.5.1-3:1	2.18e-08	0.991579	0.991579
ITGB1	lnc-IRGM-3:1	2.18e-08	-0.991574	0.991574
THBS2	lnc-LRRC58-3:1	2.76e-08	0.991065	0.991065
LPAR6	lnc-RCBTB2-5:1	2.87e-08	0.990975	0.990975
ITGB1	lnc-NRP1-6:1	3.11e-08	0.990791	0.990791
COL5A1	lnc-SLC10A7-8:1	3.11e-08	0.990791	0.990791
COL5A1	lnc-LRRC58-2:1	3.23e-08	0.990704	0.990704
LPAR6	lnc-DAZL-4:1	3.25e-08	0.990687	0.990687
THBS2	lnc-LRRC58-2:1	3.42e-08	0.990571	0.990571
PIK3AP1	lnc-ISL1-3:1	4.8e-08	0.989732	0.989732
FGF7	lnc-C21orf7-5:1	5.12e-08	0.989568	0.989568
FGFR2	lnc-ATE1-8:1	5.25e-08	0.989502	0.989502
GNG7	lnc-WDFY1-2:3	5.73e-08	0.989267	0.989267
GNG7	lnc-C8orf46-1:4	5.81e-08	-0.989229	0.989229
ITGA7	lnc-CASP5-2:1	6.03e-08	0.989129	0.989129
KDR	lnc-EMCN-1:1	7.03e-08	0.988702	0.988702
NRAS	lnc-RAB8A-1:1	7.42e-08	0.988548	0.988548
IL4R	lnc-FAM46B-1:2	7.64e-08	0.988464	0.988464
IL4R	lnc-AKR1C3-3:1	7.68e-08	0.988448	0.988448
COL1A2	lnc-SAMD14-4:2	7.91e-08	0.988362	0.988362
COL6A3	lnc-COL6A3-7:1	7.98e-08	0.988338	0.988338
MCL1	lnc-ZBTB16-1:1	8.8e-08	0.988048	0.988048
NRAS	lnc-RGS2-1:1	9.12e-08	0.987941	0.987941
COL6A1	lnc-AC112721.1.1-2:1	9.82e-08	0.987714	0.987714
COL4A2	lnc-GABPA-10:1	9.93e-08	0.987681	0.987681
THBS3	lnc-THBS3-2:3	9.93e-08	0.987681	0.987681
FGF7	lnc-B9D1-3:1	1.02e-07	0.987585	0.987585
THBS2	lnc-WISP1-5:2	1.1e-07	0.987366	0.987366
THBS2	lnc-CASD1-2:1	1.13e-07	0.987276	0.987276
PRLR	lnc-SYCP3-1:1	1.13e-07	0.987266	0.987266
CSF1R	lnc-E2F7-7:1	1.14e-07	0.98725	0.98725
GNG7	lnc-WWOX-4:2	1.2e-07	-0.987092	0.987092
ITGB1	lnc-IRGM-2:1	1.23e-07	-0.986988	0.986988
LAMC1	lnc-CRYBA4-2:1	1.27e-07	0.98689	0.98689
GNG7	lnc-WHAMM-2:2	1.27e-07	-0.986889	0.986889
COL6A1	lnc-SLC10A7-8:1	1.29e-07	0.986849	0.986849
COL5A1	lnc-ACSL6-1:1	1.31e-07	0.986802	0.986802
COL1A1	lnc-RHD-3:1	1.34e-07	0.986716	0.986716
SGK1	lnc-FAM120A-4:1	1.41e-07	-0.98655	0.98655
THBS3	lnc-MUC1-1:1	1.65e-07	0.986001	0.986001
SGK1	RUNX1-IT1:1	1.73e-07	0.985846	0.985846
COL1A1	lnc-SAMD14-6:1	1.82e-07	0.985665	0.985665
THBS2	lnc-COL6A3-7:1	1.87e-07	0.98556	0.98556
IL4R	lnc-APOL2-2:1	1.95e-07	0.985413	0.985413
FGF10	lnc-IVNS1ABP-3:1	1.95e-07	-0.985402	0.985402
SGK1	lnc-SLC2A12-7:1	2e-07	0.985315	0.985315
COL6A3	lnc-AC112721.1.1-2:1	2.04e-07	0.985245	0.985245
KDR	lnc-CD36-5:1	2.1e-07	0.98514	0.98514
COL6A1	lnc-SFTPC-3:1	2.26e-07	0.984863	0.984863
IL4R	lnc-LHFPL2-1:1	2.29e-07	0.984798	0.984798
FGF7	lnc-GALK2-2:1	2.29e-07	0.984798	0.984798
AKT3	lnc-PADI2-1:1	2.34e-07	-0.984715	0.984715
COL6A1	lnc-GULP1-4:1	2.43e-07	0.98458	0.98458
COL1A1	lnc-PTPRB-5:1	2.48e-07	-0.984496	0.984496
COL6A3	lnc-C15orf60-2:1	2.48e-07	0.984493	0.984493
COL1A2	lnc-TERF2IP-2:1	2.52e-07	-0.984435	0.984435
COL5A1	lnc-SMAD5-6:1	2.53e-07	0.984421	0.984421
PIK3CG	lnc-NUDT22-2:1	2.56e-07	0.98437	0.98437
THBS2	lnc-TERF2IP-4:1	2.59e-07	-0.984325	0.984325
NRAS	lnc-KDSR-2:1	2.64e-07	-0.984257	0.984257
ITGB1	lnc-AC112721.1.1-2:1	2.77e-07	0.984055	0.984055
COL2A1	lnc-VDR-1:1	2.8e-07	0.984025	0.984025
CSF1R	lnc-IFI44-3:1	2.8e-07	0.984024	0.984024
COL1A1	lnc-CLRN3-3:1	2.83e-07	0.983982	0.983982
FGF10	lnc-C1QTNF1-2:1	2.86e-07	0.983938	0.983938
COL6A1	lnc-GULP1-3:1	2.9e-07	0.98388	0.98388
THBS2	lnc-TERF2IP-2:1	2.91e-07	-0.983856	0.983856
COL5A1	lnc-GULP1-4:1	2.92e-07	0.983853	0.983853
MCL1	lnc-PKD1-1:1	2.95e-07	-0.983812	0.983812
GNG7	lnc-RAB5A-1:1	2.95e-07	-0.983811	0.983811
COL1A1	lnc-C1QTNF4-1:1	3.08e-07	0.983628	0.983628
IFNAR2	lnc-GFRA2-4:1	3.09e-07	0.983612	0.983612
GNG7	lnc-RAB5A-2:1	3.16e-07	-0.983527	0.983527
NRAS	lnc-NAV1-4:1	3.23e-07	0.98344	0.98344
COL1A2	lnc-TERF2IP-4:1	3.25e-07	-0.983407	0.983407
AKT3	lnc-CEP170-11:1	3.28e-07	0.983366	0.983366
LPAR6	lnc-FCER1G-1:1	3.28e-07	0.983364	0.983364
COL6A1	lnc-AC112721.1.1-4:1	3.35e-07	0.983284	0.983284
COL1A2	lnc-AC112721.1.1-3:1	3.41e-07	0.983203	0.983203
NRAS	lnc-KCNJ16-4:1	3.44e-07	-0.983169	0.983169
ITGB1	lnc-CCDC18-3:1	3.64e-07	0.982934	0.982934
COL6A3	lnc-SEMA4A-1:1	3.7e-07	0.982859	0.982859
COL5A1	lnc-GULP1-3:1	3.7e-07	0.982854	0.982854
COL1A1	lnc-SAMD14-4:2	3.73e-07	0.982819	0.982819
GNG2	lnc-HAO2-9:1	3.8e-07	-0.982738	0.982738
GNG7	lnc-CTC-349C3.2.1-5:1	3.81e-07	-0.982732	0.982732
KIT	ENST00000618835.1	3.86e-07	0.982676	0.982676
PIK3CG	lnc-LILRA4-1:5	3.93e-07	0.982598	0.982598
COL1A1	lnc-E2F6-4:1	3.96e-07	0.982566	0.982566
COL6A1	lnc-SMAD5-6:1	3.97e-07	0.982556	0.982556
TNC	lnc-SMAD5-7:1	4.05e-07	0.982469	0.982469
COL4A1	lnc-ADAM10-10:1	4.12e-07	-0.98239	0.98239
FGF10	lnc-EHF-6:1	4.12e-07	0.982389	0.982389
IL4R	lnc-SLC38A11-4:1	4.2e-07	-0.982305	0.982305
COL1A1	lnc-TXNDC2-6:1	4.25e-07	0.982255	0.982255
PIK3CG	lnc-CD163-2:1	4.3e-07	0.982202	0.982202
COL1A1	lnc-TSPAN13-4:1	4.31e-07	0.982193	0.982193
NRAS	lnc-KDSR-6:1	4.31e-07	-0.982185	0.982185
GNG7	lnc-PKD1-1:1	4.44e-07	-0.982053	0.982053
COL1A1	lnc-C4orf26-3:1	4.45e-07	-0.982047	0.982047
PIK3AP1	lnc-RPS14-4:1	4.56e-07	0.981935	0.981935
ITGB1	lnc-SYDE2-1:1	4.66e-07	-0.981831	0.981831
ITGA11	lnc-GALNTL4-6:1	4.7e-07	0.981796	0.981796
ITGB1	lnc-MOGAT2-5:1	4.82e-07	0.981679	0.981679
COL6A1	lnc-LRRC58-2:1	4.87e-07	0.981633	0.981633
GNG2	lnc-GNB4-1:1	4.87e-07	0.981631	0.981631
CSF1R	lnc-RCBTB2-5:1	4.95e-07	0.981556	0.981556
CSF1R	lnc-MS4A6E-1:1	4.96e-07	0.981547	0.981547
MYC	ENST00000616099.1	4.96e-07	-0.981545	0.981545
VEGFC	lnc-SERINC1-7:1	5.06e-07	-0.981455	0.981455
COL6A1	lnc-SEMA4A-1:1	5.19e-07	0.981335	0.981335
COL4A2	lnc-HFM1-2:1	5.4e-07	-0.981152	0.981152
KDR	lnc-TFPI-1:1	5.44e-07	0.981116	0.981116
COL6A3	lnc-SLC10A7-8:1	5.62e-07	0.980957	0.980957
FGF7	lnc-SEMA4B-6:1	5.83e-07	0.980786	0.980786
COL6A3	lnc-GULP1-4:1	5.86e-07	0.980758	0.980758
SGK1	lnc-RCAN1-6:1	5.89e-07	0.980735	0.980735
COL5A1	lnc-DHX32-4:1	6.02e-07	0.980629	0.980629
COL6A1	ENST00000623984.1	6.13e-07	-0.980536	0.980536
FGF7	lnc-AKR1C3-3:1	6.17e-07	0.980507	0.980507
NRAS	lnc-NYNRIN-1:1	6.2e-07	0.980487	0.980487
COL6A3	lnc-SFTPC-3:1	6.21e-07	0.980474	0.980474
COL1A2	lnc-LRRC58-3:1	6.22e-07	0.980466	0.980466
NRAS	lnc-ZFP36L1-4:1	6.25e-07	0.980441	0.980441
FGFR2	lnc-ATE1-7:1	6.37e-07	0.980349	0.980349
COL2A1	lnc-XIAP-9:1	6.46e-07	0.98028	0.98028
THBS2	lnc-PSAT1-5:1	6.64e-07	0.980146	0.980146
CSF1R	lnc-LILRA3-1:2	6.68e-07	0.980117	0.980117
PRLR	lnc-KIAA0226-2:10	6.79e-07	0.98003	0.98003
IGF1	lnc-LAMB4-2:1	6.82e-07	0.980012	0.980012
IFNAR2	lnc-CTAG2-1:2	6.85e-07	0.979986	0.979986
NRAS	lnc-SLC2A14-3:1	6.91e-07	0.979946	0.979946
CSF1R	lnc-GPRIN3-2:1	6.92e-07	0.979934	0.979934
COL1A1	lnc-GNAT3-7:1	6.99e-07	0.979889	0.979889
ITGB1	lnc-ZNF697-1:1	7.02e-07	0.979864	0.979864
MCL1	ENST00000597278.2	7.03e-07	-0.979857	0.979857
IGF1	lnc-PMCH-4:1	7.13e-07	0.979787	0.979787
COL5A1	lnc-SLC41A3-1:2	7.37e-07	-0.979617	0.979617
MCL1	lnc-PPEF2-2:1	7.46e-07	-0.979556	0.979556
COL24A1	lnc-ATG12-5:1	7.56e-07	-0.979487	0.979487
COL1A1	lnc-IRX3-4:15	7.58e-07	0.97947	0.97947
KDR	lnc-C10orf131-2:1	7.58e-07	0.979469	0.979469
NRAS	lnc-MAP2K6-4:1	7.59e-07	-0.979467	0.979467
KDR	lnc-C1QTNF5-6:1	7.73e-07	0.979373	0.979373
CSF1R	lnc-ZCCHC13-10:1	7.77e-07	0.979344	0.979344
IGF1	lnc-ZEB2-1:1	7.82e-07	0.979312	0.979312
COL6A1	lnc-C15orf60-2:1	8e-07	0.979191	0.979191
COL1A1	lnc-OBFC2A-13:1	8e-07	0.979189	0.979189
COL6A3	lnc-LRRC58-3:1	8.19e-07	0.97907	0.97907
NFKB1	lnc-HHAT-3:1	8.22e-07	-0.97905	0.97905
CCNE1	lnc-CDC42BPA-5:1	8.34e-07	0.97897	0.97897
GNG7	lnc-ZDHHC23-1:1	8.38e-07	-0.978947	0.978947
COL1A1	lnc-UBTD2-1:1	8.46e-07	0.978895	0.978895
THBS2	lnc-GULP1-4:1	8.98e-07	0.978574	0.978574
NRAS	lnc-SLC2A14-2:1	9.01e-07	0.978558	0.978558
COL4A1	lnc-HFM1-2:1	9.2e-07	-0.978444	0.978444
LPAR6	lnc-IFI44-3:1	9.35e-07	0.97836	0.97836
IL4R	lnc-EAPP-3:1	9.52e-07	0.978257	0.978257
IFNAR2	lnc-LILRA3-1:3	9.63e-07	0.978195	0.978195
GNG7	lnc-NBN-2:1	9.85e-07	-0.978075	0.978075
IL3RA	lnc-ZNF366-1:1	9.86e-07	0.978069	0.978069
AKT3	lnc-CEP170-4:3	9.88e-07	0.978055	0.978055
COL6A2	lnc-SWI5-3:1	9.9e-07	0.978043	0.978043
BCL2L11	lnc-RNF150-4:1	9.91e-07	0.978037	0.978037
SGK1	lnc-C6orf123-1:2	9.92e-07	-0.978035	0.978035
THBS2	lnc-AC112721.1.1-4:1	9.94e-07	0.978023	0.978023
VEGFC	lnc-GALK2-2:1	1e-06	0.977967	0.977967
IL4R	lnc-TPST2-1:1	1e-06	0.977962	0.977962
THBS2	lnc-VMP1-3:2	1.01e-06	0.977947	0.977947
CSF1R	lnc-FCER1G-1:1	1.02e-06	0.977868	0.977868
COL1A1	lnc-AL136219.1-4:7	1.03e-06	0.97784	0.97784
ITGB1	lnc-MAP6-1:1	1.05e-06	0.977712	0.977712
VEGFC	lnc-TMEM188-4:1	1.07e-06	0.977624	0.977624
COL6A3	lnc-S100A11-2:1	1.07e-06	0.977614	0.977614
THBS2	lnc-FAM133B-2:1	1.07e-06	0.977612	0.977612
FGFR2	lnc-SYCP3-4:1	1.1e-06	-0.977439	0.977439
COL1A1	lnc-LMO1-3:2	1.12e-06	-0.977333	0.977333
GNG7	lnc-CBLL1-4:1	1.13e-06	-0.977305	0.977305
CSF1R	lnc-GIMAP7-1:1	1.15e-06	0.977214	0.977214
COL6A1	lnc-DHX32-4:1	1.16e-06	0.977165	0.977165
AKT3	lnc-FAM13B-1:1	1.16e-06	0.977145	0.977145
NRAS	lnc-BORA-25:1	1.17e-06	0.97709	0.97709
LPAR6	lnc-CUL3-2:1	1.19e-06	0.976982	0.976982
PIK3CG	lnc-ITGAD-2:1	1.2e-06	0.976939	0.976939
COL6A3	lnc-FERMT2-3:1	1.23e-06	0.976819	0.976819
COL1A2	lnc-AC091435.2-2:1	1.24e-06	-0.976788	0.976788
COL1A1	lnc-C16orf88-4:1	1.24e-06	0.976747	0.976747
FGF10	lnc-PLXNA4-1:1	1.24e-06	0.976744	0.976744
TNC	lnc-PGCP.1-3:2	1.25e-06	-0.976733	0.976733
SGK1	lnc-VMP1-3:2	1.26e-06	0.976675	0.976675
COL4A1	lnc-CARKD-3:1	1.27e-06	0.976639	0.976639
COL4A1	lnc-BAG3-6:1	1.27e-06	-0.976612	0.976612
LPAR6	lnc-ZCCHC13-10:1	1.28e-06	0.976591	0.976591
PIK3CG	lnc-ZNF643-2:1	1.28e-06	0.976574	0.976574
SGK1	lnc-ARF6-3:1	1.29e-06	0.976547	0.976547
CSF1R	lnc-DAZL-4:1	1.29e-06	0.976532	0.976532
PDGFRB	lnc-CSF1R-3:1	1.29e-06	0.976528	0.976528
IGF1	lnc-IFI44-3:1	1.3e-06	0.976496	0.976496
COL24A1	lnc-SGK3-1:1	1.3e-06	-0.976476	0.976476
BCL2L11	lnc-ABHD10-2:1	1.33e-06	0.97635	0.97635
IL4R	lnc-GTF2A2-6:1	1.34e-06	0.976315	0.976315
PDGFRB	lnc-CSF1R-1:1	1.34e-06	0.976312	0.976312
COL6A1	lnc-PYCR1-1:1	1.35e-06	0.976284	0.976284
KDR	lnc-GIMAP7-1:1	1.36e-06	0.976236	0.976236
NRAS	lnc-SLC2A7-2:1	1.36e-06	0.976221	0.976221
IL4R	lnc-B9D1-3:1	1.36e-06	0.976214	0.976214
MCL1	lnc-SMOC2-5:1	1.36e-06	0.976207	0.976207
MCL1	lnc-C2orf67-1:1	1.37e-06	-0.97617	0.97617
MCL1	lnc-WDFY1-2:3	1.38e-06	0.976144	0.976144
CDKN1A	lnc-ADK-1:1	1.38e-06	0.976133	0.976133
COL6A2	lnc-TACR3-3:1	1.39e-06	-0.976099	0.976099
GNG7	ENST00000617603.1	1.39e-06	-0.976095	0.976095
FGF10	lnc-C1QTNF1-2:1	1.39e-06	0.976074	0.976074
COL1A2	lnc-HIST4H4-1:2	1.42e-06	-0.975968	0.975968
IL7R	ENST00000584957.2	1.42e-06	-0.975959	0.975959
VEGFC	lnc-NUP210L-2:1	1.42e-06	0.975939	0.975939
COL6A3	lnc-LRRC58-2:1	1.44e-06	0.975881	0.975881
GNG2	lnc-OBFC2A-13:1	1.45e-06	0.975845	0.975845
THBS2	lnc-MTNR1A-2:1	1.48e-06	0.975685	0.975685
COL6A3	lnc-RAB23-6:1	1.49e-06	0.975655	0.975655
COL1A2	lnc-MTNR1A-3:1	1.5e-06	0.975637	0.975637
SGK1	lnc-RP11-171N4.2.1-2:3	1.5e-06	0.97561	0.97561
TLR4	lnc-TMEM188-4:1	1.52e-06	0.975534	0.975534
ITGB1	lnc-HACL1-9:1	1.53e-06	0.975486	0.975486
TLR4	lnc-ERVFRD-1-1:1	1.54e-06	0.97546	0.97546
TLR4	lnc-RP11-187E13.1.1-2:1	1.54e-06	-0.975457	0.975457
SGK1	lnc-CYP3A7-2:7	1.55e-06	-0.975407	0.975407
CSF1R	lnc-PLVAP-4:1	1.56e-06	0.975396	0.975396
GNG2	ENST00000624682.1	1.56e-06	0.975382	0.975382
MYC	lnc-ANXA3-8:1	1.57e-06	0.975349	0.975349
COL24A1	lnc-BCL2L15-3:1	1.58e-06	-0.975307	0.975307
IGF1	lnc-GS1-211B7.1.1-4:1	1.58e-06	0.975304	0.975304
GNG7	ENST00000597278.2	1.59e-06	-0.975269	0.975269
AKT3	lnc-C10orf113-1:1	1.59e-06	0.975254	0.975254
IGF1	lnc-ABHD10-2:1	1.6e-06	0.975232	0.975232
IGF1	lnc-CTSL1-8:1	1.61e-06	0.975201	0.975201
PTEN	lnc-CYP3A43-1:1	1.61e-06	-0.975194	0.975194
GNG2	lnc-TSPAN13-4:1	1.62e-06	0.975163	0.975163
CCNE1	lnc-FBLN5-1:1	1.62e-06	0.97513	0.97513
IL4R	lnc-PADI2-1:1	1.64e-06	0.975055	0.975055
MCL1	lnc-SLC2A12-7:1	1.66e-06	0.975012	0.975012
GNG7	LINC00623:30	1.66e-06	-0.974994	0.974994
TNC	lnc-AZI2-6:1	1.67e-06	-0.974948	0.974948
MCL1	ENST00000613838.1	1.69e-06	-0.974892	0.974892
COL5A1	lnc-GORAB-1:1	1.7e-06	0.974856	0.974856
COL6A3	lnc-DHX32-4:1	1.7e-06	0.974834	0.974834
THBS2	lnc-TTC23L-2:1	1.72e-06	0.974777	0.974777
COL24A1	lnc-RP3-377D14.1.1-14:1	1.72e-06	-0.974777	0.974777
THBS2	lnc-SLC10A7-8:1	1.72e-06	0.974754	0.974754
COL5A1	lnc-RP11-363G10.2.1-1:1	1.74e-06	0.974706	0.974706
IL4R	lnc-GPR155-5:1	1.74e-06	0.97469	0.97469
COL5A1	lnc-FAM133B-2:1	1.74e-06	0.974689	0.974689
COL6A3	lnc-AC112721.1.1-3:1	1.74e-06	0.974685	0.974685
COL1A2	lnc-TXNDC2-7:1	1.75e-06	0.974672	0.974672
GNG7	lnc-C2orf67-1:1	1.76e-06	-0.97461	0.97461
COL1A2	lnc-VMP1-3:2	1.77e-06	0.974588	0.974588
IFNAR2	lnc-RPS14-4:1	1.78e-06	0.97456	0.97456
BCL2L11	lnc-ZCCHC13-10:1	1.78e-06	0.974535	0.974535
LPAR6	lnc-E2F7-7:1	1.8e-06	0.974492	0.974492
PRLR	lnc-ERMN-4:1	1.8e-06	0.974473	0.974473
SGK1	lnc-C9orf89-3:1	1.82e-06	-0.974407	0.974407
SGK1	lnc-XRCC3-6:1	1.83e-06	-0.974369	0.974369
GNG2	ENST00000618841.1	1.83e-06	-0.974361	0.974361
COL4A1	lnc-LGI2-2:1	1.84e-06	-0.974341	0.974341
COL1A2	lnc-C4orf26-3:1	1.84e-06	-0.974328	0.974328
COL1A1	lnc-MYOZ2-1:1	1.85e-06	-0.974294	0.974294
COL6A3	lnc-GULP1-3:1	1.86e-06	0.974259	0.974259
AKT3	lnc-MAB21L1-4:1	1.86e-06	-0.974251	0.974251
COL5A1	lnc-AC112721.1.1-3:1	1.88e-06	0.974205	0.974205
COL4A2	lnc-RBMS3-5:1	1.91e-06	-0.974103	0.974103
COL5A1	lnc-S100A11-2:1	1.91e-06	0.974094	0.974094
THBS2	lnc-AC091435.2-2:1	1.91e-06	-0.974093	0.974093
AKT3	lnc-NPVF-4:1	1.91e-06	0.97408	0.97408
COL1A2	lnc-COL6A3-7:1	1.92e-06	0.974076	0.974076
THBS2	lnc-DHX32-4:1	1.92e-06	0.974074	0.974074
CSF1R	lnc-ELMO1-2:1	1.92e-06	0.974045	0.974045
FGFR2	lnc-BMP6-3:4	1.93e-06	0.97403	0.97403
NRAS	lnc-SLC1A5-1:1	1.93e-06	0.974028	0.974028
IL4R	lnc-MXI1-1:1	1.93e-06	0.974012	0.974012
PGF	lnc-HOXA11-2:1	1.94e-06	-0.973999	0.973999
CCNE1	lnc-NYNRIN-1:1	1.95e-06	0.973966	0.973966
THBS2	lnc-CPEB4-6:1	1.97e-06	-0.973896	0.973896
IFNAR2	lnc-HSPA6-3:1	1.98e-06	0.973865	0.973865
LAMB1	lnc-C7orf30-3:1	2.02e-06	0.973742	0.973742
ITGB5	lnc-NUP54-2:1	2.02e-06	0.973715	0.973715
GNG2	lnc-C8orf45-2:1	2.03e-06	-0.973704	0.973704
ITGA7	lnc-ATP6V1G3-8:1	2.03e-06	0.973696	0.973696
COL5A1	lnc-BEND4-4:1	2.03e-06	-0.973694	0.973694
GNG7	lnc-C6orf146-1:3	2.07e-06	-0.973576	0.973576
MYC	lnc-SPTBN5-3:1	2.07e-06	0.973554	0.973554
CREB3L1	lnc-DGKZ-1:1	2.08e-06	0.973546	0.973546
COL4A1	lnc-NXF5-2:1	2.08e-06	-0.973527	0.973527
LPAR6	lnc-MS4A6E-1:1	2.09e-06	0.973486	0.973486
NFKB1	lnc-OR10AB1P-4:1	2.1e-06	0.973467	0.973467
KIT	lnc-LARP6-3:1	2.11e-06	0.973438	0.973438
GNG7	lnc-PPM1N-1:1	2.12e-06	0.973408	0.973408
COL5A1	lnc-SMAD5-7:1	2.12e-06	0.973391	0.973391
COL5A1	lnc-THBS3-2:3	2.12e-06	0.973389	0.973389
COL1A1	lnc-CPLX1-4:1	2.13e-06	-0.973381	0.973381
COL4A2	lnc-OBFC2A-12:1	2.13e-06	0.973372	0.973372
COL6A1	lnc-COL6A3-7:1	2.14e-06	0.973353	0.973353
GNG7	lnc-USP48-1:1	2.15e-06	0.973314	0.973314
LPAR6	lnc-TAGLN-1:1	2.16e-06	0.973264	0.973264
FGF10	lnc-LAMB4-2:1	2.17e-06	0.973241	0.973241
ITGB1	lnc-ROR1-2:1	2.19e-06	0.9732	0.9732
COL5A1	lnc-LMO3-1:1	2.19e-06	-0.973172	0.973172
NRAS	lnc-BRE-2:1	2.2e-06	0.973155	0.973155
GNG7	lnc-MYOM1-8:1	2.2e-06	-0.973151	0.973151
FGF10	lnc-CTSL1-4:1	2.21e-06	0.973117	0.973117
CSF1R	lnc-ANXA3-4:1	2.23e-06	0.973051	0.973051
COL6A1	lnc-VOPP1-2:6	2.25e-06	0.972998	0.972998
COL1A1	lnc-STK38-1:1	2.25e-06	0.972991	0.972991
COL6A1	lnc-SWI5-3:1	2.26e-06	0.972967	0.972967
LPAR6	lnc-GTDC1-12:1	2.26e-06	0.972958	0.972958
IFNAR2	lnc-ATG16L1-4:1	2.28e-06	0.972924	0.972924
AKT3	lnc-LHFPL2-1:1	2.28e-06	-0.972924	0.972924
MYC	lnc-TEX2-2:1	2.28e-06	0.972919	0.972919
FGF10	lnc-TRIM32-12:1	2.28e-06	0.972916	0.972916
CDKN1A	lnc-ZFP36L1-4:1	2.3e-06	0.97286	0.97286
CSF1R	lnc-SIDT2-1:1	2.3e-06	0.972849	0.972849
MYC	lnc-ENTPD1-2:1	2.31e-06	0.972827	0.972827
IGF1	lnc-FCER1G-1:1	2.31e-06	0.972821	0.972821
CCNE1	lnc-ZFP36L1-4:1	2.32e-06	0.97278	0.97278
MYC	lnc-RP11-182J1.16.1-4:1	2.34e-06	-0.972748	0.972748
LPAR6	lnc-CASP12-3:1	2.35e-06	0.972691	0.972691
COL4A1	lnc-TPD52L1-5:1	2.36e-06	-0.972668	0.972668
LPAR6	lnc-SIDT2-1:1	2.38e-06	0.972606	0.972606
NFKB1	lnc-TPD52L1-5:1	2.4e-06	-0.972562	0.972562
NRAS	lnc-WDR27-5:1	2.41e-06	0.972533	0.972533
PIK3CG	lnc-LILRA4-1:2	2.41e-06	0.972525	0.972525
COL1A1	lnc-GNAT3-4:1	2.42e-06	0.972492	0.972492
COL1A1	lnc-FAM65B-3:5	2.46e-06	-0.972374	0.972374
VEGFC	lnc-C21orf7-5:1	2.47e-06	0.972367	0.972367
LPAR6	lnc-LACTB-2:1	2.51e-06	0.97226	0.97226
COL1A2	lnc-TXNDC2-6:1	2.52e-06	0.972219	0.972219
PIK3CG	lnc-MS4A6A-1:2	2.52e-06	0.972209	0.972209
SGK1	lnc-ZDHHC23-1:1	2.53e-06	-0.972178	0.972178
AKT3	lnc-TPST2-1:1	2.56e-06	-0.972103	0.972103
VEGFB	lnc-RCE1-2:1	2.57e-06	0.972084	0.972084
THBS2	lnc-C4orf26-3:1	2.57e-06	-0.972083	0.972083
NRAS	lnc-SLC25A5-3:1	2.57e-06	0.972072	0.972072
AKT3	lnc-GTF2A2-6:1	2.58e-06	-0.972046	0.972046
COL1A1	lnc-CLNS1A-3:1	2.6e-06	-0.97201	0.97201
LPAR6	lnc-FAM189A1-5:1	2.6e-06	0.972005	0.972005
ITGA7	lnc-AC016251.1-12:1	2.62e-06	0.971955	0.971955
ITGAV	lnc-HACL1-9:1	2.63e-06	0.971924	0.971924
COL6A3	lnc-FANK1-2:1	2.64e-06	0.971881	0.971881
THBS2	lnc-CTSA-1:1	2.65e-06	0.971874	0.971874
PRKCZ	lnc-DLG1-2:1	2.66e-06	0.971846	0.971846
THBS2	lnc-SMAD5-7:1	2.66e-06	0.971832	0.971832
COL4A1	lnc-GRK7-2:1	2.66e-06	0.971826	0.971826
PIK3CG	lnc-CEPT1-2:1	2.68e-06	0.97179	0.97179
PIK3CG	lnc-ECHDC3-9:1	2.69e-06	0.971765	0.971765
THBS2	lnc-NBN-2:1	2.69e-06	-0.971761	0.971761
IL4R	lnc-AP3S2-1:1	2.71e-06	0.971708	0.971708
ITGB5	ENST00000623639.1	2.71e-06	0.971704	0.971704
COL5A1	lnc-HIST4H4-1:2	2.71e-06	-0.971692	0.971692
COL1A1	lnc-MTNR1A-3:1	2.72e-06	0.971686	0.971686
COL6A2	lnc-FAM207A-8:1	2.74e-06	0.971631	0.971631
COL6A2	lnc-SEPT14-5:1	2.74e-06	0.971623	0.971623
ITGAV	lnc-CDC42BPA-5:1	2.75e-06	0.9716	0.9716
FGFR2	lnc-MYOM2-14:1	2.76e-06	0.971578	0.971578
COL5A1	lnc-BNIP1-6:1	2.76e-06	-0.971572	0.971572
COL5A1	lnc-AC112721.1.1-2:1	2.8e-06	0.971475	0.971475
COL6A3	lnc-THAP6-3:1	2.81e-06	-0.971451	0.971451
GNG7	lnc-FOSB-1:1	2.84e-06	0.971381	0.971381
COL5A1	lnc-BNIP1-4:1	2.84e-06	-0.971358	0.971358
NRAS	lnc-TMEM75-17:1	2.86e-06	-0.971325	0.971325
FGF11	lnc-ACADL-3:1	2.86e-06	-0.971319	0.971319
COL4A1	lnc-CHRNA1-2:6	2.86e-06	0.971307	0.971307
AKT3	lnc-FICD-3:1	2.87e-06	0.971305	0.971305
NRAS	lnc-CFH-2:1	2.87e-06	-0.971301	0.971301
LPAR6	lnc-ZEB2-1:1	2.87e-06	0.971285	0.971285
THBS2	lnc-GORAB-1:1	2.88e-06	0.971272	0.971272
MYC	lnc-PRICKLE2-6:1	2.88e-06	0.971269	0.971269
GNG7	ENST00000606707.1	2.88e-06	0.971262	0.971262
AKT3	lnc-TXNDC2-6:1	2.89e-06	-0.971252	0.971252
COL6A3	lnc-AL136219.1-7:1	2.93e-06	0.971139	0.971139
TNC	lnc-WISP1-5:2	2.97e-06	0.971053	0.971053
PDGFRB	lnc-FBXO28-6:1	3e-06	0.970962	0.970962
PIK3AP1	lnc-MYH13-3:1	3.01e-06	0.970957	0.970957
COL6A1	lnc-TNFRSF1A-1:1	3.01e-06	-0.970936	0.970936
COL1A1	lnc-RPGR-4:1	3.02e-06	0.970934	0.970934
PIK3CG	lnc-CLEC2L-3:3	3.03e-06	0.970898	0.970898
NRAS	lnc-RP11-171N4.2.1-4:1	3.04e-06	0.970885	0.970885
TLR4	lnc-SLC38A9-5:2	3.05e-06	0.970858	0.970858
CCND1	lnc-SLC2A14-2:1	3.05e-06	0.97085	0.97085
ITGAV	lnc-ANGPTL1-6:1	3.07e-06	0.97081	0.97081
CSF1R	lnc-CLEC2L-3:2	3.07e-06	0.970808	0.970808
MYC	lnc-PLA2G7-3:1	3.08e-06	0.970767	0.970767
NRAS	lnc-MAP2K6-5:1	3.09e-06	-0.970758	0.970758
FGF11	lnc-SF3B5-3:1	3.11e-06	-0.970709	0.970709
COL1A2	lnc-AP3S2-2:1	3.11e-06	0.970699	0.970699
COL6A3	lnc-TTC23L-1:1	3.13e-06	0.970652	0.970652
PIK3CG	lnc-LILRA4-1:6	3.15e-06	0.970607	0.970607
TLR4	lnc-RNF145-5:1	3.17e-06	0.970573	0.970573
LPAR6	lnc-PLVAP-4:1	3.18e-06	0.97053	0.97053
THBS2	lnc-TMEM194B-5:1	3.2e-06	-0.970501	0.970501
GNG7	lnc-TERF2IP-1:1	3.2e-06	-0.970495	0.970495
PGF	lnc-KIAA1244-2:1	3.21e-06	0.970482	0.970482
KDR	lnc-ST6GALNAC5-3:1	3.21e-06	0.970464	0.970464
ITGB1	ENST00000610486.1	3.22e-06	-0.970443	0.970443
AKT3	lnc-HIVEP2-3:1	3.24e-06	0.970401	0.970401
COL4A1	ENST00000619032.1	3.24e-06	-0.970395	0.970395
SGK1	lnc-FRMD1-4:1	3.25e-06	-0.970387	0.970387
MCL1	lnc-PAICS-2:1	3.26e-06	-0.970345	0.970345
GNG7	lnc-C9orf89-3:1	3.28e-06	-0.9703	0.9703
KDR	lnc-KIAA1468-3:1	3.3e-06	0.97026	0.97026
SGK1	ENST00000392176	3.32e-06	0.970224	0.970224
SGK1	lnc-ACTB-2:1	3.32e-06	0.970209	0.970209
COL5A1	lnc-SLC22A23-7:1	3.34e-06	0.970173	0.970173
COL6A3	lnc-AL136219.1-4:7	3.35e-06	0.970153	0.970153
CCNE1	lnc-HJURP-12:1	3.35e-06	0.970148	0.970148
IGF1	lnc-DAZL-4:1	3.37e-06	0.970114	0.970114
COL5A1	ENST00000610486.1	3.37e-06	-0.970113	0.970113
THBS2	lnc-RAB23-6:1	3.39e-06	0.970061	0.970061
SGK1	lnc-NBN-2:1	3.39e-06	-0.970056	0.970056
CSF1R	lnc-LACTB-2:1	3.4e-06	0.970041	0.970041
CSF1R	lnc-BEND7-2:1	3.41e-06	0.970017	0.970017
ITGB1	lnc-AL136219.1-7:1	3.42e-06	0.969993	0.969993
IL3RA	lnc-AC016251.1-12:1	3.42e-06	0.969987	0.969987
COL1A2	lnc-GRM6-4:1	3.46e-06	0.969901	0.969901
ITGB1	lnc-AMY2B-1:1	3.47e-06	-0.969888	0.969888
KDR	lnc-CTD-2117L12.1.1-3:1	3.49e-06	0.969845	0.969845
PIK3CG	lnc-HEXIM2-5:1	3.49e-06	0.969841	0.969841
CSF1R	lnc-TAGLN-1:1	3.55e-06	0.969713	0.969713
COL6A3	lnc-TTC23L-2:1	3.58e-06	0.969638	0.969638
CSF1R	lnc-CASP12-3:1	3.59e-06	0.969628	0.969628
COL6A2	lnc-MICALCL-2:1	3.64e-06	0.96952	0.96952
PIK3AP1	lnc-GNG4-8:1	3.65e-06	0.96949	0.96949
SGK1	lnc-DCDC5-2:1	3.66e-06	-0.969477	0.969477
COL4A1	lnc-CHRNA1-5:1	3.66e-06	0.969476	0.969476
COL1A2	lnc-FGGY-1:2	3.66e-06	-0.969468	0.969468
CCNE1	lnc-IGSF9-1:1	3.69e-06	0.969424	0.969424
COL5A1	lnc-TNFRSF1A-1:1	3.69e-06	-0.969418	0.969418
ITGB1	lnc-TNFRSF1A-1:1	3.69e-06	-0.969413	0.969413
THBS3	lnc-DIRC1-3:1	3.7e-06	0.969398	0.969398
SGK1	lnc-XRCC3-4:1	3.7e-06	-0.969389	0.969389
BCL2L11	lnc-SRGAP1-1:1	3.72e-06	0.969348	0.969348
COL6A3	lnc-ARHGAP6-4:1	3.72e-06	0.969345	0.969345
MCL1	lnc-C9orf89-3:1	3.74e-06	-0.969306	0.969306
FGF10	lnc-PACRGL-7:1	3.74e-06	0.969303	0.969303
GNG7	lnc-LRRC49-9:1	3.75e-06	-0.96929	0.96929
CSF1R	lnc-QDPR-5:1	3.75e-06	0.969286	0.969286
ITGA7	lnc-GPR110-1:1	3.75e-06	0.969285	0.969285
LPAR6	lnc-PACRG-4:1	3.77e-06	0.969253	0.969253
TNC	lnc-LRRC49-9:1	3.77e-06	-0.969242	0.969242
SGK1	lnc-RP11-171N4.2.1-4:1	3.78e-06	0.969227	0.969227
PIK3CG	lnc-XK-2:1	3.79e-06	0.969199	0.969199
FGF7	lnc-CNTNAP3B-7:1	3.81e-06	0.969174	0.969174
NRAS	lnc-TRPC7-6:1	3.81e-06	0.969168	0.969168
MCL1	lnc-FOSB-1:1	3.81e-06	0.969161	0.969161
FGF11	lnc-ACSL6-1:1	3.81e-06	0.96916	0.96916
KDR	lnc-AC016251.1-12:1	3.83e-06	0.969126	0.969126
GNG7	lnc-FAM120A-4:1	3.83e-06	-0.969124	0.969124
CCNE1	lnc-GNAT3-4:1	3.86e-06	0.969061	0.969061
BCL2L11	lnc-SCN2A-4:1	3.86e-06	0.969057	0.969057
GNG7	lnc-HAPLN3-4:1	3.87e-06	-0.969036	0.969036
COL1A1	lnc-HIVEP2-3:1	3.88e-06	-0.969033	0.969033
COL6A1	lnc-BNIP1-6:1	3.89e-06	-0.969004	0.969004
SGK1	lnc-DMRTA2-11:1	3.89e-06	-0.969002	0.969002
AKT3	lnc-LINGO4-1:1	3.91e-06	0.96897	0.96897
FGF10	lnc-FAM186B-4:1	3.95e-06	0.968877	0.968877
ITGB1	lnc-PYCR1-1:1	3.96e-06	0.968857	0.968857
YWHAH	lnc-KCNN4-4:1	3.97e-06	0.968853	0.968853
FGFR2	lnc-ATE1-6:2	3.97e-06	0.968849	0.968849
COL1A2	lnc-DFNA5-5:4	3.97e-06	0.96884	0.96884
CSF1R	lnc-G6PC2-1:1	3.97e-06	0.968836	0.968836
CSF1R	lnc-CD36-5:1	3.98e-06	0.968828	0.968828
COL5A1	ENST00000623984.1	3.98e-06	-0.968824	0.968824
COL1A1	lnc-KCND3-3:1	3.99e-06	0.968805	0.968805
COL4A2	lnc-TPD52L1-5:1	4.03e-06	-0.968724	0.968724
PRLR	lnc-MLLT4-1:1	4.05e-06	0.968687	0.968687
CSF1R	lnc-SSTR3-2:1	4.06e-06	0.968677	0.968677
IL4R	lnc-MSN-5:1	4.06e-06	0.968672	0.968672
LPAR6	lnc-ATE1-7:1	4.07e-06	-0.968639	0.968639
COL1A1	lnc-INSL5-1:1	4.08e-06	-0.968628	0.968628
IL4R	lnc-C1orf196-1:1	4.09e-06	0.968614	0.968614
COL6A1	lnc-FERMT2-3:1	4.09e-06	0.968607	0.968607
GNG7	lnc-MLLT4-1:1	4.09e-06	-0.968603	0.968603
PGF	lnc-LPAR3-1:1	4.11e-06	-0.968573	0.968573
CDKN1A	lnc-TRPC7-6:1	4.11e-06	0.968564	0.968564
THBS2	ENST00000610486.1	4.13e-06	-0.968529	0.968529
GNG7	lnc-CYP3A7-2:7	4.13e-06	-0.968526	0.968526
ITGB1	ENST00000623984.1	4.14e-06	-0.968522	0.968522
COL1A1	lnc-TPST2-1:1	4.14e-06	0.968514	0.968514
IL4R	lnc-TXNDC2-6:1	4.14e-06	0.968505	0.968505
GNG7	lnc-FRMD1-4:1	4.17e-06	-0.968448	0.968448
CSF1R	lnc-PDGFRB-2:1	4.18e-06	0.968438	0.968438
AKT3	lnc-TSPAN13-5:1	4.19e-06	-0.968423	0.968423
